# Supplementary material for: Galactolipid and Phospholipid Profile and Proteome Alterations in Soybean Leaves at the Onset of Salt Stress
Source: Front Plant Sci. 2021 Mar 17;12:644408. doi: 10.3389/fpls.2021.644408 (PMC8010258; doi:10.3389/fpls.2021.644408)
Supplement: Supplementary file 2 [file Table_1.xlsx]

## Sheet: 1_summary
Supplememtary Table S1
Lipidomic datasets following salt treatment										C: Control; S: Salt treatment
	0h-C	0.5h-C	1h-C	2h-C	0h-S	0.5h-S	1h-S	2h-S		Worksheet	Sheet Name	Data Type
	ave	ave	ave	ave	ave	ave	ave	ave		1	Summary
DGDG(34:4)	0.0534061	0.0414428	0.038369	0.0417623	0.0437401	0.0360488	0.0428388	0.0436483		2	DGDG lipid species concentration	normalized signal per mass dry weight
DGDG(34:3)	1.95322	1.64678	1.56016	1.64293	1.73663	1.36356	1.88555	1.88655		3	MGDG lipid species concentration	normalized signal per mass dry weight
DGDG(34:1)	0.0256215	0.0233925	0.0211424	0.0241389	0.021353	0.0151163	0.0256134	0.0270332		4	PG lipid species concentration	normalized signal per mass dry weight
DGDG(36:6)	5.1792	4.54498	4.09692	4.41255	4.55337	3.6272	4.62489	4.68837		5	PE lipid species concentration	normalized signal per mass dry weight
DGDG(36:5)	0.280583	0.234731	0.210408	0.22776	0.248846	0.197339	0.251025	0.227631		6	PC lipid species concentration	normalized signal per mass dry weight
DGDG(36:4)	0.112138	0.0903472	0.0845474	0.0817143	0.101742	0.0754079	0.0999466	0.0980188		7	PI lipid species concentration	normalized signal per mass dry weight
DGDG(36:3)	0.505091	0.475499	0.433802	0.464239	0.478744	0.374055	0.466085	0.496328		8	PS lipid species concentration	normalized signal per mass dry weight
Total DGDG	8.15816	7.09605	6.48497	6.92059	7.24162	5.72253	7.43821	7.49433		9	PA lipid species concentration	normalized signal per mass dry weight
										10	LysoPC lipid species concentration	normalized signal per mass dry weight
	0h-C	0.5h-C	1h-C	2h-C	0h-S	0.5h-S	1h-S	2h-S
MGDG(34:6)	0.0195481	0.0151502	0.014371	0.0153213	0.0157696	0.0112173	0.0156735	0.0118119		Lipid Abbreviations
MGDG(34:5)	0.0139503	0.0132311	0.0112938	0.0110782	0.0118003	0.00869415	0.0126529	0.0100108		lysoPG	lysophosphatidylglycerol
MGDG(34:4)	0.109719	0.0888953	0.0901588	0.0883977	0.0930741	0.0752586	0.102388	0.0968066		PG	phosphatidylglycerol
MGDG(34:3)	0.65534	0.521297	0.496373	0.538148	0.537988	0.444667	0.60184	0.570194		lysoPE	lysophosphatidylethanolamine
MGDG(36:6)	23.3224	19.4534	18.7421	19.7253	19.5977	16.2837	20.1731	19.5596		PE	phosphatidylethanolamine
MGDG(36:5)	0.561461	0.498865	0.521845	0.487102	0.534223	0.441079	0.59924	0.546929		lysoPC	lysophosphatidylcholine
MGDG(36:4)	0.34629	0.297809	0.29586	0.296766	0.301784	0.242654	0.353023	0.320225		PC	phosphatidylcholine
MGDG(36:3)	0.251877	0.224893	0.20242	0.236317	0.227931	0.187529	0.223274	0.217467		PA	phosphatidic acid
MGDG(38:6)	0.049558	0.0402162	0.0402898	0.0396181	0.0444237	0.0337379	0.037455	0.0426824		PI	phosphatidylinositol
MGDG(38:5)	0.0238263	0.0146765	0.0107542	0.0113312	0.0149836	0.00921878	0.0128868	0.0100403		PS	phosphatidylserine
Total MGDG	25.3871	21.191	20.449	21.4688	21.3981	17.7608	22.1607	21.4104		DGDG	digalactosyldiacylglycerol
										MGDG	monogalactosyldiacylglycerol
	0h-C	0.5h-C	1h-C	2h-C	0h-S	0.5h-S	1h-S	2h-S
	ave	ave	ave	ave	ave	ave	ave	ave
PE(34:3)	0.35073	0.313976	0.366509	0.300092	0.332264	0.239967	0.298638	0.237634
PE(34:2)	0.866391	0.731117	0.919786	0.680872	0.79046	0.555376	0.764594	0.578284
PE(34:1)	0.0274189	0.029237	0.0267937	0.0187673	0.0214604	0.0160629	0.0287969	0.0247427
PE(36:6)	0.0388162	0.039431	0.0457442	0.0362658	0.0379254	0.0249974	0.0311756	0.0242425
PE(36:5)	0.243085	0.20588	0.273344	0.201899	0.233269	0.157484	0.214799	0.150799
PE(36:4)	0.396889	0.342309	0.45417	0.333526	0.349783	0.253521	0.374625	0.267102
PE(36:3)	0.103301	0.08735	0.111455	0.0811721	0.0975742	0.0674242	0.0927682	0.0725717
PE(36:2)	0.176792	0.14791	0.197528	0.142812	0.161988	0.111099	0.157359	0.126172
PE(40:2)	0.0151015	0.0125625	0.0200766	0.0134975	0.0162297	0.00845781	0.0118965	0.00962436
Total PE	2.2728	1.96154	2.48796	1.8551	2.10636	1.46864	2.02966	1.53179
	0h-C	0.5h-C	1h-C	2h-C	0h-S	0.5h-S	1h-S	2h-S
	ave	ave	ave	ave	ave	ave	ave	ave
PC(34:4)	0.00944262	0.00632572	0.00704804	0.00620122	0.00817326	0.0057706	0.00620272	0.0051632
PC(34:3)	0.596331	0.479425	0.500212	0.516528	0.525288	0.413177	0.498621	0.436031
PC(34:2)	1.09328	0.878588	0.929933	0.89674	0.951741	0.735352	0.982053	0.80404
PC(34:1)	0.0671756	0.0634873	0.0820322	0.0754201	0.064226	0.0497363	0.0816126	0.0853715
PC(36:6)	0.155657	0.130387	0.133462	0.135999	0.149726	0.107361	0.128198	0.104614
PC(36:5)	0.512815	0.431898	0.472757	0.435521	0.469336	0.358707	0.442562	0.345526
PC(36:4)	0.565736	0.467301	0.592057	0.493794	0.516049	0.401857	0.550649	0.422752
PC(36:3)	0.294595	0.257814	0.293884	0.280429	0.277861	0.202812	0.28273	0.249357
PC(36:2)	0.422665	0.35463	0.388569	0.356777	0.389607	0.284428	0.39783	0.323273
PC(36:1)	0.0395556	0.032983	0.0358184	0.0375922	0.0357861	0.0274466	0.0338116	0.0436057
PC(38:4)	0.0121414	0.00798612	0.00847214	0.00826548	0.00920229	0.00743115	0.00692781	0.00778656
PC(38:3)	0.0302378	0.0256182	0.0253569	0.0245615	0.02635	0.0211143	0.0246712	0.0206503
PC(38:2)	0.0301652	0.0229951	0.026699	0.0267879	0.028169	0.0181111	0.0264182	0.0209661
Total PC	3.85496	3.18261	3.51983	3.31193	3.47723	2.64873	3.48973	2.89163
	0h-C	0.5h-C	1h-C	2h-C	0h-S	0.5h-S	1h-S	2h-S
	ave	ave	ave	ave	ave	ave	ave	ave
PA(34:3)	0.253633	0.252219	0.245351	0.190323	0.314264	0.226956	0.274463	0.277449
PA(34:2)	0.617426	0.591524	0.570725	0.466727	0.714181	0.502091	0.684781	0.631998
PA(34:1)	0.0290738	0.028815	0.0205301	0.03002	0.0468861	0.0333205	0.0354648	0.0502654
PA(36:6)	0.0416506	0.0402116	0.0326181	0.0248163	0.0516611	0.0295615	0.0402601	0.0404413
PA(36:5)	0.169986	0.17892	0.171922	0.112871	0.212308	0.156146	0.196658	0.152207
PA(36:4)	0.25224	0.260442	0.23648	0.185624	0.303997	0.232186	0.303394	0.240272
PA(36:3)	0.113568	0.120737	0.120931	0.0933038	0.145854	0.107726	0.146838	0.146385
PA(36:2)	0.176626	0.150959	0.161653	0.110988	0.194601	0.140906	0.188637	0.159176
Total PA	1.66287	1.63608	1.56656	1.22165	2.00024	1.43898	1.88226	1.7082
	0h-C	0.5h-C	1h-C	2h-C	0h-S	0.5h-S	1h-S	2h-S
	ave	ave	ave	ave	ave	ave	ave	ave
PG(32:1)	2.2782	1.8322	1.76283	1.73641	1.93925	1.47999	2.04606	1.9347
PG(32:0)	0.353397	0.264523	0.250831	0.242775	0.351118	0.212205	0.291865	0.200261
PG(34:4)	0.583258	0.4814	0.493004	0.509897	0.500516	0.404526	0.531532	0.463938
PG(34:3)	0.442931	0.363598	0.383866	0.4034	0.395963	0.307251	0.370169	0.363315
PG(34:2)	1.42304	1.14623	1.11606	1.14235	1.20542	0.988282	1.23839	1.225
PG(34:1)	0.623601	0.520871	0.522126	0.53718	0.599515	0.425765	0.594453	0.572939
PG(34:0)	0.0873617	0.0759717	0.0829748	0.0638799	0.118612	0.0665603	0.0601659	0.0581272
Total PG	5.81782	4.70495	4.63398	4.65984	5.13647	3.90203	5.15453	4.84062
	0h-C	0.5h-C	1h-C	2h-C	0h-S	0.5h-S	1h-S	2h-S
	ave	ave	ave	ave	ave	ave	ave	ave
PI(32:3)	0.00589948	0.00400412	0.002	0.00163153	0.0040244	0.00218565	0.002	0.00219339
PI(32:1)	0.0059113	0.00198119	0.002	0.00351985	0.00427821	0.00269269	0.007	0.00509982
PI(34:3)	0.466278	0.382379	0.385	0.37844	0.427471	0.334119	0.403	0.374929
PI(34:2)	0.547226	0.449577	0.455	0.429291	0.51648	0.392714	0.488	0.442052
PI(36:6)	0.0133409	0.0107569	0.011	0.0116306	0.0132962	0.00877684	0.011	0.00938135
PI(36:5)	0.0189957	0.0158335	0.016	0.018168	0.0187492	0.0141564	0.019	0.0158072
PI(36:4)	0.0190904	0.015222	0.017	0.0145896	0.0172654	0.0117744	0.017	0.013406
PI(36:3)	0.046452	0.0429716	0.045	0.0408293	0.0507583	0.0362785	0.046	0.0392989
PI(36:2)	0.0589626	0.0511797	0.056	0.0505033	0.0627268	0.0436365	0.057	0.0501605
Total PI	1.20405	0.989022	1.007	0.961098	1.13787	0.86074	1.066	0.968438
	0h-C	0.5h-C	1h-C	2h-C	0h-S	0.5h-S	1h-S	2h-S
	ave	ave	ave	ave	ave	ave	ave	ave
LPC(16:0)	0.007	0.004	0.006	0.006	0.008	0.006	0.011	0.01
LPC(18:3)	0.011	0.011	0.009	0.008	0.011	0.009	0.012	0.013
LPC(18:2)	0.024	0.02	0.017	0.013	0.023	0.013	0.027	0.023
Total LysoPC	0.047	0.039	0.039	0.03	0.049	0.032	0.055	0.052
	0h-C	0.5h-C	1h-C	2h-C	0h-S	0.5h-S	1h-S	2h-S
	ave	ave	ave	ave	ave	ave	ave	ave
PS(34:3)	0.00816166	0.00745908	0.00769902	0.00548747	0.00749692	0.00249903	0.00526857	0.00582681
PS(34:2)	0.0159712	0.0132424	0.0160637	0.0120916	0.0150893	0.00947643	0.0154769	0.0124238
PS(36:3)	0.0090482	0.00791322	0.00937989	0.00650619	0.00737369	0.00501381	0.00695299	0.00660266
PS(36:2)	0.0204585	0.0192548	0.0213081	0.0150188	0.0239235	0.0139336	0.0191775	0.0161158
PS(38:3)	0.00670005	0.00668041	0.00491059	0.00527077	0.0044657	0.00345785	0.00504451	0.00526547
PS(38:2)	0.0184161	0.0188148	0.0196343	0.0130114	0.0214542	0.0160395	0.0180561	0.0139919
PS(40:3)	0.0120642	0.00846438	0.0119458	0.00918989	0.0137393	0.00813356	0.00964451	0.00749504
PS(40:2)	0.0300637	0.0321811	0.0355985	0.0296996	0.0335245	0.0255115	0.0315313	0.0257555
PS(42:3)	0.0169965	0.0173747	0.0169648	0.0163658	0.0203397	0.0118011	0.0137855	0.0191488
PS(42:2)	0.0509868	0.0458911	0.04676	0.0396806	0.0569755	0.0369737	0.0473306	0.0461186
Total PS	0.195592	0.182644	0.197517	0.159883	0.215991	0.137605	0.181437	0.164634

## Sheet: 2_DGDG
		Normal condition	Normal condition	Normal condition	Normal condition	Normal condition	Normal condition
Compound Formula	Compound Name	0h-1	0h-2	0h-3	0h-4	0h-5	ave	stdev
C49H84O15	DGDG(34:4)	0.0374054	0.0400566	0.0478778	0.0333978	0.059963	0.0437401	0.0104995
C49H86O15	DGDG(34:3)	1.70534	1.5209	1.84182	1.71559	1.89947	1.73663	0.146238
C49H90O15	DGDG(34:1)	0.0237904	0.0203124	0.0258799	0.0171271	0.0196553	0.021353	0.00347337
C51H84O15	DGDG(36:6)	4.88744	4.30304	4.98413	3.98285	4.6094	4.55337	0.414864
C51H86O15	DGDG(36:5)	0.265449	0.245766	0.266161	0.232386	0.234468	0.248846	0.0162988
C51H88O15	DGDG(36:4)	0.110898	0.10821	0.105504	0.0646263	0.11947	0.101742	0.021399
C51H90O15	DGDG(36:3)	0.491258	0.539883	0.50463	0.417302	0.440649	0.478744	0.0494748
	Total DGDG	7.58593	6.8688	7.84601	6.49816	7.4092	7.24162	0.548555
		Normal condition	Normal condition	Normal condition	Normal condition	Normal condition	Normal condition		Salt treatment	Salt treatment	Salt treatment	Salt treatment	Salt treatment	Salt treatment
Compound Formula	Compound Name	0.5h-1	0.5h-2	0.5h-3	0.5h-4	0.5h-5	ave	stdev	0.5h-1	0.5h-2	0.5h-3	0.5h-4	0.5h-5	ave	stdev	t-test
C49H84O15	DGDG(34:4)	0.0324675	0.047404	0.0410101	0.0442869	0.0420455	0.0414428	0.00558413	0.0208881	0.0434581	0.037105	0.0356263	0.0431666	0.0360488	0.00917473	0.294016
C49H86O15	DGDG(34:3)	1.62996	1.83492	1.64256	1.62426	1.50219	1.64678	0.119489	1.02984	1.29491	1.52417	1.4969	1.47197	1.36356	0.207008	0.0292747
C49H90O15	DGDG(34:1)	0.0220722	0.0223577	0.0289483	0.023781	0.019803	0.0233925	0.00341748	0.0115886	0.015725	0.0189774	0.0153292	0.0139615	0.0151163	0.00269732	0.00279673
C51H84O15	DGDG(36:6)	4.12432	4.7784	4.46395	4.76498	4.59323	4.54498	0.268673	2.94416	3.5535	4.02159	3.67314	3.94363	3.6272	0.42713	0.00359857
C51H86O15	DGDG(36:5)	0.252649	0.252755	0.211181	0.246098	0.210974	0.234731	0.0217609	0.130078	0.184583	0.228323	0.224148	0.219565	0.197339	0.041411	0.111698
C51H88O15	DGDG(36:4)	0.0751595	0.105534	0.0953308	0.0953805	0.0803313	0.0903472	0.0123672	0.0627786	0.0831708	0.0887688	0.0615724	0.0807486	0.0754079	0.012432	0.0932484
C51H90O15	DGDG(36:3)	0.47958	0.479388	0.486985	0.428458	0.503082	0.475499	0.0280064	0.288541	0.377371	0.424555	0.417268	0.362542	0.374055	0.0544833	0.00601829
	Total DGDG	6.64303	7.57	6.98458	7.27973	7.00289	7.09605	0.348104	4.5008	5.57779	6.38909	5.98138	6.16356	5.72253	0.744878	0.00574287
		Normal condition	Normal condition	Normal condition	Normal condition	Normal condition	Normal condition		Salt treatment	Salt treatment	Salt treatment	Salt treatment	Salt treatment	Salt treatment
Compound Formula	Compound Name	1h-1	1h-2	1h-3	1h-4	1h-5	ave	stdev	1h-1	1h-2	1h-3	1h-4	1h-5	ave	stdev	t-test
C49H84O15	DGDG(34:4)	0.0397219	0.0386286	0.0373256	0.0368203	0.0393487	0.038369	0.00125944	0.055608	0.0507664	0.0356999	0.0397385	0.0323812	0.0428388	0.00994781	0.34807
C49H86O15	DGDG(34:3)	1.56068	1.46234	1.64748	1.38636	1.74396	1.56016	0.142465	2.58047	1.6888	1.69757	1.82699	1.63391	1.88555	0.394877	0.121289
C49H90O15	DGDG(34:1)	0.0190098	0.0201727	0.0212271	0.0215499	0.0237523	0.0211424	0.00176586	0.0221863	0.0269607	0.0268108	0.0257725	0.0263367	0.0256134	0.00197118	0.00540605
C51H84O15	DGDG(36:6)	4.5586	4.14823	4.40493	3.28509	4.08777	4.09692	0.492395	6.14669	3.82649	4.13468	4.67052	4.34607	4.62489	0.904632	0.284824
C51H86O15	DGDG(36:5)	0.217364	0.178722	0.227543	0.181847	0.246566	0.210408	0.0294499	0.370512	0.233497	0.230286	0.2363	0.18453	0.251025	0.0700943	0.266475
C51H88O15	DGDG(36:4)	0.101546	0.0654969	0.102688	0.0699015	0.0831044	0.0845474	0.0173028	0.14148	0.0887408	0.0762459	0.0988856	0.0943804	0.0999466	0.0247208	0.286815
C51H90O15	DGDG(36:3)	0.4633	0.422454	0.483637	0.342201	0.457418	0.433802	0.0557469	0.635553	0.392479	0.418908	0.419961	0.463526	0.466085	0.098103	0.54021
	Total DGDG	7.00675	6.37272	6.96307	5.36272	6.71961	6.48497	0.676005	10.0263	6.34909	6.64463	7.35768	6.81332	7.43821	1.49258	0.229524
		Normal condition	Normal condition	Normal condition	Normal condition	Normal condition	Normal condition		Salt treatment	Salt treatment	Salt treatment	Salt treatment	Salt treatment	Salt treatment
Compound Formula	Compound Name	2h-1	2h-2	2h-3	2h-4	2h-5	ave	stdev	2h-1	2h-2	2h-3	2h-4	2h-5	ave	stdev	t-test
C49H84O15	DGDG(34:4)	0.0431222	0.0465467	0.0376439	0.0380152	0.0434838	0.0417623	0.00383097	0.0381994	0.051824	0.046207	0.0421374	0.0398738	0.0436483	0.0054683	0.545258
C49H86O15	DGDG(34:3)	1.70592	1.76026	1.38854	1.63725	1.72268	1.64293	0.14903	1.78896	1.81587	2.01333	1.86489	1.94968	1.88655	0.0936066	0.0147703
C49H90O15	DGDG(34:1)	0.0248452	0.02064	0.0311783	0.0230092	0.021022	0.0241389	0.00428038	0.0280415	0.0271255	0.023247	0.025197	0.0315548	0.0270332	0.00312957	0.257023
C51H84O15	DGDG(36:6)	4.60402	4.82073	4.08057	4.10516	4.45228	4.41255	0.319981	4.37528	4.53761	4.96289	4.85542	4.71064	4.68837	0.236918	0.159961
C51H86O15	DGDG(36:5)	0.254192	0.250697	0.158363	0.243555	0.23199	0.22776	0.0397118	0.185732	0.222029	0.248427	0.249436	0.23253	0.227631	0.0260713	0.995322
C51H88O15	DGDG(36:4)	0.0810754	0.0959119	0.0785637	0.074001	0.0790195	0.0817143	0.00834658	0.092537	0.0973377	0.0989863	0.106454	0.0947791	0.0980188	0.00531734	0.00618387
C51H90O15	DGDG(36:3)	0.510441	0.469424	0.427129	0.429429	0.484772	0.464239	0.0359583	0.442627	0.44126	0.512266	0.543202	0.542283	0.496328	0.0511845	0.284496
	Total DGDG	7.24489	7.51184	6.22728	6.56205	7.0569	6.92059	0.520232	6.96631	7.21324	7.94187	7.71072	7.6395	7.49433	0.395601	0.0852682

## Sheet: 3_MGDG
		Normal condition	Normal condition	Normal condition	Normal condition	Normal condition	Normal condition
Compound Formula	Compound Name	0h-1	0h-2	0h-3	0h-4	0h-5	ave	stdev
C43H70O10	MGDG(34:6)	0.0166246	0.0176135	0.0146653	0.0165562	0.0133884	0.0157696	0.00170584
C43H72O10	MGDG(34:5)	0.0126118	0.0106533	0.0110709	0.0121317	0.0125338	0.0118003	0.000887973
C43H74O10	MGDG(34:4)	0.0947317	0.0880677	0.0869853	0.0830664	0.11252	0.0930741	0.011653
C43H76O10	MGDG(34:3)	0.571113	0.479401	0.532264	0.507961	0.599202	0.537988	0.0479878
C45H74O10	MGDG(36:6)	21.0674	18.4337	21.2919	17.0992	20.0962	19.5977	1.79418
C45H76O10	MGDG(36:5)	0.47019	0.664598	0.402404	0.527486	0.606438	0.534223	0.104564
C45H78O10	MGDG(36:4)	0.293511	0.320453	0.296756	0.272606	0.325595	0.301784	0.0215669
C45H80O10	MGDG(36:3)	0.203365	0.300993	0.233351	0.210235	0.191711	0.227931	0.0435773
C47H78O10	MGDG(38:6)	0.0521956	0.0376702	0.0510697	0.0401345	0.0410483	0.0444237	0.00670767
C47H80O10	MGDG(38:5)	0.0174845	0.012784	0.0191224	0.0154144	0.0101125	0.0149836	0.00361024
	Total MGDG	22.8114	20.3885	22.9517	18.8096	22.0291	21.3981	1.76983
		Normal condition	Normal condition	Normal condition	Normal condition	Normal condition	Normal condition		Salt treatment	Salt treatment	Salt treatment	Salt treatment	Salt treatment	Salt treatment
Compound Formula	Compound Name	0.5h-1	0.5h-2	0.5h-3	0.5h-4	0.5h-5	ave	stdev	0.5h-1	0.5h-2	0.5h-3	0.5h-4	0.5h-5	ave	stdev	t-test
C43H70O10	MGDG(34:6)	0.017373	0.0181126	0.00922373	0.0126737	0.018368	0.0151502	0.00404124	0.00786879	0.00986385	0.0103384	0.0134841	0.0145313	0.0112173	0.00273577	0.109212
C43H72O10	MGDG(34:5)	0.0111073	0.0193861	0.0102171	0.0126737	0.0127715	0.0132311	0.00360558	0.00901334	0.0105786	0.00538164	0.00624525	0.0122519	0.00869415	0.00288446	0.0592585
C43H74O10	MGDG(34:4)	0.0830201	0.100893	0.0919535	0.093273	0.0753375	0.0888953	0.00988413	0.0620919	0.0721919	0.0853982	0.0651493	0.0914619	0.0752586	0.0127507	0.0954163
C43H76O10	MGDG(34:3)	0.469213	0.60479	0.49127	0.542407	0.498806	0.521297	0.0537049	0.34451	0.416855	0.491287	0.439722	0.530963	0.444667	0.0715016	0.0916598
C45H74O10	MGDG(36:6)	17.9124	21.2912	18.7434	20.5507	18.7691	19.4534	1.40789	13.3282	15.6258	17.8468	15.6892	18.9286	16.2837	2.17718	0.0257022
C45H76O10	MGDG(36:5)	0.640778	0.505142	0.518203	0.413221	0.416982	0.498865	0.0929952	0.365655	0.399958	0.529922	0.499165	0.410695	0.441079	0.0699463	0.299073
C45H78O10	MGDG(36:4)	0.305166	0.316121	0.313891	0.284518	0.26935	0.297809	0.0202155	0.192285	0.19885	0.261151	0.278623	0.282364	0.242654	0.0437855	0.0337899
C45H80O10	MGDG(36:3)	0.242082	0.225416	0.218531	0.217732	0.220703	0.224893	0.010063	0.131337	0.145956	0.21739	0.219435	0.223526	0.187529	0.0449757	0.107427
C47H78O10	MGDG(38:6)	0.0330656	0.0421966	0.0369233	0.0542834	0.0346122	0.0402162	0.00859052	0.0220612	0.0313356	0.035009	0.0330998	0.0471841	0.0337379	0.00901302	0.278184
C47H80O10	MGDG(38:5)	0.0224994	0.0188201	0.0116361	0.0121041	0.008323	0.0146765	0.00580077	0.00371979	0.00729067	0.0110465	0.0106453	0.0133916	0.00921878	0.00376645	0.115648
	Total MGDG	19.7487	23.16	20.4698	22.2309	20.3457	21.191	1.43818	14.4784	16.9454	19.5178	17.2869	20.5755	17.7608	2.38082	0.0247671
		Normal condition	Normal condition	Normal condition	Normal condition	Normal condition	Normal condition		Salt treatment	Salt treatment	Salt treatment	Salt treatment	Salt treatment	Salt treatment
Compound Formula	Compound Name	1h-1	1h-2	1h-3	1h-4	1h-5	ave	stdev	1h-1	1h-2	1h-3	1h-4	1h-5	ave	stdev	t-test
C43H70O10	MGDG(34:6)	0.0195772	0.0134485	0.0148163	0.0098473	0.0141655	0.014371	0.00348785	0.0214752	0.0176392	0.0111831	0.0139661	0.0141038	0.0156735	0.00397072	0.596625
C43H72O10	MGDG(34:5)	0.0130515	0.0105871	0.0142464	0.00656486	0.0120192	0.0112938	0.0029663	0.0230396	0.0121897	0.00888914	0.0113744	0.00777148	0.0126529	0.00607716	0.665079
C43H74O10	MGDG(34:4)	0.099163	0.08298	0.0935988	0.0876267	0.0874256	0.0901588	0.00629141	0.16526	0.0913508	0.080289	0.0917154	0.0833276	0.102388	0.0354973	0.469873
C43H76O10	MGDG(34:3)	0.553554	0.449666	0.54293	0.410732	0.524983	0.496373	0.0627926	0.895275	0.542225	0.522596	0.545109	0.503995	0.60184	0.164871	0.218075
C45H74O10	MGDG(36:6)	20.9419	18.434	20.8813	14.9708	18.4826	18.7421	2.43927	27.5398	17.5838	17.1244	19.815	18.8027	20.1731	4.25069	0.532113
C45H76O10	MGDG(36:5)	0.411945	0.443771	0.478935	0.542572	0.732	0.521845	0.127092	0.925966	0.618776	0.54565	0.450485	0.455323	0.59924	0.195476	0.479162
C45H78O10	MGDG(36:4)	0.279898	0.255807	0.294615	0.29813	0.350847	0.29586	0.0349618	0.526641	0.355221	0.292625	0.312725	0.277903	0.353023	0.10132	0.267212
C45H80O10	MGDG(36:3)	0.211378	0.1837	0.220819	0.165406	0.230798	0.20242	0.0271317	0.270076	0.190732	0.210759	0.23008	0.214723	0.223274	0.0296877	0.279706
C47H78O10	MGDG(38:6)	0.0518088	0.0406602	0.0500333	0.0237191	0.0352278	0.0402898	0.0114888	0.0517965	0.027563	0.0330045	0.0381835	0.0367275	0.037455	0.00900553	0.675589
C47H80O10	MGDG(38:5)	0.0141864	0.01445	0.00626841	0.00813472	0.0107315	0.0107542	0.00362019	0.0194841	0.0160617	0.0113265	0.00921473	0.00834715	0.0128868	0.00474689	0.447466
	Total MGDG	22.6245	19.9438	22.6217	16.548	20.5068	20.449	2.49648	30.4876	19.4808	18.8638	21.5462	20.4254	22.1607	4.76385	0.496891
		Normal condition	Normal condition	Normal condition	Normal condition	Normal condition	Normal condition		Salt treatment	Salt treatment	Salt treatment	Salt treatment	Salt treatment	Salt treatment
Compound Formula	Compound Name	2h-1	2h-2	2h-3	2h-4	2h-5	ave	stdev	2h-1	2h-2	2h-3	2h-4	2h-5	ave	stdev	t-test
C43H70O10	MGDG(34:6)	0.0124226	0.0148038	0.0170978	0.0152918	0.0169903	0.0153213	0.00191133	0.0137346	0.0101364	0.0119105	0.0133815	0.00989673	0.0118119	0.00177802	0.0169154
C43H72O10	MGDG(34:5)	0.00856732	0.0156579	0.0119254	0.00714572	0.0120948	0.0110782	0.00333519	0.0121609	0.0101364	0.0093275	0.00968021	0.00874928	0.0100108	0.00130443	0.523866
C43H74O10	MGDG(34:4)	0.0948116	0.100068	0.0863511	0.0675985	0.0931589	0.0883977	0.0126175	0.0854121	0.105361	0.101311	0.108902	0.0830465	0.0968066	0.0118211	0.308487
C43H76O10	MGDG(34:3)	0.564586	0.562973	0.50302	0.481335	0.578824	0.538148	0.0431028	0.560115	0.538512	0.593947	0.582806	0.575588	0.570194	0.0215502	0.175338
C45H74O10	MGDG(36:6)	21.3189	21.0663	17.6562	18.5179	20.0674	19.7253	1.59642	18.312	19.2323	19.9361	20.5631	19.7546	19.5596	0.844154	0.842537
C45H76O10	MGDG(36:5)	0.553991	0.455475	0.448393	0.551049	0.426602	0.487102	0.0606678	0.529899	0.492799	0.503226	0.653243	0.555479	0.546929	0.0642377	0.168474
C45H78O10	MGDG(36:4)	0.301284	0.28839	0.282186	0.303407	0.308562	0.296766	0.0110273	0.295723	0.307946	0.330194	0.338807	0.328457	0.320225	0.0177732	0.0364861
C45H80O10	MGDG(36:3)	0.254735	0.22889	0.237214	0.231664	0.229082	0.236317	0.0108303	0.195003	0.216718	0.225008	0.235172	0.215433	0.217467	0.0148297	0.05084
C47H78O10	MGDG(38:6)	0.0491478	0.0367534	0.0353738	0.0366146	0.0402009	0.0396181	0.00562132	0.0375127	0.0408596	0.0456617	0.0428776	0.0465003	0.0426824	0.00365854	0.336866
C47H80O10	MGDG(38:5)	0.0134221	0.0145192	0.0104886	0.0080032	0.010223	0.0113312	0.00262435	0.0107302	0.0124206	0.009471	0.00825665	0.00932301	0.0100403	0.00159388	0.374671
	Total MGDG	23.1986	22.8065	19.3034	20.2384	21.7969	21.4688	1.66522	20.0759	20.9806	21.7911	22.5911	21.6133	21.4104	0.9415	0.94727

## Sheet: 4_PG
		Normal condition	Normal condition	Normal condition	Normal condition	Normal condition	Normal condition
Compound Formula	Compound Name	0h-1	0h-2	0h-3	0h-4	0h-5	ave	stdev
C38H73O10P	PG(32:1)	2.16581	1.64427	2.04678	1.71131	2.1281	1.93925	0.243682
C38H75O10P	PG(32:0)	0.367496	0.491509	0.438325	0.286456	0.171805	0.351118	0.126409
C40H71O10P	PG(34:4)	0.583868	0.436702	0.544283	0.452783	0.484945	0.500516	0.0621616
C40H73O10P	PG(34:3)	0.433547	0.364475	0.486876	0.328658	0.366261	0.395963	0.0634063
C40H75O10P	PG(34:2)	1.44406	1.12023	1.32633	0.973744	1.16275	1.20542	0.183248
C40H77O10P	PG(34:1)	0.66252	0.583065	0.653784	0.529113	0.569093	0.599515	0.0571562
C40H79O10P	PG(34:0)	0.0914928	0.210397	0.158213	0.0763298	0.0566301	0.118612	0.0639484
	Total PG	5.78331	4.88088	5.67391	4.37677	4.9675	5.13647	0.586996
		Normal condition	Normal condition	Normal condition	Normal condition	Normal condition	Normal condition		Salt treatment	Salt treatment	Salt treatment	Salt treatment	Salt treatment	Salt treatment
Compound Formula	Compound Name	0.5h-1	0.5h-2	0.5h-3	0.5h-4	0.5h-5	ave	stdev	0.5h-1	0.5h-2	0.5h-3	0.5h-4	0.5h-5	ave	stdev	t-test
C38H73O10P	PG(32:1)	1.60255	2.09763	1.67204	1.97456	1.81421	1.8322	0.205809	1.12615	1.39423	1.70442	1.35252	1.82265	1.47999	0.281333	0.0537766
C38H75O10P	PG(32:0)	0.313317	0.194461	0.335664	0.262281	0.216892	0.264523	0.0604658	0.132116	0.193652	0.197795	0.348462	0.188998	0.212205	0.0807321	0.279556
C40H71O10P	PG(34:4)	0.360447	0.561829	0.42554	0.515949	0.543234	0.4814	0.0854925	0.341706	0.38266	0.41399	0.346157	0.538115	0.404526	0.0802605	0.180847
C40H73O10P	PG(34:3)	0.354226	0.40588	0.273919	0.399681	0.384282	0.363598	0.0539621	0.241317	0.314774	0.339995	0.318099	0.322071	0.307251	0.0381227	0.0929627
C40H75O10P	PG(34:2)	1.03493	1.28793	1.0325	1.11228	1.2635	1.14623	0.122786	0.826663	1.00092	1.08676	0.812972	1.21409	0.988282	0.171538	0.132626
C40H77O10P	PG(34:1)	0.545853	0.521019	0.488716	0.511962	0.536805	0.520871	0.0223123	0.32448	0.414282	0.451662	0.486448	0.451953	0.425765	0.0621074	0.0121936
C40H79O10P	PG(34:0)	0.0598086	0.0701296	0.0957565	0.0685805	0.0855834	0.0759717	0.0144381	0.0644955	0.0576392	0.0785153	0.0763055	0.0558459	0.0665603	0.0104468	0.271565
	Total PG	4.29904	5.14482	4.35752	4.86722	4.85616	4.70495	0.363369	3.06654	3.76976	4.29059	3.76957	4.61367	3.90203	0.589595	0.0319958
		Normal condition	Normal condition	Normal condition	Normal condition	Normal condition	Normal condition		Salt treatment	Salt treatment	Salt treatment	Salt treatment	Salt treatment	Salt treatment
Compound Formula	Compound Name	1h-1	1h-2	1h-3	1h-4	1h-5	ave	stdev	1h-1	1h-2	1h-3	1h-4	1h-5	ave	stdev	t-test
C38H73O10P	PG(32:1)	2.06761	1.68858	1.8785	1.45942	1.72003	1.76283	0.226754	2.92776	1.83995	1.69338	2.02346	1.74573	2.04606	0.50867	0.288376
C38H75O10P	PG(32:0)	0.183039	0.191003	0.223304	0.338781	0.318029	0.250831	0.0727732	0.24323	0.252088	0.268888	0.369603	0.325516	0.291865	0.05397	0.340838
C40H71O10P	PG(34:4)	0.59424	0.4731	0.547688	0.373227	0.476763	0.493004	0.0840323	0.751035	0.446113	0.443998	0.521669	0.494842	0.531532	0.127067	0.587227
C40H73O10P	PG(34:3)	0.440675	0.361094	0.411026	0.351409	0.355128	0.383866	0.0398837	0.503106	0.28124	0.322923	0.414594	0.328981	0.370169	0.0887171	0.760904
C40H75O10P	PG(34:2)	1.20858	1.08545	1.32139	0.903736	1.06114	1.11606	0.157921	1.59987	1.09404	1.00947	1.30038	1.18819	1.23839	0.229277	0.354605
C40H77O10P	PG(34:1)	0.624032	0.43224	0.574415	0.47033	0.509615	0.522126	0.0775207	0.681746	0.510761	0.538338	0.647853	0.593569	0.594453	0.0718081	0.164418
C40H79O10P	PG(34:0)	0.0385303	0.064896	0.0913479	0.0971029	0.122997	0.0829748	0.0323018	0.0461931	0.0501927	0.076676	0.0620843	0.0656834	0.0601659	0.0122619	0.178146
	Total PG	5.16862	4.31679	5.08197	4.01439	4.58814	4.63398	0.493241	6.7868	4.49004	4.37615	5.35698	4.76265	5.15453	0.988213	0.322727
		Normal condition	Normal condition	Normal condition	Normal condition	Normal condition	Normal condition		Salt treatment	Salt treatment	Salt treatment	Salt treatment	Salt treatment	Salt treatment
Compound Formula	Compound Name	2h-1	2h-2	2h-3	2h-4	2h-5	ave	stdev	2h-1	2h-2	2h-3	2h-4	2h-5	ave	stdev	t-test
C38H73O10P	PG(32:1)	1.88877	1.87055	1.32365	1.78439	1.81471	1.73641	0.234526	1.8408	1.83251	1.96086	2.04408	1.99526	1.9347	0.0943094	0.117503
C38H75O10P	PG(32:0)	0.212218	0.240654	0.274691	0.288035	0.198274	0.242775	0.0386835	0.156952	0.214982	0.169077	0.237484	0.222811	0.200261	0.0352095	0.106684
C40H71O10P	PG(34:4)	0.544539	0.55002	0.417589	0.483393	0.553943	0.509897	0.0591042	0.410608	0.528062	0.462874	0.469149	0.448996	0.463938	0.0424487	0.195569
C40H73O10P	PG(34:3)	0.361187	0.500757	0.324818	0.402321	0.427915	0.4034	0.0671522	0.330649	0.34394	0.402363	0.379624	0.36	0.363315	0.0284786	0.254059
C40H75O10P	PG(34:2)	1.13809	1.27086	1.06714	1.12589	1.10974	1.14235	0.0766884	1.1888	1.17709	1.15743	1.32876	1.27293	1.225	0.072864	0.118746
C40H77O10P	PG(34:1)	0.581721	0.548824	0.465865	0.571429	0.518062	0.53718	0.0467542	0.553219	0.559642	0.561716	0.564015	0.626104	0.572939	0.0299911	0.187961
C40H79O10P	PG(34:0)	0.0659683	0.073336	0.0430462	0.0572229	0.0798258	0.0638799	0.0143737	0.066899	0.0803486	0.034153	0.053412	0.0558233	0.0581272	0.0171248	0.580874
	Total PG	4.81489	5.0833	3.93088	4.7455	4.72464	4.65984	0.431935	4.57317	4.75096	4.77057	5.10882	4.9996	4.84062	0.21312	0.425682

## Sheet: 5_PE
		Normal condition	Normal condition	Normal condition	Normal condition	Normal condition	Normal condition
Compound Formula	Compound Name	0h-1	0h-2	0h-3	0h-4	0h-5	ave	stdev
C39H72O8PN	PE(34:3)	0.32682	0.392802	0.362419	0.294923	0.284356	0.332264	0.0455338
C39H74O8PN	PE(34:2)	0.79063	0.868631	0.816416	0.762435	0.714187	0.79046	0.0578522
C39H76O8PN	PE(34:1)	0.0152767	0.0256903	0.0216069	0.02519	0.0195378	0.0214604	0.00429415
C41H70O8PN	PE(36:6)	0.0231654	0.0570896	0.0439676	0.0342933	0.0311111	0.0379254	0.0130505
C41H72O8PN	PE(36:5)	0.237039	0.275271	0.242827	0.201146	0.210062	0.233269	0.0293266
C41H74O8PN	PE(36:4)	0.36401	0.413528	0.317446	0.348171	0.30576	0.349783	0.0425795
C41H76O8PN	PE(36:3)	0.100676	0.125225	0.0903221	0.0790618	0.0925867	0.0975742	0.0172797
C41H78O8PN	PE(36:2)	0.160029	0.187155	0.159288	0.153759	0.149707	0.161988	0.0146887
C45H86O8PN	PE(40:2)	0.0162784	0.0142724	0.0169589	0.0187055	0.0149333	0.0162297	0.00174464
C47H90O8PN	PE(42:2)	0.0294264	0.0440583	0.0320336	0.0274347	0.0161778	0.0298261	0.0099948
	Total PE	2.09566	2.44815	2.14763	1.97542	1.86493	2.10636	0.22027
		Normal condition	Normal condition	Normal condition	Normal condition	Normal condition	Normal condition		Salt treatment	Salt treatment	Salt treatment	Salt treatment	Salt treatment	Salt treatment
Compound Formula	Compound Name	0.5h-1	0.5h-2	0.5h-3	0.5h-4	0.5h-5	ave	stdev	0.5h-1	0.5h-2	0.5h-3	0.5h-4	0.5h-5	ave	stdev	t-test
C39H72O8PN	PE(34:3)	0.358951	0.307235	0.213254	0.376992	0.313449	0.313976	0.063609	0.190629	0.244809	0.235104	0.26105	0.268242	0.239967	0.0305175	0.0469975
C39H74O8PN	PE(34:2)	0.742661	0.725619	0.569585	0.900674	0.717045	0.731117	0.117477	0.451135	0.580673	0.534428	0.567861	0.642785	0.555376	0.0702516	0.0208005
C39H76O8PN	PE(34:1)	0.0189118	0.0274472	0.024425	0.0425515	0.0328494	0.029237	0.00899021	0.00712516	0.0258549	0.00457834	0.0169899	0.0257662	0.0160629	0.0100334	0.0602362
C41H70O8PN	PE(36:6)	0.0435469	0.0451271	0.0216973	0.0460353	0.0407483	0.039431	0.0101146	0.0156254	0.0293521	0.0290786	0.0279032	0.0230277	0.0249974	0.00582621	0.0244861
C41H72O8PN	PE(36:5)	0.206288	0.205606	0.155353	0.242992	0.219163	0.20588	0.0320428	0.121003	0.159626	0.147002	0.185773	0.174015	0.157484	0.0250944	0.0288526
C41H74O8PN	PE(36:4)	0.364798	0.345191	0.258756	0.399636	0.343164	0.342309	0.051919	0.200255	0.2563	0.252056	0.274319	0.284673	0.253521	0.0325967	0.0119027
C41H76O8PN	PE(36:3)	0.0931903	0.077767	0.0538093	0.118074	0.0939093	0.08735	0.0236534	0.0505011	0.0698206	0.0673139	0.0693239	0.0801614	0.0674242	0.0107004	0.124453
C41H78O8PN	PE(36:2)	0.127281	0.140079	0.138615	0.170206	0.16337	0.14791	0.0180926	0.090377	0.119657	0.10988	0.113845	0.121736	0.111099	0.012498	0.00567894
C45H86O8PN	PE(40:2)	0.00933148	0.0129818	0.008059	0.0205292	0.0119111	0.0125625	0.00486801	0.00812518	0.00874319	0.00928041	0.0111613	0.00497897	0.00845781	0.00225166	0.125397
C47H90O8PN	PE(42:2)	0.0267502	0.0377089	0.0223172	0.0497679	0.0169262	0.0306941	0.0131177	0.00500011	0.023107	0.0173234	0.0161218	0.0155593	0.0154223	0.00655361	0.0482526
	Total PE	2.00764	1.94862	1.47455	2.40267	1.97423	1.96154	0.329472	1.1514	1.53705	1.42399	1.56828	1.66248	1.46864	0.196734	0.0207601
		Normal condition	Normal condition	Normal condition	Normal condition	Normal condition	Normal condition		Salt treatment	Salt treatment	Salt treatment	Salt treatment	Salt treatment	Salt treatment
Compound Formula	Compound Name	1h-1	1h-2	1h-3	1h-4	1h-5	ave	stdev	1h-1	1h-2	1h-3	1h-4	1h-5	ave	stdev	t-test
C39H72O8PN	PE(34:3)	0.364413	0.331257	0.379647	0.385302	0.371928	0.366509	0.0212261	0.429943	0.235562	0.282481	0.239647	0.305556	0.298638	0.0790704	0.100896
C39H74O8PN	PE(34:2)	0.881162	0.800518	0.899824	1.00241	1.01502	0.919786	0.0894581	1.10828	0.640152	0.695116	0.590501	0.788913	0.764594	0.205752	0.160515
C39H76O8PN	PE(34:1)	0.0275169	0.0202505	0.0220319	0.03454	0.0296292	0.0267937	0.00578914	0.0431186	0.0221779	0.0108984	0.0317014	0.0360883	0.0287969	0.0125587	0.75431
C41H70O8PN	PE(36:6)	0.0446221	0.0412509	0.043566	0.0411487	0.0581333	0.0457442	0.00708522	0.0416275	0.0244333	0.0263064	0.0239018	0.0396091	0.0311756	0.00869542	0.0197607
C41H72O8PN	PE(36:5)	0.255709	0.243505	0.249944	0.297767	0.319796	0.273344	0.0335526	0.299842	0.188324	0.189532	0.178383	0.217913	0.214799	0.0497682	0.060762
C41H74O8PN	PE(36:4)	0.445229	0.370258	0.42844	0.470342	0.556579	0.45417	0.0680668	0.527737	0.345449	0.32407	0.280154	0.395714	0.374625	0.0951574	0.166927
C41H76O8PN	PE(36:3)	0.0872609	0.086752	0.12186	0.100877	0.160523	0.111455	0.0309169	0.124758	0.0725481	0.0869365	0.0835306	0.0960679	0.0927682	0.0197639	0.287775
C41H78O8PN	PE(36:2)	0.206749	0.156004	0.192064	0.18679	0.246035	0.197528	0.0328154	0.210995	0.133193	0.150072	0.12366	0.168873	0.157359	0.0345765	0.0962725
C45H86O8PN	PE(40:2)	0.0130148	0.0187504	0.0161817	0.0274325	0.0250036	0.0200766	0.00602459	0.0124261	0.0119034	0.0150323	0.00377397	0.0163466	0.0118965	0.00489624	0.0462374
C47H90O8PN	PE(42:2)	0.0328468	0.0306257	0.0416989	0.0423957	0.048757	0.0392648	0.00744401	0.0391423	0.0250598	0.0206693	0.0251598	0.0352081	0.0290479	0.00776316	0.0663993
	Total PE	2.38183	2.12392	2.42364	2.63738	2.87304	2.48796	0.282195	2.87453	1.72299	1.82341	1.60406	2.1233	2.02966	0.509975	0.116755
		Normal condition	Normal condition	Normal condition	Normal condition	Normal condition	Normal condition		Salt treatment	Salt treatment	Salt treatment	Salt treatment	Salt treatment	Salt treatment
Compound Formula	Compound Name	2h-1	2h-2	2h-3	2h-4	2h-5	ave	stdev	2h-1	2h-2	2h-3	2h-4	2h-5	ave	stdev	t-test
C39H72O8PN	PE(34:3)	0.316261	0.250606	0.293126	0.319037	0.32143	0.300092	0.0298876	0.21688	0.267563	0.190577	0.253113	0.260037	0.237634	0.0327199	0.0135676
C39H74O8PN	PE(34:2)	0.769008	0.507927	0.652661	0.76032	0.714442	0.680872	0.107136	0.554888	0.682816	0.421777	0.623641	0.608299	0.578284	0.0986496	0.15388
C39H76O8PN	PE(34:1)	0.0208346	0.011442	0.0272413	0.0202286	0.0140901	0.0187673	0.00619986	0.0240005	0.0208312	0.0284612	0.0276124	0.0228081	0.0247427	0.00322703	0.0922964
C41H70O8PN	PE(36:6)	0.0349322	0.0335799	0.0326393	0.0449524	0.0352252	0.0362658	0.00496698	0.0275006	0.0243239	0.0194338	0.0230103	0.0269436	0.0242425	0.00326189	0.00193873
C41H72O8PN	PE(36:5)	0.215582	0.158945	0.199351	0.223888	0.211728	0.201899	0.0255875	0.146628	0.179997	0.130144	0.153361	0.143866	0.150799	0.0183791	0.00671523
C41H74O8PN	PE(36:4)	0.359552	0.245258	0.328527	0.372356	0.361938	0.333526	0.0519823	0.259006	0.299621	0.2065	0.291298	0.279086	0.267102	0.037164	0.0485869
C41H76O8PN	PE(36:3)	0.0928199	0.0620607	0.0814728	0.0941503	0.0753567	0.0811721	0.0132595	0.0523762	0.0853208	0.0631913	0.0919168	0.0700534	0.0725717	0.0161165	0.383753
C41H78O8PN	PE(36:2)	0.168174	0.12039	0.140977	0.157708	0.126811	0.142812	0.0201696	0.124128	0.155673	0.0893956	0.132838	0.128828	0.126172	0.0238667	0.267902
C45H86O8PN	PE(40:2)	0.0174661	0.0118152	0.0131813	0.0181058	0.00691923	0.0134975	0.00456044	0.00937521	0.0124738	0.00564208	0.006219	0.0144117	0.00962436	0.00382606	0.183789
C47H90O8PN	PE(42:2)	0.026823	0.0161681	0.0194581	0.0343386	0.0232738	0.0240123	0.00702408	0.0200005	0.0299371	0.0200607	0.0074628	0.0269436	0.0208809	0.00866407	0.54765
	Total PE	2.04366	1.43809	1.81098	2.06981	1.91298	1.8551	0.255366	1.45641	1.77764	1.19248	1.63386	1.59857	1.53179	0.221433	0.0648883

## Sheet: 6_PC
		Normal condition	Normal condition	Normal condition	Normal condition	Normal condition	Normal condition
Compound Formula		0h-1	0h-2	0h-3	0h-4	0h-5	ave	stdev
C40H80O8PN	PC(32:0)	0.0059702	0.00276138	0.00559013	0.00396375	0.00355998	0.00436909	0.00136548
C42H76O8PN	PC(34:4)	0.0091543	0.00867863	0.0079859	0.0079275	0.00711995	0.00817326	0.000778268
C42H78O8PN	PC(34:3)	0.576164	0.575788	0.575224	0.425548	0.473714	0.525288	0.0711339
C42H80O8PN	PC(34:2)	1.05879	0.968929	0.980349	0.837223	0.913411	0.951741	0.0823983
C42H82O8PN	PC(34:1)	0.0465675	0.0646952	0.0535055	0.057078	0.0992838	0.064226	0.0206586
C44H76O8PN	PC(36:6)	0.183006	0.147063	0.176409	0.112491	0.129662	0.149726	0.030065
C44H78O8PN	PC(36:5)	0.541935	0.485845	0.482588	0.398595	0.437719	0.469336	0.0541358
C44H80O8PN	PC(36:4)	0.557378	0.487739	0.473724	0.486114	0.575292	0.516049	0.0466551
C44H82O8PN	PC(36:3)	0.275027	0.313614	0.291885	0.239014	0.269767	0.277861	0.0276477
C44H84O8PN	PC(36:2)	0.405655	0.436772	0.365834	0.3477	0.392072	0.389607	0.0346752
C44H86O8PN	PC(36:1)	0.0370152	0.03432	0.0347387	0.0360701	0.0367864	0.0357861	0.00120815
C46H84O8PN	PC(38:4)	0.0109852	0.0124657	0.00822548	0.00776895	0.00656618	0.00920229	0.00243854
C46H86O8PN	PC(38:3)	0.0322391	0.0268249	0.0279507	0.0182332	0.026502	0.02635	0.00508364
C46H88O8PN	PC(38:2)	0.0285773	0.0287184	0.0278708	0.030838	0.0248407	0.028169	0.00216554
	Total PC	3.79434	3.61788	3.53344	3.02561	3.41489	3.47723	0.287815
		Normal condition	Normal condition	Normal condition	Normal condition	Normal condition	Normal condition		Salt treatment	Salt treatment	Salt treatment	Salt treatment	Salt treatment	Salt treatment
Compound Formula		0.5h-1	0.5h-2	0.5h-3	0.5h-4	0.5h-5	ave	stdev	0.5h-1	0.5h-2	0.5h-3	0.5h-4	0.5h-5	ave	stdev	t-test
C40H80O8PN	PC(32:0)	0.00435021	0.00707369	0.004335	0.00316379	0.00438377	0.00466129	0.00144416	0.00635724	0.00357309	0.00157324	0	0.00514342	0.0033294	0.00258297	0.34369
C42H76O8PN	PC(34:4)	0.00593211	0.00589474	0.00591137	0.00751401	0.0063764	0.00632572	0.000694074	0.00357595	0.00555813	0.00550634	0.00827789	0.00593471	0.0057706	0.00167667	0.513276
C42H78O8PN	PC(34:3)	0.499325	0.481247	0.448318	0.49893	0.469303	0.479425	0.0215051	0.298631	0.413128	0.474568	0.438965	0.440593	0.413177	0.0676501	0.0703663
C42H80O8PN	PC(34:2)	0.961081	0.860318	0.84974	0.927861	0.793941	0.878588	0.0662647	0.583754	0.763926	0.816983	0.70094	0.811157	0.735352	0.0966859	0.0257467
C42H82O8PN	PC(34:1)	0.060903	0.0554105	0.0575373	0.0881907	0.055395	0.0634873	0.0139916	0.048474	0.043671	0.0554567	0.0555801	0.0454995	0.0497363	0.00554988	0.0753469
C44H76O8PN	PC(36:6)	0.141501	0.131964	0.105144	0.142292	0.131035	0.130387	0.0150447	0.0785914	0.10751	0.127747	0.115417	0.107537	0.107361	0.0180848	0.0600419
C44H78O8PN	PC(36:5)	0.447914	0.445092	0.388022	0.460569	0.417893	0.431898	0.0290424	0.305386	0.361517	0.403772	0.338447	0.384411	0.358707	0.0385779	0.00951009
C44H80O8PN	PC(36:4)	0.511902	0.470557	0.427353	0.490151	0.436544	0.467301	0.0355801	0.376825	0.394786	0.439091	0.360443	0.43814	0.401857	0.035688	0.0197746
C44H82O8PN	PC(36:3)	0.269713	0.242863	0.231332	0.312424	0.232739	0.257814	0.0341962	0.152176	0.205254	0.228906	0.205765	0.221958	0.202812	0.0301087	0.0271008
C44H84O8PN	PC(36:2)	0.354424	0.349833	0.34885	0.393971	0.326073	0.35463	0.0245952	0.24086	0.28275	0.333999	0.272067	0.292463	0.284428	0.0338216	0.00559418
C44H86O8PN	PC(36:1)	0.0351972	0.0275088	0.0295568	0.0359881	0.0366643	0.032983	0.00415906	0.0270183	0.0222325	0.0283183	0.021286	0.0383778	0.0274466	0.00681128	0.159445
C46H84O8PN	PC(38:4)	0.0101241	0.00927439	0.00378328	0.00893771	0.00781109	0.00798612	0.00249153	0.004609	0.00698737	0.0088888	0.00693766	0.00973293	0.00743115	0.00198922	0.707262
C46H86O8PN	PC(38:3)	0.0288696	0.0271158	0.0204927	0.0253103	0.0263026	0.0256182	0.00314833	0.0198664	0.0194535	0.0232053	0.021286	0.0217606	0.0211143	0.00151122	0.0203919
C46H88O8PN	PC(38:2)	0.0272086	0.0262512	0.0168671	0.029186	0.0154628	0.0229951	0.00634373	0.0185949	0.017786	0.0219467	0.0152944	0.0169337	0.0181111	0.00246838	0.147302
	Total PC	3.38415	3.15612	2.94906	3.44743	2.97626	3.18261	0.228348	2.17465	2.66044	2.98451	2.57411	2.84993	2.64873	0.309712	0.0146121
		Normal condition	Normal condition	Normal condition	Normal condition	Normal condition	Normal condition		Salt treatment	Salt treatment	Salt treatment	Salt treatment	Salt treatment	Salt treatment
Compound Formula	Compound Name	1h-1	1h-2	1h-3	1h-4	1h-5	ave	stdev	1h-1	1h-2	1h-3	1h-4	1h-5	ave	stdev	t-test
C40H80O8PN	PC(32:0)	0.00590972	0.0043706	0.00316518	0.00475612	0.0047685	0.00459403	0.000984797	0.0177737	0.0051775	0.00597259	0.00879689	0.00759394	0.00906291	0.00506834	0.0889753
C42H76O8PN	PC(34:4)	0.0086676	0.00675457	0.0083086	0.0055488	0.00596063	0.00704804	0.00138999	0.0106642	0.00438096	0.00557442	0.00519816	0.00519586	0.00620272	0.00253186	0.531195
C42H78O8PN	PC(34:3)	0.543143	0.502858	0.557705	0.456429	0.440928	0.500212	0.0514468	0.732906	0.399304	0.456943	0.432487	0.471464	0.498621	0.133792	0.980802
C42H80O8PN	PC(34:2)	1.00394	0.82811	0.90809	0.925937	0.983583	0.929933	0.0693127	1.47529	0.876271	0.815936	0.894163	0.848603	0.982053	0.27731	0.694169
C42H82O8PN	PC(34:1)	0.0606732	0.0647644	0.0731948	0.104635	0.106894	0.0820322	0.0221442	0.123626	0.0764676	0.0776437	0.0671762	0.0631496	0.0816126	0.0242725	0.977917
C44H76O8PN	PC(36:6)	0.143331	0.129052	0.162928	0.117635	0.114365	0.133462	0.0200017	0.184767	0.0959031	0.107427	0.122277	0.130616	0.128198	0.0343342	0.774604
C44H78O8PN	PC(36:5)	0.498229	0.44604	0.501523	0.467526	0.450465	0.472757	0.02605	0.602171	0.38656	0.382087	0.410895	0.431096	0.442562	0.0913824	0.497555
C44H80O8PN	PC(36:4)	0.58719	0.563569	0.501048	0.610923	0.697553	0.592057	0.071769	0.874622	0.490827	0.469605	0.462396	0.455796	0.550649	0.181584	0.648025
C44H82O8PN	PC(36:3)	0.273423	0.262634	0.290801	0.302806	0.339756	0.293884	0.0299524	0.38944	0.238961	0.273943	0.25391	0.257395	0.28273	0.0609354	0.722901
C44H84O8PN	PC(36:2)	0.418881	0.346152	0.373966	0.382947	0.4209	0.388569	0.0316552	0.575155	0.340998	0.355648	0.361552	0.355796	0.39783	0.0994189	0.847629
C44H86O8PN	PC(36:1)	0.0334884	0.0274156	0.0332344	0.0325001	0.0524535	0.0358184	0.00962356	0.0497662	0.026684	0.034641	0.0287898	0.0291767	0.0338116	0.0093907	0.747157
C46H84O8PN	PC(38:4)	0.0108739	0.00580098	0.00933728	0.00895736	0.00739118	0.00847214	0.0019401	0.00813638	0.00501819	0.00581333	0.00823708	0.00743407	0.00692781	0.00144221	0.191012
C46H86O8PN	PC(38:3)	0.0244269	0.0262236	0.0245301	0.0210062	0.0305979	0.0253569	0.00348914	0.0327825	0.0238961	0.0211032	0.0231918	0.0223821	0.0246712	0.00465171	0.798663
C46H88O8PN	PC(38:2)	0.0290758	0.0289254	0.0228684	0.025683	0.026942	0.026699	0.00256764	0.0358633	0.0254096	0.0254034	0.0251111	0.0203038	0.0264182	0.00570857	0.922587
	Total PC	3.66017	3.26174	3.4885	3.48592	3.70282	3.51983	0.174587	5.14061	3.01139	3.05088	3.12417	3.12159	3.48973	0.924118	0.944702
		Normal condition	Normal condition	Normal condition	Normal condition	Normal condition	Normal condition		Salt treatment	Salt treatment	Salt treatment	Salt treatment	Salt treatment	Salt treatment
Compound Formula		2h-1	2h-2	2h-3	2h-4	2h-5	ave	stdev	2h-1	2h-2	2h-3	2h-4	2h-5	ave	stdev	t-test
C40H80O8PN	PC(32:0)	0.00515514	0.00672038	0.00279315	0.00277829	0.00279912	0.00404922	0.00181065	0.00874121	0.00674026	0.0123543	0.00553487	0.00677166	0.00802845	0.00267758	0.0249517
C42H76O8PN	PC(34:4)	0.00753443	0.00513911	0.00518729	0.00674727	0.00639799	0.00620122	0.00103326	0.00556259	0.00674026	0.00557935	0.00434883	0.003585	0.0051632	0.00122206	0.185004
C42H78O8PN	PC(34:3)	0.529631	0.589654	0.509391	0.455877	0.498084	0.516528	0.048961	0.426571	0.403464	0.464122	0.471492	0.414505	0.436031	0.0302492	0.0140671
C42H80O8PN	PC(34:2)	0.960521	0.987579	0.843612	0.85857	0.833419	0.89674	0.0717791	0.792748	0.872348	0.775211	0.798287	0.781609	0.80404	0.0392457	0.0350476
C42H82O8PN	PC(34:1)	0.0824822	0.0727382	0.0634445	0.0952556	0.0631802	0.0754201	0.0136358	0.109265	0.0697815	0.0753212	0.103977	0.0685133	0.0853715	0.0196552	0.379488
C44H76O8PN	PC(36:6)	0.134351	0.160024	0.124016	0.126928	0.134678	0.135999	0.0142086	0.104418	0.1038	0.11071	0.111014	0.0931302	0.104614	0.00725773	0.0022911
C44H78O8PN	PC(36:5)	0.464597	0.47185	0.392877	0.417775	0.430505	0.435521	0.0328777	0.319292	0.373331	0.333804	0.361585	0.339619	0.345526	0.0217457	0.000924069
C44H80O8PN	PC(36:4)	0.535103	0.489955	0.461429	0.524065	0.458416	0.493794	0.0351305	0.417353	0.443826	0.415821	0.429901	0.406857	0.422752	0.014362	0.00305618
C44H82O8PN	PC(36:3)	0.309705	0.290162	0.242605	0.286957	0.272714	0.280429	0.0249228	0.263826	0.237099	0.249477	0.25579	0.240593	0.249357	0.0109295	0.0340112
C44H84O8PN	PC(36:2)	0.408525	0.371676	0.28578	0.37753	0.340373	0.356777	0.0464765	0.279003	0.354934	0.312922	0.349567	0.319941	0.323273	0.0307076	0.215546
C44H86O8PN	PC(36:1)	0.0456032	0.0383457	0.03671	0.0369115	0.0303905	0.0375922	0.00542793	0.0544339	0.0440099	0.0366643	0.0438836	0.0390366	0.0436057	0.00682916	0.161785
C46H84O8PN	PC(38:4)	0.0117379	0.0101201	0.00462865	0.00460402	0.0102368	0.00826548	0.00339175	0.00778762	0.00578869	0.00900666	0.00814417	0.00820566	0.00778656	0.00120246	0.773597
C46H86O8PN	PC(38:3)	0.0277584	0.0284628	0.0219462	0.019448	0.0251921	0.0245615	0.00383489	0.0194691	0.028547	0.015941	0.0185814	0.0207133	0.0206503	0.00474908	0.189826
C46H88O8PN	PC(38:2)	0.0280757	0.0279884	0.0258566	0.0273066	0.0247122	0.0267879	0.00146153	0.0185949	0.0213309	0.0214406	0.0256185	0.0178453	0.0209661	0.00305636	0.00492907
	Total PC	3.571	3.56148	3.03145	3.25822	3.1375	3.31193	0.245652	2.8362	2.98958	2.85272	2.99761	2.78204	2.89163	0.0967244	0.00740273

## Sheet: 7_PI
		Normal condition	Normal condition	Normal condition	Normal condition	Normal condition	Normal condition
Compound Formula		0h-1	0h-2	0h-3	0h-4	0h-5	ave	stdev
C41H73O13P	PI(32:3)	0.0089401	0.00329116	0.00205003	0.00101752	0.0048232	0.0040244	0.00309351
C41H77O13P	PI(32:1)	0.00459777	0.00379749	0.00486883	0.00178066	0.00634632	0.00427821	0.00167308
C43H77O13P	PI(34:3)	0.463148	0.477269	0.51461	0.305307	0.377022	0.427471	0.0848749
C43H79O13P	PI(34:2)	0.560621	0.568307	0.563195	0.424001	0.466276	0.51648	0.0668761
C45H75O13P	PI(36:6)	0.0156835	0.0135191	0.0154778	0.0097682	0.0120326	0.0132962	0.00247747
C45H77O13P	PI(36:5)	0.0217117	0.0177216	0.0230629	0.0124646	0.0187851	0.0187492	0.0041212
C45H79O13P	PI(36:4)	0.020128	0.0151393	0.0168615	0.0141944	0.0200036	0.0172654	0.00272976
C45H81O13P	PI(36:3)	0.0477146	0.063494	0.0529934	0.0391237	0.0504659	0.0507583	0.00883047
C45H83O13P	PI(36:2)	0.0597199	0.075646	0.0642686	0.0584566	0.055543	0.0627268	0.00787666
	Total PI	1.22965	1.25849	1.2782	0.888041	1.03496	1.13787	0.170051
		Normal condition	Normal condition	Normal condition	Normal condition	Normal condition	Normal condition		Salt treatment	Salt treatment	Salt treatment	Salt treatment	Salt treatment	Salt treatment
Compound Formula		0.5h-1	0.5h-2	0.5h-3	0.5h-4	0.5h-5	ave	stdev	0.5h-1	0.5h-2	0.5h-3	0.5h-4	0.5h-5	ave	stdev	t-test
C41H73O13P	PI(32:3)	0.00152281	0.00580067	0.00581704	0.00329943	0.00358064	0.00400412	0.00182668	0.00407987	0.00127394	0.00100965	0.00151785	0.00304696	0.00218565	0.00132194	0.108997
C41H77O13P	PI(32:1)	0.00177661	0.00176542	0.000758744	0.00279182	0.00281336	0.00198119	0.000856214	0.00203993	0.00433139	0.00151448	0.00227677	0.00330087	0.00269269	0.00112277	0.29251
C43H77O13P	PI(34:3)	0.408164	0.427283	0.31063	0.401566	0.364253	0.382379	0.0461677	0.241018	0.303503	0.369836	0.415941	0.340295	0.334119	0.0663586	0.218639
C43H79O13P	PI(34:2)	0.437758	0.498303	0.437492	0.465168	0.409165	0.449577	0.0336757	0.310784	0.349772	0.435362	0.444173	0.423477	0.392714	0.059097	0.0985048
C45H75O13P	PI(36:6)	0.0145682	0.0119544	0.00541237	0.012284	0.00956542	0.0107569	0.00347405	0.00724176	0.00698118	0.00969266	0.0107261	0.00924245	0.00877684	0.00161525	0.281168
C45H77O13P	PI(36:5)	0.0157357	0.0158888	0.0123928	0.0187813	0.0163686	0.0158335	0.00228184	0.00943469	0.0145229	0.0148924	0.0164434	0.0154887	0.0141564	0.00273751	0.323427
C45H79O13P	PI(36:4)	0.0192382	0.0143251	0.0123422	0.0167002	0.0135041	0.015222	0.00275515	0.0111686	0.0103953	0.0123178	0.0123452	0.0126449	0.0117744	0.000954931	0.0295396
C45H81O13P	PI(36:3)	0.0471564	0.0425719	0.0381395	0.048933	0.0380571	0.0429716	0.00501778	0.0282531	0.033581	0.0385687	0.0434611	0.0375284	0.0362785	0.00570266	0.0843044
C45H83O13P	PI(36:2)	0.051471	0.055182	0.0507852	0.0540091	0.0444511	0.0511797	0.0041695	0.0379427	0.0376576	0.0484128	0.0497855	0.0443841	0.0436365	0.00568657	0.0437177
	Total PI	1.00937	1.09053	0.887983	1.0411	0.916132	0.989022	0.0850744	0.661193	0.77914	0.950588	1.01316	0.899615	0.86074	0.140797	0.119369
		Normal condition	Normal condition	Normal condition	Normal condition	Normal condition	Normal condition		Salt treatment	Salt treatment	Salt treatment	Salt treatment	Salt treatment	Salt treatment
Compound Formula	Compound Name	1h-1	1h-2	1h-3	1h-4	1h-5	ave	stdev	1h-1	1h-2	1h-3	1h-4	1h-5	ave	stdev	t-test
C41H73O13P	PI(32:3)	0.00657395	0.00127496	0.00076174	0.00228924	0.000765067	0.00233299	0.00245124	0.00278826	0.00306715	0.000511068	0.000769847	0.00128251	0.00168377	0.00117315	0.607721
C41H77O13P	PI(32:1)	0.00252844	0.00127496	0.00152348	0.00178052	0.00204018	0.00182952	0.000483857	0.0172365	0.00332274	0.00408855	0.00898155	0.000513004	0.00682848	0.00656974	0.128164
C43H77O13P	PI(34:3)	0.387661	0.396308	0.417484	0.367855	0.354277	0.384717	0.0246355	0.537172	0.34306	0.339145	0.39447	0.400451	0.40286	0.0802363	0.641807
C43H79O13P	PI(34:2)	0.471251	0.443889	0.452677	0.441263	0.464854	0.454787	0.0130242	0.677751	0.433695	0.405737	0.468272	0.455496	0.48819	0.10859	0.513932
C45H75O13P	PI(36:6)	0.0114791	0.0110666	0.0125433	0.00951306	0.0103029	0.010981	0.00115228	0.0137892	0.00904809	0.010068	0.0111371	0.00984968	0.0107784	0.00184085	0.839993
C45H77O13P	PI(36:5)	0.0179519	0.0137695	0.0152348	0.0165334	0.0186166	0.0164213	0.00197576	0.0240805	0.0173805	0.0176319	0.0159102	0.0182116	0.0186429	0.00315582	0.218849
C45H79O13P	PI(36:4)	0.0130973	0.0137185	0.0161997	0.0190261	0.0236661	0.0171415	0.00433245	0.020988	0.0168182	0.0145143	0.0168853	0.0173908	0.0173193	0.00233302	0.93759
C45H81O13P	PI(36:3)	0.0404045	0.0407477	0.0385441	0.0490406	0.0547788	0.0447031	0.00693524	0.0612911	0.0364991	0.0372569	0.0461395	0.0476581	0.0457689	0.0100378	0.849999
C45H83O13P	PI(36:2)	0.052541	0.0461025	0.0522554	0.0574344	0.0728853	0.0562437	0.0101344	0.0721907	0.0467229	0.0505446	0.0566608	0.0589442	0.0570126	0.00977167	0.905811
	Total PI	1.02351	0.985542	1.02302	0.98539	1.01754	1.007	0.0197973	1.45471	0.925512	0.894114	1.0339	1.02242	1.06613	0.225449	0.57516
		Normal condition	Normal condition	Normal condition	Normal condition	Normal condition	Normal condition		Salt treatment	Salt treatment	Salt treatment	Salt treatment	Salt treatment	Salt treatment
Compound Formula		2h-1	2h-2	2h-3	2h-4	2h-5	ave	stdev	2h-1	2h-2	2h-3	2h-4	2h-5	ave	stdev	t-test
C41H73O13P	PI(32:3)	0.00279941	0.00253701	0.000768237	0	0.00205301	0.00163153	0.0012009	0.00152995	0.00381677	0.00409216	0.000761163	0.00076691	0.00219339	0.00164065	0.553809
C41H77O13P	PI(32:1)	0.00381738	0.00431291	0.00691413	0.0015283	0.0010265	0.00351985	0.00236758	0.00637479	0.00279896	0.00997464	0.00532814	0.00102255	0.00509982	0.00344092	0.422212
C43H77O13P	PI(34:3)	0.368046	0.401152	0.384938	0.354616	0.383451	0.37844	0.0177396	0.332815	0.366461	0.418986	0.39205	0.364333	0.374929	0.0323717	0.836873
C43H79O13P	PI(34:2)	0.414008	0.446716	0.442197	0.396542	0.446991	0.429291	0.0228561	0.391361	0.428191	0.479755	0.444722	0.46623	0.442052	0.0345504	0.51043
C45H75O13P	PI(36:6)	0.011045	0.0130402	0.0113699	0.0120735	0.0106243	0.0116306	0.000949576	0.00749675	0.0102798	0.00879814	0.00898173	0.0113503	0.00938135	0.00147779	0.021047
C45H77O13P	PI(36:5)	0.0178144	0.0177591	0.0199742	0.0163018	0.0189903	0.018168	0.00138864	0.0137695	0.0167938	0.0184147	0.0142084	0.0158495	0.0158072	0.0019028	0.055342
C45H79O13P	PI(36:4)	0.0124192	0.0159324	0.0148014	0.017015	0.01278	0.0145896	0.00198217	0.0139735	0.0157251	0.0109465	0.0131428	0.013242	0.013406	0.00172086	0.342845
C45H81O13P	PI(36:3)	0.036087	0.0395266	0.0434822	0.0404489	0.0446016	0.0408293	0.00337638	0.0369228	0.0404069	0.034988	0.0446042	0.0395726	0.0392989	0.00366328	0.511565
C45H83O13P	PI(36:2)	0.051611	0.0557634	0.0483477	0.0485998	0.0481944	0.0505033	0.00325949	0.0468674	0.0480404	0.0444511	0.0560216	0.055422	0.0501605	0.0052434	0.90427
	Total PI	0.929659	1.01303	0.98488	0.898638	0.979285	0.961098	0.0460506	0.869266	0.952157	1.04887	0.993064	0.978833	0.968438	0.0657347	0.843066

## Sheet: 8_PS
		Normal condition	Normal condition	Normal condition	Normal condition	Normal condition	Normal condition
Compound Formula		0h-1	0h-2	0h-3	0h-4	0h-5	ave	stdev
C40H72O10PN	PS(34:3)	0.0104299	0.00644697	0.00933837	0.00591945	0.00534989	0.00749692	0.00224688
C40H74O10PN	PS(34:2)	0.012785	0.0126716	0.0150764	0.0132908	0.0216225	0.0150893	0.0037773
C42H76O10PN	PS(36:3)	0.00807475	0.00911468	0.005288	0.0063662	0.00802484	0.00737369	0.00152575
C42H78O10PN	PS(36:2)	0.0257943	0.0238983	0.0230647	0.0234544	0.0234058	0.0239235	0.00108701
C44H80O10PN	PS(38:3)	0.00157009	0.00377926	0.00270025	0.00603114	0.00824775	0.0044657	0.00267988
C44H82O10PN	PS(38:2)	0.0232149	0.0180071	0.0142888	0.021444	0.0303161	0.0214542	0.00601785
C46H84O10PN	PS(40:3)	0.014243	0.0218975	0.0109135	0.00971683	0.0119258	0.0137393	0.00485447
C46H86O10PN	PS(40:2)	0.0348784	0.0423499	0.0310529	0.0224492	0.036892	0.0335245	0.00741336
C48H88O10PN	PS(42:3)	0.0211962	0.0226756	0.0173266	0.0199921	0.0205079	0.0203397	0.00196326
C48H90O10PN	PS(42:2)	0.0456448	0.0796979	0.0536675	0.0460153	0.0598519	0.0569755	0.0140003
	Total PS	0.207701	0.253099	0.198244	0.187189	0.233723	0.215991	0.0269478
		Normal condition	Normal condition	Normal condition	Normal condition	Normal condition	Normal condition		Salt treatment	Salt treatment	Salt treatment	Salt treatment	Salt treatment	Salt treatment
Compound Formula		0.5h-1	0.5h-2	0.5h-3	0.5h-4	0.5h-5	ave	stdev	0.5h-1	0.5h-2	0.5h-3	0.5h-4	0.5h-5	ave	stdev	t-test
C40H72O10PN	PS(34:3)	0.005906	0.0102981	0.00310924	0.012592	0.00539009	0.00745908	0.00387366	0.00425433	0.00257293	0	0.00477604	0.000891862	0.00249903	0.00206758	0.0354811
C40H74O10PN	PS(34:2)	0.0138178	0.0192673	0.00932772	0.0154893	0.00830972	0.0132424	0.00450932	0.0099641	0.00995612	0.0059845	0.0104406	0.0110368	0.00947643	0.00200162	0.126237
C42H76O10PN	PS(36:3)	0.00913758	0.00741904	0.00466386	0.00913758	0.00920807	0.00791322	0.00196706	0.00470216	0.00413906	0.00631697	0.00299891	0.00691193	0.00501381	0.00159869	0.0337661
C42H78O10PN	PS(36:2)	0.0228439	0.024361	0.0161014	0.0206153	0.0123523	0.0192548	0.00495971	0.012875	0.0162206	0.0116365	0.0133285	0.0156076	0.0139336	0.00192329	0.0557087
C44H80O10PN	PS(38:3)	0.00267441	0.00874782	0.00544117	0.0104748	0.00606385	0.00668041	0.00302636	0.00324673	0.00492213	0.00155154	0.00322105	0.00434783	0.00345785	0.0012914	0.0599229
C44H82O10PN	PS(38:2)	0.020281	0.0195995	0.0157683	0.0264098	0.0120154	0.0188148	0.0053843	0.00918041	0.0214784	0.0173994	0.0213256	0.0108138	0.0160395	0.00578204	0.454817
C46H84O10PN	PS(40:3)	0.0113663	0.00908001	0.00410864	0.0113663	0.00640073	0.00846438	0.00318009	0.00862062	0.00693573	0.00908757	0.00799709	0.00802676	0.00813356	0.000808117	0.827281
C46H86O10PN	PS(40:2)	0.0402276	0.0355449	0.0145468	0.0496995	0.0208866	0.0321811	0.0143308	0.0219434	0.0280785	0.0261545	0.0334323	0.0179487	0.0255115	0.00590907	0.364177
C48H88O10PN	PS(42:3)	0.021061	0.016499	0.0109934	0.0255184	0.0128015	0.0173747	0.0059647	0.00884454	0.00827812	0.0131881	0.0182156	0.0104794	0.0118011	0.00406107	0.122417
C48H90O10PN	PS(42:2)	0.0542683	0.0494971	0.0235414	0.063183	0.0389659	0.0458911	0.0152452	0.0315716	0.032665	0.0462136	0.0440951	0.0303233	0.0369737	0.00755091	0.274892
	Total PS	0.205373	0.205186	0.114042	0.251395	0.137223	0.182644	0.0559479	0.117218	0.140169	0.142852	0.167161	0.120624	0.137605	0.0200727	0.128655
		Normal condition	Normal condition	Normal condition	Normal condition	Normal condition	Normal condition		Salt treatment	Salt treatment	Salt treatment	Salt treatment	Salt treatment	Salt treatment
Compound Formula		2h-1	2h-2	2h-3	2h-4	2h-5	ave	stdev	2h-1	2h-2	2h-3	2h-4	2h-5	ave	stdev	t-test
C40H72O10PN	PS(34:3)	0.00865904	0.0053739	0.00702341	0.0109445	0.00649424	0.00769902	0.00216616	0.00868077	0.00370331	0.0020195	0.00371809	0.00822121	0.00526857	0.00299047	0.179294
C40H74O10PN	PS(34:2)	0.0198714	0.00940432	0.0182832	0.0183153	0.0144441	0.0160637	0.00422685	0.0204777	0.0122321	0.0111072	0.015661	0.0179065	0.0154769	0.00389125	0.825095
C42H76O10PN	PS(36:3)	0.00688283	0.00694128	0.0113712	0.00692408	0.01478	0.00937989	0.00358259	0.00856947	0.00639662	0.00639508	0.00473211	0.00867169	0.00695299	0.00166734	0.206913
C42H78O10PN	PS(36:2)	0.0288635	0.0173532	0.0217391	0.0173102	0.0212742	0.0213081	0.00471421	0.0255971	0.015711	0.0134633	0.0219705	0.0191453	0.0191775	0.00483948	0.500717
C44H80O10PN	PS(38:3)	0.00488459	0.00548585	0.00602007	0.00435547	0.00380697	0.00491059	0.000878733	0.00656622	0.00605996	0.00493655	0.00383076	0.00382906	0.00504451	0.00125588	0.849978
C44H82O10PN	PS(38:2)	0.0268652	0.0119793	0.0180602	0.0192088	0.022058	0.0196343	0.00546394	0.0247068	0.0198632	0.00583411	0.0210692	0.0188074	0.0180561	0.00718536	0.706052
C46H84O10PN	PS(40:3)	0.0113234	0.0136587	0.00914159	0.0136248	0.0119807	0.0119458	0.00187118	0.0119082	0.0103244	0.00751702	0.00754884	0.0109241	0.00964451	0.00200885	0.0977388
C46H86O10PN	PS(40:2)	0.0400758	0.028101	0.0329989	0.0408744	0.0359422	0.0355985	0.00526713	0.0346118	0.0276065	0.0203072	0.0316601	0.0434711	0.0315313	0.00856518	0.392172
C48H88O10PN	PS(42:3)	0.0176511	0.017801	0.0199554	0.012173	0.0172433	0.0169648	0.00287894	0.02326	0.011671	0.00549752	0.0145343	0.0139648	0.0137855	0.00639376	0.340342
C48H90O10PN	PS(42:2)	0.0529534	0.0394086	0.0414716	0.0515956	0.0483709	0.04676	0.00604869	0.0558685	0.045113	0.0439802	0.0430397	0.0486516	0.0473306	0.00522485	0.877132
	Total PS	0.225801	0.160993	0.196879	0.20024	0.203673	0.197517	0.0233437	0.233824	0.165302	0.130594	0.174975	0.20249	0.181437	0.0389702	0.451473
		Normal condition	Normal condition	Normal condition	Normal condition	Normal condition	Normal condition		Salt treatment	Salt treatment	Salt treatment	Salt treatment	Salt treatment	Salt treatment
Compound Formula		2h-1	2h-2	2h-3	2h-4	2h-5	ave	stdev	2h-1	2h-2	2h-3	2h-4	2h-5	ave	stdev	t-test
C40H72O10PN	PS(34:3)	0.00312863	0.00757448	0.00652115	0.00536809	0.00484497	0.00548747	0.00168933	0.00649346	0.00368673	0.00988183	0.00256216	0.00650989	0.00582681	0.00285447	0.824788
C40H74O10PN	PS(34:2)	0.0160901	0.0110276	0.00719575	0.0144267	0.0117181	0.0120916	0.00341621	0.0105239	0.00770861	0.0111171	0.0154844	0.0172849	0.0124238	0.00389061	0.889497
C42H76O10PN	PS(36:3)	0.00581032	0.00245057	0.00921955	0.00637461	0.00867589	0.00650619	0.00269349	0.00750106	0.00357501	0.00640073	0.00857767	0.00695884	0.00660266	0.00187364	0.94919
C42H78O10PN	PS(36:2)	0.0150845	0.0116959	0.0146164	0.0139794	0.0197179	0.0150188	0.0029313	0.017913	0.0128477	0.0134752	0.0178237	0.0185195	0.0161158	0.00271928	0.556583
C44H80O10PN	PS(38:3)	0.00491642	0.0021164	0.00438491	0.00659828	0.00833786	0.00527077	0.00234679	0.00604563	0.00379844	0.00887119	0.00267356	0.00493853	0.00526547	0.00237628	0.997255
C44H82O10PN	PS(38:2)	0.00860374	0.0102478	0.0142791	0.00972966	0.0221967	0.0130114	0.00556355	0.0108597	0.0108367	0.0153842	0.0158186	0.0170604	0.0139919	0.00293497	0.736416
C46H84O10PN	PS(40:3)	0.00860374	0.00690615	0.0103439	0.00972966	0.010366	0.00918989	0.00146333	0.00750106	0.00748517	0.00415486	0.00969166	0.00864244	0.00749504	0.00207958	0.174456
C46H86O10PN	PS(40:2)	0.0202244	0.0218323	0.0349668	0.0398133	0.0316613	0.0296996	0.00844917	0.0314597	0.0191039	0.0220095	0.0184921	0.0377124	0.0257555	0.00846372	0.481918
C48H88O10PN	PS(42:3)	0.0160901	0.0121415	0.0167526	0.0149859	0.0218587	0.0163658	0.00354073	0.0211597	0.0166461	0.0217849	0.0132564	0.0228968	0.0191488	0.00406278	0.28152
C48H90O10PN	PS(42:2)	0.0326272	0.0302979	0.0384523	0.0432802	0.0537454	0.0396806	0.00935509	0.0416477	0.0309462	0.0462649	0.052023	0.0597114	0.0461186	0.0108379	0.344093
	Total PS	0.139448	0.118518	0.165502	0.171108	0.204841	0.159883	0.0328155	0.164464	0.121997	0.168103	0.161862	0.206745	0.164634	0.0300458	0.817295

## Sheet: 9_PA
		Normal condition	Normal condition	Normal condition	Normal condition	Normal condition	Normal condition
Compound Formula		0h-1	0h-2	0h-3	0h-4	0h-5	ave	stdev
C37H67O8P	PA(34:3)	0.367865	0.394818	0.387983	0.184188	0.236466	0.314264	0.0971713
C37H69O8P	PA(34:2)	0.760265	0.951363	0.756888	0.482444	0.619947	0.714181	0.175203
C37H71O8P	PA(34:1)	0.0355671	0.0496401	0.0604403	0.0260234	0.0627594	0.0468861	0.0158638
C39H65O8P	PA(36:6)	0.0492133	0.0861867	0.0690331	0.0280474	0.0258251	0.0516611	0.0261003
C39H67O8P	PA(36:5)	0.225307	0.278704	0.253704	0.131852	0.171975	0.212308	0.0599811
C39H69O8P	PA(36:4)	0.355816	0.436113	0.315455	0.198211	0.214392	0.303997	0.0993616
C39H71O8P	PA(36:3)	0.11425	0.214675	0.193263	0.0920938	0.114987	0.145854	0.0543732
C39H73O8P	PA(36:2)	0.195111	0.265323	0.21176	0.137924	0.162886	0.194601	0.0487708
	Total PA	2.13315	2.70416	2.25508	1.29235	1.61645	2.00024	0.553741
		Normal condition	Normal condition	Normal condition	Normal condition	Normal condition	Normal condition		Salt treatment	Salt treatment	Salt treatment	Salt treatment	Salt treatment	Salt treatment
Compound Formula		0.5h-1	0.5h-2	0.5h-3	0.5h-4	0.5h-5	ave	stdev	0.5h-1	0.5h-2	0.5h-3	0.5h-4	0.5h-5	ave	stdev	t-test
C37H67O8P	PA(34:3)	0.312148	0.285097	0.19247	0.284741	0.18664	0.252219	0.0583109	0.178833	0.220684	0.187784	0.358576	0.1889	0.226956	0.075269	0.569365
C37H69O8P	PA(34:2)	0.74676	0.737755	0.485415	0.643624	0.344064	0.591524	0.173704	0.475633	0.41733	0.461499	0.717728	0.438266	0.502091	0.122582	0.374431
C37H71O8P	PA(34:1)	0.050486	0.0236506	0.0201238	0.0432737	0.00654113	0.028815	0.0178677	0.0289844	0.025341	0.0100419	0.0603858	0.0418496	0.0333205	0.0189053	0.708639
C39H65O8P	PA(36:6)	0.0582753	0.0450078	0.0350729	0.0308686	0.0318335	0.0402116	0.0115455	0.0237672	0.0259202	0.0220923	0.0451455	0.0308821	0.0295615	0.00931704	0.14712
C39H67O8P	PA(36:5)	0.250555	0.233926	0.138279	0.166892	0.104949	0.17892	0.0620993	0.142313	0.121926	0.135136	0.2483	0.133053	0.156146	0.0520324	0.547149
C39H69O8P	PA(36:4)	0.300175	0.373536	0.188445	0.275654	0.1644	0.260442	0.0851586	0.218977	0.199253	0.194527	0.326514	0.221659	0.232186	0.0540509	0.548494
C39H71O8P	PA(36:3)	0.143813	0.162974	0.0958755	0.114243	0.086779	0.120737	0.0321321	0.103909	0.0951374	0.0899471	0.160597	0.0890386	0.107726	0.0301402	0.527565
C39H73O8P	PA(36:2)	0.2018	0.191212	0.12563	0.157805	0.0783482	0.150959	0.0504128	0.143328	0.122216	0.111752	0.210488	0.116746	0.140906	0.0407136	0.737617
	Total PA	2.08998	2.06678	1.2849	1.72864	1.0101	1.63608	0.478348	1.32299	1.23215	1.21852	2.1529	1.26833	1.43898	0.401133	0.500238
		Normal condition	Normal condition	Normal condition	Normal condition	Normal condition	Normal condition		Salt treatment	Salt treatment	Salt treatment	Salt treatment	Salt treatment	Salt treatment
Compound Formula		2h-1	2h-2	2h-3	2h-4	2h-5	ave	stdev	2h-1	2h-2	2h-3	2h-4	2h-5	ave	stdev	t-test
C37H67O8P	PA(34:3)	0.313844	0.272308	0.308677	0.161043	0.170883	0.245351	0.0742991	0.329758	0.2715	0.141454	0.282064	0.34754	0.274463	0.0808636	0.569695
C37H69O8P	PA(34:2)	0.66778	0.580702	0.622982	0.425304	0.556856	0.570725	0.0916376	0.779663	0.699742	0.384424	0.84765	0.712428	0.684781	0.177997	0.238455
C37H71O8P	PA(34:1)	0.0150886	0.0144922	0.0129878	0.0260213	0.0340607	0.0205301	0.00916764	0.0273718	0.026874	0.0326768	0.0401073	0.0502942	0.0354648	0.00985565	0.0380523
C39H65O8P	PA(36:6)	0.0487148	0.0266656	0.0489207	0.020817	0.0179725	0.0326181	0.0151168	0.0337105	0.040529	0.0216393	0.0508999	0.0545218	0.0402601	0.0132882	0.420555
C39H67O8P	PA(36:5)	0.178477	0.170573	0.200878	0.131841	0.17784	0.171922	0.0251234	0.224304	0.194219	0.100499	0.232914	0.231353	0.196658	0.05598	0.393682
C39H69O8P	PA(36:4)	0.270302	0.245063	0.238976	0.20181	0.22625	0.23648	0.0251522	0.280344	0.351687	0.149006	0.402678	0.333254	0.303394	0.0967574	0.172858
C39H71O8P	PA(36:3)	0.122434	0.119126	0.125837	0.113771	0.123488	0.120931	0.00467431	0.160917	0.152093	0.0888808	0.153429	0.178872	0.146838	0.034112	0.13097
C39H73O8P	PA(36:2)	0.196009	0.154921	0.150659	0.117674	0.189001	0.161653	0.0317354	0.174171	0.173447	0.0949805	0.284252	0.216338	0.188637	0.0691395	0.450564
	Total PA	1.82486	1.58675	1.72002	1.20045	1.5007	1.56656	0.239297	2.02032	1.9297	1.02082	2.31368	2.12679	1.88226	0.502321	0.240199
		Normal condition	Normal condition	Normal condition	Normal condition	Normal condition	Normal condition		Salt treatment	Salt treatment	Salt treatment	Salt treatment	Salt treatment	Salt treatment
Compound Formula		2h-1	2h-2	2h-3	2h-4	2h-5	ave	stdev	2h-1	2h-2	2h-3	2h-4	2h-5	ave	stdev	t-test
C37H67O8P	PA(34:3)	0.174144	0.160626	0.210887	0.187326	0.21863	0.190323	0.0243765	0.236802	0.177008	0.374153	0.254368	0.344915	0.277449	0.0808957	0.0500092
C37H69O8P	PA(34:2)	0.455175	0.335526	0.584633	0.361479	0.596821	0.466727	0.121707	0.552442	0.410995	0.735078	0.574924	0.88655	0.631998	0.182928	0.131078
C37H71O8P	PA(34:1)	0.0354363	0.0216282	0.0327464	0.0318483	0.0284409	0.03002	0.00531573	0.0521718	0.0419383	0.0523291	0.0591219	0.0457659	0.0502654	0.00663169	0.000705593
C39H65O8P	PA(36:6)	0.0258902	0.0171584	0.0282347	0.0193985	0.0333998	0.0248163	0.00660514	0.029564	0.0323937	0.0536373	0.0359057	0.0507057	0.0404413	0.0109902	0.0260543
C39H67O8P	PA(36:5)	0.102259	0.090406	0.121089	0.112483	0.138121	0.112871	0.0181833	0.126372	0.0971811	0.177628	0.137999	0.221855	0.152207	0.0484621	0.12769
C39H69O8P	PA(36:4)	0.174433	0.121262	0.238103	0.163729	0.23059	0.185624	0.048793	0.233469	0.195375	0.229812	0.223654	0.319053	0.240272	0.0465139	0.107441
C39H71O8P	PA(36:3)	0.0906879	0.0774291	0.107991	0.0676053	0.122806	0.0933038	0.0223906	0.12927	0.0979042	0.164546	0.143046	0.197156	0.146385	0.0372894	0.0258919
C39H73O8P	PA(36:2)	0.113396	0.083485	0.13084	0.0997432	0.127474	0.110988	0.0197139	0.144052	0.115547	0.204083	0.126031	0.206164	0.159176	0.0431723	0.0528619
	Total PA	1.17504	0.907521	1.46835	1.05013	1.50722	1.22165	0.261095	1.51791	1.1734	2.00362	1.55793	2.28815	1.7082	0.438295	0.0655321

## Sheet: 10_LysoPC
		Normal condition	Normal condition	Normal condition	Normal condition	Normal condition	Normal condition
Compound Formula		0h-1	0h-2	0h-4	0h-5	0h-6	ave	stdev
C24H50O7PN	LPC(16:0)	0.006279	0.00704216	0.00920018	0.00748733	0.0103456	0.00807085	0.00166277
C26H48O7PN	LPC(18:3)	0.00983159	0.0146575	0.0119354	0.0114367	0.00812866	0.011198	0.00244218
C26H50O7PN	LPC(18:2)	0.0210677	0.02866	0.0240365	0.0185126	0.0242218	0.0232997	0.00380866
	Total LysoPC	0.0437051	0.0568286	0.0546209	0.0418797	0.0483614	0.0490791	0.0065573
		Normal condition	Normal condition	Normal condition	Normal condition	Normal condition	Normal condition		Salt treatment	Salt treatment	Salt treatment	Salt treatment	Salt treatment	Salt treatment
Compound Formula		0.5h-1	0.5h-2	0.5h-3	0.5h-4	0.5h-5	ave	stdev	0.5h-1	0.5h-2	0.5h-3	0.5h-4	0.5h-5	ave	stdev	t-test
C24H50O7PN	LPC(16:0)	0.00459711	0.00293667	0.00335398	0.00459711	0.00463258	0.00402349	0.000815246	0.001732	0.00955957	0.00334733	0.00785508	0.00500977	0.00550075	0.00320541	0.347173
C26H48O7PN	LPC(18:3)	0.00812704	0.00807584	0.0162791	0.0151048	0.00818974	0.0111553	0.00416231	0.00239181	0.0110429	0.00971541	0.00891879	0.0118263	0.00877906	0.00374514	0.370421
C26H50O7PN	LPC(18:2)	0.0176496	0.0269195	0.0241323	0.0151869	0.0136496	0.0195076	0.00576109	0.0123714	0.016482	0.0114299	0.0155465	0.0114978	0.0134655	0.0023792	0.0620554
	Total LysoPC	0.0356276	0.0409502	0.0461376	0.0438368	0.030939	0.0394983	0.0061898	0.0170725	0.044007	0.0289013	0.0353479	0.0340007	0.0318659	0.00989595	0.181847
		Normal condition	Normal condition	Normal condition	Normal condition	Normal condition	Normal condition		Salt treatment	Salt treatment	Salt treatment	Salt treatment	Salt treatment	Salt treatment
Compound Formula		2h-1	2h-2	2h-3	2h-4	2h-5	ave	stdev	2h-1	2h-2	2h-3	2h-4	2h-5	ave	stdev	t-test
C24H50O7PN	LPC(16:0)	0.000899597	0.00833008	0.00706295	0.00542994	0.00791866	0.00592824	0.00302298	0.0156595	0.0116567	0.0116539	0.00962817	0.00672014	0.0110637	0.00326911	0.0326679
C26H48O7PN	LPC(18:3)	0.00686965	0.00940227	0.0114157	0.00896762	0.00816611	0.00896427	0.00167525	0.0146756	0.00942455	0.0114886	0.0156873	0.00738385	0.011732	0.00348565	0.148206
C26H50O7PN	LPC(18:2)	0.0171741	0.0181447	0.013551	0.016043	0.0210339	0.0171894	0.00274979	0.0282854	0.0305884	0.0165303	0.0356906	0.0215708	0.0265331	0.00755077	0.031618
	Total LysoPC	0.0305863	0.0403308	0.0344114	0.0394082	0.0481718	0.0385817	0.00665265	0.0671471	0.0582007	0.0412431	0.0696382	0.0383297	0.0549118	0.0144844	0.0511913
		Normal condition	Normal condition	Normal condition	Normal condition	Normal condition	Normal condition		Salt treatment	Salt treatment	Salt treatment	Salt treatment	Salt treatment	Salt treatment
Compound Formula		2h-1	2h-2	2h-3	2h-4	2h-5	ave	stdev	2h-1	2h-2	2h-3	2h-4	2h-5	ave	stdev	t-test
C24H50O7PN	LPC(16:0)	0.00831377	0.00418499	0.0029818	0.0116166	0.0034032	0.00610006	0.00374154	0.00626818	0.00872394	0.0104233	0.00951956	0.0128988	0.00956676	0.0024202	0.120117
C26H48O7PN	LPC(18:3)	0.010207	0.00730322	0.00778581	0.00733244	0.00489728	0.00750515	0.00188748	0.0106394	0.0126744	0.0168758	0.0118174	0.0135603	0.0131135	0.00236371	0.00322732
C26H50O7PN	LPC(18:2)	0.014405	0.0135397	0.0128383	0.0115342	0.0120357	0.0128706	0.0011496	0.0210314	0.0242789	0.0210948	0.0192853	0.0297665	0.0230914	0.00414378	0.000715659
	Total LysoPC	0.0353129	0.0298693	0.0270847	0.0341082	0.0229923	0.0298735	0.00506577	0.0452794	0.0575286	0.0536883	0.0425918	0.0601118	0.05184	0.00762841	0.0006745
