# Supplementary material for: Galactolipid and Phospholipid Profile and Proteome Alterations in Soybean Leaves at the Onset of Salt Stress
Source: Front Plant Sci. 2021 Mar 17;12:644408. doi: 10.3389/fpls.2021.644408 (PMC8010258; doi:10.3389/fpls.2021.644408)
Supplement: Supplementary file 4 [file Table_5.xlsx]

## Sheet: DEPs 0.5h
Supplementary Table S5
Differentially expressed proteins identified by Orbitrap LC-MS/MS at 0.5, 1 and 2 h of salt treatment
Checked	Protein FDR Confidence: Combined	Master	Accession	Description	Exp. q-value: Combined	Sum PEP Score	Coverage [%]	# Peptides	# PSMs	# Protein Unique Peptides	# Unique Peptides	# AAs	MW [kDa]	calc. pI	Score Sequest HT: Sequest HT	# Peptides (by Search Engine): Sequest HT	Abundance Ratio: (0_5h) / (0h)	Abundance Ratio: (1h) / (0h)	Abundance Ratio: (2h) / (0h)	Abundance Ratio Adj. P-Value: (0_5h) / (0h)	Abundance Ratio Adj. P-Value: (1h) / (0h)	Abundance Ratio Adj. P-Value: (2h) / (0h)	Abundances (Grouped): 0_5h	Abundances (Grouped): 0h	Abundances (Grouped): 1h	Abundances (Grouped): 2h	Abundances (Grouped) CV [%]: 0_5h	Abundances (Grouped) CV [%]: 0h	Abundances (Grouped) CV [%]: 1h	Abundances (Grouped) CV [%]: 2h	Abundances (Normalized): F1: Sample, 0_5h	Abundances (Normalized): F2: Sample, 0_5h	Abundances (Normalized): F8: Sample, 0_5h	Abundances (Normalized): F3: Sample, 0h	Abundances (Normalized): F4: Sample, 0h	Abundances (Normalized): F7: Sample, 0h	Abundances (Normalized): F5: Sample, 1h	Abundances (Normalized): F6: Sample, 1h	Abundances (Normalized): F9: Sample, 1h	Abundances (Normalized): F10: Sample, 2h	Abundances (Normalized): F11: Sample, 2h	Abundances (Normalized): F12: Sample, 2h	Found in Sample: [S1] F1: Sample, 0_5h	Found in Sample: [S2] F2: Sample, 0_5h	Found in Sample: [S8] F8: Sample, 0_5h	Found in Sample: [S3] F3: Sample, 0h	Found in Sample: [S4] F4: Sample, 0h	Found in Sample: [S7] F7: Sample, 0h	Found in Sample: [S5] F5: Sample, 1h
FALSE	High	Master Protein	Glyma.17G008500.1.p	NA	0	47.614	41	4	11	3	3	118	13.1	3.95	38.54	4	100	42.351	17.11	0.00662436	0.00991185	0.0338679	254.7	2.4	101.8	41.1	7.39	81.69	11.92	41.3	6.6172e+07	6.44172e+07	5.74232e+07	87023.9	1.01756e+06	608089	2.57533e+07	2.33407e+07	2.95405e+07	4.86852e+06	1.20464e+07	1.04045e+07	Not Found	Not Found	High	Peak Found	Peak Found	Peak Found	Peak Found
FALSE	High	Master Protein	Glyma.06G157100.1.p	K11097 - small nuclear ribonucleoprotein E (SNRPE, SME) (1 of 4)	0	9.923	26	2	4	0	2	88	10.3	9.99	9.89	2	61.332	8.994	5.575	0.0305634	0.687813	0.476435	319	5.2	46.8	29	3.01	37.2	81.73	5.1	1.64938e+08	1.5758e+08	1.66894e+08	2.56395e+06	2.68926e+06	4.77841e+06	2.22966e+06	2.4188e+07	3.52047e+07	1.49932e+07	1.39944e+07	1.54781e+07	High	Peak Found	Peak Found	Peak Found	High	Peak Found	Peak Found
FALSE	High	Master Protein	Glyma.18G070500.1.p	PTHR33791:SF4 - CHAPERONIN-LIKE RBCX PROTEIN (1 of 3)	0	28.042	29	5	11	1	2	220	25.2	8.85	27.78	5	23.981	3.028	2.491	0.0437965	1	0.925361	314.5	13.1	39.7	32.7	12.78	53.29	84.88	6.69	1.30472e+08	1.49027e+08	1.68641e+08	6.21434e+06	4.52793e+06	1.2312e+07	3.82974e+06	1.88158e+07	3.81282e+07	1.4757e+07	1.68242e+07	1.54781e+07	High	High	High	High	High	Peak Found	Peak Found
FALSE	High	Master Protein	Glyma.19G223000.1.p	K19355 - mannan endo-1,4-beta-mannosidase (MAN) (1 of 20)	0	30.007	14	4	16	1	4	410	46.2	8	37.88	4	23.78	5.389	6.263	0.000800998	0.00884838	0.00433586	261.1	11	59.2	68.8	26.93	33.13	13.51	14.4	4.53786e+07	2.61229e+07	4.10648e+07	2.89503e+06	1.66207e+06	1.72688e+06	9.30575e+06	7.58432e+06	9.91044e+06	8.8149e+06	1.17678e+07	1.08151e+07	High	High	Peak Found	High	High	Not Found	High
FALSE	High	Master Protein	Glyma.10G058100.1.p	1.1.1.41 - Isocitrate dehydrogenase (NAD(+)) / Nicotinamide adenine dinucleotide isocitrate dehydrogenase (1 of 6)	0	123.897	42	13	87	1	3	359	39.4	7.49	261.56	13	23.141	15.208	7.861	0.00096361	0.00135581	0.00356161	196.1	8.5	128.9	66.6	22.18	35.3	14.02	30.95	2.01492e+07	2.19092e+07	1.40116e+07	736262	870728	1.40659e+06	1.46957e+07	1.10739e+07	1.32423e+07	5.05035e+06	6.84483e+06	9.42609e+06	High	High	Peak Found	High	High	Peak Found	High
FALSE	High	Master Protein	Glyma.17G233000.1.p	PTHR11864:SF0 - PRP40 PRE-MRNA PROCESSING FACTOR 40 HOMOLOG A (YEAST) (1 of 2)	0	5.656	2	2	2	0	2	1008	115.1	6.37	3.64	2	18.32	12.17	15.169	0.000800998	0.00135581	0.000484036	157.1	8.6	104.3	130	21.01	9.92	35.93	17.13	34987657	2.27812e+07	2.95587e+07	1.61346e+06	1.41841e+06	1.73003e+06	1.09732e+07	2.37144e+07	1.9636e+07	3.11055e+07	2.26121e+07	2.44741e+07	Peak Found	Peak Found	High	Peak Found	Not Found	Not Found	Not Found
FALSE	High	Master Protein	Glyma.02G087800.1.p	PTHR12599//PTHR12599:SF8 - PTERIN-4-ALPHA-CARBINOLAMINE DEHYDRATASE // SUBFAMILY NOT NAMED (1 of 2)	0	21.149	30	5	25	3	3	215	23.5	7.8	58.97	5	13.477	8.604	17.887	0.000879562	0.00135581	0.000275545	131.6	9.8	84	174.6	14.27	6.55	42.78	19.33	5.18073e+07	3.9426e+07	4.29389e+07	3.24227e+06	2.86607e+06	3.18616e+06	2.74127e+07	21798044	4.81605e+07	5.51263e+07	5.69899e+07	7.7113e+07	High	High	Peak Found	High	High	Not Found	Peak Found
FALSE	High	Master Protein	Glyma.15G265300.1.p	K09291 - nucleoprotein TPR (TPR, MLP1, MLP2) (1 of 2)	0	24.693	4	6	11	0	6	2084	234.2	5.06	22.3	6	12.825	4.97	6.602	0.0209022	0.0728412	0.0459243	202	15.7	78.3	104	21.89	63	42.48	17.16	2.11212e+07	1.4637e+07	2.26748e+07	1.64686e+06	1.52152e+06	4.2977e+06	8.18435e+06	6.69582e+06	1.45405e+07	8.77014e+06	1.08728e+07	1.24242e+07	High	High	High	Peak Found	Peak Found	Peak Found	Peak Found
FALSE	High	Master Protein	Glyma.04G198900.1.p	K17780 - mitochondrial import inner membrane translocase subunit TIM8 (TIM8) (1 of 2)	0	13.765	35	3	10	0	3	78	9	5.33	17.21	3	12.824	4.719	8.764	0.000180856	0.000679396	0.00012473	187.9	14.6	69.1	128.4	0.99	3.76	27.89	10.24	8.46517e+07	8.4963e+07	8.33881e+07	6.60092e+06	6.80074e+06	6.30936e+06	4.49715e+07	2.66396e+07	3.1147e+07	6.15862e+07	5.78477e+07	5.02197e+07	Peak Found	Peak Found	High	Peak Found	Peak Found	Peak Found	Not Found
FALSE	High	Master Protein	Glyma.09G230800.1.p	K13095 - splicing factor 1 (SF1) (1 of 4)	0	11.993	6	3	3	0	3	780	83.8	6.15	4.8	3	12.631	8.001	8.443	0.0116191	0.0248834	0.0120769	168	13.3	106.4	112.3	21.71	29.79	57.5	13.57	1.45328e+07	2.20658e+07	1.68046e+07	1.78851e+06	977237	1.33037e+06	1.62079e+07	4.28255e+06	1.06444e+07	1.40682e+07	1.11886e+07	1.12322e+07	Not Found	Not Found	Peak Found	Peak Found	Peak Found	High	Not Found
FALSE	High	Master Protein	Glyma.13G062700.1.p	K00703 - starch synthase (E2.4.1.21, glgA) (1 of 4)	0	54.786	18	10	37	4	4	776	86.5	5.9	101.11	10	12.118	35.816	8.507	0.023065	0.00410763	0.0260512	84.4	7	249.4	59.2	48.48	53.56	33.9	17.36	6.24449e+07	3.30952e+07	9.44888e+07	5.1531e+06	3.28701e+06	9.53984e+06	1.87574e+08	9.47392e+07	1.84565e+08	5.01816e+07	4.38389e+07	3.52697e+07	High	High	High	High	High	Peak Found	High
FALSE	High	Master Protein	Glyma.06G128900.2.p	PF01535//PF12854//PF13041 - PPR repeat (PPR) // PPR repeat (PPR_1) // PPR repeat family (PPR_2) (1 of 52)	0	8.772	6	3	3	0	3	632	71.4	5.73	1.72	3	11.841	13.389	3.029	0.00450573	0.00356576	0.0653762	161.9	13.7	183	41.4	10.44	20.28	45.54	18.32	1.41814e+07	1.58514e+07	1.74872e+07	1.33873e+06	1.64914e+06	1.09806e+06	1.79237e+07	8.18088e+06	2.27307e+07	3.55263e+06	5.07204e+06	4.05488e+06	Peak Found	Peak Found	High	Peak Found	Peak Found	Not Found	Peak Found
FALSE	High	Master Protein	Glyma.11G126000.2.p	PF06075 - Plant protein of unknown function (DUF936) (DUF936) (1 of 14)	0.001	3.244	2	2	3	1	2	742	80.9	9.31	3.4	2	11.455	4.342	5.015	0.0343473	0.242811	0.11173	210.1	18.3	79.6	92	19.19	58.09	43.77	41.25	2.08683e+07	1.4783e+07	2.1295e+07	1.82173e+06	1.14585e+06	3.61102e+06	7.91069e+06	3.84135e+06	1.01409e+07	9.13621e+06	5.35971e+06	1.28909e+07	Peak Found	Not Found	High	Peak Found	Peak Found	Peak Found	Peak Found
FALSE	High	Master Protein	Glyma.14G038300.1.p	PTHR11413//PTHR11413:SF57 - CYSTATIN FAMILY MEMBER // SUBFAMILY NOT NAMED (1 of 2)	0	32.605	41	7	27	2	7	200	22.5	5.3	72.08	7	11.314	1.338	18.184	0.0014569	0.897759	0.00039366	142.2	12.6	16.8	228.5	6.56	32.84	35.84	12.35	2.07124e+08	182086563	1.90967e+08	1.44712e+07	1.68793e+07	2.64285e+07	2.11708e+07	2.25915e+07	3.89527e+07	2.79165e+08	3.06925e+08	3.55775e+08	High	High	High	High	High	High	High
FALSE	High	Master Protein	Glyma.08G196300.1.p	PTHR12292 - RWD DOMAIN-CONTAINING PROTEIN (1 of 2)	0	24.361	25	5	16	4	4	253	28.4	4.28	22.34	5	9.372	1.88	8.056	0.00446605	0.53637	0.00390161	184.6	19.7	37	158.7	39.09	37.26	3.58	21.28	2.85798e+07	2.37592e+07	4.85535e+07	3.04957e+06	2.31264e+06	4.76362e+06	5.73358e+06	5.47029e+06	5.8711e+06	1.96609e+07	3.02149e+07	2.4567e+07	High	High	High	Peak Found	High	Peak Found	High
FALSE	High	Master Protein	Glyma.02G195400.1.p	PTHR19957:SF69 - SYNTAXIN-121-RELATED (1 of 6)	0	10.913	10	3	4	1	1	335	37.3	7.31	8.75	3	9.09	0.925	0.01	0.0171938	1	NA	330.1	36.3	33.6	NA	24.44	48.12	8.46	NA	2.35121e+07	1.79051e+07	2.94521e+07	1.91358e+06	2.5867e+06	4.75428e+06	2.35277e+06	2.73699e+06	2.39385e+06	NA	NA	NA	Peak Found	Peak Found	Peak Found	High	Not Found	Peak Found	Not Found
FALSE	High	Master Protein	Glyma.01G116000.6.p	K10802 - high mobility group protein B1 (HMGB1) (1 of 2)	0	46.591	19	5	26	0	5	169	18.9	5.94	98.52	5	9.079	4.282	8.715	0.02675	0.073955	0.0133849	157.4	17.3	74.2	151.1	12.99	58.6	42.94	28.85	9.35729e+07	7.2295e+07	8.76456e+07	1.33756e+07	9.65343e+06	3.23473e+06	4.1337e+07	2.67211e+07	6.43074e+07	7.4639e+07	8.41281e+07	1.26125e+08	High	High	High	High	High	Peak Found	High
FALSE	High	Master Protein	Glyma.19G131500.1.p	1.5.1.2 - Pyrroline-5-carboxylate reductase / P5CR (1 of 2)	0	21.61	27	6	14	3	6	274	28.5	8.32	19.9	6	8.889	1.614	4.418	0.00890146	0.53969	0.0261142	223.3	25.1	40.5	111	5.55	9.27	62.87	6.58	1.23519e+07	1.23188e+07	1.11864e+07	1.32626e+06	1.38591e+06	1.57998e+06	1.59554e+06	2.23641e+06	5.11608e+06	5.71888e+06	6.12302e+06	6.52509e+06	High	High	High	High	High	Not Found	Peak Found
FALSE	High	Master Protein	Glyma.08G265200.1.p	PF00036//PF13499 - EF hand (EF-hand_1) // EF-hand domain pair (EF-hand_7) (1 of 2)	0	21.476	14	3	12	0	3	229	26.1	4.77	28.66	3	8.845	16.236	8.585	0.0141917	0.00544654	0.0102779	102.1	11.5	187.3	99.1	3.64	25.42	50.54	21.81	1.18106e+07	1.23292e+07	1.14705e+07	849799	1.41188e+06	1.33526e+06	2.44076e+07	7.56813e+06	2.16799e+07	1.14631e+07	1.15559e+07	7.64928e+06	High	High	High	High	Not Found	Peak Found	Not Found
FALSE	High	Master Protein	Glyma.03G253300.1.p	K11091 - U1 small nuclear ribonucleoprotein A (SNRPA) (1 of 2)	0	25.94	24	5	16	0	5	241	26.9	9.44	38.85	5	8.788	4.929	5.296	0.0106742	0.0120077	0.0156976	175.6	20	98.5	105.8	23.19	2.27	60.94	21.62	1.59053e+07	1.27997e+07	9.9333e+06	1.4565e+06	1.4527e+06	1.51251e+06	7.17945e+06	6.62551e+06	1.81261e+07	6.82317e+06	1.02661e+07	7.71347e+06	High	High	High	Peak Found	High	Not Found	High
FALSE	High	Master Protein	Glyma.12G010300.2.p	K14005 - protein transport protein SEC31 (SEC31) (1 of 2)	0	76.487	15	12	45	0	1	1097	119.3	5.15	113.57	12	8.445	6.161	2.712	0.0156358	0.0224102	0.162391	184.4	21.8	134.5	59.2	8.94	17.64	16.16	62.74	2.70987e+07	2.44191e+07	2.27126e+07	2.78671e+06	2.89166e+06	3.80012e+06	1.43134e+07	1.78142e+07	1.98502e+07	7.84212e+06	1.63214e+07	4.66057e+06	Peak Found	High	Peak Found	Peak Found	High	Peak Found	Peak Found
FALSE	High	Master Protein	Glyma.02G050600.1.p	PF11833 - Protein of unknown function (DUF3353) (DUF3353) (1 of 7)	0	24.138	10	2	9	0	2	281	31.4	10.08	21.76	2	8.077	1.132	0.578	0.0120949	1	0.799386	299.5	37.1	42	21.4	34.55	28.77	33.47	14.04	1.74754e+07	8.37977e+06	1.50757e+07	1.8665e+06	1.99039e+06	1.11046e+06	1.18672e+06	2.11282e+06	2.40614e+06	1.11749e+06	853353	1.07898e+06	High	High	High	High	High	Peak Found	Not Found
FALSE	High	Master Protein	Glyma.10G059500.1.p	K01803 - triosephosphate isomerase (TIM) (TPI, tpiA) (1 of 5)	0	231.269	62	18	254	3	3	304	32.5	6.7	821.46	18	7.91	1.896	1.019	0.00631693	0.424384	1	267.6	33.8	64.1	34.5	24.49	45.23	6.33	5.8	4.35827e+07	2.63307e+07	3.60511e+07	7.9251e+06	3.32127e+06	4.55776e+06	8.64252e+06	9.38953e+06	8.30432e+06	4.64311e+06	4.24803e+06	4.74759e+06	High	High	High	High	High	Not Found	Not Found
FALSE	High	Master Protein	Glyma.09G165600.1.p	K03245 - translation initiation factor 3 subunit J (EIF3J) (1 of 2)	0	75.854	50	9	67	3	3	229	25.8	4.87	235.67	9	7.885	3.569	0.808	0.00442481	0.0232002	0.900529	237.8	30.2	107.6	24.4	16.3	13.64	4.24	42.06	1.3592e+07	1.28474e+07	1.72835e+07	1.44935e+06	1.7238e+06	1.90865e+06	6.01972e+06	6.52925e+06	6.15222e+06	1.3932e+06	1.77402e+06	703348	High	Peak Found	High	Not Found	Peak Found	Not Found	Peak Found
FALSE	High	Master Protein	Glyma.07G008000.2.p	PTHR11043//PTHR11043:SF6 - ZETA-COAT PROTEIN // SUBFAMILY NOT NAMED (1 of 3)	0	22.09	26	3	9	0	3	180	20.1	4.86	26.84	3	7.798	3.163	3.4	0.0106742	0.04521	0.0583919	203.1	26	82.4	88.5	26	11.32	51.67	9.78	3.0811e+07	4.35932e+07	5.27523e+07	5.54527e+06	5.59029e+06	6.73538e+06	17683188	1.34881e+07	3.49836e+07	1.90091e+07	1.96332e+07	1.62694e+07	High	High	Peak Found	High	High	Not Found	Peak Found
FALSE	High	Master Protein	Glyma.05G037400.1.p	K13343 - peroxin-14 (PEX14) (1 of 2)	0	24.645	11	4	18	0	4	502	54.6	5.81	73.36	4	7.15	3.486	1.8	0.00119594	0.00468486	0.178081	212.9	29.8	103.8	53.6	19.18	18.26	17.02	14.3	24472218	1.68746e+07	2.35715e+07	3.2965e+06	3.09097e+06	4.30689e+06	1.14901e+07	1.13009e+07	1.51178e+07	4.92903e+06	6.57933e+06	5.93224e+06	High	High	High	High	High	High	High
FALSE	High	Master Protein	Glyma.06G100600.1.p	K01214 - isoamylase (E3.2.1.68) (1 of 3)	0	24.786	7	4	15	0	4	772	87	6.13	45.32	4	7.11	0.326	0.697	0.000800998	0.00569763	0.458961	311.4	43.8	14.3	30.5	20.14	15.7	13.18	18.44	6.05297e+07	7.26024e+07	9.03504e+07	8.77102e+06	1.20075e+07	1.02111e+07	2.67151e+06	3324225	3.44069e+06	6.08243e+06	8.7602e+06	7.12088e+06	High	High	High	High	High	Not Found	High
FALSE	High	Master Protein	Glyma.20G009200.1.p	NA	0	14.846	9	4	7	0	4	511	55.1	4.91	15.78	4	6.567	8.4	7.186	0.000800998	0.000388638	0.000275672	113.5	17.3	145.1	124.1	24.33	7.58	11.78	17.46	1.51299e+07	1.26685e+07	2.0311e+07	2.06248e+06	2.30383e+06	2.39239e+06	1.58389e+07	1.93533e+07	1.97632e+07	1.65565e+07	2.1132e+07	1.52676e+07	Peak Found	Peak Found	High	High	Not Found	Peak Found	Peak Found
FALSE	High	Master Protein	Glyma.13G119900.1.p	PTHR21230//PTHR21230:SF35 - VESICLE TRANSPORT V-SNARE PROTEIN VTI1-RELATED // SUBFAMILY NOT NAMED (1 of 2)	0	18.426	12	3	19	0	3	269	30.3	6.58	42.27	3	6.441	4.415	4.007	0.00114245	0.00242438	0.00132901	162.4	25.2	111.3	101	12.18	2.57	14.7	29.89	3.37309e+07	4.13505e+07	4.25318e+07	6.21991e+06	6.42023e+06	6.54579e+06	2.83471e+07	2.44616e+07	3.28454e+07	2.5557e+07	4.16827e+07	2.57281e+07	High	Peak Found	High	Peak Found	High	Peak Found	High
FALSE	High	Master Protein	Glyma.08G038100.1.p	PTHR12383:SF25 - CHLOROPLAST PROCESSING PEPTIDASE (1 of 2)	0	85.052	38	9	47	6	9	293	32.3	6.27	133.05	9	6.362	1.099	1.38	0.00444158	1	0.741054	258.6	40.6	44.7	56.1	8.09	8.8	31.1	30.63	2.12752e+08	1.82587e+08	2.08299e+08	3.22771e+07	3.27408e+07	3.77154e+07	3.59957e+07	3.5681e+07	5.93643e+07	4.5185e+07	6.58449e+07	3.65237e+07	High	High	High	High	High	Peak Found	High
FALSE	High	Master Protein	Glyma.01G002600.1.p	3.6.1.9 - Nucleotide diphosphatase / Nucleotide pyrophosphatase (1 of 4)	0	13.006	6	3	13	2	2	462	51	6.68	25.22	3	6.3	7.218	2.279	0.0156358	0.00796263	0.145575	150	23.8	171.9	54.3	10.49	45.51	23.39	26.12	9.87531e+06	8.0157e+06	9.27994e+06	2.364e+06	931480	1.47291e+06	1.06318e+07	7.45271e+06	1.20362e+07	3.35623e+06	4.78653e+06	2.94784e+06	High	High	High	Peak Found	Peak Found	Not Found	High
FALSE	High	Master Protein	Glyma.10G200100.1.p	PTHR10343:SF58 - PHOSPHOGLUCAN PHOSPHATASE DSP4, CHLOROPLASTIC (1 of 2)	0	42.569	21	8	41	2	2	371	41.9	5.78	109.47	8	6.144	6.206	2.472	0.00205628	0.0016038	0.0216856	155.3	25.3	156.9	62.5	21.43	11.63	21.29	27.95	1.22942e+07	1.86659e+07	1.44377e+07	1.91367e+06	2.36752e+06	2.34994e+06	1.32641e+07	1.96497e+07	1.45838e+07	4.88166e+06	8.30303e+06	5.80817e+06	Peak Found	High	High	High	Peak Found	Not Found	Peak Found
FALSE	High	Master Protein	Glyma.07G124500.1.p	PTHR19443//PTHR19443:SF26 - HEXOKINASE // SUBFAMILY NOT NAMED (1 of 7)	0	29.388	16	6	16	0	1	498	53.6	6.35	27.6	6	5.701	2.376	1.457	0.00161442	0.0565955	0.387617	216.5	38	90.2	55.3	10.77	14.07	29.48	9.42	1.78445e+07	2.16364e+07	1.82876e+07	3.339e+06	3.20784e+06	2.54361e+06	7.62276e+06	8208650	4.49398e+06	4.67309e+06	4.14898e+06	5.01137e+06	Not Found	Not Found	Peak Found	High	High	Peak Found	High
FALSE	High	Master Protein	Glyma.02G308700.1.p	PTHR32382:SF4 - FASCICLIN-LIKE ARABINOGALACTAN PROTEIN 1 (1 of 6)	0	85.399	30	9	79	2	2	406	43.5	6.87	248.56	9	5.577	2.849	6.267	0.0171938	0.0875597	0.00410497	142.2	25.5	72.6	159.7	29.61	25.32	22.22	27.36	3.00131e+07	1.90318e+07	3.53823e+07	4.51504e+06	7.35549e+06	5.38111e+06	1.53324e+07	1.1525e+07	1.81717e+07	3.04051e+07	49834148	3.37242e+07	Peak Found	Peak Found	High	Not Found	Not Found	Peak Found	Peak Found
FALSE	High	Master Protein	Glyma.08G335300.1.p	K11338 - RuvB-like protein 2 [EC:3.6.4.12] (RUVBL2, RVB2, INO80J) (1 of 2)	0	27.906	19	7	10	2	7	465	51	5.47	15.47	7	5.504	6.442	4.813	0.00137388	0.000813054	0.00115626	124	22.5	145.1	108.4	15.28	17.69	13.14	22.1	1.62667e+07	1.32674e+07	1.80683e+07	2.95533e+06	3.03457e+06	2.16482e+06	1.51546e+07	1.90382e+07	1.9377e+07	1.15012e+07	1.42226e+07	1.79048e+07	High	Peak Found	High	High	Not Found	Not Found	High
FALSE	High	Master Protein	Glyma.15G129300.1.p	PTHR12634:SF17 - SIT4 PHOSPHATASE-ASSOCIATED FAMILY PROTEIN (1 of 2)	0	75.191	15	8	22	8	8	838	92.4	4.69	69.93	8	5.347	1.389	1.629	0.0149039	0.414436	0.562032	228.4	42.7	59.3	69.6	11.21	27.02	47.97	7.55	4.46506e+07	4.6694e+07	3.75201e+07	8.35128e+06	5.94901e+06	1.0391e+07	1.16006e+07	1.13059e+07	2.46101e+07	1.39609e+07	1.20811e+07	1.36032e+07	High	Peak Found	High	Not Found	High	High	Peak Found
FALSE	High	Master Protein	Glyma.10G154300.1.p	PF09353 - Domain of unknown function (DUF1995) (DUF1995) (1 of 11)	0	33.526	28	8	24	2	8	344	38.7	4.91	48.81	8	4.955	5.379	3.671	0.0100622	0.00432356	0.00812482	132.1	26.7	143.4	97.9	18.3	25.45	16.88	21.76	3.69767e+07	2.64942e+07	3.72969e+07	7.46253e+06	1.06952e+07	6.72612e+06	4.01443e+07	3.25867e+07	4.58959e+07	2.73939e+07	3.60563e+07	2.37436e+07	High	High	High	High	Peak Found	Not Found	High
FALSE	High	Master Protein	Glyma.01G237800.1.p	NA	0	18.881	17	3	10	3	3	155	16.7	5.02	18.42	3	4.738	0.958	0.743	0.0149054	1	0.876137	254.8	53.8	51.5	40	2.46	11.31	42.62	14.14	5.56312e+07	5.35919e+07	5.61662e+07	1.17404e+07	1.28696e+07	1.02502e+07	6.11334e+06	1.12488e+07	1.54086e+07	8.72654e+06	9.27404e+06	7.01404e+06	High	High	High	High	High	Peak Found	High
FALSE	High	Master Protein	Glyma.14G014800.5.p	K02739 - 20S proteasome subunit beta 2 (PSMB7) (1 of 2)	0	12.024	11	4	12	3	4	271	29.3	7.25	26.48	4	4.651	2.763	3.962	0.00820695	0.0266626	0.00462138	150.3	32.3	89.3	128.1	1.72	12.77	15.36	42.42	4.15382e+07	4.08093e+07	4.22357e+07	7.2063e+06	9.18846e+06	8.93137e+06	2.17405e+07	2.46745e+07	2.9434e+07	3.53825e+07	6.17354e+07	2.80787e+07	High	Peak Found	High	High	Peak Found	Peak Found	High
FALSE	High	Master Protein	Glyma.04G117800.2.p	PTHR30560//PTHR30560:SF4 - TRIGGER FACTOR CHAPERONE AND PEPTIDYL-PROLYL CIS/TRANS ISOMERASE // SUBFAMILY NOT NAMED (1 of 2)	0	21.384	29	7	15	2	7	204	23	6.35	20.12	7	4.607	2.756	2.351	0.0088785	0.0611499	0.0931887	172	37.3	102.9	87.8	36.56	12.2	19.85	16.95	9.44682e+07	5.77035e+07	4.82351e+07	1.48578e+07	1.2526e+07	1.1811e+07	2.53233e+07	3.45196e+07	3.77764e+07	2.34204e+07	2.94512e+07	3.30197e+07	High	Peak Found	High	Peak Found	High	Peak Found	High
FALSE	High	Master Protein	Glyma.19G174700.1.p	PF07719//PF13174 - Tetratricopeptide repeat (TPR_2) // Tetratricopeptide repeat (TPR_6) (1 of 1)	0	48.813	30	11	30	7	8	351	39.9	6.48	60.99	11	4.186	6.627	4.394	0.00253573	0.000477625	0.0014767	103.3	24.7	163.5	108.5	10.56	10.79	18.05	22.48	2.21825e+07	2.12125e+07	2.5834e+07	5.29862e+06	6.16211e+06	5.02613e+06	3.51114e+07	3.25821e+07	4.54275e+07	1.80326e+07	2.84962e+07	2.32835e+07	High	High	High	Peak Found	High	Not Found	High
FALSE	High	Master Protein	Glyma.04G236800.1.p	K12827 - splicing factor 3A subunit 3 (SF3A3, SAP61, PRP9) (1 of 2)	0	14.824	6	3	5	1	3	509	59.5	5.12	8.22	3	4.163	2.228	1.697	0.001356	0.0173674	0.0423427	183.2	44	98.1	74.7	0.45	24.19	11.31	9.02	2.03641e+07	2.05165e+07	2.05286e+07	4.92792e+06	5.90716e+06	3.58985e+06	8.98714e+06	1.09788e+07	1.1044e+07	8.36264e+06	9.59392e+06	8.1358e+06	High	Peak Found	High	Not Found	Peak Found	Not Found	Peak Found
FALSE	High	Master Protein	Glyma.05G243600.1.p	K12861 - pre-mRNA-splicing factor SPF27 (BCAS2) (1 of 2)	0	8.534	12	4	6	0	4	253	29.4	6.58	10.24	4	4.128	4.936	2.187	0.00613981	0.00319345	0.0334957	134.8	32.7	161.2	71.4	8.01	25.1	3.03	30.02	3.32037e+07	2.89005e+07	2.90827e+07	7.04515e+06	4.73191e+06	7.92249e+06	3.53298e+07	3.47752e+07	3.33103e+07	15407387	2.19887e+07	1.22523e+07	Peak Found	Peak Found	High	Not Found	Peak Found	Peak Found	Not Found
FALSE	High	Master Protein	Glyma.16G204600.1.p	PTHR11902//PTHR11902:SF18 - ENOLASE // SUBFAMILY NOT NAMED (1 of 4)	0	51.106	27	9	71	0	3	445	48	6.47	171.25	9	4.088	0.01	4.185	0.0412049	NA	0.0306551	176.3	43.1	NA	180.5	44.9	24.11	NA	23.53	4.73483e+06	4.40681e+06	9.3587e+06	1.49814e+06	925620	1.15834e+06	NA	NA	NA	4.51045e+06	6.86291e+06	4.84725e+06	High	High	High	Peak Found	Not Found	Not Found	Not Found
FALSE	High	Master Protein	Glyma.06G018700.1.p	NA	0	23.394	14	6	22	2	2	449	51.5	6.33	28.99	6	4.037	4.819	3.031	0.0276305	0.0112954	0.0255228	125.3	31	149.6	94.1	20.82	18.22	30.43	20.12	4.1918e+06	6.17878e+06	6.18458e+06	1.26129e+06	1.82163e+06	1.53072e+06	8.29438e+06	4.40028e+06	7.37589e+06	4.63959e+06	6.01418e+06	4.09501e+06	Peak Found	Peak Found	High	Peak Found	Peak Found	Not Found	High
FALSE	High	Master Protein	Glyma.15G112500.1.p	PTHR31906:SF5 - PLASTID-LIPID-ASSOCIATED PROTEIN 3, CHLOROPLASTIC-RELATED (1 of 3)	0	70.244	41	9	54	4	4	306	33.3	5.86	152.01	9	3.837	4.691	8.025	0.0331743	0.0124504	0.00362904	87.4	22.8	106.9	182.9	18.31	13.76	46.29	19.25	2.83821e+07	2.37573e+07	3.42819e+07	7.64505e+06	7.39638e+06	5.8731e+06	2.2109e+07	3.46994e+07	5.67216e+07	4.29196e+07	5.93535e+07	6.27043e+07	High	High	High	High	High	Not Found	High
FALSE	High	Master Protein	Glyma.03G080200.1.p	NA	0	43.368	47	6	70	0	3	197	20.9	4.86	197.17	6	3.828	3.418	2.452	0.02675	0.0202754	0.109661	143.1	37.4	127.8	91.7	10.92	32.56	21.5	20.56	1.01163e+08	8.19472e+07	9.7558e+07	2.31143e+07	2.54879e+07	4.1022e+07	7.62402e+07	87119983	1.14911e+08	4.71694e+07	7.18e+07	6.24982e+07	High	High	High	High	High	High	High
FALSE	High	Master Protein	Glyma.11G244700.1.p	K09497 - T-complex protein 1 subunit epsilon (CCT5) (1 of 2)	0	29.583	13	5	30	0	5	535	59.2	5.85	68.73	5	3.647	2.415	4.16	0.00205628	0.00608646	0.000620697	130	35.6	86.1	148.3	17.21	9.24	17.65	2.65	5.02947e+07	5.52153e+07	3.90364e+07	1.37916e+07	1.55654e+07	1.30184e+07	3.02539e+07	4.22305e+07	3.33048e+07	5.88318e+07	5.73777e+07	5.57887e+07	High	High	High	High	High	Peak Found	High
FALSE	High	Master Protein	Glyma.03G014300.1.p	K15095 - (+)-neomenthol dehydrogenase (E1.1.1.208) (1 of 12)	0	76.365	38	11	46	5	5	299	32.4	5.55	121.21	11	3.628	4.826	3.047	0.0276305	0.00608646	0.0190637	116.1	32	154.4	97.5	8.62	35.77	22.42	20.94	2.57057e+07	2.2536e+07	2.66401e+07	1.04593e+07	5.11583e+06	7.0863e+06	3.04175e+07	3.42001e+07	4.62891e+07	2.15887e+07	3.02591e+07	2.12642e+07	High	High	High	High	High	Not Found	Peak Found
FALSE	High	Master Protein	Glyma.01G161500.1.p	2.8.1.1 - Thiosulfate sulfurtransferase / Thiosulfate thiotransferase (1 of 6)	0	65.775	28	5	50	2	2	186	20.2	8.48	159.86	5	3.596	0.85	2.85	0.0120949	1	0.0143335	173.4	48.2	41	137.4	8.44	23.99	19.91	23.42	3.69413e+07	4.33918e+07	4.22962e+07	1.32348e+07	1.17626e+07	8.09536e+06	9.26375e+06	9.99746e+06	1.3321e+07	3.35255e+07	4.11421e+07	2.55029e+07	High	High	High	High	High	High	Peak Found
FALSE	High	Master Protein	Glyma.05G168900.1.p	KOG2770 - Aminomethyl transferase (1 of 1)	0	24.878	12	4	13	2	4	423	46.1	7.21	41	4	3.567	3.003	5.792	0.0126735	0.0244245	0.00213415	106.8	29.9	89.9	173.4	17.12	5.35	26.59	19.87	2.01342e+07	1.43362e+07	1.66635e+07	4.67152e+06	4.48546e+06	4.98477e+06	1.40287e+07	9.12578e+06	1.57844e+07	2.71576e+07	2.70562e+07	1.87402e+07	High	High	Peak Found	High	High	Not Found	High
FALSE	High	Master Protein	Glyma.19G195100.1.p	K11099 - small nuclear ribonucleoprotein G (SNRPG, SMG) (1 of 3)	0	28.853	51	5	40	2	2	79	8.8	9.25	115.51	5	3.454	1.314	4.948	0.0495747	0.977421	0.0169954	128.9	37.3	49	184.7	15.18	2.23	27.61	43.44	2.66533e+07	3.49153e+07	2.76314e+07	8.28784e+06	8.00046e+06	7.95502e+06	1.00659e+07	1.05089e+07	1.61244e+07	2.10938e+07	5.43263e+07	3.95878e+07	High	High	Peak Found	High	High	High	High
FALSE	High	Master Protein	Glyma.02G139900.3.p	K12741 - heterogeneous nuclear ribonucleoprotein A1/A3 (HNRNPA1_3) (1 of 20)	0	49.735	17	6	25	0	6	384	41.3	7.02	76.55	6	3.392	2.817	2.054	0.0126735	0.0130972	0.116513	146.5	43.2	121.6	88.7	17.86	17.42	3.82	22.2	1.57215e+07	2.02623e+07	2.25725e+07	7.70373e+06	5.9741e+06	5.60697e+06	1.68284e+07	1.78961e+07	1.67071e+07	8.47152e+06	1.22701e+07	1.32233e+07	High	High	High	High	High	Peak Found	High
FALSE	High	Master Protein	Glyma.19G244500.1.p	NA	0	55.123	41	11	27	9	9	326	35.8	4.6	55.2	11	3.28	4.289	2.93	0.0171403	0.00809847	0.0239985	114.1	34.8	149.2	101.9	35.36	16.53	22.16	20.7	4.6089e+07	4.63451e+07	8.17852e+07	1.10694e+07	1.41294e+07	1.54293e+07	6.0597e+07	4.91582e+07	7.65645e+07	4.1398e+07	5.2844e+07	3.52403e+07	High	High	High	Peak Found	High	Peak Found	Peak Found
FALSE	High	Master Protein	Glyma.04G009800.1.p	K18649 - inositol-phosphate phosphatase / L-galactose 1-phosphate phosphatase / histidinol-phosphatase (IMPL2) (1 of 1)	0	11.74	8	2	8	0	2	303	33.5	6.11	24.68	2	3.266	2.699	3.084	0.0118716	0.0247994	0.00812861	130	39.8	107.4	122.8	20.75	1.88	27.34	12.16	1.08265e+07	1.23628e+07	1.61099e+07	3.70958e+06	3.78574e+06	3.85178e+06	6.88022e+06	1.21476e+07	1.02173e+07	1.33798e+07	1.05125e+07	1.16768e+07	Peak Found	High	High	High	High	Not Found	High
FALSE	High	Master Protein	Glyma.03G088500.1.p	K03012 - DNA-directed RNA polymerase II subunit RPB4 (RPB4, POLR2D) (1 of 5)	0	7.112	12	2	3	0	2	138	15.9	4.83	6.19	2	3.256	1.921	1.806	0.00096361	0.011953	0.0186906	163.1	50.1	96.2	90.5	10.97	16.77	1.7	6.7	1.42656e+07	1.1456e+07	1.27495e+07	3.55534e+06	4.89077e+06	3.9159e+06	7.37175e+06	7.52076e+06	7.62528e+06	6.461e+06	7.07273e+06	7.37839e+06	Peak Found	High	High	Peak Found	Peak Found	Peak Found	Not Found
FALSE	High	Master Protein	Glyma.07G073700.1.p	PTHR16254:SF13 - K(+) EFFLUX ANTIPORTER 1, CHLOROPLASTIC-RELATED (1 of 4)	0	122.583	20	17	73	0	10	1206	129.7	5.03	204.44	17	3.244	2.044	1.428	0.0067601	0.0694521	0.473788	168.2	51.8	105.9	74	34.44	1.77	15.53	5.13	5.54668e+07	5.15081e+07	9.31233e+07	1.73891e+07	1.70962e+07	1.67855e+07	2.89083e+07	3.49387e+07	3.95898e+07	2.44051e+07	2.59248e+07	2.34197e+07	High	High	High	High	High	Peak Found	High
FALSE	High	Master Protein	Glyma.08G128300.1.p	K14294 - partner of Y14 and mago (WIBG, PYM) (1 of 3)	0	9.991	15	2	4	0	2	196	22.2	9.29	8.48	2	3.107	2.256	2.224	0.0218448	0.0296079	0.0338679	144.7	46.6	105.1	103.6	6.25	18.4	24.95	29.79	1.09186e+07	1.08247e+07	9.73933e+06	3.63442e+06	2.54113e+06	3.48414e+06	7.257e+06	7.8588e+06	1.13313e+07	7.74709e+06	6.39021e+06	1.12786e+07	Not Found	Not Found	Peak Found	Peak Found	Peak Found	High	Not Found
FALSE	High	Master Protein	Glyma.15G027500.1.p	PF06741//PF07145//PF14438 - LsmAD domain (LsmAD) // Ataxin-2 C-terminal region (PAM2) // Ataxin 2 SM domain (SM-ATX) (1 of 2)	0	15.191	7	4	5	0	4	642	69.3	5.71	7.21	4	3.107	0.475	2.952	0.02675	0.0363895	0.0143131	165	53.1	25.2	156.7	26.42	11.43	10.45	14.23	4.67216e+06	7.93767e+06	7.49099e+06	2.41109e+06	2.86414e+06	2.32493e+06	1.00952e+06	1.14487e+06	1.24549e+06	7.48675e+06	5.66821e+06	7.11834e+06	Peak Found	High	High	Not Found	Not Found	High	Not Found
FALSE	High	Master Protein	Glyma.14G186900.2.p	PTHR11624:SF56 - PYRUVATE DEHYDROGENASE E1 COMPONENT SUBUNIT BETA, MITOCHONDRIAL (1 of 3)	0	109.028	38	9	110	2	2	360	38.6	5.96	337.97	9	3.042	1.96	0.727	0.00689509	0.0583749	0.342017	180.8	59.4	116.5	43.2	6.07	15.85	16.6	19.14	1.99415e+07	1.8299e+07	1.77676e+07	5.09634e+06	6.01534e+06	7.01089e+06	1.17879e+07	1.29036e+07	9.24066e+06	4.37369e+06	3.36058e+06	4.96213e+06	High	High	High	High	High	Not Found	High
FALSE	High	Master Protein	Glyma.15G014400.1.p	PTHR19375//PTHR19375:SF190 - HEAT SHOCK PROTEIN 70KDA // SUBFAMILY NOT NAMED (1 of 4)	0	137.109	33	21	79	7	7	863	95.7	5.22	196.24	21	3.042	1.406	1.525	0.0392529	0.287476	0.22938	174.5	57.4	80.7	87.5	14.99	26.26	29.78	25.56	2.6972e+07	2.10033e+07	2.80603e+07	8.92754e+06	8.86553e+06	5.38302e+06	1.18881e+07	1.24653e+07	1.97411e+07	1.89544e+07	1.17219e+07	1.35211e+07	High	High	High	High	High	High	High
FALSE	High	Master Protein	Glyma.11G082300.1.p	2.8.1.1 - Thiosulfate sulfurtransferase / Thiosulfate thiotransferase (1 of 6)	0	42.933	24	5	39	2	2	223	24.5	8.9	105.09	5	3.042	0.603	2.346	0.0171403	0.44232	0.0618319	174	57.2	34.5	134.2	35.01	5.99	22.34	14.63	2.22954e+07	2.28812e+07	3.97451e+07	8.26056e+06	7.52204e+06	7.40742e+06	4.0849e+06	4.53912e+06	6.18048e+06	1.76439e+07	1.9757e+07	1.46978e+07	High	High	High	Peak Found	High	Peak Found	Peak Found
FALSE	High	Master Protein	Glyma.02G073000.1.p	PTHR21087:SF4 - INACTIVE SHIKIMATE KINASE LIKE 1, CHLOROPLASTIC-RELATED (1 of 2)	0	24.791	21	6	24	0	6	280	30.8	6.57	53.21	6	2.936	3.758	2.317	0.0291784	0.00544654	0.0613645	117.3	40	150.2	92.6	11.67	11.14	30.67	25.01	2.47672e+07	3.09871e+07	2.65539e+07	1.05468e+07	9.04501e+06	8.5373e+06	3.39171e+07	3.39953e+07	5.58772e+07	1.58618e+07	2.64022e+07	2.09599e+07	High	High	High	High	High	Peak Found	High
FALSE	High	Master Protein	Glyma.10G155000.1.p	K01875 - seryl-tRNA synthetase (SARS, serS) (1 of 3)	0	113.517	41	16	93	4	4	447	51.3	6.43	198.13	16	2.862	2.259	3.634	0.00316144	0.00658842	0.000577221	117.3	41	92.6	149	14.88	14.42	10.41	9.88	1.55298e+07	1.31216e+07	1.15694e+07	4.5849e+06	3.90356e+06	5.22104e+06	1.17261e+07	1.03571e+07	9.55465e+06	1.6324e+07	1.66633e+07	1.94717e+07	High	High	High	High	High	High	Not Found
FALSE	High	Master Protein	Glyma.04G077400.1.p	K02738 - 20S proteasome subunit beta 1 (PSMB6) (1 of 2)	0	52.467	38	9	46	1	9	233	25.1	5.36	142.41	9	2.791	2.579	1.346	0.00689509	0.00694389	0.230043	144.7	51.8	133.7	69.8	9.73	3.24	12.26	25.47	6.33062e+07	5.96758e+07	7.19792e+07	2.17496e+07	2.26838e+07	2.31867e+07	5.2273e+07	5.84908e+07	6.67359e+07	3.05344e+07	4.33349e+07	2.70663e+07	High	High	High	High	High	Peak Found	High
FALSE	High	Master Protein	Glyma.05G166300.1.p	PTHR10903:SF39 - TRANSLOCASE OF CHLOROPLAST 159, CHLOROPLASTIC (1 of 3)	0	164.186	24	23	89	17	17	1240	133.3	4.61	258.61	23	2.734	1.417	1.38	0.0299601	0.484483	0.529501	167.5	61.3	86.8	84.5	15.13	12.08	22.94	21.87	1.52142e+08	1.17337e+08	1.56588e+08	5.5638e+07	4.65227e+07	5.90834e+07	6.35678e+07	7.88149e+07	1.00526e+08	6.1105e+07	7.67532e+07	9.5023e+07	High	High	High	High	High	High	High
FALSE	High	Master Protein	Glyma.04G018200.1.p	PF05542 - Protein of unknown function (DUF760) (DUF760) (1 of 16)	0	90.839	41	13	64	1	6	345	38.4	5.9	157.46	13	2.731	2.826	2.233	0.0171938	0.0164994	0.021188	124.3	45.5	128.6	101.6	9.7	14.02	25.08	12.93	2.99164e+07	3.63521e+07	3.3444e+07	1.33575e+07	1.00796e+07	1.22473e+07	3.46157e+07	2.21097e+07	3.63957e+07	3.23004e+07	2.51674e+07	2.73441e+07	High	High	High	High	High	Peak Found	High
FALSE	High	Master Protein	Glyma.18G222200.1.p	PTHR32382:SF5 - FASCICLIN-LIKE ARABINOGALACTAN PROTEIN 10-RELATED (1 of 2)	0	73.655	31	9	108	3	3	416	42.5	6.34	330	9	2.635	2.403	1.158	0.00631693	0.00433541	0.802676	146.5	55.6	133.6	64.3	6.07	13.56	18.36	9.99	1.73049e+07	1.53253e+07	1.6454e+07	5.63566e+06	7.35015e+06	6.24336e+06	1.43758e+07	1.98843e+07	1.50028e+07	7.22764e+06	7.16555e+06	8.5164e+06	Not Found	High	High	High	High	High	Not Found
FALSE	High	Master Protein	Glyma.16G048100.1.p	K01191 - alpha-mannosidase (E3.2.1.24) (1 of 7)	0	34.595	10	9	31	0	6	1011	115	5.91	70.45	9	2.578	2.054	1.351	0.02675	0.0397201	0.71966	147.7	57.3	117.7	77.4	6.58	29.73	16.21	15.69	5.9893e+07	5.4519e+07	5.28742e+07	2.58168e+07	2.11504e+07	1.38572e+07	4.16055e+07	5.5593e+07	4.34426e+07	2.22355e+07	3.02816e+07	2.85785e+07	High	High	High	High	High	Peak Found	High
FALSE	High	Master Protein	Glyma.11G138800.1.p	KOG2209 - Oxysterol-binding protein (1 of 5)	0	27.527	13	5	17	0	5	450	51.2	5.14	30.5	5	2.524	2.205	1.613	0.02675	0.0444074	0.0643545	137.5	54.5	120.1	87.9	6.08	15.67	12.72	33.6	3.38059e+07	3.49149e+07	3.79801e+07	1.38323e+07	1.45057e+07	1.06866e+07	2.5088e+07	3.05071e+07	3.22233e+07	2.17702e+07	3.79483e+07	2.23103e+07	High	High	Peak Found	High	High	Peak Found	High
FALSE	High	Master Protein	Glyma.13G280600.1.p	PTHR11266:SF16 - PEROXISOMAL MEMBRANE (MPV17/PMP22) FAMILY PROTEIN (1 of 4)	0	12.686	8	2	3	1	2	376	41.9	5.4	7.18	2	2.451	0.665	0.01	0.0329806	0.686467	NA	238.2	97.2	64.6	NA	20.46	22.87	12.27	NA	1.37976e+07	1.04226e+07	9.41815e+06	2.79186e+06	4.25268e+06	4.3321e+06	2.82685e+06	2.3744e+06	3.03266e+06	NA	NA	NA	Peak Found	Peak Found	High	Peak Found	High	Not Found	Peak Found
FALSE	High	Master Protein	Glyma.08G335500.1.p	PTHR33791:SF4 - CHAPERONIN-LIKE RBCX PROTEIN (1 of 3)	0	32.068	28	5	13	1	2	225	25.6	8.85	25.94	5	2.378	2.561	2.141	0.00631693	0.00544654	0.0063444	117.7	49.5	126.8	106	9.5	11.03	18.41	6.31	9.10161e+06	1.03554e+07	8.63609e+06	3.15081e+06	3.82781e+06	3.85306e+06	9.91666e+06	7.01974e+06	9.80403e+06	7.5402e+06	8.54641e+06	8.19481e+06	High	High	High	Peak Found	Not Found	Peak Found	High
FALSE	High	Master Protein	Glyma.02G294900.1.p	PTHR30560:SF3 - TRIGGER FACTOR-LIKE PROTEIN TIG (1 of 4)	0	231.185	52	33	259	1	11	542	61.1	5.19	710.08	33	2.32	1.844	0.976	0.0495267	0.0818554	1	151.1	65.2	120.1	63.6	19.64	9.65	19	32.59	1.57338e+08	1.2026e+08	1.08971e+08	5.18462e+07	5.18922e+07	4.36565e+07	9.38162e+07	9.55816e+07	1.29661e+08	4.42846e+07	7.987e+07	5.06164e+07	High	High	High	High	High	Peak Found	High
FALSE	High	Master Protein	Glyma.18G257700.1.p	PTHR10091:SF10 - ALDOSE 1-EPIMERASE-RELATED (1 of 4)	0	20.486	15	5	14	2	2	371	40.7	9.38	29.77	5	2.229	0.655	0.01	0.0392529	0.264807	NA	229.6	103	67.4	NA	24.92	8.85	7.79	NA	2.73695e+06	4.44588e+06	3.29969e+06	1.48054e+06	1.64344e+06	1.38027e+06	1.0982e+06	956114	969390	NA	NA	NA	Peak Found	High	High	Peak Found	High	Not Found	Peak Found
FALSE	High	Master Protein	Glyma.17G073800.1.p	K01255 - leucyl aminopeptidase (CARP, pepA) (1 of 3)	0	147.119	42	18	122	2	3	570	59.8	7.14	356.67	18	2.187	3.407	1.711	0.0243113	0.00240858	0.155206	105.3	48.2	164.1	82.4	8.28	10.82	5.12	21.99	7.42786e+06	6.60422e+06	7.77667e+06	3.39575e+06	3.06839e+06	3.80779e+06	1.21755e+07	1.09906e+07	1.1571e+07	5.80896e+06	3.9186e+06	6.00892e+06	High	High	Peak Found	High	High	Not Found	High
FALSE	High	Master Protein	Glyma.13G193600.1.p	K03950 - NADH dehydrogenase (ubiquinone) 1 alpha subcomplex subunit 6 (NDUFA6) (1 of 2)	0	38.872	63	8	50	3	5	131	15.1	8.7	110.82	8	2.168	1.173	1.361	0.0486472	0.567934	0.379051	152.1	70.1	82.3	95.5	16.65	7.37	23.69	9.56	4.95407e+07	3.63097e+07	4.89834e+07	2.25902e+07	2.29023e+07	1.99722e+07	2.53675e+07	2.65025e+07	3.82181e+07	3.3748e+07	3.07407e+07	2.78602e+07	High	High	High	High	High	Peak Found	High
FALSE	High	Master Protein	Glyma.09G111700.1.p	PF04755 - PAP_fibrillin (PAP_fibrillin) (1 of 23)	0	71.785	45	11	90	1	4	310	33.6	7.08	233.35	11	2.166	2.027	2.153	0.0246194	0.0201023	0.00833554	117.9	54.5	110.4	117.2	9.39	5.7	13.81	22.7	3.41978e+07	3.73016e+07	4.12408e+07	1.71762e+07	1.72241e+07	1.89541e+07	3.4909e+07	4.25055e+07	3.28722e+07	3.52846e+07	3.7078e+07	5.24663e+07	High	High	High	High	High	Not Found	High
FALSE	High	Master Protein	Glyma.12G232200.1.p	K02963 - small subunit ribosomal protein S18 (RP-S18, MRPS18, rpsR) (1 of 2)	0	12.465	29	5	17	4	5	96	11.4	11.65	26.12	5	2.075	3.028	0.551	0.0267686	0.00356576	0.173718	124.7	60.1	182	33.1	11.43	13.58	1.83	24.18	3.73259e+07	3.38588e+07	2.96519e+07	1.63164e+07	1.7184e+07	1.31692e+07	5.05202e+07	4.94008e+07	4.87268e+07	8.99116e+06	8.82479e+06	1.32419e+07	High	High	Peak Found	High	High	Peak Found	High
FALSE	High	Master Protein	Glyma.06G116200.1.p	PTHR32161:SF8 - PROTEIN TAG-10, ISOFORM A (1 of 1)	0	228.554	45	21	151	21	21	723	79.9	6.67	516.86	21	1.887	1.299	1.122	0.0310896	0.21806	1	142.2	75.4	97.9	84.5	6.02	6.32	25.43	5.7	1.99868e+08	2.24168e+08	2.06001e+08	1.1295e+08	1.09161e+08	9.97866e+07	1.29275e+08	2.04495e+08	1.41789e+08	114204022	1.27973e+08	1.22434e+08	High	High	High	High	High	High	High
FALSE	High	Master Protein	Glyma.02G301700.1.p	1.3.1.80 - Red chlorophyll catabolite reductase / Red Chl catabolite reductase (1 of 2)	0	50.123	32	9	42	0	9	329	37	6.18	83.32	9	1.878	0.812	1.476	0.0187642	0.486025	0.0363677	145.4	77.4	62.9	114.3	6.93	10.32	5.29	14.9	5.5055e+07	4.89283e+07	5.55344e+07	2.75574e+07	2.93167e+07	3.36061e+07	2.38132e+07	2.36135e+07	2.59471e+07	4.19056e+07	5.45497e+07	4.32633e+07	High	High	High	High	High	Peak Found	High
FALSE	High	Master Protein	Glyma.08G362900.1.p	K00616 - transaldolase (E2.2.1.2, talA, talB) (1 of 10)	0	63.937	29	9	41	0	8	439	47.9	6.21	119.6	9	1.692	1.135	0.893	0.027632	0.570854	1	143.4	84.8	96.2	75.7	3.44	19.11	4.82	9.85	4.58787e+07	4.74699e+07	4.43102e+07	2.71231e+07	2.89972e+07	1.9838e+07	3.30815e+07	3.0774e+07	3.02332e+07	2.42094e+07	2.26727e+07	2.74555e+07	High	High	High	High	High	Peak Found	High
FALSE	High	Master Protein	Glyma.14G064500.1.p	PTHR10795//PTHR10795:SF348 - PROPROTEIN CONVERTASE SUBTILISIN/KEXIN // SUBFAMILY NOT NAMED (1 of 14)	0	48.049	16	6	31	5	5	645	69.5	8.43	94.83	6	0.571	0.302	0.371	0.00119594	5.53e-05	3.3e-05	101.7	178.3	53.8	66.2	6.18	2.53	8.46	2.57	1.95815e+07	2.21562e+07	2.11085e+07	3.82273e+07	3.63827e+07	3.69866e+07	1.22086e+07	1.03109e+07	1.11679e+07	1.41063e+07	1.3401e+07	1.37318e+07	High	High	Peak Found	High	High	Peak Found	High
FALSE	High	Master Protein	Glyma.20G031600.1.p	K00592 - [ribulose-bisphosphate carboxylase]-lysine N-methyltransferase (E2.1.1.127) (1 of 2)	0	60.817	23	9	25	4	5	487	55	5.31	65.75	9	0.401	0.493	0.141	0.0488205	0.0958742	0.000711641	78.8	196.5	96.9	27.7	12.47	14.15	5.53	32.76	7726902	7.20786e+06	6.02667e+06	2.121e+07	1.60559e+07	1.79662e+07	9.10382e+06	8.86235e+06	8.17492e+06	2.53172e+06	1.38352e+06	2.72482e+06	High	High	Not Found	High	High	Peak Found	Peak Found
FALSE	High	Master Protein	Glyma.16G049500.1.p	PTHR24322:SF547 - ALCOHOL DEHYDROGENASE-LIKE PROTEIN (1 of 2)	0	9.433	11	2	3	0	2	303	32	8.06	6.26	2	0.394	0.534	0.708	0.0239908	0.0618669	0.323847	59.8	151.8	81.1	107.4	2.66	40.39	7.72	8.79	5.05961e+06	5.33408e+06	5.1719e+06	1.14933e+07	1.31319e+07	2.34284e+07	6.46491e+06	7.01478e+06	7.54671e+06	9.29401e+06	8.96407e+06	1.0563e+07	Not Found	Peak Found	Not Found	High	Peak Found	Peak Found	High
FALSE	High	Master Protein	Glyma.02G247800.1.p	PTHR23147//PTHR23147:SF13 - SERINE/ARGININE RICH SPLICING FACTOR // SUBFAMILY NOT NAMED (1 of 2)	0	26.32	18	4	8	0	4	276	31.1	11.22	18.43	4	0.353	0.463	1.736	0.0282809	0.168376	0.415352	39.8	112.6	52.1	195.5	12.7	7.42	25.83	32.19	4.7684e+06	6.00305e+06	5.99149e+06	1.67461e+07	1.69701e+07	1.91142e+07	7.85541e+06	7.77835e+06	1.19266e+07	2.94534e+07	1.96731e+07	3.84632e+07	Peak Found	Peak Found	Not Found	Peak Found	Peak Found	High	Peak Found
FALSE	High	Master Protein	Glyma.16G140800.1.p	PTHR11375 - ACIDIC LEUCINE-RICH NUCLEAR PHOSPHOPROTEIN 32 (1 of 2)	0	46.138	21	6	21	4	4	462	51.6	3.97	50.97	6	0.319	0.238	1.596	0.0387076	0.0147067	1	40.5	126.8	30.2	202.5	19.77	52.89	25.16	10.26	1.26388e+06	1.75508e+06	1.87076e+06	4.91078e+06	5.49373e+06	1.20355e+07	1.015e+06	1.68499e+06	1.30613e+06	9.33701e+06	7.61171e+06	8.77073e+06	High	High	High	High	High	High	High
FALSE	High	Master Protein	Glyma.19G091800.1.p	PTHR31517:SF7 - PEROXIDASE 55 (1 of 2)	0	50.912	34	6	21	4	6	327	35	4.97	75.53	6	0.317	0.596	1.599	0.0065442	0.122917	0.686647	36.1	113.9	67.8	182.2	9.91	16.16	4.76	26.24	7.68308e+06	6.43934e+06	7.69224e+06	3.1333e+07	2.42724e+07	2.36443e+07	1.56804e+07	1.44547e+07	1.44539e+07	2.50447e+07	3.8807e+07	4.28457e+07	High	High	High	High	High	High	Peak Found
FALSE	High	Master Protein	Glyma.17G030200.1.p	PF00407 - Pathogenesis-related protein Bet v I family (Bet_v_1) (1 of 39)	0	45.095	56	7	32	0	6	158	16.7	5.05	72.69	7	0.317	0.357	0.765	0.0441796	0.0427103	1	52	164	58.5	125.5	6.37	19.03	22.28	38.91	1.54112e+07	1.38799e+07	13777381	3.65132e+07	4.37409e+07	5.3413e+07	1.99283e+07	1.28042e+07	1.55961e+07	3.34767e+07	2.73046e+07	5.60972e+07	Not Found	High	Peak Found	High	High	High	High
FALSE	High	Master Protein	Glyma.17G047200.1.p	PTHR10772:SF0 - 20 KDA CHAPERONIN, CHLOROPLASTIC (1 of 4)	0	134.925	66	14	123	0	3	201	21.2	6	361.11	14	0.297	0.462	1.31	0.031218	0.097103	1	38.7	130.4	60.2	170.7	18.46	48.57	7.69	26.13	7.59959e+06	9.32718e+06	6.4681e+06	2.56085e+07	2.41637e+07	5.39444e+07	1.18281e+07	1.30102e+07	1.11906e+07	2.30067e+07	3.95416e+07	3.35362e+07	High	High	High	High	High	High	Not Found
FALSE	High	Master Protein	Glyma.10G191400.1.p	K14396 - polyadenylate-binding protein 2 (PABPN1, PABP2) (1 of 6)	0	47.551	20	4	33	1	1	214	24.5	5.2	130.26	4	0.289	0.01	0.953	0.0149054	NA	0.96798	51.5	178.4	NA	170.1	3.31	6.28	NA	26.59	4.51347e+06	4.29556e+06	4.5778e+06	1.43952e+07	1.56342e+07	1.63079e+07	NA	NA	NA	9.37133e+06	1.60575e+07	1.49057e+07	High	High	High	High	High	High	High
FALSE	High	Master Protein	Glyma.04G190800.2.p	PTHR10173//PTHR10173:SF41 - METHIONINE SULFOXIDE REDUCTASE // SUBFAMILY NOT NAMED (1 of 1)	0	38.375	25	4	45	2	2	194	21.6	5.17	132.87	4	0.274	1.104	0.349	0.0147835	1	0.0307759	40.2	146.7	162	51.2	6.6	8.31	26.65	31.86	3.08173e+06	2.70203e+06	2.94096e+06	1.17347e+07	1.07286e+07	9.94495e+06	8.73431e+06	1.18476e+07	1.50666e+07	3.74494e+06	3.18839e+06	5.74902e+06	High	High	Not Found	High	High	High	High
FALSE	High	Master Protein	Glyma.05G213800.1.p	K02150 - V-type H+-transporting ATPase subunit E (ATPeV1E, ATP6E) (1 of 7)	0	132.015	54	13	110	0	2	232	26.7	6.44	327.99	13	0.274	0.01	1.558	0.0437965	NA	0.60121	38.7	141.3	NA	220.1	2.58	31.43	NA	34.98	2.28178e+06	2.27848e+06	2.38332e+06	8.33281e+06	6.95698e+06	1.25545e+07	NA	NA	NA	1.2981e+07	9.93896e+06	1.96421e+07	High	High	Not Found	High	High	High	Not Found
FALSE	High	Master Protein	Glyma.08G052600.1.p	PTHR11467//PTHR11467:SF33 - HISTONE H1/H5 // SUBFAMILY NOT NAMED (1 of 7)	0	39.29	17	5	33	4	4	413	44.2	10.92	93.64	5	0.268	0.362	0.834	0.00466928	0.00569763	0.945366	43.5	162.4	58.7	135.4	22.03	10.34	20.33	2.86	6.40545e+06	7.23862e+06	9.70227e+06	2.70475e+07	2.53511e+07	3.09561e+07	7.1058e+06	1.07045e+07	9.7857e+06	2.25586e+07	22333453	2.35581e+07	High	High	Not Found	High	High	High	High
FALSE	High	Master Protein	Glyma.01G181200.1.p	K11291 - nuclear autoantigenic sperm protein (NASP) (1 of 2)	0	107.003	40	16	81	3	3	475	50.3	4.5	210.74	16	0.265	1.416	0.663	0.0340097	1	0.96798	31.7	119.6	169.4	79.3	25.87	14.13	33.04	31.17	2.6027e+06	1.55826e+06	2.49129e+06	7.82692e+06	1.04097e+07	9.40156e+06	7.26105e+06	1.44216e+07	1.33148e+07	9.03729e+06	6.22883e+06	4.93157e+06	Peak Found	Peak Found	Not Found	Peak Found	Peak Found	High	Not Found
FALSE	High	Master Protein	Glyma.11G053700.1.p	PTHR11911//PTHR11911:SF109 - INOSINE-5-MONOPHOSPHATE DEHYDROGENASE RELATED // SUBFAMILY NOT NAMED (1 of 4)	0	128.476	54	11	170	1	1	228	25.1	8.38	480.57	11	0.264	0.476	0.738	0.00598592	0.0318628	0.377464	42.7	161.4	76.9	119.1	14.58	21.7	18.67	11.14	2.83562e+06	2.55221e+06	3.39106e+06	1.07266e+07	8.85139e+06	1.36168e+07	4.02467e+06	5885588	5.11077e+06	6.52962e+06	7.91382e+06	8.02829e+06	High	High	Peak Found	High	High	High	High
FALSE	High	Master Protein	Glyma.01G018800.1.p	PTHR31213:SF6 - ABSCISIC ACID RECEPTOR PYL1-RELATED (1 of 4)	0	16.881	20	4	15	2	3	221	24.3	5.99	41.53	4	0.242	0.493	0.524	0.0441796	0.456176	0.937085	42.9	177	87.3	92.8	13.76	11.41	6.5	63.38	1.16025e+06	1.51711e+06	1.44733e+06	5.14001e+06	6.46192e+06	5.97918e+06	2.82197e+06	3.20401e+06	2.94934e+06	7.8184e+06	3.13398e+06	2.6148e+06	Peak Found	High	Not Found	High	High	High	High
FALSE	High	Master Protein	Glyma.20G007400.1.p	PTHR13697:SF1 - PYROPHOSPHATE--FRUCTOSE 6-PHOSPHATE 1-PHOSPHOTRANSFERASE SUBUNIT ALPHA 1-RELATED (1 of 2)	0	10.747	6	3	7	2	2	617	67.6	6.96	5.16	3	0.233	0.316	0.263	0.0291784	0.0393602	0.0363677	51.5	220.7	69.7	58.1	27.54	29.26	33.65	10.36	3.6068e+06	4.43436e+06	2.50481e+06	1.0868e+07	1.54494e+07	1.98804e+07	2.82175e+06	4.8822e+06	5.76659e+06	4.06677e+06	4.81113e+06	4.01589e+06	High	Peak Found	Not Found	Peak Found	High	Peak Found	Peak Found
FALSE	High	Master Protein	Glyma.14G012200.1.p	PTHR12758:SF13 - GBF-INTERACTING PROTEIN 1 (1 of 4)	0	16.792	4	3	4	0	2	773	81.2	6.95	8	3	0.232	0.201	1.052	0.00886983	0.00341668	1	37.4	161	32.3	169.4	10.65	33.93	9.24	8.36	902206	1.06507e+06	880042	3.88668e+06	2.53806e+06	5.15723e+06	839022	697020	779732	4.08872e+06	3.96022e+06	4.62575e+06	Peak Found	Not Found	Not Found	Peak Found	Peak Found	High	Not Found
FALSE	High	Master Protein	Glyma.06G137700.1.p	K03626 - nascent polypeptide-associated complex subunit alpha (EGD2, NACA) (1 of 8)	0	144.859	60	8	160	2	2	223	24.2	4.45	562.66	8	0.223	0.11	0.736	0.0218448	0.00267668	0.92393	43.2	193.3	21.2	142.3	13.66	28.33	25.79	36.15	8.73556e+06	1.15091e+07	1.02958e+07	4.61273e+07	3.75077e+07	6.49435e+07	5.47514e+06	5.06158e+06	3.24775e+06	4.93236e+07	3.39538e+07	2.37107e+07	High	High	Peak Found	High	High	High	Not Found
FALSE	High	Master Protein	Glyma.17G132500.1.p	1.1.1.133 - dTDP-4-dehydrorhamnose reductase / dTDP-6-deoxy-L-mannose dehydrogenase (1 of 3)	0	13.815	11	3	11	3	3	302	33.7	6.54	21.76	3	0.218	0.711	0.512	0.0437965	1	0.469581	35.7	163.8	116.5	83.9	11.18	19.5	15.04	49.94	803859	967906	799906	3.69277e+06	2.68544e+06	3.95989e+06	2.54938e+06	3.32286e+06	2.62656e+06	1.12882e+06	3.16766e+06	1.89197e+06	High	High	High	High	High	Peak Found	High
FALSE	High	Master Protein	Glyma.18G249800.1.p	PTHR10795//PTHR10795:SF365 - PROPROTEIN CONVERTASE SUBTILISIN/KEXIN // SUBFAMILY NOT NAMED (1 of 8)	0	33.539	11	5	17	4	4	805	85.8	7.05	52.88	5	0.218	0.504	2.333	0.02675	0.251165	0.642368	21.6	98.6	49.7	230.1	22.49	54.54	14.57	26.06	1.13994e+06	1.70681e+06	1.22638e+06	4.98686e+06	5.61276e+06	1.25775e+07	2.82684e+06	3.56083e+06	2.75991e+06	1.30926e+07	1.51117e+07	8.81448e+06	High	High	High	High	High	High	Peak Found
FALSE	High	Master Protein	Glyma.04G227400.1.p	K03626 - nascent polypeptide-associated complex subunit alpha (EGD2, NACA) (1 of 8)	0	139.197	53	7	152	1	1	223	24.2	4.45	516.02	7	0.211	0.167	1.088	0.0307059	0.0121629	1	34.3	162.2	27.1	176.5	24.94	40.86	36.48	20.44	8.47978e+06	7.03903e+06	5.06986e+06	3.33182e+07	2.41474e+07	5.37305e+07	3.60851e+06	5557978	7.71172e+06	3.62585e+07	2.69054e+07	4.08008e+07	Not Found	High	Not Found	High	Peak Found	High	Not Found
FALSE	High	Master Protein	Glyma.07G032800.1.p	K02265 - cytochrome c oxidase subunit 5b (COX5B) (1 of 3)	0	58.539	28	7	58	0	4	162	17.7	5.38	167.08	7	0.208	0.202	0.868	0.0467434	0.0479004	1	36.6	175.6	35.5	152.4	26.08	49.59	17.33	52.05	8.40452e+06	5.09447e+06	8.37034e+06	3.14831e+07	4.01492e+07	7.79965e+07	8.11269e+06	7.44575e+06	1.03011e+07	5.53046e+07	1.78755e+07	3.48492e+07	High	High	Peak Found	High	High	High	Peak Found
FALSE	High	Master Protein	Glyma.02G033900.1.p	K00797 - spermidine synthase (speE, SRM) (1 of 10)	0	29.374	16	4	21	0	3	340	37.4	5	47.99	4	0.204	0.258	0.01	0.00662436	0.00641557	NA	55.8	273.6	70.6	NA	20.93	23.77	9.39	NA	910635	1.34399e+06	1.00674e+06	7.14965e+06	4.75379e+06	4.93498e+06	1.2735e+06	1160596	1.4005e+06	NA	NA	NA	High	High	High	High	High	Not Found	High
FALSE	High	Master Protein	Glyma.16G129900.1.p	K09578 - peptidyl-prolyl cis-trans isomerase NIMA-interacting 1 (PIN1) (1 of 2)	0	72.2	55	6	64	2	2	126	13.6	9.54	179.6	6	0.176	0.273	1.06	0.0187086	0.0284775	1	28	159.5	43.5	169	17.01	48.16	29.73	35.83	8.90718e+06	8.23463e+06	1.13037e+07	5.07164e+07	4.76367e+07	1.05914e+08	9.49303e+06	1.38374e+07	1.75991e+07	4.74467e+07	5.37353e+07	8.9696e+07	High	High	Peak Found	High	High	High	High
FALSE	High	Master Protein	Glyma.13G363500.1.p	PTHR18866//PTHR18866:SF99 - CARBOXYLASE:PYRUVATE/ACETYL-COA/PROPIONYL-COA CARBOXYLASE // SUBFAMILY NOT NAMED (1 of 4)	0	47.731	22	4	29	2	2	298	32.4	8.24	98.8	4	0.169	0.01	0.705	0.0331825	NA	1	36.1	213.5	NA	150.5	35.2	2.08	NA	45.88	1.77196e+06	3.69898e+06	2.74094e+06	1.62202e+07	1.67293e+07	1.60864e+07	NA	NA	NA	2.04852e+07	1.1435e+07	8.61869e+06	Not Found	High	High	Peak Found	High	High	Not Found
FALSE	High	Master Protein	Glyma.16G217600.1.p	PF00076 - RNA recognition motif. (a.k.a. RRM, RBD, or RNP domain) (RRM_1) (1 of 477)	0	14.631	16	3	31	1	3	180	20	9.99	69.57	3	0.166	0.231	0.698	0.0046587	0.0068605	0.953958	31.7	190.9	44.2	133.3	18.91	22.64	11.88	28.69	8.61617e+06	1.21963e+07	9.3097e+06	4.21224e+07	5.61444e+07	6.70015e+07	1.2057e+07	1.29896e+07	1.51604e+07	3.91888e+07	3.3253e+07	5.70466e+07	High	High	High	High	High	High	High
FALSE	High	Master Protein	Glyma.15G126000.1.p	PTHR12758:SF20 - PEPTIDASE-C1 DOMAIN-CONTAINING PROTEIN (1 of 6)	0	90.795	21	10	33	0	5	840	89.9	5.47	83.71	10	0.165	0.792	0.843	0.0240847	1	0.952408	23.6	142.8	113.1	120.4	17.64	11.83	17.26	45.67	5.30154e+06	6.59247e+06	4.682e+06	3.22376e+07	2.59757e+07	3.20397e+07	2.53727e+07	1.95343e+07	2.76186e+07	2.98824e+07	1.07796e+07	2.70167e+07	Peak Found	High	High	Peak Found	Not Found	High	Peak Found
FALSE	High	Master Protein	Glyma.03G017200.1.p	K12893 - splicing factor, arginine/serine-rich 4/5/6 (SFRS4_5_6) (1 of 6)	0	10.431	11	2	5	0	2	252	29.5	10.15	10.02	2	0.162	0.067	0.563	0.0181703	0.00330314	0.767734	36.1	223.3	14.9	125.7	28.24	49.95	20.64	6.52	897255	1.54912e+06	1.5482e+06	5.07326e+06	9.56882e+06	1.48985e+07	478502	638712	729407	5.38763e+06	5.84217e+06	5.14064e+06	Peak Found	Peak Found	Not Found	Peak Found	High	Peak Found	Not Found
FALSE	High	Master Protein	Glyma.01G080200.1.p	K01527 - nascent polypeptide-associated complex subunit beta (EGD1, BTF3) (1 of 4)	0	84.522	65	9	72	5	5	159	17.4	6.6	272.17	9	0.145	0.094	0.833	0.00210436	0.0009442	1	28	193	18.2	160.7	35.05	10.23	14.31	17.65	2.44155e+06	4.87045e+06	4.98522e+06	3.89638e+07	3.22459e+07	3.35131e+07	2.48058e+06	3.1631e+06	3.25952e+06	2.79122e+07	3.13242e+07	2.18951e+07	Not Found	High	Peak Found	High	Peak Found	High	Not Found
FALSE	High	Master Protein	Glyma.01G159500.1.p	K04523 - ubiquilin (UBQLN, DSK2) (1 of 4)	0	137.411	38	11	69	2	2	541	57.2	4.87	191.15	11	0.144	0.01	0.193	0.000800998	NA	0.000616436	43.2	299	NA	57.8	15.42	4.41	NA	12.24	1.82597e+06	2.02073e+06	2.45891e+06	1.39913e+07	1.47104e+07	1.34766e+07	NA	NA	NA	2.7037e+06	2.54646e+06	3.20705e+06	High	High	High	High	High	High	Not Found
FALSE	High	Master Protein	Glyma.05G106100.1.p	K03937 - NADH dehydrogenase (ubiquinone) Fe-S protein 4 (NDUFS4) (1 of 2)	0	49.496	49	6	29	3	4	146	16.3	9.8	57.57	6	0.141	0.076	1.202	0.00119594	0.000388638	1	23.2	165.4	12.5	198.9	5.12	15.29	26.55	20.98	7.95579e+06	7.77537e+06	8.56623e+06	4.97239e+07	5.66151e+07	6.72864e+07	3.27758e+06	5.60137e+06	4.28756e+06	5.3319e+07	6.80776e+07	8.17244e+07	Peak Found	High	Peak Found	Peak Found	Peak Found	High	Not Found
FALSE	High	Master Protein	Glyma.12G181400.1.p	PTHR31802:SF5 - HISTONE DEACETYLASE HDT2-RELATED (1 of 4)	0	17.389	10	4	20	3	3	307	33.3	5.02	41.42	4	0.124	0.156	0.285	0.023025	0.0364461	0.175057	31.7	255.6	39.8	72.9	27.16	33.38	43.6	32.47	4.064e+06	2.35116e+06	3.82166e+06	3.12651e+07	3.08341e+07	1.60011e+07	3.12859e+06	4.79697e+06	7.5922e+06	6.23893e+06	8.79572e+06	1.20964e+07	Not Found	Peak Found	High	Peak Found	High	High	Peak Found
FALSE	High	Master Protein	Glyma.02G101700.1.p	K18749 - protein LSM14 (LSM14, RAP55, SCD6) (1 of 6)	0	40.114	13	7	32	1	2	616	65.1	7.8	84.77	7	0.103	0.297	1.132	0.0369751	0.466472	1	16.2	158	46.9	178.8	47.81	27.09	54.77	38.51	1.0042e+06	1.60974e+06	2.66712e+06	1.56873e+07	9.69583e+06	1.67559e+07	4.66085e+06	3.48212e+06	9.58243e+06	1.17673e+07	1.77561e+07	2.59509e+07	Peak Found	Peak Found	Peak Found	Not Found	High	High	High
FALSE	High	Master Protein	Glyma.18G058200.1.p	K13098 - RNA-binding protein FUS (TLS, FUS) (1 of 4)	0	42.153	15	7	44	2	3	508	49.6	8.68	114.43	7	0.089	0.338	1.132	0.000800998	0.0143615	1	13.8	156.3	52.8	177	12.79	27.29	20.67	14.95	4.25705e+06	4.89548e+06	5.50639e+06	5.52972e+07	3.979e+07	6.97749e+07	2.02935e+07	1.867e+07	1.3395e+07	6.26223e+07	7.57727e+07	5.67804e+07	High	High	High	High	High	High	High
FALSE	High	Master Protein	Glyma.19G118800.1.p	K19054 - frataxin (FXN) (1 of 2)	0	12.995	19	3	6	1	3	191	21.8	5.96	11.98	3	0.088	0.476	0.382	0.00606189	0.53423	0.217097	18.1	205.4	97.9	78.5	21.15	26.86	45.29	12.46	1.72069e+06	1.12155e+06	1.56243e+06	1.76851e+07	1.08753e+07	1.86052e+07	8.42545e+06	5.07797e+06	1.30659e+07	6.76106e+06	5.92806e+06	7.61485e+06	Not Found	High	Peak Found	High	High	High	Not Found
FALSE	High	Master Protein	Glyma.12G082300.2.p	K02219 - cyclin-dependent kinase regulatory subunit CKS1 (CKS1) (1 of 3)	0	15.7	42	3	4	3	3	88	10.6	9.09	6.25	3	0.08	0.01	0.675	0.0358697	NA	0.906328	18.2	228	NA	153.8	17.76	25.89	NA	59.63	1.42308e+06	2.03992e+06	1.7489e+06	1.46597e+07	2.19382e+07	2.50107e+07	NA	NA	NA	1.48018e+07	5.65761e+06	2.28733e+07	Peak Found	Peak Found	Not Found	Peak Found	Peak Found	High	Not Found
FALSE	High	Master Protein	Glyma.04G251200.1.p	PTHR33558:SF1 - GLUTAREDOXIN-LIKE PROTEIN C5ORF63 (1 of 2)	0	19.07	30	3	6	0	3	138	14.8	8.94	18.54	3	0.079	0.81	0.157	0.0444502	1	0.204688	15.5	195.5	158.3	30.8	25.1	49.17	13.66	77.16	9.50896e+06	7.30123e+06	1.2139e+07	4.76424e+07	1.20295e+08	1.47796e+08	1.10205e+08	9.74026e+07	8.36808e+07	1.89317e+07	5.61539e+07	1.42243e+07	Peak Found	Peak Found	High	Peak Found	Peak Found	High	Peak Found
FALSE	High	Master Protein	Glyma.02G112400.1.p	K03263 - translation initiation factor 5A (EIF5A) (1 of 7)	0	47.457	38	6	26	2	2	159	17.4	5.99	83.35	6	0.057	0.324	0.748	0.023025	0.656543	1	10.8	187.8	60.9	140.5	6.9	69.96	6.32	15.7	1.59499e+06	1.76915e+06	1.82351e+06	3.08722e+07	8.2061e+06	4.94048e+07	1.04173e+07	1.00027e+07	9.19152e+06	2.31003e+07	2.18968e+07	2.91362e+07	High	Peak Found	High	Peak Found	High	High	Peak Found
FALSE	High	Master Protein	Glyma.15G219100.1.p	PTHR31810:SF6 - METACASPASE-4-RELATED (1 of 4)	0	114.479	37	15	98	3	3	415	45.2	5	277.09	15	0.043	0.176	0.341	0.000800998	0.00796263	0.046203	11.1	256.4	45.1	87.4	36.66	6.09	28.43	26.37	1.21651e+06	2.28159e+06	1.31615e+06	2.79123e+07	3.03786e+07	3.14666e+07	4.53333e+06	7.74404e+06	5.3432e+06	1.0348e+07	7.93735e+06	1.35108e+07	Peak Found	Peak Found	Peak Found	Not Found	Not Found	High	Not Found
[truncated: 7 more columns]

## Sheet: DEPs 1h
Checked	Protein FDR Confidence: Combined	Master	Accession	Description	Exp. q-value: Combined	Sum PEP Score	Coverage [%]	# Peptides	# PSMs	# Protein Unique Peptides	# Unique Peptides	# AAs	MW [kDa]	calc. pI	Score Sequest HT: Sequest HT	# Peptides (by Search Engine): Sequest HT	Abundance Ratio: (0_5h) / (0h)	Abundance Ratio: (1h) / (0h)	Abundance Ratio: (2h) / (0h)	Abundance Ratio Adj. P-Value: (0_5h) / (0h)	Abundance Ratio Adj. P-Value: (1h) / (0h)	Abundance Ratio Adj. P-Value: (2h) / (0h)	Abundances (Grouped): 0_5h	Abundances (Grouped): 0h	Abundances (Grouped): 1h	Abundances (Grouped): 2h	Abundances (Grouped) CV [%]: 0_5h	Abundances (Grouped) CV [%]: 0h	Abundances (Grouped) CV [%]: 1h	Abundances (Grouped) CV [%]: 2h	Abundances (Normalized): F1: Sample, 0_5h	Abundances (Normalized): F2: Sample, 0_5h	Abundances (Normalized): F8: Sample, 0_5h	Abundances (Normalized): F3: Sample, 0h	Abundances (Normalized): F4: Sample, 0h	Abundances (Normalized): F7: Sample, 0h	Abundances (Normalized): F5: Sample, 1h	Abundances (Normalized): F6: Sample, 1h	Abundances (Normalized): F9: Sample, 1h	Abundances (Normalized): F10: Sample, 2h	Abundances (Normalized): F11: Sample, 2h	Abundances (Normalized): F12: Sample, 2h	Found in Sample: [S1] F1: Sample, 0_5h	Found in Sample: [S2] F2: Sample, 0_5h	Found in Sample: [S8] F8: Sample, 0_5h	Found in Sample: [S3] F3: Sample, 0h	Found in Sample: [S4] F4: Sample, 0h	Found in Sample: [S7] F7: Sample, 0h	Found in Sample: [S5] F5: Sample, 1h
FALSE	High	Master Protein	Glyma.17G008500.1.p	NA	0	47.614	41	4	11	3	3	118	13.1	3.95	38.54	4	100	42.351	17.11	0.00662436	0.00991185	0.0338679	254.7	2.4	101.8	41.1	7.39	81.69	11.92	41.3	6.6172e+07	6.44172e+07	5.74232e+07	87023.9	1.01756e+06	608089	2.57533e+07	2.33407e+07	2.95405e+07	4.86852e+06	1.20464e+07	1.04045e+07	Not Found	Not Found	High	Peak Found	Peak Found	Peak Found	Peak Found
FALSE	High	Master Protein	Glyma.13G062700.1.p	K00703 - starch synthase (E2.4.1.21, glgA) (1 of 4)	0	54.786	18	10	37	4	4	776	86.5	5.9	101.11	10	12.118	35.816	8.507	0.023065	0.00410763	0.0260512	84.4	7	249.4	59.2	48.48	53.56	33.9	17.36	6.24449e+07	3.30952e+07	9.44888e+07	5.1531e+06	3.28701e+06	9.53984e+06	1.87574e+08	9.47392e+07	1.84565e+08	5.01816e+07	4.38389e+07	3.52697e+07	High	High	High	High	High	Peak Found	High
FALSE	High	Master Protein	Glyma.15G231900.1.p	K03950 - NADH dehydrogenase (ubiquinone) 1 alpha subcomplex subunit 6 (NDUFA6) (1 of 2)	0	25.62	42	5	28	2	2	131	15.1	9.31	57.42	5	15.916	23.756	8.731	0.0599453	0.0205922	0.134922	128.9	8.1	192.3	70.7	11.84	105.92	23.31	18.41	4.26649e+06	3.59669e+06	3.42277e+06	225977	189389	1.18728e+06	4.63277e+06	7.23008e+06	5.36834e+06	1.54821e+06	1.97292e+06	2.25156e+06	Not Found	Not Found	High	Peak Found	Peak Found	Peak Found	Not Found
FALSE	High	Master Protein	Glyma.10G058100.1.p	1.1.1.41 - Isocitrate dehydrogenase (NAD(+)) / Nicotinamide adenine dinucleotide isocitrate dehydrogenase (1 of 6)	0	123.897	42	13	87	1	3	359	39.4	7.49	261.56	13	23.141	15.208	7.861	0.00096361	0.00135581	0.00356161	196.1	8.5	128.9	66.6	22.18	35.3	14.02	30.95	2.01492e+07	2.19092e+07	1.40116e+07	736262	870728	1.40659e+06	1.46957e+07	1.10739e+07	1.32423e+07	5.05035e+06	6.84483e+06	9.42609e+06	High	High	Peak Found	High	High	Peak Found	High
FALSE	High	Master Protein	Glyma.06G128900.2.p	PF01535//PF12854//PF13041 - PPR repeat (PPR) // PPR repeat (PPR_1) // PPR repeat family (PPR_2) (1 of 52)	0	8.772	6	3	3	0	3	632	71.4	5.73	1.72	3	11.841	13.389	3.029	0.00450573	0.00356576	0.0653762	161.9	13.7	183	41.4	10.44	20.28	45.54	18.32	1.41814e+07	1.58514e+07	1.74872e+07	1.33873e+06	1.64914e+06	1.09806e+06	1.79237e+07	8.18088e+06	2.27307e+07	3.55263e+06	5.07204e+06	4.05488e+06	Peak Found	Peak Found	High	Peak Found	Peak Found	Not Found	Peak Found
FALSE	High	Master Protein	Glyma.09G246300.1.p	PTHR11177:SF167 - RHODANESE-LIKE DOMAIN-CONTAINING PROTEIN 4, CHLOROPLASTIC (1 of 4)	0	34.01	26	6	9	0	6	342	37.9	8.54	24.88	6	1.197	10.825	8.976	1	0.0488938	0.113646	21.8	18.2	196.8	163.2	7.08	27.55	42.65	62.61	1.39557e+06	1.219e+06	1.36232e+06	981355	1.64287e+06	1.13858e+06	1.62063e+07	6.35965e+06	1.23248e+07	2.39433e+06	1.02202e+07	1.21609e+07	Peak Found	Not Found	High	High	Peak Found	High	Not Found
FALSE	High	Master Protein	Glyma.13G176300.1.p	PTHR11527:SF158 - 17.6 KDA CLASS I HEAT SHOCK PROTEIN 1-RELATED (1 of 20)	0	43.19	40	6	24	0	4	161	18.5	8.34	64.36	6	2.628	10.091	14.978	0.848481	0.0115579	0.00349374	36.6	13.9	140.7	208.8	25.08	59.4	10.33	35.93	3.43363e+07	2.04518e+07	2.9015e+07	9.40467e+06	1.10406e+07	2.6132e+07	1.231e+08	1.11407e+08	1.00068e+08	1.6537e+08	144839976	2.75237e+08	Peak Found	Peak Found	High	Peak Found	Peak Found	Peak Found	High
FALSE	High	Master Protein	Glyma.02G087800.1.p	PTHR12599//PTHR12599:SF8 - PTERIN-4-ALPHA-CARBINOLAMINE DEHYDRATASE // SUBFAMILY NOT NAMED (1 of 2)	0	21.149	30	5	25	3	3	215	23.5	7.8	58.97	5	13.477	8.604	17.887	0.000879562	0.00135581	0.000275545	131.6	9.8	84	174.6	14.27	6.55	42.78	19.33	5.18073e+07	3.9426e+07	4.29389e+07	3.24227e+06	2.86607e+06	3.18616e+06	2.74127e+07	21798044	4.81605e+07	5.51263e+07	5.69899e+07	7.7113e+07	High	High	Peak Found	High	High	Not Found	Peak Found
FALSE	High	Master Protein	Glyma.20G009200.1.p	NA	0	14.846	9	4	7	0	4	511	55.1	4.91	15.78	4	6.567	8.4	7.186	0.000800998	0.000388638	0.000275672	113.5	17.3	145.1	124.1	24.33	7.58	11.78	17.46	1.51299e+07	1.26685e+07	2.0311e+07	2.06248e+06	2.30383e+06	2.39239e+06	1.58389e+07	1.93533e+07	1.97632e+07	1.65565e+07	2.1132e+07	1.52676e+07	Peak Found	Peak Found	High	High	Not Found	Peak Found	Peak Found
FALSE	High	Master Protein	Glyma.06G325100.2.p	K01061 - carboxymethylenebutenolidase (E3.1.1.45) (1 of 3)	0	17.172	13	4	27	2	4	310	34.2	5.35	55.02	4	3.097	8.256	2.557	0.0827438	0.00544654	0.13384	83.1	26.8	221.5	68.6	32.39	25.25	16.83	35.29	3.92989e+07	4.54885e+07	7.10366e+07	1.4688e+07	2.15326e+07	1.385e+07	1.32169e+08	9.42821e+07	1.21262e+08	2.75182e+07	5.5522e+07	3.75617e+07	High	High	High	High	High	Peak Found	High
FALSE	High	Master Protein	Glyma.09G230800.1.p	K13095 - splicing factor 1 (SF1) (1 of 4)	0	11.993	6	3	3	0	3	780	83.8	6.15	4.8	3	12.631	8.001	8.443	0.0116191	0.0248834	0.0120769	168	13.3	106.4	112.3	21.71	29.79	57.5	13.57	1.45328e+07	2.20658e+07	1.68046e+07	1.78851e+06	977237	1.33037e+06	1.62079e+07	4.28255e+06	1.06444e+07	1.40682e+07	1.11886e+07	1.12322e+07	Not Found	Not Found	Peak Found	Peak Found	Peak Found	High	Not Found
FALSE	High	Master Protein	Glyma.04G199200.2.p	K04649 - ubiquitin-conjugating enzyme (huntingtin interacting protein 2) (HIP2, UBC1) (1 of 2)	0	16.773	20	3	14	2	3	192	21.1	4.92	24.88	3	1.671	7.411	2.145	0.458149	0.000766736	0.0863796	54.7	32.7	242.4	70.2	3.26	13	30.05	16.06	3.62922e+06	3.40313e+06	3.48727e+06	2.05026e+06	2.57064e+06	2.08631e+06	1.22629e+07	1.54609e+07	2.20406e+07	4.47601e+06	4.7358e+06	3.45352e+06	High	High	Peak Found	High	High	Not Found	Peak Found
FALSE	High	Master Protein	Glyma.01G002600.1.p	3.6.1.9 - Nucleotide diphosphatase / Nucleotide pyrophosphatase (1 of 4)	0	13.006	6	3	13	2	2	462	51	6.68	25.22	3	6.3	7.218	2.279	0.0156358	0.00796263	0.145575	150	23.8	171.9	54.3	10.49	45.51	23.39	26.12	9.87531e+06	8.0157e+06	9.27994e+06	2.364e+06	931480	1.47291e+06	1.06318e+07	7.45271e+06	1.20362e+07	3.35623e+06	4.78653e+06	2.94784e+06	High	High	High	Peak Found	Peak Found	Not Found	High
FALSE	High	Master Protein	Glyma.19G128600.3.p	PTHR10277//PTHR10277:SF38 - HOMOCITRATE SYNTHASE-RELATED // SUBFAMILY NOT NAMED (1 of 1)	0	18.267	14	5	29	0	3	343	35.7	7.71	32.8	5	0.492	6.914	0.01	0.420708	0.00902977	NA	23.4	47.6	329	NA	32.19	6.76	36.73	NA	3.2843e+06	4.23639e+06	6.16721e+06	9.43824e+06	8.60811e+06	8.28812e+06	5.9518e+07	4.76055e+07	9.52066e+07	NA	NA	NA	High	Peak Found	Peak Found	High	High	Not Found	High
FALSE	High	Master Protein	Glyma.03G222200.1.p	PF06108 - Protein of unknown function (DUF952) (DUF952) (1 of 2)	0	9.369	19	2	9	1	2	120	13.4	5.1	17.44	2	4.47	6.788	7.374	0.24405	0.0363895	0.0200581	91.1	20.4	138.3	150.2	35.47	53.88	24.87	8.42	3.09788e+06	6.02873e+06	6.51845e+06	1.34863e+06	1.19173e+06	2.98296e+06	5.95283e+06	9.81534e+06	9.15412e+06	1.0712e+07	9.04706e+06	9.94443e+06	High	High	High	High	High	Peak Found	High
FALSE	High	Master Protein	Glyma.19G174700.1.p	PF07719//PF13174 - Tetratricopeptide repeat (TPR_2) // Tetratricopeptide repeat (TPR_6) (1 of 1)	0	48.813	30	11	30	7	8	351	39.9	6.48	60.99	11	4.186	6.627	4.394	0.00253573	0.000477625	0.0014767	103.3	24.7	163.5	108.5	10.56	10.79	18.05	22.48	2.21825e+07	2.12125e+07	2.5834e+07	5.29862e+06	6.16211e+06	5.02613e+06	3.51114e+07	3.25821e+07	4.54275e+07	1.80326e+07	2.84962e+07	2.32835e+07	High	High	High	Peak Found	High	Not Found	High
FALSE	High	Master Protein	Glyma.08G335300.1.p	K11338 - RuvB-like protein 2 [EC:3.6.4.12] (RUVBL2, RVB2, INO80J) (1 of 2)	0	27.906	19	7	10	2	7	465	51	5.47	15.47	7	5.504	6.442	4.813	0.00137388	0.000813054	0.00115626	124	22.5	145.1	108.4	15.28	17.69	13.14	22.1	1.62667e+07	1.32674e+07	1.80683e+07	2.95533e+06	3.03457e+06	2.16482e+06	1.51546e+07	1.90382e+07	1.9377e+07	1.15012e+07	1.42226e+07	1.79048e+07	High	Peak Found	High	High	Not Found	Not Found	High
FALSE	High	Master Protein	Glyma.10G200100.1.p	PTHR10343:SF58 - PHOSPHOGLUCAN PHOSPHATASE DSP4, CHLOROPLASTIC (1 of 2)	0	42.569	21	8	41	2	2	371	41.9	5.78	109.47	8	6.144	6.206	2.472	0.00205628	0.0016038	0.0216856	155.3	25.3	156.9	62.5	21.43	11.63	21.29	27.95	1.22942e+07	1.86659e+07	1.44377e+07	1.91367e+06	2.36752e+06	2.34994e+06	1.32641e+07	1.96497e+07	1.45838e+07	4.88166e+06	8.30303e+06	5.80817e+06	Peak Found	High	High	High	Peak Found	Not Found	Peak Found
FALSE	High	Master Protein	Glyma.08G130400.1.p	NA	0	8.419	17	3	7	1	3	139	14.9	9.47	8.18	3	5.821	6.187	7.86	0.0711735	0.0384259	0.031758	111.6	19.2	118.6	150.7	27	48.61	66.1	16.43	1.5475e+07	1.43926e+07	2.31437e+07	4.65807e+06	1.78168e+06	2.65828e+06	1.64458e+07	1.04805e+07	3.75045e+07	1.6561e+07	2.08947e+07	2.30744e+07	Peak Found	Peak Found	High	Peak Found	Peak Found	Not Found	Peak Found
FALSE	High	Master Protein	Glyma.12G010300.2.p	K14005 - protein transport protein SEC31 (SEC31) (1 of 2)	0	76.487	15	12	45	0	1	1097	119.3	5.15	113.57	12	8.445	6.161	2.712	0.0156358	0.0224102	0.162391	184.4	21.8	134.5	59.2	8.94	17.64	16.16	62.74	2.70987e+07	2.44191e+07	2.27126e+07	2.78671e+06	2.89166e+06	3.80012e+06	1.43134e+07	1.78142e+07	1.98502e+07	7.84212e+06	1.63214e+07	4.66057e+06	Peak Found	High	Peak Found	Peak Found	High	Peak Found	Peak Found
FALSE	High	Master Protein	Glyma.10G123200.1.p	K11092 - U2 small nuclear ribonucleoprotein A' (SNRPA1) (1 of 2)	0	54.976	42	9	41	0	9	287	32.7	5.58	120.69	9	3.149	6.062	6.969	0.106674	0.0136044	0.0101355	73.3	23.3	141.1	162.3	37.33	43.74	33.58	14.79	4.85064e+07	6.28336e+07	9.93548e+07	1.99528e+07	2.56094e+07	9.71106e+06	1.20956e+08	9.58967e+07	1.82819e+08	139059529	1.17487e+08	1.58378e+08	High	High	High	High	High	Peak Found	High
FALSE	High	Master Protein	Glyma.17G132300.1.p	K01641 - hydroxymethylglutaryl-CoA synthase (E2.3.3.10) (1 of 5)	0	12.807	8	3	3	0	3	460	51	6.42	3.36	3	0.96	5.931	6.243	1	0.00356576	0.00301859	27.2	28.3	167.9	176.7	9.22	33.26	16.05	21.91	1.56735e+06	1.33622e+06	1.34656e+06	2.07047e+06	1.40322e+06	1.08055e+06	9.96377e+06	8.32261e+06	7.2515e+06	8.76067e+06	5.99384e+06	9.23973e+06	High	Peak Found	Not Found	Peak Found	Peak Found	Not Found	Peak Found
FALSE	High	Master Protein	Glyma.09G125800.1.p	PF11341 - Protein of unknown function (DUF3143) (DUF3143) (1 of 2)	0	22.019	31	4	30	2	4	168	18.9	6.09	59.36	4	1.369	5.465	4.252	1	0.0222223	0.0216856	45.3	33.1	180.9	140.7	25.47	25.87	38.27	18.73	8.79947e+06	1.21376e+07	1.4869e+07	7.95786e+06	8.86634e+06	1.27601e+07	4.84536e+07	26299066	6.01999e+07	3.76989e+07	3.71271e+07	5.10148e+07	High	High	High	High	High	High	High
FALSE	High	Master Protein	Glyma.19G223000.1.p	K19355 - mannan endo-1,4-beta-mannosidase (MAN) (1 of 20)	0	30.007	14	4	16	1	4	410	46.2	8	37.88	4	23.78	5.389	6.263	0.000800998	0.00884838	0.00433586	261.1	11	59.2	68.8	26.93	33.13	13.51	14.4	4.53786e+07	2.61229e+07	4.10648e+07	2.89503e+06	1.66207e+06	1.72688e+06	9.30575e+06	7.58432e+06	9.91044e+06	8.8149e+06	1.17678e+07	1.08151e+07	High	High	Peak Found	High	High	Not Found	High
FALSE	High	Master Protein	Glyma.10G154300.1.p	PF09353 - Domain of unknown function (DUF1995) (DUF1995) (1 of 11)	0	33.526	28	8	24	2	8	344	38.7	4.91	48.81	8	4.955	5.379	3.671	0.0100622	0.00432356	0.00812482	132.1	26.7	143.4	97.9	18.3	25.45	16.88	21.76	3.69767e+07	2.64942e+07	3.72969e+07	7.46253e+06	1.06952e+07	6.72612e+06	4.01443e+07	3.25867e+07	4.58959e+07	2.73939e+07	3.60563e+07	2.37436e+07	High	High	High	High	Peak Found	Not Found	High
FALSE	High	Master Protein	Glyma.11G045300.1.p	2.6.1.88 - Methionine transaminase / Methionine-oxo-acid transaminase (1 of 5)	0	75.334	30	9	46	4	4	412	45.1	6.4	118.89	9	3.561	5.238	1.497	0.138682	0.0363895	0.96798	126.1	35.4	185.5	53	25.03	9.83	23.09	59.09	1.74499e+07	1.31393e+07	2.18969e+07	5.04762e+06	4.18208e+06	4.89966e+06	2.8935e+07	2.56641e+07	1.80402e+07	3.79814e+06	1.33301e+07	7.33521e+06	High	High	High	High	High	Peak Found	High
FALSE	High	Master Protein	Glyma.18G022500.1.p	K15296 - alpha-soluble NSF attachment protein (NAPA, SNAPA, SEC17) (1 of 5)	0	60.293	36	9	60	3	3	289	32.7	5.17	156.37	9	0.878	5.087	1.792	1	0.0204974	0.41582	40.1	45.7	232.4	81.8	17.19	50.47	24.34	5.55	4.63244e+06	6.45962e+06	6.21312e+06	1.02579e+07	7.07299e+06	3.31763e+06	2.55621e+07	3.59836e+07	4.22293e+07	1.31178e+07	1.17566e+07	1.26745e+07	High	High	High	High	High	Peak Found	Peak Found
FALSE	High	Master Protein	Glyma.09G248300.1.p	PTHR11075:SF46 - PROTEIN HIGH CHLOROPHYLL FLUORESCENT 109 (1 of 1)	0	6.471	7	3	10	3	3	456	51	5.53	0	3	2.292	4.967	4.176	0.0916035	0.00975021	0.00861284	73.7	32.2	159.8	134.3	24.11	6.46	31.49	18.64	1.75465e+07	1.16771e+07	1.19606e+07	5.12873e+06	5.76978e+06	5.21768e+06	2.84869e+07	1.48159e+07	2.59146e+07	1.78406e+07	2.17867e+07	2.59938e+07	Peak Found	High	Peak Found	High	High	Peak Found	Peak Found
FALSE	High	Master Protein	Glyma.03G253300.1.p	K11091 - U1 small nuclear ribonucleoprotein A (SNRPA) (1 of 2)	0	25.94	24	5	16	0	5	241	26.9	9.44	38.85	5	8.788	4.929	5.296	0.0106742	0.0120077	0.0156976	175.6	20	98.5	105.8	23.19	2.27	60.94	21.62	1.59053e+07	1.27997e+07	9.9333e+06	1.4565e+06	1.4527e+06	1.51251e+06	7.17945e+06	6.62551e+06	1.81261e+07	6.82317e+06	1.02661e+07	7.71347e+06	High	High	High	Peak Found	High	Not Found	High
FALSE	High	Master Protein	Glyma.13G003700.1.p	K09486 - hypoxia up-regulated 1 (HYOU1) (1 of 2)	0	27.244	8	7	20	2	7	891	99	5.45	33.04	7	2.781	4.89	3.754	0.163874	0.0230893	0.0315353	89.5	32.2	157.4	120.8	37.99	29.51	28.74	12.61	1.57021e+07	2.26867e+07	3.3838e+07	6.48676e+06	8.15686e+06	1.15431e+07	2.58815e+07	3.98898e+07	4.71713e+07	3.06219e+07	3.70019e+07	2.94109e+07	High	High	High	High	High	Peak Found	High
FALSE	High	Master Protein	Glyma.03G014300.1.p	K15095 - (+)-neomenthol dehydrogenase (E1.1.1.208) (1 of 12)	0	76.365	38	11	46	5	5	299	32.4	5.55	121.21	11	3.628	4.826	3.047	0.0276305	0.00608646	0.0190637	116.1	32	154.4	97.5	8.62	35.77	22.42	20.94	2.57057e+07	2.2536e+07	2.66401e+07	1.04593e+07	5.11583e+06	7.0863e+06	3.04175e+07	3.42001e+07	4.62891e+07	2.15887e+07	3.02591e+07	2.12642e+07	High	High	High	High	High	Not Found	Peak Found
FALSE	High	Master Protein	Glyma.06G018700.1.p	NA	0	23.394	14	6	22	2	2	449	51.5	6.33	28.99	6	4.037	4.819	3.031	0.0276305	0.0112954	0.0255228	125.3	31	149.6	94.1	20.82	18.22	30.43	20.12	4.1918e+06	6.17878e+06	6.18458e+06	1.26129e+06	1.82163e+06	1.53072e+06	8.29438e+06	4.40028e+06	7.37589e+06	4.63959e+06	6.01418e+06	4.09501e+06	Peak Found	Peak Found	High	Peak Found	Peak Found	Not Found	High
FALSE	High	Master Protein	Glyma.04G198900.1.p	K17780 - mitochondrial import inner membrane translocase subunit TIM8 (TIM8) (1 of 2)	0	13.765	35	3	10	0	3	78	9	5.33	17.21	3	12.824	4.719	8.764	0.000180856	0.000679396	0.00012473	187.9	14.6	69.1	128.4	0.99	3.76	27.89	10.24	8.46517e+07	8.4963e+07	8.33881e+07	6.60092e+06	6.80074e+06	6.30936e+06	4.49715e+07	2.66396e+07	3.1147e+07	6.15862e+07	5.78477e+07	5.02197e+07	Peak Found	Peak Found	High	Peak Found	Peak Found	Peak Found	Not Found
FALSE	High	Master Protein	Glyma.15G112500.1.p	PTHR31906:SF5 - PLASTID-LIPID-ASSOCIATED PROTEIN 3, CHLOROPLASTIC-RELATED (1 of 3)	0	70.244	41	9	54	4	4	306	33.3	5.86	152.01	9	3.837	4.691	8.025	0.0331743	0.0124504	0.00362904	87.4	22.8	106.9	182.9	18.31	13.76	46.29	19.25	2.83821e+07	2.37573e+07	3.42819e+07	7.64505e+06	7.39638e+06	5.8731e+06	2.2109e+07	3.46994e+07	5.67216e+07	4.29196e+07	5.93535e+07	6.27043e+07	High	High	High	High	High	Not Found	High
FALSE	High	Master Protein	Glyma.08G349900.1.p	KOG4374 - RNA-binding protein Bicaudal-C (1 of 9)	0	21.891	35	6	15	0	4	201	22.7	9.57	27.48	6	2.154	4.53	2.802	0.340516	0.017536	0.13056	82.2	38.1	172.8	106.9	6.28	22.15	2.53	47.7	2.33142e+07	2.58209e+07	2.62254e+07	7.99158e+06	1.19887e+07	1.2222e+07	5.43058e+07	5.67065e+07	5.42735e+07	3.35967e+07	4.30986e+07	1.45923e+07	Peak Found	Peak Found	Peak Found	Peak Found	Peak Found	High	Peak Found
FALSE	High	Master Protein	Glyma.13G119900.1.p	PTHR21230//PTHR21230:SF35 - VESICLE TRANSPORT V-SNARE PROTEIN VTI1-RELATED // SUBFAMILY NOT NAMED (1 of 2)	0	18.426	12	3	19	0	3	269	30.3	6.58	42.27	3	6.441	4.415	4.007	0.00114245	0.00242438	0.00132901	162.4	25.2	111.3	101	12.18	2.57	14.7	29.89	3.37309e+07	4.13505e+07	4.25318e+07	6.21991e+06	6.42023e+06	6.54579e+06	2.83471e+07	2.44616e+07	3.28454e+07	2.5557e+07	4.16827e+07	2.57281e+07	High	Peak Found	High	Peak Found	High	Peak Found	High
FALSE	High	Master Protein	Glyma.19G244500.1.p	NA	0	55.123	41	11	27	9	9	326	35.8	4.6	55.2	11	3.28	4.289	2.93	0.0171403	0.00809847	0.0239985	114.1	34.8	149.2	101.9	35.36	16.53	22.16	20.7	4.6089e+07	4.63451e+07	8.17852e+07	1.10694e+07	1.41294e+07	1.54293e+07	6.0597e+07	4.91582e+07	7.65645e+07	4.1398e+07	5.2844e+07	3.52403e+07	High	High	High	Peak Found	High	Peak Found	Peak Found
FALSE	High	Master Protein	Glyma.13G365500.1.p	PTHR33729:SF1 - METHYL-CPG-BINDING DOMAIN-CONTAINING PROTEIN 10 (1 of 2)	0	187.762	63	19	120	0	14	276	30.4	4.59	442.46	19	4.517	4.245	4.417	0.0642564	0.0440303	0.0585858	127.4	28.2	119.8	124.6	9.83	52.67	17.21	26.76	1.46711e+08	1.23701e+08	148157092	2.39895e+07	3.24776e+07	6.41775e+07	1.15479e+08	137872143	1.63254e+08	8.63315e+07	1.44974e+08	1.43448e+08	High	High	High	High	High	High	High
FALSE	High	Master Protein	Glyma.01G214700.1.p	PTHR18063 - NF-E2 INDUCIBLE PROTEIN (1 of 5)	0	10.885	3	2	11	0	2	726	79.6	4.65	26.18	2	2.124	4.17	1.044	0.561838	0.0210272	1	101.9	48	200	50.1	42.24	21.87	7.14	24.03	2.41572e+06	4.82531e+06	6.12456e+06	1.60395e+06	2.27163e+06	2.4972e+06	9.47167e+06	9.02363e+06	1.03719e+07	1.66306e+06	2.72666e+06	2.37261e+06	High	High	High	High	High	Peak Found	High
FALSE	High	Master Protein	Glyma.11G084000.1.p	1.1.1.41 - Isocitrate dehydrogenase (NAD(+)) / Nicotinamide adenine dinucleotide isocitrate dehydrogenase (1 of 6)	0	56.973	33	9	31	0	3	364	39.3	6.93	83.49	9	3.617	4.113	2.832	0.0821166	0.0277281	0.0358639	125.1	34.6	142.3	98	24.43	6.45	21.74	48.19	4.19266e+06	6.51763e+06	6.78025e+06	1.80185e+06	1.89602e+06	1.66665e+06	7.41135e+06	5.44628e+06	8.49918e+06	5.10232e+06	1.04545e+07	4.61384e+06	High	High	Peak Found	High	Not Found	Not Found	High
FALSE	High	Master Protein	Glyma.02G073000.1.p	PTHR21087:SF4 - INACTIVE SHIKIMATE KINASE LIKE 1, CHLOROPLASTIC-RELATED (1 of 2)	0	24.791	21	6	24	0	6	280	30.8	6.57	53.21	6	2.936	3.758	2.317	0.0291784	0.00544654	0.0613645	117.3	40	150.2	92.6	11.67	11.14	30.67	25.01	2.47672e+07	3.09871e+07	2.65539e+07	1.05468e+07	9.04501e+06	8.5373e+06	3.39171e+07	3.39953e+07	5.58772e+07	1.58618e+07	2.64022e+07	2.09599e+07	High	High	High	High	High	Peak Found	High
FALSE	High	Master Protein	Glyma.05G055600.1.p	K09553 - stress-induced-phosphoprotein 1 (STIP1) (1 of 4)	0	58.026	22	12	53	5	5	567	63.4	6.11	145.34	12	1.305	3.714	2.503	1	0.0228056	0.0945845	61.3	46.9	174.3	117.5	7.04	22	1.03	43.85	1.18938e+07	1.3518e+07	1.21161e+07	9.28182e+06	7.88117e+06	1.20946e+07	3.39914e+07	3.44692e+07	3.46857e+07	2.32334e+07	3.54959e+07	1.42477e+07	Peak Found	Not Found	High	Peak Found	Not Found	High	Peak Found
FALSE	High	Master Protein	Glyma.15G134800.1.p	K02935 - large subunit ribosomal protein L7/L12 (RP-L7, MRPL12, rplL) (1 of 10)	0	7.251	18	3	4	0	3	192	21.3	9.11	1.61	3	2.257	3.536	1.2	0.216447	0.0204974	1	113	50	176.9	60.1	4.31	20.88	8.16	39.53	2.18464e+07	2.06369e+07	2.24751e+07	1.35822e+07	9.6775e+06	9.57157e+06	3.05586e+07	3.42168e+07	3.59166e+07	9.03333e+06	1.91224e+07	1.16171e+07	Peak Found	Peak Found	High	Peak Found	Peak Found	High	Peak Found
FALSE	High	Master Protein	Glyma.05G037400.1.p	K13343 - peroxin-14 (PEX14) (1 of 2)	0	24.645	11	4	18	0	4	502	54.6	5.81	73.36	4	7.15	3.486	1.8	0.00119594	0.00468486	0.178081	212.9	29.8	103.8	53.6	19.18	18.26	17.02	14.3	24472218	1.68746e+07	2.35715e+07	3.2965e+06	3.09097e+06	4.30689e+06	1.14901e+07	1.13009e+07	1.51178e+07	4.92903e+06	6.57933e+06	5.93224e+06	High	High	High	High	High	High	High
FALSE	High	Master Protein	Glyma.03G080200.1.p	NA	0	43.368	47	6	70	0	3	197	20.9	4.86	197.17	6	3.828	3.418	2.452	0.02675	0.0202754	0.109661	143.1	37.4	127.8	91.7	10.92	32.56	21.5	20.56	1.01163e+08	8.19472e+07	9.7558e+07	2.31143e+07	2.54879e+07	4.1022e+07	7.62402e+07	87119983	1.14911e+08	4.71694e+07	7.18e+07	6.24982e+07	High	High	High	High	High	High	High
FALSE	High	Master Protein	Glyma.17G073800.1.p	K01255 - leucyl aminopeptidase (CARP, pepA) (1 of 3)	0	147.119	42	18	122	2	3	570	59.8	7.14	356.67	18	2.187	3.407	1.711	0.0243113	0.00240858	0.155206	105.3	48.2	164.1	82.4	8.28	10.82	5.12	21.99	7.42786e+06	6.60422e+06	7.77667e+06	3.39575e+06	3.06839e+06	3.80779e+06	1.21755e+07	1.09906e+07	1.1571e+07	5.80896e+06	3.9186e+06	6.00892e+06	High	High	Peak Found	High	High	Not Found	High
FALSE	High	Master Protein	Glyma.07G239200.1.p	4.2.1.55 - 3-hydroxybutyryl-CoA dehydratase / Crotonase (1 of 6)	0	10.609	17	4	7	2	4	253	27.7	9.07	10.93	4	2.204	3.355	0.685	0.298014	0.0329046	1	121.7	55.2	185.3	37.8	19.64	34.47	28.6	36.13	8.6364e+06	6.29906e+06	9.33235e+06	4.15366e+06	2.03515e+06	3.91921e+06	1.81981e+07	1.03556e+07	1.31485e+07	2.68504e+06	4.63959e+06	2.50537e+06	Peak Found	High	Peak Found	High	High	Not Found	High
FALSE	High	Master Protein	Glyma.07G008000.2.p	PTHR11043//PTHR11043:SF6 - ZETA-COAT PROTEIN // SUBFAMILY NOT NAMED (1 of 3)	0	22.09	26	3	9	0	3	180	20.1	4.86	26.84	3	7.798	3.163	3.4	0.0106742	0.04521	0.0583919	203.1	26	82.4	88.5	26	11.32	51.67	9.78	3.0811e+07	4.35932e+07	5.27523e+07	5.54527e+06	5.59029e+06	6.73538e+06	17683188	1.34881e+07	3.49836e+07	1.90091e+07	1.96332e+07	1.62694e+07	High	High	Peak Found	High	High	Not Found	Peak Found
FALSE	High	Master Protein	Glyma.13G163200.1.p	3.6.1.25//3.6.1.3 - Adenosinetriphosphatase / Triphosphatase (1 of 4)	0	6.882	14	2	3	0	2	199	22.3	5.39	4.6	2	1.704	3.055	2.687	0.0771158	0.00468486	0.00477929	80.7	47.4	144.7	127.3	28.16	4.72	10.98	8.34	2.33686e+06	3.41145e+06	2.02048e+06	1.3713e+06	1.26607e+06	1.37943e+06	4.18916e+06	4.51609e+06	3.62445e+06	4.15959e+06	3.5585e+06	3.68445e+06	Peak Found	Peak Found	Not Found	Peak Found	Peak Found	Not Found	Peak Found
FALSE	High	Master Protein	Glyma.12G232200.1.p	K02963 - small subunit ribosomal protein S18 (RP-S18, MRPS18, rpsR) (1 of 2)	0	12.465	29	5	17	4	5	96	11.4	11.65	26.12	5	2.075	3.028	0.551	0.0267686	0.00356576	0.173718	124.7	60.1	182	33.1	11.43	13.58	1.83	24.18	3.73259e+07	3.38588e+07	2.96519e+07	1.63164e+07	1.7184e+07	1.31692e+07	5.05202e+07	4.94008e+07	4.87268e+07	8.99116e+06	8.82479e+06	1.32419e+07	High	High	Peak Found	High	High	Peak Found	High
FALSE	High	Master Protein	Glyma.05G168900.1.p	KOG2770 - Aminomethyl transferase (1 of 1)	0	24.878	12	4	13	2	4	423	46.1	7.21	41	4	3.567	3.003	5.792	0.0126735	0.0244245	0.00213415	106.8	29.9	89.9	173.4	17.12	5.35	26.59	19.87	2.01342e+07	1.43362e+07	1.66635e+07	4.67152e+06	4.48546e+06	4.98477e+06	1.40287e+07	9.12578e+06	1.57844e+07	2.71576e+07	2.70562e+07	1.87402e+07	High	High	Peak Found	High	High	Not Found	High
FALSE	High	Master Protein	Glyma.11G254300.1.p	K17285 - selenium-binding protein 1 (SELENBP1) (1 of 4)	0	123.524	45	17	65	3	3	480	53.1	6.18	172.53	17	2.108	2.834	0.431	0.0065442	0.00124904	0.00535928	132.3	62.8	177.9	27	12.12	13.56	13.47	2.9	7.09011e+06	8.43605e+06	6.72979e+06	3.36294e+06	2.66715e+06	3.44768e+06	9.53164e+06	8646782	1.12446e+07	1.43503e+06	1.44802e+06	1.51434e+06	High	High	Not Found	High	High	Not Found	High
FALSE	High	Master Protein	Glyma.04G018200.1.p	PF05542 - Protein of unknown function (DUF760) (DUF760) (1 of 16)	0	90.839	41	13	64	1	6	345	38.4	5.9	157.46	13	2.731	2.826	2.233	0.0171938	0.0164994	0.021188	124.3	45.5	128.6	101.6	9.7	14.02	25.08	12.93	2.99164e+07	3.63521e+07	3.3444e+07	1.33575e+07	1.00796e+07	1.22473e+07	3.46157e+07	2.21097e+07	3.63957e+07	3.23004e+07	2.51674e+07	2.73441e+07	High	High	High	High	High	Peak Found	High
FALSE	High	Master Protein	Glyma.02G139900.3.p	K12741 - heterogeneous nuclear ribonucleoprotein A1/A3 (HNRNPA1_3) (1 of 20)	0	49.735	17	6	25	0	6	384	41.3	7.02	76.55	6	3.392	2.817	2.054	0.0126735	0.0130972	0.116513	146.5	43.2	121.6	88.7	17.86	17.42	3.82	22.2	1.57215e+07	2.02623e+07	2.25725e+07	7.70373e+06	5.9741e+06	5.60697e+06	1.68284e+07	1.78961e+07	1.67071e+07	8.47152e+06	1.22701e+07	1.32233e+07	High	High	High	High	High	Peak Found	High
FALSE	High	Master Protein	Glyma.13G060100.1.p	PF12204 - Domain of unknown function (DUF3598) (DUF3598) (1 of 2)	0	44.912	33	9	27	1	9	392	43.7	5.3	53.61	9	2.117	2.812	1.593	0.0821166	0.00796263	0.360802	112.6	53.2	149.5	84.7	24.6	7.6	10.58	18.01	1.44148e+07	2.05445e+07	2.39462e+07	1.01027e+07	8.70055e+06	9.7045e+06	2.69607e+07	2.72894e+07	3.24096e+07	1.12434e+07	1.5846e+07	1.54635e+07	High	High	High	High	High	Not Found	High
FALSE	High	Master Protein	Glyma.13G106200.1.p	K03257 - translation initiation factor 4A (EIF4A) (1 of 11)	0	173.561	42	20	165	1	5	413	46.7	5.68	439.85	20	1.916	2.8	2.942	0.126709	0.0152698	0.0219114	88.5	46.2	129.3	135.9	8.72	23.5	8.98	24.65	1.51862e+07	1.30472e+07	1.31633e+07	8.78722e+06	5.48884e+06	6.8689e+06	1.92318e+07	2.15618e+07	1.81028e+07	1.28991e+07	2.02111e+07	2.09191e+07	High	High	High	High	High	Not Found	High
FALSE	High	Master Protein	Glyma.16G194100.1.p	PTHR10281:SF45 - MEMBRANE STEROID-BINDING PROTEIN 1-RELATED (1 of 5)	0	49.872	47	5	35	3	3	222	24.2	4.64	100.15	5	2.104	2.784	0.695	0.389028	0.04371	0.390345	127.8	60.8	169.2	42.2	19.03	18.85	8.72	30.1	1.17038e+07	8.15233e+06	1.14742e+07	7.20857e+06	5.45471e+06	5.13108e+06	1.5184e+07	1.5235e+07	1.30239e+07	3.78981e+06	4.98085e+06	2.6831e+06	High	High	High	High	High	High	High
FALSE	High	Master Protein	Glyma.14G014800.5.p	K02739 - 20S proteasome subunit beta 2 (PSMB7) (1 of 2)	0	12.024	11	4	12	3	4	271	29.3	7.25	26.48	4	4.651	2.763	3.962	0.00820695	0.0266626	0.00462138	150.3	32.3	89.3	128.1	1.72	12.77	15.36	42.42	4.15382e+07	4.08093e+07	4.22357e+07	7.2063e+06	9.18846e+06	8.93137e+06	2.17405e+07	2.46745e+07	2.9434e+07	3.53825e+07	6.17354e+07	2.80787e+07	High	Peak Found	High	High	Peak Found	Peak Found	High
FALSE	High	Master Protein	Glyma.01G232600.1.p	PTHR13856//PTHR13856:SF93 - VHS DOMAIN CONTAINING PROTEIN FAMILY // SUBFAMILY NOT NAMED (1 of 4)	0	34.63	24	7	28	4	7	405	45.1	4.81	68.71	7	2.418	2.738	1.509	0.0821166	0.0290189	0.312759	126.2	52.2	142.9	78.7	15.61	26.88	27.24	29.97	4.98859e+07	4.762e+07	6.30901e+07	2.06323e+07	2.44191e+07	1.39713e+07	5.64984e+07	5.19741e+07	8.4304e+07	3.11277e+07	4.78804e+07	2.80007e+07	High	High	High	High	High	High	High
FALSE	High	Master Protein	Glyma.04G009800.1.p	K18649 - inositol-phosphate phosphatase / L-galactose 1-phosphate phosphatase / histidinol-phosphatase (IMPL2) (1 of 1)	0	11.74	8	2	8	0	2	303	33.5	6.11	24.68	2	3.266	2.699	3.084	0.0118716	0.0247994	0.00812861	130	39.8	107.4	122.8	20.75	1.88	27.34	12.16	1.08265e+07	1.23628e+07	1.61099e+07	3.70958e+06	3.78574e+06	3.85178e+06	6.88022e+06	1.21476e+07	1.02173e+07	1.33798e+07	1.05125e+07	1.16768e+07	Peak Found	High	High	High	High	Not Found	High
FALSE	High	Master Protein	Glyma.02G022800.1.p	PTHR37736:SF1 - GENOMIC DNA, CHROMOSOME 3, P1 CLONE:MSD24 (1 of 4)	0	87.931	30	10	69	6	6	445	48.6	5.29	234.22	10	1.314	2.651	2.822	1	0.0379682	0.0522725	67.5	51.4	136.2	145	24.09	27.95	14.02	15.14	1.16735e+07	1.44435e+07	1.88306e+07	10994043	1.08413e+07	1.72189e+07	2.91483e+07	2.90885e+07	3.68145e+07	3.21289e+07	3.10259e+07	2.40174e+07	High	High	High	High	High	High	High
FALSE	High	Master Protein	Glyma.04G077400.1.p	K02738 - 20S proteasome subunit beta 1 (PSMB6) (1 of 2)	0	52.467	38	9	46	1	9	233	25.1	5.36	142.41	9	2.791	2.579	1.346	0.00689509	0.00694389	0.230043	144.7	51.8	133.7	69.8	9.73	3.24	12.26	25.47	6.33062e+07	5.96758e+07	7.19792e+07	2.17496e+07	2.26838e+07	2.31867e+07	5.2273e+07	5.84908e+07	6.67359e+07	3.05344e+07	4.33349e+07	2.70663e+07	High	High	High	High	High	Peak Found	High
FALSE	High	Master Protein	Glyma.03G137000.1.p	K03403 - magnesium chelatase subunit H (chlH, bchH) (1 of 3)	0	118.759	17	20	69	4	4	1384	153.6	6.14	156.08	20	0.969	2.568	1.668	1	0.0134486	0.117742	62.5	64.5	165.5	107.5	16.65	5.11	29.9	10.28	3.41372e+06	2.84808e+06	3.98522e+06	3.35762e+06	3.52389e+06	3.71803e+06	9.04903e+06	7.41553e+06	1.31437e+07	6.9772e+06	5.87868e+06	5.85459e+06	High	Peak Found	High	High	High	Not Found	Peak Found
FALSE	High	Master Protein	Glyma.08G335500.1.p	PTHR33791:SF4 - CHAPERONIN-LIKE RBCX PROTEIN (1 of 3)	0	32.068	28	5	13	1	2	225	25.6	8.85	25.94	5	2.378	2.561	2.141	0.00631693	0.00544654	0.0063444	117.7	49.5	126.8	106	9.5	11.03	18.41	6.31	9.10161e+06	1.03554e+07	8.63609e+06	3.15081e+06	3.82781e+06	3.85306e+06	9.91666e+06	7.01974e+06	9.80403e+06	7.5402e+06	8.54641e+06	8.19481e+06	High	High	High	Peak Found	Not Found	Peak Found	High
FALSE	High	Master Protein	Glyma.11G244700.1.p	K09497 - T-complex protein 1 subunit epsilon (CCT5) (1 of 2)	0	29.583	13	5	30	0	5	535	59.2	5.85	68.73	5	3.647	2.415	4.16	0.00205628	0.00608646	0.000620697	130	35.6	86.1	148.3	17.21	9.24	17.65	2.65	5.02947e+07	5.52153e+07	3.90364e+07	1.37916e+07	1.55654e+07	1.30184e+07	3.02539e+07	4.22305e+07	3.33048e+07	5.88318e+07	5.73777e+07	5.57887e+07	High	High	High	High	High	Peak Found	High
FALSE	High	Master Protein	Glyma.18G222200.1.p	PTHR32382:SF5 - FASCICLIN-LIKE ARABINOGALACTAN PROTEIN 10-RELATED (1 of 2)	0	73.655	31	9	108	3	3	416	42.5	6.34	330	9	2.635	2.403	1.158	0.00631693	0.00433541	0.802676	146.5	55.6	133.6	64.3	6.07	13.56	18.36	9.99	1.73049e+07	1.53253e+07	1.6454e+07	5.63566e+06	7.35015e+06	6.24336e+06	1.43758e+07	1.98843e+07	1.50028e+07	7.22764e+06	7.16555e+06	8.5164e+06	Not Found	High	High	High	High	High	Not Found
FALSE	High	Master Protein	Glyma.10G041500.1.p	2.7.1.3 - Ketohexokinase / Hepatic fructokinase (1 of 1)	0	44.745	25	9	40	0	9	409	43.6	7.08	106.25	9	1.395	2.26	0.703	0.227505	0.00356576	0.136795	104.1	74.7	168.7	52.5	9.74	12.14	10.55	7.83	3.04275e+07	3.66047e+07	3.56874e+07	2.72936e+07	2.55892e+07	2.14447e+07	4.99697e+07	6.16614e+07	5.78328e+07	1.93047e+07	1.7997e+07	1.64977e+07	High	High	High	High	High	Peak Found	High
FALSE	High	Master Protein	Glyma.10G155000.1.p	K01875 - seryl-tRNA synthetase (SARS, serS) (1 of 3)	0	113.517	41	16	93	4	4	447	51.3	6.43	198.13	16	2.862	2.259	3.634	0.00316144	0.00658842	0.000577221	117.3	41	92.6	149	14.88	14.42	10.41	9.88	1.55298e+07	1.31216e+07	1.15694e+07	4.5849e+06	3.90356e+06	5.22104e+06	1.17261e+07	1.03571e+07	9.55465e+06	1.6324e+07	1.66633e+07	1.94717e+07	High	High	High	High	High	High	Not Found
FALSE	High	Master Protein	Glyma.08G128300.1.p	K14294 - partner of Y14 and mago (WIBG, PYM) (1 of 3)	0	9.991	15	2	4	0	2	196	22.2	9.29	8.48	2	3.107	2.256	2.224	0.0218448	0.0296079	0.0338679	144.7	46.6	105.1	103.6	6.25	18.4	24.95	29.79	1.09186e+07	1.08247e+07	9.73933e+06	3.63442e+06	2.54113e+06	3.48414e+06	7.257e+06	7.8588e+06	1.13313e+07	7.74709e+06	6.39021e+06	1.12786e+07	Not Found	Not Found	Peak Found	Peak Found	Peak Found	High	Not Found
FALSE	High	Master Protein	Glyma.11G138800.1.p	KOG2209 - Oxysterol-binding protein (1 of 5)	0	27.527	13	5	17	0	5	450	51.2	5.14	30.5	5	2.524	2.205	1.613	0.02675	0.0444074	0.0643545	137.5	54.5	120.1	87.9	6.08	15.67	12.72	33.6	3.38059e+07	3.49149e+07	3.79801e+07	1.38323e+07	1.45057e+07	1.06866e+07	2.5088e+07	3.05071e+07	3.22233e+07	2.17702e+07	3.79483e+07	2.23103e+07	High	High	Peak Found	High	High	Peak Found	High
FALSE	High	Master Protein	Glyma.05G185200.1.p	K15111 - solute carrier family 25 (mitochondrial S-adenosylmethionine transporter), member 26 (SLC25A26) (1 of 3)	0	16.603	11	3	7	0	3	326	35.2	9.54	9.33	3	1.13	2.159	0.508	1	0.0204503	0.0152367	94.2	83.4	180	42.3	20.27	7.88	13.34	8.69	1.76779e+07	1.22892e+07	1.30855e+07	1.08584e+07	1.15773e+07	1.26896e+07	2.50011e+07	1.98407e+07	2.54809e+07	5.18255e+06	5.87878e+06	6.14843e+06	High	High	Peak Found	High	High	Peak Found	Peak Found
FALSE	High	Master Protein	Glyma.02G122900.1.p	PTHR31923:SF7 - BSD DOMAIN-CONTAINING PROTEIN (1 of 2)	0	9.149	9	3	5	1	3	304	33.1	4.97	9.45	3	1.182	2.149	0.304	1	0.0379682	0.00456198	102	86.3	185.4	26.3	19.64	5.1	23.95	19.98	6.15164e+06	5.75142e+06	8.2047e+06	5.43687e+06	4.90966e+06	5.20398e+06	1.11811e+07	9.52882e+06	1.50943e+07	1.69566e+06	1.13902e+06	1.58292e+06	Peak Found	Peak Found	High	Peak Found	Peak Found	Not Found	Peak Found
FALSE	High	Master Protein	Glyma.16G048100.1.p	K01191 - alpha-mannosidase (E3.2.1.24) (1 of 7)	0	34.595	10	9	31	0	6	1011	115	5.91	70.45	9	2.578	2.054	1.351	0.02675	0.0397201	0.71966	147.7	57.3	117.7	77.4	6.58	29.73	16.21	15.69	5.9893e+07	5.4519e+07	5.28742e+07	2.58168e+07	2.11504e+07	1.38572e+07	4.16055e+07	5.5593e+07	4.34426e+07	2.22355e+07	3.02816e+07	2.85785e+07	High	High	High	High	High	Peak Found	High
FALSE	High	Master Protein	Glyma.09G111700.1.p	PF04755 - PAP_fibrillin (PAP_fibrillin) (1 of 23)	0	71.785	45	11	90	1	4	310	33.6	7.08	233.35	11	2.166	2.027	2.153	0.0246194	0.0201023	0.00833554	117.9	54.5	110.4	117.2	9.39	5.7	13.81	22.7	3.41978e+07	3.73016e+07	4.12408e+07	1.71762e+07	1.72241e+07	1.89541e+07	3.4909e+07	4.25055e+07	3.28722e+07	3.52846e+07	3.7078e+07	5.24663e+07	High	High	High	High	High	Not Found	High
FALSE	High	Master Protein	Glyma.14G145000.1.p	PTHR11106 - GANGLIOSIDE INDUCED DIFFERENTIATION ASSOCIATED PROTEIN 2-RELATED (1 of 9)	0	32.22	18	3	12	3	3	236	25.3	8.16	34.53	3	1.198	1.94	1.262	0.732284	0.00746722	0.416356	88.7	74.1	143.7	93.5	12.5	11.93	5.54	7.77	1.05511e+07	9.67868e+06	1.23405e+07	7.81461e+06	8.80944e+06	9.92566e+06	1.57008e+07	1.7092e+07	1.74584e+07	1.15766e+07	1.11208e+07	9.93886e+06	Peak Found	High	High	High	High	Not Found	Peak Found
FALSE	High	Master Protein	Glyma.03G088500.1.p	K03012 - DNA-directed RNA polymerase II subunit RPB4 (RPB4, POLR2D) (1 of 5)	0	7.112	12	2	3	0	2	138	15.9	4.83	6.19	2	3.256	1.921	1.806	0.00096361	0.011953	0.0186906	163.1	50.1	96.2	90.5	10.97	16.77	1.7	6.7	1.42656e+07	1.1456e+07	1.27495e+07	3.55534e+06	4.89077e+06	3.9159e+06	7.37175e+06	7.52076e+06	7.62528e+06	6.461e+06	7.07273e+06	7.37839e+06	Peak Found	High	High	Peak Found	Peak Found	Peak Found	Not Found
FALSE	High	Master Protein	Glyma.09G158100.1.p	K03264 - translation initiation factor 6 (EIF6) (1 of 5)	0	8.38	9	2	7	0	2	245	26.5	4.74	18.38	2	0.694	1.82	1.488	0.0441796	0.0115936	0.0450848	55.5	80	145.6	119	15.42	3.62	9.62	2.43	4.18049e+06	4.11288e+06	3.13125e+06	6.2006e+06	5.77396e+06	5.92994e+06	1.14889e+07	9.48212e+06	1.07927e+07	8.82229e+06	8.75097e+06	9.15623e+06	High	High	Not Found	High	Peak Found	Not Found	High
FALSE	High	Master Protein	Glyma.05G219400.1.p	K09490 - heat shock 70kDa protein 5 (HSPA5, BIP) (1 of 4)	0	286.431	47	31	289	2	2	668	73.6	5.19	837.13	31	0.891	1.594	1.409	1	0.0277281	0.118415	72.8	81.7	130.3	115.1	8.11	10.11	6.79	13.29	5.63219e+06	6.57664e+06	6.40656e+06	6.04682e+06	7.29274e+06	7.19193e+06	1.02728e+07	11466153	1.16747e+07	1.03409e+07	1.01315e+07	8.05417e+06	High	High	Not Found	High	High	High	High
FALSE	High	Master Protein	Glyma.12G229700.1.p	4.1.1.37 - Uroporphyrinogen decarboxylase / Uroporphyrinogen-III carboxy-lyase (1 of 4)	0	28.273	18	6	24	0	6	411	45.2	8.31	32.31	6	1.228	0.778	0.943	0.376018	0.03004	1	124.4	101.3	78.8	95.5	8.71	4.88	8.05	1.96	4.13557e+07	3.4721e+07	3.8488e+07	3.07091e+07	3.36678e+07	3.13523e+07	2.43882e+07	2.13575e+07	2.484e+07	2.95326e+07	3.05639e+07	2.95684e+07	High	High	High	High	High	Not Found	High
FALSE	High	Master Protein	Glyma.13G152500.1.p	K00963 - UTP--glucose-1-phosphate uridylyltransferase (UGP2, galU, galF) (1 of 3)	0	171.625	59	21	133	9	10	475	51.9	5.49	332.46	21	1.142	0.663	0.403	1	0.0352985	0.000527639	142.4	124.7	82.7	50.2	11.65	7.5	9.09	2.64	2.67959e+07	2.54611e+07	2.13151e+07	2.4548e+07	2.22912e+07	2.12154e+07	1.46574e+07	1.71604e+07	1.47781e+07	8.6159e+06	9.05456e+06	8.97803e+06	High	High	High	High	High	Peak Found	High
FALSE	High	Master Protein	Glyma.03G168700.1.p	1.1.1.1//1.1.1.284//1.2.1.1 - Alcohol dehydrogenase / Aldehyde reductase // S-(hydroxymethyl)glutathione dehydrogenase / NAD-linked formaldehyde dehydrogenase (1 of 3)	0	110.567	45	11	74	0	11	379	40.3	6.76	260.46	11	0.956	0.615	0.455	1	0.0363895	0.00201274	126.4	132.2	81.3	60.2	3.99	5.48	10.98	15.35	1.34234e+08	1.25925e+08	1.24905e+08	1.31744e+08	1.22642e+08	1.36736e+08	9.24951e+07	8.10024e+07	7.45796e+07	4.66862e+07	6.30038e+07	5.99781e+07	High	High	High	High	High	High	High
FALSE	High	Master Protein	Glyma.01G008500.1.p	PTHR23406:SF26 - NADP-DEPENDENT MALIC ENZYME 1 (1 of 5)	0	67.523	28	14	74	1	3	591	65	6.15	148.28	14	0.83	0.604	0.01	0.209195	0.0162983	NA	136.4	164.4	99.2	NA	13.41	6.13	3.19	NA	3.57809e+06	3.51457e+06	2.78378e+06	4.2356e+06	4.66501e+06	4.17541e+06	2.42722e+06	2.57463e+06	2.55678e+06	NA	NA	NA	High	High	Not Found	High	High	Not Found	High
FALSE	High	Master Protein	Glyma.10G295700.1.p	PTHR27001:SF115 - PTI1-LIKE TYROSINE-PROTEIN KINASE 1-RELATED (1 of 2)	0	48.624	24	7	26	0	7	404	44.8	8.73	73.51	7	1.094	0.56	0.075	1	0.0300325	3.07e-05	160.3	146.6	82.1	11	17.94	7.5	17.82	6.69	1.89856e+07	2.02704e+07	1.42025e+07	1.73605e+07	1.96131e+07	1.71862e+07	9.71826e+06	7.60753e+06	1.0923e+07	1.30627e+06	1.33826e+06	1.17737e+06	High	High	Peak Found	High	High	Not Found	High
FALSE	High	Master Protein	Glyma.08G087200.1.p	K02901 - large subunit ribosomal protein L27e (RP-L27e, RPL27) (1 of 4)	0	32.701	28	4	34	2	2	135	15.7	10.42	86.85	4	0.01	0.546	3.084	NA	0.0372014	0.00177282	NA	86.4	47.2	266.4	NA	6.7	13.75	12.35	NA	NA	NA	4.0285e+06	3.90294e+06	3.53569e+06	2.63033e+06	2.05391e+06	2.13285e+06	1.12643e+07	14240893	1.20356e+07	Not Found	High	Not Found	High	High	High	High
FALSE	High	Master Protein	Glyma.02G185300.1.p	PTHR22912:SF48 - NADPH-DEPENDENT THIOREDOXIN REDUCTASE 3 (1 of 2)	0	213.035	45	17	119	0	7	522	57	7.06	440.27	17	1.011	0.539	0.177	1	0.00452048	2.99e-05	148.3	146.7	79.1	25.9	11.83	4.64	5.85	9.37	5.18854e+07	4.66349e+07	4.08901e+07	4.61329e+07	4.90134e+07	4.47803e+07	2.48809e+07	2.33792e+07	2.62861e+07	7.19628e+06	8.15646e+06	8.67594e+06	High	High	Not Found	High	High	Peak Found	High
FALSE	High	Master Protein	Glyma.15G047200.1.p	PF11891 - Domain of unknown function (DUF3411) (DUF3411) (1 of 19)	0	30.054	12	7	18	2	7	523	57.6	8.5	33.76	7	0.658	0.532	1.066	0.35987	0.0332231	1	80.8	122.8	65.4	131	12.32	17.76	18.26	17.96	8.00806e+06	6.36432e+06	6.71525e+06	1.36124e+07	1.00762e+07	1.02023e+07	4.14383e+06	5.99186e+06	5.43189e+06	1.10107e+07	1.08799e+07	7.86229e+06	High	High	High	High	High	Peak Found	High
FALSE	High	Master Protein	Glyma.13G338700.1.p	PTHR12815:SF18 - PROTEIN TOC75-3, CHLOROPLASTIC-RELATED (1 of 2)	0	187.952	38	21	109	3	3	800	87.5	7.58	298.69	21	1.17	0.522	0.437	1	0.0115936	0.0063444	149.6	127.9	66.7	55.9	4.64	13.14	21.55	9.29	6.43699e+06	6.35846e+06	5.90104e+06	5.41623e+06	6.76164e+06	5.43576e+06	1.93944e+06	2.83575e+06	2.956e+06	2.57475e+06	2.13628e+06	2.37564e+06	High	High	Peak Found	High	High	Peak Found	Peak Found
FALSE	High	Master Protein	Glyma.14G195000.1.p	K01953 - asparagine synthase (glutamine-hydrolysing) (asnB, ASNS) (1 of 7)	0	160.833	34	17	129	5	5	581	65.5	6.47	305.11	17	0.834	0.515	0.579	1	0.00584513	0.0146151	113.9	136.7	70.3	79.1	14.17	7.37	7.24	10.01	2.69585e+07	2.61532e+07	3.36189e+07	3.60123e+07	3.23387e+07	3.13681e+07	1.66389e+07	1.57518e+07	1.81631e+07	1.87204e+07	1.81734e+07	2.18051e+07	High	High	Peak Found	High	High	Peak Found	High
FALSE	High	Master Protein	Glyma.09G035600.2.p	PTHR23118:SF6 - ATP-CITRATE SYNTHASE BETA CHAIN PROTEIN 1 (1 of 3)	0	67.683	24	10	34	0	10	608	66	7.87	103.29	10	0.808	0.513	0.278	1	0.0278976	0.00239741	124.3	153.9	78.9	42.8	9.69	2.99	24.89	17.06	2.77344e+07	2.33378e+07	2.77613e+07	3.43307e+07	3.57959e+07	3.37974e+07	1.76056e+07	1.81402e+07	1.11509e+07	7.17407e+06	9.54524e+06	1.00054e+07	High	High	High	High	High	Not Found	High
FALSE	High	Master Protein	Glyma.12G210600.1.p	K01595 - phosphoenolpyruvate carboxylase (ppc) (1 of 10)	0	386.326	48	42	239	3	29	966	110.5	6.42	664.46	42	1.429	0.506	0.918	1	0.0467343	1	148.4	103.8	52.5	95.3	18.91	16.57	8.86	17.76	2.71334e+08	1.91254e+08	271486138	2.36533e+08	1.89896e+08	1.72569e+08	9.60234e+07	9.47012e+07	1.10745e+08	1.7424e+08	2.17144e+08	1.53927e+08	High	High	High	High	High	Peak Found	High
FALSE	High	Master Protein	Glyma.08G017800.1.p	PTHR22912:SF97 - MONODEHYDROASCORBATE REDUCTASE, CHLOROPLASTIC (1 of 2)	0	98.735	40	14	66	0	14	488	53.3	8.54	198.9	14	0.696	0.503	0.257	0.259221	0.0163847	0.000715529	113.3	162.9	81.9	41.9	7.71	7.51	10.97	21.62	8.26512e+07	8.01571e+07	7.12157e+07	1.08238e+08	1.15215e+08	1.25601e+08	5.00047e+07	6.22755e+07	5.79531e+07	2.963e+07	3.73494e+07	2.42703e+07	High	High	High	High	High	Not Found	High
FALSE	High	Master Protein	Glyma.08G086800.1.p	K15422 - 3'(2'), 5'-bisphosphate nucleotidase / inositol polyphosphate 1-phosphatase (SAL) (1 of 2)	0	26.18	16	4	13	3	4	404	43.1	6.87	47.49	4	0.804	0.486	0.926	1	0.0233096	1	99.9	124.4	60.4	115.2	16.56	8.08	17.97	20.46	8.89153e+06	1.10857e+07	8.09259e+06	1.23407e+07	1.10647e+07	1.05674e+07	3.90609e+06	5.37668e+06	5.49586e+06	7.70495e+06	10251452	1.16999e+07	High	High	High	High	High	Peak Found	Peak Found
FALSE	High	Master Protein	Glyma.11G053700.1.p	PTHR11911//PTHR11911:SF109 - INOSINE-5-MONOPHOSPHATE DEHYDROGENASE RELATED // SUBFAMILY NOT NAMED (1 of 4)	0	128.476	54	11	170	1	1	228	25.1	8.38	480.57	11	0.264	0.476	0.738	0.00598592	0.0318628	0.377464	42.7	161.4	76.9	119.1	14.58	21.7	18.67	11.14	2.83562e+06	2.55221e+06	3.39106e+06	1.07266e+07	8.85139e+06	1.36168e+07	4.02467e+06	5885588	5.11077e+06	6.52962e+06	7.91382e+06	8.02829e+06	High	High	Peak Found	High	High	High	High
FALSE	High	Master Protein	Glyma.07G007000.1.p	K15718 - linoleate 9S-lipoxygenase (LOX1_5) (1 of 21)	0	197.134	38	26	102	4	17	864	96.8	6.15	294.41	26	0.875	0.469	0.398	1	0.0080908	0.00585467	127.7	145.9	68.4	58	16.04	11.7	15.4	12.23	4.01062e+07	3.13354e+07	3.01632e+07	4.22617e+07	3.39309e+07	3.58092e+07	1.2732e+07	1.6785e+07	1.69374e+07	1.42413e+07	1.72397e+07	1.38671e+07	High	High	Peak Found	High	High	Peak Found	High
FALSE	High	Master Protein	Glyma.06G039700.1.p	K08911 - light-harvesting complex I chlorophyll a/b binding protein 5 (LHCA5) (1 of 1)	0	31.11	19	4	19	0	4	285	30.7	8.02	53.12	4	0.804	0.464	0.46	0.985377	0.0210272	0.0234413	117.9	146.6	68	67.4	5	13.01	18.52	24.31	2.95684e+07	2.86398e+07	2.67879e+07	3.56175e+07	3.499e+07	4.38831e+07	1.65256e+07	1.33005e+07	1.93709e+07	1.3501e+07	2.17452e+07	1.6382e+07	High	High	Peak Found	High	High	Peak Found	High
FALSE	High	Master Protein	Glyma.11G093200.1.p	1.8.7.1 - Assimilatory sulfite reductase (ferredoxin) / Sulfite reductase (ferredoxin) (1 of 2)	0	106.436	29	16	57	5	5	687	77.2	9.16	133.73	16	0.832	0.46	0.072	0.589265	0.00240858	2.38e-05	140.7	169.2	77.8	12.2	8.43	1.16	13.08	8.04	1.8274e+07	1.64384e+07	1.94586e+07	2.19693e+07	2.17365e+07	2.2245e+07	1.15761e+07	8.91374e+06	1.01076e+07	1.58881e+06	1.39955e+06	1.63233e+06	High	High	Peak Found	High	High	Not Found	High
FALSE	High	Master Protein	Glyma.17G015600.1.p	PTHR22572:SF119 - GLUCOSE-1-PHOSPHATE ADENYLYLTRANSFERASE LARGE SUBUNIT 1, CHLOROPLASTIC (1 of 2)	0	315.671	60	27	218	2	2	523	58.1	8.34	669.56	27	1.188	0.456	0.339	1	0.0368177	0.0105304	159.3	134.1	61.2	45.4	5.91	9.88	29.83	16.73	1.84568e+07	1.74191e+07	1.9603e+07	1.55361e+07	1.46483e+07	1.77149e+07	9.79847e+06	5.40665e+06	7.08476e+06	5.09469e+06	5.26143e+06	6.83164e+06	High	High	High	High	High	Not Found	High
FALSE	High	Master Protein	Glyma.05G117900.1.p	PTHR36080:SF1 - DBJ (1 of 2)	0	6.51	11	2	3	0	2	166	18.3	5.19	5.75	2	0.01	0.444	0.78	NA	0.0446009	0.4695	NA	179.9	79.9	140.2	NA	1.83	23.63	20.71	NA	NA	NA	9.69498e+06	1.00024e+07	9.68767e+06	3.21598e+06	4.30427e+06	5.22065e+06	7.55792e+06	5.38177e+06	8.14463e+06	Not Found	Not Found	Not Found	Not Found	Not Found	Peak Found	Peak Found
FALSE	High	Master Protein	Glyma.06G133700.1.p	K05275 - pyridoxine 4-dehydrogenase (E1.1.1.65) (1 of 1)	0	21.745	12	4	8	1	4	361	40.2	9.09	20.25	4	0.629	0.443	0.01	0.293893	0.0248256	NA	121.4	193	85.6	NA	13.15	17.36	14.88	NA	1.73859e+06	1.33373e+06	1.57498e+06	2.50285e+06	1.98222e+06	2.81935e+06	867187	1157171	1.10944e+06	NA	NA	NA	High	Peak Found	Not Found	High	High	Peak Found	Peak Found
FALSE	High	Master Protein	Glyma.11G110000.1.p	K07071 - uncharacterized protein (K07071) (1 of 2)	0	63.5	27	7	49	4	4	350	38.1	8.94	146.39	7	1.088	0.442	0.433	1	0.000419768	0.000270198	146.9	135	59.7	58.4	6.62	6.06	9.5	5.16	4.22129e+07	4.26199e+07	4.74644e+07	3.91005e+07	4.33871e+07	3.91577e+07	1.51794e+07	1.73137e+07	1.83348e+07	1.70224e+07	1.5509e+07	1.69375e+07	High	High	High	High	High	High	High
FALSE	High	Master Protein	Glyma.20G143400.1.p	3.1.1.1//4.2.1.105 - Carboxylesterase / Procaine esterase (1 of 10)	0	14.593	13	3	7	3	3	323	35.7	5.68	20.22	3	0.664	0.433	0.722	0.0880258	0.0114912	0.223891	94.2	141.9	61.4	102.5	22.38	5.67	4.31	11.26	5.90538e+06	8.94455e+06	9.03734e+06	1.44781e+07	1.34741e+07	1.2957e+07	5.83482e+06	6.28146e+06	5.83442e+06	1.04062e+07	8.314e+06	9.73451e+06	High	High	Peak Found	Peak Found	Peak Found	Peak Found	High
FALSE	High	Master Protein	Glyma.03G260500.1.p	PTHR24012:SF479 - RNA RECOGNITION MOTIF-CONTAINING PROTEIN (1 of 2)	0	34.11	18	7	25	0	7	483	53.3	4.96	56.59	7	0.927	0.431	1.161	1	0.0215062	1	105.4	113.6	49	132	3.78	17.37	12.93	21.77	2.10461e+07	2.14849e+07	2.2635e+07	1.8389e+07	2.31684e+07	2.61658e+07	9.98699e+06	1.11309e+07	8.57604e+06	2.69066e+07	1.87142e+07	2.89323e+07	High	High	High	High	High	High	High
FALSE	High	Master Protein	Glyma.14G094700.1.p	K00281 - glycine dehydrogenase (GLDC, gcvP) (1 of 4)	0	663.11	40	35	451	10	10	1059	114.9	7.5	1583.28	35	0.628	0.43	0.161	0.553741	0.0272743	0.0011686	113.2	180.3	77.5	29	20.07	19.22	18.37	9.88	2.58101e+08	2.22038e+08	1.71331e+08	3.78852e+08	3.53722e+08	2.58503e+08	1.52515e+08	1.52167e+08	1.08519e+08	5.66891e+07	6.71363e+07	5.69698e+07	High	High	High	High	High	Peak Found	High
FALSE	High	Master Protein	Glyma.11G096200.1.p	K16871 - 4-aminobutyrate---pyruvate transaminase (POP2) (1 of 2)	0	24.33	14	6	18	0	6	530	58.2	7.09	43.64	6	1.165	0.427	0.331	1	0.0188505	0.0066043	159.4	136.8	58.4	45.3	20.89	9.06	22.74	8.18	2.19691e+07	1.52325e+07	2.29066e+07	1.77023e+07	1.88549e+07	2.11254e+07	8.04457e+06	5.93089e+06	9.4615e+06	6.24734e+06	5.97704e+06	6.98906e+06	High	High	High	High	High	Peak Found	High
FALSE	High	Master Protein	Glyma.07G263100.1.p	6.1.1.4 - Leucine--tRNA ligase / Leucyl-tRNA synthetase (1 of 4)	0	60.531	12	9	36	0	9	972	110.2	6.67	91.56	9	0.997	0.424	0.347	1	0.0306168	0.0173602	144	144.5	61.2	50.2	14.66	6.29	32.71	13.01	2.26052e+07	1.8503e+07	2.48592e+07	2.48504e+07	2.2684e+07	2.20724e+07	9.61343e+06	1.24591e+07	6.28279e+06	9.37115e+06	7.88059e+06	7.30877e+06	High	High	Peak Found	High	High	Peak Found	High
FALSE	High	Master Protein	Glyma.02G186700.1.p	K01070 - S-formylglutathione hydrolase (frmB, ESD, fghA) (1 of 2)	0	40.981	23	7	30	3	3	285	32.1	7.05	59.59	7	0.891	0.404	0.01	1	0.0115936	NA	155.3	174.3	70.4	NA	6.82	10	18.6	NA	7.86969e+06	8184354	8.97448e+06	1.02222e+07	9.1815e+06	8.37591e+06	3.70784e+06	4.90453e+06	3.5167e+06	NA	NA	NA	High	High	Not Found	High	High	Not Found	High
FALSE	High	Master Protein	Glyma.12G028300.2.p	1.3.1.72 - Delta(24)-sterol reductase / Lanosterol Delta(24)-reductase (1 of 2)	0	36.128	16	7	17	1	7	567	66	8.22	36.78	7	0.8	0.394	0.244	1	0.0173777	0.00252838	131.2	164.1	64.7	40	23.66	12.22	15.21	22.64	2.42217e+07	1.51599e+07	1.86046e+07	2.78598e+07	2.32682e+07	2.22474e+07	9.17151e+06	9.54876e+06	7.11443e+06	3.96861e+06	5.66662e+06	6.2906e+06	High	High	Peak Found	High	High	Peak Found	High
FALSE	High	Master Protein	Glyma.11G091800.1.p	K03939 - NADH dehydrogenase (ubiquinone) Fe-S protein 6 (NDUFS6) (1 of 2)	0	50.219	17	4	22	0	4	105	11.7	7.43	65.53	4	0.393	0.381	0.638	0.0515714	0.0407139	0.682665	65.2	165.9	63.1	105.8	8.03	24.79	21.55	21.55	2.39137e+07	2.59641e+07	2.21115e+07	4.46679e+07	6.0815e+07	7.43568e+07	3.13634e+07	2.31479e+07	2.11032e+07	3.87943e+07	3.66886e+07	5.37131e+07	High	High	High	High	Peak Found	High	Peak Found
FALSE	High	Master Protein	Glyma.14G064600.2.p	PTHR10795//PTHR10795:SF348 - PROPROTEIN CONVERTASE SUBTILISIN/KEXIN // SUBFAMILY NOT NAMED (1 of 14)	0	169.915	34	17	109	16	16	737	79.3	8.76	350.55	17	0.534	0.364	0.472	0.371099	0.0474926	0.1266	90.1	168.8	61.5	79.6	14.99	12.03	31.23	20.42	8.54801e+07	9.65928e+07	1.1486e+08	1.80897e+08	1.86078e+08	1.48003e+08	1.02036e+08	6.59353e+07	5.78827e+07	8.53219e+07	7.67881e+07	1.12588e+08	High	High	High	High	High	High	High
FALSE	High	Master Protein	Glyma.04G174400.2.p	PF06549 - Protein of unknown function (DUF1118) (DUF1118) (1 of 4)	0	18.165	13	2	18	1	1	194	20.4	9.11	61.59	2	0.79	0.363	0.425	1	0.00687595	0.0223281	122.5	155.2	56.4	66	13.29	10.04	26.14	3.61	2.54035e+07	2.09528e+07	2.73101e+07	3.37845e+07	2.77281e+07	3.21736e+07	7.38108e+06	12498540	1.16899e+07	1.31695e+07	1.41564e+07	1.36807e+07	High	High	Not Found	High	High	Not Found	High
FALSE	High	Master Protein	Glyma.08G052600.1.p	PTHR11467//PTHR11467:SF33 - HISTONE H1/H5 // SUBFAMILY NOT NAMED (1 of 7)	0	39.29	17	5	33	4	4	413	44.2	10.92	93.64	5	0.268	0.362	0.834	0.00466928	0.00569763	0.945366	43.5	162.4	58.7	135.4	22.03	10.34	20.33	2.86	6.40545e+06	7.23862e+06	9.70227e+06	2.70475e+07	2.53511e+07	3.09561e+07	7.1058e+06	1.07045e+07	9.7857e+06	2.25586e+07	22333453	2.35581e+07	High	High	Not Found	High	High	High	High
FALSE	High	Master Protein	Glyma.17G030200.1.p	PF00407 - Pathogenesis-related protein Bet v I family (Bet_v_1) (1 of 39)	0	45.095	56	7	32	0	6	158	16.7	5.05	72.69	7	0.317	0.357	0.765	0.0441796	0.0427103	1	52	164	58.5	125.5	6.37	19.03	22.28	38.91	1.54112e+07	1.38799e+07	13777381	3.65132e+07	4.37409e+07	5.3413e+07	1.99283e+07	1.28042e+07	1.55961e+07	3.34767e+07	2.73046e+07	5.60972e+07	Not Found	High	Peak Found	High	High	High	High
FALSE	High	Master Protein	Glyma.09G226400.1.p	K14005 - protein transport protein SEC31 (SEC31) (1 of 2)	0	81.692	16	13	49	0	2	1148	124.9	5.31	120.23	13	0.633	0.351	1.432	0.932879	0.0352985	0.744252	74.2	117.1	41.1	167.6	10.19	33.73	30.87	25.07	9.9303e+06	1.18949e+07	1.01142e+07	1.29047e+07	1.5973e+07	2.4486e+07	3.62618e+06	6.93037e+06	5.60618e+06	3.39011e+07	2.21314e+07	2.28669e+07	High	High	High	High	Peak Found	High	Peak Found
FALSE	High	Master Protein	Glyma.11G240000.1.p	1.14.11.33 - DNA oxidative demethylase / Alkylated DNA repair protein (1 of 13)	0	49.259	36	7	26	0	6	301	32	9.16	67.31	7	0.61	0.35	1.066	0.141526	0.00452048	1	80.6	132.2	46.3	140.9	11.5	8.57	21.75	2.91	2.80733e+07	3.14883e+07	2.50075e+07	4.00403e+07	4.70973e+07	4.60307e+07	1.41945e+07	2.14387e+07	1.61171e+07	4.9057e+07	4.93294e+07	4.67622e+07	Peak Found	Peak Found	High	High	High	High	Peak Found
FALSE	High	Master Protein	Glyma.12G005400.1.p	K12178 - COP9 signalosome complex subunit 4 (COPS4, CSN4) (1 of 2)	0	12.456	9	4	12	1	4	397	45.1	5.26	23.17	4	1.078	0.345	0.877	1	0.0303951	1	130.6	121.2	41.9	106.3	12.91	19.47	26.17	12.66	1.0554e+07	1.10141e+07	1.33555e+07	1.03274e+07	1.02182e+07	7.15993e+06	3.15506e+06	3.52829e+06	5.09091e+06	8.02655e+06	1.03173e+07	8.96124e+06	High	High	High	High	High	Peak Found	High
FALSE	High	Master Protein	Glyma.18G058200.1.p	K13098 - RNA-binding protein FUS (TLS, FUS) (1 of 4)	0	42.153	15	7	44	2	3	508	49.6	8.68	114.43	7	0.089	0.338	1.132	0.000800998	0.0143615	1	13.8	156.3	52.8	177	12.79	27.29	20.67	14.95	4.25705e+06	4.89548e+06	5.50639e+06	5.52972e+07	3.979e+07	6.97749e+07	2.02935e+07	1.867e+07	1.3395e+07	6.26223e+07	7.57727e+07	5.67804e+07	High	High	High	High	High	High	High
FALSE	High	Master Protein	Glyma.19G183400.1.p	K13525 - transitional endoplasmic reticulum ATPase (VCP, CDC48) (1 of 11)	0	300.806	42	30	263	0	2	808	89.7	5.24	747.64	30	1.023	0.327	1.121	1	0.00319345	0.767546	117.9	115.2	37.7	129.2	8.31	10.08	6.44	22.4	7.67886e+06	8.36913e+06	9.07052e+06	8.72843e+06	8.17767e+06	7.13756e+06	2.90403e+06	2561379	2.67245e+06	8.11225e+06	9.16745e+06	1.23634e+07	High	High	High	High	High	Peak Found	Not Found
FALSE	High	Master Protein	Glyma.06G100600.1.p	K01214 - isoamylase (E3.2.1.68) (1 of 3)	0	24.786	7	4	15	0	4	772	87	6.13	45.32	4	7.11	0.326	0.697	0.000800998	0.00569763	0.458961	311.4	43.8	14.3	30.5	20.14	15.7	13.18	18.44	6.05297e+07	7.26024e+07	9.03504e+07	8.77102e+06	1.20075e+07	1.02111e+07	2.67151e+06	3324225	3.44069e+06	6.08243e+06	8.7602e+06	7.12088e+06	High	High	High	High	High	Not Found	High
FALSE	High	Master Protein	Glyma.01G225200.1.p	2.7.8.11//6.2.1.3 - CDP-diacylglycerol--inositol 3-phosphatidyltransferase / Phosphatidylinositol synthase // Long-chain-fatty-acid--CoA ligase / Lignoceroyl-CoA synthase (1 of 3)	0	8.411	4	3	6	2	2	671	75.3	7.23	5.14	3	0.896	0.317	2.302	1	0.00293069	0.00916797	79.4	88.6	28.1	203.9	1.76	7.57	25.2	10.26	8.10443e+06	8.13551e+06	8.36876e+06	8.14536e+06	9.45426e+06	9.07559e+06	2.91852e+06	2.88142e+06	1.79535e+06	2.04814e+07	2.45762e+07	2.08878e+07	High	High	Peak Found	High	High	Peak Found	Not Found
FALSE	High	Master Protein	Glyma.02G002000.2.p	K12502 - MPBQ/MSBQ methyltransferase (VTE3, APG1) (1 of 3)	0	68.413	24	6	27	2	2	343	38.8	9.5	95.36	6	0.673	0.316	0.01	1	0.0296079	NA	135.3	201.2	63.5	NA	12.61	25.23	28.85	NA	1.79695e+07	1.46825e+07	1.44164e+07	2.70893e+07	2.18282e+07	1.61492e+07	6.88936e+06	7.51234e+06	4.15711e+06	NA	NA	NA	High	High	Not Found	High	High	Peak Found	High
FALSE	High	Master Protein	Glyma.20G007400.1.p	PTHR13697:SF1 - PYROPHOSPHATE--FRUCTOSE 6-PHOSPHATE 1-PHOSPHOTRANSFERASE SUBUNIT ALPHA 1-RELATED (1 of 2)	0	10.747	6	3	7	2	2	617	67.6	6.96	5.16	3	0.233	0.316	0.263	0.0291784	0.0393602	0.0363677	51.5	220.7	69.7	58.1	27.54	29.26	33.65	10.36	3.6068e+06	4.43436e+06	2.50481e+06	1.0868e+07	1.54494e+07	1.98804e+07	2.82175e+06	4.8822e+06	5.76659e+06	4.06677e+06	4.81113e+06	4.01589e+06	High	Peak Found	Not Found	Peak Found	High	Peak Found	Peak Found
FALSE	High	Master Protein	Glyma.06G097000.1.p	PTHR14154:SF15 - PEPTIDYL-PROLYL CIS-TRANS ISOMERASE, PUTATIVE-RELATED (1 of 2)	0	40.572	44	5	20	3	5	189	20.4	9.79	42.07	5	0.8	0.314	0.654	1	0.0277281	0.754641	115.7	144.5	45.3	94.5	19.84	17.79	34.51	9.96	1.58803e+07	1.05938e+07	1.3702e+07	1.8076e+07	1.7121e+07	1.2744e+07	7.29275e+06	3561390	5.36789e+06	1.21922e+07	1.1199e+07	9.98069e+06	High	High	Peak Found	High	High	Peak Found	High
FALSE	High	Master Protein	Glyma.02G047500.1.p	PTHR11544//PTHR11544:SF50 - COLD SHOCK DOMAIN CONTAINING PROTEINS // SUBFAMILY NOT NAMED (1 of 2)	0	32.971	19	4	20	0	4	252	24.7	7.69	56.46	4	0.368	0.313	0.991	0.0919895	0.0320996	1	55.1	149.7	46.8	148.4	8.78	29.89	20.6	25.08	6.43527e+06	7.14934e+06	7.67537e+06	1.94101e+07	1.24978e+07	2.3383e+07	7.47259e+06	6073179	4.93907e+06	1.92395e+07	1.46343e+07	2.43667e+07	High	High	High	High	High	High	High
FALSE	High	Master Protein	Glyma.02G017100.1.p	PTHR33509:SF5 - LATE EMBRYOGENESIS ABUNDANT 3 (LEA3) FAMILY PROTEIN (1 of 8)	0	19.541	27	2	18	0	2	98	10.3	9.7	51.29	2	0.458	0.311	0.261	0.149773	0.0210272	0.014849	90.3	197	61.4	51.4	11.75	23.13	17.86	25.61	4.28792e+07	4.37632e+07	3.50974e+07	6.18877e+07	9.35943e+07	9.73878e+07	3.44542e+07	2.91533e+07	2.40236e+07	2.31465e+07	2.4412e+07	3.61019e+07	High	High	High	High	High	High	Peak Found
FALSE	High	Master Protein	Glyma.08G065000.1.p	PF00564 - PB1 domain (PB1) (1 of 72)	0	70.614	29	9	32	6	6	476	52	5.52	83.18	9	0.01	0.307	1.226	NA	0.00624137	0.483586	NA	157.9	48.4	193.6	NA	10.37	18.19	14.3	NA	NA	NA	1.37991e+07	1.30117e+07	1.5869e+07	4.23282e+06	5.4963e+06	3.93625e+06	1.68698e+07	1.69152e+07	2.14527e+07	High	High	High	High	High	High	Peak Found
FALSE	High	Master Protein	Glyma.09G004300.1.p	PTHR10374:SF17 - GLYOXALASE I HOMOLOG (1 of 3)	0	48.964	27	8	44	0	3	324	36.9	7.09	110.79	8	0.985	0.306	0.01	1	0.00973449	NA	171.9	174.6	53.4	NA	1.92	18.23	19.67	NA	5.41039e+06	5.44012e+06	5.60595e+06	6.10281e+06	5.52525e+06	4.22267e+06	1.41119e+06	2.08834e+06	1.69056e+06	NA	NA	NA	High	High	Not Found	High	High	Peak Found	High
FALSE	High	Master Protein	Glyma.14G064500.1.p	PTHR10795//PTHR10795:SF348 - PROPROTEIN CONVERTASE SUBTILISIN/KEXIN // SUBFAMILY NOT NAMED (1 of 14)	0	48.049	16	6	31	5	5	645	69.5	8.43	94.83	6	0.571	0.302	0.371	0.00119594	5.53e-05	3.3e-05	101.7	178.3	53.8	66.2	6.18	2.53	8.46	2.57	1.95815e+07	2.21562e+07	2.11085e+07	3.82273e+07	3.63827e+07	3.69866e+07	1.22086e+07	1.03109e+07	1.11679e+07	1.41063e+07	1.3401e+07	1.37318e+07	High	High	Peak Found	High	High	Peak Found	High
FALSE	High	Master Protein	Glyma.01G163900.1.p	K03094 - S-phase kinase-associated protein 1 (SKP1, CBF3D) (1 of 7)	0	52.09	39	6	49	0	2	155	17.5	4.65	155.97	6	0.751	0.299	0.606	1	0.0483464	0.711047	113	150.6	45.1	91.3	9.09	43.3	22.67	8.68	1.29387e+07	1.21836e+07	1.07942e+07	2.25145e+07	1.62294e+07	8.80435e+06	5.90291e+06	3.71591e+06	4.85692e+06	9.84285e+06	8.66373e+06	1.02723e+07	High	High	High	High	High	High	Not Found
FALSE	High	Master Protein	Glyma.05G174400.1.p	PTHR32091:SF0 - EUKARYOTIC INITIATION FACTOR 4B-RELATED (1 of 3)	0	135.654	47	23	113	0	10	531	57.8	8.54	324.9	23	0.493	0.291	2.849	0.549106	0.0379682	0.129968	42.6	86.3	25.1	245.9	14.69	12.82	33.51	47.73	21273123	1.84964e+07	2.48039e+07	4.12121e+07	4.31171e+07	5.21266e+07	7.17628e+06	1.25555e+07	1.4599e+07	7.60785e+07	2.02369e+08	1.22835e+08	Peak Found	High	High	Peak Found	Peak Found	High	Peak Found
FALSE	High	Master Protein	Glyma.08G112000.1.p	PTHR13020 - UBIQUITIN-ASSOCIATED UBA/UBX DOMAIN-CONTAINING (1 of 3)	0	88.428	36	9	51	5	5	415	46.7	6.33	151.88	9	0.388	0.289	1.018	0.0841484	0.0156407	1	57.7	148.4	42.8	151.1	27.14	29.76	25.4	15.31	8.81273e+06	9.1569e+06	1.39833e+07	2.35774e+07	2.25667e+07	3.73988e+07	6.13097e+06	6.80508e+06	9.74219e+06	2.35263e+07	2.39932e+07	3.06562e+07	High	High	High	High	High	High	Peak Found
FALSE	High	Master Protein	Glyma.09G213800.1.p	PTHR10381//PTHR10381:SF24 - ATP-DEPENDENT CLP PROTEASE PROTEOLYTIC SUBUNIT // SUBFAMILY NOT NAMED (1 of 2)	0	169.847	58	13	136	2	2	306	33.3	6.57	384.91	13	0.629	0.288	0.01	1	0.0269735	NA	131.2	208.6	60.2	NA	30.45	17.2	13.93	NA	4.33079e+06	7.20397e+06	4.45788e+06	7.60201e+06	5.39984e+06	7.08587e+06	2.56714e+06	2043855	2.02373e+06	NA	NA	NA	High	Peak Found	Not Found	High	High	Not Found	Peak Found
FALSE	High	Master Protein	Glyma.12G036400.1.p	PTHR13690:SF76 - BASIC-LEUCINE ZIPPER (BZIP) TRANSCRIPTION FACTOR FAMILY PROTEIN (1 of 6)	0	13.88	6	3	5	0	3	548	60	6.86	14.37	3	0.01	0.285	1.331	NA	0.0164994	0.880042	NA	152.9	43.5	203.5	NA	22.42	8.3	27.72	NA	NA	NA	1.02857e+07	6.70224e+06	7.71875e+06	2.12604e+06	2.19774e+06	2.48225e+06	1.02714e+07	7.68999e+06	1.34895e+07	Not Found	Not Found	Not Found	Not Found	Not Found	Peak Found	Peak Found
FALSE	High	Master Protein	Glyma.19G130800.1.p	1.4.7.1 - Glutamate synthase (ferredoxin) / Ferredoxin-dependent glutamate synthase (1 of 2)	0	673.778	50	58	445	0	13	1581	172.1	7.11	1398.24	58	0.483	0.279	0.604	0.707932	0.0352288	0.611975	81.7	169.1	47.1	102.1	17.87	21.36	4.63	40.39	7.53248e+07	5.42102e+07	5.83351e+07	1.24563e+08	8.23918e+07	1.20795e+08	3.40409e+07	3.12322e+07	3.36744e+07	1.00873e+08	7.29006e+07	4.26262e+07	High	High	High	High	High	Peak Found	High
FALSE	High	Master Protein	Glyma.10G163300.1.p	K11275 - histone H1/5 (H1_5) (1 of 6)	0	27.467	19	3	12	1	1	190	19.9	10.86	28.86	3	0.634	0.275	2.129	0.605311	0.00687595	0.104092	62.8	99.1	27.3	210.9	7.38	20.9	30.83	21.68	2.30626e+06	2.65299e+06	2.39097e+06	3.4788e+06	3.77171e+06	5.09259e+06	1.03893e+06	1.15817e+06	609732	1.08876e+07	7.3033e+06	8.02853e+06	Peak Found	Peak Found	Not Found	Peak Found	Peak Found	High	Not Found
FALSE	High	Master Protein	Glyma.17G240400.1.p	K13126 - polyadenylate-binding protein (PABPC) (1 of 14)	0	142.206	28	14	105	4	9	654	71.9	7.15	306.08	14	0.887	0.273	1.264	1	0.021721	1	103.7	116.8	31.8	147.7	5.84	23.61	17.49	30.82	1.00577e+08	1.09567e+08	1.12675e+08	1.40619e+08	8.66107e+07	1.23491e+08	3.23949e+07	3.36586e+07	4.40938e+07	1.56058e+08	97426091	186271609	High	High	High	High	High	High	High
FALSE	High	Master Protein	Glyma.16G129900.1.p	K09578 - peptidyl-prolyl cis-trans isomerase NIMA-interacting 1 (PIN1) (1 of 2)	0	72.2	55	6	64	2	2	126	13.6	9.54	179.6	6	0.176	0.273	1.06	0.0187086	0.0284775	1	28	159.5	43.5	169	17.01	48.16	29.73	35.83	8.90718e+06	8.23463e+06	1.13037e+07	5.07164e+07	4.76367e+07	1.05914e+08	9.49303e+06	1.38374e+07	1.75991e+07	4.74467e+07	5.37353e+07	8.9696e+07	High	High	Peak Found	High	High	High	High
FALSE	High	Master Protein	Glyma.06G306400.1.p	NA	0	10.499	66	2	7	2	2	67	6.7	9.99	15.5	2	0.714	0.268	0.606	0.739445	0.0364461	0.614036	110.3	154.6	41.5	93.6	44.15	11.75	8.85	19.71	2.63972e+06	6.88791e+06	6.59518e+06	8.06081e+06	1.02137e+07	9.24022e+06	2.19131e+06	2.48007e+06	2.61146e+06	6.52433e+06	4.36496e+06	5.59531e+06	Peak Found	Not Found	High	Not Found	Not Found	High	Peak Found
FALSE	High	Master Protein	Glyma.02G033900.1.p	K00797 - spermidine synthase (speE, SRM) (1 of 10)	0	29.374	16	4	21	0	3	340	37.4	5	47.99	4	0.204	0.258	0.01	0.00662436	0.00641557	NA	55.8	273.6	70.6	NA	20.93	23.77	9.39	NA	910635	1.34399e+06	1.00674e+06	7.14965e+06	4.75379e+06	4.93498e+06	1.2735e+06	1160596	1.4005e+06	NA	NA	NA	High	High	High	High	High	Not Found	High
FALSE	High	Master Protein	Glyma.05G004900.5.p	PF01903 - CbiX (CbiX) (1 of 2)	0	12.355	15	2	2	0	2	211	23.2	6.73	5.61	2	0.785	0.251	0.01	1	0.0204503	NA	154.2	196.5	49.3	NA	4.83	38.75	28.1	NA	3.14933e+06	3.16159e+06	2.89897e+06	6.54647e+06	3.13959e+06	4.01333e+06	598799	1.00784e+06	1.04849e+06	NA	NA	NA	Not Found	Peak Found	Not Found	Peak Found	Peak Found	High	Not Found
FALSE	High	Master Protein	Glyma.19G235100.1.p	3.1.8.1 - Aryldialkylphosphatase / Phosphotriesterase (1 of 1)	0	18.195	9	6	9	0	6	698	77.6	6.84	15.39	6	0.437	0.238	0.308	0.721045	0.0182269	0.0380397	88.2	201.7	48	62.2	50.77	15.08	12.46	3.88	1.0673e+07	1.15793e+07	2.49352e+07	2.77565e+07	2.06893e+07	2.64835e+07	5.70604e+06	7.29269e+06	6.29981e+06	7.94589e+06	8.57482e+06	8.1668e+06	High	High	Peak Found	High	High	Not Found	Peak Found
FALSE	High	Master Protein	Glyma.16G140800.1.p	PTHR11375 - ACIDIC LEUCINE-RICH NUCLEAR PHOSPHOPROTEIN 32 (1 of 2)	0	46.138	21	6	21	4	4	462	51.6	3.97	50.97	6	0.319	0.238	1.596	0.0387076	0.0147067	1	40.5	126.8	30.2	202.5	19.77	52.89	25.16	10.26	1.26388e+06	1.75508e+06	1.87076e+06	4.91078e+06	5.49373e+06	1.20355e+07	1.015e+06	1.68499e+06	1.30613e+06	9.33701e+06	7.61171e+06	8.77073e+06	High	High	High	High	High	High	High
FALSE	High	Master Protein	Glyma.09G202900.1.p	PTHR30620:SF19 - BETA-D-XYLOSIDASE 6-RELATED (1 of 1)	0	8.301	4	3	5	0	3	780	85.1	5.71	8.96	3	1	0.233	0.01	1	0.0120267	NA	179.2	179.2	41.7	NA	10.02	36.4	17.2	NA	1.18324e+07	1.43259e+07	1.24978e+07	1.06487e+07	1.24979e+07	2.06346e+07	2.90824e+06	3.72951e+06	2.72039e+06	NA	NA	NA	High	High	Not Found	Peak Found	Peak Found	Peak Found	High
FALSE	High	Master Protein	Glyma.16G217600.1.p	PF00076 - RNA recognition motif. (a.k.a. RRM, RBD, or RNP domain) (RRM_1) (1 of 477)	0	14.631	16	3	31	1	3	180	20	9.99	69.57	3	0.166	0.231	0.698	0.0046587	0.0068605	0.953958	31.7	190.9	44.2	133.3	18.91	22.64	11.88	28.69	8.61617e+06	1.21963e+07	9.3097e+06	4.21224e+07	5.61444e+07	6.70015e+07	1.2057e+07	1.29896e+07	1.51604e+07	3.91888e+07	3.3253e+07	5.70466e+07	High	High	High	High	High	High	High
FALSE	High	Master Protein	Glyma.20G153600.1.p	5.4.2.5 - Phosphoglucomutase (glucose-cofactor) / Glucose-1-phosphate phosphotransferase (1 of 2)	0	112.072	31	13	71	0	3	628	68.4	6.35	229.96	13	0.31	0.227	0.01	0.0538118	0.0162983	NA	80.7	260.2	59.1	NA	26.36	43.87	11.3	NA	1.19499e+06	709126	890477	2.87338e+06	2.81566e+06	5.73843e+06	652606	552730	691062	NA	NA	NA	High	High	Not Found	High	High	Peak Found	Not Found
FALSE	High	Master Protein	Glyma.08G246300.1.p	K01180 - endo-1,3(4)-beta-glucanase (E3.2.1.6) (1 of 9)	0	40.074	15	7	14	2	7	653	73.4	7.17	29.95	7	0.896	0.222	0.886	1	0.000582589	0.773173	119.3	133.1	29.6	117.9	2.74	16.8	17.79	10.55	7.04098e+06	6.73795e+06	7.09038e+06	9.75573e+06	7.85547e+06	7.06693e+06	2.12553e+06	1.49337e+06	1.74687e+06	5.92202e+06	7.27848e+06	6.95885e+06	High	High	Not Found	High	High	High	High
FALSE	High	Master Protein	Glyma.08G179600.1.p	K00430 - peroxidase (E1.11.1.7) (1 of 157)	0	11.625	10	3	11	3	3	321	34.5	8.9	22.2	3	0.886	0.207	0.589	1	0.0032408	0.205013	132.1	149.1	30.9	87.9	7.7	5.33	14.58	32.36	1.60418e+07	1.84751e+07	1.64252e+07	1.85449e+07	1.69588e+07	1.86963e+07	3.52399e+06	4.65597e+06	3.84019e+06	1.0927e+07	7.85833e+06	1.51477e+07	High	Peak Found	Peak Found	High	High	Not Found	High
FALSE	High	Master Protein	Glyma.09G070700.1.p	K08963 - methylthioribose-1-phosphate isomerase (mtnA) (1 of 1)	0	12.522	11	3	5	1	3	374	40	6.8	6.76	3	0.407	0.206	0.257	0.117669	0.0115936	0.0146151	87	214	44	55	5.37	15.43	39.99	25.2	8.02746e+06	7.27687e+06	7.38393e+06	2.11028e+07	1.54757e+07	1.81533e+07	3.5874e+06	3.73064e+06	6.95085e+06	6.63983e+06	4.66819e+06	4.1833e+06	Peak Found	Peak Found	High	High	High	Not Found	High
FALSE	High	Master Protein	Glyma.07G032800.1.p	K02265 - cytochrome c oxidase subunit 5b (COX5B) (1 of 3)	0	58.539	28	7	58	0	4	162	17.7	5.38	167.08	7	0.208	0.202	0.868	0.0467434	0.0479004	1	36.6	175.6	35.5	152.4	26.08	49.59	17.33	52.05	8.40452e+06	5.09447e+06	8.37034e+06	3.14831e+07	4.01492e+07	7.79965e+07	8.11269e+06	7.44575e+06	1.03011e+07	5.53046e+07	1.78755e+07	3.48492e+07	High	High	Peak Found	High	High	High	Peak Found
FALSE	High	Master Protein	Glyma.14G012200.1.p	PTHR12758:SF13 - GBF-INTERACTING PROTEIN 1 (1 of 4)	0	16.792	4	3	4	0	2	773	81.2	6.95	8	3	0.232	0.201	1.052	0.00886983	0.00341668	1	37.4	161	32.3	169.4	10.65	33.93	9.24	8.36	902206	1.06507e+06	880042	3.88668e+06	2.53806e+06	5.15723e+06	839022	697020	779732	4.08872e+06	3.96022e+06	4.62575e+06	Peak Found	Not Found	Not Found	Peak Found	Peak Found	High	Not Found
FALSE	High	Master Protein	Glyma.08G302600.1.p	K00830 - alanine-glyoxylate transaminase / serine-glyoxylate transaminase / serine-pyruvate transaminase (AGXT) (1 of 2)	0	246.488	51	20	184	6	6	401	44.2	8.13	582.27	20	0.601	0.19	0.068	1	0.0129922	0.00184974	129.3	215	40.9	14.7	12.11	14	48.11	18.34	1.01719e+08	8.04261e+07	9.76193e+07	1.72168e+08	1.30618e+08	1.62296e+08	1.38538e+07	4.1109e+07	3.09028e+07	9.5595e+06	1.11039e+07	1.37169e+07	High	High	High	High	High	Peak Found	High
FALSE	High	Master Protein	Glyma.02G101100.1.p	PTHR31342:SF7 - PROTEIN CHUP1, CHLOROPLASTIC (1 of 4)	0	70.246	19	14	35	5	5	977	108.9	5.57	72.69	14	1.098	0.185	0.631	1	0.00341668	0.196436	150.7	137.3	25.4	86.6	15.6	34.43	7.98	21.84	8.41759e+06	9.54946e+06	6.96297e+06	6.14781e+06	7.66538e+06	1.18324e+07	1.26434e+06	1.41944e+06	1.47867e+06	5.36063e+06	4.83443e+06	3.43986e+06	Peak Found	Peak Found	High	Peak Found	High	Peak Found	Peak Found
FALSE	High	Master Protein	Glyma.18G155700.1.p	K05579 - NAD(P)H-quinone oxidoreductase subunit H (ndhH) (1 of 1)	0	17.388	9	2	14	1	2	333	39.4	5.11	33.41	2	0.591	0.171	0.199	0.368808	0.00582179	0.00716317	120.6	204	34.8	40.6	36.85	12.45	10.8	26.51	9.95413e+06	4.50384e+06	8.3971e+06	1.67723e+07	1.42058e+07	1.32197e+07	2.42399e+06	2.20498e+06	2.73242e+06	2.82872e+06	2.29765e+06	3.85941e+06	High	High	Not Found	High	High	Peak Found	Not Found
FALSE	High	Master Protein	Glyma.04G242300.1.p	PTHR33021:SF9 - BASIC BLUE PROTEIN (1 of 5)	0	33.289	28	2	15	0	2	140	15.4	9	42.28	2	0.409	0.171	0.636	0.0690613	0.00915478	0.536715	73.8	180.6	30.8	114.8	36.94	32.45	20.01	9.32	9.53216e+06	2.06004e+07	1.96161e+07	4.08431e+07	4.80053e+07	7.43683e+07	8.19376e+06	7.89687e+06	1.11851e+07	3.05264e+07	2.81595e+07	3.38843e+07	High	High	Not Found	High	High	High	Not Found
FALSE	High	Master Protein	Glyma.04G227400.1.p	K03626 - nascent polypeptide-associated complex subunit alpha (EGD2, NACA) (1 of 8)	0	139.197	53	7	152	1	1	223	24.2	4.45	516.02	7	0.211	0.167	1.088	0.0307059	0.0121629	1	34.3	162.2	27.1	176.5	24.94	40.86	36.48	20.44	8.47978e+06	7.03903e+06	5.06986e+06	3.33182e+07	2.41474e+07	5.37305e+07	3.60851e+06	5557978	7.71172e+06	3.62585e+07	2.69054e+07	4.08008e+07	Not Found	High	Not Found	High	Peak Found	High	Not Found
FALSE	High	Master Protein	Glyma.12G181400.1.p	PTHR31802:SF5 - HISTONE DEACETYLASE HDT2-RELATED (1 of 4)	0	17.389	10	4	20	3	3	307	33.3	5.02	41.42	4	0.124	0.156	0.285	0.023025	0.0364461	0.175057	31.7	255.6	39.8	72.9	27.16	33.38	43.6	32.47	4.064e+06	2.35116e+06	3.82166e+06	3.12651e+07	3.08341e+07	1.60011e+07	3.12859e+06	4.79697e+06	7.5922e+06	6.23893e+06	8.79572e+06	1.20964e+07	Not Found	Peak Found	High	Peak Found	High	High	Peak Found
FALSE	High	Master Protein	Glyma.08G315200.5.p	PTHR34682:SF1 - AT HOOK MOTIF-CONTAINING PROTEIN (1 of 2)	0	8.888	9	3	4	0	3	446	47.8	6.55	5.72	3	0.01	0.156	1.055	NA	0.00432527	1	NA	180.9	28.2	190.9	NA	13.88	31.08	4.44	NA	NA	NA	1.0019e+07	1.16887e+07	1.32523e+07	1.00813e+06	1.88276e+06	1.82126e+06	1.22533e+07	1.32584e+07	1.23302e+07	Not Found	Not Found	Not Found	Peak Found	Peak Found	High	Not Found
FALSE	High	Master Protein	Glyma.11G122700.1.p	K01723 - hydroperoxide dehydratase (AOS) (1 of 4)	0	30.466	21	7	16	7	7	478	53.5	6.87	33.78	7	0.63	0.155	0.01	1	0.0301603	NA	141.2	224	34.8	NA	25.79	25.45	44.07	NA	6.75699e+06	7.96042e+06	1.10509e+07	7.80414e+06	1.27197e+07	1.26327e+07	1.96334e+06	2.97337e+06	1.18092e+06	NA	NA	NA	High	High	High	High	High	Peak Found	Peak Found
FALSE	High	Master Protein	Glyma.04G107900.1.p	PF00582 - Universal stress protein family (Usp) (1 of 74)	0	68.659	47	6	57	0	2	167	18.7	5.96	132.4	6	0.353	0.149	0.01	0.364307	0.0273614	NA	94	266.3	39.7	NA	30.19	44.61	14.24	NA	7.13999e+06	3.85681e+06	5.34155e+06	2.05416e+07	7.6954e+06	1.51417e+07	2.38526e+06	2257402	1.80304e+06	NA	NA	NA	High	High	Not Found	High	High	High	Not Found
FALSE	High	Master Protein	Glyma.01G238000.1.p	PTHR19370//PTHR19370:SF127 - NADH-CYTOCHROME B5 REDUCTASE // SUBFAMILY NOT NAMED (1 of 4)	0	46.97	52	4	31	1	4	147	16.1	5.53	118.21	4	0.446	0.144	0.853	0.382468	0.00468486	1	73	163.7	23.6	139.6	23.87	12.97	39.57	26.34	2.61569e+07	2.49908e+07	3.77874e+07	5.44133e+07	5.86221e+07	6.97067e+07	8.46113e+06	5.53363e+06	1.24915e+07	4.48846e+07	5.00128e+07	7.25234e+07	High	High	High	High	High	High	High
FALSE	High	Master Protein	Glyma.06G014500.1.p	PTHR31407:SF17 - PSBP DOMAIN-CONTAINING PROTEIN 3, CHLOROPLASTIC (1 of 2)	0	66.95	34	7	54	0	3	248	27.4	5.31	146.05	7	0.219	0.144	0.855	0.107717	0.0204974	1	39.5	180.4	25.9	154.2	21.46	45.76	46.67	20.74	1.12278e+07	8.13464e+06	1.25982e+07	2.83261e+07	7.57103e+07	5.13079e+07	3.33414e+06	7.37693e+06	9.5417e+06	6.11137e+07	4.29817e+07	4.38456e+07	High	Peak Found	High	Not Found	Peak Found	High	Peak Found
FALSE	High	Master Protein	Glyma.03G128300.2.p	1.4.7.1 - Glutamate synthase (ferredoxin) / Ferredoxin-dependent glutamate synthase (1 of 2)	0	665.406	50	59	440	0	14	1621	176.6	6.84	1369.34	59	0.667	0.135	0.279	0.458832	0.00319345	0.0143131	128.2	192.1	26	53.6	24.39	22.07	36.25	8.13	1.04146e+08	6.48201e+07	1.01568e+08	2.12333e+08	1.52167e+08	143781815	2.94177e+07	2.0615e+07	1.3996e+07	3.81791e+07	4.4895e+07	4.24941e+07	High	High	High	High	High	Peak Found	High
FALSE	High	Master Protein	Glyma.03G262300.1.p	K08908 - light-harvesting complex I chlorophyll a/b binding protein 2 (LHCA2) (1 of 4)	0	61.243	14	2	32	0	1	308	33.4	7.72	136.72	2	0.465	0.124	0.138	1	0.0369108	0.029185	107.8	231.6	28.6	31.9	19.19	21.44	70.72	36.63	2.62792e+07	1.82892e+07	2.03324e+07	4.36805e+07	3.20903e+07	4.97485e+07	5.39677e+06	1.11647e+07	2.37722e+06	6.02414e+06	2.89336e+06	6.12016e+06	High	High	Not Found	High	High	Not Found	High
FALSE	High	Master Protein	Glyma.06G128000.1.p	PTHR12356:SF3 - NUCLEAR MIGRATION PROTEIN NUDC (1 of 2)	0	54.107	39	9	41	3	3	299	34.2	5.81	80.24	9	0.788	0.119	1.062	1	0.0420364	1	106.2	134.7	16	143.1	14.15	13.27	87.1	27.24	7.69711e+06	9.82038e+06	7.80925e+06	1.19126e+07	9.9078e+06	9.27946e+06	550123	3.36381e+06	1.17506e+06	16349743	1.05243e+07	1.04394e+07	Peak Found	Peak Found	Peak Found	Peak Found	Peak Found	High	Peak Found
FALSE	High	Master Protein	Glyma.05G104200.1.p	K03097 - casein kinase II subunit alpha (CSNK2A) (1 of 6)	0	17.513	11	3	6	0	3	411	48.2	8.98	11.11	3	0.156	0.118	2.415	0.0515714	0.0215062	1	16.9	108.4	12.8	261.9	44.87	72.66	26.2	41.71	1.92206e+06	3.99677e+06	5.21608e+06	2.18025e+07	2.56414e+07	7.49599e+07	3.079e+06	1.85057e+06	3.02793e+06	6.19268e+07	6.20319e+07	2.58905e+07	High	High	Peak Found	High	Peak Found	Peak Found	Not Found
FALSE	High	Master Protein	Glyma.06G189900.1.p	PTHR24093:SF264 - ATPASE 4, PLASMA MEMBRANE-TYPE (1 of 6)	0	208.962	24	20	130	0	6	956	105.2	6.84	394.79	20	0.945	0.11	0.404	1	0.00248811	0.0698649	153.7	162.7	17.8	65.7	28.03	10.76	30.23	21.41	1.09005e+07	8.26632e+06	6.17526e+06	9.16716e+06	7.42477e+06	8.7467e+06	1.5405e+06	959124	927087	2.89492e+06	4.4386e+06	3.53527e+06	High	High	Not Found	High	High	Not Found	High
FALSE	High	Master Protein	Glyma.02G270000.1.p	K14012 - UBX domain-containing protein 1 (SHP1, UBX1, NSFL1C) (1 of 4)	0	45.498	23	8	29	0	3	408	44.8	5.47	73.54	8	0.477	0.11	0.841	0.247663	0.0032408	1	78.6	164.8	18.1	138.6	3.28	10.2	39.3	33.79	5.97725e+06	6.17944e+06	5.78708e+06	1.25336e+07	1.15776e+07	1.41506e+07	1.35678e+06	1373538	2.56685e+06	1.05375e+07	9.60674e+06	1.73392e+07	High	High	High	Peak Found	High	High	High
FALSE	High	Master Protein	Glyma.06G137700.1.p	K03626 - nascent polypeptide-associated complex subunit alpha (EGD2, NACA) (1 of 8)	0	144.859	60	8	160	2	2	223	24.2	4.45	562.66	8	0.223	0.11	0.736	0.0218448	0.00267668	0.92393	43.2	193.3	21.2	142.3	13.66	28.33	25.79	36.15	8.73556e+06	1.15091e+07	1.02958e+07	4.61273e+07	3.75077e+07	6.49435e+07	5.47514e+06	5.06158e+06	3.24775e+06	4.93236e+07	3.39538e+07	2.37107e+07	High	High	Peak Found	High	High	High	Not Found
FALSE	High	Master Protein	Glyma.18G133400.1.p	K03248 - translation initiation factor 3 subunit G (EIF3G) (1 of 2)	0	80.706	49	12	81	1	1	290	32.2	8.21	227.67	12	0.01	0.106	0.381	NA	0.000387448	0.0027232	NA	268.9	28.6	102.5	NA	7.76	15.15	5.48	NA	NA	NA	1.80587e+07	2.01276e+07	1.73646e+07	1.92187e+06	2.00096e+06	1.49283e+06	6.26327e+06	6.91068e+06	6.88325e+06	High	Not Found	Not Found	High	High	High	Not Found
FALSE	High	Master Protein	Glyma.13G242800.1.p	PTHR31008:SF6 - CSL1 (1 of 2)	0	6.108	3	2	2	1	2	919	102.3	6.51	1.97	2	1.375	0.104	0.214	1	0.0463444	0.281463	204.2	148.5	15.4	31.8	33.64	60.34	37.87	13.79	4.38164e+07	2.50116e+07	5.10532e+07	3.92925e+07	3.1868e+07	8.56339e+06	3.30434e+06	3.33984e+06	1.53437e+06	6.89944e+06	6.83234e+06	5.34755e+06	Peak Found	Peak Found	Peak Found	Peak Found	Peak Found	High	Peak Found
FALSE	High	Master Protein	Glyma.01G060900.2.p	PTHR33403:SF5 - PROTEIN SPIRAL1-LIKE 2-RELATED (1 of 2)	0	43.184	44	2	13	0	2	108	10.7	8.51	45.86	2	0.509	0.103	0.755	0.750673	0.011953	1	86.1	169	17.4	127.5	15.24	50.32	52.93	22.74	4.99559e+06	6.47691e+06	6.68846e+06	1.27203e+07	8.29526e+06	2.25778e+07	823691	2.37931e+06	1.3085e+06	7.7444e+06	1.2203e+07	9.59771e+06	High	High	Peak Found	High	High	High	High
FALSE	High	Master Protein	Glyma.01G080200.1.p	K01527 - nascent polypeptide-associated complex subunit beta (EGD1, BTF3) (1 of 4)	0	84.522	65	9	72	5	5	159	17.4	6.6	272.17	9	0.145	0.094	0.833	0.00210436	0.0009442	1	28	193	18.2	160.7	35.05	10.23	14.31	17.65	2.44155e+06	4.87045e+06	4.98522e+06	3.89638e+07	3.22459e+07	3.35131e+07	2.48058e+06	3.1631e+06	3.25952e+06	2.79122e+07	3.13242e+07	2.18951e+07	Not Found	High	Peak Found	High	Peak Found	High	Not Found
FALSE	High	Master Protein	Glyma.15G136800.1.p	K02945 - small subunit ribosomal protein S1 (RP-S1, rpsA) (1 of 6)	0	106.492	41	16	211	1	4	403	44.5	5.82	484.63	16	0.513	0.09	1.577	1	0.0352288	0.964672	64.5	125.8	11.4	198.3	25.15	3.89	88.51	31.33	7.85866e+06	1.29492e+07	9.81662e+06	1.99798e+07	1.84913e+07	1.91326e+07	1.26166e+06	6.14896e+06	1.72987e+06	4.63191e+07	3.01635e+07	2.60614e+07	High	High	High	High	High	High	High
FALSE	High	Master Protein	Glyma.07G038500.1.p	PTHR31238:SF21 - GERMIN-LIKE PROTEIN SUBFAMILY 3 MEMBER 3 (1 of 5)	0	71.093	14	3	30	0	2	209	22	7.11	141.88	3	0.612	0.088	0.679	0.689441	0.000811871	0.876747	102.9	168.1	14.8	114.2	12.47	33.48	15.02	15.88	3.65673e+07	2.9405e+07	3.70537e+07	7.46045e+07	3.67162e+07	5.97709e+07	4.26572e+06	5772388	5.25811e+06	4.06053e+07	3.48843e+07	4.79177e+07	High	High	Not Found	High	High	High	Peak Found
FALSE	High	Master Protein	Glyma.05G106100.1.p	K03937 - NADH dehydrogenase (ubiquinone) Fe-S protein 4 (NDUFS4) (1 of 2)	0	49.496	49	6	29	3	4	146	16.3	9.8	57.57	6	0.141	0.076	1.202	0.00119594	0.000388638	1	23.2	165.4	12.5	198.9	5.12	15.29	26.55	20.98	7.95579e+06	7.77537e+06	8.56623e+06	4.97239e+07	5.66151e+07	6.72864e+07	3.27758e+06	5.60137e+06	4.28756e+06	5.3319e+07	6.80776e+07	8.17244e+07	Peak Found	High	Peak Found	Peak Found	Peak Found	High	Not Found
FALSE	High	Master Protein	Glyma.03G017200.1.p	K12893 - splicing factor, arginine/serine-rich 4/5/6 (SFRS4_5_6) (1 of 6)	0	10.431	11	2	5	0	2	252	29.5	10.15	10.02	2	0.162	0.067	0.563	0.0181703	0.00330314	0.767734	36.1	223.3	14.9	125.7	28.24	49.95	20.64	6.52	897255	1.54912e+06	1.5482e+06	5.07326e+06	9.56882e+06	1.48985e+07	478502	638712	729407	5.38763e+06	5.84217e+06	5.14064e+06	Peak Found	Peak Found	Not Found	Peak Found	High	Peak Found	Not Found
FALSE	High	Master Protein	Glyma.14G165000.1.p	K10534 - nitrate reductase (NAD(P)H) (NR) (1 of 4)	0	20.832	8	4	15	3	3	873	98.2	6.92	30.74	4	0.363	0.066	2.86	0.669868	0.0145855	0.307322	33.8	93.3	6.2	266.7	39.79	67.87	12.03	21.19	2.58377e+07	6.14474e+07	4.88178e+07	2.43655e+08	5.02603e+07	1.34657e+08	7.3175e+06	8949650	9.19734e+06	2.87256e+08	3.85169e+08	4.43109e+08	High	High	Not Found	Peak Found	Peak Found	Peak Found	Peak Found
FALSE	High	Master Protein	Glyma.06G089700.1.p	K19035 - 50S ribosomal protein 6 (PSRP6) (1 of 1)	0	47.091	47	4	39	4	4	98	10.4	10.27	151.99	4	0.249	0.054	2.14	0.783057	0.0296079	0.833249	28.9	116.2	6.3	248.6	50.36	81.52	54.96	12.48	2.36526e+07	2.34912e+07	5.25647e+07	9.49464e+07	3.93513e+07	2.33333e+08	5.17206e+06	4.91132e+06	1.20657e+07	2.39111e+08	2.03175e+08	1.88076e+08	High	High	High	High	High	High	Peak Found
FALSE	High	Master Protein	Glyma.03G064800.1.p	KOG4374 - RNA-binding protein Bicaudal-C (1 of 9)	0	19.986	27	5	17	3	4	207	23.1	9.8	38.98	5	0.776	0.053	0.607	1	0.00468486	1	127.3	164.2	8.8	99.7	50.57	30.78	9.28	21.69	6.07963e+07	5.89475e+07	1.93083e+07	8.69257e+07	7.59947e+07	4.56288e+07	4.42834e+06	4.05335e+06	3.67605e+06	3.8389e+07	5.89397e+07	4.61626e+07	Peak Found	High	Peak Found	Peak Found	Peak Found	High	Not Found
FALSE	High	Master Protein	Glyma.06G110400.1.p	PTHR11544//PTHR11544:SF57 - COLD SHOCK DOMAIN CONTAINING PROTEINS // SUBFAMILY NOT NAMED (1 of 2)	0	51.14	30	3	47	1	1	176	18.3	8.73	181.77	3	0.13	0.048	0.748	0.140867	0.0133233	1	27	207.7	10	155.3	32.11	28.26	46.07	60.61	6.22635e+06	1.22322e+07	9.71974e+06	7.92858e+07	4.48055e+07	7.47322e+07	1.46914e+06	3.60656e+06	4.14838e+06	5.58949e+07	1.48911e+07	6.90599e+07	High	High	High	High	High	High	High
FALSE	High	Master Protein	Glyma.16G177800.1.p	PF11947 - Protein of unknown function (DUF3464) (DUF3464) (1 of 3)	0	13.166	17	2	10	2	2	183	20.4	7.05	20.71	2	0.428	0.044	0.01	1	0.04521	NA	116.3	271.9	11.9	NA	28.81	21.17	90.52	NA	6.60344e+07	3.73744e+07	4.77102e+07	1.12346e+08	1.11525e+08	7.53617e+07	1.09739e+06	1.15037e+07	4.86227e+06	NA	NA	NA	High	High	High	High	High	Not Found	High
FALSE	High	Master Protein	Glyma.08G317200.1.p	PF04520 - Senescence regulator (Senescence_reg) (1 of 30)	0	8.77	11	2	6	1	2	212	23.8	5.5	11.85	2	0.099	0.039	0.332	0.419654	0.0445257	0.714052	26.9	272	10.6	90.4	122.87	9.64	67.73	8.23	1.53731e+07	1.52316e+06	2.18053e+06	2.204e+07	2.13015e+07	2.54471e+07	788399	860326	2.41036e+06	8.2856e+06	7.32645e+06	7.11587e+06	High	High	Peak Found	High	High	Not Found	Peak Found
[truncated: 7 more columns]

## Sheet: DEPs 2h
Checked	Protein FDR Confidence: Combined	Master	Accession	Description	Exp. q-value: Combined	Sum PEP Score	Coverage [%]	# Peptides	# PSMs	# Protein Unique Peptides	# Unique Peptides	# AAs	MW [kDa]	calc. pI	Score Sequest HT: Sequest HT	# Peptides (by Search Engine): Sequest HT	Abundance Ratio: (0_5h) / (0h)	Abundance Ratio: (1h) / (0h)	Abundance Ratio: (2h) / (0h)	Abundance Ratio Adj. P-Value: (0_5h) / (0h)	Abundance Ratio Adj. P-Value: (1h) / (0h)	Abundance Ratio Adj. P-Value: (2h) / (0h)	Abundances (Grouped): 0_5h	Abundances (Grouped): 0h	Abundances (Grouped): 1h	Abundances (Grouped): 2h	Abundances (Grouped) CV [%]: 0_5h	Abundances (Grouped) CV [%]: 0h	Abundances (Grouped) CV [%]: 1h	Abundances (Grouped) CV [%]: 2h	Abundances (Normalized): F1: Sample, 0_5h	Abundances (Normalized): F2: Sample, 0_5h	Abundances (Normalized): F8: Sample, 0_5h	Abundances (Normalized): F3: Sample, 0h	Abundances (Normalized): F4: Sample, 0h	Abundances (Normalized): F7: Sample, 0h	Abundances (Normalized): F5: Sample, 1h	Abundances (Normalized): F6: Sample, 1h	Abundances (Normalized): F9: Sample, 1h	Abundances (Normalized): F10: Sample, 2h	Abundances (Normalized): F11: Sample, 2h	Abundances (Normalized): F12: Sample, 2h	Found in Sample: [S1] F1: Sample, 0_5h	Found in Sample: [S2] F2: Sample, 0_5h	Found in Sample: [S8] F8: Sample, 0_5h	Found in Sample: [S3] F3: Sample, 0h	Found in Sample: [S4] F4: Sample, 0h	Found in Sample: [S7] F7: Sample, 0h	Found in Sample: [S5] F5: Sample, 1h
FALSE	High	Master Protein	Glyma.15G065800.1.p	K09602 - ubiquitin thioesterase protein OTUB1 [EC:3.4.19.12] (OTUB1) (1 of 2)	0	17.183	14	4	17	0	4	301	34	4.79	36.33	4	1.234	1.8	22.726	1	0.936486	0.00335469	18.4	14.9	26.9	339.7	45.24	52.01	28.63	28.5	2.15715e+07	17391078	3.97095e+07	1.24919e+07	1.74806e+07	3.35714e+07	3.14573e+07	2.69116e+07	4.59778e+07	2.48236e+08	3.97271e+08	4.48211e+08	Peak Found	High	High	High	Peak Found	Peak Found	High
FALSE	High	Master Protein	Glyma.14G038300.1.p	PTHR11413//PTHR11413:SF57 - CYSTATIN FAMILY MEMBER // SUBFAMILY NOT NAMED (1 of 2)	0	32.605	41	7	27	2	7	200	22.5	5.3	72.08	7	11.314	1.338	18.184	0.0014569	0.897759	0.00039366	142.2	12.6	16.8	228.5	6.56	32.84	35.84	12.35	2.07124e+08	182086563	1.90967e+08	1.44712e+07	1.68793e+07	2.64285e+07	2.11708e+07	2.25915e+07	3.89527e+07	2.79165e+08	3.06925e+08	3.55775e+08	High	High	High	High	High	High	High
FALSE	High	Master Protein	Glyma.11G226400.1.p	PTHR24206:SF28 - ACTIN BUNDLER LIM FAMILY PROTEIN WLIM2B (1 of 4)	0	9.481	14	2	2	0	2	200	21.7	8.84	5.88	2	1.298	0.54	17.315	1	1	0.0223281	25.8	19.8	10.7	343.7	14.09	37.35	60.43	94.65	1.91689e+07	1.99853e+07	1.52115e+07	1.47725e+07	2.28574e+07	1.10066e+07	4.53163e+06	15595309	7.97739e+06	1.27673e+08	2.5579e+08	8.64725e+08	Peak Found	Peak Found	Peak Found	Peak Found	Peak Found	High	Peak Found
FALSE	High	Master Protein	Glyma.17G008500.1.p	NA	0	47.614	41	4	11	3	3	118	13.1	3.95	38.54	4	100	42.351	17.11	0.00662436	0.00991185	0.0338679	254.7	2.4	101.8	41.1	7.39	81.69	11.92	41.3	6.6172e+07	6.44172e+07	5.74232e+07	87023.9	1.01756e+06	608089	2.57533e+07	2.33407e+07	2.95405e+07	4.86852e+06	1.20464e+07	1.04045e+07	Not Found	Not Found	High	Peak Found	Peak Found	Peak Found	Peak Found
FALSE	High	Master Protein	Glyma.18G039500.1.p	PTHR10891:SF573 - CALCIUM-BINDING PROTEIN CML24-RELATED (1 of 10)	0	16.732	27	3	7	0	3	139	15.6	5.1	18.04	3	8.869	10.375	15.008	0.14413	0.10139	0.0336684	100.6	11.3	117.7	170.3	67.51	15.53	63.48	13.36	3.82238e+06	1.51096e+06	7.06469e+06	430989	388406	524417	4.47142e+06	1.2865e+06	6.35986e+06	5.12009e+06	6.46849e+06	6.56716e+06	Peak Found	Peak Found	High	Peak Found	Peak Found	Not Found	Not Found
FALSE	High	Master Protein	Glyma.13G176300.1.p	PTHR11527:SF158 - 17.6 KDA CLASS I HEAT SHOCK PROTEIN 1-RELATED (1 of 20)	0	43.19	40	6	24	0	4	161	18.5	8.34	64.36	6	2.628	10.091	14.978	0.848481	0.0115579	0.00349374	36.6	13.9	140.7	208.8	25.08	59.4	10.33	35.93	3.43363e+07	2.04518e+07	2.9015e+07	9.40467e+06	1.10406e+07	2.6132e+07	1.231e+08	1.11407e+08	1.00068e+08	1.6537e+08	144839976	2.75237e+08	Peak Found	Peak Found	High	Peak Found	Peak Found	Peak Found	High
FALSE	High	Master Protein	Glyma.07G214700.1.p	PTHR10509//PTHR10509:SF23 - O-METHYLTRANSFERASE-RELATED // SUBFAMILY NOT NAMED (1 of 5)	0	69.897	55	9	42	2	2	247	28.1	5.68	110.55	9	4.27	2.126	14.628	0.371395	1	0.0221083	77.5	18.2	38.6	265.7	49.99	27.13	77.54	45.77	2.93985e+06	3.92274e+06	7.48332e+06	1.25857e+06	739166	918775	723119	1.95368e+06	4.25076e+06	2.4831e+07	1.34402e+07	1.07419e+07	Peak Found	High	High	High	High	Not Found	Peak Found
FALSE	High	Master Protein	Glyma.20G158500.1.p	PTHR33836:SF1 - ARM REPEAT SUPERFAMILY PROTEIN-RELATED (1 of 4)	0	79.178	38	12	21	9	12	538	58.4	4.93	63.83	12	1.658	0.695	13.903	1	1	0.00184115	38.4	23.2	16.1	322.3	8.91	37.82	48.78	8.22	1.04588e+07	9.5986e+06	1.14682e+07	6.30768e+06	5.47009e+06	1.07558e+07	3.66192e+06	4.38126e+06	8.69413e+06	9.25408e+07	8.76959e+07	7.85747e+07	Peak Found	Not Found	Peak Found	Peak Found	Peak Found	Peak Found	Peak Found
FALSE	High	Master Protein	Glyma.09G185500.1.p	PF00257 - Dehydrin (Dehydrin) (1 of 7)	0	113.7	54	8	21	8	8	253	26.6	6.8	95.42	8	0.754	1.646	13.381	1	0.687813	0.00186443	18	23.8	39.2	319	17.07	46.98	23.3	21.8	1.63064e+07	1.74889e+07	1.24571e+07	1.54683e+07	2.16273e+07	3.82882e+07	3.56044e+07	3.35144e+07	5.05564e+07	2.89405e+08	2.0581e+08	3.20407e+08	Peak Found	Peak Found	Peak Found	Peak Found	Peak Found	Peak Found	Peak Found
FALSE	High	Master Protein	Glyma.17G201900.1.p	PTHR33638:SF1 - SELENOPROTEIN H (1 of 2)	0	43.025	55	7	21	6	6	173	19	9.48	55.23	7	7.796	2.312	13.044	0.0595739	0.539536	0.0129145	129.1	16.6	38.3	216	15.68	58	61.31	38.33	8.89061e+06	1.21599e+07	1.03108e+07	554434	1.3225e+06	2.08721e+06	1.7062e+06	3.05811e+06	6.01301e+06	1.36397e+07	1.72507e+07	2.81238e+07	High	Peak Found	High	Peak Found	Peak Found	High	High
FALSE	High	Master Protein	Glyma.09G190000.1.p	NA	0	14.908	44	3	16	2	2	82	8.4	9.76	35.3	3	1.553	1.491	11.101	1	1	0.0399987	41	26.4	39.4	293.2	46.06	18.81	14.08	57.78	3.40007e+06	2.06147e+06	5.36677e+06	1.87316e+06	2.71468e+06	2.19004e+06	2.61583e+06	3.4494e+06	3.26548e+06	2.85487e+07	6.8521e+06	2.43122e+07	Not Found	High	High	Peak Found	High	High	High
FALSE	High	Master Protein	Glyma.14G199000.1.p	PTHR10555//PTHR10555:SF155 - SORTING NEXIN // SUBFAMILY NOT NAMED (1 of 4)	0	14.882	10	5	7	0	5	561	62.3	5.5	5.62	5	2.739	2.176	9.608	0.157254	0.192718	0.00716317	70.6	25.8	56.1	247.6	9.62	48.79	35.63	32.74	1.78155e+07	1.52772e+07	1.5028e+07	5.57712e+06	1.99379e+06	6.03416e+06	9.5663e+06	1.21346e+07	1.88997e+07	5.35873e+07	3.26529e+07	6.52952e+07	Peak Found	High	High	High	High	Peak Found	Peak Found
FALSE	High	Master Protein	Glyma.16G182200.1.p	NA	0	77.166	19	15	39	0	6	975	106.7	4.79	88.43	15	4.065	9.656	9.481	0.0568185	0.00454978	0.00416174	67.2	16.5	159.6	156.7	17.6	12.08	46.74	28.64	4.37602e+06	3.22909e+06	4.53434e+06	871656	1.08992e+06	1.07653e+06	1.62673e+07	6.1e+06	1.03945e+07	1.11786e+07	6.20831e+06	1.02066e+07	High	High	High	Peak Found	High	Not Found	Not Found
FALSE	High	Master Protein	Glyma.03G176200.1.p	K18732 - SAP domain-containing ribonucleoprotein (SARNP, CIP29, THO1) (1 of 2)	0	52.631	44	6	26	5	5	189	20.2	6.93	73.83	6	4.517	4.783	9.015	0.110796	0.0728412	0.0312474	93.5	20.7	99.1	186.7	11.12	3	1.94	61.74	2.60819e+07	2.65716e+07	3.17277e+07	5.88309e+06	6.08673e+06	5.73361e+06	2.83636e+07	2.81408e+07	2.73325e+07	1.5384e+07	5.30366e+07	7.23478e+07	Peak Found	High	High	High	High	High	High
FALSE	High	Master Protein	Glyma.04G198900.1.p	K17780 - mitochondrial import inner membrane translocase subunit TIM8 (TIM8) (1 of 2)	0	13.765	35	3	10	0	3	78	9	5.33	17.21	3	12.824	4.719	8.764	0.000180856	0.000679396	0.00012473	187.9	14.6	69.1	128.4	0.99	3.76	27.89	10.24	8.46517e+07	8.4963e+07	8.33881e+07	6.60092e+06	6.80074e+06	6.30936e+06	4.49715e+07	2.66396e+07	3.1147e+07	6.15862e+07	5.78477e+07	5.02197e+07	Peak Found	Peak Found	High	Peak Found	Peak Found	Peak Found	Not Found
FALSE	High	Master Protein	Glyma.01G116000.6.p	K10802 - high mobility group protein B1 (HMGB1) (1 of 2)	0	46.591	19	5	26	0	5	169	18.9	5.94	98.52	5	9.079	4.282	8.715	0.02675	0.073955	0.0133849	157.4	17.3	74.2	151.1	12.99	58.6	42.94	28.85	9.35729e+07	7.2295e+07	8.76456e+07	1.33756e+07	9.65343e+06	3.23473e+06	4.1337e+07	2.67211e+07	6.43074e+07	7.4639e+07	8.41281e+07	1.26125e+08	High	High	High	High	High	Peak Found	High
FALSE	High	Master Protein	Glyma.13G062700.1.p	K00703 - starch synthase (E2.4.1.21, glgA) (1 of 4)	0	54.786	18	10	37	4	4	776	86.5	5.9	101.11	10	12.118	35.816	8.507	0.023065	0.00410763	0.0260512	84.4	7	249.4	59.2	48.48	53.56	33.9	17.36	6.24449e+07	3.30952e+07	9.44888e+07	5.1531e+06	3.28701e+06	9.53984e+06	1.87574e+08	9.47392e+07	1.84565e+08	5.01816e+07	4.38389e+07	3.52697e+07	High	High	High	High	High	Peak Found	High
FALSE	High	Master Protein	Glyma.09G230800.1.p	K13095 - splicing factor 1 (SF1) (1 of 4)	0	11.993	6	3	3	0	3	780	83.8	6.15	4.8	3	12.631	8.001	8.443	0.0116191	0.0248834	0.0120769	168	13.3	106.4	112.3	21.71	29.79	57.5	13.57	1.45328e+07	2.20658e+07	1.68046e+07	1.78851e+06	977237	1.33037e+06	1.62079e+07	4.28255e+06	1.06444e+07	1.40682e+07	1.11886e+07	1.12322e+07	Not Found	Not Found	Peak Found	Peak Found	Peak Found	High	Not Found
FALSE	High	Master Protein	Glyma.08G196300.1.p	PTHR12292 - RWD DOMAIN-CONTAINING PROTEIN (1 of 2)	0	24.361	25	5	16	4	4	253	28.4	4.28	22.34	5	9.372	1.88	8.056	0.00446605	0.53637	0.00390161	184.6	19.7	37	158.7	39.09	37.26	3.58	21.28	2.85798e+07	2.37592e+07	4.85535e+07	3.04957e+06	2.31264e+06	4.76362e+06	5.73358e+06	5.47029e+06	5.8711e+06	1.96609e+07	3.02149e+07	2.4567e+07	High	High	High	Peak Found	High	Peak Found	High
FALSE	High	Master Protein	Glyma.10G058100.1.p	1.1.1.41 - Isocitrate dehydrogenase (NAD(+)) / Nicotinamide adenine dinucleotide isocitrate dehydrogenase (1 of 6)	0	123.897	42	13	87	1	3	359	39.4	7.49	261.56	13	23.141	15.208	7.861	0.00096361	0.00135581	0.00356161	196.1	8.5	128.9	66.6	22.18	35.3	14.02	30.95	2.01492e+07	2.19092e+07	1.40116e+07	736262	870728	1.40659e+06	1.46957e+07	1.10739e+07	1.32423e+07	5.05035e+06	6.84483e+06	9.42609e+06	High	High	Peak Found	High	High	Peak Found	High
FALSE	High	Master Protein	Glyma.05G007200.1.p	PTHR22939:SF81 - PROTEASE DO-LIKE 1, CHLOROPLASTIC (1 of 2)	0	162.349	43	15	154	1	2	426	45.2	6.81	508.89	15	0.381	0.551	7.605	0.178675	0.474326	0.0034113	16	41.9	23.1	319	47.3	12.4	15.35	24.81	2.5346e+06	6.0597e+06	3.23787e+06	8.45919e+06	1.04411e+07	8.49998e+06	4.65836e+06	4.6832e+06	6.03291e+06	6.46409e+07	8.88643e+07	5.54131e+07	High	High	Not Found	High	High	Peak Found	High
FALSE	High	Master Protein	Glyma.03G222200.1.p	PF06108 - Protein of unknown function (DUF952) (DUF952) (1 of 2)	0	9.369	19	2	9	1	2	120	13.4	5.1	17.44	2	4.47	6.788	7.374	0.24405	0.0363895	0.0200581	91.1	20.4	138.3	150.2	35.47	53.88	24.87	8.42	3.09788e+06	6.02873e+06	6.51845e+06	1.34863e+06	1.19173e+06	2.98296e+06	5.95283e+06	9.81534e+06	9.15412e+06	1.0712e+07	9.04706e+06	9.94443e+06	High	High	High	High	High	Peak Found	High
FALSE	High	Master Protein	Glyma.20G009200.1.p	NA	0	14.846	9	4	7	0	4	511	55.1	4.91	15.78	4	6.567	8.4	7.186	0.000800998	0.000388638	0.000275672	113.5	17.3	145.1	124.1	24.33	7.58	11.78	17.46	1.51299e+07	1.26685e+07	2.0311e+07	2.06248e+06	2.30383e+06	2.39239e+06	1.58389e+07	1.93533e+07	1.97632e+07	1.65565e+07	2.1132e+07	1.52676e+07	Peak Found	Peak Found	High	High	Not Found	Peak Found	Peak Found
FALSE	High	Master Protein	Glyma.10G123200.1.p	K11092 - U2 small nuclear ribonucleoprotein A' (SNRPA1) (1 of 2)	0	54.976	42	9	41	0	9	287	32.7	5.58	120.69	9	3.149	6.062	6.969	0.106674	0.0136044	0.0101355	73.3	23.3	141.1	162.3	37.33	43.74	33.58	14.79	4.85064e+07	6.28336e+07	9.93548e+07	1.99528e+07	2.56094e+07	9.71106e+06	1.20956e+08	9.58967e+07	1.82819e+08	139059529	1.17487e+08	1.58378e+08	High	High	High	High	High	Peak Found	High
FALSE	High	Master Protein	Glyma.19G124500.1.p	PF02018//PF06964 - Carbohydrate binding domain (CBM_4_9) // Alpha-L-arabinofuranosidase C-terminus (Alpha-L-AF_C) (1 of 1)	0	98.295	23	11	76	3	3	676	74	5.44	231.06	11	1.117	0.977	6.904	1	1	0.0229918	44.7	40	39.1	276.2	46.52	39.25	18.99	40.44	7.59929e+06	8.84224e+06	1.71896e+07	7.34326e+06	7.915e+06	1.43118e+07	7.73233e+06	6.24066e+06	9.17006e+06	8.3592e+07	5.46482e+07	3.68288e+07	High	High	High	High	High	High	High
FALSE	High	Master Protein	Glyma.10G023800.1.p	PTHR16019:SF7 - BSD DOMAIN-CONTAINING PROTEIN (1 of 4)	0	23.694	20	9	17	2	9	464	51.1	4.55	25.16	9	1.688	1.643	6.708	0.910395	0.842138	0.021802	61.2	36.2	59.5	243.1	7.97	12.69	21.93	48.21	3.54222e+07	3.35542e+07	3.91921e+07	2.09907e+07	2.10017e+07	1.66965e+07	3.44818e+07	2.5444e+07	3.98825e+07	5.02677e+07	148148853	1.40804e+08	Peak Found	Peak Found	High	Peak Found	Peak Found	High	Not Found
FALSE	High	Master Protein	Glyma.15G265300.1.p	K09291 - nucleoprotein TPR (TPR, MLP1, MLP2) (1 of 2)	0	24.693	4	6	11	0	6	2084	234.2	5.06	22.3	6	12.825	4.97	6.602	0.0209022	0.0728412	0.0459243	202	15.7	78.3	104	21.89	63	42.48	17.16	2.11212e+07	1.4637e+07	2.26748e+07	1.64686e+06	1.52152e+06	4.2977e+06	8.18435e+06	6.69582e+06	1.45405e+07	8.77014e+06	1.08728e+07	1.24242e+07	High	High	High	Peak Found	Peak Found	Peak Found	Peak Found
FALSE	High	Master Protein	Glyma.19G011400.1.p	PTHR11527//PTHR11527:SF170 - SMALL HEAT-SHOCK PROTEIN HSP20 FAMILY // SUBFAMILY NOT NAMED (1 of 2)	0	41.804	36	6	16	5	6	197	22.3	6.11	32.74	6	1.797	2.585	6.239	1	0.319524	0.0333402	61.9	34.4	89	214.7	58.95	5.26	28.45	48.26	1.97923e+07	7.37688e+06	2.96611e+07	1.02456e+07	1.13639e+07	1.10115e+07	2.8466e+07	2.79119e+07	4.48009e+07	5.66768e+07	6.87034e+07	1.34298e+08	Peak Found	Peak Found	Peak Found	Peak Found	Peak Found	Peak Found	Peak Found
FALSE	High	Master Protein	Glyma.07G125900.1.p	PTHR31284:SF7 - ACID PHOSPHATASE-RELATED (1 of 8)	0	22.091	21	5	18	4	5	253	28.4	4.86	35.99	5	2.34	3.284	6.157	0.528513	0.0675372	0.0178326	73.2	31.3	102.8	192.7	15.55	4.22	33.12	46.55	2.19836e+07	2.87587e+07	2.95608e+07	1.29174e+07	1.1882e+07	1.2289e+07	3.20976e+07	4.03595e+07	6.06511e+07	7.56627e+07	3.61484e+07	1.02098e+08	High	High	High	High	High	Peak Found	High
FALSE	High	Master Protein	Glyma.08G142800.1.p	PF15704 - Mitochondrial ATP synthase subunit (Mt_ATP_synt) (1 of 3)	0	324.333	70	26	353	1	2	241	27.5	6.84	1034.79	26	1.951	1.802	6.149	0.667755	0.836891	0.0109168	71.6	36.7	66.1	225.6	24.44	45.97	20.18	23.41	9.86478e+06	9.60995e+06	1.45312e+07	5.05742e+06	4.35062e+06	9.75265e+06	7.82083e+06	9.11367e+06	1.1597e+07	2.47672e+07	3.1098e+07	3.96185e+07	High	High	High	High	High	High	Not Found
FALSE	High	Master Protein	Glyma.17G088900.1.p	PTHR10093 - IRON-SULFUR CLUSTER ASSEMBLY ENZYME NIFU HOMOLOG (1 of 4)	0	18.936	20	3	14	0	1	165	17.8	8.81	30.69	3	2.959	3.114	6.025	0.235645	0.0951506	0.0374418	90.4	30.5	95.1	184	14.52	3.34	34.7	56.05	5.31227e+06	4.23589e+06	4.10888e+06	1.352e+06	1.43155e+06	1.43527e+06	7.75452e+06	4.45746e+06	4.39699e+06	3.46318e+06	8.62459e+06	1.27072e+07	Not Found	Not Found	High	Not Found	Not Found	Peak Found	Not Found
FALSE	High	Master Protein	Glyma.08G108300.1.p	K13110 - microfibrillar-associated protein 1 (MFAP1) (1 of 2)	0	13.27	8	3	7	0	3	440	52.2	4.98	14.16	3	1.399	2.72	5.524	1	0.0268962	0.00254552	52.6	37.6	102.2	207.6	13.16	25.57	12.05	24.07	7.06047e+06	5.60475e+06	5.73003e+06	3.5095e+06	4.09642e+06	5.70093e+06	1.28777e+07	1.0166e+07	1.1143e+07	1.54606e+07	2.26307e+07	2.52916e+07	Not Found	Not Found	Peak Found	Not Found	Not Found	High	Not Found
FALSE	High	Master Protein	Glyma.20G025000.1.p	NA	0	13.282	18	3	12	1	3	230	25.6	9.83	23.45	3	4.071	1.688	5.204	0.277322	1	0.0495948	136.1	33.4	56.4	174	50.15	30.57	10.38	20.62	3.61427e+06	8.85905e+06	1.14765e+07	3.47537e+06	2.05993e+06	2.17613e+06	3.41792e+06	4.18389e+06	3.6728e+06	8.22118e+06	1.13244e+07	1.2477e+07	High	High	High	High	High	High	Peak Found
FALSE	High	Master Protein	Glyma.19G195100.1.p	K11099 - small nuclear ribonucleoprotein G (SNRPG, SMG) (1 of 3)	0	28.853	51	5	40	2	2	79	8.8	9.25	115.51	5	3.454	1.314	4.948	0.0495747	0.977421	0.0169954	128.9	37.3	49	184.7	15.18	2.23	27.61	43.44	2.66533e+07	3.49153e+07	2.76314e+07	8.28784e+06	8.00046e+06	7.95502e+06	1.00659e+07	1.05089e+07	1.61244e+07	2.10938e+07	5.43263e+07	3.95878e+07	High	High	Peak Found	High	High	High	High
FALSE	High	Master Protein	Glyma.10G222100.1.p	NA	0	59.983	38	7	68	3	3	216	23.5	9.55	196.27	7	2.878	1.751	4.874	0.109548	0.346451	0.022978	109.6	38.1	66.7	185.6	47.05	13.54	47.35	10	5.02892e+07	4.19933e+07	9.70822e+07	1.74736e+07	1.52526e+07	2.00104e+07	2.85586e+07	3.06004e+07	6.29051e+07	7.53918e+07	8.51606e+07	9.21652e+07	High	High	High	High	High	High	High
FALSE	High	Master Protein	Glyma.08G335300.1.p	K11338 - RuvB-like protein 2 [EC:3.6.4.12] (RUVBL2, RVB2, INO80J) (1 of 2)	0	27.906	19	7	10	2	7	465	51	5.47	15.47	7	5.504	6.442	4.813	0.00137388	0.000813054	0.00115626	124	22.5	145.1	108.4	15.28	17.69	13.14	22.1	1.62667e+07	1.32674e+07	1.80683e+07	2.95533e+06	3.03457e+06	2.16482e+06	1.51546e+07	1.90382e+07	1.9377e+07	1.15012e+07	1.42226e+07	1.79048e+07	High	Peak Found	High	High	Not Found	Not Found	High
FALSE	High	Master Protein	Glyma.07G252100.1.p	PTHR10799//PTHR10799:SF783 - SWI/SNF-RELATED MATRIX-ASSOCIATED ACTIN-DEPENDENT REGULATOR OF CHROMATIN SUBFAMILY-RELATED // SUBFAMILY NOT NAMED (1 of 4)	0	10.636	2	3	7	2	3	3789	410.5	5.29	13.46	3	1.551	1.275	4.543	1	0.836036	0.0462182	74.1	47.8	60.9	217.1	36.17	33.45	62.07	28.96	2.50534e+07	1.62603e+07	1.24157e+07	1.04839e+07	1.29388e+07	6.36628e+06	1.33644e+07	12522666	3.46143e+07	6.83575e+07	4.76274e+07	3.92463e+07	Peak Found	Peak Found	High	Peak Found	Peak Found	High	Peak Found
FALSE	High	Master Protein	Glyma.15G113900.1.p	NA	0	9.416	17	3	4	1	3	201	22.1	5.34	8.64	3	0.674	1.872	4.444	1	0.848828	0.0239196	33.7	50.1	93.7	222.5	26.84	46.29	24.71	2.89	2.36864e+06	2.52655e+06	3.78566e+06	3.75076e+06	2.86317e+06	6.81222e+06	8.1083e+06	4.87103e+06	7.02067e+06	1.73292e+07	1.63832e+07	1.66679e+07	Peak Found	Not Found	High	Not Found	Peak Found	Peak Found	Not Found
FALSE	High	Master Protein	Glyma.08G138200.2.p	5.5.1.4 - Inositol-3-phosphate synthase / Myo-inositol-1-phosphate synthase (1 of 4)	0	186.056	38	18	132	0	2	510	56.4	5.55	354.99	18	3.102	2.378	4.431	0.0976727	0.33136	0.0270198	113.7	36.7	87.2	162.4	2.48	27.52	36.63	38.24	2.09213e+07	2.03124e+07	1.99193e+07	6.54784e+06	3.90097e+06	6.69754e+06	7.73175e+06	1.66966e+07	1.55703e+07	2.9011e+07	3.87724e+07	1.71532e+07	High	High	High	High	Peak Found	Peak Found	Peak Found
FALSE	High	Master Protein	Glyma.19G174700.1.p	PF07719//PF13174 - Tetratricopeptide repeat (TPR_2) // Tetratricopeptide repeat (TPR_6) (1 of 1)	0	48.813	30	11	30	7	8	351	39.9	6.48	60.99	11	4.186	6.627	4.394	0.00253573	0.000477625	0.0014767	103.3	24.7	163.5	108.5	10.56	10.79	18.05	22.48	2.21825e+07	2.12125e+07	2.5834e+07	5.29862e+06	6.16211e+06	5.02613e+06	3.51114e+07	3.25821e+07	4.54275e+07	1.80326e+07	2.84962e+07	2.32835e+07	High	High	High	Peak Found	High	Not Found	High
FALSE	High	Master Protein	Glyma.03G160000.2.p	PTHR10288//PTHR10288:SF155 - KH DOMAIN CONTAINING RNA BINDING PROTEIN // SUBFAMILY NOT NAMED (1 of 6)	0	52.696	19	8	39	0	2	529	56.4	5.26	106.92	8	2.422	0.893	4.268	0.0793071	1	0.00410497	112.9	46.6	41.6	198.9	6.61	10.92	34.48	13.01	3.82625e+06	3.36754e+06	3.72313e+06	1.49854e+06	1.53751e+06	1.82262e+06	1.37321e+06	1.94034e+06	961640	6.56147e+06	5.6811e+06	7.38255e+06	Not Found	High	Peak Found	High	High	High	Peak Found
FALSE	High	Master Protein	Glyma.09G125800.1.p	PF11341 - Protein of unknown function (DUF3143) (DUF3143) (1 of 2)	0	22.019	31	4	30	2	4	168	18.9	6.09	59.36	4	1.369	5.465	4.252	1	0.0222223	0.0216856	45.3	33.1	180.9	140.7	25.47	25.87	38.27	18.73	8.79947e+06	1.21376e+07	1.4869e+07	7.95786e+06	8.86634e+06	1.27601e+07	4.84536e+07	26299066	6.01999e+07	3.76989e+07	3.71271e+07	5.10148e+07	High	High	High	High	High	High	High
FALSE	High	Master Protein	Glyma.08G025700.1.p	K09490 - heat shock 70kDa protein 5 (HSPA5, BIP) (1 of 4)	0	251.334	44	29	255	3	3	667	73.4	5.19	748.52	29	2.25	0.972	4.234	0.0685167	1	0.00554849	106.4	47.3	46	200.3	16.58	28.78	24.66	26.31	1.83826e+07	1.41285e+07	1.37929e+07	6.46403e+06	3.65215e+06	6.28071e+06	6.09571e+06	9137735	6.10334e+06	2.65943e+07	2.16341e+07	3.61978e+07	High	High	High	Not Found	High	High	Peak Found
FALSE	High	Master Protein	Glyma.09G248300.1.p	PTHR11075:SF46 - PROTEIN HIGH CHLOROPHYLL FLUORESCENT 109 (1 of 1)	0	6.471	7	3	10	3	3	456	51	5.53	0	3	2.292	4.967	4.176	0.0916035	0.00975021	0.00861284	73.7	32.2	159.8	134.3	24.11	6.46	31.49	18.64	1.75465e+07	1.16771e+07	1.19606e+07	5.12873e+06	5.76978e+06	5.21768e+06	2.84869e+07	1.48159e+07	2.59146e+07	1.78406e+07	2.17867e+07	2.59938e+07	Peak Found	High	Peak Found	High	High	Peak Found	Peak Found
FALSE	High	Master Protein	Glyma.11G244700.1.p	K09497 - T-complex protein 1 subunit epsilon (CCT5) (1 of 2)	0	29.583	13	5	30	0	5	535	59.2	5.85	68.73	5	3.647	2.415	4.16	0.00205628	0.00608646	0.000620697	130	35.6	86.1	148.3	17.21	9.24	17.65	2.65	5.02947e+07	5.52153e+07	3.90364e+07	1.37916e+07	1.55654e+07	1.30184e+07	3.02539e+07	4.22305e+07	3.33048e+07	5.88318e+07	5.73777e+07	5.57887e+07	High	High	High	High	High	Peak Found	High
FALSE	High	Master Protein	Glyma.10G128100.1.p	K11353 - NADH dehydrogenase (ubiquinone) 1 alpha subcomplex subunit 13 (NDUFA13) (1 of 1)	0	33.403	34	4	23	0	4	143	16.2	9.52	61.64	4	1.11	1.124	4.012	1	1	0.0370071	61.3	55.2	62	221.5	24.4	28.76	34.24	32.7	1.41742e+07	1.63376e+07	2.24806e+07	1.48875e+07	1.47248e+07	8.48164e+06	1.38875e+07	1.65466e+07	2.61654e+07	3.20036e+07	5.90745e+07	6.26527e+07	High	High	High	High	High	Peak Found	High
FALSE	High	Master Protein	Glyma.13G119900.1.p	PTHR21230//PTHR21230:SF35 - VESICLE TRANSPORT V-SNARE PROTEIN VTI1-RELATED // SUBFAMILY NOT NAMED (1 of 2)	0	18.426	12	3	19	0	3	269	30.3	6.58	42.27	3	6.441	4.415	4.007	0.00114245	0.00242438	0.00132901	162.4	25.2	111.3	101	12.18	2.57	14.7	29.89	3.37309e+07	4.13505e+07	4.25318e+07	6.21991e+06	6.42023e+06	6.54579e+06	2.83471e+07	2.44616e+07	3.28454e+07	2.5557e+07	4.16827e+07	2.57281e+07	High	Peak Found	High	Peak Found	High	Peak Found	High
FALSE	High	Master Protein	Glyma.14G014800.5.p	K02739 - 20S proteasome subunit beta 2 (PSMB7) (1 of 2)	0	12.024	11	4	12	3	4	271	29.3	7.25	26.48	4	4.651	2.763	3.962	0.00820695	0.0266626	0.00462138	150.3	32.3	89.3	128.1	1.72	12.77	15.36	42.42	4.15382e+07	4.08093e+07	4.22357e+07	7.2063e+06	9.18846e+06	8.93137e+06	2.17405e+07	2.46745e+07	2.9434e+07	3.53825e+07	6.17354e+07	2.80787e+07	High	Peak Found	High	High	Peak Found	Peak Found	High
FALSE	High	Master Protein	Glyma.08G185800.1.p	PF04755 - PAP_fibrillin (PAP_fibrillin) (1 of 23)	0	135.029	58	15	134	0	3	242	27.2	9.42	438.7	15	3.087	1.852	3.88	0.212699	1	0.0300777	125.8	40.7	75.4	158.1	38	7.58	34.33	13.58	9.59188e+06	1.77888e+07	2.18213e+07	6.50039e+06	5.76268e+06	5.67465e+06	5.42923e+06	1.06707e+07	1.08741e+07	2.18771e+07	2.23615e+07	2.77472e+07	High	High	High	High	High	Peak Found	High
FALSE	High	Master Protein	Glyma.13G088000.1.p	PTHR30620:SF8 - BETA-D-XYLOSIDASE 7-RELATED (1 of 3)	0	11.017	4	3	7	0	3	778	85.5	7.72	16.37	3	0.964	1.833	3.758	1	0.44808	0.022238	51	52.9	97.1	199	30.85	25.3	34.38	24.37	1.13165e+06	2.10943e+06	2.02334e+06	2.18162e+06	2.09938e+06	1.32465e+06	3.84854e+06	2.41986e+06	4.99685e+06	1.0934e+07	6.92649e+06	7.88878e+06	Peak Found	High	Not Found	High	High	Peak Found	High
FALSE	High	Master Protein	Glyma.13G003700.1.p	K09486 - hypoxia up-regulated 1 (HYOU1) (1 of 2)	0	27.244	8	7	20	2	7	891	99	5.45	33.04	7	2.781	4.89	3.754	0.163874	0.0230893	0.0315353	89.5	32.2	157.4	120.8	37.99	29.51	28.74	12.61	1.57021e+07	2.26867e+07	3.3838e+07	6.48676e+06	8.15686e+06	1.15431e+07	2.58815e+07	3.98898e+07	4.71713e+07	3.06219e+07	3.70019e+07	2.94109e+07	High	High	High	High	High	Peak Found	High
FALSE	High	Master Protein	Glyma.02G285800.1.p	NA	0	4.991	9	3	3	1	3	293	33.1	5.11	4.87	3	1.69	2.547	3.7	0.750393	0.0702917	0.0174502	75.6	44.8	114	165.6	15.49	38.8	15.89	17.96	1.03244e+07	8.73983e+06	7.58287e+06	5.17197e+06	8.08261e+06	3.76683e+06	1.58493e+07	1.15946e+07	1.31737e+07	1.91366e+07	1.53967e+07	2.21727e+07	Peak Found	Not Found	High	Peak Found	Peak Found	Peak Found	Peak Found
FALSE	High	Master Protein	Glyma.10G154300.1.p	PF09353 - Domain of unknown function (DUF1995) (DUF1995) (1 of 11)	0	33.526	28	8	24	2	8	344	38.7	4.91	48.81	8	4.955	5.379	3.671	0.0100622	0.00432356	0.00812482	132.1	26.7	143.4	97.9	18.3	25.45	16.88	21.76	3.69767e+07	2.64942e+07	3.72969e+07	7.46253e+06	1.06952e+07	6.72612e+06	4.01443e+07	3.25867e+07	4.58959e+07	2.73939e+07	3.60563e+07	2.37436e+07	High	High	High	High	Peak Found	Not Found	High
FALSE	High	Master Protein	Glyma.10G155000.1.p	K01875 - seryl-tRNA synthetase (SARS, serS) (1 of 3)	0	113.517	41	16	93	4	4	447	51.3	6.43	198.13	16	2.862	2.259	3.634	0.00316144	0.00658842	0.000577221	117.3	41	92.6	149	14.88	14.42	10.41	9.88	1.55298e+07	1.31216e+07	1.15694e+07	4.5849e+06	3.90356e+06	5.22104e+06	1.17261e+07	1.03571e+07	9.55465e+06	1.6324e+07	1.66633e+07	1.94717e+07	High	High	High	High	High	High	Not Found
FALSE	High	Master Protein	Glyma.08G047100.1.p	K02434 - aspartyl-tRNA(Asn)/glutamyl-tRNA(Gln) amidotransferase subunit B (gatB, PET112) (1 of 2)	0	110.662	32	14	70	0	2	549	61.2	8.56	176.73	14	2.751	1.227	3.601	0.100143	1	0.0173602	128.3	46.6	57.2	167.9	20.06	5.58	10.69	53.04	1.30956e+07	1.93301e+07	1.51311e+07	4.99686e+06	5.5011e+06	5.52419e+06	6.75189e+06	6.6049e+06	7.98999e+06	19807540	1.47341e+07	3.9519e+07	High	High	Peak Found	High	High	Peak Found	High
FALSE	High	Master Protein	Glyma.08G285900.1.p	PTHR13871:SF7 - NUCLEOREDOXIN 1-RELATED (1 of 1)	0	21.305	12	5	13	5	5	570	64.2	4.98	28.72	5	1.269	1.419	3.485	1	0.709824	0.0309634	70.8	55.8	79.1	194.3	26.03	7.68	42.61	32.21	8.88129e+06	8.28529e+06	1.31039e+07	6.99983e+06	6.60873e+06	7.68499e+06	8.56087e+06	9.92999e+06	1.8191e+07	1.97576e+07	3.65295e+07	2.43919e+07	High	High	Peak Found	Peak Found	High	Peak Found	Peak Found
FALSE	High	Master Protein	Glyma.06G040400.1.p	PTHR22952//PTHR22952:SF194 - CAMP-RESPONSE ELEMENT BINDING PROTEIN-RELATED // SUBFAMILY NOT NAMED (1 of 2)	0	25.325	18	5	9	3	3	329	35.9	10.32	21.93	5	1.514	2.839	3.444	0.428508	0.0112954	0.00289881	68.8	45.5	129.1	156.6	17.93	20.64	10.82	11.42	1.03703e+07	7.5156e+06	7.92773e+06	7.21867e+06	5.23717e+06	5.04389e+06	1.55798e+07	1.26055e+07	1.48688e+07	2.10101e+07	1.80368e+07	1.68843e+07	Not Found	Not Found	High	Not Found	Peak Found	High	Not Found
FALSE	High	Master Protein	Glyma.14G001200.1.p	PTHR11216:SF72 - CALCIUM-BINDING EF HAND-CONTAINING PROTEIN (1 of 5)	0	40.146	10	7	19	4	5	1037	113	5.26	28.95	7	2.31	2.444	3.442	0.445707	0.0911767	0.0369431	100.5	43.5	106.3	149.7	26.5	10.1	43.75	19.12	5.79431e+06	9.48656e+06	9.74706e+06	4.35827e+06	4.10727e+06	3.56599e+06	1.00384e+07	7.4689e+06	1.72448e+07	1.41352e+07	1.61908e+07	1.09674e+07	Peak Found	Peak Found	High	Peak Found	High	Peak Found	High
FALSE	High	Master Protein	Glyma.02G234200.1.p	K00430 - peroxidase (E1.11.1.7) (1 of 157)	0	147.588	57	14	131	4	5	324	34.9	9.11	391.89	14	0.981	1.655	3.437	1	0.131504	0.00133525	55.5	56.6	93.6	194.4	17.64	11.56	11.64	10.4	2.71147e+07	3.85495e+07	3.19455e+07	3.82491e+07	3.07428e+07	3.25758e+07	5.39255e+07	4.50527e+07	5.65744e+07	1.11972e+08	9.93019e+07	1.22411e+08	High	High	Peak Found	High	High	High	High
FALSE	High	Master Protein	Glyma.07G039000.1.p	NA	0	11.845	21	2	8	2	2	107	11.6	8.34	18.71	2	3.29	2.811	3.337	0.0634244	0.174628	0.0412761	126.1	38.3	107.7	127.9	19.24	4.99	27.5	47.68	6.10629e+06	6.43979e+06	8.60467e+06	1.98163e+06	1.80538e+06	1.95724e+06	3.3039e+06	5.69936e+06	5.50151e+06	6.53035e+06	4.25873e+06	1.10854e+07	High	High	Peak Found	High	Peak Found	Not Found	High
FALSE	High	Master Protein	Glyma.17G120600.1.p	NA	0	29.657	25	4	13	3	4	310	33.8	5.08	34.05	4	0.941	1.082	3.285	1	1	0.0233723	59.7	63.4	68.6	208.3	4.46	25.8	26.56	18.05	7.67596e+06	8.25944e+06	7.63269e+06	8.16005e+06	6.99383e+06	1.1401e+07	5.38654e+06	8.83139e+06	9.07186e+06	1.99268e+07	2.68051e+07	2.84553e+07	High	High	High	High	Peak Found	High	High
FALSE	High	Master Protein	Glyma.08G087200.1.p	K02901 - large subunit ribosomal protein L27e (RP-L27e, RPL27) (1 of 4)	0	32.701	28	4	34	2	2	135	15.7	10.42	86.85	4	0.01	0.546	3.084	NA	0.0372014	0.00177282	NA	86.4	47.2	266.4	NA	6.7	13.75	12.35	NA	NA	NA	4.0285e+06	3.90294e+06	3.53569e+06	2.63033e+06	2.05391e+06	2.13285e+06	1.12643e+07	14240893	1.20356e+07	Not Found	High	Not Found	High	High	High	High
FALSE	High	Master Protein	Glyma.06G018700.1.p	NA	0	23.394	14	6	22	2	2	449	51.5	6.33	28.99	6	4.037	4.819	3.031	0.0276305	0.0112954	0.0255228	125.3	31	149.6	94.1	20.82	18.22	30.43	20.12	4.1918e+06	6.17878e+06	6.18458e+06	1.26129e+06	1.82163e+06	1.53072e+06	8.29438e+06	4.40028e+06	7.37589e+06	4.63959e+06	6.01418e+06	4.09501e+06	Peak Found	Peak Found	High	Peak Found	Peak Found	Not Found	High
FALSE	High	Master Protein	Glyma.13G106200.1.p	K03257 - translation initiation factor 4A (EIF4A) (1 of 11)	0	173.561	42	20	165	1	5	413	46.7	5.68	439.85	20	1.916	2.8	2.942	0.126709	0.0152698	0.0219114	88.5	46.2	129.3	135.9	8.72	23.5	8.98	24.65	1.51862e+07	1.30472e+07	1.31633e+07	8.78722e+06	5.48884e+06	6.8689e+06	1.92318e+07	2.15618e+07	1.81028e+07	1.28991e+07	2.02111e+07	2.09191e+07	High	High	High	High	High	Not Found	High
FALSE	High	Master Protein	Glyma.08G097700.1.p	PTHR10288//PTHR10288:SF137 - KH DOMAIN CONTAINING RNA BINDING PROTEIN // SUBFAMILY NOT NAMED (1 of 2)	0	7.369	5	3	3	0	3	625	66.7	6.98	5.67	3	0.936	0.922	2.934	1	1	0.0335085	64.6	69.1	63.7	202.7	10	28.66	30.21	12.48	8.29255e+06	1.00943e+07	8.95689e+06	9.57434e+06	7.78249e+06	1.35514e+07	1.41208e+07	8475104	8.82409e+06	2.27485e+07	2.88116e+07	2.80929e+07	Peak Found	Peak Found	High	Peak Found	Peak Found	Peak Found	Peak Found
FALSE	High	Master Protein	Glyma.19G244500.1.p	NA	0	55.123	41	11	27	9	9	326	35.8	4.6	55.2	11	3.28	4.289	2.93	0.0171403	0.00809847	0.0239985	114.1	34.8	149.2	101.9	35.36	16.53	22.16	20.7	4.6089e+07	4.63451e+07	8.17852e+07	1.10694e+07	1.41294e+07	1.54293e+07	6.0597e+07	4.91582e+07	7.65645e+07	4.1398e+07	5.2844e+07	3.52403e+07	High	High	High	Peak Found	High	Peak Found	Peak Found
FALSE	High	Master Protein	Glyma.02G077100.1.p	K15730 - cytosolic prostaglandin-E synthase (PTGES3) (1 of 1)	0	28.201	40	5	12	1	5	191	21.2	4.53	20.06	5	1.185	0.758	2.928	1	1	0.0418118	80.7	68.1	51.6	199.5	5.63	1.64	7	71.21	1.74119e+07	1.55741e+07	1.62994e+07	1.38841e+07	1.37576e+07	1.34487e+07	1.15226e+07	1.00929e+07	1.04281e+07	3.53097e+07	4.02833e+07	1.16761e+08	Not Found	Not Found	High	High	Not Found	High	Not Found
FALSE	High	Master Protein	Glyma.17G072300.1.p	K02520 - translation initiation factor IF-3 (infC, MTIF3) (1 of 5)	0	98.44	32	9	115	0	3	275	30.8	9.11	381.98	9	1.351	1.491	2.874	0.940581	0.559034	0.017741	80.4	59.6	88.8	171.2	15.15	19.48	30.04	6.6	6.22765e+07	8.23743e+07	6.62326e+07	3.99129e+07	4.90394e+07	5.91361e+07	7.31275e+07	5.27088e+07	9.73476e+07	1.42523e+08	1.26184e+08	1.40915e+08	High	High	High	High	High	High	High
FALSE	High	Master Protein	Glyma.19G139300.1.p	K03403 - magnesium chelatase subunit H (chlH, bchH) (1 of 3)	0	115.345	17	19	66	1	3	1383	153.4	6.32	151.24	19	1.652	3.618	2.856	0.694789	0.0247994	0.034596	72.4	43.8	158.6	125.2	13.52	15.82	38.69	10.22	7.54896e+06	5.80103e+06	6.39014e+06	3.39763e+06	3.86899e+06	4.64182e+06	8.05734e+06	1.84768e+07	1.39963e+07	1.1049e+07	1.27717e+07	1.05389e+07	Not Found	Not Found	High	High	Not Found	Not Found	Not Found
FALSE	High	Master Protein	Glyma.01G161500.1.p	2.8.1.1 - Thiosulfate sulfurtransferase / Thiosulfate thiotransferase (1 of 6)	0	65.775	28	5	50	2	2	186	20.2	8.48	159.86	5	3.596	0.85	2.85	0.0120949	1	0.0143335	173.4	48.2	41	137.4	8.44	23.99	19.91	23.42	3.69413e+07	4.33918e+07	4.22962e+07	1.32348e+07	1.17626e+07	8.09536e+06	9.26375e+06	9.99746e+06	1.3321e+07	3.35255e+07	4.11421e+07	2.55029e+07	High	High	High	High	High	High	Peak Found
FALSE	High	Master Protein	Glyma.11G117500.1.p	K13195 - cold-inducible RNA-binding protein (CIRBP) (1 of 1)	0	26.622	27	3	49	1	1	140	14.9	7.99	95.81	3	0.01	0.01	2.645	NA	NA	0.0194786	NA	109.7	NA	290.3	NA	7.01	NA	22.94	NA	NA	NA	2.56057e+06	2.22579e+06	2.38314e+06	NA	NA	NA	6.30344e+06	6.24906e+06	9.15009e+06	High	Not Found	Not Found	Not Found	Not Found	Peak Found	Not Found
FALSE	High	Master Protein	Glyma.06G070300.4.p	K09566 - peptidyl-prolyl isomerase G (cyclophilin G) [EC:5.2.1.8] (PPIG) (1 of 5)	0	5.666	2	2	2	0	2	850	95.9	11.74	2.06	2	1.845	1.786	2.571	0.0916035	0.24425	0.0175202	102.5	55.5	99.2	142.8	29.88	7.44	13.63	12.86	1.19396e+07	1.09805e+07	1.85688e+07	6.4583e+06	6.47204e+06	7.33552e+06	1.15571e+07	1.19545e+07	9.20508e+06	1.46319e+07	1.89326e+07	1.66428e+07	Peak Found	Peak Found	Peak Found	Peak Found	Peak Found	Peak Found	High
FALSE	High	Master Protein	Glyma.06G172400.1.p	NA	0	59.169	27	16	47	1	16	676	79.9	5.05	92.52	16	1.391	1.289	2.567	0.917892	0.733323	0.0193687	89.1	64	82.5	164.4	5.56	12.92	26.58	18.37	2.28466e+07	2.27801e+07	2.50837e+07	1.55893e+07	1.98058e+07	1.64288e+07	2.11699e+07	1.87899e+07	3.0614e+07	4.90643e+07	3.3776e+07	4.21674e+07	High	High	High	High	High	High	High
FALSE	High	Master Protein	Glyma.05G240700.1.p	K00133 - aspartate-semialdehyde dehydrogenase (asd) (1 of 2)	0	100.957	37	10	70	5	5	376	41.1	7.81	226.95	10	1.642	2.135	2.565	0.541881	0.068493	0.0320541	89.4	54.5	116.3	139.7	18.67	19	22.24	17.56	3.27996e+07	2.78183e+07	2.24618e+07	1.69455e+07	2.11313e+07	1.45462e+07	3.6181e+07	2.95924e+07	4.60632e+07	4.34575e+07	4.95625e+07	3.4694e+07	High	High	High	High	High	High	High
FALSE	High	Master Protein	Glyma.20G199000.1.p	PF00595 - PDZ domain (Also known as DHR or GLGF) (PDZ) (1 of 2)	0	66.775	27	10	46	0	10	532	58	8.34	116.71	10	1.33	1.386	2.381	0.249356	0.215164	0.0027232	87.2	65.6	91	156.2	15.43	9.56	11.93	3.09	1.78625e+07	1.78205e+07	2.30755e+07	1.34317e+07	1.32006e+07	1.56415e+07	1.7066e+07	1.86213e+07	2.15498e+07	3.31503e+07	3.19793e+07	3.11795e+07	High	High	High	High	High	High	High
FALSE	High	Master Protein	Glyma.10G257800.1.p	PTHR10381//PTHR10381:SF18 - ATP-DEPENDENT CLP PROTEASE PROTEOLYTIC SUBUNIT // SUBFAMILY NOT NAMED (1 of 2)	0	71.189	27	8	70	0	8	372	41.2	8.73	176.06	8	1.157	1.098	2.356	1	1	0.0372241	82.5	71.3	78.3	167.9	25.57	24.94	19.87	9.91	7.45057e+07	8.31993e+07	1.19007e+08	7.77676e+07	7.18955e+07	4.69753e+07	7.89601e+07	6.65881e+07	9.86528e+07	1.44296e+08	1.69394e+08	1.74385e+08	High	High	High	High	High	High	High
FALSE	High	Master Protein	Glyma.01G225200.1.p	2.7.8.11//6.2.1.3 - CDP-diacylglycerol--inositol 3-phosphatidyltransferase / Phosphatidylinositol synthase // Long-chain-fatty-acid--CoA ligase / Lignoceroyl-CoA synthase (1 of 3)	0	8.411	4	3	6	2	2	671	75.3	7.23	5.14	3	0.896	0.317	2.302	1	0.00293069	0.00916797	79.4	88.6	28.1	203.9	1.76	7.57	25.2	10.26	8.10443e+06	8.13551e+06	8.36876e+06	8.14536e+06	9.45426e+06	9.07559e+06	2.91852e+06	2.88142e+06	1.79535e+06	2.04814e+07	2.45762e+07	2.08878e+07	High	High	Peak Found	High	High	Peak Found	Not Found
FALSE	High	Master Protein	Glyma.06G124600.1.p	NA	0	12.609	14	2	5	1	2	189	20.8	6.8	15.92	2	0.679	0.01	2.299	0.534975	NA	0.0120128	68.3	100.6	NA	231.2	9.03	20.73	NA	7.95	2.59726e+06	2.24643e+06	2.21396e+06	3.30785e+06	2.54785e+06	3.89113e+06	NA	NA	NA	7.46128e+06	8.61274e+06	7.60426e+06	Not Found	Peak Found	Peak Found	Not Found	Not Found	High	Not Found
FALSE	High	Master Protein	Glyma.04G018200.1.p	PF05542 - Protein of unknown function (DUF760) (DUF760) (1 of 16)	0	90.839	41	13	64	1	6	345	38.4	5.9	157.46	13	2.731	2.826	2.233	0.0171938	0.0164994	0.021188	124.3	45.5	128.6	101.6	9.7	14.02	25.08	12.93	2.99164e+07	3.63521e+07	3.3444e+07	1.33575e+07	1.00796e+07	1.22473e+07	3.46157e+07	2.21097e+07	3.63957e+07	3.23004e+07	2.51674e+07	2.73441e+07	High	High	High	High	High	Peak Found	High
FALSE	High	Master Protein	Glyma.08G128300.1.p	K14294 - partner of Y14 and mago (WIBG, PYM) (1 of 3)	0	9.991	15	2	4	0	2	196	22.2	9.29	8.48	2	3.107	2.256	2.224	0.0218448	0.0296079	0.0338679	144.7	46.6	105.1	103.6	6.25	18.4	24.95	29.79	1.09186e+07	1.08247e+07	9.73933e+06	3.63442e+06	2.54113e+06	3.48414e+06	7.257e+06	7.8588e+06	1.13313e+07	7.74709e+06	6.39021e+06	1.12786e+07	Not Found	Not Found	Peak Found	Peak Found	Peak Found	High	Not Found
FALSE	High	Master Protein	Glyma.05G167700.1.p	K01653 - acetolactate synthase I/III small subunit (E2.2.1.6S, ilvH, ilvN) (1 of 2)	0	19.084	9	4	26	1	4	476	52.2	9.03	53.22	4	1.725	1.614	2.191	0.56334	0.414436	0.043605	105.7	61.3	98.9	134.2	19.89	9.07	12.12	32.86	1.33326e+07	9.8661e+06	1.47589e+07	8.58735e+06	7.72997e+06	7.17805e+06	1.24771e+07	1.09245e+07	1.39404e+07	2.58749e+07	1.39288e+07	1.69341e+07	High	High	High	High	High	Peak Found	High
FALSE	High	Master Protein	Glyma.05G243600.1.p	K12861 - pre-mRNA-splicing factor SPF27 (BCAS2) (1 of 2)	0	8.534	12	4	6	0	4	253	29.4	6.58	10.24	4	4.128	4.936	2.187	0.00613981	0.00319345	0.0334957	134.8	32.7	161.2	71.4	8.01	25.1	3.03	30.02	3.32037e+07	2.89005e+07	2.90827e+07	7.04515e+06	4.73191e+06	7.92249e+06	3.53298e+07	3.47752e+07	3.33103e+07	15407387	2.19887e+07	1.22523e+07	Peak Found	Peak Found	High	Not Found	Peak Found	Peak Found	Not Found
FALSE	High	Master Protein	Glyma.09G111700.1.p	PF04755 - PAP_fibrillin (PAP_fibrillin) (1 of 23)	0	71.785	45	11	90	1	4	310	33.6	7.08	233.35	11	2.166	2.027	2.153	0.0246194	0.0201023	0.00833554	117.9	54.5	110.4	117.2	9.39	5.7	13.81	22.7	3.41978e+07	3.73016e+07	4.12408e+07	1.71762e+07	1.72241e+07	1.89541e+07	3.4909e+07	4.25055e+07	3.28722e+07	3.52846e+07	3.7078e+07	5.24663e+07	High	High	High	High	High	Not Found	High
FALSE	High	Master Protein	Glyma.01G010600.1.p	NA	0	36.94	55	7	34	6	7	138	15.9	9.55	68.69	7	1.729	1.466	2.07	0.137415	0.238497	0.0338679	110.4	63.8	93.6	132.2	10.85	14.52	6.83	20.98	2.97477e+07	3.38132e+07	3.70027e+07	2.30363e+07	1.95575e+07	1.72823e+07	2.86748e+07	3.19695e+07	2.82798e+07	2.99201e+07	4.59137e+07	4.04799e+07	High	High	High	High	High	Peak Found	High
FALSE	High	Master Protein	Glyma.18G004100.1.p	PTHR23270//PTHR23270:SF9 - PROGRAMMED CELL DEATH PROTEIN 11 PRE-RRNA PROCESSING PROTEIN RRP5 // SUBFAMILY NOT NAMED (1 of 2)	0	67.078	30	8	38	0	8	378	42.2	5.72	112.12	8	1.022	0.957	2.02	1	1	0.00174415	81.8	80	76.6	161.6	6.16	13.16	0.23	6.63	2.93603e+07	3.1841e+07	3.31768e+07	3.11499e+07	3.41795e+07	2.62235e+07	2.98246e+07	2.98062e+07	2.96963e+07	6.34277e+07	5.62044e+07	6.29296e+07	High	High	High	High	High	Peak Found	High
FALSE	High	Master Protein	Glyma.20G100400.1.p	K01354 - oligopeptidase B (ptrB) (1 of 1)	0	63.456	19	11	40	3	11	766	86.4	6.15	78.74	11	0.867	1.443	1.884	1	0.192718	0.0462043	66.8	77	111.1	145.1	20.83	6.89	21.18	14.18	4.27721e+07	2.97047e+07	3.10462e+07	3.58115e+07	3.82242e+07	3.32972e+07	5.0193e+07	5.16647e+07	7.21757e+07	6.12345e+07	8.06193e+07	6.74717e+07	High	High	High	High	High	Peak Found	High
FALSE	High	Master Protein	Glyma.19G246200.1.p	PTHR10288//PTHR10288:SF155 - KH DOMAIN CONTAINING RNA BINDING PROTEIN // SUBFAMILY NOT NAMED (1 of 6)	0	40.11	22	7	29	0	7	446	47	5.73	54.4	7	1.442	1.135	1.836	0.179833	0.915277	0.0342566	106.5	73.9	83.9	135.7	15.17	12.98	16.39	14.94	2.00667e+07	1.91305e+07	2.51776e+07	1.39183e+07	1.41517e+07	1.11064e+07	1.38498e+07	1.57997e+07	1.91206e+07	2.5549e+07	2.15007e+07	2.90791e+07	High	High	High	High	High	High	High
FALSE	High	Master Protein	Glyma.03G088500.1.p	K03012 - DNA-directed RNA polymerase II subunit RPB4 (RPB4, POLR2D) (1 of 5)	0	7.112	12	2	3	0	2	138	15.9	4.83	6.19	2	3.256	1.921	1.806	0.00096361	0.011953	0.0186906	163.1	50.1	96.2	90.5	10.97	16.77	1.7	6.7	1.42656e+07	1.1456e+07	1.27495e+07	3.55534e+06	4.89077e+06	3.9159e+06	7.37175e+06	7.52076e+06	7.62528e+06	6.461e+06	7.07273e+06	7.37839e+06	Peak Found	High	High	Peak Found	Peak Found	Peak Found	Not Found
FALSE	High	Master Protein	Glyma.05G056300.1.p	PTHR31953:SF17 - ACID BETA-FRUCTOFURANOSIDASE 3, VACUOLAR-RELATED (1 of 4)	0	128.099	29	16	99	0	7	645	71.7	6	309.71	16	0.781	0.682	1.8	1	0.162474	0.0475821	73.3	93.8	64	168.9	13.59	21.51	10.95	1.06	2.18257e+07	2.24364e+07	2.77566e+07	2.87196e+07	2.42983e+07	3.70165e+07	1.95785e+07	1.74073e+07	2.16892e+07	5.19312e+07	5.16904e+07	5.08906e+07	High	High	High	High	High	High	Peak Found
FALSE	High	Master Protein	Glyma.10G151900.1.p	K03065 - 26S proteasome regulatory subunit T5 (PSMC3, RPT5) (1 of 4)	0	229.162	56	21	180	0	20	423	47.4	5.11	511.36	21	0.833	1.028	1.731	1	1	0.0287786	72.6	87.1	89.6	150.8	8.95	19.2	3.2	11.92	1.27283e+08	1.27846e+08	1.48401e+08	1.14318e+08	1.53387e+08	1.68357e+08	1.52354e+08	1.57737e+08	1.62433e+08	2.8802e+08	2.65512e+08	2.26719e+08	High	High	High	High	High	High	High
FALSE	High	Master Protein	Glyma.02G301700.1.p	1.3.1.80 - Red chlorophyll catabolite reductase / Red Chl catabolite reductase (1 of 2)	0	50.123	32	9	42	0	9	329	37	6.18	83.32	9	1.878	0.812	1.476	0.0187642	0.486025	0.0363677	145.4	77.4	62.9	114.3	6.93	10.32	5.29	14.9	5.5055e+07	4.89283e+07	5.55344e+07	2.75574e+07	2.93167e+07	3.36061e+07	2.38132e+07	2.36135e+07	2.59471e+07	4.19056e+07	5.45497e+07	4.32633e+07	High	High	High	High	High	Peak Found	High
FALSE	High	Master Protein	Glyma.04G039200.1.p	PF11523 - Protein of unknown function (DUF3223) (DUF3223) (1 of 13)	0	32.737	30	5	16	2	5	212	24	6.28	33.11	5	1.07	0.644	0.58	1	0.0982198	0.0479015	129.9	121.4	78.2	70.5	7.28	8.9	20.33	11.88	1.27594e+07	1.38209e+07	1.1957e+07	1.19292e+07	1.02828e+07	1.21473e+07	5.52427e+06	8.29918e+06	7.6853e+06	5.67048e+06	7.10205e+06	6.924e+06	High	High	High	High	High	Peak Found	Peak Found
FALSE	High	Master Protein	Glyma.14G195000.1.p	K01953 - asparagine synthase (glutamine-hydrolysing) (asnB, ASNS) (1 of 7)	0	160.833	34	17	129	5	5	581	65.5	6.47	305.11	17	0.834	0.515	0.579	1	0.00584513	0.0146151	113.9	136.7	70.3	79.1	14.17	7.37	7.24	10.01	2.69585e+07	2.61532e+07	3.36189e+07	3.60123e+07	3.23387e+07	3.13681e+07	1.66389e+07	1.57518e+07	1.81631e+07	1.87204e+07	1.81734e+07	2.18051e+07	High	High	Peak Found	High	High	Peak Found	High
FALSE	High	Master Protein	Glyma.13G130900.1.p	PTHR19375:SF232 - MEDIATOR OF RNA POLYMERASE II TRANSCRIPTION SUBUNIT 37E-RELATED (1 of 8)	0	289	44	25	329	6	6	632	69.2	5.25	1011.3	25	0.911	1.118	0.577	1	1	0.0128761	101	110.9	124	64	5.68	13.33	4.01	15.53	3.03971e+07	3.15545e+07	2.81926e+07	2.97537e+07	3.8752e+07	3.33743e+07	3.58949e+07	3.8888e+07	3.73214e+07	1.52938e+07	1.92573e+07	2.08704e+07	High	High	High	High	High	Not Found	High
FALSE	High	Master Protein	Glyma.01G235600.1.p	PTHR22893//PTHR22893:SF44 - NADH OXIDOREDUCTASE-RELATED // SUBFAMILY NOT NAMED (1 of 5)	0	70.424	43	13	45	10	13	402	45.2	6.84	102.16	13	1.243	1.413	0.553	1	0.667129	0.046203	118.1	95	134.3	52.5	5.15	2.92	17.81	25.12	2.68138e+07	2.46744e+07	2.717e+07	21578517	2.25977e+07	2.14239e+07	2.40488e+07	3.45319e+07	3.04888e+07	8.29365e+06	1.19301e+07	1.39369e+07	High	High	High	High	High	Peak Found	High
FALSE	High	Master Protein	Glyma.11G214800.1.p	K03934 - NADH dehydrogenase (ubiquinone) Fe-S protein 1 (NDUFS1) (1 of 2)	0	152.19	38	20	88	1	8	747	81.3	6.7	214.75	20	0.74	0.921	0.547	0.109548	0.843689	0.00477929	92.2	124.7	114.8	68.2	9.52	1.84	13.19	3.98	2.28215e+07	2.14221e+07	18871186	2.86336e+07	2.96771e+07	2.89579e+07	2.66718e+07	2.18111e+07	2.83002e+07	1.58088e+07	1.69437e+07	1.58461e+07	High	High	Peak Found	High	High	Not Found	High
FALSE	High	Master Protein	Glyma.15G026400.1.p	K15718 - linoleate 9S-lipoxygenase (LOX1_5) (1 of 21)	0	536.316	54	46	491	0	6	856	96.3	6.81	1627.19	46	1.063	0.68	0.537	1	0.272464	0.0338679	129.7	122	82.9	65.5	22.64	12.89	6.23	15.21	5.28946e+07	3.36863e+07	4.14669e+07	3.89985e+07	3.36958e+07	4.36868e+07	2.65117e+07	2.66558e+07	2.38157e+07	2.09358e+07	2.1241e+07	1.59864e+07	High	High	High	High	High	Peak Found	High
FALSE	High	Master Protein	Glyma.05G185200.1.p	K15111 - solute carrier family 25 (mitochondrial S-adenosylmethionine transporter), member 26 (SLC25A26) (1 of 3)	0	16.603	11	3	7	0	3	326	35.2	9.54	9.33	3	1.13	2.159	0.508	1	0.0204503	0.0152367	94.2	83.4	180	42.3	20.27	7.88	13.34	8.69	1.76779e+07	1.22892e+07	1.30855e+07	1.08584e+07	1.15773e+07	1.26896e+07	2.50011e+07	1.98407e+07	2.54809e+07	5.18255e+06	5.87878e+06	6.14843e+06	High	High	Peak Found	High	High	Peak Found	Peak Found
FALSE	High	Master Protein	Glyma.18G256200.1.p	K02146 - V-type H+-transporting ATPase subunit d (ATPeV0D, ATP6D) (1 of 2)	0	34.011	18	5	31	0	5	351	40.6	4.96	57.68	5	0.815	0.645	0.504	1	0.162344	0.0123298	110	134.9	87	68.1	23.02	8.57	9.32	11.01	2.90533e+07	1.99612e+07	1.98423e+07	2.44775e+07	2.7754e+07	2.36576e+07	1.57901e+07	1.56184e+07	1.83803e+07	1.02078e+07	1.23485e+07	1.25153e+07	High	High	High	High	High	Peak Found	High
FALSE	High	Master Protein	Glyma.05G055500.1.p	K02355 - elongation factor G (fusA, GFM, EFG) (1 of 3)	0	379.603	51	29	293	6	6	780	86	5.59	966.82	29	1.18	0.813	0.499	1	0.289133	0.00134829	135.2	114.6	93.1	57.1	10.52	7.1	3.81	10.9	8.42092e+07	7.20069e+07	8.85692e+07	8.01976e+07	7.08209e+07	7.13697e+07	6.16986e+07	5.80241e+07	5.76087e+07	2.95521e+07	3.62183e+07	3.56037e+07	High	High	High	High	High	Peak Found	High
FALSE	High	Master Protein	Glyma.13G238200.1.p	K03251 - translation initiation factor 3 subunit D (EIF3D) (1 of 2)	0	60.937	24	9	34	0	9	557	63.7	5.69	86.7	9	0.813	0.79	0.493	1	0.573817	0.0335816	105.1	129.2	102	63.7	10.42	9.02	26.47	12.68	1.09314e+07	1.04929e+07	1.27318e+07	1.46769e+07	1.34391e+07	1.22503e+07	1.20149e+07	1.0617e+07	6.95877e+06	6.63163e+06	6.76462e+06	5.33178e+06	High	High	Not Found	High	High	Peak Found	High
FALSE	High	Master Protein	Glyma.06G039700.1.p	K08911 - light-harvesting complex I chlorophyll a/b binding protein 5 (LHCA5) (1 of 1)	0	31.11	19	4	19	0	4	285	30.7	8.02	53.12	4	0.804	0.464	0.46	0.985377	0.0210272	0.0234413	117.9	146.6	68	67.4	5	13.01	18.52	24.31	2.95684e+07	2.86398e+07	2.67879e+07	3.56175e+07	3.499e+07	4.38831e+07	1.65256e+07	1.33005e+07	1.93709e+07	1.3501e+07	2.17452e+07	1.6382e+07	High	High	Peak Found	High	High	Peak Found	High
FALSE	High	Master Protein	Glyma.08G200000.1.p	3.1.3.2 - Acid phosphatase / Phosphomonoesterase (1 of 61)	0	38.747	37	8	37	3	8	267	30.3	7.83	76.33	8	1.84	1.245	0.459	0.0959739	0.987761	0.0166878	162	88	109.6	40.4	13.23	7.53	12.11	26.22	3.38055e+07	3.32568e+07	4.18371e+07	1.98171e+07	1.83727e+07	1.70447e+07	2.07921e+07	26386369	2.28779e+07	5.3487e+06	9.09822e+06	8.42594e+06	High	High	High	High	High	Peak Found	High
FALSE	High	Master Protein	Glyma.08G007900.1.p	K03428 - magnesium-protoporphyrin O-methyltransferase (E2.1.1.11, chlM, bchM) (1 of 2)	0	112.13	47	14	99	3	3	325	35.2	7.44	242.22	14	1.36	1.132	0.458	0.853508	1	0.00378509	137.7	101.3	114.7	46.4	13.3	5.62	6.81	16.65	3.36948e+07	2.64438e+07	3.35804e+07	2.46999e+07	2.61008e+07	2.33247e+07	2.9491e+07	2.57357e+07	2.79702e+07	8.42135e+06	1.15337e+07	1.13086e+07	High	High	High	High	High	Not Found	High
FALSE	High	Master Protein	Glyma.13G328600.1.p	K01955 - carbamoyl-phosphate synthase large subunit (carB, CPA2) (1 of 2)	0	140.34	26	26	152	9	9	1166	127.4	5.31	374.08	26	1.296	1.015	0.458	0.761016	1	0.0235481	137.6	106.1	107.7	48.6	19.76	9.15	14.33	21.94	3.65501e+07	2.80169e+07	2.51934e+07	1.86178e+07	2.1616e+07	2.21469e+07	2.56318e+07	2.19365e+07	1.92736e+07	6.78995e+06	1.04909e+07	9.89366e+06	High	High	High	High	High	Not Found	High
FALSE	High	Master Protein	Glyma.01G244600.1.p	PF08263 - Leucine rich repeat N-terminal domain (LRRNT_2) (1 of 565)	0	38.156	18	6	22	1	5	463	51.4	8.21	60.33	6	0.969	1.057	0.457	1	1	0.021991	111.3	114.8	121.4	52.5	2.1	8.7	28.69	20.88	7.45503e+06	7.74771e+06	7.49306e+06	8.70878e+06	7.37556e+06	7.73132e+06	6.58088e+06	1.15017e+07	8.1723e+06	3.69871e+06	3.53536e+06	2.45756e+06	High	High	Not Found	High	High	High	High
FALSE	High	Master Protein	Glyma.03G168700.1.p	1.1.1.1//1.1.1.284//1.2.1.1 - Alcohol dehydrogenase / Aldehyde reductase // S-(hydroxymethyl)glutathione dehydrogenase / NAD-linked formaldehyde dehydrogenase (1 of 3)	0	110.567	45	11	74	0	11	379	40.3	6.76	260.46	11	0.956	0.615	0.455	1	0.0363895	0.00201274	126.4	132.2	81.3	60.2	3.99	5.48	10.98	15.35	1.34234e+08	1.25925e+08	1.24905e+08	1.31744e+08	1.22642e+08	1.36736e+08	9.24951e+07	8.10024e+07	7.45796e+07	4.66862e+07	6.30038e+07	5.99781e+07	High	High	High	High	High	High	High
FALSE	High	Master Protein	Glyma.18G076600.1.p	PTHR32382:SF4 - FASCICLIN-LIKE ARABINOGALACTAN PROTEIN 1 (1 of 6)	0	49.221	21	5	17	2	2	308	32.8	7.05	57.25	5	0.507	0.633	0.45	0.113263	0.42151	0.0489594	78.3	154.4	97.8	69.5	20.58	12.9	24.4	10.56	7.4593e+06	4.91144e+06	6.70241e+06	1.38628e+07	1.07769e+07	1.32221e+07	1.05558e+07	6.43274e+06	8.37366e+06	6.56936e+06	5.31368e+06	5.95463e+06	Not Found	High	High	Not Found	Not Found	High	High
FALSE	High	Master Protein	Glyma.13G207900.1.p	K01687 - dihydroxy-acid dehydratase (ilvD) (1 of 1)	0	142.178	32	15	102	15	15	601	64.1	6.11	276.81	15	0.902	0.85	0.44	1	0.864504	0.0130261	113	125.3	106.5	55.2	9.64	7.15	17.76	19.52	1.4127e+08	1.55318e+08	1.28044e+08	1.50968e+08	1.56664e+08	1.73047e+08	1.50696e+08	1.33195e+08	1.05052e+08	6.02854e+07	8.7921e+07	6.89703e+07	High	High	High	High	High	Peak Found	High
FALSE	High	Master Protein	Glyma.13G338700.1.p	PTHR12815:SF18 - PROTEIN TOC75-3, CHLOROPLASTIC-RELATED (1 of 2)	0	187.952	38	21	109	3	3	800	87.5	7.58	298.69	21	1.17	0.522	0.437	1	0.0115936	0.0063444	149.6	127.9	66.7	55.9	4.64	13.14	21.55	9.29	6.43699e+06	6.35846e+06	5.90104e+06	5.41623e+06	6.76164e+06	5.43576e+06	1.93944e+06	2.83575e+06	2.956e+06	2.57475e+06	2.13628e+06	2.37564e+06	High	High	Peak Found	High	High	Peak Found	Peak Found
FALSE	High	Master Protein	Glyma.03G086400.1.p	PTHR10394:SF6 - 40S RIBOSOMAL PROTEIN S8-1 (1 of 1)	0	118.177	47	12	84	0	5	220	24.8	10.36	256.85	12	1.166	1.544	0.433	1	0.145587	0.0277046	112.6	96.5	149.1	41.8	28	9.33	17.37	8.96	2.52576e+07	3.39167e+07	1.93441e+07	2.18601e+07	2.16607e+07	1.84292e+07	4.34402e+07	31810894	3.34483e+07	9.38967e+06	9.56798e+06	8.0886e+06	High	High	High	High	High	High	High
FALSE	High	Master Protein	Glyma.11G110000.1.p	K07071 - uncharacterized protein (K07071) (1 of 2)	0	63.5	27	7	49	4	4	350	38.1	8.94	146.39	7	1.088	0.442	0.433	1	0.000419768	0.000270198	146.9	135	59.7	58.4	6.62	6.06	9.5	5.16	4.22129e+07	4.26199e+07	4.74644e+07	3.91005e+07	4.33871e+07	3.91577e+07	1.51794e+07	1.73137e+07	1.83348e+07	1.70224e+07	1.5509e+07	1.69375e+07	High	High	High	High	High	High	High
FALSE	High	Master Protein	Glyma.07G074700.1.p	K00028 - malate dehydrogenase (decarboxylating) (E1.1.1.39) (1 of 5)	0	55.823	22	11	25	1	11	604	66.6	6.49	58.46	11	0.932	0.69	0.432	1	0.539457	0.0157193	122.1	131	90.4	56.5	7.44	9.78	26.05	15.14	8.00302e+07	6.89722e+07	7.41848e+07	7.61852e+07	9.15382e+07	7.95985e+07	5.49316e+07	7.94814e+07	4.95064e+07	3.14544e+07	4.19862e+07	3.43535e+07	High	High	High	High	High	Peak Found	High
FALSE	High	Master Protein	Glyma.19G142400.1.p	K01939 - adenylosuccinate synthase (purA, ADSS) (1 of 2)	0	117.743	35	14	71	0	3	485	52.6	7.62	202.36	14	0.826	0.585	0.429	1	0.16935	0.0361802	116.4	140.8	82.4	60.4	13.89	9.65	7.06	31.7	9.38137e+06	1.19705e+07	9.6103e+06	1.1629e+07	1.23539e+07	1.01936e+07	6.86685e+06	6.03447e+06	6.80596e+06	3.77739e+06	7.08938e+06	4.99136e+06	High	High	Peak Found	High	High	Peak Found	High
FALSE	High	Master Protein	Glyma.05G209200.1.p	K01256 - aminopeptidase N (pepN) (1 of 1)	0	168.579	27	24	118	0	7	984	111.2	6.68	298.58	24	0.824	0.614	0.424	1	0.246702	0.0489594	115.1	139.8	85.8	59.3	17.79	19.33	12.36	30.08	3.64915e+07	3.27464e+07	4.60031e+07	4.43019e+07	4.09312e+07	5.83757e+07	2.71833e+07	24463645	3.12472e+07	1.69738e+07	1.87977e+07	2.903e+07	High	High	Peak Found	High	High	Peak Found	High
FALSE	High	Master Protein	Glyma.13G127400.2.p	K03953 - NADH dehydrogenase (ubiquinone) 1 alpha subcomplex subunit 9 (NDUFA9) (1 of 1)	0	76.31	37	13	48	1	13	396	43.8	9.2	124.68	13	0.666	0.487	0.424	0.72092	0.140963	0.0195489	103.4	155.2	75.6	65.9	15.72	7.75	26.28	17.97	2.93745e+07	3.35039e+07	4.00719e+07	5.28944e+07	4.53376e+07	5.02724e+07	2.40783e+07	2.44821e+07	3.73017e+07	2.13371e+07	1.62304e+07	2.3288e+07	High	High	High	High	High	Peak Found	High
FALSE	High	Master Protein	Glyma.05G221100.1.p	K01961 - acetyl-CoA carboxylase, biotin carboxylase subunit (accC) (1 of 2)	0	191.928	46	20	171	1	20	539	58.9	7.5	486.1	20	1.017	0.716	0.419	1	1	0.0408047	129	126.9	90.9	53.2	23.7	20.14	7.74	16.93	2.96387e+08	299508474	1.90387e+08	2.91565e+08	303424460	205027904	2.08837e+08	2.20631e+08	1.89036e+08	9.50089e+07	1.3351e+08	1.22178e+08	High	High	High	High	High	High	High
FALSE	High	Master Protein	Glyma.02G040600.1.p	PTHR33222:SF2 - PROTEIN CURVATURE THYLAKOID 1D, CHLOROPLASTIC (1 of 2)	0	23.51	23	3	22	0	2	200	22	4.77	75.11	3	0.939	1.02	0.41	1	1	0.036797	111.5	118.7	121.1	48.7	21.86	21.14	17.21	17.62	1.81724e+07	1.78175e+07	2.5784e+07	1.38235e+07	1.93566e+07	2.1179e+07	2.01062e+07	19749588	1.45326e+07	7.94035e+06	8.55048e+06	6.01777e+06	High	High	High	High	High	Not Found	High
FALSE	High	Master Protein	Glyma.13G152500.1.p	K00963 - UTP--glucose-1-phosphate uridylyltransferase (UGP2, galU, galF) (1 of 3)	0	171.625	59	21	133	9	10	475	51.9	5.49	332.46	21	1.142	0.663	0.403	1	0.0352985	0.000527639	142.4	124.7	82.7	50.2	11.65	7.5	9.09	2.64	2.67959e+07	2.54611e+07	2.13151e+07	2.4548e+07	2.22912e+07	2.12154e+07	1.46574e+07	1.71604e+07	1.47781e+07	8.6159e+06	9.05456e+06	8.97803e+06	High	High	High	High	High	Peak Found	High
FALSE	High	Master Protein	Glyma.07G007000.1.p	K15718 - linoleate 9S-lipoxygenase (LOX1_5) (1 of 21)	0	197.134	38	26	102	4	17	864	96.8	6.15	294.41	26	0.875	0.469	0.398	1	0.0080908	0.00585467	127.7	145.9	68.4	58	16.04	11.7	15.4	12.23	4.01062e+07	3.13354e+07	3.01632e+07	4.22617e+07	3.39309e+07	3.58092e+07	1.2732e+07	1.6785e+07	1.69374e+07	1.42413e+07	1.72397e+07	1.38671e+07	High	High	Peak Found	High	High	Peak Found	High
FALSE	High	Master Protein	Glyma.12G172500.1.p	PTHR19139:SF158 - AQUAPORIN PIP2-4-RELATED (1 of 4)	0	69.181	32	5	36	0	4	287	30.8	8.13	148.86	5	0.686	0.588	0.398	1	0.354928	0.0399987	102.7	149.7	88.1	59.6	19.25	19.19	39.81	7.08	6.74042e+07	5.10248e+07	4.74344e+07	7.24609e+07	1.00794e+08	7.4365e+07	7.00491e+07	43753074	3.22433e+07	3.18715e+07	2.95862e+07	2.76718e+07	High	High	High	High	High	High	High
FALSE	High	Master Protein	Glyma.11G102100.1.p	PTHR11777:SF18 - ALANINE--TRNA LIGASE, CYTOPLASMIC (1 of 2)	0	94.699	19	14	60	8	14	999	109.6	5.97	146.3	14	1.36	0.571	0.389	0.811916	0.174628	0.00562903	163.8	120.5	68.8	46.9	8.57	3.12	28.47	5.35	9.82129e+07	1.0109e+08	8.57692e+07	7.27608e+07	7.22228e+07	6.8677e+07	4.12384e+07	6.26661e+07	3.7863e+07	2.81242e+07	2.85559e+07	2.58213e+07	High	High	High	High	High	Peak Found	High
FALSE	High	Master Protein	Glyma.10G106600.1.p	PTHR30620:SF51 - BETA-D-GLUCAN EXOHYDROLASE-LIKE PROTEIN-RELATED (1 of 5)	0	48.631	16	7	22	2	6	627	68.7	8.95	55.37	7	2.056	1.022	0.386	0.287921	1	0.0372241	184.2	89.6	91.6	34.6	25.5	9.3	23.66	19.14	3.17312e+07	2.11408e+07	3.57044e+07	1.45569e+07	1.74252e+07	1.5435e+07	1.37005e+07	1.57802e+07	2.14609e+07	7.92689e+06	5.96479e+06	5.61946e+06	High	High	High	High	High	High	High
FALSE	High	Master Protein	Glyma.18G133400.1.p	K03248 - translation initiation factor 3 subunit G (EIF3G) (1 of 2)	0	80.706	49	12	81	1	1	290	32.2	8.21	227.67	12	0.01	0.106	0.381	NA	0.000387448	0.0027232	NA	268.9	28.6	102.5	NA	7.76	15.15	5.48	NA	NA	NA	1.80587e+07	2.01276e+07	1.73646e+07	1.92187e+06	2.00096e+06	1.49283e+06	6.26327e+06	6.91068e+06	6.88325e+06	High	Not Found	Not Found	High	High	High	Not Found
FALSE	High	Master Protein	Glyma.07G019900.1.p	1.1.1.237//1.1.1.81 - Hydroxypyruvate reductase / D-glycerate dehydrogenase (1 of 1)	0	96.478	43	9	64	7	9	313	34.2	6.1	211.86	9	1.05	0.665	0.372	1	0.492991	0.0068882	136.1	129.6	86.1	48.3	1.82	15.08	19.02	19.99	9.12879e+07	8.92416e+07	9.25251e+07	9.08459e+07	8.69439e+07	6.77773e+07	4.76353e+07	6.98278e+07	5.77793e+07	2.27028e+07	3.33675e+07	3.23825e+07	High	High	High	High	High	Peak Found	High
FALSE	High	Master Protein	Glyma.07G182300.1.p	PTHR11556//PTHR11556:SF12 - FRUCTOSE-1,6-BISPHOSPHATASE-RELATED // SUBFAMILY NOT NAMED (1 of 2)	0	47.334	26	8	40	0	8	400	43.8	7.42	92.04	8	0.814	0.704	0.371	1	0.383219	0.0063444	112.8	138.5	97.4	51.3	16.08	28.58	11.18	12.8	2.80731e+07	2.42518e+07	2.02882e+07	2.97753e+07	2.63217e+07	4.43508e+07	2.42167e+07	1.95125e+07	2.09527e+07	1.11326e+07	8.79761e+06	1.10367e+07	High	High	High	High	High	Peak Found	High
FALSE	High	Master Protein	Glyma.14G064500.1.p	PTHR10795//PTHR10795:SF348 - PROPROTEIN CONVERTASE SUBTILISIN/KEXIN // SUBFAMILY NOT NAMED (1 of 14)	0	48.049	16	6	31	5	5	645	69.5	8.43	94.83	6	0.571	0.302	0.371	0.00119594	5.53e-05	3.3e-05	101.7	178.3	53.8	66.2	6.18	2.53	8.46	2.57	1.95815e+07	2.21562e+07	2.11085e+07	3.82273e+07	3.63827e+07	3.69866e+07	1.22086e+07	1.03109e+07	1.11679e+07	1.41063e+07	1.3401e+07	1.37318e+07	High	High	Peak Found	High	High	Peak Found	High
FALSE	High	Master Protein	Glyma.11G021400.1.p	4.6.1.12 - 2-C-methyl-D-erythritol 2,4-cyclodiphosphate synthase / MECDP-synthase (1 of 2)	0	56.337	34	5	26	4	5	227	24.3	8.21	84.53	5	1.127	1.013	0.364	1	1	0.00355157	128.7	114.1	115.6	41.6	4.53	12.12	20.92	10.99	2.11415e+07	2.31429e+07	2.23153e+07	1.97984e+07	1.69584e+07	2.16429e+07	1.86671e+07	2.00505e+07	2.72338e+07	6.7002e+06	8.29521e+06	7.21519e+06	High	High	High	High	High	Peak Found	High
FALSE	High	Master Protein	Glyma.11G042400.1.p	K09015 - Fe-S cluster assembly protein SufD (sufD) (1 of 1)	0	68.284	19	7	40	2	7	456	50.3	6.43	131.67	7	1.025	0.806	0.361	1	1	0.0255228	128.4	125.3	101	45.2	15.8	23.41	18.7	3.25	3.69522e+07	3.47207e+07	2.70426e+07	3.38858e+07	3.39246e+07	2.17954e+07	2.72981e+07	2.13246e+07	3.1204e+07	1.20182e+07	1.27948e+07	1.2231e+07	High	High	High	High	High	Peak Found	High
FALSE	High	Master Protein	Glyma.14G206700.1.p	PF10890 - Protein of unknown function (DUF2741) (DUF2741) (1 of 2)	0	7.854	26	2	12	0	2	72	8.3	9.66	27.85	2	1.07	0.74	0.354	1	0.976325	0.0347959	135.2	126.4	93.5	44.8	21.64	11.06	37.56	31.08	2.2847e+07	2.61437e+07	3.45339e+07	2.44357e+07	2.94365e+07	2.44403e+07	1.80832e+07	2.53441e+07	1.15789e+07	4.84399e+06	9.10958e+06	8.65374e+06	High	High	High	High	High	Peak Found	High
FALSE	High	Master Protein	Glyma.19G077300.1.p	PTHR23429//PTHR23429:SF6 - GLUCOSE-6-PHOSPHATE 1-DEHYDROGENASE G6PD // SUBFAMILY NOT NAMED (1 of 3)	0	40.891	23	10	31	9	9	519	59.7	6.76	61.96	10	0.693	0.743	0.352	0.424172	1	0.00416174	99.4	143.5	106.6	50.5	6.11	5.74	21.6	17.33	1.19601e+07	1.35178e+07	1.27891e+07	1.71512e+07	1.84537e+07	1.92276e+07	1.3708e+07	1.33046e+07	1.92687e+07	6.05663e+06	6.49243e+06	8.32957e+06	High	High	Peak Found	High	High	Peak Found	High
FALSE	High	Master Protein	Glyma.04G190800.2.p	PTHR10173//PTHR10173:SF41 - METHIONINE SULFOXIDE REDUCTASE // SUBFAMILY NOT NAMED (1 of 1)	0	38.375	25	4	45	2	2	194	21.6	5.17	132.87	4	0.274	1.104	0.349	0.0147835	1	0.0307759	40.2	146.7	162	51.2	6.6	8.31	26.65	31.86	3.08173e+06	2.70203e+06	2.94096e+06	1.17347e+07	1.07286e+07	9.94495e+06	8.73431e+06	1.18476e+07	1.50666e+07	3.74494e+06	3.18839e+06	5.74902e+06	High	High	Not Found	High	High	High	High
FALSE	High	Master Protein	Glyma.07G263100.1.p	6.1.1.4 - Leucine--tRNA ligase / Leucyl-tRNA synthetase (1 of 4)	0	60.531	12	9	36	0	9	972	110.2	6.67	91.56	9	0.997	0.424	0.347	1	0.0306168	0.0173602	144	144.5	61.2	50.2	14.66	6.29	32.71	13.01	2.26052e+07	1.8503e+07	2.48592e+07	2.48504e+07	2.2684e+07	2.20724e+07	9.61343e+06	1.24591e+07	6.28279e+06	9.37115e+06	7.88059e+06	7.30877e+06	High	High	Peak Found	High	High	Peak Found	High
FALSE	High	Master Protein	Glyma.15G219100.1.p	PTHR31810:SF6 - METACASPASE-4-RELATED (1 of 4)	0	114.479	37	15	98	3	3	415	45.2	5	277.09	15	0.043	0.176	0.341	0.000800998	0.00796263	0.046203	11.1	256.4	45.1	87.4	36.66	6.09	28.43	26.37	1.21651e+06	2.28159e+06	1.31615e+06	2.79123e+07	3.03786e+07	3.14666e+07	4.53333e+06	7.74404e+06	5.3432e+06	1.0348e+07	7.93735e+06	1.35108e+07	Peak Found	Peak Found	Peak Found	Not Found	Not Found	High	Not Found
FALSE	High	Master Protein	Glyma.11G100300.1.p	PTHR10381:SF11 - ATP-DEPENDENT CLP PROTEASE PROTEOLYTIC SUBUNIT, MITOCHONDRIAL-RELATED (1 of 2)	0	24.502	27	4	16	1	4	238	26	7.93	46.61	4	1.028	1.064	0.337	1	1	0.0372241	119.9	116.7	124.1	39.3	21.64	14.37	42.62	11.31	5.83816e+06	8.37361e+06	9.00053e+06	8.14745e+06	9.037e+06	6.76122e+06	8.67015e+06	7.53381e+06	1.59541e+07	2.37226e+06	2.74448e+06	2.97716e+06	High	High	High	High	High	Peak Found	High
FALSE	High	Master Protein	Glyma.15G158800.1.p	K13025 - ATP-dependent RNA helicase (EIF4A3, FAL1) (1 of 2)	0	44.566	17	6	30	1	4	406	45.9	6.24	72.54	6	0.743	0.448	0.336	1	0.456952	0.0402505	117.7	158.3	70.9	53.1	18.23	7.24	51.33	11.31	4.02929e+06	3.32546e+06	4.80214e+06	6.05299e+06	5.29907e+06	5.41973e+06	5.4647e+06	2.42692e+06	2.40194e+06	1.81844e+06	1.64744e+06	2.06213e+06	High	High	Peak Found	High	High	Peak Found	High
FALSE	High	Master Protein	Glyma.11G096200.1.p	K16871 - 4-aminobutyrate---pyruvate transaminase (POP2) (1 of 2)	0	24.33	14	6	18	0	6	530	58.2	7.09	43.64	6	1.165	0.427	0.331	1	0.0188505	0.0066043	159.4	136.8	58.4	45.3	20.89	9.06	22.74	8.18	2.19691e+07	1.52325e+07	2.29066e+07	1.77023e+07	1.88549e+07	2.11254e+07	8.04457e+06	5.93089e+06	9.4615e+06	6.24734e+06	5.97704e+06	6.98906e+06	High	High	High	High	High	Peak Found	High
FALSE	High	Master Protein	Glyma.17G164100.1.p	PTHR10795//PTHR10795:SF388 - PROPROTEIN CONVERTASE SUBTILISIN/KEXIN // SUBFAMILY NOT NAMED (1 of 8)	0	28.919	10	6	15	2	6	760	79.9	6.92	37.26	6	0.983	0.644	0.321	1	0.0831147	0.00186443	133.3	135.7	87.4	43.6	13.8	6.6	16.33	16.67	1.52871e+07	1.67484e+07	1.99609e+07	1.68951e+07	1.89829e+07	1.70427e+07	8.7557e+06	1.21794e+07	1.09747e+07	6.38787e+06	5.47754e+06	4.56195e+06	High	High	Peak Found	High	High	Peak Found	High
FALSE	High	Master Protein	Glyma.11G253000.1.p	K02293 - 15-cis-phytoene desaturase (PDS, crtP) (1 of 2)	0	41.289	15	7	24	2	7	570	63.4	7.69	67.8	7	0.503	0.467	0.321	0.206969	0.170891	0.0382585	87.8	174.6	81.5	56.1	34.64	15.34	25.97	17.21	1.42e+07	8.24981e+06	1.72694e+07	2.82384e+07	2.50569e+07	3.38605e+07	1.02604e+07	1.31798e+07	1.72784e+07	8.26719e+06	9.07424e+06	1.14435e+07	High	High	Peak Found	High	High	Peak Found	High
FALSE	High	Master Protein	Glyma.11G118300.1.p	K17261 - adenylyl cyclase-associated protein (CAP1_2, SRV2) (1 of 2)	0	75.637	28	11	60	1	4	469	50.6	6.8	147.11	11	0.992	1.42	0.319	1	1	0.0267307	106.4	107.2	152.2	34.2	31.78	3.32	12.62	37.2	8.42589e+06	8.60551e+06	1.42539e+07	8.92109e+06	8.67168e+06	8.34842e+06	1.06524e+07	12317978	1.37363e+07	1.6259e+06	2.77004e+06	3.60068e+06	High	High	High	High	High	Not Found	High
FALSE	High	Master Protein	Glyma.08G315600.1.p	NA	0	27.619	23	3	17	1	3	258	27.7	9.13	51.9	3	1.168	0.64	0.309	1	0.474326	0.00387752	149.9	128.3	82.1	39.6	11.47	12.89	18.23	19.29	1.74738e+07	2.18491e+07	2.09082e+07	1.46824e+07	1.78986e+07	1.89229e+07	1.48181e+07	1.05764e+07	1.14543e+07	5.52712e+06	4.41005e+06	6.52621e+06	High	High	Not Found	High	High	Peak Found	High
FALSE	High	Master Protein	Glyma.06G055100.1.p	K13566 - omega-amidase (NIT2) (1 of 1)	0	39.24	20	8	28	5	8	352	38.5	7.78	66.96	8	1.151	1.057	0.309	1	1	0.029951	131	113.7	120.2	35.2	28.76	12.71	33.74	10.19	3.248e+07	3.56208e+07	1.97225e+07	3.30831e+07	2.82083e+07	2.5841e+07	2.98038e+07	3.50176e+07	1.71052e+07	8.71906e+06	7.92115e+06	9.70798e+06	High	High	Peak Found	High	High	Peak Found	High
FALSE	High	Master Protein	Glyma.08G204300.1.p	K18660 - malonyl-CoA/methylmalonyl-CoA synthetase (ACSF3) (1 of 2)	0	48.419	14	7	25	0	7	601	65.7	6.99	63.32	7	0.919	0.793	0.305	1	0.540957	0.00133525	121.8	132.6	105.1	40.5	15.83	10.13	15.18	4.62	2.60343e+07	2.6431e+07	1.96499e+07	2.5152e+07	3.08312e+07	2.83411e+07	1.83289e+07	2.24701e+07	2.49039e+07	9.35133e+06	8.62747e+06	8.65557e+06	High	High	High	High	High	Peak Found	High
FALSE	High	Master Protein	Glyma.03G092500.1.p	PTHR10366:SF384 - NAD(P)-BINDING ROSSMANN-FOLD SUPERFAMILY PROTEIN (1 of 2)	0	40.875	21	6	35	2	6	354	38.9	7.61	93.35	6	0.791	0.62	0.299	1	0.0996053	0.00153515	116.8	147.6	91.5	44.1	17.02	1.87	16.23	12.49	1.55871e+07	1.81343e+07	2.18582e+07	2.29257e+07	2.22664e+07	2.30599e+07	1.42119e+07	1.69471e+07	1.22707e+07	6.84492e+06	8.18234e+06	6.48277e+06	High	High	High	High	High	Not Found	High
FALSE	High	Master Protein	Glyma.04G187500.1.p	K02900 - large subunit ribosomal protein L27Ae (RP-L27Ae, RPL27A) (1 of 6)	0	28.184	38	6	39	4	4	147	16.5	10.71	82.88	6	1.134	1.261	0.29	1	1	0.0178469	123.1	108.6	136.8	31.5	14.09	29.04	29.73	13.06	4.71329e+07	6.22752e+07	5.30789e+07	4.67873e+07	6.0739e+07	3.34449e+07	4.2973e+07	7.87146e+07	5.89826e+07	1.57313e+07	1.21515e+07	1.35561e+07	High	High	Not Found	High	High	High	High
FALSE	High	Master Protein	Glyma.06G176900.1.p	K02358 - elongation factor Tu (tuf, TUFM) (1 of 8)	0	531.1	67	23	531	3	3	479	52.1	6.68	2046.61	23	0.904	0.73	0.287	1	0.640172	0.00303361	123.8	136.9	100	39.3	13.68	3.19	15.97	24.82	2.59315e+08	2.24414e+08	2.95448e+08	2.88404e+08	2.72044e+08	2.86728e+08	2.09334e+08	1.76451e+08	2.4345e+08	6.09996e+07	1.0147e+08	8.22684e+07	High	High	High	High	High	High	High
FALSE	High	Master Protein	Glyma.03G128300.2.p	1.4.7.1 - Glutamate synthase (ferredoxin) / Ferredoxin-dependent glutamate synthase (1 of 2)	0	665.406	50	59	440	0	14	1621	176.6	6.84	1369.34	59	0.667	0.135	0.279	0.458832	0.00319345	0.0143131	128.2	192.1	26	53.6	24.39	22.07	36.25	8.13	1.04146e+08	6.48201e+07	1.01568e+08	2.12333e+08	1.52167e+08	143781815	2.94177e+07	2.0615e+07	1.3996e+07	3.81791e+07	4.4895e+07	4.24941e+07	High	High	High	High	High	Peak Found	High
FALSE	High	Master Protein	Glyma.18G156500.1.p	K17732 - mitochondrial-processing peptidase subunit beta [EC:3.4.24.64] (PMPCB, MAS1) (1 of 3)	0	203.494	65	26	149	2	7	527	58.8	6.99	385.74	26	1.127	1.018	0.274	1	1	0.0303216	131.8	117	119.1	32	6.51	30.26	18.28	37.63	4.48102e+07	4.47152e+07	5.00026e+07	3.97647e+07	4.77368e+07	2.52952e+07	5.26534e+07	4.04975e+07	3.76459e+07	6.70772e+06	1.4846e+07	1.0893e+07	High	High	High	High	High	Peak Found	High
FALSE	High	Master Protein	Glyma.12G222200.1.p	K00218 - protochlorophyllide reductase (E1.3.1.33, por) (1 of 2)	0	168.384	42	14	128	3	9	399	43.2	8.78	415.08	14	0.798	0.58	0.272	1	0.343587	0.00952495	120.5	151	87.5	41	20.63	18.19	15.29	22.64	1.67702e+08	1.71439e+08	1.15522e+08	2.19981e+08	2.10113e+08	1.54267e+08	136505269	1.21786e+08	1.00177e+08	4.86448e+07	7.53799e+07	5.70952e+07	High	High	High	High	High	High	High
FALSE	High	Master Protein	Glyma.19G028700.1.p	K02966 - small subunit ribosomal protein S19e (RP-S19e, RPS19) (1 of 4)	0	74.353	49	7	66	2	4	143	15.9	10.18	152.66	7	0.981	1.09	0.271	1	1	0.0396042	117.4	119.7	130.4	32.5	4.38	44.29	27.38	13.45	3.80849e+07	3.78997e+07	4.09469e+07	5.29971e+07	3.88172e+07	2.00653e+07	3.17533e+07	42299002	5.53246e+07	8.39057e+06	1.0537e+07	1.08378e+07	High	High	Not Found	High	High	Peak Found	High
FALSE	High	Master Protein	Glyma.06G118500.1.p	K00660 - chalcone synthase (CHS) (1 of 17)	0	14.229	10	3	8	3	3	378	41.8	6	16.34	3	0.979	1.441	0.27	1	1	0.0132321	106.1	108.4	156.2	29.3	19.14	33.18	21.78	26.36	3.85355e+06	5.46832e+06	4.14961e+06	3.8859e+06	4.23993e+06	6.93047e+06	8.04244e+06	5.29325e+06	6.11175e+06	1.14617e+06	1.03313e+06	1.66672e+06	High	Peak Found	Not Found	High	High	Peak Found	High
FALSE	High	Master Protein	Glyma.12G021300.1.p	3.2.1.39 - Glucan endo-1,3-beta-D-glucosidase / Laminarinase (1 of 124)	0	25.029	19	5	18	2	5	326	35.5	4.64	36.67	5	0.552	0.716	0.27	1	1	0.0447592	87	157.6	112.8	42.6	7.48	13.55	66.22	21.26	6.88937e+06	7.33937e+06	6.31766e+06	1.02415e+07	1.34167e+07	1.24823e+07	8.93735e+06	8.67426e+06	2.51565e+07	2.31633e+06	3.37372e+06	3.50444e+06	High	High	High	High	High	Peak Found	High
FALSE	High	Master Protein	Glyma.01G153400.1.p	K02986 - small subunit ribosomal protein S4 (RP-S4, rpsD) (1 of 1)	0	49.341	44	8	65	8	8	185	21.4	10.26	177.61	8	0.963	0.668	0.268	1	0.800102	0.0161174	132.9	138	92.1	36.9	33	23.66	18.63	6.63	1.87094e+08	1.48188e+08	9.32727e+07	1.53871e+08	178320494	1.09593e+08	1.02723e+08	1.16187e+08	7.95443e+07	3.77316e+07	4.30424e+07	41194839	High	High	High	High	High	Peak Found	High
FALSE	High	Master Protein	Glyma.20G007400.1.p	PTHR13697:SF1 - PYROPHOSPHATE--FRUCTOSE 6-PHOSPHATE 1-PHOSPHOTRANSFERASE SUBUNIT ALPHA 1-RELATED (1 of 2)	0	10.747	6	3	7	2	2	617	67.6	6.96	5.16	3	0.233	0.316	0.263	0.0291784	0.0393602	0.0363677	51.5	220.7	69.7	58.1	27.54	29.26	33.65	10.36	3.6068e+06	4.43436e+06	2.50481e+06	1.0868e+07	1.54494e+07	1.98804e+07	2.82175e+06	4.8822e+06	5.76659e+06	4.06677e+06	4.81113e+06	4.01589e+06	High	Peak Found	Not Found	Peak Found	High	Peak Found	Peak Found
FALSE	High	Master Protein	Glyma.02G017100.1.p	PTHR33509:SF5 - LATE EMBRYOGENESIS ABUNDANT 3 (LEA3) FAMILY PROTEIN (1 of 8)	0	19.541	27	2	18	0	2	98	10.3	9.7	51.29	2	0.458	0.311	0.261	0.149773	0.0210272	0.014849	90.3	197	61.4	51.4	11.75	23.13	17.86	25.61	4.28792e+07	4.37632e+07	3.50974e+07	6.18877e+07	9.35943e+07	9.73878e+07	3.44542e+07	2.91533e+07	2.40236e+07	2.31465e+07	2.4412e+07	3.61019e+07	High	High	High	High	High	High	Peak Found
FALSE	High	Master Protein	Glyma.04G058600.1.p	PTHR12126:SF8 - NAD(P)-BINDING ROSSMANN-FOLD SUPERFAMILY PROTEIN (1 of 5)	0	32.055	23	4	19	3	4	287	30.7	9.47	58.23	4	0.909	0.982	0.26	1	1	0.0191482	115.4	126.9	124.6	33	51.58	15.25	11.93	5.91	6.99741e+06	7.64849e+06	1.66156e+07	9.37606e+06	8.4116e+06	6.8875e+06	8.25843e+06	7.96783e+06	9.89523e+06	2.32646e+06	2.06766e+06	2.18618e+06	High	High	Peak Found	High	High	Peak Found	High
FALSE	High	Master Protein	Glyma.08G017800.1.p	PTHR22912:SF97 - MONODEHYDROASCORBATE REDUCTASE, CHLOROPLASTIC (1 of 2)	0	98.735	40	14	66	0	14	488	53.3	8.54	198.9	14	0.696	0.503	0.257	0.259221	0.0163847	0.000715529	113.3	162.9	81.9	41.9	7.71	7.51	10.97	21.62	8.26512e+07	8.01571e+07	7.12157e+07	1.08238e+08	1.15215e+08	1.25601e+08	5.00047e+07	6.22755e+07	5.79531e+07	2.963e+07	3.73494e+07	2.42703e+07	High	High	High	High	High	Not Found	High
FALSE	High	Master Protein	Glyma.05G129900.1.p	PTHR15020 - FLAVIN REDUCTASE-RELATED (1 of 2)	0	96.306	39	8	64	0	8	292	31.7	8.85	188.95	8	0.647	0.796	0.246	1	1	0.0287786	96.2	148.8	118.4	36.6	10.12	13.39	29.63	42.41	6.04383e+07	5.88838e+07	4.98649e+07	9.10624e+07	9.60596e+07	7.38516e+07	1.01053e+08	5.62213e+07	7.2493e+07	2.23813e+07	3.97307e+07	1.8324e+07	High	High	High	High	High	Peak Found	High
FALSE	High	Master Protein	Glyma.03G219500.1.p	PTHR11731:SF117 - GLUTAMYL ENDOPEPTIDASE, CHLOROPLASTIC-RELATED (1 of 2)	0	133.81	20	14	81	1	14	954	106.1	6.2	216.75	14	0.888	0.782	0.245	1	1	0.0128761	121.9	137.2	107.3	33.6	5.87	24.57	36.98	10.63	6.16703e+07	5.74386e+07	5.49278e+07	6.46857e+07	6.75796e+07	4.15985e+07	4.00463e+07	5.05612e+07	8.07323e+07	1.5853e+07	1.7309e+07	1.39778e+07	High	High	High	High	High	Peak Found	High
FALSE	High	Master Protein	Glyma.12G028300.2.p	1.3.1.72 - Delta(24)-sterol reductase / Lanosterol Delta(24)-reductase (1 of 2)	0	36.128	16	7	17	1	7	567	66	8.22	36.78	7	0.8	0.394	0.244	1	0.0173777	0.00252838	131.2	164.1	64.7	40	23.66	12.22	15.21	22.64	2.42217e+07	1.51599e+07	1.86046e+07	2.78598e+07	2.32682e+07	2.22474e+07	9.17151e+06	9.54876e+06	7.11443e+06	3.96861e+06	5.66662e+06	6.2906e+06	High	High	Peak Found	High	High	Peak Found	High
FALSE	High	Master Protein	Glyma.07G206800.1.p	PTHR10314:SF110 - CYSTEINE SYNTHASE (1 of 2)	0	246.442	61	15	193	0	3	389	41.3	7.93	754.47	15	1.043	0.67	0.239	1	0.537	0.00416174	141.3	135.5	90.9	32.3	16.68	4.42	22.51	29.3	2.68748e+07	3.22158e+07	3.76266e+07	2.8872e+07	3.08949e+07	3.14177e+07	1.52601e+07	2.07145e+07	2.42232e+07	4.76325e+06	8.79306e+06	7.37086e+06	High	High	Not Found	High	High	Peak Found	High
FALSE	High	Master Protein	Glyma.05G200500.3.p	K03428 - magnesium-protoporphyrin O-methyltransferase (E2.1.1.11, chlM, bchM) (1 of 2)	0	120.519	48	14	111	3	3	324	35.1	7.49	288.26	14	0.763	0.717	0.237	1	1	0.0233723	112.3	147.2	105.5	34.9	17.83	29.04	12.51	32.65	4.72719e+07	3.4633e+07	3.57585e+07	4.6895e+07	5.21984e+07	2.86309e+07	3.45275e+07	3.36058e+07	2.72243e+07	9.72903e+06	1.75711e+07	1.11299e+07	High	High	High	High	High	Peak Found	High
FALSE	High	Master Protein	Glyma.08G118400.1.p	PTHR13194:SF19 - NAD(P)-BINDING ROSSMANN-FOLD SUPERFAMILY PROTEIN (1 of 2)	0	148.527	39	20	113	1	7	600	65.9	8.35	311.23	20	1.336	0.793	0.228	0.931944	0.282597	0.000137613	159.2	119.1	94.5	27.2	5.37	13.99	11.27	11.38	3.99684e+07	3.67029e+07	4.06178e+07	3.74995e+07	2.94561e+07	2.99101e+07	2.37198e+07	2.73231e+07	2.19418e+07	6.81789e+06	7.4172e+06	5.90098e+06	High	High	Peak Found	High	High	Peak Found	High
FALSE	High	Master Protein	Glyma.10G002600.1.p	K02902 - large subunit ribosomal protein L28 (RP-L28, MRPL28, rpmB) (1 of 3)	0	14.97	11	3	28	0	3	158	17.8	10.76	36.32	3	1.068	1.078	0.226	1	1	0.0173165	126.7	118.6	127.9	26.9	31.38	43.77	13.33	8.29	2.69684e+07	3.66557e+07	1.93406e+07	2.52606e+07	3.93271e+07	1.59809e+07	2.22993e+07	2.72244e+07	2.90467e+07	5.71809e+06	6.03949e+06	5.12033e+06	High	High	Peak Found	High	High	High	High
FALSE	High	Master Protein	Glyma.15G102600.1.p	K02957 - small subunit ribosomal protein S15Ae (RP-S15Ae, RPS15A) (1 of 8)	0	19.97	22	5	33	0	5	260	29.7	9.23	75.44	5	0.949	0.871	0.226	1	1	0.0358639	124.6	131.3	114.4	29.7	37.92	17.64	17.25	43.13	8.51752e+07	6.76252e+07	3.7592e+07	7.12747e+07	8.10551e+07	5.66395e+07	5.7302e+07	6.20831e+07	7.90146e+07	1.60976e+07	2.54244e+07	1.06001e+07	High	High	High	High	High	High	High
FALSE	High	Master Protein	Glyma.16G041700.1.p	PTHR11122:SF18 - NDH-DEPENDENT CYCLIC ELECTRON FLOW 1 (1 of 2)	0	122.142	30	10	81	1	1	359	39.3	8.54	279.1	10	1.075	0.611	0.225	1	0.5799	0.0139938	147.7	137.5	83.9	30.9	17.78	14.76	16.56	38.25	1.74907e+07	2.49985e+07	2.09206e+07	1.52942e+07	1.9465e+07	2.03848e+07	9.82018e+06	1.37313e+07	1.18866e+07	4.37306e+06	7.85668e+06	4.12825e+06	High	High	High	High	High	Not Found	High
FALSE	High	Master Protein	Glyma.19G250200.1.p	PTHR22835:SF160 - GDSL ESTERASE/LIPASE LTL1 (1 of 12)	0	44.992	29	5	22	3	4	265	29.4	5.4	49.24	5	0.909	1.168	0.222	1	1	0.0133849	110.2	121.2	141.6	26.9	23.41	9.72	38.04	14.75	7.6708e+07	47400992	6.4672e+07	6.23509e+07	7.56815e+07	7.11433e+07	8.56749e+07	3.88424e+07	8.30928e+07	1.35191e+07	1.81919e+07	1.58042e+07	High	High	High	High	High	Peak Found	High
FALSE	High	Master Protein	Glyma.11G180900.1.p	K13035 - beta-cyano-L-alanine hydratase/nitrilase (NIT4) (1 of 2)	0	29.894	23	5	15	0	5	350	37.9	5.44	30.37	5	0.863	1.035	0.215	1	1	0.00568638	110.9	128.5	133	27.7	17.52	13.59	33.02	17.86	8.27187e+06	6.82093e+06	5.84221e+06	9.32131e+06	7.14699e+06	7.9011e+06	8.25238e+06	8.17738e+06	4.26895e+06	1.45965e+06	2.07865e+06	1.70165e+06	High	High	Peak Found	High	High	Peak Found	High
FALSE	High	Master Protein	Glyma.10G215400.1.p	K00627 - pyruvate dehydrogenase E2 component (dihydrolipoamide acetyltransferase) (DLAT, aceF, pdhC) (1 of 7)	0	63.446	35	10	54	0	2	469	48.9	8.82	135.62	10	0.94	0.859	0.214	1	1	0.00477275	124.8	132.7	114.1	28.4	9.96	25.65	26.35	13.57	1.20569e+07	1.01751e+07	1.22453e+07	1.43647e+07	1.28253e+07	8.48247e+06	6.91075e+06	1.17434e+07	1.10209e+07	2.74441e+06	2.25244e+06	2.95245e+06	High	Peak Found	High	High	High	Peak Found	High
FALSE	High	Master Protein	Glyma.09G167100.1.p	PTHR22891//PTHR22891:SF34 - EUKARYOTIC TRANSLATION INITIATION FACTOR 2C // SUBFAMILY NOT NAMED (1 of 2)	0	16.293	2	2	10	2	2	1058	116.8	9.32	22.79	2	1.265	1.089	0.211	1	1	0.0355391	141.9	112.2	122.2	23.6	35.59	34.51	17.06	16.76	1.19275e+07	5.68633e+06	1.12509e+07	8.89643e+06	4.85471e+06	1.00869e+07	1.13156e+07	9.69163e+06	8.01423e+06	1.87406e+06	1.70033e+06	2.33914e+06	High	High	High	Peak Found	High	Peak Found	Peak Found
FALSE	High	Master Protein	Glyma.06G319500.1.p	PTHR10551//PTHR10551:SF13 - FASCIN // SUBFAMILY NOT NAMED (1 of 5)	0	5.113	4	2	2	0	2	955	107.8	5.72	1.67	2	0.346	0.336	0.211	0.259075	0.0553369	0.0173602	73.1	211.3	71	44.6	17.12	22.15	40.85	10.84	1.65427e+06	1.60985e+06	2.16745e+06	3.19639e+06	4.77843e+06	4.90065e+06	780598	1.60497e+06	1.91263e+06	1.0091e+06	847390	1.04363e+06	Peak Found	Peak Found	Not Found	Peak Found	High	Peak Found	Peak Found
FALSE	High	Master Protein	Glyma.02G291100.1.p	3.5.99.10 - 2-iminobutanoate/2-iminopropanoate deaminase / Enamine/imine deaminase (1 of 4)	0	79.138	60	10	84	0	1	188	20.1	7.72	201.72	10	1.01	0.617	0.209	1	1	0.0198218	142.5	141.1	87	29.4	44.27	18.38	32.77	19.84	1.58717e+07	1.82534e+07	6.80566e+06	1.57097e+07	2.06215e+07	1.47987e+07	9.6856e+06	1.56397e+07	8.78218e+06	3.27796e+06	2.45058e+06	3.6673e+06	High	High	High	High	High	High	High
FALSE	High	Master Protein	Glyma.14G210700.1.p	K00963 - UTP--glucose-1-phosphate uridylyltransferase (UGP2, galU, galF) (1 of 3)	0	289.848	72	29	194	15	15	469	51.4	5.34	610.96	29	1.102	1.003	0.2	1	1	0.00888312	133.3	121	121.4	24.3	19.18	6.28	19.15	44.19	1.32439e+08	1.51158e+08	1.02261e+08	1.20201e+08	121591005	1.08254e+08	1.63165e+08	1.17249e+08	1.20591e+08	2.40936e+07	3.44532e+07	1.32912e+07	High	High	High	High	High	High	High
FALSE	High	Master Protein	Glyma.18G155700.1.p	K05579 - NAD(P)H-quinone oxidoreductase subunit H (ndhH) (1 of 1)	0	17.388	9	2	14	1	2	333	39.4	5.11	33.41	2	0.591	0.171	0.199	0.368808	0.00582179	0.00716317	120.6	204	34.8	40.6	36.85	12.45	10.8	26.51	9.95413e+06	4.50384e+06	8.3971e+06	1.67723e+07	1.42058e+07	1.32197e+07	2.42399e+06	2.20498e+06	2.73242e+06	2.82872e+06	2.29765e+06	3.85941e+06	High	High	Not Found	High	High	Peak Found	Not Found
FALSE	High	Master Protein	Glyma.20G050800.1.p	PTHR11404:SF17 - SUPEROXIDE DISMUTASE [FE] 3, CHLOROPLASTIC (1 of 1)	0	7.209	7	2	4	0	2	305	35.1	6.89	6.6	2	1.024	0.84	0.197	1	1	0.0307759	133.8	130.7	109.8	25.7	4.11	45.32	22.28	13.17	6.97276e+06	7.10038e+06	6.55915e+06	6.80991e+06	7.84859e+06	2.84004e+06	4.46311e+06	5.72208e+06	7.0177e+06	1.34164e+06	1.14083e+06	1.48794e+06	Peak Found	Peak Found	Not Found	Peak Found	High	Peak Found	Peak Found
FALSE	High	Master Protein	Glyma.08G200200.1.p	3.1.3.2 - Acid phosphatase / Phosphomonoesterase (1 of 61)	0	67.613	29	6	39	6	6	271	30.9	8.19	107.44	6	1.336	1.198	0.194	1	1	0.0037238	143.3	107.3	128.5	20.8	29.11	10.21	25.44	18.84	6.61838e+07	7.80058e+07	4.24503e+07	5.60176e+07	4.5839e+07	4.95479e+07	5.93365e+07	6.88484e+07	4.06998e+07	1.07091e+07	7.30985e+06	9.61614e+06	High	High	High	High	High	Not Found	High
FALSE	High	Master Protein	Glyma.01G159500.1.p	K04523 - ubiquilin (UBQLN, DSK2) (1 of 4)	0	137.411	38	11	69	2	2	541	57.2	4.87	191.15	11	0.144	0.01	0.193	0.000800998	NA	0.000616436	43.2	299	NA	57.8	15.42	4.41	NA	12.24	1.82597e+06	2.02073e+06	2.45891e+06	1.39913e+07	1.47104e+07	1.34766e+07	NA	NA	NA	2.7037e+06	2.54646e+06	3.20705e+06	High	High	High	High	High	High	Not Found
FALSE	High	Master Protein	Glyma.05G184000.1.p	K02934 - large subunit ribosomal protein L6e (RP-L6e, RPL6) (1 of 6)	0	86.686	43	10	68	0	3	232	25.8	10.18	204.74	10	1.023	0.421	0.186	1	0.0618669	0.00148508	155.6	152.1	64.1	28.2	10.2	18.44	8.01	28.63	5504023	6.70576e+06	6.4584e+06	6.31025e+06	6.34113e+06	4.49999e+06	2.75415e+06	2658089	2.3566e+06	1.17087e+06	674133	1.17606e+06	High	High	Not Found	High	High	Peak Found	Peak Found
FALSE	High	Master Protein	Glyma.06G150000.1.p	K01956 - carbamoyl-phosphate synthase small subunit (carA, CPA1) (1 of 3)	0	29.895	12	6	32	1	4	438	48	7.61	57.4	6	1.105	0.743	0.185	1	1	0.00140021	145.7	131.9	98	24.4	21.14	7	22.54	21.43	5.96695e+06	6.11113e+06	4.0717e+06	5.73058e+06	4.98101e+06	5.40185e+06	5.66698e+06	4.01478e+06	3.82086e+06	1.10419e+06	715268	1.00059e+06	High	High	Peak Found	Peak Found	Peak Found	Peak Found	High
FALSE	High	Master Protein	Glyma.04G206300.1.p	K03596 - GTP-binding protein LepA (lepA) (1 of 2)	0	18.701	9	6	12	0	6	750	83.8	7.59	13.57	6	0.823	0.475	0.184	1	0.58431	0.0347959	132.7	161.1	76.5	29.7	37.03	25.73	33.23	45.41	6.07552e+07	4.8376e+07	2.74107e+07	7.52718e+07	5.87623e+07	4.46485e+07	2.79141e+07	4.00521e+07	2.06288e+07	1.0814e+07	7.31499e+06	1.8054e+07	High	High	Peak Found	High	High	Peak Found	Peak Found
FALSE	High	Master Protein	Glyma.06G030700.1.p	PTHR13061//PTHR13061:SF10 - DYNACTIN SUBUNIT P25 // SUBFAMILY NOT NAMED (1 of 1)	0	103.404	58	12	78	5	5	273	29.6	6.15	221.69	12	0.954	1.021	0.183	1	1	0.00146507	120.9	126.6	129.3	23.2	8.2	17.91	23.71	14.72	1.74676e+07	2.04866e+07	1.84376e+07	1.93171e+07	2.00642e+07	1.41888e+07	1.48813e+07	1.97264e+07	2.41704e+07	3.38002e+06	4.40977e+06	3.53347e+06	High	High	Peak Found	High	High	Peak Found	High
FALSE	High	Master Protein	Glyma.02G185300.1.p	PTHR22912:SF48 - NADPH-DEPENDENT THIOREDOXIN REDUCTASE 3 (1 of 2)	0	213.035	45	17	119	0	7	522	57	7.06	440.27	17	1.011	0.539	0.177	1	0.00452048	2.99e-05	148.3	146.7	79.1	25.9	11.83	4.64	5.85	9.37	5.18854e+07	4.66349e+07	4.08901e+07	4.61329e+07	4.90134e+07	4.47803e+07	2.48809e+07	2.33792e+07	2.62861e+07	7.19628e+06	8.15646e+06	8.67594e+06	High	High	Not Found	High	High	Peak Found	High
FALSE	High	Master Protein	Glyma.06G001100.1.p	PTHR11777:SF14 - ALANINE--TRNA LIGASE, CHLOROPLASTIC-RELATED (1 of 2)	0	39.639	7	5	15	0	5	980	108.1	6.07	44.57	5	0.974	0.926	0.174	1	1	0.00174415	126.8	130.1	120.5	22.6	18.42	3.48	24.46	26.93	1.29782e+07	1.41126e+07	9.7533e+06	1.3732e+07	1.33235e+07	1.28092e+07	1.52488e+07	1.23351e+07	9.24524e+06	2.31221e+06	1.55913e+06	2.72771e+06	High	High	High	High	High	Peak Found	Peak Found
FALSE	High	Master Protein	Glyma.13G319500.1.p	PTHR31802:SF5 - HISTONE DEACETYLASE HDT2-RELATED (1 of 4)	0	6.542	10	2	12	1	1	193	21.4	4.42	17.19	2	0.903	0.535	0.174	1	0.571959	0.00351815	138.3	153.2	82	26.6	31.07	18.9	27.31	14.79	3.06427e+07	1.59635e+07	2.65746e+07	2.94391e+07	2.38291e+07	3.49423e+07	1.51874e+07	24143086	1.57537e+07	3.93541e+06	5.11115e+06	5.18671e+06	Peak Found	Peak Found	Not Found	Peak Found	Peak Found	Not Found	Peak Found
FALSE	High	Master Protein	Glyma.09G131900.1.p	2.3.2.5 - Glutaminyl-peptide cyclotransferase / Glutaminyl-tRNA cyclotransferase (1 of 4)	0	88.411	30	7	40	7	7	323	35.8	4.86	110.42	7	0.941	1.213	0.17	1	1	0.000986183	113.2	120.3	146	20.5	6.59	18.88	25.08	4.24	3.23207e+07	3.5293e+07	3.10754e+07	2.48324e+07	3.58663e+07	3.4355e+07	4.29892e+07	2.63045e+07	4.16716e+07	5.56366e+06	5.84566e+06	6.05554e+06	High	High	High	High	High	Peak Found	High
FALSE	High	Master Protein	Glyma.17G018200.1.p	PTHR17630:SF48 - DIENELACTONE HYDROLASE-LIKE PROTEIN (1 of 10)	0	47.503	41	7	31	4	6	239	25.6	6.64	59.14	7	0.977	0.937	0.169	1	1	0.000674544	126.8	129.7	121.6	21.9	18.9	19.55	13.68	8.69	2.24474e+07	2.50988e+07	3.21629e+07	1.80289e+07	2.61139e+07	2.56867e+07	1.99512e+07	2.4079e+07	2.62657e+07	4.57765e+06	3.85142e+06	4.33298e+06	High	High	High	High	High	Peak Found	High
FALSE	High	Master Protein	Glyma.02G076500.1.p	1.1.1.179 - D-xylose 1-dehydrogenase (NADP(+)) / D-xylose-NADP dehydrogenase (1 of 2)	0	32.988	17	4	20	4	4	361	39.8	6.47	57.75	4	0.566	0.46	0.163	0.733882	0.115046	0.00278967	103.4	182.8	84	29.8	17.89	21.58	16.56	35.76	7.19101e+06	7.36422e+06	9.7875e+06	1.30133e+07	1.6983e+07	1.11897e+07	4.8291e+06	5.98047e+06	6.7559e+06	2.12253e+06	1.27035e+06	2.72015e+06	High	High	High	High	High	Peak Found	High
FALSE	High	Master Protein	Glyma.14G094700.1.p	K00281 - glycine dehydrogenase (GLDC, gcvP) (1 of 4)	0	663.11	40	35	451	10	10	1059	114.9	7.5	1583.28	35	0.628	0.43	0.161	0.553741	0.0272743	0.0011686	113.2	180.3	77.5	29	20.07	19.22	18.37	9.88	2.58101e+08	2.22038e+08	1.71331e+08	3.78852e+08	3.53722e+08	2.58503e+08	1.52515e+08	1.52167e+08	1.08519e+08	5.66891e+07	6.71363e+07	5.69698e+07	High	High	High	High	High	Peak Found	High
FALSE	High	Master Protein	Glyma.14G184500.1.p	PTHR11680:SF12 - SERINE HYDROXYMETHYLTRANSFERASE 2, MITOCHONDRIAL (1 of 2)	0	242.654	36	15	222	0	5	507	56.1	8.27	647.19	15	0.921	0.554	0.156	1	0.686534	0.0338679	140	152	84.3	23.7	7.66	13.91	18.22	69.51	9.28997e+06	8.76573e+06	1.01919e+07	8.687e+06	1.14937e+07	1.00859e+07	4.52658e+06	5589943	6.5502e+06	1.46481e+06	4.56761e+06	1.5706e+06	High	High	High	High	High	Peak Found	High
FALSE	High	Master Protein	Glyma.10G000500.1.p	PF14576//PF14577 - Sieve element occlusion N-terminus (SEO_N) // Sieve element occlusion C-terminus (SEO_C) (1 of 21)	0	30.643	15	8	18	1	8	698	80	6.83	29.27	8	1.3	0.499	0.15	1	0.20137	0.00174415	176.3	135.7	67.6	20.4	5.66	10.88	2.89	40.99	2.45829e+07	2.33815e+07	2.19478e+07	1.63828e+07	2.03261e+07	1.79879e+07	9.21498e+06	8.9683e+06	8.69799e+06	1.32536e+06	2.69847e+06	3.2594e+06	High	High	High	High	High	Peak Found	High
FALSE	High	Master Protein	Glyma.11G133800.1.p	PTHR10283:SF76 - DICARBOXYLATE TRANSPORTER 1, CHLOROPLASTIC (1 of 2)	0	7.785	3	2	7	0	2	560	59.3	9.76	16.91	2	0.714	0.347	0.143	1	0.530155	0.0292506	129.5	181.5	62.9	26	22.31	53.02	6.88	25.38	2.21336e+07	1.49766e+07	1.57419e+07	2.65834e+07	2.20549e+07	7.56644e+06	7.04702e+06	8088349	7.64982e+06	2.02705e+06	3.37478e+06	3.16237e+06	High	High	Not Found	High	High	Peak Found	High
FALSE	High	Master Protein	Glyma.20G031600.1.p	K00592 - [ribulose-bisphosphate carboxylase]-lysine N-methyltransferase (E2.1.1.127) (1 of 2)	0	60.817	23	9	25	4	5	487	55	5.31	65.75	9	0.401	0.493	0.141	0.0488205	0.0958742	0.000711641	78.8	196.5	96.9	27.7	12.47	14.15	5.53	32.76	7726902	7.20786e+06	6.02667e+06	2.121e+07	1.60559e+07	1.79662e+07	9.10382e+06	8.86235e+06	8.17492e+06	2.53172e+06	1.38352e+06	2.72482e+06	High	High	Not Found	High	High	Peak Found	Peak Found
FALSE	High	Master Protein	Glyma.15G273600.1.p	PTHR24089:SF316 - ADP,ATP CARRIER PROTEIN 1, MITOCHONDRIAL (1 of 4)	0	81.126	30	12	76	1	1	389	42.1	9.7	213.14	12	0.569	0.478	0.134	1	0.342656	0.00541056	104.4	183.4	87.7	24.5	41.18	22.58	18.49	32.65	2.12829e+07	1.2368e+07	9.91986e+06	2.50282e+07	2.17359e+07	1.5748e+07	7.91946e+06	1.15119e+07	1.03879e+07	1.92167e+06	3.79834e+06	2.90467e+06	High	High	Peak Found	High	High	Peak Found	High
FALSE	High	Master Protein	Glyma.18G090900.1.p	PTHR13683:SF246 - ASPARTYL PROTEASE FAMILY PROTEIN (1 of 10)	0	54.282	20	7	40	4	4	490	52	8.12	123.75	7	1.049	0.366	0.127	1	0.0318628	0.000794474	165	157.4	57.6	20	26.1	20.04	12.46	23.27	5.32853e+07	3.27694e+07	5.45843e+07	4.52185e+07	5.08139e+07	6.61393e+07	2.17522e+07	1.70711e+07	1.86157e+07	4.23435e+06	6.66046e+06	6.45754e+06	High	High	Not Found	High	High	Not Found	High
FALSE	High	Master Protein	Glyma.12G066300.1.p	NA	0	14.665	31	3	12	0	3	67	7.8	10.61	18.92	3	1.442	0.867	0.114	1	0.918679	0.0292506	168.4	116.8	101.4	13.3	13.3	24.83	64.23	11.91	1.66156e+08	2.15736e+08	2.04577e+08	1.41909e+08	2.11481e+08	139712607	1.23102e+08	1.50112e+08	2.75515e+07	1.54943e+07	1.62119e+07	1.93054e+07	High	High	Peak Found	High	High	Peak Found	High
FALSE	High	Master Protein	Glyma.14G187700.1.p	K01069 - hydroxyacylglutathione hydrolase (E3.1.2.6, gloB) (1 of 5)	0	18.643	24	5	14	1	5	258	28.7	6.02	21.95	5	0.715	0.994	0.112	0.921573	1	0.000505147	101.4	141.8	141	15.8	19.4	15.04	7.72	28.46	1.1656e+07	8.89256e+06	1.31992e+07	1.36608e+07	1.62931e+07	1.85148e+07	1.60704e+07	18390339	1.62003e+07	1.20879e+06	2.18902e+06	1.82113e+06	Peak Found	High	High	High	High	Peak Found	High
FALSE	High	Master Protein	Glyma.13G114300.1.p	K15028 - translation initiation factor 3 subunit K (EIF3K) (1 of 2)	0	28.135	30	6	20	2	6	229	26.2	5.64	30.48	6	0.993	0.836	0.107	1	1	0.00410497	135.3	136.3	113.9	14.5	20.13	45.11	15.57	34.19	6.06081e+07	8.72479e+07	8.89203e+07	5.85323e+07	1.44624e+08	8.78809e+07	5.84481e+07	7.34496e+07	7.98545e+07	7.54426e+06	1.44398e+07	9.36792e+06	High	High	High	High	High	Peak Found	High
FALSE	High	Master Protein	Glyma.20G221500.1.p	PF11282 - Protein of unknown function (DUF3082) (DUF3082) (1 of 4)	0	63.384	26	5	30	3	5	307	33.2	7.93	94.36	5	0.999	1.711	0.101	1	0.475378	0.000878171	104.9	105	179.6	10.6	13.78	39.85	8.11	19.9	2.25699e+07	1.71739e+07	1.93541e+07	1.93734e+07	2.90261e+07	1.28542e+07	2.9636e+07	3.48062e+07	3.31394e+07	1.36403e+06	1988760	1.95907e+06	High	High	High	High	High	Peak Found	High
FALSE	High	Master Protein	Glyma.06G142400.1.p	K15437 - aminoacyl tRNA synthase complex-interacting multifunctional protein 1 (AIMP1, ARC1) (1 of 4)	0	32.665	23	5	16	4	5	390	42.3	6.29	22.22	5	0.908	0.429	0.086	1	0.757226	0.0462182	149.9	165	70.9	14.2	4.42	32.56	25.3	96.68	6.67828e+07	6.78661e+07	7.25231e+07	7.47264e+07	5.70458e+07	1.08353e+08	2.72786e+07	4.42239e+07	3.20787e+07	5.51272e+06	2.8584e+07	6.43502e+06	High	High	Not Found	High	High	Not Found	High
FALSE	High	Master Protein	Glyma.07G273600.1.p	5.2.1.13 - Prolycopene isomerase / CRTISO (1 of 4)	0	25.849	13	6	20	0	6	558	60.6	7.18	45.97	6	0.296	0.253	0.075	0.844481	0.329109	0.0123439	72.9	246.5	62.3	18.4	27.02	56.98	19.75	44.06	1.19278e+07	7.21976e+06	8.27906e+06	2.80011e+07	9.98783e+06	3.89121e+07	5.5234e+06	7.07368e+06	8.26237e+06	826068	2.12527e+06	2.09169e+06	High	High	Peak Found	High	High	Peak Found	High
FALSE	High	Master Protein	Glyma.08G302600.1.p	K00830 - alanine-glyoxylate transaminase / serine-glyoxylate transaminase / serine-pyruvate transaminase (AGXT) (1 of 2)	0	246.488	51	20	184	6	6	401	44.2	8.13	582.27	20	0.601	0.19	0.068	1	0.0129922	0.00184974	129.3	215	40.9	14.7	12.11	14	48.11	18.34	1.01719e+08	8.04261e+07	9.76193e+07	1.72168e+08	1.30618e+08	1.62296e+08	1.38538e+07	4.1109e+07	3.09028e+07	9.5595e+06	1.11039e+07	1.37169e+07	High	High	High	High	High	Peak Found	High
FALSE	High	Master Protein	Glyma.12G026900.1.p	PTHR32010:SF6 - PHOTOSYSTEM II STABILITY/ASSEMBLY FACTOR HCF136, CHLOROPLASTIC (1 of 3)	0	216.638	61	20	217	6	6	393	43.3	7.4	641.69	20	1.015	0.903	0.064	1	1	0.000477175	136.2	134.1	121.1	8.6	3.9	8.7	6.95	45.79	9.72964e+07	9.14408e+07	9.83806e+07	9.84921e+07	95826854	8.34071e+07	7.89906e+07	8.65617e+07	9.06975e+07	6.14962e+06	1.22957e+07	5.69915e+06	High	High	Not Found	High	High	Not Found	High
FALSE	High	Master Protein	Glyma.15G055600.1.p	K03319 - divalent anion:Na+ symporter, DASS family (TC.DASS) (1 of 2)	0	19.501	7	3	17	0	3	562	60.6	9.51	49.55	3	0.553	0.443	0.054	1	1	0.00679704	107.9	195.1	86.5	10.6	25.54	51.53	21.02	29.11	2.92192e+07	1.73907e+07	2.68079e+07	5.6376e+07	4.84833e+07	1.68678e+07	3.00601e+07	2.10343e+07	2.14882e+07	2.49452e+06	4.10823e+06	2.62782e+06	High	High	Peak Found	High	High	Peak Found	High
FALSE	High	Master Protein	Glyma.13G349200.1.p	PTHR11875:SF63 - NUCLEOSOME ASSEMBLY PROTEIN 1,4 (1 of 4)	0	74.989	37	11	66	7	7	333	38.3	4.61	137	11	1.507	1.327	0.052	0.841888	0.935176	0.0146403	155.1	102.9	136.6	5.3	62.39	50.12	31.7	34.42	1731891190	1496544650	4328634169	1422515843	1149166847	4.45522e+08	2498879594	1465725510	1524952720	5.55934e+07	5.94319e+07	1.00136e+08	High	High	High	High	High	High	Peak Found
FALSE	High	Master Protein	Glyma.15G127500.1.p	PTHR31375:SF2 - POLYGALACTURONASE/PECTINASE (1 of 8)	0	11.33	8	3	4	2	3	408	43.8	8.12	10.87	3	0.862	0.864	0.011	1	1	0.00361388	126	146.2	126.3	1.5	14.47	65.9	35.13	14.82	2.77274e+08	3.12978e+08	2.33651e+08	3.21769e+08	3.28088e+08	5.63212e+07	1.55404e+08	3.29152e+08	2.78009e+08	2.66612e+06	3.56415e+06	3.38229e+06	High	High	Peak Found	Peak Found	Peak Found	High	Peak Found
FALSE	High	Master Protein	Glyma.16G036100.1.p	PTHR11252:SF0 - POLYRIBONUCLEOTIDE NUCLEOTIDYLTRANSFERASE 1, CHLOROPLASTIC (1 of 2)	0	46.589	9	7	31	2	2	1066	118.4	7.03	100.65	7	0.352	0.396	0.01	0.163277	0.160476	2.99e-05	80.4	228.7	90.5	0.4	20.81	11.38	50.78	20.18	2.60933e+06	2.12821e+06	3.23073e+06	7.41964e+06	8.31543e+06	6.62065e+06	4.88574e+06	1.69151e+06	2.93509e+06	12950	18551.1	13698.6	High	High	Peak Found	High	High	Peak Found	High
[truncated: 7 more columns]
