# Supplementary material for: Galactolipid and Phospholipid Profile and Proteome Alterations in Soybean Leaves at the Onset of Salt Stress
Source: Front Plant Sci. 2021 Mar 17;12:644408. doi: 10.3389/fpls.2021.644408 (PMC8010258; doi:10.3389/fpls.2021.644408)
Supplement: Supplementary file 5 [file Table_6.xlsx]

## Sheet: DPEs 1hvs0h
xGO_acc	term_type	Term	queryitem	querytotal	bgitem	bgtotal	pvalue	FDR	entries
GO:0034641	P	cellular nitrogen compound metabolic process	11	124	576	29501	3.8e-05	0.0067	// Glyma.19G130800 // Glyma.07G263100 // Glyma.05G168900 // Glyma.20G143400 // Glyma.02G087800 // Glyma.03G128300 // Glyma.10G155000 // Glyma.12G229700 // Glyma.14G195000 // Glyma.05G004900 // Glyma.14G094700
GO:0044248	P	cellular catabolic process	8	124	497	29501	0.0013	0.046	// Glyma.12G210600 // Glyma.14G014800 // Glyma.05G168900 // Glyma.20G143400 // Glyma.20G007400 // Glyma.01G163900 // Glyma.04G077400 // Glyma.14G094700
GO:0006520	P	cellular amino acid metabolic process	7	124	375	29501	0.0012	0.046	// Glyma.19G130800 // Glyma.07G263100 // Glyma.05G168900 // Glyma.14G195000 // Glyma.03G128300 // Glyma.10G155000 // Glyma.14G094700
GO:0044106	P	cellular amine metabolic process	7	124	394	29501	0.0015	0.046	// Glyma.19G130800 // Glyma.07G263100 // Glyma.05G168900 // Glyma.14G195000 // Glyma.03G128300 // Glyma.10G155000 // Glyma.14G094700
GO:0044271	P	cellular nitrogen compound biosynthetic process	6	124	289	29501	0.0016	0.046	// Glyma.19G130800 // Glyma.02G087800 // Glyma.14G195000 // Glyma.03G128300 // Glyma.05G004900 // Glyma.12G229700
GO:0009056	P	catabolic process	9	124	614	29501	0.0013	0.046	// Glyma.12G210600 // Glyma.08G246300 // Glyma.14G014800 // Glyma.05G168900 // Glyma.20G143400 // Glyma.20G007400 // Glyma.01G163900 // Glyma.04G077400 // Glyma.14G094700
GO:0006519	P	cellular amino acid and derivative metabolic process	7	124	412	29501	0.002	0.05	// Glyma.19G130800 // Glyma.07G263100 // Glyma.05G168900 // Glyma.14G195000 // Glyma.03G128300 // Glyma.10G155000 // Glyma.14G094700
GO:0009308	P	amine metabolic process	7	124	444	29501	0.003	0.065	// Glyma.19G130800 // Glyma.07G263100 // Glyma.05G168900 // Glyma.14G195000 // Glyma.03G128300 // Glyma.10G155000 // Glyma.14G094700
GO:0019752	P	carboxylic acid metabolic process	7	124	580	29501	0.012	0.17	// Glyma.19G130800 // Glyma.07G263100 // Glyma.05G168900 // Glyma.14G195000 // Glyma.03G128300 // Glyma.10G155000 // Glyma.14G094700
GO:0043436	P	oxoacid metabolic process	7	124	580	29501	0.012	0.17	// Glyma.19G130800 // Glyma.07G263100 // Glyma.05G168900 // Glyma.14G195000 // Glyma.03G128300 // Glyma.10G155000 // Glyma.14G094700
GO:0055114	P	oxidation reduction	18	124	2408	29501	0.012	0.17	// Glyma.19G130800 // Glyma.01G008500 // Glyma.11G084000 // Glyma.08G017800 // Glyma.18G155700 // Glyma.03G168700 // Glyma.07G007000 // Glyma.03G128300 // Glyma.12G028300 // Glyma.11G110000 // Glyma.02G185300 // Glyma.11G093200 // Glyma.14G165000 // Glyma.11G122700 // Glyma.05G106100 // Glyma.14G094700 // Glyma.08G179600 // Glyma.10G058100
GO:0042180	P	cellular ketone metabolic process	7	124	584	29501	0.012	0.17	// Glyma.19G130800 // Glyma.07G263100 // Glyma.05G168900 // Glyma.14G195000 // Glyma.03G128300 // Glyma.10G155000 // Glyma.14G094700
GO:0006082	P	organic acid metabolic process	7	124	581	29501	0.012	0.17	// Glyma.19G130800 // Glyma.07G263100 // Glyma.05G168900 // Glyma.14G195000 // Glyma.03G128300 // Glyma.10G155000 // Glyma.14G094700
GO:0008152	P	metabolic process	71	124	14225	29501	0.027	0.35	// Glyma.01G008500 // Glyma.19G130800 // Glyma.10G295700 // Glyma.14G165000 // Glyma.10G155000 // Glyma.11G122700 // Glyma.08G086800 // Glyma.15G134800 // Glyma.09G035600 // Glyma.14G094700 // Glyma.12G210600 // Glyma.12G036400 // Glyma.14G014800 // Glyma.11G084000 // Glyma.13G062700 // Glyma.05G168900 // Glyma.12G232200 // Glyma.06G100600 // Glyma.07G007000 // Glyma.03G137000 // Glyma.03G088500 …
GO:0044281	P	small molecule metabolic process	10	124	1199	29501	0.031	0.36	// Glyma.19G130800 // Glyma.07G263100 // Glyma.05G168900 // Glyma.03G128300 // Glyma.10G155000 // Glyma.20G007400 // Glyma.14G195000 // Glyma.16G048100 // Glyma.05G004900 // Glyma.14G094700
GO:0006412	P	translation	6	124	717	29501	0.084	0.92	// Glyma.07G263100 // Glyma.12G232200 // Glyma.10G155000 // Glyma.09G248300 // Glyma.08G087200 // Glyma.15G134800
GO:0044249	P	cellular biosynthetic process	18	124	3977	29501	0.41	1	// Glyma.19G130800 // Glyma.07G263100 // Glyma.17G132300 // Glyma.12G232200 // Glyma.02G047500 // Glyma.02G087800 // Glyma.10G155000 // Glyma.03G128300 // Glyma.12G036400 // Glyma.03G088500 // Glyma.08G335300 // Glyma.06G110400 // Glyma.15G134800 // Glyma.09G248300 // Glyma.14G195000 // Glyma.05G004900 // Glyma.12G229700 // Glyma.08G087200
GO:0006807	P	nitrogen compound metabolic process	17	124	3982	29501	0.51	1	// Glyma.19G130800 // Glyma.07G263100 // Glyma.05G168900 // Glyma.20G143400 // Glyma.02G087800 // Glyma.02G047500 // Glyma.03G128300 // Glyma.10G155000 // Glyma.12G229700 // Glyma.12G036400 // Glyma.03G088500 // Glyma.08G335300 // Glyma.06G110400 // Glyma.19G183400 // Glyma.14G195000 // Glyma.05G004900 // Glyma.14G094700
GO:0034645	P	cellular macromolecule biosynthetic process	11	124	3265	29501	0.82	1	// Glyma.07G263100 // Glyma.12G232200 // Glyma.02G047500 // Glyma.06G110400 // Glyma.12G036400 // Glyma.03G088500 // Glyma.08G335300 // Glyma.10G155000 // Glyma.15G134800 // Glyma.09G248300 // Glyma.08G087200
GO:0050789	P	regulation of biological process	5	124	2908	29501	1	1	// Glyma.12G036400 // Glyma.03G253300 // Glyma.02G185300 // Glyma.02G047500 // Glyma.06G110400
GO:0044267	P	cellular protein metabolic process	13	124	3912	29501	0.85	1	// Glyma.14G014800 // Glyma.07G263100 // Glyma.10G295700 // Glyma.05G104200 // Glyma.12G232200 // Glyma.10G200100 // Glyma.10G155000 // Glyma.01G163900 // Glyma.09G248300 // Glyma.08G087200 // Glyma.15G134800 // Glyma.04G077400 // Glyma.11G244700
GO:0044260	P	cellular macromolecule metabolic process	20	124	7345	29501	0.99	1	// Glyma.14G014800 // Glyma.07G263100 // Glyma.10G295700 // Glyma.05G104200 // Glyma.10G200100 // Glyma.12G232200 // Glyma.02G047500 // Glyma.10G155000 // Glyma.20G007400 // Glyma.12G036400 // Glyma.01G163900 // Glyma.03G088500 // Glyma.08G335300 // Glyma.06G110400 // Glyma.19G183400 // Glyma.15G134800 // Glyma.09G248300 // Glyma.04G077400 // Glyma.11G244700 // Glyma.08G087200
GO:0016043	P	cellular component organization	5	124	781	29501	0.23	1	// Glyma.09G248300 // Glyma.10G163300 // Glyma.05G219400 // Glyma.09G158100 // Glyma.08G052600
GO:0010467	P	gene expression	10	124	3161	29501	0.87	1	// Glyma.07G263100 // Glyma.12G232200 // Glyma.02G047500 // Glyma.06G110400 // Glyma.12G036400 // Glyma.03G088500 // Glyma.09G248300 // Glyma.10G155000 // Glyma.15G134800 // Glyma.08G087200
GO:0065007	P	biological regulation	7	124	3380	29501	0.99	1	// Glyma.03G253300 // Glyma.02G047500 // Glyma.02G185300 // Glyma.06G110400 // Glyma.12G036400 // Glyma.14G064600 // Glyma.14G064500
GO:0006508	P	proteolysis	7	124	935	29501	0.1	1	// Glyma.02G186700 // Glyma.14G064500 // Glyma.14G014800 // Glyma.01G163900 // Glyma.14G064600 // Glyma.17G073800 // Glyma.04G077400
GO:0006139	P	nucleobase, nucleoside, nucleotide and nucleic acid metabolic process	8	124	3541	29501	0.99	1	// Glyma.07G263100 // Glyma.02G047500 // Glyma.06G110400 // Glyma.12G036400 // Glyma.03G088500 // Glyma.08G335300 // Glyma.10G155000 // Glyma.19G183400
GO:0009987	P	cellular process	47	124	11982	29501	0.76	1	// Glyma.19G235100 // Glyma.10G295700 // Glyma.10G155000 // Glyma.08G086800 // Glyma.05G219400 // Glyma.15G134800 // Glyma.09G035600 // Glyma.14G094700 // Glyma.12G210600 // Glyma.14G014800 // Glyma.05G168900 // Glyma.03G253300 // Glyma.12G232200 // Glyma.03G088500 // Glyma.02G185300 // Glyma.09G248300 // Glyma.04G077400 // Glyma.12G229700 // Glyma.08G087200 // Glyma.19G130800 // Glyma.01G232600 …
GO:0050794	P	regulation of cellular process	5	124	2860	29501	0.99	1	// Glyma.12G036400 // Glyma.03G253300 // Glyma.02G185300 // Glyma.02G047500 // Glyma.06G110400
GO:0006950	P	response to stress	6	124	1030	29501	0.27	1	// Glyma.04G107900 // Glyma.02G017100 // Glyma.17G030200 // Glyma.08G179600 // Glyma.08G335300 // Glyma.19G183400
GO:0009059	P	macromolecule biosynthetic process	11	124	3272	29501	0.82	1	// Glyma.07G263100 // Glyma.12G232200 // Glyma.02G047500 // Glyma.06G110400 // Glyma.12G036400 // Glyma.03G088500 // Glyma.08G335300 // Glyma.10G155000 // Glyma.15G134800 // Glyma.09G248300 // Glyma.08G087200
GO:0016070	P	RNA metabolic process	6	124	2518	29501	0.96	1	// Glyma.07G263100 // Glyma.02G047500 // Glyma.06G110400 // Glyma.12G036400 // Glyma.03G088500 // Glyma.10G155000
GO:0044238	P	primary metabolic process	39	124	10398	29501	0.84	1	// Glyma.02G047500 // Glyma.10G295700 // Glyma.10G155000 // Glyma.01G163900 // Glyma.08G086800 // Glyma.15G134800 // Glyma.09G035600 // Glyma.14G094700 // Glyma.14G014800 // Glyma.05G168900 // Glyma.12G232200 // Glyma.06G100600 // Glyma.03G088500 // Glyma.09G248300 // Glyma.19G223000 // Glyma.04G009800 // Glyma.14G064500 // Glyma.04G077400 // Glyma.03G128300 // Glyma.19G130800 // Glyma.17G132300 …
GO:0005975	P	carbohydrate metabolic process	7	124	1443	29501	0.41	1	// Glyma.20G153600 // Glyma.09G202900 // Glyma.06G100600 // Glyma.19G223000 // Glyma.16G048100 // Glyma.09G035600 // Glyma.20G007400
GO:0019538	P	protein metabolic process	17	124	4692	29501	0.78	1	// Glyma.02G186700 // Glyma.07G263100 // Glyma.10G295700 // Glyma.05G104200 // Glyma.12G232200 // Glyma.10G200100 // Glyma.14G014800 // Glyma.10G155000 // Glyma.01G163900 // Glyma.17G073800 // Glyma.14G064600 // Glyma.09G248300 // Glyma.08G087200 // Glyma.15G134800 // Glyma.14G064500 // Glyma.04G077400 // Glyma.11G244700
GO:0050896	P	response to stimulus	6	124	1227	29501	0.41	1	// Glyma.04G107900 // Glyma.02G017100 // Glyma.17G030200 // Glyma.08G179600 // Glyma.08G335300 // Glyma.19G183400
GO:0009058	P	biosynthetic process	22	124	4392	29501	0.22	1	// Glyma.10G155000 // Glyma.15G134800 // Glyma.13G062700 // Glyma.12G232200 // Glyma.11G110000 // Glyma.03G088500 // Glyma.09G248300 // Glyma.03G128300 // Glyma.19G130800 // Glyma.17G015600 // Glyma.17G132300 // Glyma.02G047500 // Glyma.06G110400 // Glyma.08G335300 // Glyma.14G195000 // Glyma.05G004900 // Glyma.07G263100 // Glyma.02G087800 // Glyma.12G229700 // Glyma.12G036400 // Glyma.03G137000 …
GO:0044237	P	cellular metabolic process	39	124	9028	29501	0.45	1	// Glyma.10G295700 // Glyma.10G155000 // Glyma.08G086800 // Glyma.15G134800 // Glyma.09G035600 // Glyma.14G094700 // Glyma.12G210600 // Glyma.14G014800 // Glyma.05G168900 // Glyma.12G232200 // Glyma.03G088500 // Glyma.09G248300 // Glyma.04G077400 // Glyma.12G229700 // Glyma.08G087200 // Glyma.19G130800 // Glyma.17G132300 // Glyma.04G009800 // Glyma.02G047500 // Glyma.06G110400 // Glyma.08G335300 …
GO:0043170	P	macromolecule metabolic process	25	124	8210	29501	0.98	1	// Glyma.10G295700 // Glyma.10G155000 // Glyma.17G073800 // Glyma.15G134800 // Glyma.14G014800 // Glyma.12G232200 // Glyma.03G088500 // Glyma.09G248300 // Glyma.14G064500 // Glyma.04G077400 // Glyma.02G047500 // Glyma.06G110400 // Glyma.14G064600 // Glyma.08G335300 // Glyma.01G163900 // Glyma.11G244700 // Glyma.08G246300 // Glyma.02G186700 // Glyma.07G263100 // Glyma.05G104200 // Glyma.10G200100 …
GO:0006796	P	phosphate metabolic process	5	124	2544	29501	0.98	1	// Glyma.05G104200 // Glyma.10G200100 // Glyma.10G295700 // Glyma.08G086800 // Glyma.04G009800
GO:0006793	P	phosphorus metabolic process	5	124	2544	29501	0.98	1	// Glyma.05G104200 // Glyma.10G200100 // Glyma.10G295700 // Glyma.08G086800 // Glyma.04G009800
GO:0016829	F	lyase activity	5	124	328	29501	0.013	0.99	// Glyma.12G210600 // Glyma.02G087800 // Glyma.05G004900 // Glyma.14G094700 // Glyma.12G229700
GO:0016491	F	oxidoreductase activity	20	124	2744	29501	0.011	0.99	// Glyma.19G130800 // Glyma.01G008500 // Glyma.11G084000 // Glyma.08G017800 // Glyma.08G179600 // Glyma.11G110000 // Glyma.18G155700 // Glyma.03G168700 // Glyma.07G007000 // Glyma.03G128300 // Glyma.12G028300 // Glyma.07G032800 // Glyma.02G185300 // Glyma.11G093200 // Glyma.14G165000 // Glyma.11G122700 // Glyma.05G106100 // Glyma.14G094700 // Glyma.03G014300 // Glyma.10G058100
GO:0003676	F	nucleic acid binding	18	124	3997	29501	0.42	1	// Glyma.03G260500 // Glyma.10G163300 // Glyma.02G139900 // Glyma.13G106200 // Glyma.03G253300 // Glyma.02G047500 // Glyma.03G017200 // Glyma.06G110400 // Glyma.12G036400 // Glyma.17G240400 // Glyma.15G136800 // Glyma.09G248300 // Glyma.18G133400 // Glyma.08G052600 // Glyma.09G230800 // Glyma.16G217600 // Glyma.18G058200 // Glyma.13G365500
GO:0046914	F	transition metal ion binding	11	124	2454	29501	0.46	1	// Glyma.04G242300 // Glyma.16G194100 // Glyma.14G165000 // Glyma.02G047500 // Glyma.03G168700 // Glyma.06G110400 // Glyma.16G048100 // Glyma.08G179600 // Glyma.11G093200 // Glyma.11G122700 // Glyma.18G058200
GO:0050662	F	coenzyme binding	6	124	648	29501	0.057	1	// Glyma.01G008500 // Glyma.18G155700 // Glyma.12G028300 // Glyma.11G110000 // Glyma.02G185300 // Glyma.08G017800
GO:0043169	F	cation binding	16	124	3612	29501	0.45	1	// Glyma.06G014500 // Glyma.04G242300 // Glyma.16G194100 // Glyma.06G189900 // Glyma.14G165000 // Glyma.02G047500 // Glyma.06G100600 // Glyma.07G007000 // Glyma.03G168700 // Glyma.16G048100 // Glyma.08G179600 // Glyma.06G110400 // Glyma.11G093200 // Glyma.11G122700 // Glyma.18G058200 // Glyma.05G004900
GO:0003677	F	DNA binding	6	124	2611	29501	0.97	1	// Glyma.10G163300 // Glyma.02G047500 // Glyma.06G110400 // Glyma.12G036400 // Glyma.08G052600 // Glyma.13G365500
GO:0008233	F	peptidase activity	6	124	871	29501	0.16	1	// Glyma.02G186700 // Glyma.14G014800 // Glyma.14G064500 // Glyma.14G064600 // Glyma.17G073800 // Glyma.04G077400
GO:0043167	F	ion binding	16	124	3615	29501	0.45	1	// Glyma.06G014500 // Glyma.04G242300 // Glyma.16G194100 // Glyma.06G189900 // Glyma.14G165000 // Glyma.02G047500 // Glyma.06G100600 // Glyma.07G007000 // Glyma.03G168700 // Glyma.16G048100 // Glyma.08G179600 // Glyma.06G110400 // Glyma.11G093200 // Glyma.11G122700 // Glyma.18G058200 // Glyma.05G004900
GO:0001883	F	purine nucleoside binding	12	124	4745	29501	0.99	1	// Glyma.07G263100 // Glyma.10G295700 // Glyma.19G183400 // Glyma.05G104200 // Glyma.10G155000 // Glyma.12G028300 // Glyma.13G106200 // Glyma.02G185300 // Glyma.08G335300 // Glyma.08G017800 // Glyma.11G244700 // Glyma.11G053700
GO:0001882	F	nucleoside binding	12	124	4747	29501	0.99	1	// Glyma.07G263100 // Glyma.10G295700 // Glyma.19G183400 // Glyma.05G104200 // Glyma.10G155000 // Glyma.12G028300 // Glyma.13G106200 // Glyma.02G185300 // Glyma.08G335300 // Glyma.08G017800 // Glyma.11G244700 // Glyma.11G053700
GO:0020037	F	heme binding	5	124	728	29501	0.19	1	// Glyma.11G122700 // Glyma.14G165000 // Glyma.08G179600 // Glyma.16G194100 // Glyma.11G093200
GO:0016874	F	ligase activity	5	124	654	29501	0.14	1	// Glyma.04G199200 // Glyma.03G137000 // Glyma.07G263100 // Glyma.14G195000 // Glyma.10G155000
GO:0008270	F	zinc ion binding	5	124	1411	29501	0.71	1	// Glyma.16G048100 // Glyma.18G058200 // Glyma.02G047500 // Glyma.03G168700 // Glyma.06G110400
GO:0016740	F	transferase activity	11	124	4916	29501	1	1	// Glyma.11G096200 // Glyma.17G015600 // Glyma.13G152500 // Glyma.10G295700 // Glyma.17G132300 // Glyma.05G104200 // Glyma.05G168900 // Glyma.02G002000 // Glyma.03G088500 // Glyma.09G035600 // Glyma.20G007400
GO:0000166	F	nucleotide binding	15	124	5459	29501	0.98	1	// Glyma.01G008500 // Glyma.06G189900 // Glyma.07G263100 // Glyma.10G295700 // Glyma.19G183400 // Glyma.05G104200 // Glyma.18G155700 // Glyma.10G155000 // Glyma.12G028300 // Glyma.13G106200 // Glyma.02G185300 // Glyma.08G335300 // Glyma.08G017800 // Glyma.11G244700 // Glyma.11G053700
GO:0005506	F	iron ion binding	5	124	798	29501	0.25	1	// Glyma.11G122700 // Glyma.14G165000 // Glyma.08G179600 // Glyma.16G194100 // Glyma.11G093200
GO:0005524	F	ATP binding	8	124	3990	29501	1	1	// Glyma.07G263100 // Glyma.10G295700 // Glyma.05G104200 // Glyma.10G155000 // Glyma.13G106200 // Glyma.08G335300 // Glyma.19G183400 // Glyma.11G244700
GO:0016787	F	hydrolase activity	18	124	4588	29501	0.66	1	// Glyma.16G048100 // Glyma.02G186700 // Glyma.07G263100 // Glyma.19G235100 // Glyma.10G200100 // Glyma.20G143400 // Glyma.14G014800 // Glyma.09G202900 // Glyma.06G100600 // Glyma.14G064500 // Glyma.13G106200 // Glyma.14G064600 // Glyma.08G335300 // Glyma.19G223000 // Glyma.19G183400 // Glyma.17G073800 // Glyma.06G325100 // Glyma.04G077400
GO:0030554	F	adenyl nucleotide binding	12	124	4745	29501	0.99	1	// Glyma.07G263100 // Glyma.10G295700 // Glyma.19G183400 // Glyma.05G104200 // Glyma.10G155000 // Glyma.12G028300 // Glyma.13G106200 // Glyma.02G185300 // Glyma.08G335300 // Glyma.08G017800 // Glyma.11G244700 // Glyma.11G053700
GO:0005198	F	structural molecule activity	5	124	626	29501	0.13	1	// Glyma.15G134800 // Glyma.15G112500 // Glyma.12G232200 // Glyma.08G087200 // Glyma.09G111700
GO:0048037	F	cofactor binding	7	124	827	29501	0.061	1	// Glyma.01G008500 // Glyma.11G096200 // Glyma.18G155700 // Glyma.12G028300 // Glyma.11G110000 // Glyma.02G185300 // Glyma.08G017800
GO:0017076	F	purine nucleotide binding	12	124	5181	29501	1	1	// Glyma.07G263100 // Glyma.10G295700 // Glyma.19G183400 // Glyma.05G104200 // Glyma.10G155000 // Glyma.12G028300 // Glyma.13G106200 // Glyma.02G185300 // Glyma.08G335300 // Glyma.08G017800 // Glyma.11G244700 // Glyma.11G053700
GO:0009055	F	electron carrier activity	5	124	702	29501	0.18	1	// Glyma.11G122700 // Glyma.14G165000 // Glyma.02G185300 // Glyma.01G238000 // Glyma.04G242300
GO:0016616	F	oxidoreductase activity, acting on the CH-OH group of donors, NAD or NADP as acceptor	5	124	407	29501	0.03	1	// Glyma.12G028300 // Glyma.01G008500 // Glyma.11G110000 // Glyma.11G084000 // Glyma.10G058100
GO:0046872	F	metal ion binding	15	124	3600	29501	0.56	1	// Glyma.06G014500 // Glyma.04G242300 // Glyma.16G194100 // Glyma.06G189900 // Glyma.14G165000 // Glyma.02G047500 // Glyma.03G168700 // Glyma.07G007000 // Glyma.16G048100 // Glyma.08G179600 // Glyma.06G110400 // Glyma.11G093200 // Glyma.11G122700 // Glyma.18G058200 // Glyma.05G004900
GO:0003824	F	catalytic activity	65	124	13905	29501	0.14	1	// Glyma.01G008500 // Glyma.19G130800 // Glyma.19G235100 // Glyma.10G295700 // Glyma.11G096200 // Glyma.03G128300 // Glyma.14G165000 // Glyma.10G155000 // Glyma.11G122700 // Glyma.07G032800 // Glyma.06G325100 // Glyma.09G035600 // Glyma.14G094700 // Glyma.12G210600 // Glyma.14G014800 // Glyma.11G084000 // Glyma.19G128600 // Glyma.05G168900 // Glyma.02G033900 // Glyma.06G100600 // Glyma.07G007000 …
GO:0016772	F	transferase activity, transferring phosphorus-containing groups	6	124	2985	29501	0.99	1	// Glyma.17G015600 // Glyma.10G295700 // Glyma.05G104200 // Glyma.03G088500 // Glyma.13G152500 // Glyma.20G007400
GO:0046906	F	tetrapyrrole binding	5	124	732	29501	0.2	1	// Glyma.11G122700 // Glyma.14G165000 // Glyma.08G179600 // Glyma.16G194100 // Glyma.11G093200
GO:0016614	F	oxidoreductase activity, acting on CH-OH group of donors	5	124	437	29501	0.039	1	// Glyma.12G028300 // Glyma.01G008500 // Glyma.11G110000 // Glyma.11G084000 // Glyma.10G058100
GO:0070011	F	peptidase activity, acting on L-amino acid peptides	6	124	834	29501	0.14	1	// Glyma.02G186700 // Glyma.14G014800 // Glyma.14G064500 // Glyma.14G064600 // Glyma.17G073800 // Glyma.04G077400
GO:0032559	F	adenyl ribonucleotide binding	8	124	4442	29501	1	1	// Glyma.07G263100 // Glyma.10G295700 // Glyma.05G104200 // Glyma.10G155000 // Glyma.13G106200 // Glyma.08G335300 // Glyma.19G183400 // Glyma.11G244700
GO:0005515	F	protein binding	18	124	6255	29501	0.98	1	// Glyma.08G112000 // Glyma.06G137700 // Glyma.14G064600 // Glyma.02G270000 // Glyma.12G010300 // Glyma.05G055600 // Glyma.07G007000 // Glyma.04G227400 // Glyma.08G065000 // Glyma.08G128300 // Glyma.03G064800 // Glyma.16G140800 // Glyma.14G064500 // Glyma.04G199200 // Glyma.19G174700 // Glyma.08G349900 // Glyma.12G005400 // Glyma.09G226400
GO:0032555	F	purine ribonucleotide binding	8	124	4867	29501	1	1	// Glyma.07G263100 // Glyma.10G295700 // Glyma.05G104200 // Glyma.10G155000 // Glyma.13G106200 // Glyma.08G335300 // Glyma.19G183400 // Glyma.11G244700
GO:0032553	F	ribonucleotide binding	8	124	4867	29501	1	1	// Glyma.07G263100 // Glyma.10G295700 // Glyma.05G104200 // Glyma.10G155000 // Glyma.13G106200 // Glyma.08G335300 // Glyma.19G183400 // Glyma.11G244700
GO:0005488	F	binding	66	124	17591	29501	0.94	1	// Glyma.01G008500 // Glyma.04G242300 // Glyma.03G260500 // Glyma.10G295700 // Glyma.08G017800 // Glyma.11G096200 // Glyma.12G010300 // Glyma.10G155000 // Glyma.13G106200 // Glyma.08G128300 // Glyma.08G112000 // Glyma.09G230800 // Glyma.18G058200 // Glyma.08G349900 // Glyma.06G189900 // Glyma.02G139900 // Glyma.02G270000 // Glyma.03G253300 // Glyma.06G100600 // Glyma.07G007000 // Glyma.03G017200 …
GO:0043231	C	intracellular membrane-bounded organelle	6	124	1789	29501	0.77	1	// Glyma.10G163300 // Glyma.15G112500 // Glyma.09G111700 // Glyma.07G032800 // Glyma.08G052600 // Glyma.13G365500
GO:0043232	C	intracellular non-membrane-bounded organelle	5	124	741	29501	0.2	1	// Glyma.15G134800 // Glyma.12G232200 // Glyma.10G163300 // Glyma.08G087200 // Glyma.08G052600
GO:0044424	C	intracellular part	16	124	3337	29501	0.33	1	// Glyma.06G014500 // Glyma.05G168900 // Glyma.14G014800 // Glyma.10G163300 // Glyma.15G112500 // Glyma.12G232200 // Glyma.10G155000 // Glyma.09G111700 // Glyma.07G032800 // Glyma.09G248300 // Glyma.08G087200 // Glyma.08G052600 // Glyma.15G134800 // Glyma.04G077400 // Glyma.20G007400 // Glyma.13G365500
GO:0043229	C	intracellular organelle	10	124	2514	29501	0.62	1	// Glyma.06G014500 // Glyma.10G163300 // Glyma.15G112500 // Glyma.12G232200 // Glyma.09G111700 // Glyma.07G032800 // Glyma.08G087200 // Glyma.08G052600 // Glyma.15G134800 // Glyma.13G365500
GO:0005622	C	intracellular	18	124	3706	29501	0.29	1	// Glyma.06G014500 // Glyma.05G168900 // Glyma.14G014800 // Glyma.10G163300 // Glyma.15G112500 // Glyma.12G232200 // Glyma.10G155000 // Glyma.09G111700 // Glyma.17G073800 // Glyma.07G032800 // Glyma.09G248300 // Glyma.08G087200 // Glyma.08G052600 // Glyma.15G134800 // Glyma.01G232600 // Glyma.04G077400 // Glyma.20G007400 // Glyma.13G365500
GO:0043227	C	membrane-bounded organelle	6	124	1798	29501	0.77	1	// Glyma.10G163300 // Glyma.15G112500 // Glyma.09G111700 // Glyma.07G032800 // Glyma.08G052600 // Glyma.13G365500
GO:0044444	C	cytoplasmic part	7	124	1156	29501	0.22	1	// Glyma.15G112500 // Glyma.12G232200 // Glyma.09G111700 // Glyma.07G032800 // Glyma.08G087200 // Glyma.15G134800 // Glyma.20G007400
GO:0005737	C	cytoplasm	10	124	1539	29501	0.11	1	// Glyma.15G112500 // Glyma.12G232200 // Glyma.10G155000 // Glyma.09G111700 // Glyma.07G032800 // Glyma.09G248300 // Glyma.08G087200 // Glyma.05G168900 // Glyma.15G134800 // Glyma.20G007400
GO:0032991	C	macromolecular complex	9	124	1849	29501	0.38	1	// Glyma.06G014500 // Glyma.14G014800 // Glyma.10G163300 // Glyma.12G232200 // Glyma.08G087200 // Glyma.08G052600 // Glyma.15G134800 // Glyma.04G077400 // Glyma.20G007400
GO:0044464	C	cell part	19	124	6957	29501	0.99	1	// Glyma.06G014500 // Glyma.05G168900 // Glyma.14G014800 // Glyma.10G163300 // Glyma.15G112500 // Glyma.12G232200 // Glyma.10G155000 // Glyma.09G111700 // Glyma.17G073800 // Glyma.07G032800 // Glyma.09G248300 // Glyma.08G087200 // Glyma.08G052600 // Glyma.15G134800 // Glyma.01G232600 // Glyma.13G338700 // Glyma.04G077400 // Glyma.20G007400 // Glyma.13G365500
GO:0005623	C	cell	19	124	6957	29501	0.99	1	// Glyma.06G014500 // Glyma.05G168900 // Glyma.14G014800 // Glyma.10G163300 // Glyma.15G112500 // Glyma.12G232200 // Glyma.10G155000 // Glyma.09G111700 // Glyma.17G073800 // Glyma.07G032800 // Glyma.09G248300 // Glyma.08G087200 // Glyma.08G052600 // Glyma.15G134800 // Glyma.01G232600 // Glyma.13G338700 // Glyma.04G077400 // Glyma.20G007400 // Glyma.13G365500
GO:0043228	C	non-membrane-bounded organelle	5	124	741	29501	0.2	1	// Glyma.15G134800 // Glyma.12G232200 // Glyma.10G163300 // Glyma.08G087200 // Glyma.08G052600
GO:0043226	C	organelle	10	124	2514	29501	0.62	1	// Glyma.06G014500 // Glyma.10G163300 // Glyma.15G112500 // Glyma.12G232200 // Glyma.09G111700 // Glyma.07G032800 // Glyma.08G087200 // Glyma.08G052600 // Glyma.15G134800 // Glyma.13G365500

## Sheet: DPEs 2hvs0h
Supplementary Table S6
GO enrichment of differentially expressed proteins from 0.5, 1 and 2 h
GO_acc	term_type	Term	queryitem	querytotal	bgitem	bgtotal	pvalue	FDR	entries
GO:0055114	P	oxidation reduction	29	142	2408	29501	4e-06	0.00075	// Glyma.19G077300 // Glyma.04G190800 // Glyma.03G092500 // Glyma.13G127400 // Glyma.20G050800 // Glyma.15G026400 // Glyma.14G094700 // Glyma.05G240700 // Glyma.02G076500 // Glyma.05G129900 // Glyma.02G234200 // Glyma.07G007000 // Glyma.02G185300 // Glyma.03G128300 // Glyma.08G285900 // Glyma.18G155700 // Glyma.03G168700 // Glyma.11G253000 // Glyma.12G028300 // Glyma.08G017800 // Glyma.01G235600 …
GO:0034641	P	cellular nitrogen compound metabolic process	12	142	576	29501	2.8e-05	0.0026	// Glyma.07G263100 // Glyma.11G102100 // Glyma.07G019900 // Glyma.14G184500 // Glyma.10G155000 // Glyma.03G128300 // Glyma.05G200500 // Glyma.14G195000 // Glyma.08G007900 // Glyma.05G240700 // Glyma.06G001100 // Glyma.14G094700
GO:0044281	P	small molecule metabolic process	17	142	1199	29501	7.6e-05	0.0039	// Glyma.19G142400 // Glyma.20G007400 // Glyma.11G102100 // Glyma.19G077300 // Glyma.07G019900 // Glyma.08G138200 // Glyma.14G184500 // Glyma.10G155000 // Glyma.03G128300 // Glyma.19G124500 // Glyma.05G200500 // Glyma.07G263100 // Glyma.14G195000 // Glyma.05G240700 // Glyma.06G001100 // Glyma.06G118500 // Glyma.14G094700
GO:0006520	P	cellular amino acid metabolic process	9	142	375	29501	0.0001	0.0039	// Glyma.07G263100 // Glyma.11G102100 // Glyma.14G184500 // Glyma.10G155000 // Glyma.03G128300 // Glyma.14G195000 // Glyma.05G240700 // Glyma.06G001100 // Glyma.14G094700
GO:0008152	P	metabolic process	91	142	14225	29501	0.00011	0.0039	// Glyma.17G072300 // Glyma.07G182300 // Glyma.03G092500 // Glyma.17G088900 // Glyma.05G007200 // Glyma.15G026400 // Glyma.14G094700 // Glyma.02G076500 // Glyma.10G106600 // Glyma.19G124500 // Glyma.10G002600 // Glyma.03G128300 // Glyma.01G225200 // Glyma.06G040400 // Glyma.01G235600 // Glyma.06G001100 // Glyma.13G152500 // Glyma.11G244700 // Glyma.14G206700 // Glyma.15G127500 // Glyma.08G302600 …
GO:0044106	P	cellular amine metabolic process	9	142	394	29501	0.00015	0.0046	// Glyma.07G263100 // Glyma.11G102100 // Glyma.14G184500 // Glyma.10G155000 // Glyma.03G128300 // Glyma.14G195000 // Glyma.05G240700 // Glyma.06G001100 // Glyma.14G094700
GO:0006519	P	cellular amino acid and derivative metabolic process	9	142	412	29501	0.0002	0.0055	// Glyma.07G263100 // Glyma.11G102100 // Glyma.14G184500 // Glyma.10G155000 // Glyma.03G128300 // Glyma.14G195000 // Glyma.05G240700 // Glyma.06G001100 // Glyma.14G094700
GO:0009308	P	amine metabolic process	9	142	444	29501	0.00035	0.0082	// Glyma.07G263100 // Glyma.11G102100 // Glyma.14G184500 // Glyma.10G155000 // Glyma.03G128300 // Glyma.14G195000 // Glyma.05G240700 // Glyma.06G001100 // Glyma.14G094700
GO:0019752	P	carboxylic acid metabolic process	10	142	580	29501	0.00057	0.0094	// Glyma.07G263100 // Glyma.11G102100 // Glyma.14G184500 // Glyma.10G155000 // Glyma.03G128300 // Glyma.14G195000 // Glyma.05G240700 // Glyma.06G001100 // Glyma.06G118500 // Glyma.14G094700
GO:0043436	P	oxoacid metabolic process	10	142	580	29501	0.00057	0.0094	// Glyma.07G263100 // Glyma.11G102100 // Glyma.14G184500 // Glyma.10G155000 // Glyma.03G128300 // Glyma.14G195000 // Glyma.05G240700 // Glyma.06G001100 // Glyma.06G118500 // Glyma.14G094700
GO:0042180	P	cellular ketone metabolic process	10	142	584	29501	0.00061	0.0094	// Glyma.07G263100 // Glyma.11G102100 // Glyma.14G184500 // Glyma.10G155000 // Glyma.03G128300 // Glyma.14G195000 // Glyma.05G240700 // Glyma.06G001100 // Glyma.06G118500 // Glyma.14G094700
GO:0006082	P	organic acid metabolic process	10	142	581	29501	0.00058	0.0094	// Glyma.07G263100 // Glyma.11G102100 // Glyma.14G184500 // Glyma.10G155000 // Glyma.03G128300 // Glyma.14G195000 // Glyma.05G240700 // Glyma.06G001100 // Glyma.06G118500 // Glyma.14G094700
GO:0006412	P	translation	11	142	717	29501	0.00079	0.011	// Glyma.17G072300 // Glyma.05G184000 // Glyma.07G263100 // Glyma.11G102100 // Glyma.19G028700 // Glyma.10G155000 // Glyma.10G002600 // Glyma.09G248300 // Glyma.08G087200 // Glyma.06G001100 // Glyma.15G102600
GO:0006694	P	steroid biosynthetic process	5	142	154	29501	0.001	0.014	// Glyma.03G092500 // Glyma.13G127400 // Glyma.11G110000 // Glyma.05G129900 // Glyma.04G058600
GO:0008202	P	steroid metabolic process	5	142	158	29501	0.0012	0.014	// Glyma.03G092500 // Glyma.13G127400 // Glyma.11G110000 // Glyma.05G129900 // Glyma.04G058600
GO:0008610	P	lipid biosynthetic process	8	142	470	29501	0.0022	0.026	// Glyma.05G129900 // Glyma.11G021400 // Glyma.08G138200 // Glyma.11G110000 // Glyma.06G118500 // Glyma.03G092500 // Glyma.13G127400 // Glyma.04G058600
GO:0051186	P	cofactor metabolic process	5	142	231	29501	0.0057	0.063	// Glyma.05G200500 // Glyma.17G088900 // Glyma.07G019900 // Glyma.11G042400 // Glyma.08G007900
GO:0006066	P	alcohol metabolic process	5	142	244	29501	0.0071	0.074	// Glyma.19G124500 // Glyma.19G077300 // Glyma.07G019900 // Glyma.08G138200 // Glyma.20G007400
GO:0009058	P	biosynthetic process	32	142	4392	29501	0.01	0.099	// Glyma.17G072300 // Glyma.11G102100 // Glyma.08G138200 // Glyma.19G028700 // Glyma.10G155000 // Glyma.03G092500 // Glyma.13G127400 // Glyma.17G088900 // Glyma.05G240700 // Glyma.13G062700 // Glyma.05G129900 // Glyma.03G088500 // Glyma.05G200500 // Glyma.10G002600 // Glyma.09G248300 // Glyma.11G042400 // Glyma.03G128300 // Glyma.04G058600 // Glyma.06G040400 // Glyma.11G021400 // Glyma.14G195000 …
GO:0044271	P	cellular nitrogen compound biosynthetic process	5	142	289	29501	0.014	0.13	// Glyma.05G240700 // Glyma.05G200500 // Glyma.14G195000 // Glyma.03G128300 // Glyma.08G007900
GO:0044283	P	small molecule biosynthetic process	5	142	377	29501	0.037	0.33	// Glyma.05G240700 // Glyma.08G138200 // Glyma.03G128300 // Glyma.14G195000 // Glyma.06G118500
GO:0006508	P	proteolysis	9	142	935	29501	0.038	0.33	// Glyma.14G014800 // Glyma.20G199000 // Glyma.17G164100 // Glyma.18G090900 // Glyma.03G219500 // Glyma.14G064500 // Glyma.05G007200 // Glyma.15G219100 // Glyma.20G100400
GO:0005975	P	carbohydrate metabolic process	12	142	1443	29501	0.047	0.38	// Glyma.12G021300 // Glyma.07G019900 // Glyma.10G106600 // Glyma.07G182300 // Glyma.08G138200 // Glyma.19G124500 // Glyma.08G118400 // Glyma.13G088000 // Glyma.15G127500 // Glyma.19G077300 // Glyma.06G319500 // Glyma.20G007400
GO:0006629	P	lipid metabolic process	9	142	1024	29501	0.061	0.47	// Glyma.05G129900 // Glyma.11G021400 // Glyma.08G138200 // Glyma.11G110000 // Glyma.06G118500 // Glyma.03G092500 // Glyma.13G127400 // Glyma.19G250200 // Glyma.04G058600
GO:0044249	P	cellular biosynthetic process	25	142	3977	29501	0.098	0.73	// Glyma.17G072300 // Glyma.11G102100 // Glyma.08G138200 // Glyma.19G028700 // Glyma.10G155000 // Glyma.17G088900 // Glyma.05G240700 // Glyma.03G088500 // Glyma.05G200500 // Glyma.10G002600 // Glyma.09G248300 // Glyma.11G042400 // Glyma.03G128300 // Glyma.06G040400 // Glyma.11G021400 // Glyma.14G195000 // Glyma.06G118500 // Glyma.08G335300 // Glyma.06G001100 // Glyma.19G142400 // Glyma.05G184000 …
GO:0006807	P	nitrogen compound metabolic process	20	142	3982	29501	0.46	1	// Glyma.19G142400 // Glyma.10G151900 // Glyma.11G102100 // Glyma.07G019900 // Glyma.06G040400 // Glyma.03G088500 // Glyma.05G240700 // Glyma.14G184500 // Glyma.10G155000 // Glyma.03G128300 // Glyma.11G180900 // Glyma.05G200500 // Glyma.07G263100 // Glyma.14G195000 // Glyma.08G007900 // Glyma.06G055100 // Glyma.08G335300 // Glyma.06G001100 // Glyma.05G243600 // Glyma.14G094700
GO:0034645	P	cellular macromolecule biosynthetic process	14	142	3265	29501	0.72	1	// Glyma.17G072300 // Glyma.05G184000 // Glyma.07G263100 // Glyma.11G102100 // Glyma.06G040400 // Glyma.19G028700 // Glyma.10G155000 // Glyma.03G088500 // Glyma.10G002600 // Glyma.08G335300 // Glyma.08G087200 // Glyma.09G248300 // Glyma.06G001100 // Glyma.15G102600
GO:0044267	P	cellular protein metabolic process	15	142	3912	29501	0.86	1	// Glyma.17G072300 // Glyma.05G184000 // Glyma.07G263100 // Glyma.11G102100 // Glyma.14G014800 // Glyma.10G155000 // Glyma.19G028700 // Glyma.05G200500 // Glyma.10G002600 // Glyma.09G248300 // Glyma.08G087200 // Glyma.06G070300 // Glyma.06G001100 // Glyma.11G244700 // Glyma.15G102600
GO:0044262	P	cellular carbohydrate metabolic process	5	142	686	29501	0.24	1	// Glyma.19G124500 // Glyma.19G077300 // Glyma.07G019900 // Glyma.08G138200 // Glyma.20G007400
GO:0044260	P	cellular macromolecule metabolic process	22	142	7345	29501	1	1	// Glyma.17G072300 // Glyma.11G102100 // Glyma.19G028700 // Glyma.10G155000 // Glyma.06G070300 // Glyma.14G014800 // Glyma.05G200500 // Glyma.03G088500 // Glyma.10G002600 // Glyma.09G248300 // Glyma.10G151900 // Glyma.06G040400 // Glyma.08G335300 // Glyma.06G001100 // Glyma.05G243600 // Glyma.11G244700 // Glyma.05G184000 // Glyma.07G263100 // Glyma.07G019900 // Glyma.08G087200 // Glyma.20G007400 …
GO:0010467	P	gene expression	14	142	3161	29501	0.67	1	// Glyma.17G072300 // Glyma.05G184000 // Glyma.07G263100 // Glyma.11G102100 // Glyma.06G040400 // Glyma.19G028700 // Glyma.10G155000 // Glyma.03G088500 // Glyma.10G002600 // Glyma.09G248300 // Glyma.08G087200 // Glyma.06G001100 // Glyma.05G243600 // Glyma.15G102600
GO:0065007	P	biological regulation	6	142	3380	29501	1	1	// Glyma.08G285900 // Glyma.17G164100 // Glyma.06G040400 // Glyma.02G185300 // Glyma.14G064500 // Glyma.18G039500
GO:0006139	P	nucleobase, nucleoside, nucleotide and nucleic acid metabolic process	11	142	3541	29501	0.96	1	// Glyma.10G151900 // Glyma.11G102100 // Glyma.06G040400 // Glyma.10G155000 // Glyma.03G088500 // Glyma.07G263100 // Glyma.08G335300 // Glyma.07G019900 // Glyma.06G001100 // Glyma.05G243600 // Glyma.19G142400
GO:0009987	P	cellular process	54	142	11982	29501	0.76	1	// Glyma.17G072300 // Glyma.11G102100 // Glyma.08G118400 // Glyma.19G077300 // Glyma.08G138200 // Glyma.19G028700 // Glyma.10G155000 // Glyma.03G092500 // Glyma.13G127400 // Glyma.17G088900 // Glyma.20G050800 // Glyma.02G185300 // Glyma.15G055600 // Glyma.14G094700 // Glyma.14G014800 // Glyma.05G240700 // Glyma.05G129900 // Glyma.06G070300 // Glyma.13G349200 // Glyma.15G265300 // Glyma.03G088500 …
GO:0006950	P	response to stress	5	142	1030	29501	0.56	1	// Glyma.08G335300 // Glyma.02G234200 // Glyma.10G151900 // Glyma.09G185500 // Glyma.02G017100
GO:0009059	P	macromolecule biosynthetic process	14	142	3272	29501	0.72	1	// Glyma.17G072300 // Glyma.05G184000 // Glyma.07G263100 // Glyma.11G102100 // Glyma.06G040400 // Glyma.19G028700 // Glyma.10G155000 // Glyma.03G088500 // Glyma.10G002600 // Glyma.08G335300 // Glyma.08G087200 // Glyma.09G248300 // Glyma.06G001100 // Glyma.15G102600
GO:0009056	P	catabolic process	5	142	614	29501	0.18	1	// Glyma.08G118400 // Glyma.14G014800 // Glyma.07G019900 // Glyma.14G094700 // Glyma.20G007400
GO:0016070	P	RNA metabolic process	7	142	2518	29501	0.96	1	// Glyma.07G263100 // Glyma.11G102100 // Glyma.06G040400 // Glyma.10G155000 // Glyma.03G088500 // Glyma.06G001100 // Glyma.05G243600
GO:0044238	P	primary metabolic process	54	142	10398	29501	0.27	1	// Glyma.17G072300 // Glyma.19G142400 // Glyma.11G102100 // Glyma.08G118400 // Glyma.07G182300 // Glyma.08G138200 // Glyma.19G028700 // Glyma.10G155000 // Glyma.03G092500 // Glyma.13G127400 // Glyma.06G070300 // Glyma.05G007200 // Glyma.15G219100 // Glyma.14G014800 // Glyma.05G240700 // Glyma.05G129900 // Glyma.10G106600 // Glyma.03G088500 // Glyma.14G094700 // Glyma.19G124500 // Glyma.05G200500 …
GO:0019538	P	protein metabolic process	23	142	4692	29501	0.5	1	// Glyma.17G072300 // Glyma.11G102100 // Glyma.19G028700 // Glyma.10G155000 // Glyma.06G070300 // Glyma.05G007200 // Glyma.15G219100 // Glyma.14G014800 // Glyma.05G200500 // Glyma.10G002600 // Glyma.09G248300 // Glyma.14G064500 // Glyma.20G100400 // Glyma.18G090900 // Glyma.06G001100 // Glyma.11G244700 // Glyma.05G184000 // Glyma.07G263100 // Glyma.20G199000 // Glyma.17G164100 // Glyma.08G087200 …
GO:0050896	P	response to stimulus	5	142	1227	29501	0.71	1	// Glyma.08G335300 // Glyma.02G234200 // Glyma.10G151900 // Glyma.09G185500 // Glyma.02G017100
GO:0044237	P	cellular metabolic process	44	142	9028	29501	0.49	1	// Glyma.17G072300 // Glyma.11G102100 // Glyma.08G118400 // Glyma.19G077300 // Glyma.08G138200 // Glyma.19G028700 // Glyma.10G155000 // Glyma.03G092500 // Glyma.13G127400 // Glyma.17G088900 // Glyma.20G050800 // Glyma.06G070300 // Glyma.14G094700 // Glyma.14G014800 // Glyma.05G240700 // Glyma.05G129900 // Glyma.03G088500 // Glyma.19G142400 // Glyma.19G124500 // Glyma.05G200500 // Glyma.10G002600 …
GO:0043170	P	macromolecule metabolic process	31	142	8210	29501	0.96	1	// Glyma.17G072300 // Glyma.11G102100 // Glyma.08G118400 // Glyma.19G028700 // Glyma.10G155000 // Glyma.06G070300 // Glyma.05G007200 // Glyma.15G219100 // Glyma.14G014800 // Glyma.03G088500 // Glyma.05G200500 // Glyma.10G002600 // Glyma.09G248300 // Glyma.14G064500 // Glyma.20G100400 // Glyma.10G151900 // Glyma.06G040400 // Glyma.18G090900 // Glyma.08G335300 // Glyma.06G001100 // Glyma.05G243600 …
GO:0050662	F	coenzyme binding	15	142	648	29501	7.5e-07	0.00015	// Glyma.18G155700 // Glyma.05G240700 // Glyma.05G129900 // Glyma.08G118400 // Glyma.19G077300 // Glyma.07G019900 // Glyma.11G110000 // Glyma.12G028300 // Glyma.03G092500 // Glyma.13G127400 // Glyma.02G185300 // Glyma.04G058600 // Glyma.08G017800 // Glyma.07G074700 // Glyma.01G235600
GO:0048037	F	cofactor binding	16	142	827	29501	3.1e-06	0.0003	// Glyma.11G096200 // Glyma.18G155700 // Glyma.05G240700 // Glyma.05G129900 // Glyma.08G118400 // Glyma.19G077300 // Glyma.07G019900 // Glyma.11G110000 // Glyma.12G028300 // Glyma.03G092500 // Glyma.13G127400 // Glyma.02G185300 // Glyma.04G058600 // Glyma.08G017800 // Glyma.07G074700 // Glyma.01G235600
GO:0016616	F	oxidoreductase activity, acting on the CH-OH group of donors, NAD or NADP as acceptor	10	142	407	29501	3.5e-05	0.0018	// Glyma.07G019900 // Glyma.05G129900 // Glyma.19G077300 // Glyma.11G110000 // Glyma.12G028300 // Glyma.03G092500 // Glyma.13G127400 // Glyma.04G058600 // Glyma.07G074700 // Glyma.10G058100
GO:0016491	F	oxidoreductase activity	29	142	2744	29501	4.6e-05	0.0018	// Glyma.19G077300 // Glyma.04G190800 // Glyma.03G092500 // Glyma.13G127400 // Glyma.20G050800 // Glyma.15G026400 // Glyma.14G094700 // Glyma.05G240700 // Glyma.02G076500 // Glyma.05G129900 // Glyma.12G222200 // Glyma.02G234200 // Glyma.07G007000 // Glyma.02G185300 // Glyma.03G128300 // Glyma.08G285900 // Glyma.18G155700 // Glyma.03G168700 // Glyma.11G253000 // Glyma.12G028300 // Glyma.08G017800 …
GO:0003824	F	catalytic activity	91	142	13905	29501	3.7e-05	0.0018	// Glyma.07G182300 // Glyma.03G092500 // Glyma.05G007200 // Glyma.15G026400 // Glyma.14G094700 // Glyma.02G076500 // Glyma.10G106600 // Glyma.19G124500 // Glyma.03G128300 // Glyma.01G225200 // Glyma.07G214700 // Glyma.01G235600 // Glyma.06G001100 // Glyma.13G152500 // Glyma.15G158800 // Glyma.08G047100 // Glyma.15G127500 // Glyma.03G219500 // Glyma.11G102100 // Glyma.08G118400 // Glyma.10G155000 …
GO:0016614	F	oxidoreductase activity, acting on CH-OH group of donors	10	142	437	29501	6.2e-05	0.0021	// Glyma.07G019900 // Glyma.05G129900 // Glyma.19G077300 // Glyma.11G110000 // Glyma.12G028300 // Glyma.03G092500 // Glyma.13G127400 // Glyma.04G058600 // Glyma.07G074700 // Glyma.10G058100
GO:0003854	F	3-beta-hydroxy-delta5-steroid dehydrogenase activity	5	142	146	29501	0.00082	0.018	// Glyma.03G092500 // Glyma.13G127400 // Glyma.11G110000 // Glyma.05G129900 // Glyma.04G058600
GO:0033764	F	steroid dehydrogenase activity, acting on the CH-OH group of donors, NAD or NADP as acceptor	5	142	146	29501	0.00082	0.018	// Glyma.03G092500 // Glyma.13G127400 // Glyma.11G110000 // Glyma.05G129900 // Glyma.04G058600
GO:0016229	F	steroid dehydrogenase activity	5	142	146	29501	0.00082	0.018	// Glyma.03G092500 // Glyma.13G127400 // Glyma.11G110000 // Glyma.05G129900 // Glyma.04G058600
GO:0016874	F	ligase activity	10	142	654	29501	0.0014	0.028	// Glyma.19G139300 // Glyma.08G047100 // Glyma.07G263100 // Glyma.11G102100 // Glyma.05G221100 // Glyma.10G155000 // Glyma.13G328600 // Glyma.14G195000 // Glyma.06G001100 // Glyma.19G142400
GO:0016787	F	hydrolase activity	36	142	4588	29501	0.0018	0.032	// Glyma.05G056300 // Glyma.08G118400 // Glyma.07G182300 // Glyma.13G106200 // Glyma.07G125900 // Glyma.05G007200 // Glyma.06G176900 // Glyma.15G219100 // Glyma.05G209200 // Glyma.15G158800 // Glyma.14G014800 // Glyma.10G106600 // Glyma.19G124500 // Glyma.13G088000 // Glyma.14G064500 // Glyma.17G018200 // Glyma.08G200200 // Glyma.20G100400 // Glyma.10G151900 // Glyma.05G055500 // Glyma.18G090900 …
GO:0003723	F	RNA binding	8	142	486	29501	0.0027	0.044	// Glyma.16G036100 // Glyma.01G153400 // Glyma.18G004100 // Glyma.08G097700 // Glyma.06G142400 // Glyma.19G246200 // Glyma.09G230800 // Glyma.03G160000
GO:0017171	F	serine hydrolase activity	6	142	330	29501	0.0057	0.081	// Glyma.20G199000 // Glyma.17G164100 // Glyma.03G219500 // Glyma.14G064500 // Glyma.05G007200 // Glyma.20G100400
GO:0008236	F	serine-type peptidase activity	6	142	330	29501	0.0057	0.081	// Glyma.20G199000 // Glyma.17G164100 // Glyma.03G219500 // Glyma.14G064500 // Glyma.05G007200 // Glyma.20G100400
GO:0070011	F	peptidase activity, acting on L-amino acid peptides	10	142	834	29501	0.0076	0.1	// Glyma.14G014800 // Glyma.20G199000 // Glyma.17G164100 // Glyma.18G090900 // Glyma.03G219500 // Glyma.14G064500 // Glyma.05G007200 // Glyma.15G219100 // Glyma.05G209200 // Glyma.20G100400
GO:0008233	F	peptidase activity	10	142	871	29501	0.01	0.12	// Glyma.14G014800 // Glyma.20G199000 // Glyma.17G164100 // Glyma.18G090900 // Glyma.03G219500 // Glyma.14G064500 // Glyma.05G007200 // Glyma.15G219100 // Glyma.05G209200 // Glyma.20G100400
GO:0004175	F	endopeptidase activity	7	142	526	29501	0.015	0.17	// Glyma.14G014800 // Glyma.17G164100 // Glyma.18G090900 // Glyma.14G064500 // Glyma.05G007200 // Glyma.15G219100 // Glyma.20G100400
GO:0004553	F	hydrolase activity, hydrolyzing O-glycosyl compounds	8	142	726	29501	0.025	0.28	// Glyma.05G056300 // Glyma.12G021300 // Glyma.10G106600 // Glyma.15G127500 // Glyma.19G124500 // Glyma.08G118400 // Glyma.13G088000 // Glyma.06G319500
GO:0016798	F	hydrolase activity, acting on glycosyl bonds	8	142	759	29501	0.032	0.33	// Glyma.05G056300 // Glyma.12G021300 // Glyma.10G106600 // Glyma.15G127500 // Glyma.19G124500 // Glyma.08G118400 // Glyma.13G088000 // Glyma.06G319500
GO:0005198	F	structural molecule activity	7	142	626	29501	0.033	0.33	// Glyma.05G184000 // Glyma.19G028700 // Glyma.09G111700 // Glyma.10G002600 // Glyma.08G087200 // Glyma.08G185800 // Glyma.15G102600
GO:0016879	F	ligase activity, forming carbon-nitrogen bonds	5	142	507	29501	0.1	0.95	// Glyma.08G047100 // Glyma.13G328600 // Glyma.05G221100 // Glyma.19G142400 // Glyma.14G195000
GO:0000166	F	nucleotide binding	25	142	5459	29501	0.64	1	// Glyma.07G252100 // Glyma.11G102100 // Glyma.19G077300 // Glyma.10G155000 // Glyma.13G106200 // Glyma.06G176900 // Glyma.05G240700 // Glyma.11G244700 // Glyma.02G185300 // Glyma.15G158800 // Glyma.10G151900 // Glyma.18G155700 // Glyma.12G028300 // Glyma.13G328600 // Glyma.08G335300 // Glyma.08G017800 // Glyma.01G235600 // Glyma.06G001100 // Glyma.19G142400 // Glyma.07G263100 // Glyma.07G019900 …
GO:0016740	F	transferase activity	11	142	4916	29501	1	1	// Glyma.11G096200 // Glyma.06G118500 // Glyma.14G184500 // Glyma.08G007900 // Glyma.07G214700 // Glyma.05G200500 // Glyma.03G088500 // Glyma.10G215400 // Glyma.13G152500 // Glyma.20G007400 // Glyma.14G210700
GO:0046872	F	metal ion binding	10	142	3600	29501	0.98	1	// Glyma.05G209200 // Glyma.02G234200 // Glyma.03G168700 // Glyma.07G007000 // Glyma.17G088900 // Glyma.20G050800 // Glyma.14G001200 // Glyma.11G226400 // Glyma.15G026400 // Glyma.18G039500
GO:0004386	F	helicase activity	5	142	668	29501	0.22	1	// Glyma.13G106200 // Glyma.15G158800 // Glyma.10G151900 // Glyma.08G335300 // Glyma.07G252100
GO:0016818	F	hydrolase activity, acting on acid anhydrides, in phosphorus-containing anhydrides	8	142	1469	29501	0.41	1	// Glyma.10G151900 // Glyma.07G252100 // Glyma.13G106200 // Glyma.08G335300 // Glyma.05G055500 // Glyma.04G206300 // Glyma.15G158800 // Glyma.06G176900
GO:0016817	F	hydrolase activity, acting on acid anhydrides	8	142	1480	29501	0.42	1	// Glyma.10G151900 // Glyma.07G252100 // Glyma.13G106200 // Glyma.08G335300 // Glyma.05G055500 // Glyma.04G206300 // Glyma.15G158800 // Glyma.06G176900
GO:0005488	F	binding	71	142	17591	29501	0.99	1	// Glyma.17G072300 // Glyma.11G096200 // Glyma.07G252100 // Glyma.11G102100 // Glyma.18G133400 // Glyma.08G118400 // Glyma.08G097700 // Glyma.10G155000 // Glyma.03G092500 // Glyma.13G127400 // Glyma.17G088900 // Glyma.08G128300 // Glyma.20G050800 // Glyma.14G001200 // Glyma.09G230800 // Glyma.01G159500 // Glyma.05G007200 // Glyma.06G176900 // Glyma.15G026400 // Glyma.03G160000 // Glyma.05G209200 …
GO:0003676	F	nucleic acid binding	19	142	3997	29501	0.56	1	// Glyma.17G072300 // Glyma.16G036100 // Glyma.01G153400 // Glyma.11G102100 // Glyma.18G004100 // Glyma.06G040400 // Glyma.08G097700 // Glyma.07G252100 // Glyma.06G142400 // Glyma.13G106200 // Glyma.19G246200 // Glyma.09G248300 // Glyma.13G238200 // Glyma.18G133400 // Glyma.09G230800 // Glyma.06G001100 // Glyma.11G117500 // Glyma.03G160000 // Glyma.15G158800
GO:0017076	F	purine nucleotide binding	19	142	5181	29501	0.93	1	// Glyma.07G252100 // Glyma.10G151900 // Glyma.11G102100 // Glyma.08G017800 // Glyma.05G221100 // Glyma.02G185300 // Glyma.10G155000 // Glyma.19G142400 // Glyma.12G028300 // Glyma.13G106200 // Glyma.13G328600 // Glyma.08G335300 // Glyma.05G055500 // Glyma.07G263100 // Glyma.04G206300 // Glyma.06G001100 // Glyma.06G176900 // Glyma.11G244700 // Glyma.15G158800
GO:0005524	F	ATP binding	12	142	3990	29501	0.98	1	// Glyma.10G151900 // Glyma.11G102100 // Glyma.05G221100 // Glyma.10G155000 // Glyma.07G252100 // Glyma.13G106200 // Glyma.13G328600 // Glyma.08G335300 // Glyma.07G263100 // Glyma.06G001100 // Glyma.11G244700 // Glyma.15G158800
GO:0016788	F	hydrolase activity, acting on ester bonds	6	142	1054	29501	0.4	1	// Glyma.07G263100 // Glyma.08G200000 // Glyma.07G182300 // Glyma.19G250200 // Glyma.07G125900 // Glyma.08G200200
GO:0046914	F	transition metal ion binding	5	142	2454	29501	0.99	1	// Glyma.02G234200 // Glyma.11G226400 // Glyma.17G088900 // Glyma.03G168700 // Glyma.05G209200
GO:0016462	F	pyrophosphatase activity	8	142	1440	29501	0.39	1	// Glyma.10G151900 // Glyma.07G252100 // Glyma.13G106200 // Glyma.08G335300 // Glyma.05G055500 // Glyma.04G206300 // Glyma.15G158800 // Glyma.06G176900
GO:0032559	F	adenyl ribonucleotide binding	12	142	4442	29501	0.99	1	// Glyma.10G151900 // Glyma.11G102100 // Glyma.05G221100 // Glyma.10G155000 // Glyma.07G252100 // Glyma.13G106200 // Glyma.13G328600 // Glyma.08G335300 // Glyma.07G263100 // Glyma.06G001100 // Glyma.11G244700 // Glyma.15G158800
GO:0032555	F	purine ribonucleotide binding	16	142	4867	29501	0.97	1	// Glyma.07G252100 // Glyma.10G151900 // Glyma.11G102100 // Glyma.05G221100 // Glyma.10G155000 // Glyma.19G142400 // Glyma.13G106200 // Glyma.13G328600 // Glyma.08G335300 // Glyma.05G055500 // Glyma.07G263100 // Glyma.04G206300 // Glyma.06G001100 // Glyma.06G176900 // Glyma.11G244700 // Glyma.15G158800
GO:0032553	F	ribonucleotide binding	16	142	4867	29501	0.97	1	// Glyma.07G252100 // Glyma.10G151900 // Glyma.11G102100 // Glyma.05G221100 // Glyma.10G155000 // Glyma.19G142400 // Glyma.13G106200 // Glyma.13G328600 // Glyma.08G335300 // Glyma.05G055500 // Glyma.07G263100 // Glyma.04G206300 // Glyma.06G001100 // Glyma.06G176900 // Glyma.11G244700 // Glyma.15G158800
GO:0043169	F	cation binding	10	142	3612	29501	0.98	1	// Glyma.05G209200 // Glyma.02G234200 // Glyma.03G168700 // Glyma.07G007000 // Glyma.17G088900 // Glyma.20G050800 // Glyma.14G001200 // Glyma.11G226400 // Glyma.15G026400 // Glyma.18G039500
GO:0043167	F	ion binding	10	142	3615	29501	0.98	1	// Glyma.05G209200 // Glyma.02G234200 // Glyma.03G168700 // Glyma.07G007000 // Glyma.17G088900 // Glyma.20G050800 // Glyma.14G001200 // Glyma.11G226400 // Glyma.15G026400 // Glyma.18G039500
GO:0030554	F	adenyl nucleotide binding	15	142	4745	29501	0.98	1	// Glyma.10G151900 // Glyma.11G102100 // Glyma.05G221100 // Glyma.02G185300 // Glyma.10G155000 // Glyma.07G252100 // Glyma.12G028300 // Glyma.13G106200 // Glyma.13G328600 // Glyma.08G335300 // Glyma.08G017800 // Glyma.07G263100 // Glyma.06G001100 // Glyma.11G244700 // Glyma.15G158800
GO:0005515	F	protein binding	16	142	6255	29501	1	1	// Glyma.08G196300 // Glyma.05G240700 // Glyma.20G199000 // Glyma.17G164100 // Glyma.14G199000 // Glyma.09G167100 // Glyma.07G007000 // Glyma.19G174700 // Glyma.11G118300 // Glyma.08G128300 // Glyma.20G031600 // Glyma.14G064500 // Glyma.01G159500 // Glyma.05G007200 // Glyma.15G026400 // Glyma.01G244600
GO:0001883	F	purine nucleoside binding	15	142	4745	29501	0.98	1	// Glyma.10G151900 // Glyma.11G102100 // Glyma.05G221100 // Glyma.02G185300 // Glyma.10G155000 // Glyma.07G252100 // Glyma.12G028300 // Glyma.13G106200 // Glyma.13G328600 // Glyma.08G335300 // Glyma.08G017800 // Glyma.07G263100 // Glyma.06G001100 // Glyma.11G244700 // Glyma.15G158800
GO:0001882	F	nucleoside binding	15	142	4747	29501	0.98	1	// Glyma.10G151900 // Glyma.11G102100 // Glyma.05G221100 // Glyma.02G185300 // Glyma.10G155000 // Glyma.07G252100 // Glyma.12G028300 // Glyma.13G106200 // Glyma.13G328600 // Glyma.08G335300 // Glyma.08G017800 // Glyma.07G263100 // Glyma.06G001100 // Glyma.11G244700 // Glyma.15G158800
GO:0003735	F	structural constituent of ribosome	5	142	532	29501	0.12	1	// Glyma.19G028700 // Glyma.05G184000 // Glyma.10G002600 // Glyma.08G087200 // Glyma.15G102600
GO:0017111	F	nucleoside-triphosphatase activity	8	142	1412	29501	0.37	1	// Glyma.10G151900 // Glyma.07G252100 // Glyma.13G106200 // Glyma.08G335300 // Glyma.05G055500 // Glyma.04G206300 // Glyma.15G158800 // Glyma.06G176900
GO:0005737	C	cytoplasm	15	142	1539	29501	0.0077	0.42	// Glyma.05G184000 // Glyma.14G206700 // Glyma.14G199000 // Glyma.19G028700 // Glyma.10G155000 // Glyma.09G111700 // Glyma.05G200500 // Glyma.10G002600 // Glyma.09G248300 // Glyma.08G087200 // Glyma.08G185800 // Glyma.05G240700 // Glyma.15G102600 // Glyma.20G007400 // Glyma.13G238200
GO:0030529	C	ribonucleoprotein complex	5	142	580	29501	0.15	1	// Glyma.19G028700 // Glyma.05G184000 // Glyma.10G002600 // Glyma.08G087200 // Glyma.15G102600
GO:0016020	C	membrane	7	142	3518	29501	1	1	// Glyma.12G172500 // Glyma.14G206700 // Glyma.15G265300 // Glyma.06G118500 // Glyma.15G055600 // Glyma.13G338700 // Glyma.11G133800
GO:0043231	C	intracellular membrane-bounded organelle	5	142	1789	29501	0.94	1	// Glyma.15G265300 // Glyma.13G349200 // Glyma.14G206700 // Glyma.08G185800 // Glyma.09G111700
GO:0044424	C	intracellular part	18	142	3337	29501	0.34	1	// Glyma.05G184000 // Glyma.20G007400 // Glyma.14G206700 // Glyma.13G349200 // Glyma.15G265300 // Glyma.14G014800 // Glyma.10G155000 // Glyma.09G111700 // Glyma.05G200500 // Glyma.10G002600 // Glyma.09G248300 // Glyma.08G087200 // Glyma.08G185800 // Glyma.19G028700 // Glyma.05G240700 // Glyma.15G102600 // Glyma.14G199000 // Glyma.13G238200
GO:0043232	C	intracellular non-membrane-bounded organelle	5	142	741	29501	0.29	1	// Glyma.19G028700 // Glyma.05G184000 // Glyma.10G002600 // Glyma.08G087200 // Glyma.15G102600
GO:0043229	C	intracellular organelle	10	142	2514	29501	0.78	1	// Glyma.05G184000 // Glyma.14G206700 // Glyma.13G349200 // Glyma.15G265300 // Glyma.19G028700 // Glyma.09G111700 // Glyma.10G002600 // Glyma.08G087200 // Glyma.08G185800 // Glyma.15G102600
GO:0005622	C	intracellular	19	142	3706	29501	0.42	1	// Glyma.01G153400 // Glyma.20G007400 // Glyma.14G206700 // Glyma.13G349200 // Glyma.14G014800 // Glyma.15G265300 // Glyma.05G184000 // Glyma.10G155000 // Glyma.09G111700 // Glyma.05G200500 // Glyma.10G002600 // Glyma.09G248300 // Glyma.08G087200 // Glyma.08G185800 // Glyma.19G028700 // Glyma.05G240700 // Glyma.15G102600 // Glyma.14G199000 // Glyma.13G238200
GO:0043227	C	membrane-bounded organelle	5	142	1798	29501	0.94	1	// Glyma.15G265300 // Glyma.13G349200 // Glyma.14G206700 // Glyma.08G185800 // Glyma.09G111700
GO:0043226	C	organelle	10	142	2514	29501	0.78	1	// Glyma.05G184000 // Glyma.14G206700 // Glyma.13G349200 // Glyma.15G265300 // Glyma.19G028700 // Glyma.09G111700 // Glyma.10G002600 // Glyma.08G087200 // Glyma.08G185800 // Glyma.15G102600
GO:0005840	C	ribosome	5	142	532	29501	0.12	1	// Glyma.19G028700 // Glyma.05G184000 // Glyma.10G002600 // Glyma.08G087200 // Glyma.15G102600
GO:0044444	C	cytoplasmic part	10	142	1156	29501	0.054	1	// Glyma.05G184000 // Glyma.14G206700 // Glyma.19G028700 // Glyma.09G111700 // Glyma.10G002600 // Glyma.08G087200 // Glyma.08G185800 // Glyma.15G102600 // Glyma.20G007400 // Glyma.13G238200
GO:0032991	C	macromolecular complex	9	142	1849	29501	0.54	1	// Glyma.05G184000 // Glyma.15G265300 // Glyma.14G014800 // Glyma.19G028700 // Glyma.10G002600 // Glyma.08G087200 // Glyma.15G102600 // Glyma.20G007400 // Glyma.13G238200
GO:0044464	C	cell part	24	142	6957	29501	0.98	1	// Glyma.15G055600 // Glyma.19G028700 // Glyma.10G155000 // Glyma.12G172500 // Glyma.05G240700 // Glyma.13G349200 // Glyma.15G265300 // Glyma.05G200500 // Glyma.10G002600 // Glyma.09G248300 // Glyma.08G185800 // Glyma.11G133800 // Glyma.01G153400 // Glyma.06G118500 // Glyma.13G238200 // Glyma.05G184000 // Glyma.14G206700 // Glyma.14G199000 // Glyma.14G014800 // Glyma.09G111700 // Glyma.08G087200 …
GO:0005623	C	cell	24	142	6957	29501	0.98	1	// Glyma.15G055600 // Glyma.19G028700 // Glyma.10G155000 // Glyma.12G172500 // Glyma.05G240700 // Glyma.13G349200 // Glyma.15G265300 // Glyma.05G200500 // Glyma.10G002600 // Glyma.09G248300 // Glyma.08G185800 // Glyma.11G133800 // Glyma.01G153400 // Glyma.06G118500 // Glyma.13G238200 // Glyma.05G184000 // Glyma.14G206700 // Glyma.14G199000 // Glyma.14G014800 // Glyma.09G111700 // Glyma.08G087200 …
GO:0043228	C	non-membrane-bounded organelle	5	142	741	29501	0.29	1	// Glyma.19G028700 // Glyma.05G184000 // Glyma.10G002600 // Glyma.08G087200 // Glyma.15G102600
