# Supplementary material for: Galactolipid and Phospholipid Profile and Proteome Alterations in Soybean Leaves at the Onset of Salt Stress
Source: Front Plant Sci. 2021 Mar 17;12:644408. doi: 10.3389/fpls.2021.644408 (PMC8010258; doi:10.3389/fpls.2021.644408)
Supplement: Supplementary file 6 [file Table_8.xlsx]

## Sheet: Sheet2
Supplementary Table S8
Differentially expressed proteins shown in Figures 4, 5 and 6
AccessionID	Protein name	Description	Abundance Ratio: (0_5h) / (0h)	Abundance Ratio: (1h) / (0h)	Abundance Ratio: (2h) / (0h)	Abundance Ratio Adj. P-Value: (0_5h) / (0h)	Abundance Ratio Adj. P-Value: (1h) / (0h)	Abundance Ratio Adj. P-Value: (2h) / (0h)	subcelluar localisation	subcelluar_score	subcelluar_des
Figure 4
Glyma.02G173600.1.p	Fibrillin	PF04755 - PAP_fibrillin (PAP_fibrillin) (1 of 23)	1.119	0.593	0.738	1	1	1	Chloroplast	9.1
Glyma.09G111700.1.p	Fibrillin	PF04755 - PAP_fibrillin (PAP_fibrillin) (1 of 23)	2.166	2.027	2.153	0.0246194	0.0201023	0.00833554	Chloroplast	9.4
Glyma.20G207100.1.p	Fibrillin	PF04755 - PAP_fibrillin (PAP_fibrillin) (1 of 23)	1.015	0.802	0.338	1	1	0.827736	Chloroplast	9.3
Glyma.U015600.1.p	Fibrillin	PF04755 - PAP_fibrillin (PAP_fibrillin) (1 of 23)	1.211	1.593	1.042	1	0.84872	1	Extracellular (Secreted)	2.6	The protein is possibly multilocated: Cytoplasm_and_Chloroplast due to SBLAST search in MultiLocDB
Glyma.01G015100.1.p	PAP	PTHR31906:SF5 - PLASTID-LIPID-ASSOCIATED PROTEIN 3, CHLOROPLASTIC-RELATED (1 of 3)	1.371	1.463	0.769	1	1	1	Membrane bound Chloroplast	9.4
Glyma.15G112500.1.p	PAP	PTHR31906:SF5 - PLASTID-LIPID-ASSOCIATED PROTEIN 3, CHLOROPLASTIC-RELATED (1 of 3)	3.837	4.691	8.025	0.0331743	0.0124504	0.00362904	Membrane bound Chloroplast	9.3
Glyma.09G008100.1.p	PAP	PTHR31906:SF5 - PLASTID-LIPID-ASSOCIATED PROTEIN 3, CHLOROPLASTIC-RELATED (1 of 3)	1.408	1.643	2.273	1	1	1	Membrane bound Chloroplast	9.3
Glyma.10G291100.1.p	DHAR3	PTHR11260:SF171 - GLUTATHIONE S-TRANSFERASE DHAR3, CHLOROPLASTIC (1 of 4)	2.84	3.619	2.97	0.0880023	0.0124504	0.0369431	Membrane bound Chloroplast	7.8
Glyma.07G073700.1.p	KEA1	PTHR16254:SF13 - K(+) EFFLUX ANTIPORTER 1, CHLOROPLASTIC-RELATED (1 of 4)	3.244	2.044	1.428	0.0067601	0.0694521	0.473788	Membrane bound Chloroplast	9.5
Glyma.11G130200.1.p	Linoleate 13S-lipoxygenase	PTHR11771:SF42 - PROTEIN C13C4.7 (1 of 8)	0.53	0.01	0.01	0.498176	NA	NA	Membrane bound Chloroplast	5.5	The protein is possibly multilocated: Cytoplasm_and_Chloroplast due to SBLAST search in MultiLocDB
Glyma.12G054700.1.p	Linoleate 13S-lipoxygenase	PTHR11771:SF42 - PROTEIN C13C4.7 (1 of 8)	0.989	0.32	0.01	1	0.0245354	NA	Membrane bound Chloroplast	5.5	The protein is possibly multilocated: Cytoplasm_and_Chloroplast due to SBLAST search in MultiLocDB
Glyma.20G054000.1.p	Linoleate 13S-lipoxygenase	PTHR11771:SF42 - PROTEIN C13C4.7 (1 of 8)	0.809	0.548	1.012	1	0.62811	1	Cytoplasmic	3.9	The protein is possibly multilocated: Cytoplasm_and_Chloroplast due to SBLAST search in MultiLocDB
Glyma.18G280900.1.p	Allene oxide cyclase (AOC)	K10525 - allene oxide cyclase (AOC) (1 of 6)	0.834	0.945	1.238	1	1	0.595123	Membrane bound Chloroplast	9.5
Glyma.13G047300.1.p	Allene oxide cyclase (AOC)	K10525 - allene oxide cyclase (AOC) (1 of 6)	100	100	100				Membrane bound Chloroplast	9.6
Glyma.12G191400.1.p	Allene oxide synthase (AOS)	K10528 - hydroperoxide lyase (HPL) (1 of 1)	0.927	0.603	0.501	1	0.475378	0.129968	Cytoplasmic	3.3
Glyma.11G122700.1.p	Allene oxide synthase (AOS)	K01723 - hydroperoxide dehydratase (AOS) (1 of 4)	0.63	0.155	0.01	1	0.0301603	NA	Cytoplasmic	3.4
Glyma.13G109700.2.p	OPR3	PTHR22893:SF67 - 12-OXOPHYTODIENOATE REDUCTASE 3 (1 of 4)	0.964	0.505	0.01	1	0.115051	NA	Cytoplasmic	4
Glyma.07G180100.1.p	Beta-ketothiolase	2.3.1.16 - Acetyl-CoA C-acyltransferase / Beta-ketothiolase (1 of 4)	1.286	0.356	0.01	1	0.160476	NA	Membrane bound Peroxisomal	8.3
Glyma.10G124700.1.p	Beta-ketothiolase	2.3.1.16 - Acetyl-CoA C-acyltransferase / Beta-ketothiolase (1 of 4)	0.817	0.527	1.493	1	0.926671	0.883389	Membrane bound Peroxisomal	9.4
Glyma.09G248900.1.p	Biotin Carboxyl Carrier Protein (AccB)	PTHR23151:SF66 - BIOTIN CARBOXYL CARRIER PROTEIN OF ACETYL-COA CARBOXYLASE 1, CHLOROPLASTIC (1 of 2)	0.919	1.799	2.908	1	1	0.61286	Chloroplast	9.3
Glyma.18G243500.1.p	Biotin Carboxyl Carrier Protein (AccB)	PTHR23151:SF66 - BIOTIN CARBOXYL CARRIER PROTEIN OF ACETYL-COA CARBOXYLASE 1, CHLOROPLASTIC (1 of 2)	0.753	1.225	2.352	1	1	0.714198	Chloroplast	9.1
Glyma.13G112700.2.p	3-oxoacyl-ACPsynthase II	2.3.1.179 - Beta-ketoacyl-[acyl-carrier-protein] synthase II / KASII (1 of 3)	1.366	3.747	2.041	1	1	1	Membrane bound Chloroplast	5.2
Glyma.09G277400.1.p	3-Oxoacyl-ACP synthase III (FabH)	K00648 - 3-oxoacyl- (fabH) (1 of 2)	0.996	1.573	2.696	1	1	0.341854	Membrane bound Chloroplast	9.2
Glyma.11G101400.1.p	Enoyl-ACP reductase I (FabI)	K00208 - enoyl- (fabI) (1 of 4)	1	0.95	0.941	1	1	1	Membrane bound Chloroplast	9.3
Glyma.12G027300.1.p	Enoyl-ACP reductase I (FabI)	K00208 - enoyl- (fabI) (1 of 4)	1.655	1.816	1.868	1	1	1	Membrane bound Chloroplast	9.1
Glyma.05G129600.1.p	3-Oxoacyl-ACP synase I (FabB)	PTHR11712:SF226 - 3-OXOACYL-[ACYL-CARRIER-PROTEIN] SYNTHASE I, CHLOROPLASTIC (1 of 2)	1.491	1.581	0.679	1	0.976325	1	Membrane bound Chloroplast	5.1
Glyma.08G084300.1.p	3-Oxoacyl-ACP synase I (FabB)	PTHR11712:SF226 - 3-OXOACYL-[ACYL-CARRIER-PROTEIN] SYNTHASE I, CHLOROPLASTIC (1 of 2)	0.992	0.887	0.823	1	1	1	Membrane bound Chloroplast	5
Glyma.15G052500.1.p	β -Hydroxyacyl-ACP dehydratase (FabZ)	K02372 - 3-hydroxyacyl- (fabZ) (1 of 1)	1.081	0.894	1.417	1	1	0.55944	Extracellular (Secreted)	2.5
Glyma.08G349200.1.p	Oleoyl-ACP thioesterase	PTHR31727:SF6 - OLEOYL-ACYL CARRIER PROTEIN THIOESTERASE 2, CHLOROPLASTIC (1 of 2)	0.894	1.681	3.25	1	0.828	0.248684	Chloroplast	9.3
Glyma.07G207200.1.p	stearoyl-ACP desaturase	PTHR31155:SF9 - ACYL-[ACYL-CARRIER-PROTEIN] DESATURASE 7, CHLOROPLASTIC (1 of 2)	1.801	1.339	2.131	1	1	0.436644	Chloroplast	9.3
Figure 5
Glyma.14G186900.2.p	PDH E1	PTHR11624:SF56 - PYRUVATE DEHYDROGENASE E1 COMPONENT SUBUNIT BETA, MITOCHONDRIAL (1 of 3)	3.042	1.96	0.727	0.00689509	0.0583749	0.342017	Mitochondrial	9	The protein is possibly multilocated: Cytoplasm_and_Chloroplast due to SBLAST search in MultiLocDB
Glyma.06G231500.1.p	Malate dehydrogenase	K00026 - malate dehydrogenase (MDH2) (1 of 7)	0.01	0.01	5.557	NA	NA	0.148729	Mitochondrial	4.5	The protein is possibly multilocated: Cytoplasm_and_Peroxisome_and_Mitochondria due to SBLAST search in MultiLocDB
Glyma.12G159300.1.p	Malate dehydrogenase	K00026 - malate dehydrogenase (MDH2) (1 of 7)	1.019	0.991	1.514	1	1	0.664242	Mitochondrial	4.7	The protein is possibly multilocated: Cytoplasm_and_Peroxisome_and_Mitochondria due to SBLAST search in MultiLocDB
Glyma.13G144900.1.p	Isocitrate dehydrogenase	1.1.1.41 - Isocitrate dehydrogenase (NAD(+)) / Nicotinamide adenine dinucleotide isocitrate dehydrogenase (1 of 6)	0.991	0.648	18.159	1	1	0.98018	Mitochondrial	5.2
Glyma.14G001900.1.p	Isocitrate dehydrogenase	1.1.1.41 - Isocitrate dehydrogenase (NAD(+)) / Nicotinamide adenine dinucleotide isocitrate dehydrogenase (1 of 6)	1.029	1.122	0.563	1	1	0.394381	Mitochondrial	5.9
Glyma.10G058100.1.p	Isocitrate dehydrogenase	1.1.1.41 - Isocitrate dehydrogenase (NAD(+)) / Nicotinamide adenine dinucleotide isocitrate dehydrogenase (1 of 6)	23.141	15.208	7.861	0.00096361	0.00135581	0.00356161	Mitochondrial	5.2
Glyma.02G042100.1.p	Isocitrate dehydrogenase	1.1.1.41 - Isocitrate dehydrogenase (NAD(+)) / Nicotinamide adenine dinucleotide isocitrate dehydrogenase (1 of 6)	0.745	0.687	0.645	1	0.740048	0.563926	Mitochondrial	5.9
Glyma.07G124500.1.p	Isocitrate dehydrogenase	PTHR19443//PTHR19443:SF26 - HEXOKINASE // SUBFAMILY NOT NAMED (1 of 7)	5.701	2.376	1.457	0.00161442	0.0565955	0.387617	Mitochondrial	4	The protein is possibly multilocated: Nucleus_and_Mitochondria due to SBLAST search in MultiLocDB
Glyma.09G164900.1.p	Hexokinase	K01899 - succinyl-CoA synthetase alpha subunit (LSC1) (1 of 2)	0.876	1.173	0.61	1	1	1	Mitochondrial	9.8	The protein is possibly multilocated: Nucleus_and_Mitochondria due to SBLAST search in MultiLocDB
Glyma.10G039000.1.p	Succinyl-CoA synthetase	K01900 - succinyl-CoA synthetase beta subunit (LSC2) (1 of 2)	1.194	1.457	1.778	1	0.62122	0.44135	Mitochondrial	9.4	The protein is possibly multilocated: Nucleus_and_Mitochondria due to SBLAST search in MultiLocDB
Glyma.13G125400.1.p	Succinyl-CoA synthetase	K01900 - succinyl-CoA synthetase beta subunit (LSC2) (1 of 2)	1.015	0.862	0.677	1	1	0.933871	Mitochondrial	9.8	The protein is possibly multilocated: Nucleus_and_Mitochondria due to SBLAST search in MultiLocDB
Glyma.16G213200.1.p	Succinyl-CoA synthetase	K01899 - succinyl-CoA synthetase alpha subunit (LSC1) (1 of 2)	1.459	0.502	0.436	1	1	1	Mitochondrial	9.8	The protein is possibly multilocated: Nucleus_and_Mitochondria due to SBLAST search in MultiLocDB
Glyma.19G080600.1.p	Succinyl-CoA synthetase	1.3.5.1//1.3.99.1 - Succinate dehydrogenase (quinone) / Succinic dehydrogenase (1 of 1)	0.538	0.86	1.738	0.667755	1	1	Mitochondrial	9.8
Glyma.02G094300.1.p	Succinate dehydrogenase	K00164 - 2-oxoglutarate dehydrogenase E1 component (OGDH, sucA) (1 of 3)	0.953	0.64	0.708	1	0.658856	1	Mitochondrial	8.3	The protein is possibly multilocated: Nucleus_and_Mitochondria due to SBLAST search in MultiLocDB
Glyma.02G015700.1.p	Fumarate hydratase	K01679 - fumarate hydratase, class II (E4.2.1.2B, fumC) (1 of 3)	1.135	0.994	1.244	1	1	1	Mitochondrial	8.4	The protein is possibly multilocated: Cytoplasm_and_Mitochondria due to SBLAST search in MultiLocDB
Glyma.12G193800.1.p	Aconitate hydratase	K01681 - aconitate hydratase (ACO, acnA) (1 of 6)	0.73	0.01	0.989	0.0441796		1	Cytoplasmic	5.4	The protein is possibly multilocated: Cytoplasm_and_Mitochondria due to SBLAST search in MultiLocDB
Glyma.01G162800.1.p	Aconitate hydratase	K01681 - aconitate hydratase (ACO, acnA) (1 of 6)	0.731	0.55	0.248	1	1	0.446575	Mitochondrial	3.5	The protein is possibly multilocated: Cytoplasm_and_Mitochondria due to SBLAST search in MultiLocDB
Glyma.06G305700.1.p	Aconitate hydratase	K01681 - aconitate hydratase (ACO, acnA) (1 of 6)	0.99	1.774	4.492	1	1	0.108963	Cytoplasmic	5.4	The protein is possibly multilocated: Cytoplasm_and_Mitochondria due to SBLAST search in MultiLocDB
Glyma.16G204600.1.p	Enolase	PTHR11902//PTHR11902:SF18 - ENOLASE // SUBFAMILY NOT NAMED (1 of 4)	4.088	0.01	4.185	0.0412049	NA	0.0306551	Cytoplasmic	7.8	The protein is possibly multilocated: Cytoplasm_and_Nucleus due to SBLAST search in MultiLocDB
Glyma.07G124500.1.p	Hexokinase	PTHR19443//PTHR19443:SF26 - HEXOKINASE // SUBFAMILY NOT NAMED (1 of 7)	5.701	2.376	1.457	0.00161442	0.0565955	0.387617	Mitochondrial	4	The protein is possibly multilocated: Nucleus_and_Mitochondria due to SBLAST search in MultiLocDB
Glyma.08G157700.1.p	Citrate synthase	PTHR11739:SF8 - CITRATE SYNTHASE, MITOCHONDRIAL (1 of 2)	1.189	0.935	1.743	1	1	0.415219	Mitochondrial	6.8
Glyma.07G246300.1.p	Enoyl-CoA hydratase	1.1.1.35//4.2.1.17//4.2.1.55//5.1.2.3//5.3.3.8 - 3-hydroxyacyl-CoA dehydrogenase / Beta-keto-reductase // Enoyl-CoA hydratase / Unsaturated acyl-CoA hydratase // 3-hydroxybutyryl-CoA dehydratase / Crotonase // Dodecenoyl-CoA isomerase / Dodecenoyl-CoA Delta-isomerase (1 of 3)	1.081	0.614	2.654	1	1	0.623552	Mitochondrial	4.5
Glyma.14G004600.1.p	Acetyl-CoA C-acetyltransferase	2.3.1.9 - Acetyl-CoA C-acetyltransferase / Acetoacetyl-CoA thiolase (1 of 4)	1.7	1.944	0.46	0.750393	0.370289	0.16306	Cytoplasmic	3.4	The protein is possibly multilocated: Mitochondria_and_Endoplasmic_Reticulum due to SBLAST search in MultiLocDB
Figure 6
Glyma.02G309900.1.p	CTP	2.7.7.15 - Choline-phosphate cytidylyltransferase / Phosphorylcholine transferase (1 of 5)	2.257	3.045	0.622	1	0.694706	1	Endoplasmic reticulum	5.6
Glyma.15G051100.1.p	PSD	K01613 - phosphatidylserine decarboxylase (psd, PISD) (1 of 4)	100	100	100				Extracellular (Secreted)	2.8
Glyma.08G138200.2.p	MIPS	5.5.1.4 - Inositol-3-phosphate synthase / Myo-inositol-1-phosphate synthase (1 of 4)	3.102	2.378	4.431	0.0976727	0.33136	0.0270198	Cytoplasmic	8.7	The protein is possibly multilocated: Cytoplasm_and_Nucleus due to SBLAST search in MultiLocDB
Glyma.05G180600.1.p	MIPS	K01858 - myo-inositol-1-phosphate synthase (E5.5.1.4, INO1) (1 of 3)	1.058	0.375	0.351	1	0.842687	0.418196	Cytoplasmic	8.7	The protein is possibly multilocated: Cytoplasm_and_Nucleus due to SBLAST search in MultiLocDB
Glyma.18G018600.1.p	MIPS	K01858 - myo-inositol-1-phosphate synthase (E5.5.1.4, INO1) (1 of 3)	2.366	2.466	3.773	0.509174	0.796616	0.351816	Cytoplasmic	8.7
Glyma.04G009800.1.p	IMP	K18649 - inositol-phosphate phosphatase / L-galactose 1-phosphate phosphatase / histidinol-phosphatase (IMPL2) (1 of 1)	3.266	2.699	3.084	0.0118716	0.0247994	0.00812861
Glyma.01G225200.1.p	PIS	2.7.8.11//6.2.1.3 - CDP-diacylglycerol--inositol 3-phosphatidyltransferase / Phosphatidylinositol synthase // Long-chain-fatty-acid--CoA ligase / Lignoceroyl-CoA synthase (1 of 3)	0.896	0.317	2.302	1	0.00293069	0.00916797	Endoplasmic reticulum with score	8.8
Glyma.08G118400.1.p	Very-long-chain 3-oxoacyl-CoA reductase	PTHR13194:SF19 - NAD(P)-BINDING ROSSMANN-FOLD SUPERFAMILY PROTEIN (1 of 2)	1.336	0.793	0.228	0.931944	0.282597	0.000137613	Extracellular (Secreted)	2.3
Glyma.12G181600.1.p	PI4P5K	PTHR23084//PTHR23084:SF155 - PHOSPHATIDYLINOSITOL-4-PHOSPHATE 5-KINASE RELATED // SUBFAMILY NOT NAMED (1 of 2)	3.727	4.644	4.557	0.293234	0.181027	0.0843683	Extracellular (Secreted)	2.5
Glyma.13G319300.1.p	PI4P5K	PTHR23084//PTHR23084:SF155 - PHOSPHATIDYLINOSITOL-4-PHOSPHATE 5-KINASE RELATED // SUBFAMILY NOT NAMED (1 of 2)	100	100	100	NA	NA	NA	Extracellular (Secreted)	2.4
Glyma.13G062700.1.p	PI4P5K	PTHR23084//PTHR23084:SF155 - PHOSPHATIDYLINOSITOL-4-PHOSPHATE 5-KINASE RELATED // SUBFAMILY NOT NAMED (1 of 2)	12.118	35.816	8.507	0.023065	0.00410763	0.0260512	Membrane bound Chloroplast with score	8.8
Glyma.06G004800.1.p	PI-PLC	4.6.1.13 - Phosphatidylinositol diacylglycerol-lyase / Phosphatidylinositol phospholipase C (1 of 2)	0.901	0.514	0.253	1	0.0111358	0.000359374	Extracellular (Secreted)	2.7	The protein is possibly multilocated: Cytoplasm_and_Mitochondria due to SBLAST search in MultiLocDB
