# Supplementary material for: Galactolipid and Phospholipid Profile and Proteome Alterations in Soybean Leaves at the Onset of Salt Stress
Source: Front Plant Sci. 2021 Mar 17;12:644408. doi: 10.3389/fpls.2021.644408 (PMC8010258; doi:10.3389/fpls.2021.644408)
Supplement: Supplementary file 7 [file Table_9.xlsx]

## Sheet: Proteins
Supplememtary Table S9
Label free quantification proteome raw data of all time points in C08 leaves
Checked	Protein FDR Confidence: Combined	Master	Accession	Description	Exp. q-value: Combined	Sum PEP Score	Coverage [%]	# Peptides	# PSMs	# Protein Unique Peptides	# Unique Peptides	# AAs	MW [kDa]	calc. pI	Score Sequest HT: Sequest HT	# Peptides (by Search Engine): Sequest HT	Abundance Ratio: (0_5h) / (0h)	Abundance Ratio: (1h) / (0h)	Abundance Ratio: (2h) / (0h)	Abundance Ratio Adj. P-Value: (0_5h) / (0h)	Abundance Ratio Adj. P-Value: (1h) / (0h)	Abundance Ratio Adj. P-Value: (2h) / (0h)	Abundances (Grouped): 0_5h	Abundances (Grouped): 0h	Abundances (Grouped): 1h	Abundances (Grouped): 2h	Abundances (Grouped) CV [%]: 0_5h	Abundances (Grouped) CV [%]: 0h	Abundances (Grouped) CV [%]: 1h	Abundances (Grouped) CV [%]: 2h	Abundances (Normalized): F1: Sample, 0_5h	Abundances (Normalized): F2: Sample, 0_5h	Abundances (Normalized): F8: Sample, 0_5h	Abundances (Normalized): F3: Sample, 0h	Abundances (Normalized): F4: Sample, 0h	Abundances (Normalized): F7: Sample, 0h	Abundances (Normalized): F5: Sample, 1h	Abundances (Normalized): F6: Sample, 1h	Abundances (Normalized): F9: Sample, 1h	Abundances (Normalized): F10: Sample, 2h	Abundances (Normalized): F11: Sample, 2h	Abundances (Normalized): F12: Sample, 2h	Found in Sample: [S1] F1: Sample, 0_5h	Found in Sample: [S2] F2: Sample, 0_5h	Found in Sample: [S8] F8: Sample, 0_5h	Found in Sample: [S3] F3: Sample, 0h	Found in Sample: [S4] F4: Sample, 0h	Found in Sample: [S7] F7: Sample, 0h	Found in Sample: [S5] F5: Sample, 1h
FALSE	High	Master Protein	Glyma.16G071500.1.p		0	1762.11	61	199	1085	1	1	4392	486.8	4.31	3359.82	199	100						400				5				5.42897e+06	5.96413e+06	5.54121e+06										Not Found	Not Found	High	Not Found	Not Found	Not Found	Not Found
FALSE	High	Master Protein	Glyma.16G071500.3.p		0	1761.22	61	199	1085	0	1	4382	485.7	4.31	3359.15	199																											Not Found	Not Found	High	Not Found	Not Found	Not Found	Not Found
FALSE	High	Master Protein	Glyma.11G221000.2.p	KOG0651 - 26S proteasome regulatory complex, ATPase RPT4 (1 of 9)	0	958.404	83	47	2576	15	15	443	48.6	6.65	8575.14	47	1.133	1.257	0.525	1	1	1	115.7	102.2	128.4	53.6	13.2	51.35	14	51.2	8.28814e+09	8.99703e+09	1.06847e+10	7.94336e+09	9.03787e+09	2.72554e+09	7.9812e+09	1.04939e+10	9.98317e+09	4.16805e+09	7.87421e+09	2.96098e+09	High	High	High	High	High	High	High
FALSE	High	Master Protein	Glyma.18G036400.2.p	KOG0651 - 26S proteasome regulatory complex, ATPase RPT4 (1 of 9)	0	945.224	83	47	2510	0	13	443	48.6	7.24	8104.11	47	1.107	0.987	0.439	1	1	1	125.3	113.2	111.8	49.7	2.44	61.35	14.41	54.64	7.25623e+09	7.57464e+09	7.56762e+09	6.83741e+09	6.94098e+09	1.48412e+09	5.72255e+09	6.75079e+09	7.65503e+09	3.00226e+09	5.503e+09	1.81955e+09	High	High	High	High	High	High	High
FALSE	High	Master Protein	Glyma.10G142500.1.p	PTHR37729:SF1 - NEUROFILAMENT PROTEIN-RELATED PROTEIN (1 of 2)	0	803.063	80	67	461	0	63	953	104.2	4.3	1774.87	67	2.076	1.713	2.054	0.868417	1	1	121.4	58.5	100.1	120	40.98	44.89	35.17	23.47	1.29355e+09	1.16796e+09	2.36822e+09	6.23042e+08	6.14238e+08	1.26777e+09	1.06709e+09	8.44739e+08	1.65375e+09	8.37553e+08	1.27943e+09	1.3253e+09	High	High	High	High	High	High	High
FALSE	High	Master Protein	Glyma.17G228800.1.p	K00281 - glycine dehydrogenase (GLDC, gcvP) (1 of 4)	0	753.674	43	37	482	0	12	1056	114.5	7.33	1730.3	37	0.741	0.546	0.356	1	0.400548	0.0557292	112.2	151.4	82.6	53.9	14.11	33.79	17.04	15.57	2.11083e+08	1.96618e+08	1.59375e+08	3.29039e+08	2.65362e+08	1.60616e+08	1.19579e+08	1.44757e+08	1.68786e+08	8.65386e+07	1.16328e+08	9.4468e+07	High	High	High	High	High	High	High
FALSE	High	Master Protein	Glyma.02G249600.1.p	PTHR32429:SF12 - RIBULOSE BISPHOSPHATE CARBOXYLASE/OXYGENASE ACTIVASE, CHLOROPLASTIC (1 of 3)	0	727.844	68	34	1659	3	7	478	52.2	6.25	5816.59	34	0.975	1.169	0.447	1	1	1	108.6	111.4	130.2	49.8	14.94	48.74	16.28	48.95	8.04166e+08	6.65503e+08	6.02406e+08	7.03463e+08	6.82588e+08	2.36707e+08	8.87212e+08	7.97676e+08	6.38342e+08	3.04789e+08	5.81192e+08	2.35354e+08	High	High	High	High	High	High	High
FALSE	High	Master Protein	Glyma.09G193300.1.p	K02357 - elongation factor Ts (tsf, TSFM) (1 of 1)	0	683.527	44	58	642	24	25	1135	122.7	4.75	2236.04	58	1.086	1.026	1.625	1	1	0.225697	91.7	84.4	86.6	137.2	31.09	10.58	7.37	6.26	2.96806e+08	2.87136e+08	4.8337e+08	2.73283e+08	2.56068e+08	3.13997e+08	2.80283e+08	3.16604e+08	2.78469e+08	3.98758e+08	4.46486e+08	4.4409e+08	High	High	High	High	High	High	High
FALSE	High	Master Protein	Glyma.14G067000.1.p	PTHR32429:SF12 - RIBULOSE BISPHOSPHATE CARBOXYLASE/OXYGENASE ACTIVASE, CHLOROPLASTIC (1 of 3)	0	683.328	69	35	1781	11	11	478	52.4	5.96	6101.02	35	1.158	1.024	0.485	1	1	0.772727	126.3	109.1	111.7	52.9	15.23	42.66	3.76	29.43	2.41562e+08	2.35832e+08	1.81027e+08	2.16078e+08	2.0365e+08	8.58131e+07	1.95401e+08	2.08509e+08	2.08893e+08	9.87206e+07	1.31891e+08	7.25538e+07	High	High	High	High	High	High	High
FALSE	High	Master Protein	Glyma.06G165200.1.p	K03696 - ATP-dependent Clp protease ATP-binding subunit ClpC (clpC) (1 of 6)	0	677.963	60	53	685	1	1	922	102.4	6.46	2163.68	53	1.495	0.534	0.637	1	1	1	163.1	109.1	58.3	69.5	14.86	62.95	106.12	25.01	9.87602e+06	1.32589e+07	1.12299e+07	1.55919e+07	7.51311e+06	4.40895e+06	458673	4.01445e+06	1.15719e+07	6.84172e+06	4.34938e+06	4.7821e+06	High	High	Not Found	High	High	Peak Found	High
FALSE	High	Master Protein	Glyma.04G200400.2.p	K03696 - ATP-dependent Clp protease ATP-binding subunit ClpC (clpC) (1 of 6)	0	677.182	60	53	685	0	1	922	102.5	6.55	2154.88	53	1.138	0.493	1.161	1	0.435305	1	120.1	105.5	52	122.5	7.96	55.68	17.8	16.73	5.81493e+06	6.43235e+06	5.50715e+06	9.59679e+06	3.13527e+06	5.10834e+06	2.41209e+06	2.51756e+06	3.30633e+06	7.10838e+06	5.93094e+06	5.09511e+06	High	High	Not Found	High	High	Not Found	Not Found
FALSE	High	Master Protein	Glyma.19G130800.1.p	1.4.7.1 - Glutamate synthase (ferredoxin) / Ferredoxin-dependent glutamate synthase (1 of 2)	0	673.778	50	58	445	0	13	1581	172.1	7.11	1398.24	58	0.483	0.279	0.604	0.707932	0.0352288	0.611975	81.7	169.1	47.1	102.1	17.87	21.36	4.63	40.39	7.53248e+07	5.42102e+07	5.83351e+07	1.24563e+08	8.23918e+07	1.20795e+08	3.40409e+07	3.12322e+07	3.36744e+07	1.00873e+08	7.29006e+07	4.26262e+07	High	High	High	High	High	Peak Found	High
FALSE	High	Master Protein	Glyma.03G128300.2.p	1.4.7.1 - Glutamate synthase (ferredoxin) / Ferredoxin-dependent glutamate synthase (1 of 2)	0	665.406	50	59	440	0	14	1621	176.6	6.84	1369.34	59	0.667	0.135	0.279	0.458832	0.00319345	0.0143131	128.2	192.1	26	53.6	24.39	22.07	36.25	8.13	1.04146e+08	6.48201e+07	1.01568e+08	2.12333e+08	1.52167e+08	1.43782e+08	2.94177e+07	2.0615e+07	1.3996e+07	3.81791e+07	4.4895e+07	4.24941e+07	High	High	High	High	High	Peak Found	High
FALSE	High	Master Protein	Glyma.14G094700.1.p	K00281 - glycine dehydrogenase (GLDC, gcvP) (1 of 4)	0	663.11	40	35	451	10	10	1059	114.9	7.5	1583.28	35	0.628	0.43	0.161	0.553741	0.0272743	0.0011686	113.2	180.3	77.5	29	20.07	19.22	18.37	9.88	2.58101e+08	2.22038e+08	1.71331e+08	3.78852e+08	3.53722e+08	2.58503e+08	1.52515e+08	1.52167e+08	1.08519e+08	5.66891e+07	6.71363e+07	5.69698e+07	High	High	High	High	High	Peak Found	High
FALSE	High	Master Protein	Glyma.16G002500.1.p	PTHR19375//PTHR19375:SF147 - HEAT SHOCK PROTEIN 70KDA // SUBFAMILY NOT NAMED (1 of 3)	0	640.073	62	46	997	18	19	689	73.7	5.34	3474.59	46	1.347	1.174	2.549	1	1	0.307322	88.8	65.9	77.4	167.9	20.91	31.75	53.49	15.67	1.08238e+09	1.37184e+09	1.65517e+09	1.01833e+09	1.00023e+09	1.68871e+09	1.12621e+09	1.19568e+09	2.71554e+09	2.59523e+09	2.15218e+09	2.95531e+09	High	High	High	High	High	High	High
FALSE	High	Master Protein	Glyma.15G026500.1.p	K15718 - linoleate 9S-lipoxygenase (LOX1_5) (1 of 21)	0	624.06	57	54	627	3	6	853	96.6	6.07	1953.13	54	0.946	0.623	0.193	1	1	1	136.9	144.8	90.3	28	27.86	76.77	12.8	117.31	2.11736e+08	1.19387e+08	1.6618e+08	2.03491e+08	1.75716e+08	1.606e+07	9.94363e+07	1.09524e+08	1.27772e+08	3.39708e+07	2.26607e+08	2.82039e+07	High	High	High	High	High	High	High
FALSE	High	Master Protein	Glyma.13G347700.1.p	K15718 - linoleate 9S-lipoxygenase (LOX1_5) (1 of 21)	0	614.858	58	53	613	7	9	853	96.4	6.1	1897.72	53	1.249	0.452	0.591	1	0.0618669	0.354239	151.8	121.5	54.9	71.8	29.87	16.75	4.93	13.44	2.30894e+08	1.76584e+08	1.24897e+08	1.41395e+08	1.13489e+08	1.5938e+08	6.25519e+07	6.86413e+07	6.38605e+07	8.17215e+07	8.35227e+07	1.03405e+08	High	High	High	High	High	Not Found	High
FALSE	High	Master Protein	Glyma.11G096400.1.p	KOG0933//KOG4643 - Structural maintenance of chromosome protein 2 (chromosome condensation complex Condensin, subunit E) // Uncharacterized coiled-coil protein (1 of 1)	0	612.657	65	85	545	41	41	1357	153.2	4.7	1509.37	85	1.457	1.424	2.552	1	1	0.625957	90.6	62.2	88.5	158.7	46.79	41.81	50.47	18.61	6.81128e+08	5.85042e+08	1.32918e+09	4.67428e+08	4.31382e+08	8.76975e+08	6.6562e+08	5.45272e+08	1.34202e+09	8.75129e+08	1.19278e+09	1.26268e+09	High	High	High	High	High	High	High
FALSE	High	Master Protein	Glyma.20G091100.1.p	PTHR37729:SF1 - NEUROFILAMENT PROTEIN-RELATED PROTEIN (1 of 2)	0	597.226	72	52	327	0	48	787	85.8	4.37	1222.74	52	1.477	1.104	1.51	1	1	0.769415	116	78.6	86.7	118.7	26.43	26.65	28.35	21.63	9.42806e+08	8.69077e+08	1.39043e+09	6.38441e+08	6.04555e+08	9.5906e+08	7.04888e+08	5.78513e+08	9.98941e+08	8.87802e+08	9.64232e+08	1.31605e+09	High	High	High	High	High	High	High
FALSE	High	Master Protein	Glyma.15G261900.1.p	PTHR11406:SF8 - PHOSPHOGLYCERATE KINASE 1, CHLOROPLASTIC-RELATED (1 of 2)	0	596.409	76	35	1357	1	6	483	50	8.15	4642.12	35	1.043	3.148	0.578	1	0.871971	1	72.3	69.3	218.3	40.1	11.97	111.72	21.42	70.4	1.6362e+09	2.08227e+09	1.8928e+09	7.04584e+09	1.81462e+09	4.69104e+08	5.71206e+09	4.95889e+09	7.48323e+09	1.04881e+09	2.17734e+09	4.7133e+08	High	High	High	High	High	High	High
FALSE	High	Master Protein	Glyma.05G201100.1.p	K03696 - ATP-dependent Clp protease ATP-binding subunit ClpC (clpC) (1 of 6)	0	588.508	55	49	553	2	2	919	102.3	6.77	1727.37	49	0.804	1.092	0.845	1	1	1	85.9	106.9	116.8	90.3	16.54	7.18	73.82	28.02	5.19171e+06	7.00112e+06	5.47204e+06	6.80961e+06	6.43175e+06	7.41189e+06	4.60893e+06	7439377	1.90488e+07	5.70264e+06	9.04462e+06	5.7532e+06	High	Not Found	High	High	High	Not Found	High
FALSE	High	Master Protein	Glyma.08G165500.1.p	PTHR11406:SF8 - PHOSPHOGLYCERATE KINASE 1, CHLOROPLASTIC-RELATED (1 of 2)	0	584.742	78	36	1259	4	4	485	50.2	8.13	4361.74	36	0.958	1.127	0.421	1	1	1	109.3	114.1	128.6	48	9.5	58.9	7.57	89.89	1.09146e+09	1.07379e+09	9.14468e+08	1.12092e+09	1.27578e+09	2.93404e+08	1.10913e+09	1.2631e+09	1.27348e+09	4.71359e+08	1.45632e+09	2.34655e+08	High	High	High	High	High	High	High
FALSE	High	Master Protein	Glyma.08G274400.1.p	PTHR11680:SF10 - SERINE HYDROXYMETHYLTRANSFERASE 1, MITOCHONDRIAL (1 of 2)	0	575.909	75	33	586	0	8	518	57.3	8.56	1970.77	33	0.833	0.537	0.448	1	0.792228	0.767546	118.3	141.9	76.2	63.6	10.27	21.03	51.55	42.04	4.57623e+08	5.30978e+08	4.38368e+08	6.24005e+08	5.49078e+08	4.06126e+08	1.71059e+08	2.94966e+08	4.99613e+08	2.46255e+08	4.78026e+08	2.41184e+08	High	High	High	High	High	High	High
FALSE	High	Master Protein	Glyma.18G150000.1.p	PTHR11680:SF10 - SERINE HYDROXYMETHYLTRANSFERASE 1, MITOCHONDRIAL (1 of 2)	0	563.229	75	32	505	8	8	518	57.3	8.79	1727.88	32	0.907	0.786	0.229	1	1	1	124.2	136.9	107.6	31.3	19.12	76.12	5.54	75.92	2.20206e+08	2.45989e+08	1.66888e+08	2.90704e+08	2.42772e+08	2.48811e+07	1.92618e+08	1.73966e+08	1.90811e+08	5.55497e+07	1.77257e+08	5.06341e+07	High	High	High	High	High	High	High
FALSE	High	Master Protein	Glyma.01G145400.1.p	PTHR11741:SF3 - ELONGATION FACTOR TS (1 of 3)	0	550.927	39	48	530	0	15	1133	122.5	4.73	1774.76	48	1.185	1.045	1.271	1	1	0.630602	105.3	88.8	92.9	113	20.38	14.47	21.69	11.84	1.94148e+08	2.16807e+08	2.84988e+08	1.53792e+08	1.82894e+08	2.06034e+08	1.91182e+08	1.75929e+08	2.61088e+08	2.32545e+08	2.7419e+08	2.19264e+08	High	High	High	High	High	High	High
FALSE	High	Master Protein	Glyma.12G232000.1.p	K02111 - F-type H+-transporting ATPase subunit alpha (ATPF1A, atpA) (1 of 2)	0	547.261	68	31	989	23	31	510	55.7	5.21	2926.48	31	1.014	0.637	0.157	1	1	1	144.5	142.5	90.7	22.4	15	69.93	11.24	132.81	1.26618e+10	1.13149e+10	9.3484e+09	1.28199e+10	1.11598e+10	1.71539e+09	8.28479e+09	6.69127e+09	7.10346e+09	1.7534e+09	1.60108e+10	1.20013e+09	High	High	High	High	High	High	High
FALSE	High	Master Protein	Glyma.08G175900.1.p	PTHR11353:SF8 - CHAPERONIN 60 SUBUNIT BETA 1, CHLOROPLASTIC-RELATED (1 of 3)	0	546.542	66	39	726	1	4	592	62.8	6.04	2564.93	39	1.307	0.462	0.786	1	0.865093	1	147	112.5	52	88.5	17.52	19.21	71.79	4.7	6.78219e+07	9.05922e+07	9.56938e+07	6.9339e+07	9.22277e+07	6.5288e+07	3.20576e+07	92984016	2.76088e+07	5.45105e+07	5.51914e+07	5.05455e+07	High	High	High	High	High	Peak Found	High
FALSE	High	Master Protein	Glyma.04G188700.1.p	K02358 - elongation factor Tu (tuf, TUFM) (1 of 8)	0	544.985	66	26	591	5	6	480	52.2	6.68	2167.39	26	1.008	0.798	0.752	1	1	1	113.4	112.4	89.7	84.5	21.24	51.75	36.76	33.6	4.80652e+08	4.96005e+08	6.92547e+08	4.91935e+08	5.16018e+08	1.56636e+08	3.92628e+08	3.76047e+08	6.94575e+08	2.7311e+08	5.3378e+08	3.69769e+08	High	High	High	High	High	High	High
FALSE	High	Master Protein	Glyma.15G026400.1.p	K15718 - linoleate 9S-lipoxygenase (LOX1_5) (1 of 21)	0	536.316	54	46	491	0	6	856	96.3	6.81	1627.19	46	1.063	0.68	0.537	1	0.272464	0.0338679	129.7	122	82.9	65.5	22.64	12.89	6.23	15.21	5.28946e+07	3.36863e+07	4.14669e+07	3.89985e+07	3.36958e+07	4.36868e+07	2.65117e+07	2.66558e+07	2.38157e+07	2.09358e+07	2.1241e+07	1.59864e+07	High	High	High	High	High	Peak Found	High
FALSE	High	Master Protein	Glyma.06G176900.1.p	K02358 - elongation factor Tu (tuf, TUFM) (1 of 8)	0	531.1	67	23	531	3	3	479	52.1	6.68	2046.61	23	0.904	0.73	0.287	1	0.640172	0.00303361	123.8	136.9	100	39.3	13.68	3.19	15.97	24.82	2.59315e+08	2.24414e+08	2.95448e+08	2.88404e+08	2.72044e+08	2.86728e+08	2.09334e+08	1.76451e+08	2.4345e+08	6.09996e+07	1.0147e+08	8.22684e+07	High	High	High	High	High	High	High
FALSE	High	Master Protein	Glyma.20G123600.1.p	K02133 - F-type H+-transporting ATPase subunit beta (ATPeF1B, ATP5B, ATP2) (1 of 3)	0	529.115	65	26	421	4	4	559	59.8	6.15	1474.92	26	2.752	2.687	0.696	0.214598	0.138264	1	154.3	56.1	150.7	39	12.42	9.51	6.02	64.64	1.10715e+08	8.67299e+07	1.04929e+08	3.8135e+07	3.41671e+07	4.13573e+07	9.48695e+07	1.06938e+08	1.02474e+08	2.46493e+07	7.12601e+07	2.6537e+07	High	High	High	High	High	High	Peak Found
FALSE	High	Master Protein	Glyma.06G019400.1.p	PTHR23076:SF33 - ATP-DEPENDENT ZINC METALLOPROTEASE FTSH 1, CHLOROPLASTIC-RELATED (1 of 2)	0	521.655	44	29	362	5	5	696	74.3	6.24	1424.92	29	0.847	0.836	0.361	1	1	0.593571	111.3	131.4	109.9	47.5	13.61	41.52	6.54	35.97	1.29815e+08	1.04744e+08	1.02168e+08	1.24146e+08	1.23633e+08	5.20214e+07	1.03417e+08	1.04135e+08	9.24719e+07	4.46601e+07	7.84509e+07	4.32086e+07	High	High	High	High	High	High	High
FALSE	High	Master Protein	Glyma.15G250500.1.p	PTHR11353:SF8 - CHAPERONIN 60 SUBUNIT BETA 1, CHLOROPLASTIC-RELATED (1 of 3)	0	519.516	64	39	717	4	4	591	62.8	5.87	2464.79	39	1.02	0.482	0.556	1	0.610921	0.463875	133.4	130.8	63	72.8	7.16	8.83	55.38	17.26	6.971e+07	7.47152e+07	8.04425e+07	6.6271e+07	7.91231e+07	7.32832e+07	2.94151e+07	7.75685e+07	3.53073e+07	4.07558e+07	4.96703e+07	3.53427e+07	High	High	High	High	High	High	High
FALSE	High	Master Protein	Glyma.11G195900.3.p	PTHR11353:SF11 - CHAPERONIN 60 SUBUNIT ALPHA 1, CHLOROPLASTIC (1 of 2)	0	518.229	70	38	857	0	6	584	61.7	5.34	2757.12	38	1.26	1.296	1.098	1	0.889328	1	108.3	86	111.4	94.4	20.02	37.34	38.19	60.39	1.63264e+08	1.76831e+08	2.35545e+08	1.40372e+08	1.45586e+08	6.7025e+07	1.58848e+08	1.81895e+08	3.13155e+08	1.54128e+08	3.173e+08	9.68214e+07	High	High	High	High	High	High	High
FALSE	High	Master Protein	Glyma.04G019100.1.p	PTHR23076:SF33 - ATP-DEPENDENT ZINC METALLOPROTEASE FTSH 1, CHLOROPLASTIC-RELATED (1 of 2)	0	512.85	44	29	352	1	5	694	74.1	6.19	1397.49	29	0.994	0.832	0.503	1	1	0.564964	119.5	120.2	100	60.4	7.88	35.32	27.8	21.66	1.23904e+08	1.1008e+08	1.28315e+08	1.24616e+08	1.41502e+08	6.67755e+07	1.03682e+08	1.0292e+08	1.62555e+08	5.36468e+07	8.1633e+07	6.26442e+07	High	High	High	High	High	High	High
FALSE	High	Master Protein	Glyma.12G078100.1.p	PTHR11353:SF11 - CHAPERONIN 60 SUBUNIT ALPHA 1, CHLOROPLASTIC (1 of 2)	0	510.907	70	37	863	5	5	584	61.7	5.4	2805.89	37	2.488	2.279	1.323	0.184935	0.270621	0.539754	140.4	56.4	128.6	74.6	22.73	48.44	34.3	33.4	2.79468e+08	2.82589e+08	4.08337e+08	1.13564e+08	1.2646e+08	4.19437e+07	1.64058e+08	2.58791e+08	3.37708e+08	1.50237e+08	2.57204e+08	1.4943e+08	High	High	High	High	High	High	High
FALSE	High	Master Protein	Glyma.08G008400.1.p	K03696 - ATP-dependent Clp protease ATP-binding subunit ClpC (clpC) (1 of 6)	0	492.666	48	43	483	1	1	919	102.1	6.8	1495.01	43	2.669	0.397	0.3	1	1	0.884349	244.5	91.6	36.4	27.5	62.39	54.36	47.13	11.76	1.14024e+07	2.28184e+06	1.061e+07	3.97568e+06	4.51005e+06	1.22933e+06	993096	1.5793e+06	2.59834e+06	1.1937e+06	1.4024e+06	1.12195e+06	Peak Found	Peak Found	Not Found	Peak Found	Peak Found	Peak Found	Peak Found
FALSE	High	Master Protein	Glyma.11G140500.1.p	PTHR19375:SF232 - MEDIATOR OF RNA POLYMERASE II TRANSCRIPTION SUBUNIT 37E-RELATED (1 of 8)	0	489.538	55	30	480	4	4	649	71	5.21	1624.08	30	1.378	1.223	0.965	1	1	1	120.8	87.6	107.1	84.5	24.53	18.54	46.3	45.59	1.13142e+08	7.42505e+07	1.21639e+08	8.20865e+07	1.00207e+08	6.92624e+07	9.20983e+07	100365987	2.01225e+08	5.97498e+07	1.41281e+08	7.91923e+07	High	High	High	High	High	Peak Found	High
FALSE	High	Master Protein	Glyma.10G267200.1.p	K02133 - F-type H+-transporting ATPase subunit beta (ATPeF1B, ATP5B, ATP2) (1 of 3)	0	483.193	65	25	413	3	3	559	59.8	6.15	1428.19	25	0.811	1.036	0.677	1	1	1	92	113.5	117.6	76.9	38.57	67	30.17	60.82	9.19445e+07	8.61359e+07	1.65361e+08	1.13434e+08	1.24086e+08	1.96893e+07	1.17467e+08	89393740	1.63124e+08	2.76918e+07	1.17623e+08	7.67969e+07	High	High	High	High	High	Peak Found	High
FALSE	High	Master Protein	Glyma.16G038300.1.p	K00549 - 5-methyltetrahydropteroyltriglutamate--homocysteine methyltransferase (metE) (1 of 6)	0	479.237	54	31	321	0	6	763	84.2	6.33	1095.78	31	1.2	0.595	0.288	1	0.731821	0.071109	155.7	129.8	77.2	37.4	41.01	24.69	27.08	45.51	2.09204e+08	1.68499e+08	8.50975e+07	1.87563e+08	1.40462e+08	1.15673e+08	5.15362e+07	8.89726e+07	8.35215e+07	4.04323e+07	4.93332e+07	1.7717e+07	High	High	Peak Found	High	High	Peak Found	High
FALSE	High	Master Protein	Glyma.03G171100.1.p	PTHR19375//PTHR19375:SF200 - HEAT SHOCK PROTEIN 70KDA // SUBFAMILY NOT NAMED (1 of 1)	0	477.635	60	33	472	0	3	653	71.4	5.16	1558.93	33	1.572	1.06	1.522	1	1	1	122	77.6	82.3	118.1	22.04	20.36	48.29	51.8	4.3486e+07	3.64613e+07	5.61983e+07	2.76585e+07	3.17495e+07	2.09475e+07	2.93206e+07	1.9114e+07	5.02809e+07	2.20752e+07	6.74128e+07	4.21009e+07	High	High	High	High	High	High	High
FALSE	High	Master Protein	Glyma.02G038100.2.p	2.6.1.4 - Glycine transaminase / Glycine aminotransferase (1 of 2)	0	474.116	51	26	406	11	11	481	53.5	5.48	1346.34	26	0.947	0.509	0.378	1	1	0.31648	133.7	141.1	71.8	53.3	4.52	39.8	23.95	36.44	4.0619e+08	3.71113e+08	3.87219e+08	4.08839e+08	4.08831e+08	1.79666e+08	2.08038e+08	2.93365e+08	1.90013e+08	1.54524e+08	2.02976e+08	9.36277e+07	High	High	High	High	High	High	High
FALSE	High	Master Protein	Glyma.17G037900.1.p	1.6.2.6//1.8.1.4 - Dihydrolipoyl dehydrogenase / Lipoyl dehydrogenase (1 of 2)	0	470.611	60	27	389	6	6	500	52.9	7.34	1325.91	27	0.961	0.828	0.605	1	1	1	113.3	117.9	97.5	71.3	27.75	52.62	17.16	41.01	3.60166e+08	3.66317e+08	2.12846e+08	3.82392e+08	3.74669e+08	1.13974e+08	3.10059e+08	3.02459e+08	4.07072e+08	2.26508e+08	3.14588e+08	1.30905e+08	High	High	High	High	High	High	High
FALSE	High	Master Protein	Glyma.13G347800.1.p	K15718 - linoleate 9S-lipoxygenase (LOX1_5) (1 of 21)	0	468.516	51	43	408	4	4	822	92.7	7.01	1240.25	43	1.142	0.153	0.222	1	0.0197412	0.0219499	181.5	158.9	24.3	35.3	22.71	32.28	39.58	33	9.82644e+06	6.25903e+06	9.27006e+06	1.10645e+07	5.7166e+06	8.11636e+06	1.01813e+06	2.10887e+06	1.24081e+06	1.80413e+06	1.99251e+06	999260	High	High	Not Found	High	High	Not Found	High
FALSE	High	Master Protein	Glyma.12G064000.1.p	PTHR19375:SF232 - MEDIATOR OF RNA POLYMERASE II TRANSCRIPTION SUBUNIT 37E-RELATED (1 of 8)	0	468.452	55	30	461	3	3	649	71	5.21	1552.71	30	2.478	2.213	2.251	0.308089	0.20464	0.183537	124.8	50.4	111.5	113.4	33.42	45.86	32.89	19.25	8.38814e+07	4.14642e+07	6.56917e+07	2.65101e+07	2.96872e+07	1.06208e+07	4.49071e+07	5.86724e+07	8.56996e+07	5.96826e+07	4.91408e+07	7.23603e+07	High	High	High	High	High	High	High
FALSE	High	Master Protein	Glyma.12G022500.1.p	KOG0018//KOG0933//KOG0964//KOG4643 - Structural maintenance of chromosome protein 1 (sister chromatid cohesion complex Cohesin, subunit SMC1) // Structural maintenance of chromosome protein 2 (chromosome condensation complex Condensin, subunit E) // Structural maintenance of chromosome protein 3 (sister chromatid cohesion complex Cohesin, subunit SMC3) // Uncharacterized coiled-coil protein (1 of…	0	467.936	54	67	363	0	23	1357	153.5	4.72	1000.43	67	1.183	1.227	1.86	1	1	0.63578	89.8	75.9	93.1	141.2	28.66	33.33	45.81	8.31	1.13117e+08	1.1248e+08	1.79889e+08	9.56075e+07	8.71087e+07	1.56153e+08	1.17329e+08	9.33435e+07	2.16334e+08	1.71236e+08	2.00274e+08	1.77859e+08	High	High	High	High	High	High	Peak Found
FALSE	High	Master Protein	Glyma.08G086600.1.p	PTHR23076//PTHR23076:SF60 - METALLOPROTEASE M41 FTSH // SUBFAMILY NOT NAMED (1 of 4)	0	467.77	54	33	438	5	5	696	74.9	5.96	1406.69	33	1.1	1.24	0.454	1	1	1	116	105.4	130.7	47.8	43.85	23.88	37.48	65.01	1.46321e+08	1.67574e+08	3.15141e+08	1.52294e+08	1.69975e+08	1.04344e+08	1.2447e+08	1.88827e+08	2.69851e+08	6.82167e+07	1.92408e+08	6.90884e+07	High	High	High	High	High	High	High
FALSE	High	Master Protein	Glyma.10G293500.1.p	2.2.1.1//2.2.1.2 - Transketolase / Glycoaldehyde transferase // Transaldolase / Glycerone transferase (1 of 2)	0	467.02	55	34	575	7	8	742	80.2	6.57	1843.98	34	0.642	0.657	0.315	1	1	0.76831	98.2	153	100.6	48.2	53.76	45.7	65.66	13.71	8.55517e+08	5.68293e+08	2.5426e+08	8.85547e+08	9.36983e+08	3.41928e+08	9.31037e+08	5.82128e+08	1.87196e+08	2.78951e+08	3.06078e+08	2.32233e+08	High	High	High	High	High	High	High
FALSE	High	Master Protein	Glyma.01G010200.1.p	2.7.1.19 - Phosphoribulokinase / Phosphopentokinase (1 of 2)	0	466.804	60	25	570	4	4	407	45.2	6.28	1954.81	25	0.931	0.59	0.154	1	1	1	139.2	149.5	88.2	23.1	25.57	79.79	47.75	71.7	6.45345e+08	9.00572e+08	5.5535e+08	7.14148e+08	6.92902e+08	3.807e+07	2.8983e+08	7.29458e+08	4.09101e+08	1.07035e+08	2.66553e+08	6.74291e+07	High	High	High	High	High	High	High
FALSE	High	Master Protein	Glyma.09G210900.1.p	2.7.1.19 - Phosphoribulokinase / Phosphopentokinase (1 of 2)	0	464.828	60	25	567	4	4	407	45.3	6.09	1939.01	25	0.918	0.487	0.218	1	1	1	140	152.5	74.2	33.3	29.55	79.75	46.05	35.81	6.18586e+08	8.64599e+08	4.82618e+08	6.7358e+08	7.59571e+08	4.16352e+07	3.27862e+08	6.63184e+08	3.08393e+08	1.83396e+08	1.47153e+08	8.52419e+07	High	High	High	High	High	High	High
FALSE	High	Master Protein	Glyma.19G172200.1.p	PTHR19375:SF232 - MEDIATOR OF RNA POLYMERASE II TRANSCRIPTION SUBUNIT 37E-RELATED (1 of 8)	0	462.181	60	33	453	2	3	654	71.5	5.16	1478.95	33	2.449	2.17	1.682	1	1	0.540089	134.2	54.8	118.9	92.2	12.35	5.33	38.44	118.2	3.62305e+07	3.27848e+07	2.82459e+07	1.33873e+07	1.22583e+07	1.35283e+07	2.90455e+07	1.39455e+07	3.16728e+07	2.25154e+07	2.06578e+07	1.60717e+08	High	High	High	High	High	Not Found	High
FALSE	High	Master Protein	Glyma.12G166200.1.p	PTHR19375//PTHR19375:SF147 - HEAT SHOCK PROTEIN 70KDA // SUBFAMILY NOT NAMED (1 of 3)	0	460.079	61	30	693	3	3	543	57.7	5.33	2500.45	30	0.487	0.223	1.677	1	0.440367	1	57.5	118.1	26.4	198	39.05	64.04	109.73	27.88	1.64643e+07	2.39892e+07	3.62441e+07	4.92585e+07	3.58646e+07	1.16018e+08	1.52206e+06	10991085	3.5642e+07	1.19119e+08	8.25978e+07	7.05259e+07	High	High	High	High	Peak Found	High	High
FALSE	High	Master Protein	Glyma.20G243500.1.p	2.2.1.1//2.2.1.2 - Transketolase / Glycoaldehyde transferase // Transaldolase / Glycerone transferase (1 of 2)	0	457.578	55	35	561	9	9	740	80	6.47	1792.24	35	0.802	1.242	0.391	1	1	1	93.3	116.4	144.7	45.5	57.26	34.2	22.52	53.09	4.83858e+08	2.50572e+08	1.54012e+08	3.28695e+08	3.12571e+08	1.62537e+08	5.27102e+08	3.88361e+08	3.46073e+08	1.22274e+08	2.83931e+08	1.21884e+08	High	High	High	High	High	Peak Found	High
FALSE	High	Master Protein	Glyma.07G006900.1.p	K15718 - linoleate 9S-lipoxygenase (LOX1_5) (1 of 21)	0	449.957	66	47	381	35	37	859	96.3	6.7	1096.64	47	0.868	0.543	0.717	1	0.392705	0.441567	110.9	127.9	69.5	91.7	30.75	16.87	8.53	39.31	1.22494e+09	6.9319e+08	8.09366e+08	1.21723e+09	9.32924e+08	9.07428e+08	4.92792e+08	5.76539e+08	5.06907e+08	3.34199e+08	6.6911e+08	7.85914e+08	High	High	High	High	High	Peak Found	High
FALSE	High	Master Protein	Glyma.05G132000.1.p	PTHR23076//PTHR23076:SF60 - METALLOPROTEASE M41 FTSH // SUBFAMILY NOT NAMED (1 of 4)	0	447.951	54	32	422	5	5	695	74.8	5.73	1367.16	32	2.57	0.911	0.875	0.399391	1	1	191.9	74.7	68.1	65.3	33.89	32.53	74.09	15.63	2.98555e+08	3.86711e+08	5.77694e+08	1.679e+08	1.50497e+08	8.4948e+07	1.06204e+08	1.37122e+08	3.92213e+08	1.14414e+08	1.56102e+08	1.31637e+08	High	High	High	High	High	Peak Found	High
FALSE	High	Master Protein	Glyma.19G114500.2.p	K00549 - 5-methyltetrahydropteroyltriglutamate--homocysteine methyltransferase (metE) (1 of 6)	0	437.117	54	31	300	5	6	763	84.2	6.37	971.07	31	1.086	0.529	0.659	1	0.817246	0.873811	132.7	122.2	64.6	80.5	12.31	25.16	51.01	16.27	2.44912e+07	1.92814e+07	2.34551e+07	2.7106e+07	2.15988e+07	1.62165e+07	9.07065e+06	1.14293e+07	2.28517e+07	1.42357e+07	1.22826e+07	1.69797e+07	High	High	High	High	High	Peak Found	High
FALSE	High	Master Protein	Glyma.16G143600.1.p	K02716 - photosystem II oxygen-evolving enhancer protein 1 (psbO) (1 of 4)	0	433.374	68	29	2439	2	2	331	35	7.06	7427.62	29	0.094	0.094	1.341	0.311722	0.163079	1	14.9	158.2	14.9	212	79.78	57.39	81.04	40.32	3.70429e+06	3.24112e+06	1.23529e+07	3.94434e+07	1.81745e+07	6.50355e+07	2.46758e+06	3.72341e+06	1.11239e+07	5.28742e+07	2.43832e+07	5.82967e+07	Peak Found	Peak Found	High	Not Found	Peak Found	High	Peak Found
FALSE	High	Master Protein	Glyma.01G026700.1.p	2.6.1.4 - Glycine transaminase / Glycine aminotransferase (1 of 2)	0	431.742	51	24	364	9	9	481	53.5	5.69	1197.43	24	1.215	0.667	0.582	1	1	1	140.3	115.5	77	67.2	7.73	39.17	37.89	52.98	3.2369e+08	3.7125e+08	3.71284e+08	3.60093e+08	3.05642e+08	1.53667e+08	2.0391e+08	1.98438e+08	3.70107e+08	1.77971e+08	3.23832e+08	1.11999e+08	High	High	High	High	High	High	High
FALSE	High	Master Protein	Glyma.08G170000.1.p	K03234 - elongation factor 2 (EEF2) (1 of 3)	0	417.386	47	35	302	0	35	843	94	6.11	873.41	35	1.157	0.762	1.109	1	1	0.996615	114.9	99.3	75.6	110.2	18.64	23.9	14.8	27.84	7.0069e+08	5.14271e+08	7.42968e+08	6.48796e+08	6.05833e+08	4.01839e+08	4.45155e+08	4.61386e+08	5.79424e+08	5.39386e+08	9.30267e+08	6.7215e+08	High	High	High	High	High	High	High
FALSE	High	Master Protein	Glyma.03G068100.1.p	PTHR32429:SF12 - RIBULOSE BISPHOSPHATE CARBOXYLASE/OXYGENASE ACTIVASE, CHLOROPLASTIC (1 of 3)	0	411.085	49	23	834	0	6	474	52.2	5.74	2629.75	23	0.938	0.798	0.236	1	1	0.927215	126.2	134.6	107.4	31.8	56.99	68.98	56.21	31.65	2.0361e+08	1.75146e+08	5.03569e+07	1.86814e+08	2.15224e+08	3.05128e+07	1.49131e+08	1.8998e+08	4.87558e+07	4.41521e+07	5.49348e+07	2.82343e+07	High	High	High	High	High	High	Peak Found
FALSE	High	Master Protein	Glyma.01G180800.1.p	K02716 - photosystem II oxygen-evolving enhancer protein 1 (psbO) (1 of 4)	0	410.636	66	27	2322	2	2	329	34.8	6.77	6958.34	27	0.838	0.614	4.237	1	0.725635	1	50.1	59.8	36.7	253.4	16.52	116.42	42.16	66.12	4.44902e+08	6.20899e+08	5.63087e+08	6.71552e+08	6.49468e+08	4.72319e+09	1.99571e+08	4.12283e+08	5.06284e+08	2.84528e+09	7.90509e+08	4.24198e+09	High	High	High	High	High	High	High
FALSE	High	Master Protein	Glyma.16G089000.1.p	K00099 - 1-deoxy-D-xylulose-5-phosphate reductoisomerase (dxr) (1 of 3)	0	410.046	62	25	439	0	23	465	50.5	6.21	1483.25	25	1.187	1.266	0.339	1	1	1	125.2	105.5	133.6	35.8	15.9	55.62	45.1	87.66	2.7507e+09	2.78215e+09	2.06915e+09	2.42548e+09	2.31778e+09	6.44094e+08	1.42577e+09	2.93451e+09	3.88292e+09	7.85891e+08	2.72641e+09	5.61585e+08	High	High	High	High	High	High	High
FALSE	High	Master Protein	Glyma.17G137600.1.p	K02355 - elongation factor G (fusA, GFM, EFG) (1 of 3)	0	407.542	51	29	307	6	6	787	86.8	5.77	1010.26	29	1.034	0.868	0.289	1	1	0.119811	129.6	125.3	108.8	36.2	26.06	14.48	38.31	39.24	1.91864e+08	1.52198e+08	1.12526e+08	1.47661e+08	1.4717e+08	1.13289e+08	1.27811e+08	1.60262e+08	6.99862e+07	4.25024e+07	7.36211e+07	3.6421e+07	High	High	High	High	High	Peak Found	High
FALSE	High	Master Protein	Glyma.09G072100.1.p	PTHR10772:SF0 - 20 KDA CHAPERONIN, CHLOROPLASTIC (1 of 4)	0	404.844	68	20	650	0	2	253	26.6	7.39	2614.72	20	1.462	1.562	4.137	1	1	0.935264	71.7	49	76.5	202.8	37.1	108.14	14.77	41.94	2.62471e+08	3.09196e+08	5.15101e+08	1.75907e+08	2.11473e+08	1.15803e+09	3.3028e+08	406225449	3.08146e+08	8.74961e+08	4.2314e+08	1.06739e+09	High	High	High	High	High	High	High
FALSE	High	Master Protein	Glyma.15G180900.1.p	PTHR10772:SF0 - 20 KDA CHAPERONIN, CHLOROPLASTIC (1 of 4)	0	402.63	66	19	611	1	1	253	26.7	8.19	2512.67	19	0.969	1.805	1.61	1	1	1	72	74.3	134.1	119.6	35.12	92.14	59.07	51.3	8.95833e+07	1.12417e+08	5.3179e+07	7.23388e+07	9.24883e+07	3.62255e+08	1.66986e+08	173730458	4.04867e+07	1.48863e+08	5.01007e+07	1.65182e+08	High	High	High	High	High	High	High
FALSE	High	Master Protein	Glyma.11G061300.1.p	K02716 - photosystem II oxygen-evolving enhancer protein 1 (psbO) (1 of 4)	0	401.932	67	27	2301	4	4	329	34.8	5.67	7011.28	27	0.673	0.397	8.039	1	1	1	26.6	39.6	15.7	318.1	101.88	148.07	131.05	42.83	5.60364e+07	8.89793e+07	3.80017e+08	5.39493e+07	1.32203e+08	1.72823e+09	9.88449e+06	5.24557e+07	3.11954e+08	1.56259e+09	6.33123e+08	1.06275e+09	High	High	High	High	High	High	High
FALSE	High	Master Protein	Glyma.11G135900.1.p	PTHR14194:SF38 - PROTEIN PLASTID TRANSCRIPTIONALLY ACTIVE 16 (1 of 2)	0	401.259	58	33	455	11	11	516	55.5	8.65	1569.17	33	1.092	1.036	0.863	1	1	1	109.4	100.2	103.8	86.5	13.03	15.57	8.43	16.77	3.17901e+08	3.34036e+08	4.04159e+08	3.05975e+08	3.44523e+08	2.51366e+08	3.44873e+08	2.91357e+08	3.16859e+08	3.40742e+08	2.6414e+08	2.52501e+08	High	High	High	High	High	High	High
FALSE	High	Master Protein	Glyma.07G232900.1.p	1.6.2.6//1.8.1.4 - Dihydrolipoyl dehydrogenase / Lipoyl dehydrogenase (1 of 2)	0	401.225	57	25	318	4	4	500	53	7.34	1103.05	25	0.803	0.718	0.597	1	1	0.183129	103	128.3	92.1	76.6	30.84	11.12	3.47	28.24	1.97003e+07	2.96359e+07	1.66625e+07	2.53123e+07	2.45274e+07	2.04562e+07	1.74438e+07	1.85924e+07	1.76143e+07	1.464e+07	1.51353e+07	8.63941e+06	High	High	Peak Found	High	High	Peak Found	High
FALSE	High	Master Protein	Glyma.02G124500.1.p	K09487 - heat shock protein 90kDa beta (HSP90B, TRA1) (1 of 6)	0	396.823	55	33	276	3	3	794	90	4.98	849.09	33	0.922	0.362	0.203	1	0.613665	0.221356	148.3	160.9	58.2	32.6	58.01	10.96	71.84	11.67	2.69406e+07	2.9988e+07	7.16115e+06	3.14533e+07	2.52553e+07	2.92242e+07	4.02727e+06	2.08869e+07	1.05791e+07	5.5801e+06	6.95784e+06	5.91879e+06	High	High	High	High	High	Not Found	Peak Found
FALSE	High	Master Protein	Glyma.02G061100.1.p	K02716 - photosystem II oxygen-evolving enhancer protein 1 (psbO) (1 of 4)	0	390.964	59	25	2079	4	4	326	34.6	6.32	6411.74	25	0.963	1.141	4.658	1	1	1	49.6	51.5	58.8	240	16.91	111.29	27.24	63.61	4.16648e+08	5.71773e+08	4.52475e+08	4.69919e+08	4.63105e+08	2.98194e+09	3.36599e+08	5.87513e+08	5.3635e+08	2.18905e+09	7.11433e+08	3.36035e+09	High	High	High	High	High	High	High
FALSE	High	Master Protein	Glyma.04G116500.3.p	PTHR24193//PTHR24193:SF88 - ANKYRIN REPEAT PROTEIN // SUBFAMILY NOT NAMED (1 of 2)	0	389.064	78	19	279	0	8	350	37.6	4.65	1043.96	19	0.256	0.562	1.518	1	1	1	30.7	119.9	67.4	182	120.56	24.92	73.55	43.01	2.81361e+07	3.55047e+07	2.5014e+08	1.26968e+08	1.38626e+08	1.98841e+08	7.79201e+07	7.53936e+07	2.46378e+08	1.47681e+08	2.10435e+08	3.44975e+08	High	High	High	High	High	High	High
FALSE	High	Master Protein	Glyma.08G332900.1.p	PTHR11528//PTHR11528:SF49 - HEAT SHOCK PROTEIN 90 // SUBFAMILY NOT NAMED (1 of 4)	0	388.18	42	34	285	1	1	699	80.1	5.06	757.72	34	1.392	1.533	3.685	1	0.767225	0.0348106	73.2	52.6	80.6	193.7	12.15	48.82	21.32	15.42	4.90373e+06	4.09878e+06	3.9218e+06	2.10524e+06	5.37056e+06	2.94415e+06	6.40753e+06	4.51466e+06	4.50297e+06	1.08498e+07	9.34192e+06	1.2719e+07	High	Peak Found	Not Found	High	High	Not Found	Not Found
FALSE	High	Master Protein	Glyma.12G210600.1.p	K01595 - phosphoenolpyruvate carboxylase (ppc) (1 of 10)	0	386.326	48	42	239	3	29	966	110.5	6.42	664.46	42	1.429	0.506	0.918	1	0.0467343	1	148.4	103.8	52.5	95.3	18.91	16.57	8.86	17.76	2.71334e+08	1.91254e+08	2.71486e+08	2.36533e+08	1.89896e+08	1.72569e+08	9.60234e+07	9.47012e+07	1.10745e+08	1.7424e+08	2.17144e+08	1.53927e+08	High	High	High	High	High	Peak Found	High
FALSE	High	Master Protein	Glyma.01G068000.1.p	K09487 - heat shock protein 90kDa beta (HSP90B, TRA1) (1 of 6)	0	382.465	52	32	274	3	3	793	90.1	5.01	834.88	32	1.381	1.297	0.428	1	1	0.767546	134.5	97.4	126.3	41.7	4.43	30.12	10.05	71.1	2.37657e+07	2.31672e+07	2.52366e+07	1.7214e+07	1.91089e+07	1.02333e+07	1.99942e+07	2.44658e+07	2.23202e+07	4.37409e+06	1.76543e+07	7.36406e+06	High	High	High	High	High	Peak Found	High
FALSE	High	Master Protein	Glyma.20G107800.1.p	1.1.1.29//1.1.1.81 - Glycerate dehydrogenase / Hydroxypyruvate reductase // Hydroxypyruvate reductase / D-glycerate dehydrogenase (1 of 2)	0	379.627	75	25	298	9	9	386	42.2	7.43	1009.97	25	0.702	0.467	0.484	1	0.678877	0.486847	105.9	150.8	70.4	72.9	17.84	30.84	24.67	41.08	8.3332e+07	6.26059e+07	6.13904e+07	8.91592e+07	1.05661e+08	5.52389e+07	4.0507e+07	6.15074e+07	4.1631e+07	2.97021e+07	6.76266e+07	4.31193e+07	High	High	High	High	High	High	High
FALSE	High	Master Protein	Glyma.05G055500.1.p	K02355 - elongation factor G (fusA, GFM, EFG) (1 of 3)	0	379.603	51	29	293	6	6	780	86	5.59	966.82	29	1.18	0.813	0.499	1	0.289133	0.00134829	135.2	114.6	93.1	57.1	10.52	7.1	3.81	10.9	8.42092e+07	7.20069e+07	8.85692e+07	8.01976e+07	7.08209e+07	7.13697e+07	6.16986e+07	5.80241e+07	5.76087e+07	2.95521e+07	3.62183e+07	3.56037e+07	High	High	High	High	High	Peak Found	High
FALSE	High	Master Protein	Glyma.12G059600.1.p	PTHR14194:SF38 - PROTEIN PLASTID TRANSCRIPTIONALLY ACTIVE 16 (1 of 2)	0	379.391	52	31	452	9	9	513	55	8.03	1530.69	31	1.321	1.51	1.37	1	0.552658	0.702324	101.6	76.9	116.1	105.4	13.31	45.56	6.22	9.43	4.01434e+08	3.8164e+08	4.87648e+08	3.03841e+08	4.24567e+08	1.5631e+08	4.58818e+08	4.36697e+08	4.93809e+08	3.82102e+08	4.16232e+08	4.61013e+08	High	High	High	High	High	High	High
FALSE	High	Master Protein	Glyma.15G250800.1.p	K11517 - (S)-2-hydroxy-acid oxidase (HAO) (1 of 7)	0	376.708	78	27	359	7	8	371	40.8	8.97	1122.34	27	0.809	0.301	0.189	1	0.512365	0.156422	140.8	174	52.4	32.9	25.25	36.66	38.11	70.9	6.66368e+08	5.40481e+08	3.96601e+08	8.57785e+08	6.67808e+08	3.91765e+08	1.97975e+08	3.68372e+08	2.01064e+08	1.26186e+08	3.47151e+08	1.00459e+08	High	High	High	High	High	High	High
FALSE	High	Master Protein	Glyma.15G102000.2.p	PTHR20852:SF53 - GLUTAMINE SYNTHETASE, CHLOROPLASTIC/MITOCHONDRIAL (1 of 4)	0	376.24	50	22	515	3	3	432	47.7	7.2	1687	22	1.519	1.932	0.269	1	0.907343	1	128.7	84.7	163.7	22.8	27.19	89.45	17.08	58.27	1.33324e+09	1.03256e+09	1.77908e+09	8.77541e+08	1.39498e+09	3.30762e+07	1.6957e+09	1.4693e+09	2.05882e+09	2.36451e+08	2.97433e+08	7.05809e+07	High	High	High	High	High	High	High
FALSE	High	Master Protein	Glyma.01G244900.1.p	K06972 - uncharacterized protein (K06972) (1 of 1)	0	369.497	50	45	266	45	45	1078	121.3	6.13	766.44	45	1.156	1.249	1.323	1	1	1	97.8	84.6	105.7	111.9	17.52	49.13	24.15	27.28	4.9124e+08	4.15888e+08	5.90287e+08	3.97328e+08	4.24826e+08	8.98608e+08	5.11093e+08	5.30628e+08	7.73398e+08	5.61956e+08	4.15925e+08	7.25527e+08	High	High	High	High	High	Peak Found	High
FALSE	High	Master Protein	Glyma.05G184800.1.p	PF15704 - Mitochondrial ATP synthase subunit (Mt_ATP_synt) (1 of 3)	0	367.914	70	28	380	0	4	241	27.5	6.44	1183.61	28	1.219	1.372	3.724	1	1	0.60121	66.7	54.7	75	203.6	66.61	65.64	63.76	15.86	3.53323e+07	2.08718e+07	7.82843e+07	2.6631e+07	2.89836e+07	7.86516e+07	2.6671e+07	3.97796e+07	8.94988e+07	1.07932e+08	1.20097e+08	8.71437e+07	High	High	High	High	High	High	Peak Found
FALSE	High	Master Protein	Glyma.18G289100.1.p	PTHR19375:SF232 - MEDIATOR OF RNA POLYMERASE II TRANSCRIPTION SUBUNIT 37E-RELATED (1 of 8)	0	362.03	46	27	379	2	2	649	71.2	5.22	1169.22	27	0.829	1.472	1.807	1	0.889328	0.973607	64.9	78.3	115.3	141.5	18.52	14.99	97.49	11.72	6.81495e+06	5.7052e+06	4.6904e+06	8.0014e+06	6.88509e+06	5.92432e+06	6.91567e+06	1.01372e+07	4.11935e+07	1.34493e+07	1.06324e+07	1.24417e+07	High	High	High	Peak Found	High	Not Found	High
FALSE	High	Master Protein	Glyma.08G224400.1.p	K02145 - V-type H+-transporting ATPase subunit A (ATPeV1A, ATP6A) (1 of 2)	0	359.787	66	35	251	2	35	623	68.7	5.67	758.8	35	0.994	0.909	0.506	1	1	0.731757	116.7	117.4	106.6	59.3	27.27	32.02	5.5	34.35	1.01192e+09	1.00746e+09	5.97619e+08	1.22073e+09	1.01338e+09	6.20737e+08	8.89766e+08	9.89988e+08	9.20763e+08	5.12376e+08	4.69089e+08	8.5246e+08	High	High	High	High	High	High	High
FALSE	High	Master Protein	Glyma.08G165400.1.p	PTHR11406:SF9 - PHOSPHOGLYCERATE KINASE (1 of 2)	0	359.755	75	26	379	3	3	401	42.4	6.73	1257.46	26	2.066	2.473	5.263	0.868417	0.639348	0.136803	76.5	37	91.6	194.9	49.68	77.67	27.1	24.1	1.17832e+07	1.33325e+07	2.76252e+07	1.38056e+07	6.45229e+06	2.28051e+06	1.20067e+07	1.59587e+07	2.08035e+07	2.31496e+07	3.78832e+07	3.39577e+07	High	High	High	High	High	Peak Found	Peak Found
FALSE	High	Master Protein	Glyma.12G087100.1.p	PTHR13140//PTHR13140:SF460 - MYOSIN // SUBFAMILY NOT NAMED (1 of 1)	0	358.768	54	44	322	0	31	738	82.7	5.41	912.8	44	1.101	2.186	0.514	1	0.749587	1	91.7	83.3	182.1	42.8	39.74	60.99	43.9	14.68	1.55723e+09	8.85836e+08	7.68855e+08	8.04911e+08	1.06854e+09	2.31561e+08	2.04317e+09	1.75918e+09	7.68923e+08	4.93367e+08	4.13896e+08	3.70075e+08	High	High	High	High	High	High	High
FALSE	High	Master Protein	Glyma.18G074100.1.p	PTHR11528//PTHR11528:SF49 - HEAT SHOCK PROTEIN 90 // SUBFAMILY NOT NAMED (1 of 4)	0	358.186	42	35	271	2	4	702	80.3	5.02	716.32	35	1.011	0.94	0.695	1	1	1	110.9	109.7	103.1	76.3	33.64	10.86	31.32	27.34	4.61585e+07	3.15264e+07	2.3757e+07	3.54287e+07	3.11745e+07	2.86059e+07	4.5194e+07	29306129	2.55135e+07	2.16793e+07	3.18798e+07	1.93952e+07	High	High	High	High	High	Peak Found	High
FALSE	High	Master Protein	Glyma.15G262100.1.p	PTHR11406:SF9 - PHOSPHOGLYCERATE KINASE (1 of 2)	0	357.116	71	25	393	2	2	401	42.4	6.32	1292.45	25	1.425	1.386	1.317	1	1	0.78592	111.2	78	108.1	102.7	20.87	68.22	19.53	62.55	2.21667e+07	2.51823e+07	3.29975e+07	2.93832e+07	1.76687e+07	5.48856e+06	1.97398e+07	2.44873e+07	2.93172e+07	2.13891e+07	6.01293e+07	2.32629e+07	High	High	High	High	High	High	High
FALSE	High	Master Protein	Glyma.06G320200.1.p	PTHR24193//PTHR24193:SF88 - ANKYRIN REPEAT PROTEIN // SUBFAMILY NOT NAMED (1 of 2)	0	355.252	68	17	269	6	6	352	37.9	4.65	1001.83	17	1.528	1.154	2.516	1	1	0.584747	98.6	64.5	74.5	162.4	31.79	51.14	65.33	52.17	1.68884e+08	1.52389e+08	2.67812e+08	1.10503e+08	9.46424e+07	2.30462e+08	1.27512e+08	8.90097e+07	3.00354e+08	2.1527e+08	2.78055e+08	5.58928e+08	High	High	High	High	High	High	High
FALSE	High	Master Protein	Glyma.13G210800.2.p	PTHR20852:SF53 - GLUTAMINE SYNTHETASE, CHLOROPLASTIC/MITOCHONDRIAL (1 of 4)	0	353.234	50	21	533	1	2	432	47.6	6.87	1716.48	21	0.991	1.086	0.131	1	1	1	123.5	124.7	135.4	16.4	62.98	75.68	70.92	89.67	1.33237e+09	1.35514e+09	2.68981e+08	1.34444e+09	1.49057e+09	1.28695e+08	1.95991e+09	1.46039e+09	2.64736e+08	6.31857e+08	1.7676e+08	1.2474e+08	High	High	High	High	High	High	High
FALSE	High	Master Protein	Glyma.05G043200.1.p	K11294 - nucleolin (NCL, NSR1) (1 of 11)	0	349.37	62	16	635	13	13	299	32.9	4.93	2316.07	16	1.105	0.931	3.689	1	1	0.963581	65.7	59.5	55.4	219.4	97.26	69.4	100.75	26.25	1.07363e+09	1.03068e+09	5.09408e+09	9.05023e+08	9.71735e+08	2.81918e+09	7.91912e+08	9.04336e+08	4.38254e+09	2.38226e+09	4.0978e+09	3.58513e+09	High	High	High	High	High	High	High
FALSE	High	Master Protein	Glyma.08G175800.1.p	K11517 - (S)-2-hydroxy-acid oxidase (HAO) (1 of 7)	0	347.575	77	27	371	2	8	371	40.8	9.13	1100.18	27	0.782	0.437	0.192	1	1	0.554165	129.8	165.9	72.5	31.8	27.83	60.62	16.69	76.89	7.88161e+08	6.35369e+08	4.42652e+08	9.13311e+08	8.12137e+08	1.95938e+08	3.54893e+08	4.21644e+08	3.01939e+08	8.35012e+07	3.93366e+08	1.55705e+08	High	High	High	High	High	High	High
FALSE	High	Master Protein	Glyma.04G193500.1.p	PTHR10836//PTHR10836:SF44 - GLYCERALDEHYDE 3-PHOSPHATE DEHYDROGENASE // SUBFAMILY NOT NAMED (1 of 4)	0	347.091	77	23	345	3	5	338	36.8	7.58	1143.38	23	0.605	0.32	0.197	1	0.501	0.092239	114.1	188.5	60.3	37.1	26.77	51.43	35.9	38.95	2.57994e+08	3.09243e+08	1.77411e+08	5.58558e+08	4.26415e+08	1.69406e+08	9.54635e+07	1.97517e+08	1.36278e+08	8.40182e+07	1.08086e+08	4.6591e+07	High	High	High	High	High	High	High
FALSE	High	Master Protein	Glyma.04G247900.1.p	PF00085//PF13098//PF13848 - Thioredoxin (Thioredoxin) // Thioredoxin-like domain (Thioredoxin_2) // Thioredoxin-like domain (Thioredoxin_6) (1 of 2)	0	345.741	67	31	326	3	11	525	58.7	5.17	1084.47	31	1.068	1.421	2.854	1	1	0.536508	67.3	63.1	89.6	180	53.17	72.6	37.85	14.57	8.23189e+07	8.97009e+07	2.00057e+08	6.14615e+07	8.39857e+07	2.28051e+08	6.97459e+07	1.19377e+08	1.56729e+08	2.39715e+08	3.02212e+08	2.34385e+08	High	High	High	High	High	High	High
FALSE	High	Master Protein	Glyma.16G127300.1.p	1.6.99.1 - NADPH dehydrogenase / NADPH diaphorase (1 of 3)	0	344.689	61	24	448	0	1	362	40.5	7.93	1401.85	24	2.329	4.227	1.554	1	0.249555	0.781054	102.3	43.9	185.6	68.2	65.03	48.38	29.17	96.23	1.02831e+08	4.50121e+07	1.90789e+08	4.41559e+07	4.843e+07	1.61457e+07	1.86632e+08	165586736	2.81219e+08	6.86282e+07	2.55387e+08	4.03105e+07	High	High	High	High	High	Peak Found	High
FALSE	High	Master Protein	Glyma.02G047600.1.p	1.6.99.1 - NADPH dehydrogenase / NADPH diaphorase (1 of 3)	0	339.849	60	23	434	2	2	362	40.4	8.21	1397.2	23	1.002	0.809	0.23	1	1	0.249793	131.8	131.5	106.4	30.3	36.28	53.5	37.37	34.82	2.56245e+08	2.64468e+08	1.25251e+08	2.55655e+08	2.62381e+08	7.57195e+07	2.23293e+08	2.06909e+08	1.01297e+08	5.89263e+07	5.97967e+07	2.95639e+07	High	High	High	High	High	High	High
FALSE	High	Master Protein	Glyma.19G106800.1.p	K05298 - glyceraldehyde-3-phosphate dehydrogenase (NADP+) (phosphorylating) (GAPA) (1 of 4)	0	338.077	65	25	1044	2	2	403	43.2	8.25	2933.76	25	0.985	0.481	0.864	1	1	1	118.3	120.1	57.7	103.8	43.47	60.66	16.35	68.35	3.31196e+08	3.59445e+08	1.38642e+08	5.59163e+08	3.36142e+08	1.40577e+08	1.35189e+08	188023772	1.61613e+08	5.8729e+08	2.90563e+08	1.33549e+08	High	High	High	High	High	High	High
FALSE	High	Master Protein	Glyma.06G172600.1.p	PTHR10836//PTHR10836:SF44 - GLYCERALDEHYDE 3-PHOSPHATE DEHYDROGENASE // SUBFAMILY NOT NAMED (1 of 4)	0	337.594	77	21	315	0	2	338	36.7	7.24	1042.25	21	0.875	0.259	0.312	1	1	1	143.1	163.5	42.4	51	20.93	82.96	66.66	19.69	1.12012e+08	1.53288e+08	1.05599e+08	1.57456e+08	1.27992e+08	5.64719e+06	2.97656e+07	9.03811e+07	3.31473e+07	3.39696e+07	5.00643e+07	3.99275e+07	High	High	High	High	High	High	High
FALSE	High	Master Protein	Glyma.05G041900.2.p	K02358 - elongation factor Tu (tuf, TUFM) (1 of 8)	0	337.374	56	19	382	4	7	479	52.5	6.81	1399.09	19	1.059	0.67	1.08	1	1	1	111.2	105	70.3	113.4	27.81	55.31	23.54	20.07	1.11326e+08	1.41867e+08	8.00804e+07	1.19911e+08	1.05128e+08	3.15781e+07	7.03949e+07	9.05248e+07	5.65822e+07	1.13559e+08	1.19014e+08	8.0343e+07	High	High	High	High	High	High	High
FALSE	High	Master Protein	Glyma.06G015900.1.p	K05298 - glyceraldehyde-3-phosphate dehydrogenase (NADP+) (phosphorylating) (GAPA) (1 of 4)	0	335.53	59	26	637	0	3	453	48.4	7.2	1976.69	26	1.017	0.804	0.556	1	1	1	120.4	118.5	95.2	65.9	45.32	63.35	36.1	66.61	5.56861e+08	6.34913e+08	2.30054e+08	5.90515e+08	5.47796e+08	1.13013e+08	4.40426e+08	6.33873e+08	3.03863e+08	3.75641e+08	3.04581e+08	6.15642e+07	High	High	High	High	High	High	High
FALSE	High	Master Protein	Glyma.16G044900.1.p	K05298 - glyceraldehyde-3-phosphate dehydrogenase (NADP+) (phosphorylating) (GAPA) (1 of 4)	0	333.005	61	24	1049	1	1	403	43.2	7.75	2925.5	24	0.666	0.395	0.686	1	0.889328	1	96.9	145.6	57.6	99.8	44.4	63.71	80.75	70.83	2.60123e+08	3.29556e+08	1.22481e+08	5.85856e+08	3.9079e+08	1.21445e+08	9.33128e+06	154426938	1.85277e+08	5.619e+08	2.67897e+08	1.21022e+08	High	High	High	High	High	High	High
FALSE	High	Master Protein	Glyma.04G017500.1.p	K03781 - catalase (katE, CAT, catB, srpA) (1 of 4)	0	332.915	55	19	288	1	3	492	56.7	7.28	991.54	19	0.855	0.676	0.13	1	1	0.873521	128.5	150.3	101.7	19.5	74.84	62.75	77.01	31.76	1.40053e+08	1.423e+08	1.34052e+07	1.6385e+08	1.67385e+08	3.35055e+07	1.33146e+08	1.10838e+08	1.05059e+07	3.16231e+07	1.722e+07	2.12922e+07	High	High	Peak Found	High	High	High	High
FALSE	High	Master Protein	Glyma.10G281400.1.p	1.1.1.29//1.1.1.81 - Glycerate dehydrogenase / Hydroxypyruvate reductase // Hydroxypyruvate reductase / D-glycerate dehydrogenase (1 of 2)	0	331.752	69	21	265	1	5	386	42.2	7.44	857.78	21	0.702	0.609	0.343	1	0.606832	0.0698649	105.8	150.7	91.8	51.7	22.01	8.71	8.76	49.44	8.63592e+07	5.55684e+07	6.87036e+07	1.0727e+08	9.78217e+07	9.0152e+07	5.31307e+07	6.32801e+07	5.9622e+07	2.28386e+07	6.01505e+07	3.35732e+07	High	High	High	High	High	High	High
FALSE	High	Master Protein	Glyma.03G230000.1.p	KOG1429//KOG1430 - dTDP-glucose 4-6-dehydratase/UDP-glucuronic acid decarboxylase // C-3 sterol dehydrogenase/3-beta-hydroxysteroid dehydrogenase and related dehydrogenases (1 of 1)	0	331.653	67	24	403	9	9	378	42	7.9	1220.64	24	1.011	0.584	0.218	1	1	0.815408	143.8	142.2	83.1	30.9	29.32	62.13	44.73	44.85	1.04652e+09	1.00291e+09	5.81094e+08	1.04972e+09	9.91946e+08	2.13434e+08	5.79648e+08	8.61185e+08	3.32718e+08	2.15878e+08	4.34148e+08	2.08163e+08	High	High	High	High	High	High	High
FALSE	High	Master Protein	Glyma.04G015900.3.p	K05298 - glyceraldehyde-3-phosphate dehydrogenase (NADP+) (phosphorylating) (GAPA) (1 of 4)	0	327.057	64	27	604	1	4	451	48.1	7.43	1855.85	27	0.825	0.709	0.501	1	1	1	108.7	131.8	93.4	66.1	26.65	68.94	23.89	41.27	3.35294e+08	3.87321e+08	2.22965e+08	4.06419e+08	4.5852e+08	6.50742e+07	2.87972e+08	3.14133e+08	1.93666e+08	2.03717e+08	3.30913e+08	1.47742e+08	High	High	High	High	High	High	High
FALSE	High	Master Protein	Glyma.12G232900.1.p	K02634 - apocytochrome f (petA) (1 of 1)	0	326.691	59	22	387	22	22	320	35.3	8.82	1384.91	22	0.832	0.723	0.38	1	1	0.574294	113.4	136.3	98.5	51.8	30.19	46.44	35.18	7.22	2.23453e+09	2.25267e+09	1.2446e+09	2.68473e+09	3.08212e+09	1.08003e+09	1.9413e+09	2.47482e+09	1.17145e+09	1.11421e+09	1.02056e+09	9.66791e+08	High	High	High	High	High	High	High
FALSE	High	Master Protein	Glyma.08G142800.1.p	PF15704 - Mitochondrial ATP synthase subunit (Mt_ATP_synt) (1 of 3)	0	324.333	70	26	353	1	2	241	27.5	6.84	1034.79	26	1.951	1.802	6.149	0.667755	0.836891	0.0109168	71.6	36.7	66.1	225.6	24.44	45.97	20.18	23.41	9.86478e+06	9.60995e+06	1.45312e+07	5.05742e+06	4.35062e+06	9.75265e+06	7.82083e+06	9.11367e+06	1.1597e+07	2.47672e+07	3.1098e+07	3.96185e+07	High	High	High	High	High	High	Not Found
FALSE	High	Master Protein	Glyma.07G185400.1.p	PTHR11540:SF21 - MALATE DEHYDROGENASE, GLYOXYSOMAL (1 of 2)	0	322.964	60	13	229	0	5	356	37.4	8.29	963.49	13	1.156	0.899	0.285	1	1	0.933871	138.5	119.7	107.7	34.1	18.2	47.01	17.17	79.94	3.06335e+08	3.9067e+08	4.43499e+08	3.78523e+08	3.3781e+08	1.30927e+08	2.43778e+08	3.03812e+08	3.45416e+08	9.62119e+07	3.29315e+08	8.83085e+07	High	High	High	High	High	High	High
FALSE	High	Master Protein	Glyma.06G114400.1.p	PTHR31356:SF1 - L-ASCORBATE PEROXIDASE S, CHLOROPLASTIC/MITOCHONDRIAL-RELATED (1 of 2)	0	318.454	49	20	286	3	7	432	47.1	7.56	1079.52	20	1.077	1.04	1.968	1	1	1	84.7	78.7	81.8	154.8	15.59	66.66	31.89	35.46	9.13446e+07	1.2159e+08	1.21265e+08	1.12609e+08	1.11344e+08	3.22123e+08	7.98971e+07	1.17146e+08	1.5466e+08	3.38757e+08	1.7026e+08	2.21607e+08	High	High	High	High	High	High	High
FALSE	High	Master Protein	Glyma.02G302500.1.p	PTHR11528//PTHR11528:SF49 - HEAT SHOCK PROTEIN 90 // SUBFAMILY NOT NAMED (1 of 4)	0	318.175	40	33	240	6	13	702	80.3	5.06	656.71	33	1.056	0.792	0.806	1	1	1	115.6	109.5	86.7	88.2	7.82	26.43	20.4	44.64	1.92387e+08	1.78092e+08	1.64511e+08	1.68716e+08	1.80575e+08	1.05947e+08	1.11279e+08	1.33555e+08	1.66922e+08	1.35976e+08	1.68286e+08	6.19817e+07	High	High	High	High	High	Peak Found	High
FALSE	High	Master Protein	Glyma.07G258500.1.p	PTHR22572:SF119 - GLUCOSE-1-PHOSPHATE ADENYLYLTRANSFERASE LARGE SUBUNIT 1, CHLOROPLASTIC (1 of 2)	0	317.954	61	28	213	0	3	520	57.8	8.47	664.17	28	1.82	1.502	0.01	0.0441796	0.0915055		168.4	92.5	139		14.45	12.09	16.47		1.52303e+07	1.21347e+07	1.18122e+07	6.88717e+06	5.46379e+06	6.66701e+06	1.26556e+07	1.00158e+07	9.32682e+06				High	High	Not Found	High	High	Not Found	High
FALSE	High	Master Protein	Glyma.17G015600.1.p	PTHR22572:SF119 - GLUCOSE-1-PHOSPHATE ADENYLYLTRANSFERASE LARGE SUBUNIT 1, CHLOROPLASTIC (1 of 2)	0	315.671	60	27	218	2	2	523	58.1	8.34	669.56	27	1.188	0.456	0.339	1	0.0368177	0.0105304	159.3	134.1	61.2	45.4	5.91	9.88	29.83	16.73	1.84568e+07	1.74191e+07	1.9603e+07	1.55361e+07	1.46483e+07	1.77149e+07	9.79847e+06	5.40665e+06	7.08476e+06	5.09469e+06	5.26143e+06	6.83164e+06	High	High	High	High	High	Not Found	High
FALSE	High	Master Protein	Glyma.18G244900.1.p	K19269 - phosphoglycolate phosphatase (PGP, PGLP) (1 of 3)	0	310.369	52	17	236	0	2	368	40.7	7.68	816.66	17	1.299	1.421	0.812	1	1	1	114.6	88.3	125.4	71.6	41.64	52.53	53.6	73.41	5.98298e+07	7.18441e+07	1.27192e+08	8.06544e+07	5.53101e+07	2.45385e+07	3.08861e+07	7.86138e+07	1.07796e+08	4.48941e+07	1.19705e+08	3.07525e+07	High	High	High	High	High	High	High
FALSE	High	Master Protein	Glyma.20G212900.1.p	K08916 - light-harvesting complex II chlorophyll a/b binding protein 5 (LHCB5) (1 of 4)	0	309.583	50	17	437	1	9	288	30.9	6.81	1212.29	17	0.72	0.893	0.359	1	1	0.801308	97	134.6	120.2	48.3	12.69	57.58	52.04	57.32	3.27335e+08	2.5539e+08	2.8049e+08	3.89427e+08	5.8993e+08	1.54974e+08	5.13718e+08	3.47581e+08	1.59717e+08	1.39625e+08	2.79036e+08	9.13885e+07	High	High	High	High	High	High	High
FALSE	High	Master Protein	Glyma.06G017900.1.p	K03781 - catalase (katE, CAT, catB, srpA) (1 of 4)	0	309.435	52	18	279	0	2	492	56.7	7.25	947.9	18	0.951	0.976	0.694	1	1	1	105.1	110.4	107.8	76.7	38.6	64.82	34.99	82.52	6.86554e+07	6.53776e+07	1.24583e+08	8.82095e+07	7.21553e+07	1.57538e+07	7.04495e+07	54321065	1.07097e+08	4.08893e+07	1.69219e+08	5.01042e+07	High	High	High	High	High	High	Peak Found
FALSE	High	Master Protein	Glyma.19G227700.2.p	PTHR10366:SF289 - CHLOROPLAST STEM-LOOP BINDING PROTEIN OF 41 KDA B, CHLOROPLASTIC (1 of 2)	0	308.604	68	23	345	0	8	378	42.2	7.9	1048.45	23	0.973	0.528	0.208	1	1	0.291982	143.6	147.6	78	30.7	13.33	49.78	33.62	71.3	4.42524e+08	4.19445e+08	3.40636e+08	4.51848e+08	4.31097e+08	1.46207e+08	2.27753e+08	3.30704e+08	1.69568e+08	8.97086e+07	1.71433e+08	3.25514e+07	High	High	High	High	High	High	High
FALSE	High	Master Protein	Glyma.09G247900.1.p	K19269 - phosphoglycolate phosphatase (PGP, PGLP) (1 of 3)	0	308.194	54	18	240	0	3	369	40.9	7.96	749.85	18	1.044	0.851	0.396	1	1	1	126.9	121.6	103.4	48.1	12.42	78	135.26	142.66	2.12105e+08	2.26085e+08	2.6827e+08	2.97768e+08	2.16529e+08	2.47951e+07	1.21045e+08	1.84183e+08	1.78048e+09	8.56976e+07	1.21078e+09	7.56482e+07	High	High	High	High	High	High	High
FALSE	High	Master Protein	Glyma.19G147900.2.p	PTHR11937//PTHR11937:SF210 - ACTIN // SUBFAMILY NOT NAMED (1 of 1)	0	307.525	59	17	256	1	1	377	41.7	5.49	795.75	17	0.927	1.264	0.288	1	1	0.536049	106.6	115	145.3	33.1	36.43	20.78	33.76	85.62	2.73762e+07	2.18668e+07	1.25369e+07	1.6896e+07	2.35901e+07	2.56636e+07	2.98083e+07	3.03065e+07	1.53554e+07	6.78264e+06	2.06393e+07	3.91558e+06	Peak Found	High	Peak Found	High	High	Not Found	High
FALSE	High	Master Protein	Glyma.04G215900.2.p	PTHR11937//PTHR11937:SF247 - ACTIN // SUBFAMILY NOT NAMED (1 of 4)	0	307.185	59	17	263	0	5	377	41.7	5.49	816.99	17	1.074	0.898	0.398	1	1	0.193769	127.5	118.7	106.6	47.2	25.08	17.68	9.18	38.42	1.713e+08	1.82739e+08	1.10479e+08	1.59532e+08	1.73791e+08	1.21858e+08	1.2566e+08	1.43225e+08	1.50647e+08	5.96168e+07	1.1402e+08	6.34429e+07	High	High	High	High	High	High	High
FALSE	High	Master Protein	Glyma.11G042200.1.p	PTHR11715:SF1 - GLYCINE CLEAVAGE SYSTEM H PROTEIN 3, MITOCHONDRIAL (1 of 2)	0	304.211	81	13	956	0	2	165	17.9	5.2	3468.04	13	0.575	0.094	5.973	1	0.160654	1	30.1	52.3	4.9	312.6	24.31	153.04	88.44	62.07	1.60485e+07	2.32679e+07	1.524e+07	2.79033e+07	2.07802e+07	5.78274e+08	602893	5.96729e+06	2.62076e+06	3.39123e+08	9.6876e+07	1.66658e+08	High	High	Not Found	High	High	High	High
FALSE	High	Master Protein	Glyma.04G247700.1.p	K01698 - porphobilinogen synthase (hemB, ALAD) (1 of 1)	0	301.487	56	16	168	6	16	414	45.2	6.8	676.8	16	0.956	0.576	0.334	1	1	0.792459	133.4	139.6	80.4	46.6	35.73	55.78	13.17	29.47	3.74905e+08	5.17754e+08	2.46546e+08	4.44378e+08	3.92145e+08	1.15145e+08	2.25757e+08	2.77212e+08	2.1935e+08	1.13016e+08	1.95106e+08	1.31035e+08	High	High	High	High	High	High	High
FALSE	High	Master Protein	Glyma.06G172700.1.p	PTHR10836//PTHR10836:SF44 - GLYCERALDEHYDE 3-PHOSPHATE DEHYDROGENASE // SUBFAMILY NOT NAMED (1 of 4)	0	301.235	77	22	303	3	3	338	36.7	7.24	948.39	22	2.505	1.374	1.083	1	1	1	168.1	67.1	92.2	72.7	18.3	54.86	52.92	74.58	1.70049e+08	1.52431e+08	1.17339e+08	8.46487e+07	6.08413e+07	2.33913e+07	8.3582e+07	58912202	1.61702e+08	1.82726e+07	1.19471e+08	6.59116e+07	High	High	High	High	High	Peak Found	High
FALSE	High	Master Protein	Glyma.19G183400.1.p	K13525 - transitional endoplasmic reticulum ATPase (VCP, CDC48) (1 of 11)	0	300.806	42	30	263	0	2	808	89.7	5.24	747.64	30	1.023	0.327	1.121	1	0.00319345	0.767546	117.9	115.2	37.7	129.2	8.31	10.08	6.44	22.4	7.67886e+06	8.36913e+06	9.07052e+06	8.72843e+06	8.17767e+06	7.13756e+06	2.90403e+06	2561379	2.67245e+06	8.11225e+06	9.16745e+06	1.23634e+07	High	High	High	High	High	Peak Found	Not Found
FALSE	High	Master Protein	Glyma.03G144800.5.p	PTHR11937//PTHR11937:SF255 - ACTIN // SUBFAMILY NOT NAMED (1 of 9)	0	299.086	59	17	249	1	1	377	41.6	5.49	773.72	17	0.94	1.157	0.903	1	1	1	94	100	115.7	90.3	10.84	29.91	30.85	75.52	7.50904e+06	6.82149e+06	6.03766e+06	7.25528e+06	9.3459e+06	5.03334e+06	4.64746e+06	8393067	8.60219e+06	6.55302e+06	1.04221e+07	1.27192e+06	Peak Found	Peak Found	Not Found	High	High	Not Found	Peak Found
FALSE	High	Master Protein	Glyma.03G190500.1.p	PTHR11902//PTHR11902:SF18 - ENOLASE // SUBFAMILY NOT NAMED (1 of 4)	0	298.303	59	23	264	6	6	444	47.6	5.69	851.36	23	0.96	0.773	0.773	1	1	0.772727	109.5	114.1	88.2	88.2	6.05	21.84	24.56	36.1	6.53644e+07	6.5541e+07	5.88247e+07	7.34347e+07	6.81e+07	4.73984e+07	7.63631e+07	5.2629e+07	4.96804e+07	5.26671e+07	5.29871e+07	2.54949e+07	High	High	High	High	High	High	High
FALSE	High	Master Protein	Glyma.02G138400.1.p	PTHR10314:SF110 - CYSTEINE SYNTHASE (1 of 2)	0	297.915	67	17	221	5	5	394	41.6	7.31	874.78	17	1.002	0.536	0.378	1	0.959662	0.119771	137.4	137.2	73.5	51.9	7.5	34.28	20.11	30.82	1.2831e+08	1.27386e+08	1.11944e+08	1.39298e+08	1.27175e+08	6.79012e+07	6.14672e+07	89581489	6.81134e+07	3.04561e+07	5.82235e+07	4.80813e+07	High	High	Peak Found	High	High	High	High
FALSE	High	Master Protein	Glyma.08G182200.1.p	PTHR11937//PTHR11937:SF247 - ACTIN // SUBFAMILY NOT NAMED (1 of 4)	0	297.093	59	17	245	1	7	377	41.6	5.49	778.66	17	0.868	0.888	0.891	1	1	1	95.2	109.7	97.4	97.7	24.65	16.55	16.2	17.99	1.34562e+08	9.55904e+07	8.54373e+07	1.27291e+08	1.10164e+08	9.10664e+07	9.87061e+07	97823765	7.30602e+07	7.05856e+07	9.853e+07	9.8169e+07	High	High	High	High	High	High	High
FALSE	High	Master Protein	Glyma.04G248300.1.p	PTHR31356:SF1 - L-ASCORBATE PEROXIDASE S, CHLOROPLASTIC/MITOCHONDRIAL-RELATED (1 of 2)	0	296.832	50	21	304	0	8	435	47.3	7.85	1085.86	21	0.709	0.797	1.544	1	1	1	70.1	98.8	78.7	152.5	12.37	62.93	22.72	33.82	9.4569e+07	9.61032e+07	1.17291e+08	1.35481e+08	9.55339e+07	3.08445e+08	1.08001e+08	9.61735e+07	1.46999e+08	2.52654e+08	1.23083e+08	2.09181e+08	High	High	High	High	High	High	High
FALSE	High	Master Protein	Glyma.02G233700.1.p	PF16940 - Chloroplast envelope transporter (Tic110) (1 of 4)	0	296.203	43	36	238	12	12	995	109.9	6.33	643.34	36	1.183	1.001	0.615	1	1	0.795208	124.6	105.3	105.4	64.8	42.16	9.57	26.93	23.16	6.48017e+07	3.62855e+07	8.99511e+07	5.92278e+07	5.47823e+07	4.88726e+07	5.97864e+07	3.45193e+07	5.48286e+07	3.36976e+07	4.48362e+07	2.86652e+07	High	High	High	High	High	High	High
FALSE	High	Master Protein	Glyma.14G176900.1.p	PTHR18860//PTHR18860:SF26 - 14-3-3 PROTEIN // SUBFAMILY NOT NAMED (1 of 5)	0	295.556	56	21	356	0	8	314	35.2	4.81	1033.01	21	2.615	1.678	2.804	0.973187	1	0.627846	129.2	49.4	82.9	138.5	22.99	26.5	55.46	84.85	5.31409e+08	5.0093e+08	7.51444e+08	2.87664e+08	2.03228e+08	1.74591e+08	3.13227e+08	3.40968e+08	7.88441e+08	2.2169e+08	1.45345e+09	5.69828e+08	High	High	High	High	High	High	High
FALSE	High	Master Protein	Glyma.19G190900.1.p	PTHR11902//PTHR11902:SF19 - ENOLASE // SUBFAMILY NOT NAMED (1 of 1)	0	295.047	59	23	265	6	6	444	47.6	5.57	847.07	23	1.217	1.02	0.787	1	1	1	121	99.4	101.4	78.2	41.86	28.43	40.35	31.9	1.36458e+08	1.51843e+08	6.08381e+07	1.1216e+08	1.34508e+08	7.43233e+07	1.27421e+08	1.1435e+08	5.3119e+07	1.30389e+08	7.05396e+07	8.8247e+07	High	High	High	High	High	High	High
FALSE	High	Master Protein	Glyma.11G139800.1.p	PTHR11937//PTHR11937:SF255 - ACTIN // SUBFAMILY NOT NAMED (1 of 9)	0	294.865	59	17	249	0	2	377	41.6	5.49	732.6	17	0.842	0.787	0.622	1	1	0.457544	103.6	123	96.9	76.5	27.62	4.02	42.69	13.13	8.48581e+06	8.24218e+06	1.31188e+07	1.06714e+07	9.8834e+06	1.00785e+07	5.4488e+06	7.93669e+06	1.27672e+07	5.17374e+06	6.72102e+06	6.26499e+06	High	High	Peak Found	High	High	Not Found	Peak Found
FALSE	High	Master Protein	Glyma.19G077800.1.p	K01255 - leucyl aminopeptidase (CARP, pepA) (1 of 3)	0	294.131	56	27	257	24	24	582	60.8	6.8	895.59	27	0.968	0.786	0.816	1	0.678272	0.71014	108.5	112	88.1	91.4	13.56	4	18.18	24.7	6.14329e+08	5.25753e+08	4.70013e+08	5.77962e+08	5.42992e+08	5.37088e+08	4.73026e+08	4.26819e+08	3.27487e+08	4.43032e+08	3.14307e+08	5.23296e+08	High	High	High	High	High	High	High
FALSE	High	Master Protein	Glyma.12G037400.1.p	PTHR11627:SF16 - FRUCTOSE-BISPHOSPHATE ALDOLASE 1, CHLOROPLASTIC-RELATED (1 of 4)	0	291.213	68	27	534	2	17	398	42.8	7.33	1419.55	27	1.122	0.885	0.284	1	1	1	136.4	121.6	107.5	34.5	22.82	75.58	32.87	88.76	4.63075e+09	4.51275e+09	2.97791e+09	4.02267e+09	4.1123e+09	3.61153e+08	3.55845e+09	3.81333e+09	1.93363e+09	1.14284e+09	4.46735e+09	1.01018e+09	High	High	High	High	High	High	High
FALSE	High	Master Protein	Glyma.14G210700.1.p	K00963 - UTP--glucose-1-phosphate uridylyltransferase (UGP2, galU, galF) (1 of 3)	0	289.848	72	29	194	15	15	469	51.4	5.34	610.96	29	1.102	1.003	0.2	1	1	0.00888312	133.3	121	121.4	24.3	19.18	6.28	19.15	44.19	1.32439e+08	1.51158e+08	1.02261e+08	1.20201e+08	1.21591e+08	1.08254e+08	1.63165e+08	1.17249e+08	1.20591e+08	2.40936e+07	3.44532e+07	1.32912e+07	High	High	High	High	High	High	High
FALSE	High	Master Protein	Glyma.13G130900.1.p	PTHR19375:SF232 - MEDIATOR OF RNA POLYMERASE II TRANSCRIPTION SUBUNIT 37E-RELATED (1 of 8)	0	289	44	25	329	6	6	632	69.2	5.25	1011.3	25	0.911	1.118	0.577	1	1	0.0128761	101	110.9	124	64	5.68	13.33	4.01	15.53	3.03971e+07	3.15545e+07	2.81926e+07	2.97537e+07	3.8752e+07	3.33743e+07	3.58949e+07	3.8888e+07	3.73214e+07	1.52938e+07	1.92573e+07	2.08704e+07	High	High	High	High	High	Not Found	High
FALSE	High	Master Protein	Glyma.06G114800.1.p	PF00085//PF13098//PF13848 - Thioredoxin (Thioredoxin) // Thioredoxin-like domain (Thioredoxin_2) // Thioredoxin-like domain (Thioredoxin_6) (1 of 2)	0	288.36	70	30	303	2	10	503	56.1	4.98	918.65	30	1.3	1.83	2.822	1	1	0.261767	74.8	57.5	105.3	162.4	25.39	53.18	14.62	11.52	5.46214e+07	7.22365e+07	9.15744e+07	5.20569e+07	5.55565e+07	1.25229e+08	9.04827e+07	1.01686e+08	1.20633e+08	1.60865e+08	1.56776e+08	1.29309e+08	High	High	High	High	High	High	High
FALSE	High	Master Protein	Glyma.18G138300.1.p	PTHR11695//PTHR11695:SF552 - ALCOHOL DEHYDROGENASE RELATED // SUBFAMILY NOT NAMED (1 of 2)	0	287.826	68	25	406	9	9	395	41.9	8.94	1328.87	25	1.411	1.215	1.482	1	1	0.533287	110.5	78.3	95.1	116.1	9.69	29.17	33.69	26.7	3.94631e+08	4.75322e+08	4.60684e+08	3.27684e+08	3.26473e+08	1.85646e+08	2.59025e+08	3.96602e+08	5.23871e+08	5.94236e+08	4.83882e+08	3.42097e+08	High	High	High	High	High	High	High
FALSE	High	Master Protein	Glyma.11G224600.1.p	PTHR10795//PTHR10795:SF348 - PROPROTEIN CONVERTASE SUBTILISIN/KEXIN // SUBFAMILY NOT NAMED (1 of 14)	0	286.991	39	23	194	15	15	738	78.9	7.61	711.73	23	0.779	0.41	0.375	1	1	0.618224	121.5	156	64	58.5	21.26	45.86	40.01	32.5	1.9285e+08	2.64293e+08	1.80591e+08	2.76146e+08	2.4759e+08	9.88829e+07	8.92759e+07	1.8051e+08	1.01508e+08	1.35038e+08	7.12989e+07	9.29013e+07	High	High	High	High	High	High	High
FALSE	High	Master Protein	Glyma.05G219400.1.p	K09490 - heat shock 70kDa protein 5 (HSPA5, BIP) (1 of 4)	0	286.431	47	31	289	2	2	668	73.6	5.19	837.13	31	0.891	1.594	1.409	1	0.0277281	0.118415	72.8	81.7	130.3	115.1	8.11	10.11	6.79	13.29	5.63219e+06	6.57664e+06	6.40656e+06	6.04682e+06	7.29274e+06	7.19193e+06	1.02728e+07	11466153	1.16747e+07	1.03409e+07	1.01315e+07	8.05417e+06	High	High	Not Found	High	High	High	High
FALSE	High	Master Protein	Glyma.08G063800.1.p	PTHR11540:SF21 - MALATE DEHYDROGENASE, GLYOXYSOMAL (1 of 2)	0	284.636	65	13	209	1	6	356	37.4	8.29	898.8	13	1.273	0.813	0.45	1	1	1	144	113.1	91.9	50.9	24.38	50.72	49.51	84.75	2.65116e+08	3.20991e+08	4.27248e+08	3.066e+08	2.52075e+08	9.41139e+07	1.94512e+08	2.04879e+08	4.39257e+08	1.13482e+08	3.91009e+08	8.91364e+07	High	High	High	High	High	High	High
FALSE	High	Master Protein	Glyma.17G125700.1.p	K11294 - nucleolin (NCL, NSR1) (1 of 11)	0	282.191	48	12	698	9	9	302	33.1	4.7	2372.13	12	0.939	0.869	2.633	1	1	1	69	73.5	63.9	193.6	67.16	93.94	69.16	21.35	6.69413e+08	8.55686e+08	2.19669e+09	7.69425e+08	9.11117e+08	3.82208e+09	6.49689e+08	7.91712e+08	2.14902e+09	2.39892e+09	1.69451e+09	2.60298e+09	High	High	High	High	High	High	High
FALSE	High	Master Protein	Glyma.15G107900.2.p	K02115 - F-type H+-transporting ATPase subunit gamma (ATPF1G, atpG) (1 of 3)	0	281.754	57	22	376	8	8	375	41.3	7.03	1206.04	22	1.083	1.242	0.48	1	0.846079	1	113.9	105.1	130.6	50.4	12.67	52.69	30.2	42.12	5.5751e+08	4.82671e+08	4.3394e+08	4.45683e+08	4.54644e+08	1.35248e+08	5.5367e+08	4.56108e+08	8.10893e+08	2.13748e+08	3.59207e+08	1.60271e+08	High	High	High	High	High	Peak Found	High
FALSE	High	Master Protein	Glyma.08G286800.1.p	PTHR11695//PTHR11695:SF552 - ALCOHOL DEHYDROGENASE RELATED // SUBFAMILY NOT NAMED (1 of 2)	0	281.245	61	24	388	8	8	397	42.2	8.68	1252.14	24	1.14	1.159	1.303	1	1	0.799386	99.1	86.9	100.7	113.3	5.33	33.76	17.42	27.82	2.22572e+08	2.27958e+08	2.46198e+08	1.41314e+08	1.99926e+08	2.80693e+08	1.91659e+08	2.31634e+08	2.72481e+08	3.76522e+08	2.23568e+08	2.60478e+08	High	High	High	High	High	High	High
FALSE	High	Master Protein	Glyma.14G177200.1.p	PTHR31356:SF6 - THYLAKOID LUMENAL 29 KDA PROTEIN, CHLOROPLASTIC (1 of 2)	0	280.084	60	17	251	0	7	347	37.9	7.18	933.54	17	1.334	0.918	1.601	1	1	0.430189	109.9	82.4	75.7	132	5.75	46.75	40.66	11.17	2.87321e+08	2.93516e+08	3.19814e+08	2.6678e+08	2.20037e+08	9.23903e+07	1.16041e+08	2.02054e+08	2.77294e+08	3.52346e+08	3.52082e+08	4.25077e+08	High	High	High	High	High	High	High
FALSE	High	Master Protein	Glyma.06G101500.2.p	PTHR18860//PTHR18860:SF26 - 14-3-3 PROTEIN // SUBFAMILY NOT NAMED (1 of 5)	0	279.94	67	21	343	2	7	259	29.1	4.75	1013.65	21	1.346	1.877	0.512	1	1	1	113.7	84.5	158.6	43.2	63.8	17.48	39.24	115.96	1.92633e+08	2.28684e+08	5.77085e+08	1.69877e+08	2.06606e+08	1.46158e+08	3.18846e+08	2.28164e+08	4.96481e+08	6.2659e+07	5.27852e+08	8.69303e+07	High	High	High	High	High	High	High
FALSE	High	Master Protein	Glyma.10G235100.1.p	PTHR11588//PTHR11588:SF114 - TUBULIN // SUBFAMILY NOT NAMED (1 of 2)	0	278.825	52	19	223	0	1	448	50.4	4.83	636.31	19	0.817	0.975	0.92	1	1	1	88.1	107.7	105	99.2	10.45	10.84	9.1	34.39	5.85102e+06	4.7482e+06	5.24925e+06	6.42193e+06	5.39165e+06	6.64045e+06	6.26069e+06	7.14876e+06	6.03203e+06	5.91105e+06	5.5039e+06	9.93088e+06	High	High	High	High	High	Peak Found	High
FALSE	High	Master Protein	Glyma.15G061300.1.p	PTHR10286:SF3 - INORGANIC PYROPHOSPHATASE (1 of 2)	0	277.61	55	19	328	6	6	288	32.3	6.42	1028.39	19	1.518	1.554	5.502	1	1	0.905223	63.4	41.8	64.9	229.9	43.4	124.32	80.32	22.13	1.02143e+08	9.14109e+07	1.93265e+08	6.72774e+07	5.92568e+07	5.45707e+08	6.70534e+07	104547215	3.03917e+08	3.70132e+08	2.6636e+08	4.1873e+08	High	High	High	High	High	High	High
FALSE	High	Master Protein	Glyma.05G166800.1.p	PTHR17130:SF24 - GAN (1 of 2)	0	276.848	68	25	517	4	4	342	38.1	5.47	1426.41	25	0.76	1.594	2.709	1	1	0.847488	50.2	66	105.1	178.7	92.88	56.25	69.95	16.77	9.52687e+07	8.50374e+07	4.02601e+08	8.79845e+07	1.25329e+08	2.5541e+08	1.66231e+08	1.99717e+08	5.5298e+08	2.69104e+08	3.39484e+08	3.77853e+08	High	High	High	High	High	High	High
FALSE	High	Master Protein	Glyma.02G103900.1.p	PTHR24012:SF349 - POLYADENYLATE-BINDING PROTEIN 2-RELATED (1 of 5)	0	276.427	43	22	247	5	5	648	70.7	8.05	712.41	22	0.1	0.177	0.324	0.0872643	0.249302	0.814316	24.9	249.9	44.3	81	46.11	21.99	9.29	104.01	2.16029e+07	2.47458e+07	8.75827e+06	1.60231e+08	2.51508e+08	2.17038e+08	3.45947e+07	3.84393e+07	4.1692e+07	7.03034e+07	3.18772e+07	2.75346e+08	High	High	High	High	High	High	High
FALSE	High	Master Protein	Glyma.10G193200.1.p	PTHR11353//PTHR11353:SF80 - CHAPERONIN // SUBFAMILY NOT NAMED (1 of 4)	0	274.672	55	31	269	1	1	577	61.4	5.9	744.48	31	0.988	0.673	1.272	1	1	1	100.5	101.7	68.4	129.4	29.7	55.38	74.54	27.43	1.13102e+07	1.53294e+07	2.06424e+07	1.24486e+07	1.55085e+07	3.34232e+07	6.10764e+06	10430226	2.63355e+07	1.97252e+07	1.56894e+07	2.6944e+07	High	Peak Found	Peak Found	Peak Found	High	Peak Found	High
FALSE	High	Master Protein	Glyma.12G046200.1.p	PTHR14194:SF71 - PRESTALK A DIFFERENTIATION PROTEIN A (1 of 4)	0	274.258	59	20	205	12	12	528	55.7	7.37	823.59	20	1.364	1.12	1.499	1	1	1	109.5	80.3	89.9	120.4	22.41	11.75	33.51	33.74	4.70665e+08	4.91985e+08	6.95006e+08	3.60745e+08	3.81322e+08	3.02462e+08	2.32539e+08	4.03903e+08	4.73411e+08	5.68231e+08	5.4085e+08	2.84158e+08	High	High	High	High	High	High	High
FALSE	High	Master Protein	Glyma.11G077600.1.p	1.6.99.1 - NADPH dehydrogenase / NADPH diaphorase (1 of 3)	0	272.715	62	22	304	6	6	362	40.5	8.53	955.14	22	1.21	0.647	1.173	1	1	1	120.2	99.3	64.2	116.4	39.35	41.7	101.82	71.42	1.32496e+08	1.55211e+08	2.68736e+08	1.74272e+08	1.28234e+08	7.073e+07	5.78011e+07	8.29129e+07	3.69496e+08	1.50357e+08	3.81573e+08	9.95241e+07	High	High	High	High	High	High	High
FALSE	High	Master Protein	Glyma.13G204800.1.p	K02115 - F-type H+-transporting ATPase subunit gamma (ATPF1G, atpG) (1 of 3)	0	272.527	52	22	365	8	8	375	41.3	7.61	1173.8	22	1.194	1.444	1.328	1	1	0.610677	96.2	80.5	116.3	107	22.76	8.7	20.08	42.58	2.51901e+08	1.89092e+08	3.01508e+08	2.0028e+08	2.10974e+08	2.36816e+08	3.22985e+08	2.1718e+08	3.04721e+08	2.59571e+08	2.80196e+08	5.33042e+08	High	High	High	High	High	Peak Found	High
FALSE	High	Master Protein	Glyma.18G114900.1.p	PTHR31407:SF6 - OXYGEN-EVOLVING ENHANCER PROTEIN 2-1, CHLOROPLASTIC-RELATED (1 of 4)	0	271.704	54	13	1024	5	5	265	28.4	7.87	3742.09	13	1.041	1.199	1.426	1	1	1	89.2	85.7	102.8	122.3	79.99	20.36	81.3	34.91	1.00998e+09	1.09343e+09	5.67148e+07	8.45177e+08	9.70033e+08	1.2514e+09	1.33764e+09	1.16351e+09	5.85573e+07	1.44624e+09	7.04616e+08	1.38372e+09	High	High	High	High	High	High	High
FALSE	High	Master Protein	Glyma.01G199700.1.p	PTHR11715:SF1 - GLYCINE CLEAVAGE SYSTEM H PROTEIN 3, MITOCHONDRIAL (1 of 2)	0	270.248	67	12	913	0	1	199	21.9	6.2	3383.05	12	0.858	0.135	6.748	1	0.249555	1	39.3	45.8	6.2	308.8	24.54	139.52	92.92	52.52	2.26676e+07	3.76104e+07	3.17637e+07	3.70329e+07	2.38954e+07	4.08172e+08	212954	9.00484e+06	4.99304e+06	3.68141e+08	2.49893e+08	1.12578e+08	High	High	Not Found	High	High	High	High
FALSE	High	Master Protein	Glyma.08G283700.1.p	K08244 - alpha-glucan, water dikinase (E2.7.9.4) (1 of 2)	0	269.002	34	36	174	0	13	1459	163.7	6.84	507.37	36	0.986	0.658	0.811	1	1	1	114.2	115.8	76.1	93.9	12.37	27.86	62.53	32.22	4.05432e+07	3.85555e+07	3.1819e+07	5.35452e+07	3.9091e+07	3.08857e+07	1.91413e+07	2.57098e+07	5.97606e+07	2.55477e+07	4.73469e+07	3.17168e+07	High	High	High	High	High	Peak Found	High
FALSE	High	Master Protein	Glyma.18G057900.1.p	PTHR10366:SF369 - CINNAMOYL-COA REDUCTASE-LIKE PROTEIN (1 of 4)	0	268.46	61	18	247	0	8	321	35.1	5.83	772.39	18	1.103	1.715	0.679	1	0.816046	1	98.1	88.9	152.6	60.4	43.88	36.87	67.29	94.23	8.68304e+07	8.26407e+07	1.70892e+08	8.54715e+07	7.87099e+07	3.91926e+07	1.08835e+08	1.35026e+08	3.52504e+08	3.59883e+07	2.03165e+08	5.3422e+07	High	High	High	High	High	High	High
FALSE	High	Master Protein	Glyma.20G197100.1.p	PTHR11353//PTHR11353:SF80 - CHAPERONIN // SUBFAMILY NOT NAMED (1 of 4)	0	268.129	55	31	256	2	2	575	61.2	5.9	719.02	31	100	100	100				190.1		100.6	109.3	14.16		58.2	26.81	1.75272e+07	1.33628e+07	1.69646e+07				4.3611e+06	8.97924e+06	1.54951e+07	9.7576e+06	1.10437e+07	6.3488e+06	High	High	High	High	High	Not Found	High
FALSE	High	Master Protein	Glyma.10G026600.1.p	PTHR10366:SF278 - CHLOROPLAST STEM-LOOP BINDING PROTEIN OF 41 KDA A, CHLOROPLASTIC (1 of 2)	0	268.045	52	19	252	8	8	404	43.7	7.06	827.59	19	0.969	0.411	0.378	1	1	0.873015	140.5	145	59.6	54.9	41.54	56.91	54.25	43.23	2.69041e+08	2.87211e+08	1.17341e+08	2.77576e+08	2.85219e+08	7.27114e+07	1.14138e+08	225435756	8.03045e+07	1.0504e+08	1.14871e+08	4.45103e+07	High	High	High	High	High	High	High
FALSE	High	Master Protein	Glyma.19G007700.1.p	PTHR11002:SF7 - CARBONIC ANHYDRASE 2, CHLOROPLASTIC-RELATED (1 of 2)	0	265.535	60	18	512	0	1	341	36.7	7.43	1691.87	18	0.915	0.872	0.423	1	1	1	114	124.6	108.7	52.7	24.58	46.84	1.95	78.41	1.78954e+08	1.74438e+08	2.64246e+08	2.02983e+08	1.95545e+08	7.21498e+07	1.68015e+08	170584256	1.74627e+08	7.09374e+07	2.66919e+08	8.26965e+07	High	High	High	High	High	High	High
FALSE	High	Master Protein	Glyma.02G091900.1.p	PTHR11937//PTHR11937:SF255 - ACTIN // SUBFAMILY NOT NAMED (1 of 9)	0	264.306	59	18	246	0	6	377	41.8	5.4	751.88	18	0.953	0.74	1.177	1	1	0.96798	98.5	103.3	76.5	121.7	5.67	49.51	27.19	11.27	6.0914e+07	5.44267e+07	5.85588e+07	6.81991e+07	6.14603e+07	2.18983e+07	3.0704e+07	4.5498e+07	5.40315e+07	5.95268e+07	7.33463e+07	7.23554e+07	High	High	High	High	High	Peak Found	High
FALSE	High	Master Protein	Glyma.09G154700.1.p	K08916 - light-harvesting complex II chlorophyll a/b binding protein 5 (LHCB5) (1 of 4)	0	263.72	50	15	496	0	2	291	31	6	1403.14	15	0.807	0.371	0.085	1	1	0.749031	142.6	176.8	65.6	15	19.72	78.12	74.61	93.18	3.08507e+08	2.28496e+08	3.40434e+08	4.51782e+08	3.82515e+08	3.13452e+07	3.06698e+07	2.30973e+08	1.41885e+08	1.00097e+08	1.37749e+07	3.23902e+07	High	High	Not Found	High	High	High	High
FALSE	High	Master Protein	Glyma.07G262100.2.p	K00605 - aminomethyltransferase (gcvT, AMT) (1 of 4)	0	263.308	48	19	377	5	5	407	44.3	8.46	1195.72	19	1.016	0.776	1.891	1	1	0.2685	86.8	85.4	66.3	161.5	20.35	17.63	19.5	33.77	1.51477e+08	1.96228e+08	1.32787e+08	1.56256e+08	1.49162e+08	1.10785e+08	8.76406e+07	1.30307e+08	1.15719e+08	3.49098e+08	2.82057e+08	1.70461e+08	High	High	High	High	High	High	High
FALSE	High	Master Protein	Glyma.17G012000.1.p	K00605 - aminomethyltransferase (gcvT, AMT) (1 of 4)	0	263.259	48	19	409	5	5	407	44.3	8.15	1305.3	19	1.088	1.035	1.048	1	1	1	104.3	95.9	99.3	100.5	18.71	27.99	16.72	49.06	2.82499e+08	3.06695e+08	3.99288e+08	2.67516e+08	2.81906e+08	4.32987e+08	2.3638e+08	3.31849e+08	2.91842e+08	6.39554e+08	2.95499e+08	2.89778e+08	High	High	High	High	High	High	High
FALSE	High	Master Protein	Glyma.06G067400.1.p	K02109 - F-type H+-transporting ATPase subunit b (ATPF0B, atpF) (1 of 3)	0	260.714	45	15	347	6	6	215	23.4	5.83	1451.58	15	0.855	1.632	1.195	1	1	1	73.1	85.4	139.4	102.1	51.73	8.52	110.47	67.27	1.07436e+08	1.1873e+08	2.57099e+08	1.38821e+08	1.40281e+08	1.19967e+08	2.26595e+08	1.01121e+08	1.01039e+09	1.46894e+08	4.53519e+08	1.65871e+08	High	High	High	High	High	High	High
FALSE	High	Master Protein	Glyma.13G253600.1.p	PTHR10286:SF3 - INORGANIC PYROPHOSPHATASE (1 of 2)	0	260.058	52	17	308	4	4	288	32.3	6.81	966.65	17	0.602	0.447	0.308	1	1	0.813445	102.2	169.7	75.8	52.3	56.59	52.28	62.17	13.36	5.31024e+08	3.64098e+08	1.41335e+08	6.59154e+08	6.04446e+08	1.94326e+08	5.22221e+08	2.69924e+08	1.41811e+08	2.13074e+08	1.63034e+08	1.86303e+08	High	High	High	High	High	High	High
FALSE	High	Master Protein	Glyma.05G007100.1.p	PTHR11002:SF7 - CARBONIC ANHYDRASE 2, CHLOROPLASTIC-RELATED (1 of 2)	0	259.935	59	18	496	0	2	339	36.7	7.97	1636.08	18	0.665	0.687	1.623	1	1	1	66.9	100.6	69.1	163.3	65.25	84.96	62.29	49.41	5.95428e+07	7.67684e+07	1.36652e+07	1.34736e+08	8.95762e+07	6.10729e+06	6.15433e+07	4.52152e+07	1.41564e+08	7.35515e+07	2.17216e+08	1.45366e+08	High	High	High	High	High	High	High
FALSE	High	Master Protein	Glyma.03G005900.1.p	PTHR21237:SF27 - GRPE PROTEIN HOMOLOG (1 of 2)	0	259.687	59	21	346	3	8	335	37.2	4.67	1118.93	21	1.575	2.144	2.584	1	1	1	86.3	54.8	117.4	141.5	63.83	78.24	76.25	28.31	3.19602e+08	1.81522e+08	6.62264e+08	1.56758e+08	2.02882e+08	6.20939e+08	4.35009e+08	2.28304e+08	1.07619e+09	4.28491e+08	5.24326e+08	7.40461e+08	High	High	High	High	High	High	High
FALSE	High	Master Protein	Glyma.14G201500.1.p	PF16940 - Chloroplast envelope transporter (Tic110) (1 of 4)	0	259.501	36	31	208	7	7	996	109.8	6.19	544.49	31	0.767	0.572	0.976	0.901857	0.171139	1	92.6	120.7	69	117.7	12.62	4.46	13.34	25.93	6.80649e+07	7.22177e+07	5.6276e+07	8.5894e+07	8.87231e+07	9.37627e+07	4.85094e+07	6.18708e+07	5.07108e+07	8.94967e+07	5.37166e+07	8.65518e+07	High	High	High	High	High	High	High
FALSE	High	Master Protein	Glyma.11G121100.4.p	PTHR14194:SF71 - PRESTALK A DIFFERENTIATION PROTEIN A (1 of 4)	0	259.274	65	21	176	0	13	557	59.2	8.16	678.76	21	0.923	1.06	1.273	1	1	0.996114	86.7	94	99.6	119.6	39.66	8.24	17.09	11.46	9.38671e+07	8.92627e+07	1.73005e+08	1.01684e+08	9.95575e+07	1.15586e+08	1.07816e+08	9.9198e+07	1.36588e+08	1.22479e+08	1.29473e+08	1.52019e+08	High	High	High	High	High	High	High
FALSE	High	Master Protein	Glyma.20G177700.1.p	K02138 - F-type H+-transporting ATPase subunit d (ATPeF0D, ATP5H, ATP7) (1 of 2)	0	258.446	83	25	327	10	10	168	19.9	5.29	768.91	25	2.631	2.098	3.556	1	1	0.764543	113.3	43.1	90.4	153.2	49.32	89.98	58.67	18.91	4.44446e+08	4.16028e+08	9.43186e+08	1.57393e+08	1.689e+08	6.92144e+08	3.49747e+08	3.5443e+08	8.93132e+08	5.08203e+08	6.00642e+08	7.39721e+08	High	High	High	High	High	High	High
FALSE	High	Master Protein	Glyma.17G075300.1.p	1.2.1.9 - Glyceraldehyde-3-phosphate dehydrogenase (NADP(+)) / Triosephosphate dehydrogenase (1 of 3)	0	258.394	42	17	220	3	3	497	53.1	7.15	662.36	17	1.148	1.424	0.852	1	1	1	103.8	90.4	128.8	77	15.43	47.13	42.89	29.25	5.50709e+07	4.76253e+07	4.03568e+07	4.14777e+07	4.32437e+07	1.52115e+07	5.9065e+07	6.82131e+07	2.64144e+07	3.53185e+07	5.30092e+07	3.10604e+07	High	High	High	High	High	High	High
FALSE	High	Master Protein	Glyma.02G202500.1.p	1.2.1.9 - Glyceraldehyde-3-phosphate dehydrogenase (NADP(+)) / Triosephosphate dehydrogenase (1 of 3)	0	257.917	42	17	218	3	3	497	53.2	7.15	644.12	17	1.108	1.37	0.692	1	0.469096	0.96798	106.3	95.9	131.4	66.4	6.76	20.67	11.78	31.88	5.67919e+07	5.48071e+07	4.97445e+07	4.94657e+07	5.17337e+07	3.45206e+07	7.82884e+07	6.77724e+07	6.21828e+07	3.42382e+07	4.85734e+07	2.57515e+07	High	High	High	High	High	High	High
FALSE	High	Master Protein	Glyma.18G048200.1.p	PTHR22904:SF373 - PROTEIN TIC 40, CHLOROPLASTIC (1 of 2)	0	257.513	54	21	199	9	9	432	47.3	6.44	588.96	21	1.239	1.454	1.337	1	1	1	98.5	79.5	115.6	106.3	76.81	14.58	50.74	22.58	3.44911e+07	4.77975e+07	1.38279e+08	3.48314e+07	3.85833e+07	4.62445e+07	3.80337e+07	5.61066e+07	1.02516e+08	4.05086e+07	5.15996e+07	6.39954e+07	High	High	High	High	High	High	High
FALSE	High	Master Protein	Glyma.04G023900.1.p	PTHR11588//PTHR11588:SF118 - TUBULIN // SUBFAMILY NOT NAMED (1 of 4)	0	257.275	51	18	193	1	1	449	50.6	4.87	571.18	18																											Not Found	Not Found	High	Not Found	Not Found	High	Not Found
FALSE	High	Master Protein	Glyma.15G190500.1.p	PTHR11964:SF16 - S-ADENOSYLMETHIONINE SYNTHASE 4 (1 of 5)	0	257.128	57	17	158	5	6	395	43	5.82	542.82	17	0.913	0.622	1.24	1	1	1	96.7	106	65.9	131.4	47.32	32.91	55.62	36.44	9.6493e+07	8.42209e+07	3.29572e+07	9.22759e+07	1.25384e+08	6.3711e+07	5.73645e+07	131214923	5.13288e+07	1.14433e+08	1.30764e+08	5.99736e+07	High	High	High	High	High	High	High
FALSE	High	Master Protein	Glyma.10G057100.1.p	K13525 - transitional endoplasmic reticulum ATPase (VCP, CDC48) (1 of 11)	0	257.119	38	28	240	1	1	813	90	5.29	674.31	28	100						400				10.41				1.10959e+06	1.34189e+06	1.33156e+06										High	High	Not Found	High	Not Found	Not Found	Not Found
FALSE	High	Master Protein	Glyma.06G024100.1.p	PTHR11588//PTHR11588:SF118 - TUBULIN // SUBFAMILY NOT NAMED (1 of 4)	0	256.803	51	18	196	1	1	448	50.4	4.87	573.47	18																											Not Found	High	High	High	High	Not Found	High
FALSE	High	Master Protein	Glyma.06G170900.1.p	PTHR11595//PTHR11595:SF27 - ELONGATION FACTOR 1-BETA // SUBFAMILY NOT NAMED (1 of 1)	0	256.781	67	15	226	0	1	230	25	4.56	845.03	15	1.385	1.858	3.162	1	1	0.599266	74.8	54	100.4	170.8	63.03	22.63	71.53	52.88	4.7814e+06	5.54333e+06	1.39836e+07	5.45046e+06	4.00139e+06	3.57601e+06	7.43583e+06	3496876	1.60936e+07	1.26536e+07	2.01996e+07	6.38549e+06	High	High	High	High	High	High	Not Found
FALSE	High	Master Protein	Glyma.15G158900.2.p	PTHR23076//PTHR23076:SF60 - METALLOPROTEASE M41 FTSH // SUBFAMILY NOT NAMED (1 of 4)	0	256.288	40	21	250	2	2	690	74.1	6.19	737.62	21																											Not Found	High	High	High	High	Not Found	High
FALSE	High	Master Protein	Glyma.13G254900.1.p	K04043 - molecular chaperone DnaK (dnaK) (1 of 4)	0	255.844	49	26	214	2	2	674	72.4	5.87	688.53	26	1.882	2.268	3.664	1	1	0.370394	85.4	45.4	102.9	166.3	33.6	69.83	43.88	6.91	2.30888e+07	2.46689e+07	4.10558e+07	1.17157e+07	1.31077e+07	3.75132e+07	2.97251e+07	18785178	4.63364e+07	4.80609e+07	4.80217e+07	4.25153e+07	High	High	High	High	High	Peak Found	High
FALSE	High	Master Protein	Glyma.14G018700.1.p	PTHR30560:SF3 - TRIGGER FACTOR-LIKE PROTEIN TIG (1 of 4)	0	255.577	55	32	291	2	10	545	61.2	5.21	854.09	32	1.394	1.056	0.992	0.931944	0.897284	1	125.5	90.1	95.1	89.3	9.08	25.37	40.89	24.62	1.09781e+08	1.15373e+08	1.30596e+08	8.86224e+07	8.27637e+07	5.31936e+07	8.73653e+07	8.65407e+07	1.67569e+08	8.21061e+07	1.21375e+08	8.01008e+07	High	High	High	High	High	High	High
FALSE	High	Master Protein	Glyma.08G304200.1.p	PTHR31407:SF6 - OXYGEN-EVOLVING ENHANCER PROTEIN 2-1, CHLOROPLASTIC-RELATED (1 of 4)	0	255.566	54	13	989	5	5	262	28.2	7.44	3553.81	13	0.97	1.21	1.537	1	1	1	82.3	84.8	102.6	130.3	74.21	41.42	9.53	58.66	8.22605e+08	9.83435e+08	9.88111e+07	8.47682e+08	7.97266e+08	1.59644e+09	1.08895e+09	9.007e+08	1.02564e+09	1.40942e+09	3.30009e+08	1.30275e+09	High	High	High	High	High	High	High
FALSE	High	Master Protein	Glyma.12G049400.1.p	K03969 - phage shock protein A (pspA) (1 of 3)	0	255.401	57	20	293	0	1	323	35.5	9.33	1018.1	20	4.437	3.936	2.993	0.209059	0.651718	0.309816	143.5	32.3	127.3	96.8	13.58	23.48	64.49	11.6	1.33854e+08	1.04619e+08	1.09133e+08	1.73571e+07	2.45975e+07	2.81109e+07	1.88098e+07	9.68277e+07	1.03676e+08	6.92183e+07	8.62809e+07	7.3615e+07	High	High	High	High	High	High	Peak Found
FALSE	High	Master Protein	Glyma.09G047200.1.p	PF05558 - DREPP plasma membrane polypeptide (DREPP) (1 of 2)	0	254.645	68	18	301	9	9	207	23.1	4.93	1075.99	18	0.941	1.758	0.778	1	1	1	84.1	89.3	157.1	69.5	57.47	28.65	26.64	50.4	3.37736e+08	3.74621e+08	8.85278e+08	3.98097e+08	6.22842e+08	3.83589e+08	7.00017e+08	425397397	7.16779e+08	2.64396e+08	6.37571e+08	3.09892e+08	High	High	High	High	High	High	High
FALSE	High	Master Protein	Glyma.05G030700.2.p	PTHR24093:SF264 - ATPASE 4, PLASMA MEMBRANE-TYPE (1 of 6)	0	252.578	31	24	173	2	2	955	105	6.73	516.91	24	1.36	0.693	0.01	1	1		178.2	131	90.8		19.36	53.5	20.22		7.4962e+06	1.06709e+07	8.06612e+06	9.00346e+06	5.93098e+06	2.71093e+06	4.40929e+06	4112337	2.94676e+06				High	Peak Found	Not Found	High	Peak Found	Peak Found	Peak Found
FALSE	High	Master Protein	Glyma.10G048600.1.p	K02930 - large subunit ribosomal protein L4e (RP-L4e, RPL4) (1 of 4)	0	252.516	43	15	197	0	5	405	44.7	10.45	712.31	15	0.882	0.403	0.239	1	1	0.89025	139.9	158.5	63.8	37.8	51.35	56.12	54.36	60.29	2.76745e+08	2.86721e+08	8.86021e+07	3.33749e+08	3.13607e+08	8.65378e+07	8.13263e+07	238233120	1.26344e+08	1.71966e+08	5.84589e+07	7.4844e+07	High	High	Peak Found	High	High	High	High
FALSE	High	Master Protein	Glyma.11G226900.2.p	K01100 - sedoheptulose-bisphosphatase (E3.1.3.37) (1 of 2)	0	252.259	48	20	481	5	5	387	41.8	6.2	1261.58	20	1.302	1.842	0.341	1	0.889328	1	116.1	89.2	164.3	30.5	27.4	76.69	18.44	109.76	5.6919e+08	5.85567e+08	9.02473e+08	4.49906e+08	5.61607e+08	4.71046e+07	8.28706e+08	716551717	1.02892e+09	1.53636e+08	8.27153e+08	1.14363e+08	High	High	High	High	High	High	High
FALSE	High	Master Protein	Glyma.15G059900.1.p	K04043 - molecular chaperone DnaK (dnaK) (1 of 4)	0	251.952	50	29	202	6	6	674	72.4	6	613.34	29	1.51	1.985	1.46	1	0.367744	0.928628	101.4	67.2	133.3	98.1	24.49	34.37	9.41	12.07	1.79432e+07	1.48808e+07	2.39944e+07	1.13864e+07	1.18822e+07	2.02628e+07	2.09713e+07	2.53291e+07	2.35818e+07	1.67693e+07	2.08572e+07	1.73467e+07	High	High	High	High	High	Peak Found	High
FALSE	High	Master Protein	Glyma.04G066000.1.p	K02109 - F-type H+-transporting ATPase subunit b (ATPF0B, atpF) (1 of 3)	0	251.707	45	15	330	6	6	215	23.5	5.83	1288.21	15	5.248	3.22	2.994	0.498176	0.641812	0.660223	168.5	32.1	103.4	96.1	34.36	23.23	113.96	59.72	2.9094e+08	2.30691e+08	4.45407e+08	5.54358e+07	5.98454e+07	3.75117e+07	1.78496e+08	5.61615e+07	7.69408e+08	9.83705e+07	3.27737e+08	1.65947e+08	High	High	High	High	High	High	High
FALSE	High	Master Protein	Glyma.11G124800.1.p	K03969 - phage shock protein A (pspA) (1 of 3)	0	251.394	57	20	297	1	1	322	35.4	9.33	1075.92	20	0.706	1.243	1.252	1	1	1	67.2	95.2	118.3	119.3	50.45	28.39	98.92	46.55	5.60515e+07	5.69281e+07	1.2613e+08	8.74403e+07	4.89563e+07	8.063e+07	1.00188e+08	2.20721e+07	2.81689e+08	1.00988e+08	1.8797e+08	7.9997e+07	High	High	High	High	High	High	High
FALSE	High	Master Protein	Glyma.08G025700.1.p	K09490 - heat shock 70kDa protein 5 (HSPA5, BIP) (1 of 4)	0	251.334	44	29	255	3	3	667	73.4	5.19	748.52	29	2.25	0.972	4.234	0.0685167	1	0.00554849	106.4	47.3	46	200.3	16.58	28.78	24.66	26.31	1.83826e+07	1.41285e+07	1.37929e+07	6.46403e+06	3.65215e+06	6.28071e+06	6.09571e+06	9137735	6.10334e+06	2.65943e+07	2.16341e+07	3.61978e+07	High	High	High	Not Found	High	High	Peak Found
FALSE	High	Master Protein	Glyma.04G195100.1.p	K03232 - elongation factor 1-beta (EEF1B) (1 of 5)	0	251.154	64	14	213	1	1	230	25	4.56	758.95	14																											Not Found	Not Found	High	High	Not Found	Not Found	Not Found
FALSE	High	Master Protein	Glyma.14G010900.1.p	PTHR11627:SF19 - FRUCTOSE-BISPHOSPHATE ALDOLASE-RELATED (1 of 2)	0	250.338	60	15	194	4	4	357	38.4	6.61	824.28	15	1.201	1.101	0.306	1	1	1	133.2	110.8	122.1	33.9	10.41	77.15	31.47	65.48	1.81003e+08	2.108e+08	2.22295e+08	1.75479e+08	1.91047e+08	1.42094e+07	1.05722e+08	1.93256e+08	1.988e+08	4.4947e+07	1.38755e+08	5.37049e+07	High	High	High	High	High	High	High
FALSE	High	Master Protein	Glyma.14G222500.1.p	PTHR10438:SF247 - THIOREDOXIN-LIKE PROTEIN CDSP32, CHLOROPLASTIC (1 of 1)	0	250.309	54	14	278	14	14	292	33.2	6.8	919.43	14	1.105	1.205	1.054	1	1	1	101.3	91.7	110.4	96.6	11.96	12.45	22.22	39.88	7.44748e+08	8.67458e+08	6.88027e+08	6.74182e+08	6.80713e+08	5.41245e+08	5.70831e+08	8.12168e+08	8.95829e+08	1.07032e+09	7.10291e+08	4.75029e+08	High	High	High	High	High	High	High
FALSE	High	Master Protein	Glyma.07G040100.2.p	PTHR10795//PTHR10795:SF331 - PROPROTEIN CONVERTASE SUBTILISIN/KEXIN // SUBFAMILY NOT NAMED (1 of 2)	0	250.195	34	20	221	7	7	775	81.7	6.58	761.47	20	1.373	0.894	1.308	1	1	1	120.1	87.4	78.2	114.3	23.58	28.97	36.49	46.22	9.70192e+07	1.01875e+08	6.39125e+07	7.02633e+07	7.06452e+07	1.12911e+08	6.31566e+07	8.1974e+07	3.76753e+07	9.23944e+07	4.62572e+07	1.28297e+08	High	High	High	High	High	High	High
FALSE	High	Master Protein	Glyma.02G172800.1.p	PTHR11937//PTHR11937:SF255 - ACTIN // SUBFAMILY NOT NAMED (1 of 9)	0	249.938	54	16	211	1	1	377	41.6	5.49	600.91	16	0.01	0.01	0.01					400				25.05						1.53697e+06	2.33721e+06	2.55763e+06							Not Found	Not Found	Not Found	High	Not Found	Peak Found	Not Found
FALSE	High	Master Protein	Glyma.16G205200.1.p	K08916 - light-harvesting complex II chlorophyll a/b binding protein 5 (LHCB5) (1 of 4)	0	249.932	49	14	462	2	2	289	30.7	6	1305.96	14	0.817	0.222	0.324	1	1	1	138.3	169.3	37.6	54.8	67.56	67.35	90.33	76.92	1.89404e+08	1.80269e+08	2.93764e+07	2.50587e+08	2.20635e+08	3.89487e+07	2.22969e+07	1.47211e+08	4.89662e+07	1.19451e+08	1.43428e+07	7.14424e+07	High	High	Peak Found	High	High	High	High
FALSE	High	Master Protein	Glyma.19G120100.1.p	PTHR21237:SF27 - GRPE PROTEIN HOMOLOG (1 of 2)	0	248.704	59	21	335	8	8	338	37.6	4.64	1017.69	21	1.207	1.745	3.583	1	1	0.878733	64.1	53.1	92.7	190.2	111.51	83.69	91.12	40.5	1.41252e+08	1.71867e+08	1.00429e+09	1.32393e+08	1.42429e+08	5.22604e+08	1.92741e+08	2.48586e+08	9.52209e+08	5.10301e+08	4.97503e+08	9.65077e+08	High	High	High	High	High	High	High
FALSE	High	Master Protein	Glyma.14G219700.1.p	PTHR11528:SF45 - ENDOPLASMIN HOMOLOG (1 of 2)	0	247.57	41	34	200	0	4	847	97.3	5.02	504.26	34	1.746	2.443	4.172	1	0.567477	0.271015	74.6	42.7	104.4	178.3	70.24	5.8	54.43	34.86	1.05186e+07	1.27194e+07	3.52699e+07	7.24784e+06	8.02078e+06	7.28384e+06	1.77953e+07	1.12724e+07	3.33028e+07	1.51479e+07	3.05197e+07	3.0389e+07	High	High	High	High	High	Peak Found	High
FALSE	High	Master Protein	Glyma.11G164700.1.p	PTHR10366:SF369 - CINNAMOYL-COA REDUCTASE-LIKE PROTEIN (1 of 4)	0	247.453	55	16	224	0	6	321	34.9	5.99	694.43	16	1.447	1.509	1.069	0.750673	0.292516	0.899671	115.2	79.6	120.1	85.1	16.31	39.77	35.58	29.28	1.15477e+08	1.07115e+08	1.45154e+08	8.29138e+07	7.97856e+07	3.58382e+07	1.17775e+08	1.20409e+08	2.11427e+08	8.53126e+07	1.29499e+08	7.64328e+07	High	High	High	High	High	Peak Found	High
FALSE	High	Master Protein	Glyma.08G302600.1.p	K00830 - alanine-glyoxylate transaminase / serine-glyoxylate transaminase / serine-pyruvate transaminase (AGXT) (1 of 2)	0	246.488	51	20	184	6	6	401	44.2	8.13	582.27	20	0.601	0.19	0.068	1	0.0129922	0.00184974	129.3	215	40.9	14.7	12.11	14	48.11	18.34	1.01719e+08	8.04261e+07	9.76193e+07	1.72168e+08	1.30618e+08	1.62296e+08	1.38538e+07	4.1109e+07	3.09028e+07	9.5595e+06	1.11039e+07	1.37169e+07	High	High	High	High	High	Peak Found	High
FALSE	High	Master Protein	Glyma.07G206800.1.p	PTHR10314:SF110 - CYSTEINE SYNTHASE (1 of 2)	0	246.442	61	15	193	0	3	389	41.3	7.93	754.47	15	1.043	0.67	0.239	1	0.537	0.00416174	141.3	135.5	90.9	32.3	16.68	4.42	22.51	29.3	2.68748e+07	3.22158e+07	3.76266e+07	2.8872e+07	3.08949e+07	3.14177e+07	1.52601e+07	2.07145e+07	2.42232e+07	4.76325e+06	8.79306e+06	7.37086e+06	High	High	Not Found	High	High	Peak Found	High
FALSE	High	Master Protein	Glyma.08G239900.1.p	PTHR23324:SF48 - PATELLIN-3-RELATED (1 of 8)	0	246.392	59	29	179	5	21	576	65.2	4.83	540.91	29	2.581	3.036	0.912	0.542258	0.409232	1	137.1	53.1	161.3	48.5	11.73	8.1	55.99	30	2.37987e+08	2.77611e+08	3.01189e+08	1.07548e+08	1.23021e+08	1.06945e+08	3.26564e+08	1.22657e+08	4.59292e+08	9.30201e+07	1.5541e+08	9.80925e+07	High	High	High	High	High	High	High
FALSE	High	Master Protein	Glyma.07G112000.2.p	K08901 - photosystem II oxygen-evolving enhancer protein 3 (psbQ) (1 of 4)	0	245.733	57	20	1740	3	10	234	24.9	9.8	5025.42	20	1.101	0.939	2.288	1	1	1	82.7	75.1	70.5	171.8	40.44	89.8	28.22	38.52	4.99e+09	6.7287e+09	1.09281e+10	4.47644e+09	6.11203e+09	2.22741e+10	5.06735e+09	5.73805e+09	8.49321e+09	1.56904e+10	6.84952e+09	1.39836e+10	High	High	High	High	High	High	High
FALSE	High	Master Protein	Glyma.17G096100.1.p	PTHR24093:SF264 - ATPASE 4, PLASMA MEMBRANE-TYPE (1 of 6)	0	245.602	30	24	175	2	2	955	105	6.73	517.49	24	1.784	2.389	0.01	1	0.526256		137.9	77.3	184.7		27.84	58.06	20.32		3.6981e+06	2.09467e+06	3.40218e+06	1.90733e+06	4.36816e+06	1.58709e+06	3.97722e+06	4.55658e+06	5.88198e+06				High	Peak Found	Not Found	High	High	Peak Found	High
FALSE	High	Master Protein	Glyma.18G030400.1.p	K01100 - sedoheptulose-bisphosphatase (E3.1.3.37) (1 of 2)	0	245.442	45	19	476	4	4	387	41.7	6.43	1227.54	19	1.266	2.407	0.284	1	0.813744	1	102.2	80.7	194.2	22.9	42.82	71.72	15.58	128.5	4.12304e+08	3.52534e+08	7.54453e+08	3.25598e+08	3.40998e+08	4.07317e+07	7.87316e+08	5.90964e+08	7.83588e+08	7.76386e+07	8.17949e+08	9.24659e+07	High	High	High	High	High	High	High
FALSE	High	Master Protein	Glyma.17G258700.1.p	PTHR11528:SF45 - ENDOPLASMIN HOMOLOG (1 of 2)	0	244.962	43	34	192	0	4	814	93.2	4.98	490.99	34	1.445	0.798	1.598	1	1	0.686648	119.4	82.6	65.9	132.1	37.37	67.35	72.28	21.07	1.46836e+07	1.41718e+07	2.63265e+07	1.01591e+07	1.25738e+07	1.98523e+06	8.10512e+06	8.05145e+06	2.54355e+07	1.62378e+07	2.24191e+07	1.5492e+07	High	High	High	High	High	Peak Found	High
FALSE	High	Master Protein	Glyma.08G025900.1.p	K09490 - heat shock 70kDa protein 5 (HSPA5, BIP) (1 of 4)	0	244.743	44	31	252	2	3	708	78	5.24	709.43	31	0.836	0.848	0.5	1	1	0.300769	105	125.7	106.5	62.8	17.6	11.62	13.35	61.59	4.27237e+06	6.03723e+06	4.91596e+06	5.81489e+06	5.88042e+06	7.1081e+06	4.05515e+06	4.98381e+06	5.2752e+06	2.93971e+06	4.54372e+06	1.0458e+06	High	High	Not Found	Peak Found	Peak Found	High	Peak Found
FALSE	High	Master Protein	Glyma.01G109300.1.p	PTHR11588//PTHR11588:SF122 - TUBULIN // SUBFAMILY NOT NAMED (1 of 3)	0	243.742	46	17	195	0	1	449	50.6	4.87	540.57	17	1.939	2.369	4.514	1	1	0.928371	79	40.7	96.5	183.8	108.87	54.04	85.97	84.93	6.73589e+06	4.53164e+06	3.40648e+07	3.4734e+06	2.31906e+06	6.64641e+06	3.8234e+06	8228679	2.30008e+07	3.44086e+06	3.26011e+07	1.56791e+07	High	High	Peak Found	High	High	High	Peak Found
FALSE	High	Master Protein	Glyma.03G246300.1.p	K01807 - ribose 5-phosphate isomerase A (rpiA) (1 of 5)	0	243.686	49	12	276	5	5	281	29.8	5.73	1064.55	12	0.98	0.893	1.196	1	1	1	96.3	98.3	87.8	117.6	60.64	56.98	107.89	86.76	3.64868e+08	4.18162e+08	1.02164e+09	4.77477e+08	4.26737e+08	1.18513e+08	1.54277e+08	3.80949e+08	1.5542e+09	5.10364e+08	1.01122e+09	8.36839e+07	High	High	High	High	High	High	High
FALSE	High	Master Protein	Glyma.16G219500.1.p	PTHR11732:SF239 - ALDO/KETO REDUCTASE-RELATED (1 of 10)	0	242.999	73	20	150	13	20	322	36.1	6.8	463.63	20	1.187	0.859	1.307	1	1	1	109	91.9	79	120.1	17.97	30.15	65.87	30.62	4.00015e+08	3.69335e+08	5.1526e+08	3.02277e+08	3.37041e+08	5.19016e+08	2.21726e+08	2.89633e+08	7.20409e+08	2.8248e+08	5.37296e+08	4.40634e+08	High	High	High	High	High	Peak Found	High
FALSE	High	Master Protein	Glyma.14G184500.1.p	PTHR11680:SF12 - SERINE HYDROXYMETHYLTRANSFERASE 2, MITOCHONDRIAL (1 of 2)	0	242.654	36	15	222	0	5	507	56.1	8.27	647.19	15	0.921	0.554	0.156	1	0.686534	0.0338679	140	152	84.3	23.7	7.66	13.91	18.22	69.51	9.28997e+06	8.76573e+06	1.01919e+07	8.687e+06	1.14937e+07	1.00859e+07	4.52658e+06	5589943	6.5502e+06	1.46481e+06	4.56761e+06	1.5706e+06	High	High	High	High	High	Peak Found	High
FALSE	High	Master Protein	Glyma.11G030500.1.p	K09553 - stress-induced-phosphoprotein 1 (STIP1) (1 of 4)	0	242.054	59	28	208	9	9	585	65.5	6.67	569.96	28	0.902	1.024	1.329	1	1	0.96798	84.8	94	96.3	124.9	30.85	19.94	33.89	13.73	8.46454e+07	4.80642e+07	5.54392e+07	6.14641e+07	5.09153e+07	7.5836e+07	7.02672e+07	3.44269e+07	6.29672e+07	7.5869e+07	8.16838e+07	9.8432e+07	High	High	High	High	High	High	High
FALSE	High	Master Protein	Glyma.03G114600.1.p	K08901 - photosystem II oxygen-evolving enhancer protein 3 (psbQ) (1 of 4)	0	242.023	58	19	1569	9	9	232	24.8	9.85	4389.77	19	1.257	1.002	2.626	1	1	1	85.5	68	68.1	178.5	40.05	87.17	16.38	47.52	2.91558e+09	4.4773e+09	6.64834e+09	2.90011e+09	3.56057e+09	1.30166e+10	2.83314e+09	3.56661e+09	3.94367e+09	1.04388e+10	3.55919e+09	9.35158e+09	High	High	High	High	High	High	High
FALSE	High	Master Protein	Glyma.15G154700.1.p	PF05558 - DREPP plasma membrane polypeptide (DREPP) (1 of 2)	0	241.572	71	19	284	10	10	218	24.3	5.05	930.62	19	2.387	1.816	2.163	0.288717	0.543833	0.456394	129.6	54.3	98.6	117.5	38.35	33.38	27.1	32.52	3.44763e+08	3.11112e+08	6.05755e+08	1.20944e+08	1.44425e+08	2.2495e+08	2.62288e+08	2.53305e+08	4.00976e+08	2.13191e+08	4.17652e+08	3.12442e+08	High	High	High	High	High	High	High
FALSE	High	Master Protein	Glyma.13G136400.1.p	K02930 - large subunit ribosomal protein L4e (RP-L4e, RPL4) (1 of 4)	0	241.144	43	15	209	5	5	405	44.6	10.48	723.01	15	1.03	0.976	0.377	1	1	0.187277	121.8	118.3	115.4	44.6	6.71	22.09	27.96	31.44	1.08331e+08	1.217e+08	1.08837e+08	1.05705e+08	1.07939e+08	7.06197e+07	6.64912e+07	1.03118e+08	1.18898e+08	6.59188e+07	3.99033e+07	3.92658e+07	High	High	Peak Found	High	High	High	High
FALSE	High	Master Protein	Glyma.10G006500.1.p	K00025 - malate dehydrogenase (MDH1) (1 of 3)	0	241.046	50	12	207	0	2	328	35.2	6.3	790.44	12	1.613	1.39	0.951	0.259075	0.66972	1	130.2	80.7	112.3	76.8	13.05	11.31	27.42	3.23	6.7789e+07	8.63988e+07	7.1638e+07	4.44223e+07	5.17517e+07	4.17008e+07	4.62691e+07	61767743	8.07212e+07	4.22992e+07	4.22346e+07	3.99489e+07	High	High	High	High	High	Not Found	Peak Found
FALSE	High	Master Protein	Glyma.08G065100.1.p	K04043 - molecular chaperone DnaK (dnaK) (1 of 4)	0	241.044	44	24	218	0	1	677	72.5	6.04	655.85	24																											High	High	Not Found	High	Not Found	Not Found	Not Found
FALSE	High	Master Protein	Glyma.02G275600.1.p	PTHR23050:SF153 - CALMODULIN-1-RELATED (1 of 6)	0	240.747	87	14	322	0	14	149	16.9	4.27	1108.78	14	1.514	1.323	3.569	1	1	0.856747	81.8	54	71.5	192.8	95.41	89.57	77.87	18.98	7.92648e+08	9.78864e+08	4.13551e+09	4.13627e+08	6.46636e+08	2.20821e+09	6.19423e+08	8.55579e+08	2.52355e+09	1.83815e+09	2.30788e+09	2.70392e+09	High	High	High	High	High	High	High
FALSE	High	Master Protein	Glyma.08G124900.1.p	PTHR17130:SF24 - GAN (1 of 2)	0	239.998	68	25	486	4	4	340	37.8	5.69	1273.35	25	1.156	1.878	1.815	1	0.988455	0.914882	79.1	68.4	128.5	124.1	64.71	32.6	34.45	7.34	7.01533e+07	5.42235e+07	1.72083e+08	4.97134e+07	6.06803e+07	9.21028e+07	7.61194e+07	1.1398e+08	1.55462e+08	9.75491e+07	1.10111e+08	1.11909e+08	High	High	High	High	High	High	High
FALSE	High	Master Protein	Glyma.08G081100.1.p	PTHR11588:SF97 - TUBULIN BETA-4 CHAIN-RELATED (1 of 6)	0	238.962	50	19	214	0	2	443	49.9	4.89	603.47	19	1.007	1.294	0.601	1	0.988455	0.240914	103.2	102.5	132.7	61.6	10.09	14.74	7.18	26.88	3.96267e+07	3.75544e+07	3.24626e+07	3.439e+07	4.54847e+07	3.72763e+07	4.46952e+07	5.16104e+07	4.82524e+07	2.2111e+07	3.4522e+07	2.24093e+07	High	High	High	High	High	High	High
FALSE	High	Master Protein	Glyma.03G110300.1.p	K13199 - plasminogen activator inhibitor 1 RNA-binding protein (SERBP1) (1 of 5)	0	238.911	45	16	221	5	7	368	39.1	6.02	721.19	16	0.458	0.909	1.174	1	1	1	51.8	113	102.7	132.6	67.41	44.72	18.05	52.45	6.50228e+07	6.83537e+07	1.94124e+08	1.23589e+08	1.49152e+08	2.76413e+08	1.007e+08	1.43755e+08	1.35587e+08	1.75074e+08	1.00595e+08	2.99676e+08	High	High	High	High	High	High	High
FALSE	High	Master Protein	Glyma.14G189400.1.p	4.1.2.13 - Fructose-bisphosphate aldolase / Fructose-1,6-bisphosphate triosephosphate-lyase (1 of 15)	0	238.36	66	21	183	9	9	358	38.3	7.53	623.51	21	1.047	0.889	0.503	1	1	0.0717803	121.8	116.3	103.4	58.5	11.45	1.53	6.71	33.77	1.50112e+08	1.2767e+08	1.21079e+08	1.24244e+08	1.2054e+08	1.21961e+08	1.08456e+08	1.18417e+08	1.03949e+08	4.65732e+07	9.04666e+07	6.13551e+07	High	High	High	High	High	Peak Found	High
FALSE	High	Master Protein	Glyma.02G147300.1.p	PTHR10366:SF278 - CHLOROPLAST STEM-LOOP BINDING PROTEIN OF 41 KDA A, CHLOROPLASTIC (1 of 2)	0	238.229	52	19	238	8	8	403	43.7	6.76	736.07	19	0.903	0.362	0.301	1	0.431477	0.0831819	140.8	155.9	56.5	46.9	22.16	19.48	53.32	35.07	1.14337e+08	1.3348e+08	8.47222e+07	1.49e+08	1.26573e+08	1.00249e+08	4.17421e+07	1.021e+08	4.58693e+07	5.30515e+07	3.80585e+07	2.57715e+07	High	High	High	High	High	Peak Found	High
FALSE	High	Master Protein	Glyma.07G215300.3.p	PTHR24012:SF349 - POLYADENYLATE-BINDING PROTEIN 2-RELATED (1 of 5)	0	237.002	42	19	233	0	4	651	70.9	7.75	673.63	19	1.102	0.743	2.018	1	0.906208	1	90.6	82.3	61.1	166	36.77	67.9	17.09	26.84	3.34657e+07	3.52615e+07	6.2089e+07	3.20093e+07	2.99447e+07	9.08526e+07	2.37879e+07	3.0147e+07	2.19002e+07	6.46058e+07	4.84225e+07	8.35589e+07	High	High	High	High	High	High	High
FALSE	High	Master Protein	Glyma.04G009400.1.p	PF00257 - Dehydrin (Dehydrin) (1 of 7)	0	236.722	56	13	173	13	13	214	24.2	5.77	770.09	13	1.09	1.241	3.035	1	1	0.198631	68.5	62.8	78	190.7	14.09	49.42	38.37	23.8	3.33762e+08	3.52612e+08	4.32763e+08	2.56191e+08	3.23545e+08	6.30114e+08	2.39952e+08	5.42605e+08	4.01425e+08	9.81801e+08	7.38654e+08	1.20227e+09	High	High	High	High	High	High	High
FALSE	High	Master Protein	Glyma.01G211200.3.p	PF00515//PF13181//PF13414 - Tetratricopeptide repeat (TPR_1) // Tetratricopeptide repeat (TPR_8) // TPR repeat (TPR_11) (1 of 1)	0	236.714	57	29	206	0	10	585	65.6	6.46	548.69	29	1.259	1.315	2.166	1	1	0.407145	87.7	69.7	91.6	150.9	22.88	46.23	12.86	12.85	4.53215e+07	3.53547e+07	5.62352e+07	3.56334e+07	3.60021e+07	7.49347e+07	4.02088e+07	4.73285e+07	5.20995e+07	7.13389e+07	7.79735e+07	9.15785e+07	High	High	High	High	High	High	High
FALSE	High	Master Protein	Glyma.07G034800.1.p	1.13.11.12//1.13.11.58 - Linoleate 13S-lipoxygenase / Lipoxidase // Linoleate 9S-lipoxygenase / Linoleate 9-lipoxygenase (1 of 3)	0	235.573	36	26	163	7	20	865	96.3	7.02	511	26	1.111	0.617	0.495	1	0.3283	0.0665457	137.9	124.1	76.5	61.4	20.91	6.29	20.78	16.54	2.02814e+08	1.41249e+08	2.13034e+08	1.82489e+08	1.99156e+08	1.76608e+08	1.12507e+08	1.04297e+08	1.52093e+08	9.03306e+07	1.17522e+08	8.82612e+07	High	High	High	High	High	Peak Found	High
FALSE	High	Master Protein	Glyma.02G005500.1.p	K00025 - malate dehydrogenase (MDH1) (1 of 3)	0	235.568	50	12	206	0	2	332	35.4	6.3	757.11	12	1.419	1.844	0.556	1	0.860105	1	117.8	83	153	46.2	21.94	66.09	12.56	96.66	1.76505e+08	1.74513e+08	2.51866e+08	1.43556e+08	1.24383e+08	2.38721e+07	2.29335e+08	219287290	2.76149e+08	6.91811e+07	2.06903e+08	2.20509e+07	High	High	High	High	High	Peak Found	High
FALSE	High	Master Protein	Glyma.04G002900.1.p	K01845 - glutamate-1-semialdehyde 2,1-aminomutase (hemL) (1 of 2)	0	234.899	42	14	196	4	4	470	50	6.47	711.59	14	1.008	1.014	0.684	1	1	1	108.8	107.9	109.5	73.8	9.03	32.85	27.37	40.47	1.16641e+08	1.22074e+08	1.38461e+08	1.21154e+08	1.32966e+08	6.70194e+07	7.57463e+07	1.229e+08	1.31896e+08	4.5743e+07	1.09785e+08	8.28503e+07	High	High	High	High	High	Peak Found	High
FALSE	High	Master Protein	Glyma.09G052600.1.p	PTHR23076//PTHR23076:SF60 - METALLOPROTEASE M41 FTSH // SUBFAMILY NOT NAMED (1 of 4)	0	234.609	38	19	226	0	2	695	74.6	6.19	685.22	19	1.048	0.674	0.76	1	0.904305	0.772727	120.4	114.9	77.5	87.3	16.9	20.91	26.96	44.12	4.10868e+06	5.06482e+06	5.78868e+06	5.60534e+06	4.8322e+06	3.65473e+06	3.43179e+06	3.25877e+06	2.00082e+06	1.5085e+06	3.98106e+06	3.67362e+06	High	High	High	High	High	Not Found	High
FALSE	High	Master Protein	Glyma.15G038100.1.p	PTHR21139:SF6 - TRIOSEPHOSPHATE ISOMERASE, CYTOSOLIC (1 of 2)	0	233.947	81	17	198	3	3	253	27.2	6.23	668.46	17	1.628	2.159	1.68	0.786144	0.260291	0.58167	100.7	61.9	133.5	103.9	16.21	58.31	20.75	24.96	8.09223e+07	5.84701e+07	6.86607e+07	4.21819e+07	4.79888e+07	1.12978e+07	1.13912e+08	7.53512e+07	9.10655e+07	4.62988e+07	7.08694e+07	7.66781e+07	High	High	High	High	High	High	High
FALSE	High	Master Protein	Glyma.07G212800.2.p	K00366 - ferredoxin-nitrite reductase (nirA) (1 of 2)	0	233.284	49	29	254	0	10	588	65.8	6.9	652.08	29	1.295	1.008	0.699	1	1	1	129.4	100	100.7	69.9	34.1	18.53	33.69	16	1.15736e+08	7.83744e+07	1.58453e+08	8.93859e+07	9.43197e+07	6.55307e+07	6.14343e+07	9.00794e+07	1.23041e+08	5.77811e+07	7.79895e+07	6.24919e+07	High	High	High	High	High	Peak Found	High
FALSE	High	Master Protein	Glyma.15G203100.1.p	PTHR23359:SF72 - ADENYLATE KINASE FAMILY PROTEIN (1 of 3)	0	232.694	48	26	178	1	12	603	67.4	8.56	440.42	26	0.879	0.926	0.368	1	1	0.0805065	110.8	126	116.7	46.4	8.67	12.36	20.21	41.31	7.60008e+07	7.6887e+07	8.85018e+07	7.95065e+07	1.01335e+08	8.74418e+07	1.00631e+08	6.72676e+07	8.09903e+07	6.15915e+07	3.22154e+07	3.1309e+07	High	High	High	High	High	Peak Found	High
FALSE	High	Master Protein	Glyma.12G073100.1.p	PTHR31356:SF10 - L-ASCORBATE PEROXIDASE 2, CYTOSOLIC (1 of 3)	0	232.679	62	13	192	9	9	250	27.1	5.99	677.82	13	0.832	0.827	0.584	1	1	1	102.6	123.3	101.9	72.1	17.21	26.36	21.44	58.87	4.18928e+08	5.43015e+08	3.98887e+08	5.03395e+08	5.2656e+08	3.11785e+08	3.08383e+08	4.78228e+08	4.16098e+08	6.92394e+08	2.94149e+08	2.51938e+08	High	High	High	High	High	High	High
FALSE	High	Master Protein	Glyma.09G245700.1.p	K02147 - V-type H+-transporting ATPase subunit B (ATPeV1B, ATP6B) (1 of 4)	0	231.69	47	19	197	0	19	489	54.1	5.06	637.74	19	1.141	0.962	1.234	1	1	1	105.2	92.2	88.7	113.8	53.65	14.52	100.78	48.55	5.45468e+08	6.35302e+08	1.3796e+09	5.79078e+08	5.56716e+08	4.37433e+08	3.96223e+08	5.35493e+08	2.40145e+09	6.86962e+08	1.1376e+09	4.19118e+08	High	High	High	High	High	High	High
FALSE	High	Master Protein	Glyma.10G059500.1.p	K01803 - triosephosphate isomerase (TIM) (TPI, tpiA) (1 of 5)	0	231.269	62	18	254	3	3	304	32.5	6.7	821.46	18	7.91	1.896	1.019	0.00631692	0.424384	1	267.6	33.8	64.1	34.5	24.49	45.23	6.33	5.8	4.35827e+07	2.63307e+07	3.60511e+07	7.9251e+06	3.32127e+06	4.55776e+06	8.64252e+06	9.38953e+06	8.30432e+06	4.64311e+06	4.24803e+06	4.74759e+06	High	High	High	High	High	Not Found	Not Found
FALSE	High	Master Protein	Glyma.02G294900.1.p	PTHR30560:SF3 - TRIGGER FACTOR-LIKE PROTEIN TIG (1 of 4)	0	231.185	52	33	259	1	11	542	61.1	5.19	710.08	33	2.32	1.844	0.976	0.0495267	0.0818554	1	151.1	65.2	120.1	63.6	19.64	9.65	19	32.59	1.57338e+08	1.2026e+08	1.08971e+08	5.18462e+07	5.18922e+07	4.36565e+07	9.38162e+07	9.55816e+07	1.29661e+08	4.42846e+07	7.987e+07	5.06164e+07	High	High	High	High	High	Peak Found	High
FALSE	High	Master Protein	Glyma.14G039100.1.p	K03232 - elongation factor 1-beta (EEF1B) (1 of 5)	0	230.98	77	14	230	1	1	223	24.2	4.68	772.15	14	1.294	1.916	1.685	1	0.751175	1	87.8	67.8	130	114.3	13.57	48.2	30.25	34.23	2.19654e+07	2.4088e+07	2.85757e+07	1.862e+07	1.26343e+07	3.26362e+07	2.59207e+07	35682845	4.79723e+07	3.1381e+07	3.53953e+07	1.71659e+07	High	High	High	High	High	High	High
FALSE	High	Master Protein	Glyma.08G015900.1.p	3.4.11.14 - Cytosol alanyl aminopeptidase / Soluble alanyl aminopeptidase (1 of 3)	0	230.72	37	29	139	12	12	913	102.7	6.04	349.71	29	0.851	0.919	1.101	1	1	1	87.9	103.3	95	113.8	39.45	13.38	22.77	10.26	2.69175e+07	3.11178e+07	5.43535e+07	3.65615e+07	3.26288e+07	4.2521e+07	2.99974e+07	3.36119e+07	4.58508e+07	4.0263e+07	4.07507e+07	3.37234e+07	High	High	Peak Found	High	High	Peak Found	High
FALSE	High	Master Protein	Glyma.10G213400.1.p	K02138 - F-type H+-transporting ATPase subunit d (ATPeF0D, ATP5H, ATP7) (1 of 2)	0	229.978	82	25	331	10	10	168	19.9	5.2	788.04	25	1.101	1.498	2.426	1	1	1	73.1	66.4	99.4	161.1	91.23	72.84	50.31	15.94	1.74771e+08	2.27497e+08	8.69374e+08	1.8041e+08	2.06573e+08	6.13749e+08	3.0944e+08	2.95756e+08	6.74003e+08	4.84156e+08	5.01135e+08	6.41605e+08	High	High	High	High	High	High	High
FALSE	High	Master Protein	Glyma.02G276600.1.p	K03232 - elongation factor 1-beta (EEF1B) (1 of 5)	0	229.9	77	14	223	2	2	223	24.3	4.68	751.55	14	1.415	1.422	1.294	1	1	1	110.3	78	110.9	100.9	36.62	39.51	47.26	10.95	2.35875e+07	2.07365e+07	3.97707e+07	1.13176e+07	1.66691e+07	2.52098e+07	1.20733e+07	23708816	3.40677e+07	2.15654e+07	2.25841e+07	1.82297e+07	High	High	High	High	High	High	High
FALSE	High	Master Protein	Glyma.02G303000.1.p	PTHR11627:SF19 - FRUCTOSE-BISPHOSPHATE ALDOLASE-RELATED (1 of 2)	0	229.504	56	13	169	2	2	357	38.4	7.2	715.35	13	0.836	1.104	0.718	1	1	0.680248	91.4	109.3	120.7	78.5	20.99	12.46	36.45	38.11	2.89043e+07	4.02093e+07	2.80242e+07	3.45718e+07	3.62936e+07	2.84445e+07	1.93734e+07	3.81761e+07	4.19311e+07	1.14128e+07	2.49236e+07	2.48113e+07	High	High	High	High	High	Peak Found	High
FALSE	High	Master Protein	Glyma.13G046200.1.p	K01602 - ribulose-bisphosphate carboxylase small chain (rbcS) (1 of 5)	0	229.203	77	18	2818	0	15	178	20	8.66	5198.15	18	1.112	0.762	0.223	1	1	1	143.6	129.1	98.4	28.8	54.41	81.62	54.22	98.81	3.03171e+10	3.28256e+10	9.01066e+09	3.79786e+10	2.72546e+10	2.21695e+09	2.07758e+10	2.53999e+10	6.94813e+09	6.08366e+09	1.72593e+10	1.39842e+09	High	High	High	High	High	High	High
FALSE	High	Master Protein	Glyma.10G151900.1.p	K03065 - 26S proteasome regulatory subunit T5 (PSMC3, RPT5) (1 of 4)	0	229.162	56	21	180	0	20	423	47.4	5.11	511.36	21	0.833	1.028	1.731	1	1	0.0287786	72.6	87.1	89.6	150.8	8.95	19.2	3.2	11.92	1.27283e+08	1.27846e+08	1.48401e+08	1.14318e+08	1.53387e+08	1.68357e+08	1.52354e+08	1.57737e+08	1.62433e+08	2.8802e+08	2.65512e+08	2.26719e+08	High	High	High	High	High	High	High
FALSE	High	Master Protein	Glyma.06G002900.1.p	K01845 - glutamate-1-semialdehyde 2,1-aminomutase (hemL) (1 of 2)	0	228.948	42	14	201	4	4	466	49.6	5.94	645.85	14	1.302	0.69	0.754	1	1	1	139	106.8	73.7	80.5	11.04	18.73	37.78	16.2	6.98129e+07	8.64916e+07	7.51272e+07	5.97428e+07	5.7705e+07	4.16161e+07	3.93119e+07	3.98326e+07	7.26883e+07	3.58855e+07	4.98258e+07	4.35304e+07	High	High	High	High	High	High	High
FALSE	High	Master Protein	Glyma.13G232500.1.p	K03405 - magnesium chelatase subunit I (chlI, bchI) (1 of 4)	0	228.673	43	15	243	0	8	421	45.8	5.69	802.28	15	1.496	0.999	2.795	1	1	0.5058	95.1	63.6	63.5	177.7	33.12	25.49	92.64	10.71	1.36608e+08	1.79304e+08	2.62114e+08	1.19045e+08	1.19868e+08	1.81306e+08	1.02496e+08	1.19733e+08	4.93769e+08	3.22494e+08	3.9276e+08	3.34987e+08	High	High	High	High	High	High	High
FALSE	High	Master Protein	Glyma.06G116200.1.p	PTHR32161:SF8 - PROTEIN TAG-10, ISOFORM A (1 of 1)	0	228.554	45	21	151	21	21	723	79.9	6.67	516.86	21	1.887	1.299	1.122	0.0310896	0.21806	1	142.2	75.4	97.9	84.5	6.02	6.32	25.43	5.7	1.99868e+08	2.24168e+08	2.06001e+08	1.1295e+08	1.09161e+08	9.97866e+07	1.29275e+08	2.04495e+08	1.41789e+08	1.14204e+08	1.27973e+08	1.22434e+08	High	High	High	High	High	High	High
FALSE	High	Master Protein	Glyma.08G363800.2.p	PTHR18860:SF27 - 14-3-3-LIKE PROTEIN GF14 LAMBDA (1 of 4)	0	228.106	63	19	279	0	10	257	29	4.75	724.26	19	1.209	1.062	0.707	1	1	1	121.5	100.6	106.8	71.1	28.01	43.09	25.93	52.79	1.37767e+08	1.40036e+08	2.19248e+08	1.15873e+08	1.18267e+08	4.71324e+07	1.09389e+08	1.2302e+08	1.76238e+08	8.1953e+07	1.82893e+08	7.61919e+07	High	High	High	High	High	Peak Found	High
FALSE	High	Master Protein	Glyma.13G146200.1.p	K01803 - triosephosphate isomerase (TIM) (TPI, tpiA) (1 of 5)	0	227.937	59	17	257	2	2	305	32.6	6.68	837.83	17	0.213	1.561	2.748	0.0182493	0.860105	0.0433657	15.4	72.4	113.1	199.1	7.29	42.32	20.62	7.85	1.29895e+06	1.34299e+06	1.4908e+06	9.25868e+06	3.79908e+06	6.3127e+06	6.94401e+06	9.85561e+06	1.04395e+07	1.73494e+07	1.62588e+07	1.89947e+07	High	High	Not Found	High	High	Not Found	Not Found
FALSE	High	Master Protein	Glyma.03G196900.1.p	PTHR11564//PTHR11564:SF19 - GTPASE CONTAINING FAMILY OF SIGNAL RECOGNITION PARTICLE PROTEINS // SUBFAMILY NOT NAMED (1 of 2)	0	227.745	45	22	196	22	22	565	61.7	9.51	521.3	22	1.209	1.142	0.867	1	0.806426	1	114.6	94.9	108.3	82.2	10.23	32.3	19.81	15.32	2.47435e+08	2.8284e+08	3.03698e+08	2.34026e+08	2.35347e+08	1.24042e+08	2.67143e+08	2.2683e+08	3.35158e+08	1.95828e+08	2.56995e+08	2.02816e+08	High	High	High	High	High	High	High
FALSE	High	Master Protein	Glyma.14G219300.1.p	PTHR11588//PTHR11588:SF118 - TUBULIN // SUBFAMILY NOT NAMED (1 of 4)	0	227.465	46	17	185	0	1	457	51.5	4.72	540.04	17	1.583	1.345	1.124	1	1	1	125.3	79.2	106.5	89	27.42	20.51	6.62	48.47	3.75012e+06	5.87014e+06	6.60755e+06	3.29913e+06	4.86378e+06	3.70851e+06	4.92508e+06	4987738	5.54477e+06	1.57144e+06	4.16715e+06	4.76182e+06	High	High	Peak Found	High	High	Peak Found	High
FALSE	High	Master Protein	Glyma.17G084300.1.p	PF00581 - Rhodanese-like domain (Rhodanese) (1 of 30)	0	227.341	58	19	216	1	6	397	41.8	9.39	802.23	19	0.922	0.785	0.306	1	1	0.0952029	122.4	132.7	104.2	40.7	9.78	33.85	6.7	32.65	2.03482e+08	2.15781e+08	1.77655e+08	2.20754e+08	2.22359e+08	1.12891e+08	1.63644e+08	1.86949e+08	1.73353e+08	5.79005e+07	1.05503e+08	6.76563e+07	High	High	High	High	High	High	High
FALSE	High	Master Protein	Glyma.13G169500.1.p	PTHR11071:SF236 - PEPTIDYL-PROLYL CIS-TRANS ISOMERASE CYP38, CHLOROPLASTIC (1 of 2)	0	227.336	55	18	414	4	4	445	48.7	5.2	1274.19	18	0.678	0.843	2.045	1	1	0.84384	59.4	87.6	73.9	179.1	4.36	60.38	63.09	26.22	3.05369e+07	3.22305e+07	2.9577e+07	4.50382e+07	2.26209e+07	8.24103e+07	3.79682e+07	1.45313e+07	6.31709e+07	1.13646e+08	6.6185e+07	9.21007e+07	High	High	High	High	High	High	Peak Found
FALSE	High	Master Protein	Glyma.02G209000.1.p	PTHR31356:SF6 - THYLAKOID LUMENAL 29 KDA PROTEIN, CHLOROPLASTIC (1 of 2)	0	226.178	60	17	223	0	7	347	37.7	6.61	776.81	17	0.866	0.747	1.573	1	0.540195	1	82.8	95.6	71.3	150.3	16.01	30.75	49.6	27.95	1.10218e+08	1.15429e+08	8.45124e+07	1.27266e+08	1.14125e+08	1.97849e+08	3.16136e+07	9.5031e+07	9.5301e+07	2.84458e+08	1.6664e+08	2.00254e+08	High	High	High	High	High	Peak Found	High
FALSE	High	Master Protein	Glyma.08G063500.1.p	K10206 - LL-diaminopimelate aminotransferase (E2.6.1.83) (1 of 3)	0	225.413	54	19	145	1	1	458	49.9	7.09	468.4	19	0.892	0.388	6.49	1	0.249555	0.377578	40.7	45.6	17.7	296	34.42	109.03	8.83	12.83	1.85809e+06	3.86936e+06	3.25607e+06	3.65068e+06	3.37266e+06	2.14053e+07	1.29126e+06	1.41702e+06	1.54134e+06	2.36932e+07	1.90555e+07	2.42936e+07	High	High	Not Found	High	High	Peak Found	Not Found
FALSE	High	Master Protein	Glyma.07G184300.1.p	K04043 - molecular chaperone DnaK (dnaK) (1 of 4)	0	225.365	44	25	208	1	1	677	72.4	6.04	618.17	25	1.183	1.083	0.01	1	1		144.8	122.5	132.7		13.87	21.22	4.03		9.2668e+06	7.24207e+06	9.35739e+06	9.8261e+06	7.83535e+06	6.43422e+06	8.48866e+06	8461225	9.08034e+06				High	High	Not Found	High	High	Not Found	Not Found
FALSE	High	Master Protein	Glyma.08G200100.1.p	PTHR31284:SF7 - ACID PHOSPHATASE-RELATED (1 of 8)	0	225.134	54	16	256	5	16	254	29.3	7.21	818.36	16	1.626	1.537	0.892	1	0.823859	1	128.7	79.1	121.6	70.6	7.9	62.02	16.75	59.29	2.05073e+09	2.23005e+09	1.90486e+09	1.26092e+09	1.52291e+09	3.08264e+08	1.74901e+09	2.41006e+09	1.93843e+09	1.12462e+09	1.92328e+09	5.18102e+08	High	High	High	High	High	High	High
FALSE	High	Master Protein	Glyma.16G008900.1.p	PTHR10795//PTHR10795:SF331 - PROPROTEIN CONVERTASE SUBTILISIN/KEXIN // SUBFAMILY NOT NAMED (1 of 2)	0	224.296	19	20	192	7	7	1427	152.8	6.54	639.36	20	1.052	0.891	0.713	1	0.733298	0.0878973	115.1	109.4	97.5	78	9.47	6.64	11.11	8.98	5.06095e+07	5.55658e+07	4.59632e+07	5.30213e+07	4.68152e+07	4.81019e+07	3.73857e+07	4.67436e+07	4.28636e+07	3.9667e+07	3.42965e+07	3.38802e+07	High	High	High	High	High	Peak Found	High
FALSE	High	Master Protein	Glyma.13G073200.1.p	K03232 - elongation factor 1-beta (EEF1B) (1 of 5)	0	224.295	66	12	205	1	8	224	24.2	4.65	776.49	12	1.3	1.318	1.692	1	1	1	97.9	75.3	99.3	127.5	34.74	5.18	45.65	42.34	2.50996e+08	2.88159e+08	4.69291e+08	2.10473e+08	2.33474e+08	2.21684e+08	2.42925e+08	2.92288e+08	5.50562e+08	3.75152e+08	4.11437e+08	1.63236e+08	High	High	High	High	High	High	High
FALSE	High	Master Protein	Glyma.12G177100.1.p	K13525 - transitional endoplasmic reticulum ATPase (VCP, CDC48) (1 of 11)	0	224.034	42	29	225	0	6	807	89.7	5.31	581.5	29	1.37	2.378	1.416	1	0.0952739	0.71966	88.9	64.9	154.3	91.9	28.17	3.62	23.82	11.13	1.32395e+07	1.07762e+07	7.37086e+06	7.86608e+06	8.35892e+06	7.84553e+06	1.23089e+07	1.97553e+07	1.87041e+07	9.88718e+06	1.11352e+07	1.23652e+07	High	High	High	High	High	High	High
FALSE	High	Master Protein	Glyma.20G098400.1.p	PTHR11073//PTHR11073:SF17 - CALRETICULIN AND CALNEXIN // SUBFAMILY NOT NAMED (1 of 2)	0	223.868	48	23	224	0	9	451	52	4.64	644.59	23	1.049	0.803	1.768	1	1	1	90.8	86.6	69.5	153.1	69.43	51.87	78.36	27.96	1.40332e+08	1.11767e+08	3.77023e+08	1.33823e+08	9.51219e+07	2.55664e+08	9.67752e+07	1.07466e+08	3.54938e+08	2.25056e+08	3.63674e+08	2.36555e+08	High	High	High	High	High	High	High
FALSE	High	Master Protein	Glyma.19G052400.2.p	K03231 - elongation factor 1-alpha (EEF1A) (1 of 8)	0	223.538	34	14	250	1	1	447	49.2	9.07	829.47	14	1.117	0.682	0.829	1	1	1	123.1	110.3	75.2	91.4	82.72	16.54	13.25	49.38	9.2127e+06	2.08461e+07	2.92119e+06	9.30594e+06	8.2491e+06	6.65403e+06	4.45573e+06	5624984	5.69688e+06	6.83939e+06	3.35104e+06	9.99339e+06	High	High	Peak Found	High	High	Peak Found	Peak Found
FALSE	High	Master Protein	Glyma.19G127700.1.p	PTHR11588:SF106 - TUBULIN BETA-6 CHAIN (1 of 2)	0	222.978	48	18	195	0	2	450	50.5	4.82	549.25	18	0.588	0.817	1.446	1	1	1	61.1	103.9	84.9	150.1	39.67	42.54	50.92	25.11	1.01885e+07	4.48786e+06	6.94695e+06	1.18075e+07	7.79597e+06	1.84877e+07	4.94858e+06	9.6502e+06	1.49844e+07	1.23016e+07	2.0647e+07	1.70697e+07	High	High	Peak Found	High	High	Peak Found	High
FALSE	High	Master Protein	Glyma.07G185700.1.p	K10206 - LL-diaminopimelate aminotransferase (E2.6.1.83) (1 of 3)	0	222.939	60	20	146	2	2	458	49.8	6.65	461.9	20	0.799	0.155	4.227	1	0.0205511	0.051324	51.7	64.7	10.1	273.6	31.65	15.23	59.6	16.15	2.00876e+06	1.31296e+06	1.11774e+06	1.64407e+06	2.11325e+06	1.63461e+06	215379	603417	255408	7.86579e+06	5.67065e+06	6.94965e+06	High	High	Not Found	Peak Found	High	Not Found	Peak Found
FALSE	High	Master Protein	Glyma.03G185800.1.p	K01803 - triosephosphate isomerase (TIM) (TPI, tpiA) (1 of 5)	0	222.853	59	17	280	3	3	309	33.1	6.79	919.29	17	2.406	1.899	2.3	0.695959	0.829635	0.509847	126.6	52.6	99.9	121	43.23	16.63	70.88	48.23	6.16731e+07	5.58306e+07	1.1708e+08	2.48656e+07	2.56279e+07	3.32588e+07	4.86753e+07	3.18628e+07	1.21768e+08	5.89546e+07	1.1311e+08	4.70164e+07	High	High	High	High	High	High	High
FALSE	High	Master Protein	Glyma.U021900.1.p	PTHR31356:SF10 - L-ASCORBATE PEROXIDASE 2, CYTOSOLIC (1 of 3)	0	221.168	61	12	191	5	8	250	27	5.81	668.74	12	0.817	1.297	1.094	1	1	1	77.7	95.1	123.3	104	23.18	12.29	32.95	41.27	2.72828e+08	3.79387e+08	2.48539e+08	3.31471e+08	4.0898e+08	3.34048e+08	2.3067e+08	4.51208e+08	4.33159e+08	5.10505e+08	3.65364e+08	2.11413e+08	High	High	High	High	High	High	High
FALSE	High	Master Protein	Glyma.06G217500.1.p	PF01429 - Methyl-CpG binding domain (MBD) (1 of 21)	0	220.938	60	20	154	10	10	305	33.8	4.83	490.68	20	1.476	1.503	1.495	1	1	0.822157	107.9	73.1	109.8	109.2	41.17	30.81	39.81	60.15	6.49566e+07	7.21101e+07	1.32251e+08	3.80319e+07	4.88565e+07	6.96615e+07	7.34277e+07	3.46656e+07	8.20165e+07	7.3044e+07	6.32938e+07	1.76474e+08	High	High	High	Peak Found	High	High	High
FALSE	High	Master Protein	Glyma.05G016000.1.p	PF00581 - Rhodanese-like domain (Rhodanese) (1 of 30)	0	220.611	54	18	193	1	5	396	41.7	9.26	692.86	18	1.009	0.811	0.536	1	1	0.158408	120.2	119.2	96.7	63.8	28.24	1.52	25.17	22.29	6.9151e+07	8.33598e+07	1.18738e+08	8.34087e+07	8.26524e+07	8.09682e+07	6.47223e+07	6.70389e+07	9.94159e+07	3.48729e+07	5.47557e+07	4.42666e+07	High	High	High	High	High	High	High
FALSE	High	Master Protein	Glyma.02G222400.1.p	4.1.2.13 - Fructose-bisphosphate aldolase / Fructose-1,6-bisphosphate triosephosphate-lyase (1 of 15)	0	219.654	56	19	172	8	8	358	38.2	7.55	548.87	19	1.218	1.118	0.37	1	1	0.415352	131.5	108	120.7	39.9	14.43	37.42	27.82	45.93	1.7345e+08	1.83442e+08	2.26241e+08	1.50657e+08	1.92929e+08	8.64076e+07	1.09378e+08	1.95041e+08	1.68423e+08	5.56734e+07	1.07392e+08	4.7973e+07	High	High	High	High	High	Peak Found	High
FALSE	High	Master Protein	Glyma.10G166900.1.p	PTHR35299:SF2 - RUBISCO ACCUMULATION FACTOR 1, CHLOROPLASTIC-RELATED (1 of 2)	0	218.745	55	18	151	12	18	439	48.4	5.29	559.47	18	1.522	1.114	0.462	0.881636	1	0.928628	148.6	97.6	108.7	45.1	12.3	32.65	41	34.44	4.38631e+08	4.00714e+08	5.09642e+08	2.94856e+08	2.88186e+08	1.52924e+08	1.66166e+08	4.07496e+08	3.20936e+08	1.33017e+08	2.22535e+08	1.22695e+08	High	High	High	High	High	High	High
FALSE	High	Master Protein	Glyma.12G026900.1.p	PTHR32010:SF6 - PHOTOSYSTEM II STABILITY/ASSEMBLY FACTOR HCF136, CHLOROPLASTIC (1 of 3)	0	216.638	61	20	217	6	6	393	43.3	7.4	641.69	20	1.015	0.903	0.064	1	1	0.000477175	136.2	134.1	121.1	8.6	3.9	8.7	6.95	45.79	9.72964e+07	9.14408e+07	9.83806e+07	9.84921e+07	9.58269e+07	8.34071e+07	7.89906e+07	8.65617e+07	9.06975e+07	6.14962e+06	1.22957e+07	5.69915e+06	High	High	Not Found	High	High	Not Found	High
FALSE	High	Master Protein	Glyma.18G193600.1.p	PTHR11556:SF16 - FRUCTOSE-1,6-BISPHOSPHATASE, CHLOROPLASTIC (1 of 2)	0	216.357	32	13	241	3	3	410	44.6	5.4	909.47	13	0.769	0.524	0.486	1	0.823806	0.963581	110.7	143.9	75.5	69.9	38.25	39.29	50.65	51.05	7.4591e+07	8.04264e+07	3.56979e+07	1.27938e+08	9.69775e+07	5.49137e+07	1.89657e+07	61669306	5.08589e+07	8.12456e+07	2.86069e+07	4.70845e+07	High	High	High	High	High	High	High
FALSE	High	Master Protein	Glyma.17G216000.2.p	K00811 - aspartate aminotransferase, chloroplastic (ASP5) (1 of 2)	0	216.32	62	24	227	6	6	463	50.6	8.18	667.93	24	1.018	0.702	1.143	1	1	1	105.4	103.5	72.7	118.4	3.17	3.07	57.82	33.1	8.31123e+07	8.83608e+07	8.46057e+07	8.31062e+07	7.90804e+07	8.37014e+07	5.76634e+07	5.83616e+07	1.45229e+08	5.12049e+07	1.01374e+08	9.50256e+07	High	High	High	High	High	High	High
FALSE	High	Master Protein	Glyma.19G009700.1.p	PTHR11071:SF236 - PEPTIDYL-PROLYL CIS-TRANS ISOMERASE CYP38, CHLOROPLASTIC (1 of 2)	0	215.051	48	18	423	4	4	445	48.7	5.2	1323.22	18	0.969	1.203	4.092	1	1	0.638156	53.4	55.1	66.3	225.3	11.97	85.8	45.62	30.51	3.86383e+07	4.7842e+07	3.97052e+07	4.09731e+07	3.86738e+07	1.57055e+08	4.93064e+07	4.38164e+07	9.62056e+07	1.67656e+08	9.67731e+07	1.81143e+08	High	High	High	High	High	High	High
FALSE	High	Master Protein	Glyma.02G185300.1.p	PTHR22912:SF48 - NADPH-DEPENDENT THIOREDOXIN REDUCTASE 3 (1 of 2)	0	213.035	45	17	119	0	7	522	57	7.06	440.27	17	1.011	0.539	0.177	1	0.00452048	2.99187e-05	148.3	146.7	79.1	25.9	11.83	4.64	5.85	9.37	5.18854e+07	4.66349e+07	4.08901e+07	4.61329e+07	4.90134e+07	4.47803e+07	2.48809e+07	2.33792e+07	2.62861e+07	7.19628e+06	8.15646e+06	8.67594e+06	High	High	Not Found	High	High	Peak Found	High
FALSE	High	Master Protein	Glyma.06G175400.1.p	K11294 - nucleolin (NCL, NSR1) (1 of 11)	0	212.49	48	9	255	5	5	290	32	4.83	935	9	0.719	0.518	3.165	1	0.947545	1	53.2	74	38.4	234.3	47.96	87.63	90.25	8.11	1.50682e+08	1.36961e+08	3.08444e+08	2.09505e+08	2.00246e+08	8.34129e+08	5.88166e+07	1.08615e+08	3.49697e+08	6.19352e+08	7.27445e+08	6.63174e+08	High	High	High	High	High	High	High
FALSE	High	Master Protein	Glyma.13G336200.1.p	PTHR21139:SF6 - TRIOSEPHOSPHATE ISOMERASE, CYTOSOLIC (1 of 2)	0	212.129	76	16	189	2	2	227	24.6	6.55	623	16	1.453	1.888	0.278	1	0.988455	1	125.8	86.6	163.5	24.1	13.08	73.17	18	126.03	1.01075e+08	8.66376e+07	1.12801e+08	6.95794e+07	7.95981e+07	8.53474e+06	1.50795e+08	1.04589e+08	1.31355e+08	1.9374e+07	1.28929e+08	9.48948e+06	High	High	High	High	High	High	High
FALSE	High	Master Protein	Glyma.18G116900.1.p	K00830 - alanine-glyoxylate transaminase / serine-glyoxylate transaminase / serine-pyruvate transaminase (AGXT) (1 of 2)	0	211.124	52	21	172	7	7	401	44.3	8.12	471.84	21	0.855	0.409	1.219	1	1	1	98.2	114.8	47	140	57.81	26.57	105.15	37.4	1.05089e+08	7.86127e+07	2.26994e+08	1.74821e+08	1.22882e+08	1.06225e+08	2.66167e+07	5.02487e+07	2.13538e+08	1.5322e+08	1.49833e+08	7.0853e+07	High	High	High	High	High	Peak Found	High
FALSE	High	Master Protein	Glyma.12G161300.1.p	K01595 - phosphoenolpyruvate carboxylase (ppc) (1 of 10)	0	210.453	30	28	152	0	15	967	110.6	5.96	428.14	28	1.007	1.099	1.635	1	1	0.942973	84.9	84.4	92.7	138	20.26	65.29	42.38	11.07	8.5786e+07	7.6186e+07	5.67818e+07	7.56856e+07	1.39714e+08	3.24882e+07	8.31566e+07	1.23595e+08	5.09493e+07	1.05838e+08	1.31903e+08	1.23759e+08	High	High	High	High	High	High	High
FALSE	High	Master Protein	Glyma.05G243200.1.p	PTHR33414:SF2 - PLASTID MOVEMENT IMPAIRED1 (1 of 4)	0	210.305	44	27	104	13	27	855	94.3	5.31	297.55	27	1.048	0.777	0.354	1	1	0.799386	131.9	125.8	97.8	44.5	46.35	45.35	52.67	18.93	4.87498e+08	3.62387e+08	8.73043e+08	4.81018e+08	4.65006e+08	1.78814e+08	4.9503e+08	3.61339e+08	1.46184e+08	2.07429e+08	1.64597e+08	1.43605e+08	High	High	High	High	High	High	High
FALSE	High	Master Protein	Glyma.06G189900.1.p	PTHR24093:SF264 - ATPASE 4, PLASMA MEMBRANE-TYPE (1 of 6)	0	208.962	24	20	130	0	6	956	105.2	6.84	394.79	20	0.945	0.11	0.404	1	0.0024881	0.0698649	153.7	162.7	17.8	65.7	28.03	10.76	30.23	21.41	1.09005e+07	8.26632e+06	6.17526e+06	9.16716e+06	7.42477e+06	8.7467e+06	1.5405e+06	959124	927087	2.89492e+06	4.4386e+06	3.53527e+06	High	High	Not Found	High	High	Not Found	High
FALSE	High	Master Protein	Glyma.01G115900.1.p	PTHR21649:SF6 - CHLOROPHYLL A-B BINDING PROTEIN CP29.1, CHLOROPLASTIC-RELATED (1 of 2)	0	208.768	59	13	231	1	1	290	31.3	6.14	668.14	13	0.61	0.597	0.216	1	1	1	100.8	165.1	98.5	35.6	87.7	67.59	71.14	40.16	5.22507e+08	3.119e+08	2.31466e+07	5.11186e+08	5.11626e+08	8.07425e+07	4.1629e+08	304996430	5.62119e+07	1.32895e+08	5.52307e+07	1.10214e+08	High	High	Peak Found	High	High	High	High
FALSE	High	Master Protein	Glyma.13G291300.1.p	K00053 - ketol-acid reductoisomerase (ilvC) (1 of 3)	0	208.591	33	16	143	2	2	586	63.4	7.49	512.57	16	1.307	0.01	0.01	1			226.6	173.4			73.72	30			1.73592e+06	6.89096e+06	1.17471e+07	5.27409e+06	5.10221e+06	8.4443e+06							High	High	Peak Found	High	High	Peak Found	High
FALSE	High	Master Protein	Glyma.11G099300.1.p	PF16320 - Ribosomal protein L7/L12 dimerisation domain (Ribosomal_L12_N) (1 of 2)	0	206.597	56	15	831	4	4	233	24.8	7.65	2568.9	15	1.072	0.908	6.76	1	1	1	44	41.1	37.3	277.6	138.62	130.97	148.57	2.69	2.09947e+08	2.96234e+08	3.2914e+09	2.76295e+08	2.66949e+08	2.79835e+09	5.8533e+07	2.5098e+08	2.91948e+09	1.92773e+09	1.86781e+09	1.82745e+09	High	High	High	High	High	High	High
FALSE	High	Master Protein	Glyma.03G060300.1.p	PTHR21649:SF6 - CHLOROPHYLL A-B BINDING PROTEIN CP29.1, CHLOROPLASTIC-RELATED (1 of 2)	0	205.894	57	13	238	1	1	290	31.4	6.32	702.1	13	0.607	0.614	0.387	1	1	1	93.2	153.4	94.1	59.3	70.74	58.06	72.49	54.23	4.04731e+08	2.41635e+08	6.79306e+07	3.97813e+08	4.24168e+08	1.0207e+08	3.77436e+08	244153008	5.31064e+07	1.75238e+08	4.79606e+07	1.53789e+08	High	High	High	High	High	High	High
FALSE	High	Master Protein	Glyma.02G132100.1.p	K00366 - ferredoxin-nitrite reductase (nirA) (1 of 2)	0	205.575	47	27	236	8	8	605	67.6	6.93	576.99	27	0.776	0.997	0.383	1	1	0.218234	98.4	126.7	126.3	48.6	39.16	21.49	9.48	45.45	4.31316e+07	4.17188e+07	7.95842e+07	5.55741e+07	5.91451e+07	3.8589e+07	5.53834e+07	5.04128e+07	6.09442e+07	1.34581e+07	3.41317e+07	2.12998e+07	High	High	High	High	High	Peak Found	High
FALSE	High	Master Protein	Glyma.02G309500.1.p	K08909 - light-harvesting complex I chlorophyll a/b binding protein 3 (LHCA3) (1 of 2)	0	205.228	49	10	382	0	10	276	29.8	8.66	1066.86	10	0.607	0.539	0.188	1	1	0.959366	104	171.4	92.3	32.3	41.1	65.18	20.63	102.89	4.29957e+09	2.96459e+09	1.81423e+09	4.91697e+09	4.88614e+09	8.81227e+08	2.6317e+09	3.31956e+09	2.20806e+09	9.19788e+08	3.52755e+09	4.19019e+08	High	High	High	High	High	High	High
FALSE	High	Master Protein	Glyma.04G002300.1.p	PTHR11229:SF5 - 50S RIBOSOMAL PROTEIN L3-1, CHLOROPLASTIC (1 of 2)	0	203.786	54	15	276	7	7	263	28.8	10.45	877.65	15	1.017	1.37	1.908	1	1	1	76.8	75.5	103.5	144.1	29.85	59.63	2.97	43.55	2.51883e+08	3.15691e+08	1.6944e+08	2.1245e+08	2.47591e+08	5.90328e+08	3.30633e+08	3.50753e+08	3.39256e+08	4.72326e+08	2.15906e+08	5.69204e+08	High	High	High	High	High	High	High
FALSE	High	Master Protein	Glyma.18G156500.1.p	K17732 - mitochondrial-processing peptidase subunit beta [EC:3.4.24.64] (PMPCB, MAS1) (1 of 3)	0	203.494	65	26	149	2	7	527	58.8	6.99	385.74	26	1.127	1.018	0.274	1	1	0.0303216	131.8	117	119.1	32	6.51	30.26	18.28	37.63	4.48102e+07	4.47152e+07	5.00026e+07	3.97647e+07	4.77368e+07	2.52952e+07	5.26534e+07	4.04975e+07	3.76459e+07	6.70772e+06	1.4846e+07	1.0893e+07	High	High	High	High	High	Peak Found	High
FALSE	High	Master Protein	Glyma.12G001800.1.p	PTHR23324:SF48 - PATELLIN-3-RELATED (1 of 8)	0	202.821	59	30	147	3	21	606	69.5	4.87	425.41	30	2.853	1.347	1.701	0.53223	0.893611	0.879604	165.4	58	78	98.6	8.85	8.09	92.93	13.39	2.02391e+08	2.1517e+08	2.40528e+08	7.11591e+07	8.33801e+07	7.54067e+07	1.01544e+08	7.94512e+07	4.03517e+08	1.283e+08	1.59962e+08	1.27387e+08	High	High	High	High	High	Peak Found	High
FALSE	High	Master Protein	Glyma.06G136500.1.p	PTHR33231:SF1 - 30S RIBOSOMAL PROTEIN-RELATED (1 of 2)	0	202.128	46	15	166	8	10	291	32.8	6.81	601.08	15	0.927	0.801	1.723	1	1	0.914363	83.3	89.9	72	154.8	15.68	46.54	56.01	9.09	1.75366e+08	2.32209e+08	2.34708e+08	1.92745e+08	2.5047e+08	4.5879e+08	2.00645e+08	1.92305e+08	4.78049e+08	4.31516e+08	4.04147e+08	4.82872e+08	High	High	High	High	High	High	High
FALSE	High	Master Protein	Glyma.20G055900.1.p	K00549 - 5-methyltetrahydropteroyltriglutamate--homocysteine methyltransferase (metE) (1 of 6)	0	201.219	22	15	155	2	2	799	88.6	6.86	500.6	15																											High	Not Found	Not Found	High	Not Found	Not Found	Not Found
FALSE	High	Master Protein	Glyma.07G142700.1.p	PTHR11556:SF16 - FRUCTOSE-1,6-BISPHOSPHATASE, CHLOROPLASTIC (1 of 2)	0	201.159	31	12	221	2	2	408	44.4	5.3	831.07	12	0.753	0.362	0.371	1	0.676501	0.6814	121.2	160.9	58.2	59.7	58.26	23.2	59.05	13.49	8.31099e+07	8.63014e+07	2.07871e+07	1.26213e+08	1.10352e+08	7.8397e+07	2.18608e+07	74735768	3.99441e+07	5.05338e+07	4.09507e+07	3.97722e+07	Peak Found	Peak Found	High	High	Peak Found	High	Peak Found
FALSE	High	Master Protein	Glyma.05G114900.1.p	K03231 - elongation factor 1-alpha (EEF1A) (1 of 8)	0	200.898	31	13	205	1	1	447	49.2	9.07	683.7	13	0.881	0.603	2.509	1	0.474326	1	70.6	80.1	48.3	201	13.15	95.02	50.97	41.2	1.15738e+08	1.50896e+08	1.35137e+08	1.53422e+08	1.32486e+08	6.63456e+08	3.07324e+07	99458390	9.25372e+07	4.93728e+08	3.85001e+08	2.00525e+08	High	High	High	High	High	High	High
FALSE	High	Master Protein	Glyma.11G202700.1.p	PTHR22904:SF373 - PROTEIN TIC 40, CHLOROPLASTIC (1 of 2)	0	200.481	43	18	158	0	6	429	47.1	6.81	402.77	18	1.28	1.057	1.1	1	1	1	115.4	90.1	95.3	99.2	14.16	27.48	40.43	41.3	1.41478e+08	1.86166e+08	1.78451e+08	1.36195e+08	2.15692e+08	1.39392e+08	8.5052e+07	1.47339e+08	2.02073e+08	1.53325e+08	1.70836e+08	6.94571e+07	High	High	High	High	High	High	High
FALSE	High	Master Protein	Glyma.07G014500.1.p	PTHR31284:SF7 - ACID PHOSPHATASE-RELATED (1 of 8)	0	200.183	70	21	527	6	21	254	29	8.63	1386.58	21	1.684	1.621	0.636	1	1	1	136.3	81	131.2	51.5	10.2	58.95	36.36	73.73	7.65598e+09	8.88503e+09	7.34997e+09	4.54617e+09	5.52914e+09	1.27078e+09	4.2663e+09	9.29431e+09	7.36796e+09	2.89074e+09	6.5825e+09	1.39342e+09	High	High	High	High	High	High	High
FALSE	High	Master Protein	Glyma.13G058600.1.p	PTHR11638:SF121 - CHAPERONE PROTEIN CLPB3, CHLOROPLASTIC (1 of 4)	0	199.454	39	34	159	4	16	978	110.1	6.65	372.16	34	1.011	1.069	0.922	1	1	1	101	100	106.8	92.1	8.85	11.36	21.99	36.69	8.67061e+07	8.81113e+07	7.47132e+07	9.11168e+07	8.57937e+07	7.27431e+07	9.16816e+07	1.05975e+08	6.75181e+07	7.90682e+07	4.0022e+07	8.72269e+07	High	High	High	High	High	Peak Found	High
FALSE	High	Master Protein	Glyma.07G233800.1.p	PTHR11964:SF16 - S-ADENOSYLMETHIONINE SYNTHASE 4 (1 of 5)	0	198.82	45	14	131	0	3	392	43	6.02	465.36	14	1.075	1.575	1.12	1	1	1	90.1	83.9	132.1	93.9	36.7	12.13	52.06	38.92	2.55367e+07	2.80531e+07	4.82632e+07	3.07589e+07	2.44118e+07	2.61056e+07	1.43604e+07	4.11051e+07	4.88867e+07	2.36512e+07	4.87657e+07	2.92346e+07	High	High	High	High	High	High	High
FALSE	High	Master Protein	Glyma.08G174200.1.p	PTHR23115:SF138 - TRANSLATION INITIATION FACTOR IF-2, CHLOROPLASTIC (1 of 2)	0	198.156	34	29	147	7	7	1010	107.8	8.51	352.39	29	0.827	0.399	0.901	1	1	1	105.8	127.9	51	115.2	37.25	10.88	71.22	41.82	2.28176e+07	2.48208e+07	4.32979e+07	3.00195e+07	2.50087e+07	3.07048e+07	1.14453e+07	1.1971e+07	3.623e+07	2.7039e+07	4.75008e+07	2.2092e+07	High	High	High	High	High	High	Peak Found
FALSE	High	Master Protein	Glyma.06G194900.1.p	K08910 - light-harvesting complex I chlorophyll a/b binding protein 4 (LHCA4) (1 of 2)	0	197.794	58	10	101	3	3	252	27.9	7.44	435.09	10	0.629	0.641	0.123	1	1	0.532786	105.1	167.2	107.1	20.6	53.07	70.67	60.52	47.54	4.75475e+08	2.83344e+08	1.54428e+08	4.50608e+08	6.09642e+08	8.40436e+07	2.88675e+08	3.37304e+08	7.25637e+07	5.54853e+07	1.106e+08	4.85239e+07	High	High	High	High	High	High	High
FALSE	High	Master Protein	Glyma.02G094900.1.p	PTHR31407:SF4 - PSBP-LIKE PROTEIN 1, CHLOROPLASTIC (1 of 2)	0	197.761	52	17	256	2	2	248	28	9.28	819.32	17	0.627	0.668	1.377	1	1	1	68.3	108.9	72.7	150	42.96	36.5	54.58	79.55	5.34912e+06	9.22714e+06	4.09831e+06	6.91969e+06	8.53257e+06	1.37102e+07	5.69863e+06	3.53317e+06	1.05659e+07	2.62353e+07	1.17527e+07	4.21608e+06	High	High	Not Found	High	High	High	Not Found
FALSE	High	Master Protein	Glyma.19G186000.1.p	K01803 - triosephosphate isomerase (TIM) (TPI, tpiA) (1 of 5)	0	197.411	59	16	280	0	6	309	33.1	6.79	868.5	16	1.558	1.579	2.412	1	0.806426	0.480254	95.2	61.1	96.4	147.3	69.94	9.9	78.41	45.53	7.27944e+07	1.13962e+08	2.77368e+08	6.1626e+07	7.39235e+07	7.31384e+07	1.15493e+08	1.02739e+08	3.79498e+08	1.764e+08	3.30154e+08	1.45396e+08	High	High	High	High	High	High	High
FALSE	High	Master Protein	Glyma.20G114500.2.p	K00627 - pyruvate dehydrogenase E2 component (dihydrolipoamide acetyltransferase) (DLAT, aceF, pdhC) (1 of 7)	0	197.403	46	14	125	0	12	472	48.9	8.7	389.77	14	0.94	0.748	0.791	1	0.546933	0.968279	108.1	115	86	91	3.94	21.29	18.92	5.01	9.08858e+07	8.54261e+07	8.45743e+07	9.08992e+07	1.05522e+08	6.82411e+07	6.79677e+07	7.5629e+07	5.1539e+07	6.97198e+07	7.19053e+07	7.6844e+07	High	High	High	High	High	High	High
FALSE	High	Master Protein	Glyma.10G147600.2.p	PTHR11073//PTHR11073:SF17 - CALRETICULIN AND CALNEXIN // SUBFAMILY NOT NAMED (1 of 2)	0	197.326	48	20	195	0	6	420	48.1	4.59	568.37	20	1.495	1.48	2.074	1	1	1	98.9	66.1	97.9	137.2	29.24	80.41	11.46	19.34	6.72217e+07	7.89252e+07	1.16184e+08	5.28029e+07	4.74241e+07	1.80243e+08	6.98701e+07	8.78765e+07	7.81278e+07	1.45404e+08	1.0243e+08	1.0951e+08	High	High	High	High	High	High	High
FALSE	High	Master Protein	Glyma.17G037700.1.p	K02945 - small subunit ribosomal protein S1 (RP-S1, rpsA) (1 of 6)	0	197.283	46	21	297	9	12	412	45	5.24	854.09	21	0.813	0.905	0.989	1	1	1	87.7	107.9	97.6	106.7	17.77	25.69	15.36	39.73	3.18611e+08	3.74405e+08	2.61325e+08	3.91996e+08	3.55317e+08	5.65806e+08	3.26157e+08	3.54629e+08	4.3632e+08	7.18208e+08	3.71534e+08	3.87702e+08	High	High	High	High	High	High	High
FALSE	High	Master Protein	Glyma.08G346200.1.p	K17732 - mitochondrial-processing peptidase subunit beta [EC:3.4.24.64] (PMPCB, MAS1) (1 of 3)	0	197.266	58	24	139	5	5	528	58.9	6.98	417.55	24	1.16	0.936	0.915	1	1	0.866894	115.7	99.7	93.4	91.2	15.77	13.03	25.55	34.78	5.57617e+07	4.42931e+07	4.17795e+07	3.8174e+07	4.67198e+07	3.70243e+07	4.82956e+07	2.93147e+07	3.574e+07	1.80979e+07	3.73118e+07	3.49308e+07	High	High	High	High	High	Peak Found	High
FALSE	High	Master Protein	Glyma.12G210000.1.p	K00053 - ketol-acid reductoisomerase (ilvC) (1 of 3)	0	197.179	29	15	142	1	1	586	63.3	7.3	501.6	15																											High	High	Not Found	High	High	Not Found	Not Found
FALSE	High	Master Protein	Glyma.07G007000.1.p	K15718 - linoleate 9S-lipoxygenase (LOX1_5) (1 of 21)	0	197.134	38	26	102	4	17	864	96.8	6.15	294.41	26	0.875	0.469	0.398	1	0.0080908	0.00585467	127.7	145.9	68.4	58	16.04	11.7	15.4	12.23	4.01062e+07	3.13354e+07	3.01632e+07	4.22617e+07	3.39309e+07	3.58092e+07	1.2732e+07	1.6785e+07	1.69374e+07	1.42413e+07	1.72397e+07	1.38671e+07	High	High	Peak Found	High	High	Peak Found	High
FALSE	High	Master Protein	Glyma.09G202100.1.p	K01414 - oligopeptidase A [EC:3.4.24.70] (prlC) (1 of 2)	0	196.328	37	23	173	6	6	787	88.4	6.3	484.02	23	1.102	0.455	1.072	1	1	1	121.4	110.2	50.2	118.2	29.32	6.99	60.89	51.74	2.32982e+07	2.05395e+07	3.50608e+07	2.11494e+07	2.09761e+07	2.37145e+07	8.14993e+06	9.62846e+06	2.32578e+07	7.14395e+06	2.33732e+07	2.267e+07	High	High	High	High	High	Not Found	High
FALSE	High	Master Protein	Glyma.07G133200.1.p	PTHR14194//PTHR14194:SF78 - NITROGEN METABOLIC REGULATION PROTEIN NMR-RELATED // SUBFAMILY NOT NAMED (1 of 2)	0	195.907	63	17	234	0	5	331	35.6	8.76	875.82	17	1.31	0.853	2.151	1	0.895441	1	98.6	75.3	64.2	161.9	13.87	60.92	36.74	34.54	1.46366e+08	1.78347e+08	1.93241e+08	1.35453e+08	1.36122e+08	3.56812e+08	6.61372e+07	1.1611e+08	1.45535e+08	3.64756e+08	1.7493e+08	2.92827e+08	High	High	High	High	High	High	High
FALSE	High	Master Protein	Glyma.04G154300.3.p	PF01429 - Methyl-CpG binding domain (MBD) (1 of 21)	0	195.41	57	20	153	1	11	287	32.1	4.88	517.19	20	2.92	3.095	3.991	0.293234	0.159619	0.0877218	106.1	36.3	112.5	145	44.54	43.41	46.68	18.63	9.58244e+07	1.04064e+08	2.0341e+08	3.56333e+07	3.26382e+07	6.82578e+07	1.00591e+08	1.10295e+08	2.2172e+08	1.38152e+08	1.42204e+08	1.90713e+08	High	High	High	High	High	High	High
FALSE	High	Master Protein	Glyma.15G100200.1.p		0	195.254	64	17	169	16	16	332	36.5	6.21	610.2	17	1.434	1.654	2.369	1	1	0.802676	88.8	62	102.5	146.7	59.56	54.58	72.02	21.64	2.0855e+08	2.20761e+08	5.51879e+08	1.53965e+08	1.13056e+08	3.1271e+08	2.54673e+08	1.75765e+08	6.65918e+08	3.01107e+08	3.64705e+08	4.62664e+08	High	High	High	High	High	High	High
FALSE	High	Master Protein	Glyma.04G190100.2.p	KOG0131 - Splicing factor 3b, subunit 4 (1 of 43)	0	194.907	41	10	220	2	6	305	33.8	4.82	718.09	10	1.106	1.408	2.813	1	1	0.767546	69.9	63.2	89	177.8	57.13	79.02	41.06	17.72	1.02445e+08	1.19416e+08	2.73733e+08	9.8998e+07	1.07979e+08	3.63761e+08	1.01733e+08	1.52057e+08	2.34003e+08	3.0375e+08	3.02645e+08	4.06876e+08	High	High	High	High	High	High	High
FALSE	High	Master Protein	Glyma.12G122900.1.p	K00053 - ketol-acid reductoisomerase (ilvC) (1 of 3)	0	194.663	26	13	124	0	6	576	62.7	7.28	457.07	13	1.024	0.736	0.962	1	1	1	110	107.5	79.1	103.4	19.94	24.67	43.64	25.22	6.64638e+07	5.66328e+07	4.42641e+07	6.46977e+07	5.53257e+07	3.88804e+07	3.14842e+07	4.07399e+07	7.13996e+07	5.30219e+07	8.02872e+07	5.32246e+07	High	High	High	High	High	High	High
FALSE	High	Master Protein	Glyma.17G046500.1.p	K03564 - peroxiredoxin Q/BCP (BCP, PRXQ, DOT5) (1 of 2)	0	194.38	46	14	395	3	3	213	23.3	9.41	1277.34	14	1.744	0.742	5.844	1	1	0.196057	74.8	42.9	31.8	250.5	17.63	48.03	30.3	61.69	4.4109e+07	6.18528e+07	4.93041e+07	4.82247e+07	2.82663e+07	1.84015e+07	2.09771e+07	3.0418e+07	1.69703e+07	1.65184e+08	4.64258e+07	2.20136e+08	High	High	Peak Found	High	High	High	High
FALSE	High	Master Protein	Glyma.03G244800.2.p	PTHR10314//PTHR10314:SF101 - SER/THR DEHYDRATASE, TRP SYNTHASE // SUBFAMILY NOT NAMED (1 of 6)	0	194.3	63	16	162	7	8	325	34.4	5.63	538.74	16	0.962	2.139	0.4	1	0.630046	1	85.5	88.9	190.1	35.5	27.84	75.26	27.25	58	3.59741e+08	2.51766e+08	2.12042e+08	3.39566e+08	2.61726e+08	3.32917e+07	7.04744e+08	4.0207e+08	5.59852e+08	8.29758e+07	2.33521e+08	1.04574e+08	High	High	High	High	High	Peak Found	High
FALSE	High	Master Protein	Glyma.19G238800.1.p	K02955 - small subunit ribosomal protein S14e (RP-S14e, RPS14) (1 of 6)	0	193.211	63	12	139	0	12	150	16.3	10.87	531.16	12	1.157	1.433	0.886	1	1	1	103.4	89.4	128.1	79.2	29.74	13.6	43.67	21.42	4.03787e+08	4.19541e+08	2.31117e+08	3.4902e+08	3.86288e+08	2.9357e+08	5.00298e+08	5.24608e+08	2.03472e+08	3.09308e+08	4.34996e+08	3.02187e+08	High	High	High	High	High	High	High
FALSE	High	Master Protein	Glyma.05G207500.1.p	PTHR11588//PTHR11588:SF124 - TUBULIN // SUBFAMILY NOT NAMED (1 of 2)	0	193.207	48	17	161	0	5	446	49.9	5.01	466.48	17	0.883	1.174	1.107	1	1	1	84.8	96.1	112.8	106.3	9.66	16.48	20.42	31.83	1.96247e+07	1.69417e+07	1.64523e+07	2.48725e+07	1.91865e+07	1.86609e+07	2.37997e+07	1.59061e+07	2.25181e+07	1.33688e+07	2.61468e+07	2.12349e+07	High	High	High	High	High	Not Found	High
FALSE	High	Master Protein	Glyma.18G251400.1.p	K13199 - plasminogen activator inhibitor 1 RNA-binding protein (SERBP1) (1 of 5)	0	192.963	52	14	153	7	7	370	39.9	6.3	507.56	14	1.275	1.258	2.987	1	1	0.759367	78.2	61.4	77.2	183.3	20.28	99.67	13.2	35.46	1.01375e+08	9.09349e+07	1.33174e+08	7.95327e+07	6.80892e+07	3.73568e+08	1.00048e+08	8.89527e+07	1.15644e+08	2.37574e+08	2.1778e+08	4.02468e+08	High	High	High	High	High	High	High
FALSE	High	Master Protein	Glyma.05G152000.1.p	K01251 - adenosylhomocysteinase (E3.3.1.1, ahcY) (1 of 3)	0	192.935	42	17	114	0	3	503	55.1	6.14	361.49	17	0.778	0.408	0.376	1	0.141297	0.144278	121.5	156.1	63.7	58.7	4.85	20.52	47.86	11.63	3.65746e+07	3.32033e+07	3.52599e+07	3.34304e+07	5.07508e+07	4.52996e+07	9.46835e+06	1.84772e+07	2.69986e+07	1.70428e+07	1.59793e+07	1.99467e+07	High	High	Peak Found	High	High	Not Found	Peak Found
FALSE	High	Master Protein	Glyma.05G221100.1.p	K01961 - acetyl-CoA carboxylase, biotin carboxylase subunit (accC) (1 of 2)	0	191.928	46	20	171	1	20	539	58.9	7.5	486.1	20	1.017	0.716	0.419	1	1	0.0408047	129	126.9	90.9	53.2	23.7	20.14	7.74	16.93	2.96387e+08	2.99508e+08	1.90387e+08	2.91565e+08	3.03424e+08	2.05028e+08	2.08837e+08	2.20631e+08	1.89036e+08	9.50089e+07	1.3351e+08	1.22178e+08	High	High	High	High	High	High	High
FALSE	High	Master Protein	Glyma.18G286500.1.p	PTHR31407:SF4 - PSBP-LIKE PROTEIN 1, CHLOROPLASTIC (1 of 2)	0	191.706	52	17	279	0	2	236	26.8	9.45	870.57	17	0.702	0.5	1.546	1	1	1	74.9	106.7	53.3	165	21.13	49.06	105.32	10.93	3.97368e+07	4.05549e+07	5.6859e+07	5.77697e+07	5.62685e+07	1.24607e+08	1.47248e+07	2.88714e+07	1.2133e+08	1.05741e+08	8.6866e+07	8.93015e+07	High	High	High	High	High	High	High
FALSE	High	Master Protein	Glyma.10G241000.1.p	5.4.2.5 - Phosphoglucomutase (glucose-cofactor) / Glucose-1-phosphate phosphotransferase (1 of 2)	0	191.485	40	21	145	11	11	628	68.4	6.42	416.03	21	1.666	0.762	1.002	1	1	1	150.4	90.3	68.8	90.5	47.98	28.08	39.46	74.21	2.69828e+08	1.2918e+08	3.76431e+08	1.67348e+08	1.61975e+08	9.58791e+07	1.23504e+08	1.13728e+08	2.23148e+08	1.02587e+08	1.62362e+08	4.22371e+08	High	High	High	High	High	Peak Found	High
FALSE	High	Master Protein	Glyma.11G187500.1.p	PTHR18937//PTHR18937:SF221 - STRUCTURAL MAINTENANCE OF CHROMOSOMES SMC FAMILY MEMBER // SUBFAMILY NOT NAMED (1 of 3)	0	191.316	48	33	184	0	20	731	82	5.39	468.43	33	1.383	1.32	1.958	0.881034	0.61696	0.359644	97.7	70.6	93.3	138.4	27.62	10.68	37.2	22.43	8.47882e+07	9.10189e+07	1.37593e+08	5.58701e+07	6.88239e+07	6.58133e+07	8.68942e+07	8.01405e+07	1.51724e+08	8.4815e+07	1.29632e+08	1.28894e+08	High	High	High	High	High	High	Peak Found
FALSE	High	Master Protein	Glyma.04G008300.1.p	PTHR11627:SF16 - FRUCTOSE-BISPHOSPHATE ALDOLASE 1, CHLOROPLASTIC-RELATED (1 of 4)	0	191.203	54	19	330	0	9	395	42.5	6.79	834.17	19	1.138	0.886	0.551	1	1	1	127.3	111.9	99.2	61.7	28.08	60.53	38.79	82.26	1.75973e+09	1.60721e+09	9.8957e+08	1.41247e+09	1.43693e+09	3.17931e+08	1.25205e+09	1.36138e+09	5.94494e+08	7.78579e+08	1.9656e+09	3.33259e+08	High	High	High	High	High	High	High
FALSE	High	Master Protein	Glyma.06G231500.1.p	K00026 - malate dehydrogenase (MDH2) (1 of 7)	0	191.146	54	13	154	3	3	345	36	8.1	593.15	13	0.01	0.01	5.557			0.148729		61		339		75.32		7.4				1.18768e+07	3.90478e+06	3.29254e+06				1.98389e+07	2.30056e+07	2.16984e+07	High	High	Not Found	High	High	High	Not Found
FALSE	High	Master Protein	Glyma.02G304500.2.p	PTHR22572:SF101 - GLUCOSE-1-PHOSPHATE ADENYLYLTRANSFERASE SMALL SUBUNIT, CHLOROPLASTIC (1 of 2)	0	189.88	46	22	216	5	5	515	56.3	6.74	542.37	22	0.924	0.595	0.89	1	0.410252	1	108.4	117.4	69.8	104.4	19.35	13.7	30.93	12.29	2.95223e+07	3.09926e+07	4.15907e+07	4.16139e+07	3.35591e+07	3.26758e+07	1.89451e+07	1.99529e+07	3.2096e+07	2.51966e+07	3.22246e+07	2.98603e+07	High	High	High	High	High	Peak Found	High
FALSE	High	Master Protein	Glyma.11G100800.2.p	PTHR32010:SF6 - PHOTOSYSTEM II STABILITY/ASSEMBLY FACTOR HCF136, CHLOROPLASTIC (1 of 3)	0	189.717	57	15	186	1	1	352	38.6	5.27	564.99	15	0.526	0.01	0.01	0.378053			137.8	262.2			9.48	28.93			4.08246e+06	4.29797e+06	3.56401e+06	7.7637e+06	8.87541e+06	4.8597e+06							High	High	Not Found	High	High	Not Found	Not Found
FALSE	High	Master Protein	Glyma.16G018500.1.p	K13679 - granule-bound starch synthase [EC:2.4.1.242] Glc a1-4 Glc (WAXY) (1 of 4)	0	189.414	38	20	139	3	3	619	68.1	7.06	459.67	20	0.865	0.605	0.132	1	0.865093	0.00556612	133	153.8	93	20.2	22.91	13.86	24.02	48.29	2.62495e+07	2.73363e+07	1.74461e+07	2.74186e+07	3.03584e+07	3.59408e+07	1.48364e+07	1.83572e+07	2.39047e+07	1.84899e+06	5.47091e+06	3.99289e+06	High	High	High	High	High	Not Found	High
FALSE	High	Master Protein	Glyma.12G025400.1.p	PF16320 - Ribosomal protein L7/L12 dimerisation domain (Ribosomal_L12_N) (1 of 2)	0	189.311	69	15	682	4	4	190	20	5.68	1905.01	15	0.778	0.656	8.352	1	1	1	28.9	37.1	24.3	309.7	146.4	131.76	161.39	33.43	5.54971e+07	5.34549e+07	9.46862e+08	6.55325e+07	7.13259e+07	7.20905e+08	6.27859e+06	46815658	1.10559e+09	5.95702e+08	7.00527e+08	3.44723e+08	High	High	High	High	High	High	High
FALSE	High	Master Protein	Glyma.02G085300.1.p	K02981 - small subunit ribosomal protein S2e (RP-S2e, RPS2) (1 of 5)	0	189.042	44	12	116	0	3	275	30.2	10.36	389.56	12	1.397	1.286	1.895	1	1	0.697666	100.2	71.7	92.2	135.9	57.19	50.31	39.83	4.11	1.00724e+08	8.35763e+07	2.47435e+07	5.98249e+07	7.83926e+07	2.46285e+07	7.69144e+07	9.72393e+07	4.08642e+07	1.20937e+08	1.13367e+08	1.12179e+08	High	High	High	High	High	Peak Found	High
FALSE	High	Master Protein	Glyma.02G204000.1.p	K01255 - leucyl aminopeptidase (CARP, pepA) (1 of 3)	0	188.812	49	22	147	5	7	570	59.6	7.12	446.13	22	0.894	1.11	1.004	1	1	1	89.2	99.8	110.8	100.2	36.37	24.57	39.66	30.48	1.19613e+08	1.21613e+08	2.16754e+08	1.13087e+08	1.36039e+08	1.82481e+08	1.27412e+08	1.50995e+08	2.61017e+08	1.36555e+08	1.65546e+08	8.72974e+07	High	High	High	High	High	Peak Found	High
FALSE	High	Master Protein	Glyma.15G035600.1.p	PTHR12815:SF18 - PROTEIN TOC75-3, CHLOROPLASTIC-RELATED (1 of 2)	0	188.369	36	20	105	2	2	794	86.8	7.42	303.07	20	0.01	0.889	0.01		1			211.7	188.3			19.33	11.6					3.293e+06	4.88226e+06	4.19502e+06	3.73026e+06	4034289	3.19729e+06				High	Not Found	Not Found	High	High	Not Found	High
FALSE	High	Master Protein	Glyma.12G159300.1.p	K00026 - malate dehydrogenase (MDH2) (1 of 7)	0	188.044	54	13	168	3	3	345	36.1	8.12	643.28	13	1.019	0.991	1.514	1	1	0.664242	90.1	88.4	87.7	133.8	19.82	54.81	36.95	15.46	1.23581e+08	1.17589e+08	8.37682e+07	1.17903e+08	1.15421e+08	3.25488e+07	1.19667e+08	1.14434e+08	5.54511e+07	1.77615e+08	1.747e+08	1.32928e+08	High	High	High	High	High	High	High
FALSE	High	Master Protein	Glyma.18G142500.2.p	K08244 - alpha-glucan, water dikinase (E2.7.9.4) (1 of 2)	0	188.009	26	26	128	3	3	1459	164	6.77	369.23	26	1.291	0.587	0.238	1	0.371958	0.00865606	165.7	128.4	75.3	30.5	38.49	18.49	6.89	7.36	1.27808e+07	1.02772e+07	5.55247e+06	9.77873e+06	6.77801e+06	7.96103e+06	4.67073e+06	4.89117e+06	4.26474e+06	1.89352e+06	1.79851e+06	2.07676e+06	High	Peak Found	Not Found	High	High	Not Found	Peak Found
FALSE	High	Master Protein	Glyma.13G338700.1.p	PTHR12815:SF18 - PROTEIN TOC75-3, CHLOROPLASTIC-RELATED (1 of 2)	0	187.952	38	21	109	3	3	800	87.5	7.58	298.69	21	1.17	0.522	0.437	1	0.0115936	0.00634439	149.6	127.9	66.7	55.9	4.64	13.14	21.55	9.29	6.43699e+06	6.35846e+06	5.90104e+06	5.41623e+06	6.76164e+06	5.43576e+06	1.93944e+06	2.83575e+06	2.956e+06	2.57475e+06	2.13628e+06	2.37564e+06	High	High	Peak Found	High	High	Peak Found	Peak Found
FALSE	High	Master Protein	Glyma.19G007800.1.p	PTHR22939:SF81 - PROTEASE DO-LIKE 1, CHLOROPLASTIC (1 of 2)	0	187.88	42	15	170	1	2	431	45.6	7.11	610.81	15	1.072	0.756	1.64	1	1	0.934349	96	89.5	67.7	146.8	31.27	19.34	60.57	23.9	2.72807e+07	4.42199e+07	5.27076e+07	4.12598e+07	4.04374e+07	5.62318e+07	2.93914e+07	31181203	7.91041e+07	9.05886e+07	5.70394e+07	6.76492e+07	High	High	High	High	High	High	High
FALSE	High	Master Protein	Glyma.13G113200.1.p	K03564 - peroxiredoxin Q/BCP (BCP, PRXQ, DOT5) (1 of 2)	0	187.874	46	14	403	3	3	214	23.3	9.47	1275.08	14	1.645	1.417	2.086	1	1	1	107	65.1	92.2	135.7	27.1	56.07	79.42	24.67	1.6103e+08	1.77502e+08	1.01866e+08	1.5268e+08	9.79068e+07	4.29533e+07	1.97657e+08	1.38718e+08	1.52542e+07	2.04208e+08	1.40109e+08	2.32763e+08	High	High	Peak Found	High	High	High	High
FALSE	High	Master Protein	Glyma.13G365500.1.p	PTHR33729:SF1 - METHYL-CPG-BINDING DOMAIN-CONTAINING PROTEIN 10 (1 of 2)	0	187.762	63	19	120	0	14	276	30.4	4.59	442.46	19	4.517	4.245	4.417	0.0642564	0.0440303	0.0585858	127.4	28.2	119.8	124.6	9.83	52.67	17.21	26.76	1.46711e+08	1.23701e+08	1.48157e+08	2.39895e+07	3.24776e+07	6.41775e+07	1.15479e+08	1.37872e+08	1.63254e+08	8.63315e+07	1.44974e+08	1.43448e+08	High	High	High	High	High	High	High
FALSE	High	Master Protein	Glyma.08G108800.1.p	K01251 - adenosylhomocysteinase (E3.3.1.1, ahcY) (1 of 3)	0	187.164	43	17	121	3	3	485	53.3	5.88	385.6	17	0.531	0.201	0.01	0.235673	0.00599829		122.7	230.9	46.4		19.13	6.22	26.33		2.27973e+07	1.54681e+07	1.92138e+07	3.61546e+07	3.61962e+07	3.24115e+07	4.98789e+06	8611280	7.26255e+06				High	High	Not Found	High	High	Not Found	High
FALSE	High	Master Protein	Glyma.10G212900.1.p	K03231 - elongation factor 1-alpha (EEF1A) (1 of 8)	0	186.306	30	10	230	1	1	448	49.5	9.07	763.15	10																											Not Found	Not Found	Not Found	Not Found	Not Found	Not Found	Not Found
FALSE	High	Master Protein	Glyma.09G243200.1.p	K13199 - plasminogen activator inhibitor 1 RNA-binding protein (SERBP1) (1 of 5)	0	186.178	54	12	133	5	5	367	39.4	6.19	446.82	12	1.072	0.993	2.316	1	1	0.774122	79.7	74.3	73.8	172.1	9.76	42.4	22.79	44.01	9.87379e+07	8.12204e+07	8.94805e+07	8.3462e+07	8.23224e+07	1.63482e+08	1.0694e+08	6.81068e+07	8.29e+07	9.9684e+07	1.93292e+08	2.61805e+08	High	High	High	High	High	High	High
FALSE	High	Master Protein	Glyma.08G138200.2.p	5.5.1.4 - Inositol-3-phosphate synthase / Myo-inositol-1-phosphate synthase (1 of 4)	0	186.056	38	18	132	0	2	510	56.4	5.55	354.99	18	3.102	2.378	4.431	0.0976727	0.33136	0.0270198	113.7	36.7	87.2	162.4	2.48	27.52	36.63	38.24	2.09213e+07	2.03124e+07	1.99193e+07	6.54784e+06	3.90097e+06	6.69754e+06	7.73175e+06	1.66966e+07	1.55703e+07	2.9011e+07	3.87724e+07	1.71532e+07	High	High	High	High	Peak Found	Peak Found	Peak Found
FALSE	High	Master Protein	Glyma.20G249300.1.p	PTHR11071:SF11 - PEPTIDYL-PROLYL CIS-TRANS ISOMERASE C (1 of 2)	0	185.964	36	11	190	0	4	253	27.1	9.48	558.07	11	1.287	0.687	1.749	1	1	0.96798	109	84.7	58.2	148.1	33.28	14.74	73.43	11.39	1.25514e+08	1.57981e+08	2.37884e+08	1.4809e+08	1.22797e+08	1.114e+08	3.70171e+07	8.43654e+07	1.83084e+08	1.88188e+08	2.1475e+08	2.36686e+08	High	High	High	High	High	High	High
FALSE	High	Master Protein	Glyma.05G180600.1.p	K01858 - myo-inositol-1-phosphate synthase (E5.5.1.4, INO1) (1 of 3)	0	185.057	40	18	131	0	1	510	56.4	5.78	358.36	18	1.058	0.375	0.351	1	0.842687	0.418196	152	143.7	53.8	50.5	57.09	31.87	53.56	21.97	8.9555e+06	1.1352e+07	2.81943e+06	8.46494e+06	5.10897e+06	1.00083e+07	3.17106e+06	6.09294e+06	2.1651e+06	3.02352e+06	2.97515e+06	1.98713e+06	Peak Found	High	Peak Found	High	High	High	Peak Found
FALSE	High	Master Protein	Glyma.07G049900.1.p	K13679 - granule-bound starch synthase [EC:2.4.1.242] Glc a1-4 Glc (WAXY) (1 of 4)	0	184.436	38	20	135	3	3	619	68	7.06	438.37	20	0.81	0.581	0.493	1	0.240588	0.111645	112.3	138.7	80.6	68.4	18.13	21.65	24.56	17.2	2.54293e+07	3.13802e+07	2.19695e+07	2.68113e+07	4.08277e+07	3.13933e+07	1.8242e+07	2.41421e+07	1.48806e+07	1.51723e+07	1.54719e+07	2.03838e+07	High	High	High	High	High	Peak Found	High
FALSE	High	Master Protein	Glyma.08G363700.1.p	K01880 - glycyl-tRNA synthetase (GARS, glyS1) (1 of 1)	0	184.226	34	24	116	19	24	725	81	7.39	328.02	24	0.846	0.875	0.707	1	1	0.659041	98.7	116.7	102.1	82.5	13.29	23.02	36.28	14.24	1.14291e+08	1.02833e+08	1.33571e+08	1.35146e+08	1.2967e+08	1.93093e+08	1.02451e+08	1.1823e+08	1.96703e+08	9.51343e+07	9.54879e+07	1.20924e+08	High	High	High	High	High	Peak Found	High
FALSE	High	Master Protein	Glyma.14G089800.1.p	PTHR33088:SF9 - HYDROXYPROLINE-RICH GLYCOPROTEIN FAMILY PROTEIN (1 of 2)	0	183.755	65	17	114	15	17	353	39.2	8.63	318.98	17	1.236	0.728	1.61	1	1	1	108.1	87.5	63.6	140.8	74.51	73.38	79.65	30.72	1.44714e+08	1.63132e+08	5.01904e+08	1.31983e+08	1.1956e+08	4.02751e+08	9.60407e+07	8.24632e+07	3.16655e+08	2.94499e+08	1.59118e+08	2.12448e+08	High	High	High	Peak Found	High	High	High
FALSE	High	Master Protein	Glyma.02G198400.1.p	K03386 - peroxiredoxin (alkyl hydroperoxide reductase subunit C) [EC:1.11.1.15] (E1.11.1.15, PRDX, ahpC) (1 of 2)	0	183.455	47	10	246	0	10	260	28.5	6.4	970.27	10	1.236	1.24	1.124	1	1	1	107.5	86.9	107.8	97.8	8.99	53.67	27.44	59.03	2.61961e+09	3.06429e+09	3.08417e+09	2.47951e+09	2.69754e+09	7.58857e+08	2.1642e+09	3.07531e+09	3.81834e+09	3.01371e+09	2.78754e+09	6.95257e+08	High	High	High	High	High	High	High
FALSE	High	Master Protein	Glyma.05G089000.2.p	K03231 - elongation factor 1-alpha (EEF1A) (1 of 8)	0	183.39	26	11	242	0	1	447	49.3	9.06	788.95	11	1.177	0.896	3.089	1	1	1	76.4	64.9	58.2	200.5	114.4	86.16	8.45	49.84	1.5974e+07	2.2846e+07	1.32222e+08	1.49732e+07	1.94072e+07	6.79518e+07	1.74644e+07	17398184	1.49998e+07	6.01084e+07	1.97914e+07	5.99549e+07	High	High	Peak Found	High	High	Peak Found	Peak Found
FALSE	High	Master Protein	Glyma.02G141800.1.p	K00383 - glutathione reductase (NADPH) (GSR, gor) (1 of 4)	0	182.583	42	16	109	2	2	545	58.6	7.81	308.06	16	0.025	0.01	0.049	0.000800998		0.000322542	9.3	372.6		18.1	5.77	17.94		24.33	1.08103e+06	1.05758e+06	1.17784e+06	5.19298e+07	3.62373e+07	4.32581e+07				3.05613e+06	2.00441e+06	2.10233e+06	High	High	Not Found	Not Found	High	Not Found	Not Found
FALSE	High	Master Protein	Glyma.10G127800.1.p	PTHR11353//PTHR11353:SF80 - CHAPERONIN // SUBFAMILY NOT NAMED (1 of 4)	0	182.245	45	26	223	1	1	575	61.1	6.24	558.16	26																											Not Found	Not Found	Not Found	Not Found	Not Found	Not Found	Not Found
FALSE	High	Master Protein	Glyma.05G026300.1.p	PTHR11540:SF14 - MALATE DEHYDROGENASE, CHLOROPLASTIC (1 of 2)	0	182.026	45	14	141	7	7	413	43.6	6.92	445.06	14	1.334	1.779	1.964	1	0.361253	0.119222	87.8	65.8	117.1	129.3	24.02	13.2	24.99	10.21	2.6944e+07	3.40587e+07	4.3638e+07	2.55087e+07	3.18401e+07	2.55354e+07	4.54338e+07	3.30786e+07	5.53313e+07	5.01626e+07	5.69937e+07	4.6708e+07	High	High	High	High	High	Peak Found	High
FALSE	High	Master Protein	Glyma.13G028400.1.p	K00549 - 5-methyltetrahydropteroyltriglutamate--homocysteine methyltransferase (metE) (1 of 6)	0	181.873	21	14	142	1	2	803	89	6.77	445.3	14	0.995	1.81	0.01	1	1		104.6	105.1	190.3		139.28	17.33	47.98		3.75749e+06	4.1716e+06	5.27785e+07	3.16926e+06	4.19088e+06	4.46544e+06	8.24258e+06	7585142	2.78874e+06				Peak Found	Peak Found	Peak Found	High	High	Not Found	Peak Found
FALSE	High	Master Protein	Glyma.10G267000.1.p	1.12.98.4 - Sulfhydrogenase / Sulfur reductase (1 of 1)	0	180.855	51	11	135	3	11	295	32	7.58	454.98	11	1.138	1.245	1.383	1	0.988455	0.925361	95.5	83.9	104.5	116.1	12.97	34.89	36.05	33.56	1.6413e+08	1.80592e+08	2.11493e+08	1.58733e+08	1.68149e+08	8.15624e+07	1.44678e+08	1.97674e+08	2.95845e+08	2.1957e+08	2.64526e+08	1.29689e+08	High	High	High	High	High	High	High
FALSE	High	Master Protein	Glyma.10G113100.1.p	PTHR22912:SF48 - NADPH-DEPENDENT THIOREDOXIN REDUCTASE 3 (1 of 2)	0	180.375	41	15	112	0	5	519	56.6	6.89	405.87	15	1.068	1.023	0.663	1	1	1	113.8	106.5	109	70.6	4.56	13.13	14.01	72.46	2.40324e+07	2.26795e+07	2.1978e+07	2.14749e+07	2.12259e+07	1.68409e+07	2.69576e+07	2.09945e+07	2.1716e+07	5.92267e+06	2.94348e+07	1.4072e+07	High	High	Peak Found	High	High	Peak Found	High
FALSE	High	Master Protein	Glyma.12G193800.1.p	K01681 - aconitate hydratase (ACO, acnA) (1 of 6)	0	180.329	28	20	126	3	3	984	107.2	7.99	320.45	20	0.73	0.01	0.989	0.0441796		1	107.4	147.1		145.5	3.24	8.84		6.09	4.47703e+06	4.68099e+06	4.77049e+06	7.06584e+06	5.92743e+06	6.4084e+06				5.92156e+06	6.69057e+06	6.33913e+06	High	High	Not Found	High	High	Not Found	Not Found
FALSE	High	Master Protein	Glyma.03G110100.1.p	K02926 - large subunit ribosomal protein L4 (RP-L4, MRPL4, rplD) (1 of 6)	0	179.688	42	14	293	3	3	310	33.8	7.06	911.63	14	0.771	0.946	1.21	1	1	1	78.5	101.8	96.3	123.3	71.8	25.89	24.46	71.95	7.58982e+07	1.37753e+08	2.40938e+07	9.63479e+07	9.84129e+07	1.48679e+08	9.30835e+07	1.1277e+08	6.81832e+07	2.45472e+08	4.9541e+07	1.19119e+08	High	High	High	High	High	High	High
FALSE	High	Master Protein	Glyma.18G040100.1.p	PTHR11260:SF171 - GLUTATHIONE S-TRANSFERASE DHAR3, CHLOROPLASTIC (1 of 4)	0	179.645	64	17	151	5	5	261	29	8.69	519.34	17	1.07	1.304	1.722	1	1	1	84	78.5	102.4	135.2	45.21	39.09	47.87	34.66	6.73814e+07	7.43362e+07	1.45606e+08	5.93467e+07	6.94908e+07	1.1985e+08	6.00023e+07	9.06358e+07	1.55724e+08	1.53689e+08	1.1966e+08	7.37644e+07	High	High	High	High	High	High	High
FALSE	High	Master Protein	Glyma.08G082900.1.p	K08912 - light-harvesting complex II chlorophyll a/b binding protein 1 (LHCB1) (1 of 5)	0	179.382	70	13	599	2	2	263	27.9	5.43	1831.08	13	0.653	0.97	0.23	1	1	1	91.6	140.2	136	32.3	68.14	75.45	68.54	59.69	3.12498e+09	1.64372e+09	6.71419e+08	2.51639e+09	3.11636e+09	2.89577e+08	2.7132e+09	2.44041e+09	3.94245e+08	5.79326e+08	8.07886e+08	1.88095e+08	High	High	High	High	High	High	High
FALSE	High	Master Protein	Glyma.17G020600.1.p	K01006 - pyruvate, orthophosphate dikinase (ppdK) (1 of 1)	0	179.242	33	22	137	7	7	950	104.2	6.19	346.31	22	0.792	0.545	0.352	1	1	0.561065	117.9	148.8	81	52.4	18.57	56.83	21.66	39.16	1.01887e+08	1.00908e+08	7.19482e+07	1.27377e+08	1.62417e+08	4.07665e+07	6.9368e+07	9.37347e+07	6.278e+07	4.48284e+07	6.03833e+07	2.61421e+07	High	High	Peak Found	High	High	Peak Found	High
FALSE	High	Master Protein	Glyma.05G048000.1.p	K02113 - F-type H+-transporting ATPase subunit delta (ATPF1D, atpH) (1 of 2)	0	179.042	54	12	283	4	4	248	26.8	7.56	902.97	12	1.595	1.073	0.522	1	1	1	152.2	95.5	102.5	49.9	30.55	54.28	67.57	89.56	1.31186e+08	1.91505e+08	2.47214e+08	1.45446e+08	1.20075e+08	3.96693e+07	1.28874e+08	1.08046e+08	3.4462e+08	2.89013e+07	1.86686e+08	6.27078e+07	High	High	High	High	High	Peak Found	High
FALSE	High	Master Protein	Glyma.05G128000.1.p	K08912 - light-harvesting complex II chlorophyll a/b binding protein 1 (LHCB1) (1 of 5)	0	178.788	71	13	581	3	3	263	27.9	5.43	1782.17	13	0.65	0.991	0.393	1	1	1	85.6	131.9	130.7	51.8	72.54	71.89	65.4	67.54	3.11714e+09	1.43786e+09	6.52241e+08	2.21379e+09	2.4679e+09	2.89265e+08	2.6633e+09	2.19372e+09	4.61848e+08	8.70098e+08	1.00596e+09	1.54895e+08	High	High	High	High	High	High	High
FALSE	High	Master Protein	Glyma.15G109300.1.p	K00605 - aminomethyltransferase (gcvT, AMT) (1 of 4)	0	178.575	31	12	256	0	1	407	44.3	8.56	810.26	12																											High	Not Found	Not Found	Not Found	Not Found	Not Found	Not Found
FALSE	High	Master Protein	Glyma.05G178000.1.p	K02904 - large subunit ribosomal protein L29 (RP-L29, rpmC) (1 of 2)	0	178.206	44	14	194	6	6	161	18.3	10.08	614.05	14	0.918	0.569	0.702	1	0.270621	0.933744	115.1	125.4	71.4	88.1	12.93	15.74	18.88	35.76	7.09157e+08	5.9483e+08	7.71071e+08	8.44439e+08	7.72722e+08	6.15458e+08	4.3983e+08	4.6495e+08	3.20615e+08	5.42681e+08	3.94308e+08	8.04299e+08	High	High	High	High	High	High	High
FALSE	High	Master Protein	Glyma.05G239000.1.p	K02981 - small subunit ribosomal protein S2e (RP-S2e, RPS2) (1 of 5)	0	177.984	40	10	108	0	1	272	29.8	10.32	355.21	10	0.823	0.333	0.371	1	0.0723493	0.051027	130.3	158.3	52.7	58.7	1.55	10.86	50.46	11.32	9.35688e+06	9.24319e+06	9.07201e+06	1.04344e+07	1.28876e+07	1.12351e+07	3.73658e+06	7.68327e+06	3.17933e+06	4.81122e+06	3.86168e+06	4.16845e+06	High	High	Not Found	High	High	Not Found	Peak Found
FALSE	High	Master Protein	Glyma.06G100200.1.p	KOG0106//KOG0131 - Alternative splicing factor SRp55/B52/SRp75 (RRM superfamily) // Splicing factor 3b, subunit 4 (1 of 1)	0	176.835	55	14	166	7	7	315	35	6.81	522.32	14	0.902	1.074	1.467	1	1	1	81.2	90	96.7	132.1	39.87	46.43	10.42	29.05	1.37271e+08	1.71088e+08	7.17319e+07	1.40645e+08	1.52119e+08	3.06782e+08	1.38928e+08	1.63422e+08	1.70088e+08	2.23177e+08	2.33121e+08	1.30178e+08	High	High	High	High	High	High	High
FALSE	High	Master Protein	Glyma.12G032300.1.p	PTHR31356:SF9 - L-ASCORBATE PEROXIDASE 3, PEROXISOMAL (1 of 2)	0	176.602	44	17	137	1	5	287	31.7	6.74	438.74	17	2.497	0.989	0.769	0.444112	1	0.876747	190.1	76.1	75.3	58.5	12.79	1.67	51.81	46.64	5.2777e+07	4.95748e+07	6.30707e+07	2.1132e+07	2.15448e+07	2.08413e+07	2.09097e+07	1.81159e+07	4.43277e+07	6.75582e+06	1.9442e+07	1.62569e+07	High	High	High	High	High	High	High
FALSE	High	Master Protein	Glyma.18G255700.1.p	PTHR11743//PTHR11743:SF31 - VOLTAGE-DEPENDENT ANION-SELECTIVE CHANNEL // SUBFAMILY NOT NAMED (1 of 6)	0	175.741	64	14	169	3	3	276	29.8	8.65	620.51	14	0.798	0.378	0.787	1	1	1	107.8	135	51	106.2	73.34	61.16	42.96	65.87	1.98636e+07	2.99343e+07	3.89967e+06	2.64659e+07	2.48782e+07	5.6075e+06	6.79931e+06	1.56768e+07	9.39804e+06	5.31032e+07	1.95699e+07	1.78483e+07	High	High	Peak Found	High	High	Peak Found	High
FALSE	High	Master Protein	Glyma.16G189500.1.p	PF03766 - Remorin, N-terminal region (Remorin_N) (1 of 8)	0	175.007	66	18	210	3	3	205	22.3	5.82	741.84	18	0.675	0.926	1.058	1	1	1	73.8	109.3	101.2	115.7	64.6	19.33	48.78	27.41	2.01953e+08	1.79437e+08	5.30061e+08	2.10852e+08	2.99192e+08	3.04066e+08	2.77023e+08	2.08583e+08	5.19628e+08	2.15952e+08	3.16675e+08	3.81768e+08	High	High	High	High	High	High	High
FALSE	High	Master Protein	Glyma.08G180000.1.p	K08917 - light-harvesting complex II chlorophyll a/b binding protein 6 (LHCB6) (1 of 3)	0	174.618	47	12	238	4	4	261	27.7	6.6	738.55	12	0.475	0.518	0.146	1	1	1	88.8	187	96.9	27.2	83.89	80.51	59.29	101.22	1.149e+09	5.63996e+08	1.24671e+08	1.3227e+09	1.18771e+09	6.41438e+07	6.1525e+08	8.09046e+08	1.86826e+08	1.72955e+08	5.81251e+08	5.9323e+07	High	High	High	High	High	High	High
FALSE	High	Master Protein	Glyma.09G227200.1.p	K02863 - large subunit ribosomal protein L1 (RP-L1, MRPL1, rplA) (1 of 2)	0	174.054	41	17	313	0	17	345	37.9	9.2	782.27	17	1.204	1.251	2.079	1	1	0.754641	87	72.3	90.4	150.2	55.68	41.4	57.52	13.52	6.71791e+08	7.91437e+08	1.7637e+09	5.79568e+08	6.57258e+08	1.19608e+09	7.20287e+08	8.22435e+08	1.91677e+09	1.35043e+09	1.70292e+09	1.36623e+09	High	High	High	High	High	High	High
FALSE	High	Master Protein	Glyma.12G027400.1.p	K11294 - nucleolin (NCL, NSR1) (1 of 11)	0	173.863	25	19	155	12	12	744	77.5	5.49	484.31	19	0.983	1.861	5.766	1	1	0.96798	40.9	41.6	77.5	240	38.4	121.54	22.86	66.71	1.64597e+09	1.90599e+09	3.27177e+09	1.54239e+09	1.93825e+09	1.4005e+10	4.03138e+09	2.52891e+09	3.60803e+09	1.11766e+10	3.27097e+09	1.7403e+10	High	High	High	High	High	High	High
FALSE	High	Master Protein	Glyma.17G261700.1.p	K03781 - catalase (katE, CAT, catB, srpA) (1 of 4)	0	173.69	41	15	176	1	1	492	56.8	7.27	517.05	15	0.909	0.95	0.01	1	1		127.2	139.9	132.9		9.7	21.02	33.49		4.97167e+06	5.07479e+06	4.22876e+06	5.46861e+06	5.5445e+06	3.71996e+06	5.19286e+06	3.14828e+06	6.4056e+06				Peak Found	Peak Found	Not Found	Peak Found	Peak Found	Not Found	High
FALSE	High	Master Protein	Glyma.11G192700.1.p	PTHR10003:SF34 - SUPEROXIDE DISMUTASE [CU-ZN] 2, CHLOROPLASTIC (1 of 3)	0	173.631	47	6	327	0	5	209	21.6	6.33	1720.48	6	0.918	1.083	6.403	1	1	0.611454	39.1	42.5	46.1	272.3	30.13	112.65	46.34	22.67	6.16255e+08	8.8956e+08	4.9723e+08	6.41955e+08	6.71248e+08	4.32107e+09	7.49623e+08	7.26871e+08	2.7113e+08	4.2977e+09	2.87144e+09	4.47864e+09	High	High	High	High	High	High	High
FALSE	High	Master Protein	Glyma.13G106200.1.p	K03257 - translation initiation factor 4A (EIF4A) (1 of 11)	0	173.561	42	20	165	1	5	413	46.7	5.68	439.85	20	1.916	2.8	2.942	0.126709	0.0152698	0.0219114	88.5	46.2	129.3	135.9	8.72	23.5	8.98	24.65	1.51862e+07	1.30472e+07	1.31633e+07	8.78722e+06	5.48884e+06	6.8689e+06	1.92318e+07	2.15618e+07	1.81028e+07	1.28991e+07	2.02111e+07	2.09191e+07	High	High	High	High	High	Not Found	High
FALSE	High	Master Protein	Glyma.07G226600.1.p		0	173.431	78	11	482	8	8	119	12.2	4.86	1649.64	11	1.112	1.134	3.532	1	1	1	65.6	59	66.9	208.4	101.23	90.98	78.87	54.78	1.09681e+09	1.56304e+09	6.90662e+09	9.43317e+08	1.40529e+09	5.02836e+09	1.19029e+09	1.5937e+09	4.85122e+09	4.96309e+09	2.40159e+09	8.00863e+09	High	High	High	High	High	High	High
FALSE	High	Master Protein	Glyma.17G053800.1.p	PTHR11875//PTHR11875:SF73 - TESTIS-SPECIFIC Y-ENCODED PROTEIN // SUBFAMILY NOT NAMED (1 of 2)	0	172.648	39	12	163	0	3	379	43.5	4.5	547.24	12	1.039	0.583	2.7	1	1	0.525729	78.1	75.2	43.8	202.9	12.03	77.43	61.31	47.34	6.38501e+06	7.28986e+06	5.74014e+06	1.27559e+06	6.14564e+06	1.05466e+07	3.58426e+06	1106454	5.04e+06	1.08004e+07	2.7973e+07	1.65936e+07	Not Found	High	High	Peak Found	Not Found	High	Not Found
FALSE	High	Master Protein	Glyma.18G043600.1.p	PTHR11999//PTHR11999:SF92 - GROUP II PYRIDOXAL-5-PHOSPHATE DECARBOXYLASE // SUBFAMILY NOT NAMED (1 of 4)	0	172.514	44	16	130	3	14	503	57.2	5.82	375.75	16	0.775	0.778	0.915	1	1	1	89.4	115.3	89.7	105.5	21.91	17.59	10.28	11.9	1.2499e+08	8.87308e+07	8.56899e+07	1.28055e+08	1.14422e+08	8.96471e+07	7.96709e+07	8.90018e+07	9.79455e+07	1.04714e+08	1.12302e+08	8.85659e+07	High	High	High	High	High	High	High
FALSE	High	Master Protein	Glyma.02G241100.1.p	PTHR11952//PTHR11952:SF13 - UDP- GLUCOSE PYROPHOSPHORYLASE // SUBFAMILY NOT NAMED (1 of 6)	0	172.393	56	20	147	5	5	451	49.2	5.38	410.39	20	1.338	0.866	0.348	0.7313	1	0.00664441	150.6	112.6	97.5	39.2	11.82	20.73	10.8	15.63	1.84812e+07	1.79771e+07	1.47615e+07	1.34398e+07	1.42541e+07	9.45651e+06	1.16421e+07	1.27127e+07	1.02297e+07	4.68016e+06	5.05528e+06	3.70002e+06	High	High	High	High	High	Not Found	High
FALSE	High	Master Protein	Glyma.07G057200.1.p	K17525 - chitinase domain-containing protein 1 (CHID1) (1 of 4)	0	171.644	42	24	248	7	7	444	46.4	6.23	672.18	24	1.149	1.496	0.847	1	0.796639	1	102.3	89.1	133.2	75.4	12.58	44.37	18.38	52.85	2.47862e+08	2.17188e+08	2.79642e+08	2.15767e+08	2.49172e+08	9.26122e+07	3.22718e+08	2.79774e+08	4.01052e+08	1.82784e+08	2.87166e+08	9.0004e+07	High	High	High	High	High	High	High
FALSE	High	Master Protein	Glyma.13G152500.1.p	K00963 - UTP--glucose-1-phosphate uridylyltransferase (UGP2, galU, galF) (1 of 3)	0	171.625	59	21	133	9	10	475	51.9	5.49	332.46	21	1.142	0.663	0.403	1	0.0352985	0.000527639	142.4	124.7	82.7	50.2	11.65	7.5	9.09	2.64	2.67959e+07	2.54611e+07	2.13151e+07	2.4548e+07	2.22912e+07	2.12154e+07	1.46574e+07	1.71604e+07	1.47781e+07	8.6159e+06	9.05456e+06	8.97803e+06	High	High	High	High	High	Peak Found	High
FALSE	High	Master Protein	Glyma.17G171100.1.p	PTHR10509//PTHR10509:SF23 - O-METHYLTRANSFERASE-RELATED // SUBFAMILY NOT NAMED (1 of 5)	0	171.498	54	10	97	5	10	246	27.6	6.02	339.71	10	1.02	0.808	1.108	1	1	1	103.7	101.6	82.1	112.6	31.96	45	46.89	38.78	1.01823e+08	1.22213e+08	1.855e+08	1.45968e+08	1.19805e+08	5.31788e+07	6.01112e+07	9.67835e+07	1.57379e+08	7.00136e+07	1.32779e+08	1.62517e+08	High	High	High	High	High	Peak Found	High
FALSE	High	Master Protein	Glyma.13G308700.1.p	K01681 - aconitate hydratase (ACO, acnA) (1 of 6)	0	171.335	27	19	119	0	1	984	107	7.56	308.99	19																											Not Found	Not Found	Not Found	Not Found	High	Not Found	Not Found
FALSE	High	Master Protein	Glyma.16G165200.1.p	K08912 - light-harvesting complex II chlorophyll a/b binding protein 1 (LHCB1) (1 of 5)	0	170.787	70	12	498	1	2	264	28	5.41	1595.55	12	0.629	0.772	0.18	1	1	0.935321	97.5	154.9	119.7	27.9	68.48	77.07	65.36	58.61	4.93018e+08	3.19319e+08	8.4896e+07	5.07449e+08	6.27815e+08	5.0446e+07	3.91989e+08	4.22388e+08	7.32835e+07	9.12648e+07	1.26726e+08	3.06598e+07	High	High	High	High	High	High	High
FALSE	High	Master Protein	Glyma.08G304000.1.p	1.1.1.65 - Pyridoxine 4-dehydrogenase / Pyridoxine dehydrogenase (1 of 3)	0	170.557	51	17	153	0	6	368	40.3	6.81	458.52	17	0.875	1.125	0.551	1	1	0.594827	98.5	112.7	126.8	62.1	17.11	1.65	42.72	48.44	3.93811e+07	4.52602e+07	5.51578e+07	5.26672e+07	5.09641e+07	5.17499e+07	3.82131e+07	58220912	9.11009e+07	1.67865e+07	4.61084e+07	2.85029e+07	High	High	High	High	High	Not Found	High
FALSE	High	Master Protein	Glyma.16G165800.1.p	K08912 - light-harvesting complex II chlorophyll a/b binding protein 1 (LHCB1) (1 of 5)	0	170.347	70	12	509	0	2	264	28	5.26	1597.97	12	0.597	0.775	0.224	1	1	1	92	154.1	119.4	34.6	64.87	75.35	65.48	61.92	8.96802e+08	5.3328e+08	1.94401e+08	8.93315e+08	9.59837e+08	8.52775e+07	6.92012e+08	7.81797e+08	1.34077e+08	2.00309e+08	3.16386e+08	7.30271e+07	High	High	Peak Found	High	High	High	High
FALSE	High	Master Protein	Glyma.09G139200.1.p	PF03766 - Remorin, N-terminal region (Remorin_N) (1 of 8)	0	170.122	66	18	205	0	3	206	22.5	5.82	698.42	18	0.749	0.915	1.126	1	1	1	79.1	105.5	96.6	118.8	78.97	41.18	56.08	22.94	1.05532e+08	8.26093e+07	3.29032e+08	9.05752e+07	1.40848e+08	2.11634e+08	1.28904e+08	9.333e+07	2.66259e+08	1.19897e+08	1.58543e+08	1.91735e+08	High	High	High	High	High	High	High
FALSE	High	Master Protein	Glyma.13G112500.1.p	PTHR10772:SF0 - 20 KDA CHAPERONIN, CHLOROPLASTIC (1 of 4)	0	170.088	57	15	165	4	4	251	26.5	8.63	496.26	15	0.94	1.348	2.515	1	1	1	64.8	68.9	92.9	173.3	15.45	90.74	41.83	37.84	3.48715e+07	3.47545e+07	4.50423e+07	3.708e+07	2.79657e+07	1.39266e+08	2.32826e+07	5.84961e+07	4.99946e+07	9.32675e+07	6.23247e+07	1.35448e+08	High	High	High	High	High	High	High
FALSE	High	Master Protein	Glyma.20G167500.1.p	PF02496 - ABA/WDS induced protein (ABA_WDS) (1 of 3)	0	169.92	35	8	138	6	8	238	25.3	5.99	641.8	8	0.702	0.597	2.255	1	0.403988	0.649755	61.7	87.8	52.4	198.1	11.19	60.65	22.23	20.96	1.5009e+08	1.44568e+08	1.77464e+08	1.60588e+08	2.13801e+08	4.84353e+08	1.27538e+08	9.21707e+07	1.453e+08	5.3261e+08	3.48331e+08	4.82155e+08	High	High	High	High	High	High	High
FALSE	High	Master Protein	Glyma.14G064600.2.p	PTHR10795//PTHR10795:SF348 - PROPROTEIN CONVERTASE SUBTILISIN/KEXIN // SUBFAMILY NOT NAMED (1 of 14)	0	169.915	34	17	109	16	16	737	79.3	8.76	350.55	17	0.534	0.364	0.472	0.371099	0.0474926	0.1266	90.1	168.8	61.5	79.6	14.99	12.03	31.23	20.42	8.54801e+07	9.65928e+07	1.1486e+08	1.80897e+08	1.86078e+08	1.48003e+08	1.02036e+08	6.59353e+07	5.78827e+07	8.53219e+07	7.67881e+07	1.12588e+08	High	High	High	High	High	High	High
FALSE	High	Master Protein	Glyma.09G213800.1.p	PTHR10381//PTHR10381:SF24 - ATP-DEPENDENT CLP PROTEASE PROTEOLYTIC SUBUNIT // SUBFAMILY NOT NAMED (1 of 2)	0	169.847	58	13	136	2	2	306	33.3	6.57	384.91	13	0.629	0.288	0.01	1	0.0269735		131.2	208.6	60.2		30.45	17.2	13.93		4.33079e+06	7.20397e+06	4.45788e+06	7.60201e+06	5.39984e+06	7.08587e+06	2.56714e+06	2043855	2.02373e+06				High	Peak Found	Not Found	High	High	Not Found	Peak Found
FALSE	High	Master Protein	Glyma.09G240600.1.p	PTHR11743//PTHR11743:SF31 - VOLTAGE-DEPENDENT ANION-SELECTIVE CHANNEL // SUBFAMILY NOT NAMED (1 of 6)	0	169.687	64	13	170	2	2	276	29.7	8.65	617.07	13	0.833	0.326	1.709	1	1	0.919211	86.1	103.4	33.7	176.7	59.68	52.29	57.96	15.39	3.2799e+07	4.38868e+07	1.00423e+07	3.93733e+07	4.69276e+07	1.36812e+07	7.47714e+06	2.43725e+07	1.28396e+07	6.90371e+07	5.15381e+07	6.72949e+07	High	High	High	High	High	High	High
FALSE	High	Master Protein	Glyma.04G154500.1.p	PF01429 - Methyl-CpG binding domain (MBD) (1 of 21)	0	169.636	57	19	132	8	8	292	32.4	4.89	420.14	19	3.856	2.589	6.011	1	1	0.273863	114.6	29.7	77	178.7	13.6	50.46	84.47	131.77	7.23149e+07	7.76031e+07	9.35158e+07	1.77927e+07	2.01265e+07	4.22189e+07	5.20979e+07	1.37997e+07	1.14352e+08	9.08859e+07	1.20978e+08	1.11528e+09	High	High	High	High	High	High	High
FALSE	High	Master Protein	Glyma.20G058100.1.p	PTHR23308//PTHR23308:SF29 - NUCLEAR INHIBITOR OF PROTEIN PHOSPHATASE-1 // SUBFAMILY NOT NAMED (1 of 1)	0	169.524	53	10	165	4	10	222	24.1	6.15	646.39	10	1.145	1.398	2.998	1	1	0.747532	70	61.1	85.5	183.3	27.13	89.53	18.83	40.17	1.61497e+08	1.77101e+08	2.62475e+08	1.3887e+08	1.54655e+08	6.17428e+08	1.64012e+08	2.16279e+08	2.40133e+08	4.63678e+08	3.52912e+08	7.61498e+08	High	High	High	High	High	High	High
FALSE	High	Master Protein	Glyma.14G223500.1.p	K03781 - catalase (katE, CAT, catB, srpA) (1 of 4)	0	169.194	39	14	164	1	1	492	56.9	7.25	473.44	14	1.094	0.668	0.317	1	1	0.229117	142.1	129.9	86.8	41.2	28.99	31.11	52.2	13.16	3.36941e+06	5.70974e+06	6.06092e+06	3.32708e+06	6.39905e+06	5.22074e+06	4.80064e+06	3.48787e+06	1.44141e+06	1.97591e+06	1.65585e+06	1.53744e+06	High	High	Not Found	High	Peak Found	Not Found	High
FALSE	High	Master Protein	Glyma.14G111800.1.p	K00811 - aspartate aminotransferase, chloroplastic (ASP5) (1 of 2)	0	168.985	56	21	165	0	3	463	50.6	7.9	469.33	21		100	100						128.9	271.1			90.87	48.02							2.07351e+06	1.13793e+06	6.78997e+06	3.14483e+06	7.88769e+06	4.35876e+06	High	High	High	High	Not Found	Not Found	High
FALSE	High	Master Protein	Glyma.10G032100.1.p	K00383 - glutathione reductase (NADPH) (GSR, gor) (1 of 4)	0	168.645	38	15	111	1	1	545	58.5	7.31	313.36	15	1.275	0.672	0.01	1	0.382098		173.1	135.7	91.2		20.69	14.88	22.74		1.69629e+07	1.26172e+07	1.92446e+07	1.16319e+07	1.56366e+07	1.32996e+07	6.71138e+06	10695729	8.93726e+06				High	High	Not Found	High	High	Not Found	High
FALSE	High	Master Protein	Glyma.05G209200.1.p	K01256 - aminopeptidase N (pepN) (1 of 1)	0	168.579	27	24	118	0	7	984	111.2	6.68	298.58	24	0.824	0.614	0.424	1	0.246702	0.0489594	115.1	139.8	85.8	59.3	17.79	19.33	12.36	30.08	3.64915e+07	3.27464e+07	4.60031e+07	4.43019e+07	4.09312e+07	5.83757e+07	2.71833e+07	24463645	3.12472e+07	1.69738e+07	1.87977e+07	2.903e+07	High	High	Peak Found	High	High	Peak Found	High
FALSE	High	Master Protein	Glyma.12G222200.1.p	K00218 - protochlorophyllide reductase (E1.3.1.33, por) (1 of 2)	0	168.384	42	14	128	3	9	399	43.2	8.78	415.08	14	0.798	0.58	0.272	1	0.343587	0.00952495	120.5	151	87.5	41	20.63	18.19	15.29	22.64	1.67702e+08	1.71439e+08	1.15522e+08	2.19981e+08	2.10113e+08	1.54267e+08	1.36505e+08	1.21786e+08	1.00177e+08	4.86448e+07	7.53799e+07	5.70952e+07	High	High	High	High	High	High	High
FALSE	High	Master Protein	Glyma.10G249000.1.p	K02692 - photosystem I subunit II (psaD) (1 of 2)	0	168.16	62	14	620	1	14	210	23	9.61	1768.39	14	0.841	1.103	1.211	1	1	0.899125	81	96.3	106.2	116.6	24.24	7.43	19.7	19.01	3.26728e+09	3.79584e+09	5.18285e+09	3.96476e+09	4.53171e+09	4.51429e+09	4.97707e+09	3.52483e+09	5.16511e+09	5.46658e+09	6.68781e+09	4.57577e+09	High	High	High	High	High	High	High
FALSE	High	Master Protein	Glyma.01G020300.1.p	K01414 - oligopeptidase A [EC:3.4.24.70] (prlC) (1 of 2)	0	168.036	33	21	144	4	4	787	88.4	6.44	393.46	21	0.552	0.344	0.236	0.881034	0.0565425	0.00568638	103.6	187.6	64.5	44.3	27.83	20.5	23.69	10.53	9.8233e+06	5.95498e+06	6.58752e+06	8.4276e+06	1.26376e+07	1.19313e+07	3.99853e+06	4.09982e+06	5.97154e+06	2.93489e+06	2.3919e+06	2.81807e+06	High	High	High	High	High	Not Found	High
FALSE	High	Master Protein	Glyma.08G044100.1.p	K01835 - phosphoglucomutase (pgm) (1 of 4)	0	167.849	48	23	134	4	4	582	63.4	5.53	312.1	23	0.934	0.68	0.041	1	0.843689	2.99187e-05	140.7	150.6	102.5	6.2	11.91	15.78	16.02	19.59	3.04864e+07	2.40789e+07	2.66602e+07	3.10734e+07	2.8545e+07	2.26429e+07	1.92477e+07	2.52456e+07	1.94232e+07	1.17263e+06	1.35541e+06	909027	High	High	High	High	High	Not Found	High
FALSE	High	Master Protein	Glyma.13G105600.1.p	PTHR11875:SF63 - NUCLEOSOME ASSEMBLY PROTEIN 1,4 (1 of 4)	0	167.791	35	12	160	0	3	375	43.2	4.53	537.74	12	1.486	1.002	1.315	1	1	1	123.8	83.3	83.4	109.5	22.35	13.89	87.36	68.72	1.38544e+07	8.97901e+06	1.05599e+07	7.10443e+06	8.49193e+06	6.49666e+06	2.46952e+07	7.11947e+06	5.14522e+06	4.50664e+06	9.34228e+06	1.94565e+07	Peak Found	Peak Found	High	Peak Found	Peak Found	High	Peak Found
FALSE	High	Master Protein	Glyma.14G031800.1.p	PTHR31407:SF6 - OXYGEN-EVOLVING ENHANCER PROTEIN 2-1, CHLOROPLASTIC-RELATED (1 of 4)	0	167.67	51	12	706	0	11	264	28.6	7.87	1801.16	12	0.88	0.959	3.274	1	1	1	57.6	65.4	62.7	214.3	10.31	95.54	14.26	58.88	3.65058e+09	4.43616e+09	3.84139e+09	3.99416e+09	4.36618e+09	1.9598e+10	5.08767e+09	4.18701e+09	3.88506e+09	1.42968e+10	3.88658e+09	1.68973e+10	High	High	High	High	High	High	High
FALSE	High	Master Protein	Glyma.13G349100.1.p	K18121 - glyoxylate/succinic semialdehyde reductase (GLYR) (1 of 3)	0	167.24	52	10	83	10	10	333	35	7.77	346.68	10	1.455	1.494	1.861	1	0.350209	0.0600179	100.2	68.8	102.9	128.1	10.17	23.44	12.94	16.62	1.29456e+08	1.4991e+08	1.58299e+08	1.03012e+08	9.22949e+07	1.42403e+08	1.53944e+08	1.49024e+08	1.87899e+08	1.91709e+08	2.46096e+08	1.82484e+08	High	High	High	High	High	Peak Found	High
FALSE	High	Master Protein	Glyma.12G202500.1.p	K08902 - photosystem II Psb27 protein (psb27) (1 of 2)	0	165.845	38	7	170	2	2	173	19	9.94	642.45	7	0.762	0.391	2.396	1	0.670089	1	67	87.9	34.4	210.7	64.71	98.35	65.57	73.43	3.99605e+07	6.02122e+07	1.20154e+07	5.23196e+07	5.24244e+07	2.58814e+08	1.15096e+07	4.35044e+07	2.04906e+07	3.3202e+08	1.2563e+08	8.44056e+07	High	High	Peak Found	High	High	High	High
FALSE	High	Master Protein	Glyma.16G026200.1.p	K17525 - chitinase domain-containing protein 1 (CHID1) (1 of 4)	0	165.335	38	26	259	9	9	455	47.5	5.58	679.73	26	1.299	1.9	1.327	1	0.490819	0.826895	94.1	72.4	137.5	96	49.09	26.53	40.26	38.37	3.6443e+08	3.95726e+08	8.2995e+08	3.04563e+08	3.33304e+08	1.93992e+08	5.78654e+08	4.09186e+08	9.09883e+08	4.04094e+08	6.91654e+08	3.47376e+08	High	High	High	High	High	High	High
FALSE	High	Master Protein	Glyma.18G182600.1.p	PTHR14194//PTHR14194:SF78 - NITROGEN METABOLIC REGULATION PROTEIN NMR-RELATED // SUBFAMILY NOT NAMED (1 of 2)	0	165.032	78	15	194	0	3	255	27.6	6.04	671.76	15	0.829	0.969	1.289	1	1	1	81.1	97.9	94.8	126.2	15.97	49.63	66.18	16.89	1.17431e+07	1.58866e+07	1.28039e+07	6.3236e+06	1.54469e+07	1.97993e+07	3.16841e+06	1.88093e+07	1.49705e+07	2.41914e+07	1.99138e+07	1.73441e+07	High	High	High	High	High	Peak Found	Peak Found
FALSE	High	Master Protein	Glyma.06G174200.1.p	PTHR18901//PTHR18901:SF9 - 2-DEOXYGLUCOSE-6-PHOSPHATE PHOSPHATASE 2 // SUBFAMILY NOT NAMED (1 of 2)	0	164.461	48	14	197	3	3	335	36.2	6.44	540.74	14	0.922	1.104	0.342	1	1	1	109.5	118.8	131.1	40.6	52.04	64.98	32.69	31.72	8.53837e+07	9.32867e+07	2.77085e+07	9.25768e+07	1.04186e+08	1.83228e+07	1.02225e+08	77399457	1.47736e+08	3.16308e+07	4.60679e+07	2.48382e+07	High	High	Peak Found	High	High	High	High
FALSE	High	Master Protein	Glyma.16G189100.1.p	PTHR11655:SF14 - 54S RIBOSOMAL PROTEIN L6, MITOCHONDRIAL (1 of 2)	0	164.188	63	18	257	3	3	226	24.9	9.99	705.6	18	1.174	1.367	2.501	1	1	0.780359	77.7	66.2	90.5	165.6	33.2	75.13	23.06	9.96	1.47766e+08	1.82411e+08	2.77659e+08	1.40181e+08	1.5542e+08	4.86987e+08	1.76542e+08	2.12469e+08	2.77638e+08	3.88629e+08	3.63104e+08	4.40813e+08	High	High	High	High	High	High	High
FALSE	High	Master Protein	Glyma.05G166300.1.p	PTHR10903:SF39 - TRANSLOCASE OF CHLOROPLAST 159, CHLOROPLASTIC (1 of 3)	0	164.186	24	23	89	17	17	1240	133.3	4.61	258.61	23	2.734	1.417	1.38	0.0299601	0.484483	0.529501	167.5	61.3	86.8	84.5	15.13	12.08	22.94	21.87	1.52142e+08	1.17337e+08	1.56588e+08	5.5638e+07	4.65227e+07	5.90834e+07	6.35678e+07	7.88149e+07	1.00526e+08	6.1105e+07	7.67532e+07	9.5023e+07	High	High	High	High	High	High	High
FALSE	High	Master Protein	Glyma.13G061100.1.p		0	163.274	57	17	135	10	10	388	42.7	4.79	347.82	17	0.818	1.166	6.178	1	1	0.144222	35.7	43.7	50.9	269.7	57.14	88.97	6.94	41.84	4.59535e+07	3.79341e+07	1.0331e+08	2.95665e+07	5.62056e+07	1.74669e+08	6.55235e+07	6.4132e+07	7.28558e+07	3.47227e+08	2.44757e+08	5.59656e+08	High	High	High	High	High	High	High
FALSE	High	Master Protein	Glyma.05G007200.1.p	PTHR22939:SF81 - PROTEASE DO-LIKE 1, CHLOROPLASTIC (1 of 2)	0	162.349	43	15	154	1	2	426	45.2	6.81	508.89	15	0.381	0.551	7.605	0.178675	0.474326	0.0034113	16	41.9	23.1	319	47.3	12.4	15.35	24.81	2.5346e+06	6.0597e+06	3.23787e+06	8.45919e+06	1.04411e+07	8.49998e+06	4.65836e+06	4.6832e+06	6.03291e+06	6.46409e+07	8.88643e+07	5.54131e+07	High	High	Not Found	High	High	Peak Found	High
FALSE	High	Master Protein	Glyma.06G224300.1.p	PF01429 - Methyl-CpG binding domain (MBD) (1 of 21)	0	162.015	54	17	123	11	11	306	33.8	4.92	337.09	17	1.642	0.912	1.973	1	1	0.623552	118.8	72.4	66	142.8	22.61	50.77	50.35	38.58	1.00986e+08	1.00005e+08	1.45751e+08	5.37083e+07	6.15068e+07	1.28824e+08	5.60991e+07	5.34016e+07	1.22013e+08	1.21363e+08	1.18862e+08	2.23346e+08	High	High	High	High	High	High	High
FALSE	High	Master Protein	Glyma.17G230300.1.p	K13210 - far upstream element-binding protein (FUBP) (1 of 4)	0	161.775	32	14	187	6	6	672	69.1	5.88	592.78	14	0.939	1.705	2.043	1	1	1	66.1	70.3	119.9	143.7	76.61	82.46	25.06	13.2	4.7775e+07	2.44815e+07	1.17677e+08	5.08516e+07	2.31665e+07	1.32232e+08	8.67075e+07	6.13417e+07	1.02931e+08	1.0391e+08	8.62549e+07	1.12337e+08	High	High	High	High	High	High	High
FALSE	High	Master Protein	Glyma.14G093200.1.p	K13210 - far upstream element-binding protein (FUBP) (1 of 4)	0	161.601	27	13	168	5	5	670	69.1	5.86	522.17	13	1.329	0.993	1.886	1	1	1	102.1	76.8	76.3	144.9	41.86	51.2	48.45	18.95	4.07847e+07	4.98766e+07	8.77149e+07	3.75172e+07	3.7491e+07	8.47171e+07	3.72571e+07	2.59228e+07	6.65194e+07	7.07753e+07	5.62462e+07	8.26975e+07	High	High	High	High	High	High	High
FALSE	High	Master Protein	Glyma.04G167900.1.p	K08910 - light-harvesting complex I chlorophyll a/b binding protein 4 (LHCA4) (1 of 2)	0	161.549	51	8	77	0	1	252	28	7.42	337.41	8	0.58	0.252	0.114	1	1	0.96798	119.2	205.6	51.8	23.4	83.49	79.96	88.19	74.45	2.71406e+08	2.14734e+08	9.33027e+06	3.7275e+08	3.7033e+08	1.95138e+07	9.32591e+07	199853036	1.78912e+07	5.24387e+07	4.21196e+07	5.29664e+06	High	High	Peak Found	High	High	High	High
FALSE	High	Master Protein	Glyma.01G149700.1.p	PTHR10381//PTHR10381:SF24 - ATP-DEPENDENT CLP PROTEASE PROTEOLYTIC SUBUNIT // SUBFAMILY NOT NAMED (1 of 2)	0	161.316	48	12	137	1	1	306	33.1	6.96	388.12	12																											High	High	Not Found	High	High	Not Found	Not Found
FALSE	High	Master Protein	Glyma.14G195000.1.p	K01953 - asparagine synthase (glutamine-hydrolysing) (asnB, ASNS) (1 of 7)	0	160.833	34	17	129	5	5	581	65.5	6.47	305.11	17	0.834	0.515	0.579	1	0.00584513	0.0146151	113.9	136.7	70.3	79.1	14.17	7.37	7.24	10.01	2.69585e+07	2.61532e+07	3.36189e+07	3.60123e+07	3.23387e+07	3.13681e+07	1.66389e+07	1.57518e+07	1.81631e+07	1.87204e+07	1.81734e+07	2.18051e+07	High	High	Peak Found	High	High	Peak Found	High
FALSE	High	Master Protein	Glyma.07G059800.1.p	K18121 - glyoxylate/succinic semialdehyde reductase (GLYR) (1 of 3)	0	160.562	45	11	87	3	3	290	30.8	6.8	273.15	11	1.118	0.57	1.16	1	1	1	116.3	103.9	59.3	120.5	16.48	19.05	64.94	45.71	3.41119e+07	3.63626e+07	4.61604e+07	3.25103e+07	3.69992e+07	2.51011e+07	1.85337e+07	1.82222e+07	5.14487e+07	3.76981e+07	5.36753e+07	1.98136e+07	High	High	High	High	High	Peak Found	High
FALSE	High	Master Protein	Glyma.15G209000.1.p	PTHR11545:SF7 - 50S RIBOSOMAL PROTEIN L13, CHLOROPLASTIC (1 of 1)	0	160.083	39	9	72	9	9	243	27.1	10.2	290.21	9	0.808	0.659	0.455	1	1	0.324804	110.6	136.9	90.2	62.3	34.68	22.82	24.35	11.72	1.4324e+08	2.06007e+08	1.02371e+08	1.78204e+08	1.77185e+08	1.15637e+08	1.16799e+08	1.56044e+08	9.70637e+07	9.74916e+07	8.06627e+07	7.94999e+07	High	High	Peak Found	High	High	High	High
FALSE	High	Master Protein	Glyma.07G075100.1.p	PF11623 - Protein of unknown function (DUF3252) (DUF3252) (1 of 2)	0	159.819	51	10	155	9	10	243	26.6	9.01	510.09	10	0.968	1.101	2.536	1	1	0.996114	69.1	71.4	78.6	181	74.25	79.1	63.05	13.8	1.94393e+08	2.04041e+08	6.47494e+08	1.78968e+08	2.10848e+08	6.8494e+08	2.32246e+08	2.08535e+08	5.97956e+08	5.21131e+08	5.34746e+08	6.64509e+08	High	High	High	High	High	High	High
FALSE	High	Master Protein	Glyma.15G052300.1.p	PTHR12320:SF9 - PROTEIN PHOSPHATASE 2C 62-RELATED (1 of 1)	0	159.752	32	17	112	0	17	778	83.6	4.35	398.63	17	4.708	2.822	3.966	0.503438	0.751212	0.403815	150.7	32	90.3	126.9	58.15	57.26	70.17	16.77	1.8154e+08	1e+08	3.35506e+08	3.5326e+07	3.8557e+07	9.15587e+07	1.08819e+08	6.5298e+07	2.58042e+08	1.37486e+08	1.89708e+08	1.52904e+08	High	High	High	High	High	High	High
FALSE	High	Master Protein	Glyma.15G253000.1.p	PTHR23115:SF138 - TRANSLATION INITIATION FACTOR IF-2, CHLOROPLASTIC (1 of 2)	0	159.569	33	26	125	4	4	1015	108.3	8.27	284.56	26	100						400				17.71				1.06153e+07	1.48724e+07	1.45156e+07										High	Not Found	High	High	High	Not Found	Not Found
FALSE	High	Master Protein	Glyma.07G114600.1.p	K13199 - plasminogen activator inhibitor 1 RNA-binding protein (SERBP1) (1 of 5)	0	158.962	41	13	143	4	4	368	39.3	6.19	449.26	13	0.758	0.519	0.689	1	0.235041	0.74858	102.2	134.9	70	93	19.03	28.41	20.84	24	6.27187e+07	7.47444e+07	9.16546e+07	8.31812e+07	9.86473e+07	1.42373e+08	7.12353e+07	4.98821e+07	5.11807e+07	6.79841e+07	6.30266e+07	9.67797e+07	High	High	High	High	High	High	High
FALSE	High	Master Protein	Glyma.13G267900.1.p	3.4.19.9 - Gamma-glutamyl hydrolase / Pteroyl-poly-alpha-glutamate hydrolase (1 of 3)	0	158.909	57	11	233	11	11	175	19.9	8.88	803.74	11	1.213	0.883	0.556	1	1	1	132.8	109.5	96.7	60.9	21.28	56.21	24.24	49.28	2.12242e+09	2.5635e+09	1.66271e+09	1.75624e+09	1.74998e+09	4.64478e+08	1.1001e+09	1.81318e+09	1.54545e+09	9.72632e+08	1.52791e+09	5.33358e+08	High	High	High	High	High	High	High
FALSE	High	Master Protein	Glyma.09G138400.1.p	PTHR11655:SF14 - 54S RIBOSOMAL PROTEIN L6, MITOCHONDRIAL (1 of 2)	0	158.86	63	18	245	3	3	226	25	9.96	702.21	18	1.364	1.291	1.714	1	1	0.427911	101.6	74.5	96.2	127.7	18.31	31.03	15.23	28.01	6.52638e+07	9.27736e+07	8.99395e+07	6.4001e+07	6.59326e+07	1.07467e+08	6.67309e+07	85123909	9.00251e+07	1.02611e+08	1.69432e+08	1.13031e+08	High	High	High	High	High	High	High
FALSE	High	Master Protein	Glyma.19G228100.1.p	PTHR13833:SF49 - NHL REPEAT-CONTAINING PROTEIN 2 (1 of 2)	0	158.281	25	22	128	19	22	1067	116.5	5.77	313.1	22	1.006	0.841	1.489	1	1	0.82891	92.8	92.3	77.5	137.4	37.13	24.07	28.49	3.11	1.26651e+08	1.19419e+08	2.23503e+08	1.11746e+08	1.25901e+08	1.74814e+08	1.05823e+08	9.55994e+07	1.59387e+08	1.87523e+08	1.87528e+08	1.978e+08	High	High	High	High	High	High	High
FALSE	High	Master Protein	Glyma.07G114900.2.p	K02926 - large subunit ribosomal protein L4 (RP-L4, MRPL4, rplD) (1 of 6)	0	157.824	42	13	264	2	2	303	33.2	8.06	715.82	13	0.946	1.085	1.67	1	1	0.797224	80.5	85.1	92.3	142.1	19.6	35.1	36.51	33.89	2.64191e+07	3.91698e+07	3.59761e+07	3.80348e+07	2.7842e+07	5.60079e+07	2.67916e+07	4.12617e+07	5.72899e+07	8.79577e+07	6.35221e+07	4.39027e+07	High	High	High	High	High	High	High
FALSE	High	Master Protein	Glyma.12G182800.1.p	PTHR21141:SF48 - 60S ACIDIC RIBOSOMAL PROTEIN P2-4 (1 of 2)	0	157.685	99	8	126	4	4	111	11.2	4.37	658.94	8	4.543	0.929	1.277	0.195839	1	1	234.5	51.6	47.9	65.9	4.05	25.64	79.5	61.87	3.94455e+08	3.81386e+08	3.63821e+08	8.39567e+07	5.53725e+07	9.36827e+07	6.6427e+07	7.79596e+07	2.55443e+08	7.04908e+07	2.31569e+08	1.07242e+08	High	High	High	High	High	High	High
FALSE	High	Master Protein	Glyma.18G115500.1.p	1.1.1.65 - Pyridoxine 4-dehydrogenase / Pyridoxine dehydrogenase (1 of 3)	0	157.498	50	17	153	6	6	368	40.3	6.81	445.73	17	1.044	0.869	0.756	1	1	1	113.8	109	94.8	82.4	36.38	3.04	65.84	63.59	6.5693e+07	7.04522e+07	1.22166e+08	6.74632e+07	6.9614e+07	6.55061e+07	5.86554e+07	4.73277e+07	1.49671e+08	5.10271e+07	1.11003e+08	3.21748e+07	High	High	High	High	High	High	High
FALSE	High	Master Protein	Glyma.08G254500.1.p	K00033 - 6-phosphogluconate dehydrogenase (PGD, gnd, gntZ) (1 of 4)	0	157.284	45	17	122	2	8	486	53.5	6.48	285.14	17	1.047	0.872	0.444	1	1	0.0659115	124.5	118.9	103.7	52.8	22.04	12.38	27.76	17.59	2.5124e+07	1.81065e+07	2.84103e+07	2.23217e+07	2.40034e+07	2.82934e+07	1.52623e+07	2.6946e+07	2.09358e+07	9.83112e+06	1.06552e+07	1.36331e+07	High	High	Peak Found	High	High	Not Found	High
FALSE	High	Master Protein	Glyma.15G003200.1.p	PTHR31096:SF16 - ACT DOMAIN-CONTAINING PROTEIN (1 of 4)	0	157.233	50	12	222	0	6	301	33	5.26	687.92	12	0.865	3.004	3.732	1	1	0.874702	40.2	46.5	139.7	173.6	56.58	53.99	92.76	33.99	2.25372e+07	3.79936e+07	7.11441e+07	9.56607e+07	4.39439e+07	3.75229e+07	1.32005e+08	2.67957e+07	3.17842e+08	9.73017e+07	2.00455e+08	1.64013e+08	High	High	High	High	High	High	Peak Found
FALSE	High	Master Protein	Glyma.09G131500.1.p	PTHR11528//PTHR11528:SF47 - HEAT SHOCK PROTEIN 90 // SUBFAMILY NOT NAMED (1 of 3)	0	157.038	28	22	144	1	9	699	80.3	5.06	386.77	22	0.949	1.031	5.166	1	1	0.776411	46.6	49.1	50.6	253.7	81	95.48	109.71	27.93	4.10083e+07	4.44407e+07	1.55256e+08	4.68128e+07	4.65178e+07	2.18652e+08	2.70898e+07	4.82427e+07	2.30558e+08	2.41854e+08	2.07254e+08	3.49841e+08	High	High	High	High	High	Peak Found	High
FALSE	High	Master Protein	Glyma.18G041700.1.p	K03934 - NADH dehydrogenase (ubiquinone) Fe-S protein 1 (NDUFS1) (1 of 2)	0	156.824	37	18	81	6	6	746	81.2	6.62	228.57	18	1.176	4.148	3.273	1	0.242911	0.328464	49	41.7	172.9	136.4	88.98	23.89	18.02	21.75	1.31897e+07	1.62952e+07	6.13038e+07	1.3668e+07	2.03676e+07	1.38601e+07	4.38229e+07	6.29839e+07	5.74932e+07	3.62517e+07	5.62134e+07	4.53586e+07	High	High	Peak Found	High	High	Not Found	High
FALSE	High	Master Protein	Glyma.12G024700.1.p	PTHR11071:SF252 - PEPTIDYL-PROLYL CIS-TRANS ISOMERASE CYP18-3-RELATED (1 of 4)	0	156.782	39	7	295	4	4	172	18.1	7.83	925.71	7	1.167	0.896	1.695	1	1	1	98.1	84	75.3	142.5	35.37	30.39	59.28	10.37	4.00123e+08	5.73841e+08	8.21281e+08	4.42341e+08	4.91515e+08	7.61332e+08	1.77664e+08	4.40564e+08	6.97724e+08	8.78357e+08	7.15847e+08	8.33253e+08	High	High	High	High	High	High	High
FALSE	High	Master Protein	Glyma.08G135000.1.p	K02904 - large subunit ribosomal protein L29 (RP-L29, rpmC) (1 of 2)	0	156.577	40	14	156	6	6	161	18.4	10.37	521.1	14	1.036	1.194	2.041	1	1	0.81718	78.6	75.9	90.6	154.9	32.55	80.58	0.95	38.74	8.52344e+07	1.08119e+08	1.60065e+08	7.46577e+07	1.0438e+08	3.20488e+08	1.26601e+08	1.24602e+08	1.24475e+08	2.13074e+08	2.02967e+08	3.8752e+08	High	High	High	High	High	High	High
FALSE	High	Master Protein	Glyma.16G028700.1.p	K18121 - glyoxylate/succinic semialdehyde reductase (GLYR) (1 of 3)	0	156.325	50	12	77	4	4	290	30.7	7.18	248.07	12	0.946	0.828	0.808	1	1	1	105.7	111.7	92.4	90.2	14.75	22.75	20.38	32.69	1.84844e+07	1.98801e+07	2.43879e+07	2.10105e+07	2.1409e+07	1.38302e+07	1.73872e+07	1.62242e+07	2.34436e+07	9.05289e+06	1.75535e+07	1.69675e+07	High	High	High	High	High	Peak Found	High
FALSE	High	Master Protein	Glyma.17G130100.1.p	K02113 - F-type H+-transporting ATPase subunit delta (ATPF1D, atpH) (1 of 2)	0	155.812	54	12	293	4	4	253	27.4	6.4	898.9	12	2.385	1.924	0.905	0.828735	0.54313	1	153.5	64.4	123.8	58.3	40.22	61.32	17.27	51.74	1.36276e+08	3.17492e+08	3.08969e+08	1.35762e+08	1.29573e+08	2.87053e+07	2.49249e+08	2.04198e+08	2.89735e+08	1.02594e+08	2.49602e+08	1.17268e+08	High	High	High	High	High	High	High
FALSE	High	Master Protein	Glyma.18G002800.1.p	K17285 - selenium-binding protein 1 (SELENBP1) (1 of 4)	0	155.633	50	20	84	6	6	484	53.4	6.09	221.09	20	1.041	1.321	1.037	1	1	1	94.6	90.9	120.1	94.3	11.38	3.93	27.87	58.57	3.55208e+07	3.17289e+07	2.82742e+07	2.94995e+07	3.18942e+07	3.04886e+07	2.51353e+07	40264600	4.45979e+07	3.16213e+07	1.77823e+07	5.95361e+07	High	High	Peak Found	High	High	Peak Found	High
FALSE	High	Master Protein	Glyma.06G225800.1.p	PTHR33449:SF1 - NUCLEOID-ASSOCIATED PROTEIN YBAB (1 of 2)	0	155.209	44	9	200	1	1	195	21.1	8.51	649.94	9	1.124	1.02	2.255	1	1	0.933871	83.3	74.1	75.6	167	81.12	54.3	88.36	36.96	3.93516e+07	5.51343e+07	1.70672e+08	3.63681e+07	4.90607e+07	9.97011e+07	4.33204e+07	5.00651e+07	1.92323e+08	9.36165e+07	1.8354e+08	1.1062e+08	High	High	High	High	High	High	High
FALSE	High	Master Protein	Glyma.15G052400.2.p	K08917 - light-harvesting complex II chlorophyll a/b binding protein 6 (LHCB6) (1 of 3)	0	155.117	47	10	230	2	2	260	27.6	6.6	710.36	10	0.526	0.618	0.107	1	1	1	93.4	177.7	109.9	19.1	77.56	82.13	60.57	104.27	1.06558e+09	6.36298e+08	1.23174e+08	1.41347e+09	1.21058e+09	5.42761e+07	7.48649e+08	8.28669e+08	1.78534e+08	1.30124e+08	4.7545e+08	4.7536e+07	High	High	High	High	High	High	High
FALSE	High	Master Protein	Glyma.06G224700.1.p	PF01429 - Methyl-CpG binding domain (MBD) (1 of 21)	0	155.098	56	14	96	10	10	306	34.2	4.91	261.54	14	1.047	0.37	1.935	1	0.733323	0.625893	96.3	91.9	34	177.8	20.95	8.71	67.13	34.98	9.77787e+07	7.29128e+07	1.11888e+08	7.99487e+07	9.33491e+07	9.33847e+07	3.10382e+07	3.45576e+07	9.49508e+07	1.806e+08	1.14513e+08	2.39006e+08	High	High	High	High	High	High	High
FALSE	High	Master Protein	Glyma.18G049400.1.p	PF10674 - Protein of unknown function (DUF2488) (Ycf54) (1 of 2)	0	154.813	56	11	160	3	5	234	26.7	6.42	568.01	11	0.886	1.485	1.274	1	1	1	76.3	86.1	127.9	109.7	36.46	58.31	28	21.12	3.37383e+07	4.70918e+07	6.99737e+07	5.09759e+07	5.31578e+07	1.31304e+08	7.89187e+07	4.83927e+07	8.57346e+07	9.48214e+07	6.62104e+07	6.77119e+07	High	High	High	High	High	High	High
FALSE	High	Master Protein	Glyma.17G050600.1.p	PF07876 - Stress responsive A/B Barrel Domain (Dabb) (1 of 18)	0	154.59	63	11	120	11	11	253	27.6	6.87	462.11	11	1.264	1.696	1.329	1	1	0.981449	95.6	75.6	128.3	100.5	12.06	21.29	34.51	42.08	2.83135e+08	3.57902e+08	3.42814e+08	2.7118e+08	2.61086e+08	3.77661e+08	2.95998e+08	4.60046e+08	6.10233e+08	6.55311e+08	3.60524e+08	3.1107e+08	High	High	High	High	High	High	High
FALSE	High	Master Protein	Glyma.15G171800.2.p	PTHR24031//PTHR24031:SF322 - RNA HELICASE // SUBFAMILY NOT NAMED (1 of 2)	0	154.495	35	16	154	1	1	413	46.9	5.68	410.71	16	0.873	0.712	0.833	1	1	1	102.2	117	83.4	97.5	17.59	42.96	96.52	42.38	3.28762e+06	2.30112e+06	2.92993e+06	3.80042e+06	3.35617e+06	1.47297e+06	2.39115e+06	914377	7.58588e+06	1.1669e+06	2.88694e+06	2.79503e+06	Peak Found	Peak Found	Not Found	High	Peak Found	Peak Found	Peak Found
FALSE	High	Master Protein	Glyma.13G125400.1.p	K01900 - succinyl-CoA synthetase beta subunit (LSC2) (1 of 2)	0	154.159	42	16	142	4	4	422	45.3	6.16	415.33	16	1.015	0.862	0.677	1	1	0.933871	114.2	112.5	97	76.2	30.71	7.51	31.59	60.23	7.47052e+07	8.01003e+07	4.26989e+07	7.36031e+07	7.359e+07	8.36081e+07	8.53148e+07	6.34643e+07	4.46229e+07	8.70197e+07	2.30822e+07	4.98423e+07	High	High	High	High	High	High	High
FALSE	High	Master Protein	Glyma.08G233500.1.p	PTHR31810:SF6 - METACASPASE-4-RELATED (1 of 4)	0	153.938	45	17	108	5	5	415	45	5.02	312.53	17	0.216	0.309	0.6	1	1	1	40.6	188.3	58.1	113	129.82	13.07	122.54	104.71	1.06577e+07	1.20445e+07	1.13234e+08	6.44371e+07	4.96989e+07	5.58418e+07	1.72362e+07	1.17815e+07	1.19431e+08	3.35278e+07	1.6458e+08	2.55572e+07	High	High	High	High	High	High	Peak Found
FALSE	High	Master Protein	Glyma.13G183200.1.p	1.10.3.1 - Catechol oxidase / Tyrosinase (1 of 15)	0	153.76	39	19	106	16	18	605	68.2	7.77	287.41	19	0.992	0.763	0.822	1	0.740946	0.761289	110.9	111.8	85.3	91.9	21.63	21.53	9.22	20.96	9.00175e+07	1.20372e+08	1.40193e+08	1.06784e+08	1.21334e+08	1.60734e+08	1.00838e+08	8.38026e+07	9.26076e+07	7.51211e+07	9.97038e+07	1.15343e+08	High	High	High	High	High	High	High
FALSE	High	Master Protein	Glyma.11G030700.1.p	PF00805 - Pentapeptide repeats (8 copies) (Pentapeptide) (1 of 6)	0	153.07	51	11	157	4	11	266	28.3	7.39	568.8	11	1.252	1.2	2.54	1	1	0.971746	83.6	66.8	80.1	169.5	37	79.83	62.13	26.79	2.06726e+08	2.80809e+08	4.28672e+08	2.24244e+08	2.13688e+08	7.80377e+08	2.31321e+08	2.68998e+08	6.67908e+08	5.69486e+08	4.89333e+08	8.09946e+08	High	High	High	High	High	High	High
FALSE	High	Master Protein	Glyma.09G270500.2.p	5.4.2.11//5.4.2.12 - Phosphoglycerate mutase (2,3-diphosphoglycerate-dependent) / Phosphoglyceromutase // Phosphoglycerate mutase (2,3-diphosphoglycerate-independent) / Phosphoglyceromutase (1 of 2)	0	153.038	40	17	112	2	2	559	60.8	5.78	341.05	17	1.053	2.841	1.477	1	0.0618989	0.796336	66.1	62.8	178.4	92.8	2.89	0.84	47.37	28.56	3.81204e+06	3.79083e+06	3.99374e+06	3.62161e+06	3.6505e+06	3.58957e+06	1.02901e+07	6.82864e+06	1.75554e+07	7.2232e+06	5.3503e+06	4.07292e+06	High	Peak Found	Not Found	Peak Found	Peak Found	Not Found	High
FALSE	High	Master Protein	Glyma.11G114000.2.p	K01527 - nascent polypeptide-associated complex subunit beta (EGD1, BTF3) (1 of 4)	0	152.929	70	11	145	1	1	162	17.7	7.4	632.06	11	0.01	0.01	0.388			0.180274		288.3		111.7		35.07		7.82				4.31052e+07	2.22947e+07	4.64016e+07				1.82721e+07	1.67046e+07	1.56483e+07	Not Found	Not Found	High	Not Found	High	High	Not Found
FALSE	High	Master Protein	Glyma.11G113900.1.p	K01527 - nascent polypeptide-associated complex subunit beta (EGD1, BTF3) (1 of 4)	0	152.473	70	11	144	1	1	162	17.7	7.4	632.94	11	0.01	0.01	0.487			0.0475821		268.9		131.1		13.53		16.68				4.34307e+07	5.62688e+07	4.70471e+07				2.94502e+07	2.29271e+07	2.18138e+07	Not Found	Not Found	Not Found	Not Found	Not Found	High	High
FALSE	High	Master Protein	Glyma.12G039900.1.p	K01527 - nascent polypeptide-associated complex subunit beta (EGD1, BTF3) (1 of 4)	0	152.396	70	11	143	1	1	161	17.5	8.32	627.02	11	0.01	0.01	0.524			0.067107		262.4		137.6		14.34		12.51				7.33166e+07	7.9033e+07	5.93557e+07				3.77637e+07	4.69804e+07	3.8444e+07	Not Found	Not Found	Not Found	Not Found	Not Found	High	Not Found
FALSE	High	Master Protein	Glyma.11G214800.1.p	K03934 - NADH dehydrogenase (ubiquinone) Fe-S protein 1 (NDUFS1) (1 of 2)	0	152.19	38	20	88	1	8	747	81.3	6.7	214.75	20	0.74	0.921	0.547	0.109548	0.843689	0.00477929	92.2	124.7	114.8	68.2	9.52	1.84	13.19	3.98	2.28215e+07	2.14221e+07	1.88712e+07	2.86336e+07	2.96771e+07	2.89579e+07	2.66718e+07	2.18111e+07	2.83002e+07	1.58088e+07	1.69437e+07	1.58461e+07	High	High	Peak Found	High	High	Not Found	High
FALSE	High	Master Protein	Glyma.07G028900.1.p	3.8.1.5 - Haloalkane dehalogenase / 1-chlorohexane halidohydrolase (1 of 5)	0	152.113	46	12	84	0	3	374	41.5	8.79	278.55	12	1.062	0.401	0.724	1	0.0989948	0.754496	133.3	125.5	50.4	90.9	4.88	17.2	32.27	43.82	1.45197e+07	1.55426e+07	1.41535e+07	1.35571e+07	1.81145e+07	1.36685e+07	3.70448e+06	5.48699e+06	7.23948e+06	1.47664e+07	9.89829e+06	5.86222e+06	High	High	Not Found	High	High	Peak Found	High
FALSE	High	Master Protein	Glyma.20G116100.1.p	PTHR12934:SF11 - 50S RIBOSOMAL PROTEIN L15, CHLOROPLASTIC (1 of 2)	0	151.684	53	16	247	3	16	256	27.6	10.99	655.77	16	1.166	1.07	1.955	1	1	0.982851	89.8	77.1	82.5	150.6	24.16	76.77	13.93	52.11	5.20648e+08	7.86686e+08	8.46449e+08	6.7496e+08	5.27555e+08	2.02683e+09	8.39556e+08	7.2236e+08	6.36257e+08	1.31945e+09	1.00902e+09	2.63212e+09	High	High	High	High	High	High	High
FALSE	High	Master Protein	Glyma.08G213900.1.p	3.8.1.5 - Haloalkane dehalogenase / 1-chlorohexane halidohydrolase (1 of 5)	0	151.548	51	13	78	4	4	376	41.8	9.13	261.74	13	0.987	0.414	0.351	1	0.301766	0.100232	143.5	145.3	60.1	51.1	15.67	8.46	23.86	52.3	8.02733e+06	1.07817e+07	1.05772e+07	9.43743e+06	1.07113e+07	1.11324e+07	4.43094e+06	3.82676e+06	6.02608e+06	2.05225e+06	6.22954e+06	3.763e+06	High	High	Peak Found	High	High	Peak Found	Peak Found
FALSE	High	Master Protein	Glyma.13G135500.1.p	PTHR11260//PTHR11260:SF222 - GLUTATHIONE S-TRANSFERASE, GST, SUPERFAMILY, GST DOMAIN CONTAINING // SUBFAMILY NOT NAMED (1 of 7)	0	151.315	60	15	124	4	4	237	27	5.35	374.46	15	1.409	0.995	0.974	1	1	1	128.7	91.3	90.9	89	22.54	32.45	48.37	3.74	4.9246e+07	6.51361e+07	7.81316e+07	4.62129e+07	5.03528e+07	2.56629e+07	2.02834e+07	60758058	4.59934e+07	4.50288e+07	4.74373e+07	4.41458e+07	High	High	High	High	High	Peak Found	High
FALSE	High	Master Protein	Glyma.11G255300.1.p	PTHR34209:SF1 - RHODANESE/CELL CYCLE CONTROL PHOSPHATASE SUPERFAMILY PROTEIN (1 of 2)	0	151.314	37	21	103	0	8	643	69.3	5.07	282.88	21	1.082	0.713	0.74	1	1	0.933299	122.4	113.2	80.7	83.7	45.33	3.29	42.99	22.73	3.14039e+07	2.58559e+07	5.85536e+07	2.97244e+07	2.90291e+07	2.7848e+07	1.89666e+07	20695899	3.93997e+07	1.48142e+07	2.14828e+07	2.345e+07	High	High	High	High	High	High	High
FALSE	High	Master Protein	Glyma.02G305400.1.p	K08913 - light-harvesting complex II chlorophyll a/b binding protein 2 (LHCB2) (1 of 2)	0	150.897	65	10	503	0	5	265	28.6	5.66	1306.63	10	0.655	0.753	0.156	1	1	1	102.2	156	117.4	24.4	83.86	81.17	72.62	45.82	5.00592e+09	2.96709e+09	3.59256e+08	4.53219e+09	5.91403e+09	3.21077e+08	3.41058e+09	4.11299e+09	4.67074e+08	7.15399e+08	7.08589e+08	2.65187e+08	High	High	High	High	High	High	High
FALSE	High	Master Protein	Glyma.11G215500.1.p	PTHR20852//PTHR20852:SF59 - GLUTAMINE SYNTHETASE // SUBFAMILY NOT NAMED (1 of 4)	0	150.554	53	12	103	3	10	356	39	5.73	316.83	12	1.288	1.183	0.803	0.816779	1	0.795208	120.5	93.6	110.8	75.1	15.38	7.24	8.06	23.15	1.07338e+08	1.15769e+08	1.43254e+08	9.78045e+07	8.98937e+07	8.47511e+07	9.75133e+07	1.06384e+08	1.14621e+08	5.85694e+07	7.21706e+07	9.28255e+07	High	High	High	High	High	High	High
FALSE	High	Master Protein	Glyma.18G001800.3.p	PTHR34209:SF1 - RHODANESE/CELL CYCLE CONTROL PHOSPHATASE SUPERFAMILY PROTEIN (1 of 2)	0	149.814	37	21	99	0	8	650	70.4	5.25	264.08	21	0.499	0.47	1.467	1	1	1	58.1	116.4	54.7	170.7	26.32	14.61	97.1	41.02	2.70232e+07	1.59677e+07	2.04191e+07	3.66436e+07	4.08932e+07	4.87648e+07	1.92333e+07	1.53214e+07	8.32072e+07	2.6871e+07	6.52116e+07	5.9988e+07	High	High	High	High	High	Peak Found	High
FALSE	High	Master Protein	Glyma.20G149400.1.p	K02984 - small subunit ribosomal protein S3Ae (RP-S3Ae, RPS3A) (1 of 5)	0	149.701	48	14	121	0	0	261	29.7	9.8	348.84	14																											Not Found	Not Found	Not Found	Not Found	Not Found	Not Found	Not Found
FALSE	High	Master Protein	Glyma.11G209100.1.p	PTHR22912:SF144 - MONODEHYDROASCORBATE REDUCTASE, CYTOPLASMIC ISOFORM 1-RELATED (1 of 2)	0	149.665	50	16	144	4	4	433	47	5.62	448.98	16	0.913	0.791	0.385	1	1	0.396492	118.2	129.5	102.4	49.9	21.3	44.01	44.79	8.22	7.51469e+07	6.11226e+07	4.88774e+07	9.19513e+07	6.6964e+07	3.5153e+07	5.4865e+07	5.29838e+07	2.07152e+07	2.39892e+07	2.57973e+07	2.82505e+07	High	High	High	High	High	Peak Found	High
FALSE	High	Master Protein	Glyma.10G245200.1.p	K02984 - small subunit ribosomal protein S3Ae (RP-S3Ae, RPS3A) (1 of 5)	0	149.412	48	14	113	0	1	261	29.7	9.8	333.64	14	1.286	1.064	0.739	1	1	1	125.8	97.8	104.1	72.3	61.04	24.25	29.06	45.86	2.55384e+07	2.27933e+07	5.38516e+06	1.77307e+07	1.9374e+07	1.18482e+07	1.88688e+07	25404010	1.41374e+07	7.36752e+06	1.96147e+07	1.31056e+07	Peak Found	High	High	Not Found	Peak Found	Peak Found	Peak Found
FALSE	High	Master Protein	Glyma.20G207100.1.p	PF04755 - PAP_fibrillin (PAP_fibrillin) (1 of 23)	0	149.38	61	12	130	6	12	265	28.4	8.15	395.22	12	1.015	0.802	0.338	1	1	0.827736	128.7	126.8	101.7	42.8	33.69	18.9	19.09	94.35	4.7751e+08	5.59659e+08	2.73721e+08	5.20556e+08	4.70464e+08	3.55189e+08	3.77404e+08	4.76184e+08	3.2851e+08	1.07099e+08	6.05701e+08	1.58898e+08	High	High	High	High	High	High	High
FALSE	High	Master Protein	Glyma.19G025400.1.p	PTHR33971:SF1 - GENOMIC DNA, CHROMOSOME 3, P1 CLONE:MRI12 (1 of 1)	0	149.184	59	20	82	13	13	363	40.5	4.74	231.02	20	3.854	2.346	9.117	0.847003	1	0.0717924	94.5	24.5	57.5	223.5	12.91	96.15	11.63	39.79	3.68179e+07	4.28508e+07	4.7767e+07	8.12699e+06	1.11174e+07	4.54319e+07	2.60858e+07	2.37587e+07	2.98808e+07	6.80116e+07	1.01358e+08	1.5283e+08	High	High	High	High	High	High	High
FALSE	High	Master Protein	Glyma.04G200900.1.p	K01191 - alpha-mannosidase (E3.2.1.24) (1 of 7)	0	148.673	26	21	116	8	8	1011	114.2	6.7	263.88	21	1.326	1.45	1.007	1	1	1	110.9	83.6	121.2	84.2	22.4	36.69	16.88	21.55	2.49529e+07	3.87832e+07	2.99983e+07	1.60299e+07	2.26201e+07	3.35019e+07	3.54163e+07	2.52798e+07	3.279e+07	2.37851e+07	2.27844e+07	1.55988e+07	High	High	High	High	High	Peak Found	High
FALSE	High	Master Protein	Glyma.08G118400.1.p	PTHR13194:SF19 - NAD(P)-BINDING ROSSMANN-FOLD SUPERFAMILY PROTEIN (1 of 2)	0	148.527	39	20	113	1	7	600	65.9	8.35	311.23	20	1.336	0.793	0.228	0.931944	0.282597	0.000137613	159.2	119.1	94.5	27.2	5.37	13.99	11.27	11.38	3.99684e+07	3.67029e+07	4.06178e+07	3.74995e+07	2.94561e+07	2.99101e+07	2.37198e+07	2.73231e+07	2.19418e+07	6.81789e+06	7.4172e+06	5.90098e+06	High	High	Peak Found	High	High	Peak Found	High
FALSE	High	Master Protein	Glyma.19G181300.1.p	PTHR19139:SF167 - AQUAPORIN PIP2-1-RELATED (1 of 8)	0	148.328	39	8	78	0	5	285	30.5	9.09	263.74	8	0.921	0.715	0.953	1	0.935006	0.924712	102.7	111.4	79.7	106.2	8.98	47.89	29.93	59.05	1.06082e+08	1.04532e+08	8.97878e+07	1.00439e+08	1.13474e+08	2.28863e+08	8.45025e+07	8.11465e+07	4.63153e+07	1.08133e+08	2.96812e+07	1.29795e+08	High	High	Peak Found	High	High	High	High
FALSE	High	Master Protein	Glyma.11G107200.1.p	PTHR31356:SF9 - L-ASCORBATE PEROXIDASE 3, PEROXISOMAL (1 of 2)	0	147.841	37	13	109	1	1	287	31.7	7.11	365.71	13																											High	Not Found	Not Found	Not Found	Not Found	Not Found	Not Found
FALSE	High	Master Protein	Glyma.08G173700.1.p	K03541 - photosystem II 10kDa protein (psbR) (1 of 2)	0	147.814	35	8	239	1	8	139	14.3	9.7	703.11	8	0.879	0.904	0.327	1	1	0.833249	113.1	128.6	116.3	42	24.53	64.11	22.38	59.26	3.11326e+09	2.71682e+09	1.87879e+09	3.09073e+09	3.92355e+09	7.32122e+08	2.79478e+09	3.70983e+09	2.41565e+09	1.00913e+09	1.69134e+09	4.4904e+08	High	High	High	High	High	High	High
FALSE	High	Master Protein	Glyma.04G142800.1.p	PTHR35742:SF1 - THYLAKOID LUMENAL 16.5 KDA PROTEIN, CHLOROPLASTIC (1 of 4)	0	147.607	45	11	235	0	7	227	24.2	9.2	826.55	11	1.44	1.424	3.656	1	1	1	76.6	53.2	75.7	194.5	79.67	101.79	75.48	9.59	2.55845e+08	1.90654e+08	7.88487e+08	1.68077e+08	1.77707e+08	9.12083e+08	2.53055e+08	2.19749e+08	7.82822e+08	7.11592e+08	5.87005e+08	6.49705e+08	High	High	High	High	High	High	High
FALSE	High	Master Protein	Glyma.02G234200.1.p	K00430 - peroxidase (E1.11.1.7) (1 of 157)	0	147.588	57	14	131	4	5	324	34.9	9.11	391.89	14	0.981	1.655	3.437	1	0.131504	0.00133525	55.5	56.6	93.6	194.4	17.64	11.56	11.64	10.4	2.71147e+07	3.85495e+07	3.19455e+07	3.82491e+07	3.07428e+07	3.25758e+07	5.39255e+07	4.50527e+07	5.65744e+07	1.11972e+08	9.93019e+07	1.22411e+08	High	High	Peak Found	High	High	High	High
FALSE	High	Master Protein	Glyma.15G170700.1.p	K11279 - nucleosome assembly protein 1-like 1 (NAP1L1, NRP) (1 of 3)	0	147.37	36	11	116	0	8	363	41.4	4.48	348.44	11	1.393	1.339	2.148	1	1	1	94.8	68	91.1	146.1	43.43	88.47	40.4	21.7	3.33777e+07	4.86288e+07	7.92135e+07	3.32575e+07	3.48989e+07	1.40809e+08	4.67456e+07	3.82631e+07	8.03775e+07	7.49742e+07	7.27853e+07	1.05554e+08	High	High	High	High	High	High	High
FALSE	High	Master Protein	Glyma.13G290900.1.p	PTHR18860//PTHR18860:SF31 - 14-3-3 PROTEIN // SUBFAMILY NOT NAMED (1 of 7)	0	147.267	57	17	160	0	1	261	29.5	4.83	350.77	17	0.546	0.209	0.334	1	0.288226	0.308957	104.5	191.5	40	64	34.19	55.12	43.03	39.14	6.83099e+06	9.47846e+06	4.69969e+06	1.77544e+07	4.90254e+06	1.25153e+07	2.08791e+06	4.62287e+06	2.61503e+06	4.28614e+06	4.18315e+06	1.89438e+06	High	High	Peak Found	Peak Found	Peak Found	Not Found	Peak Found
FALSE	High	Master Protein	Glyma.17G073800.1.p	K01255 - leucyl aminopeptidase (CARP, pepA) (1 of 3)	0	147.119	42	18	122	2	3	570	59.8	7.14	356.67	18	2.187	3.407	1.711	0.0243113	0.00240858	0.155206	105.3	48.2	164.1	82.4	8.28	10.82	5.12	21.99	7.42786e+06	6.60422e+06	7.77667e+06	3.39575e+06	3.06839e+06	3.80779e+06	1.21755e+07	1.09906e+07	1.1571e+07	5.80896e+06	3.9186e+06	6.00892e+06	High	High	Peak Found	High	High	Not Found	High
FALSE	High	Master Protein	Glyma.10G039000.1.p	K01900 - succinyl-CoA synthetase beta subunit (LSC2) (1 of 2)	0	147.043	45	17	135	5	5	422	45.3	6.23	403.42	17	1.194	1.457	1.778	1	0.62122	0.44135	87.9	73.7	107.3	131	12.72	18.98	16	30.67	7.93814e+07	6.48347e+07	8.30517e+07	5.31524e+07	6.65074e+07	7.81627e+07	1.16051e+08	8.45656e+07	9.6877e+07	1.18266e+08	1.32226e+08	6.98271e+07	High	High	High	High	High	High	Peak Found
FALSE	High	Master Protein	Glyma.19G242300.1.p	PTHR10314//PTHR10314:SF101 - SER/THR DEHYDRATASE, TRP SYNTHASE // SUBFAMILY NOT NAMED (1 of 6)	0	146.652	49	13	123	4	4	325	34.3	5.6	362.41	13	1.294	0.01	0.01	1			225.6	174.4			21.86	26.68			1.61894e+06	1.50396e+06	1.04485e+06	815501	1.16258e+06	1.41694e+06							High	High	Not Found	High	High	Not Found	High
FALSE	High	Master Protein	Glyma.06G183900.1.p	PTHR11699:SF180 - ALDEHYDE DEHYDROGENASE FAMILY 2 MEMBER B7, MITOCHONDRIAL (1 of 9)	0	146.501	42	19	124	10	13	540	58.9	7.52	305.95	19	0.908	0.707	0.437	1	1	0.0573402	119	131	92.6	57.3	19.07	9.12	8.34	38.68	1.16184e+08	1.10068e+08	7.98425e+07	1.26084e+08	1.21156e+08	1.05532e+08	7.61364e+07	8.97758e+07	8.5656e+07	2.59019e+07	5.95918e+07	5.29912e+07	High	High	High	High	High	Peak Found	High
FALSE	High	Master Protein	Glyma.14G037300.1.p	PF03168 - Late embryogenesis abundant protein (LEA_2) (1 of 105)	0	146.497	52	14	123	4	4	320	35.6	4.98	365.06	14	1.025	2.75	3.955	1	1	0.441567	47	45.8	126	181.2	34.37	6.36	51.46	52.71	2.65866e+06	3.50978e+06	5.22041e+06	3.66603e+06	3.22887e+06	3.42549e+06	9.41847e+06	3.01427e+06	9.80744e+06	4.48393e+06	1.35461e+07	1.55721e+07	High	High	High	High	Peak Found	Peak Found	Not Found
FALSE	High	Master Protein	Glyma.08G334000.1.p	PTHR11468:SF4 - ALPHA-GLUCAN PHOSPHORYLASE 2, CYTOSOLIC (1 of 2)	0	146.201	31	21	85	4	21	846	95.8	6.43	186.09	21	1.253	0.562	1.773	1	1	1	109.2	87.2	49	154.6	38.99	20.92	18.38	61.07	9.63196e+07	7.7125e+07	1.59894e+08	8.57762e+07	7.68813e+07	5.60576e+07	3.10721e+07	4.32084e+07	4.40074e+07	3.37292e+07	1.36278e+08	1.60397e+08	High	High	High	High	High	Peak Found	High
FALSE	High	Master Protein	Glyma.13G326200.1.p	PTHR18929:SF74 - PROTEIN DISULFIDE-ISOMERASE A3 (1 of 4)	0	146.107	39	20	195	7	7	558	62.3	4.87	507.02	20	1.134	1.292	1.799	1	1	1	86.8	76.6	98.9	137.7	42.39	66.11	54.56	7.86	4.28493e+07	4.21862e+07	8.38498e+07	3.77771e+07	3.2634e+07	1.00162e+08	2.73847e+07	4.88119e+07	8.55449e+07	6.7953e+07	7.5432e+07	6.48124e+07	High	High	High	High	High	High	High
FALSE	High	Master Protein	Glyma.16G087200.1.p	K17732 - mitochondrial-processing peptidase subunit beta [EC:3.4.24.64] (PMPCB, MAS1) (1 of 3)	0	145.647	39	18	96	0	6	523	58.5	6.73	245.07	18	1.436	1.74	0.731	1	1	0.772727	117.1	81.5	141.8	59.6	16.39	7.13	30.37	57.6	9.12677e+06	1.15859e+07	8.5825e+06	5.77479e+06	6.35628e+06	6.65158e+06	1.47538e+07	7.92934e+06	1.10575e+07	1.39116e+06	5.73628e+06	4.64421e+06	High	High	High	High	High	Not Found	High
FALSE	High	Master Protein	Glyma.20G027200.1.p		0	145.571	73	10	362	7	7	125	12.5	5.27	1163.1	10	1.105	0.988	3.164	1	1	0.914882	70.7	63.9	63.1	202.3	79.68	82.64	73.73	42.57	5.18807e+08	6.8678e+08	2.13079e+09	4.21221e+08	6.21398e+08	1.92794e+09	6.13836e+08	6.10855e+08	1.97393e+09	1.96634e+09	1.1671e+09	2.86951e+09	High	High	High	High	High	High	High
FALSE	High	Master Protein	Glyma.18G219100.1.p	5.4.2.11//5.4.2.12 - Phosphoglycerate mutase (2,3-diphosphoglycerate-dependent) / Phosphoglyceromutase // Phosphoglycerate mutase (2,3-diphosphoglycerate-independent) / Phosphoglyceromutase (1 of 2)	0	145.272	37	16	109	1	1	559	60.8	5.87	337.69	16																											High	Not Found	Not Found	Not Found	Not Found	Not Found	Not Found
FALSE	High	Master Protein	Glyma.12G210400.1.p	PTHR18860//PTHR18860:SF31 - 14-3-3 PROTEIN // SUBFAMILY NOT NAMED (1 of 7)	0	144.93	56	17	161	0	1	261	29.4	4.78	356.86	17																											High	High	Not Found	High	High	Not Found	Not Found
FALSE	High	Master Protein	Glyma.06G137700.1.p	K03626 - nascent polypeptide-associated complex subunit alpha (EGD2, NACA) (1 of 8)	0	144.859	60	8	160	2	2	223	24.2	4.45	562.66	8	0.223	0.11	0.736	0.0218448	0.00267668	0.92393	43.2	193.3	21.2	142.3	13.66	28.33	25.79	36.15	8.73556e+06	1.15091e+07	1.02958e+07	4.61273e+07	3.75077e+07	6.49435e+07	5.47514e+06	5.06158e+06	3.24775e+06	4.93236e+07	3.39538e+07	2.37107e+07	High	High	Peak Found	High	High	High	Not Found
FALSE	High	Master Protein	Glyma.12G172800.1.p	PTHR18929:SF74 - PROTEIN DISULFIDE-ISOMERASE A3 (1 of 4)	0	144.809	36	21	196	8	8	602	67.3	4.97	526.87	21	1.187	0.936	1.401	1	1	1	105	88.4	82.8	123.9	49.08	25.71	66.04	24.14	3.9486e+07	5.8898e+07	1.04027e+08	4.44899e+07	4.96057e+07	7.11802e+07	2.49717e+07	4.64364e+07	9.72805e+07	6.95173e+07	8.76144e+07	5.3706e+07	High	High	High	High	High	High	High
FALSE	High	Master Protein	Glyma.05G046300.1.p	PTHR23359//PTHR23359:SF99 - NUCLEOTIDE KINASE // SUBFAMILY NOT NAMED (1 of 5)	0	144.623	63	16	175	0	2	242	26.6	7.81	519.94	16	0.697	1.241	4.338	1	1	0.492923	38.3	55	68.2	238.5	85.53	79.03	59.1	34.99	9.62316e+06	1.53913e+07	4.84283e+07	2.2088e+07	1.71307e+07	6.86272e+07	2.74217e+07	2.18957e+07	6.25138e+07	7.86582e+07	9.58214e+07	1.51363e+08	Peak Found	High	High	Peak Found	High	High	High
FALSE	High	Master Protein	Glyma.04G228400.1.p	PTHR33231:SF1 - 30S RIBOSOMAL PROTEIN-RELATED (1 of 2)	0	144.617	46	10	132	5	5	291	32.7	6.61	521.25	10	1.16	0.771	3.003	1	1	1	78.2	67.4	51.9	202.4	34.3	77.1	41.05	39.35	9.40252e+07	1.21482e+08	1.83009e+08	1.04707e+08	1.04408e+08	3.56223e+08	8.0688e+07	7.21429e+07	1.47115e+08	3.14408e+08	1.40547e+08	3.17725e+08	High	High	High	High	High	High	High
FALSE	High	Master Protein	Glyma.05G049200.1.p	PTHR23322:SF3 - PROTEIN SAY1 (1 of 6)	0	144.445	39	15	64	6	6	598	65.7	4.73	194.65	15	0.16	0.185	0.849	0.000800998	0.000522702	0.524278	29.1	182.3	33.7	154.9	12.74	23.26	16.56	7.29	2.38138e+06	2.59169e+06	3.04746e+06	1.62231e+07	1.56766e+07	2.33547e+07	2.38197e+06	3.32992e+06	2.99535e+06	1.2336e+07	1.42039e+07	1.37808e+07	Peak Found	High	Not Found	Not Found	Peak Found	High	Not Found
FALSE	High	Master Protein	Glyma.19G220200.1.p	PTHR11964:SF18 - S-ADENOSYLMETHIONINE SYNTHASE 2 (1 of 2)	0	144.42	34	11	101	0	2	394	43.2	5.91	298.24	11	1.094	0.381	0.01	1	0.489443		176.7	161.6	61.6		28.42	10.51	63.5		2.08065e+06	1.22462e+06	2.15618e+06	1.72254e+06	2.12472e+06	1.90269e+06	725458	1.75181e+06	565009				High	High	Not Found	High	High	Not Found	High
FALSE	High	Master Protein	Glyma.12G181600.1.p	PTHR23084//PTHR23084:SF155 - PHOSPHATIDYLINOSITOL-4-PHOSPHATE 5-KINASE RELATED // SUBFAMILY NOT NAMED (1 of 2)	0	144.25	29	20	106	4	4	859	98.9	4.53	246.75	20	3.727	4.644	4.557	0.293234	0.181027	0.0843683	107	28.7	133.4	130.9	9.67	12.95	67.03	11.94	1.51346e+07	1.71501e+07	1.83664e+07	4.60162e+06	5.51214e+06	4.31986e+06	2.13704e+07	6.79041e+06	3.50203e+07	2.09683e+07	2.46847e+07	1.96758e+07	High	High	High	High	High	Peak Found	High
FALSE	High	Master Protein	Glyma.06G113200.1.p	K03542 - photosystem II 22kDa protein (psbS) (1 of 3)	0	143.979	31	9	184	2	2	273	29	6.86	647.81	9	0.679	0.678	0.179	1	1	0.318696	107.1	157.8	106.9	28.3	59.14	49.75	41.17	49.52	3.19294e+08	2.04005e+08	8.10597e+07	3.00623e+08	3.18002e+08	1.02671e+08	2.50591e+08	203736624	1.01449e+08	5.38368e+07	8.99045e+07	3.23805e+07	High	High	High	High	High	High	High
FALSE	High	Master Protein	Glyma.19G243800.1.p	K01807 - ribose 5-phosphate isomerase A (rpiA) (1 of 5)	0	143.751	34	8	143	1	1	281	30	6.42	570.07	8																											Not Found	Not Found	Not Found	Not Found	High	Not Found	Not Found
FALSE	High	Master Protein	Glyma.15G143100.1.p	1.8.1.4 - Dihydrolipoyl dehydrogenase / Lipoyl dehydrogenase (1 of 6)	0	143.517	41	17	121	4	6	565	60.1	7.36	352.3	17	1.384	1.601	1.289	0.700708	0.133425	0.874702	105	75.8	121.4	97.8	18.95	14.75	15.65	19.13	8.59111e+07	6.86617e+07	5.92829e+07	4.19209e+07	5.64718e+07	4.96216e+07	1.01618e+08	7.72577e+07	7.94409e+07	4.96761e+07	6.39666e+07	7.33629e+07	High	High	High	High	High	Peak Found	High
FALSE	High	Master Protein	Glyma.12G156200.1.p	PTHR33449:SF1 - NUCLEOID-ASSOCIATED PROTEIN YBAB (1 of 2)	0	143.212	44	9	184	0	1	196	21.3	8.22	600.17	9	2.645	0.626	1.676	1	1	1	177.9	67.3	42.1	112.7	6.57	29.28	98.98	37.24	8.76076e+07	9.5789e+07	9.97773e+07	3.36158e+07	3.62179e+07	5.608e+07	2.2672e+07	21080326	1.09373e+08	5.62632e+07	1.06324e+08	6.06893e+07	High	High	High	High	High	High	High
FALSE	High	Master Protein	Glyma.20G079300.1.p	PTHR11353//PTHR11353:SF80 - CHAPERONIN // SUBFAMILY NOT NAMED (1 of 4)	0	143.101	40	24	196	2	2	575	61	6.7	470.68	24	1.29	1.887	2.288	1	1	0.791049	79.8	61.9	116.8	141.6	86.45	19.87	76.41	56.09	7.06802e+06	6.84766e+06	2.77551e+07	5.48029e+06	6.58625e+06	4.40452e+06	6.56885e+06	1.03421e+07	2.79956e+07	7.90377e+06	2.40633e+07	1.2539e+07	High	High	High	High	High	High	Peak Found
FALSE	High	Master Protein	Glyma.09G044200.1.p	PTHR11991 - TRANSLATIONALLY CONTROLLED TUMOR PROTEIN-RELATED (1 of 4)	0	142.96	68	10	134	4	4	168	19	4.73	497.09	10	1.634	1.324	1.606	1	1	1	117.5	71.9	95.2	115.5	74.54	30.5	85.56	79.11	6.976e+07	5.30069e+07	1.99172e+08	4.27031e+07	4.71284e+07	2.50534e+07	2.43308e+07	5.65256e+07	1.52053e+08	6.85756e+07	1.29537e+08	1.64756e+07	High	High	High	High	High	High	High
FALSE	High	Master Protein	Glyma.18G018600.1.p	K01858 - myo-inositol-1-phosphate synthase (E5.5.1.4, INO1) (1 of 3)	0	142.863	35	15	91	0	3	510	56.4	5.54	276.49	15	2.366	2.466	3.773	0.509174	0.796616	0.351816	98.5	41.6	102.7	157.1	118.14	33.35	50.44	3.07	4.78429e+06	3.9436e+06	3.24193e+07	2.02251e+06	2.24495e+06	1.1153e+06	4.98712e+06	2.98063e+06	8.43193e+06	8.03754e+06	7.61929e+06	7.63129e+06	Peak Found	High	High	High	Peak Found	Not Found	Peak Found
FALSE	High	Master Protein	Glyma.03G192300.1.p	K00700 - 1,4-alpha-glucan branching enzyme (glgB) (1 of 3)	0	142.479	35	25	86	0	8	870	99	5.45	193.36	25	1.024	0.681	0.478	1	1	0.229234	128.7	125.7	85.6	60.1	8.22	48.3	6.6	22.39	2.34461e+07	2.03863e+07	2.37191e+07	3.54941e+07	1.26539e+07	2.29055e+07	1.67312e+07	1.46657e+07	1.55923e+07	1.09545e+07	7.8261e+06	1.23679e+07	High	High	High	High	High	High	Not Found
FALSE	High	Master Protein	Glyma.13G359500.1.p	PTHR19375//PTHR19375:SF190 - HEAT SHOCK PROTEIN 70KDA // SUBFAMILY NOT NAMED (1 of 4)	0	142.396	27	20	101	0	5	863	95.4	5.21	243.28	20	1.021	0.598	0.344	1	1	0.883171	137.8	135	80.8	46.4	12.21	46.86	37.94	46.99	5.15436e+07	5.93686e+07	4.66586e+07	5.41986e+07	5.05003e+07	1.90306e+07	3.02097e+07	2.99147e+07	5.53596e+07	1.73689e+07	3.60615e+07	1.67101e+07	High	High	High	High	High	High	High
FALSE	High	Master Protein	Glyma.13G135600.1.p	PTHR11260//PTHR11260:SF222 - GLUTATHIONE S-TRANSFERASE, GST, SUPERFAMILY, GST DOMAIN CONTAINING // SUBFAMILY NOT NAMED (1 of 7)	0	142.361	59	14	92	11	11	239	27.2	5.53	281.1	14	1.204	0.795	1.139	1	0.632202	1	116.3	96.7	76.9	110.1	7.94	11.96	15.73	10.9	9.33143e+07	1.05364e+08	9.11164e+07	7.62354e+07	7.75326e+07	9.3949e+07	6.16498e+07	7.89824e+07	5.9996e+07	8.28943e+07	8.8323e+07	1.02165e+08	High	High	High	High	High	Peak Found	High
FALSE	High	Master Protein	Glyma.04G249700.1.p	K03542 - photosystem II 22kDa protein (psbS) (1 of 3)	0	142.358	31	9	203	2	2	273	29	6.86	676.22	9	0.719	0.683	0.297	1	1	0.782313	106.6	148.2	101.2	44.1	47.39	56.23	57.4	47.78	1.19574e+08	8.32404e+07	4.2206e+07	1.15746e+08	1.35135e+08	3.43684e+07	8.87051e+07	7.9008e+07	2.16588e+07	3.44284e+07	4.95635e+07	1.73163e+07	High	High	High	High	High	High	High
FALSE	High	Master Protein	Glyma.17G240400.1.p	K13126 - polyadenylate-binding protein (PABPC) (1 of 14)	0	142.206	28	14	105	4	9	654	71.9	7.15	306.08	14	0.887	0.273	1.264	1	0.021721	1	103.7	116.8	31.8	147.7	5.84	23.61	17.49	30.82	1.00577e+08	1.09567e+08	1.12675e+08	1.40619e+08	8.66107e+07	1.23491e+08	3.23949e+07	3.36586e+07	4.40938e+07	1.56058e+08	9.74261e+07	1.86272e+08	High	High	High	High	High	High	High
FALSE	High	Master Protein	Glyma.13G207900.1.p	K01687 - dihydroxy-acid dehydratase (ilvD) (1 of 1)	0	142.178	32	15	102	15	15	601	64.1	6.11	276.81	15	0.902	0.85	0.44	1	0.864504	0.0130261	113	125.3	106.5	55.2	9.64	7.15	17.76	19.52	1.4127e+08	1.55318e+08	1.28044e+08	1.50968e+08	1.56664e+08	1.73047e+08	1.50696e+08	1.33195e+08	1.05052e+08	6.02854e+07	8.7921e+07	6.89703e+07	High	High	High	High	High	Peak Found	High
FALSE	High	Master Protein	Glyma.08G131600.1.p	PTHR32091:SF0 - EUKARYOTIC INITIATION FACTOR 4B-RELATED (1 of 3)	0	141.785	45	26	124	0	13	551	59.4	8.94	347.64	26	0.731	0.564	2.174	1	0.617062	0.0698424	65.5	89.5	50.5	194.6	5.68	12.54	40.08	11.28	6.02009e+07	5.78372e+07	6.46494e+07	8.22988e+07	7.43696e+07	9.52262e+07	4.54213e+07	4.64114e+07	8.73755e+07	1.58641e+08	1.78931e+08	1.99001e+08	High	Peak Found	High	High	High	High	Peak Found
FALSE	High	Master Protein	Glyma.16G204000.1.p	PTHR11638//PTHR11638:SF105 - ATP-DEPENDENT CLP PROTEASE // SUBFAMILY NOT NAMED (1 of 5)	0	141.542	46	9	105	3	6	252	27.1	8.69	331.67	9	1.103	1.307	1.555	1	1	0.556916	88.9	80.6	105.3	125.3	29.16	6.66	55.54	41.14	7.65232e+07	8.0658e+07	1.2616e+08	6.50223e+07	7.31779e+07	7.31065e+07	7.07337e+07	9.5539e+07	1.97924e+08	1.13687e+08	2.1037e+08	1.04242e+08	High	High	High	High	High	High	High
FALSE	High	Master Protein	Glyma.08G108900.2.p	K00600 - glycine hydroxymethyltransferase (glyA, SHMT) (1 of 12)	0	141.325	35	17	99	0	1	541	59.8	8.21	273.3	17	3.261	2.676	5.699	0.881034	1	0.0865511	103.2	31.7	84.7	180.4	56.78	22.68	54.41	23.55	3.12787e+06	8.79249e+06	1.21331e+07	2.69627e+06	1.97326e+06	3.1442e+06	2.15106e+06	7.21447e+06	7.84679e+06	2.086e+07	1.53668e+07	1.33394e+07	High	High	High	High	High	Peak Found	Peak Found
FALSE	High	Master Protein	Glyma.08G020500.1.p	K00033 - 6-phosphogluconate dehydrogenase (PGD, gnd, gntZ) (1 of 4)	0	141.274	35	16	114	0	13	495	53.7	6.57	273.77	16	1.031	0.852	0.655	1	1	0.292773	116.6	113	96.3	74.1	16.39	12.67	10.01	11.39	9.76198e+07	9.03822e+07	1.2272e+08	9.75806e+07	9.46585e+07	7.66196e+07	6.80353e+07	8.06443e+07	8.19873e+07	6.06976e+07	7.42692e+07	6.20354e+07	High	High	High	High	High	Peak Found	High
FALSE	High	Master Protein	Glyma.13G064900.1.p	PTHR11743//PTHR11743:SF31 - VOLTAGE-DEPENDENT ANION-SELECTIVE CHANNEL // SUBFAMILY NOT NAMED (1 of 6)	0	140.938	64	15	146	6	6	276	29.7	9.06	478.5	15	0.928	0.793	1.258	1	1	1	93.3	100.5	79.7	126.5	23.12	28.13	38.97	19.56	5.16536e+07	7.14145e+07	4.66785e+07	4.19083e+07	5.56586e+07	7.3964e+07	4.33488e+07	4.41268e+07	8.18236e+07	8.01648e+07	7.0027e+07	5.37955e+07	High	High	High	High	High	High	High
FALSE	High	Master Protein	Glyma.12G165500.1.p	K03233 - elongation factor 1-gamma (EEF1G) (1 of 4)	0	140.646	35	13	102	0	3	418	47.4	6.02	303.16	13	0.953	1.18	0.331	1	1	0.104463	110.1	115.5	136.2	38.2	29.73	28.25	18.29	25.37	4.83766e+07	2.94747e+07	3.02097e+07	3.25346e+07	3.16945e+07	1.86197e+07	3.73972e+07	27041416	3.83325e+07	9.21713e+06	1.47868e+07	1.04964e+07	High	High	Peak Found	High	High	Peak Found	High
FALSE	High	Master Protein	Glyma.05G237000.2.p	K01835 - phosphoglucomutase (pgm) (1 of 4)	0	140.618	40	20	119	1	1	582	63.5	5.53	271.35	20																											Not Found	Not Found	High	Not Found	Not Found	Not Found	Not Found
FALSE	High	Master Protein	Glyma.18G021500.1.p	4.1.1.37 - Uroporphyrinogen decarboxylase / Uroporphyrinogen-III carboxy-lyase (1 of 4)	0	140.572	43	11	84	3	3	387	42.7	7.83	255.87	11	0.824	0.536	0.804	1	1	1	104.2	126.4	67.8	101.7	45.49	12.16	56.89	18.35	2.78428e+07	3.26674e+07	6.22156e+07	3.66122e+07	3.96289e+07	4.63179e+07	2.09957e+07	21247546	5.21147e+07	2.47435e+07	3.59248e+07	3.18796e+07	High	High	High	High	High	Not Found	High
FALSE	High	Master Protein	Glyma.19G153200.1.p	PTHR23115//PTHR23115:SF155 - TRANSLATION FACTOR // SUBFAMILY NOT NAMED (1 of 2)	0	140.517	48	15	100	0	1	452	49.1	6.87	254.7	15																											Not Found	Not Found	Not Found	Not Found	High	Not Found	High
FALSE	High	Master Protein	Glyma.13G328600.1.p	K01955 - carbamoyl-phosphate synthase large subunit (carB, CPA2) (1 of 2)	0	140.34	26	26	152	9	9	1166	127.4	5.31	374.08	26	1.296	1.015	0.458	0.761016	1	0.0235481	137.6	106.1	107.7	48.6	19.76	9.15	14.33	21.94	3.65501e+07	2.80169e+07	2.51934e+07	1.86178e+07	2.1616e+07	2.21469e+07	2.56318e+07	2.19365e+07	1.92736e+07	6.78995e+06	1.04909e+07	9.89366e+06	High	High	High	High	High	Not Found	High
FALSE	High	Master Protein	Glyma.11G235400.1.p	4.1.1.37 - Uroporphyrinogen decarboxylase / Uroporphyrinogen-III carboxy-lyase (1 of 4)	0	140.127	43	12	84	4	4	387	42.7	7.49	247.7	12	1.258	0.604	0.133	1	1	0.178674	168	133.6	80.6	17.8	15.54	9.5	57.72	107.51	2.51464e+07	3.37507e+07	3.29711e+07	2.96311e+07	2.62144e+07	2.46458e+07	1.42075e+07	1.58295e+07	3.74745e+07	1.9022e+06	1.57682e+07	3.4996e+06	High	High	High	High	High	Peak Found	High
FALSE	High	Master Protein	Glyma.02G147000.1.p	K02838 - ribosome recycling factor (frr, MRRF, RRF) (1 of 2)	0	140.055	48	16	284	0	5	261	29	9.57	795.77	16	1.2	1.14	3.557	1	1	1	69.6	58	66.1	206.3	112.19	100.25	112.07	29.3	2.33871e+08	3.48304e+08	1.88817e+09	2.50028e+08	2.90263e+08	1.38247e+09	2.54088e+08	3.30774e+08	1.89659e+09	8.83662e+08	1.03248e+09	1.5258e+09	High	High	High	High	High	High	High
FALSE	High	Master Protein	Glyma.10G298200.1.p	PTHR11071:SF11 - PEPTIDYL-PROLYL CIS-TRANS ISOMERASE C (1 of 2)	0	139.985	35	10	136	3	3	251	26.9	9.07	371.05	10	1.083	0.254	1.846	1	1	1	103.6	95.6	24.3	176.5	51.18	0.11	132.73	13.56	2.3167e+06	4.46382e+06	7.01965e+06	4.12708e+06	4.11986e+06	4.11894e+06	584356	1.04667e+06	8.79541e+06	6.66845e+06	8.74512e+06	7.60322e+06	High	High	Peak Found	High	High	Not Found	High
FALSE	High	Master Protein	Glyma.16G168000.1.p	K03841 - fructose-1,6-bisphosphatase I (FBP, fbp) (1 of 8)	0	139.939	45	13	154	6	6	342	37.3	5.71	447.5	13	1.167	1.568	1.262	1	1	1	93.4	80	125.6	101	140.27	23.8	125.03	119.44	7.12959e+07	5.2678e+07	8.53102e+08	6.36111e+07	6.11101e+07	3.98484e+07	7.12418e+07	9.58475e+07	7.327e+08	7.7114e+07	5.42289e+08	6.44888e+07	High	High	High	High	High	High	High
FALSE	High	Master Protein	Glyma.06G001800.1.p	PTHR11229:SF5 - 50S RIBOSOMAL PROTEIN L3-1, CHLOROPLASTIC (1 of 2)	0	139.757	49	12	185	4	4	264	29	10.56	557.79	12	1.139	0.921	1.726	1	1	1	95.2	83.6	77	144.3	27.11	73.58	43.48	21.24	1.52851e+07	1.8783e+07	2.59214e+07	1.36736e+07	1.64836e+07	4.83337e+07	1.51856e+07	2.53727e+07	1.08566e+07	3.86071e+07	2.62139e+07	2.84587e+07	High	High	Peak Found	High	High	High	High
FALSE	High	Master Protein	Glyma.16G073600.1.p	1.3.1.105 - 2-methylene-furan-3-one reductase / Enone oxidoreductase (1 of 6)	0	139.644	68	18	113	17	17	319	34.6	6.67	339.72	18	1.144	1.125	0.917	1	1	1	109.3	95.6	107.5	87.6	5.09	36.63	4.03	40.16	1.61669e+08	1.70585e+08	1.54108e+08	1.41365e+08	1.49511e+08	6.95425e+07	1.59012e+08	1.68935e+08	1.56662e+08	1.09531e+08	2.26017e+08	1.29634e+08	High	High	High	High	High	High	High
FALSE	High	Master Protein	Glyma.08G151900.1.p	K02934 - large subunit ribosomal protein L6e (RP-L6e, RPL6) (1 of 6)	0	139.581	60	13	112	2	5	232	25.9	10.08	300.15	13	1.021	0.67	0.54	1	0.872313	0.594827	126.4	123.8	82.9	66.8	16.56	7.95	45.48	32.35	7.14827e+07	7.24863e+07	5.31564e+07	6.7239e+07	6.99942e+07	7.82077e+07	4.68735e+07	7.24514e+07	2.79616e+07	3.77871e+07	3.30609e+07	5.94076e+07	High	High	Peak Found	High	High	High	High
FALSE	High	Master Protein	Glyma.17G100600.1.p	PTHR11540:SF14 - MALATE DEHYDROGENASE, CHLOROPLASTIC (1 of 2)	0	139.47	44	13	136	0	6	409	43.1	7.97	397.04	13	1.091	1.125	1.096	1	1	1	101.2	92.8	104.4	101.6	4.96	34.3	19.48	13.45	6.54314e+07	6.3616e+07	6.99968e+07	5.99606e+07	6.4283e+07	3.15078e+07	5.39551e+07	6.74726e+07	8.01214e+07	6.56978e+07	6.95518e+07	5.33659e+07	High	High	High	High	High	Peak Found	High
FALSE	High	Master Protein	Glyma.11G079000.1.p	1.1.1.85 - 3-isopropylmalate dehydrogenase / IMDH (1 of 3)	0	139.235	47	16	89	0	5	405	43.6	6.07	270.99	16	1.327	1.46	0.351	1	1	0.217097	128.3	96.7	141.1	34	47.13	18.89	17.23	48.99	3.01949e+07	2.47996e+07	5.78445e+07	2.27508e+07	2.8579e+07	1.97794e+07	2.7168e+07	3.32089e+07	3.85173e+07	1.56885e+07	7.9949e+06	6.50305e+06	High	High	High	High	High	Peak Found	High
FALSE	High	Master Protein	Glyma.04G227400.1.p	K03626 - nascent polypeptide-associated complex subunit alpha (EGD2, NACA) (1 of 8)	0	139.197	53	7	152	1	1	223	24.2	4.45	516.02	7	0.211	0.167	1.088	0.0307059	0.0121629	1	34.3	162.2	27.1	176.5	24.94	40.86	36.48	20.44	8.47978e+06	7.03903e+06	5.06986e+06	3.33182e+07	2.41474e+07	5.37305e+07	3.60851e+06	5557978	7.71172e+06	3.62585e+07	2.69054e+07	4.08008e+07	Not Found	High	Not Found	High	Peak Found	High	Not Found
FALSE	High	Master Protein	Glyma.03G150600.1.p	PTHR23115//PTHR23115:SF155 - TRANSLATION FACTOR // SUBFAMILY NOT NAMED (1 of 2)	0	139.073	47	15	99	1	1	454	49.3	6.87	254.7	15	100	100	100				95.1		135	169.9	36.58		42.17	51.95	4.45179e+06	2.6881e+06	2.2912e+06				3.81522e+06	5816331	2.44146e+06	7.51821e+06	2.4169e+06	4.80314e+06	Peak Found	Peak Found	Not Found	Not Found	Not Found	Not Found	Peak Found
FALSE	High	Master Protein	Glyma.04G191700.1.p	PTHR18901//PTHR18901:SF9 - 2-DEOXYGLUCOSE-6-PHOSPHATE PHOSPHATASE 2 // SUBFAMILY NOT NAMED (1 of 2)	0	138.997	49	14	190	3	3	328	35.4	6.79	515.52	14	0.958	0.912	0.466	1	1	0.525481	114.9	119.9	109.3	55.9	9.4	38.1	4.34	25.89	1.03869e+08	1.13988e+08	9.44256e+07	1.08369e+08	1.11327e+08	5.04704e+07	9.51206e+07	98851618	1.03718e+08	5.05296e+07	6.68975e+07	3.99437e+07	High	High	High	High	High	High	High
FALSE	High	Master Protein	Glyma.16G204100.1.p	PTHR11638//PTHR11638:SF105 - ATP-DEPENDENT CLP PROTEASE // SUBFAMILY NOT NAMED (1 of 5)	0	138.744	49	12	118	3	3	260	28.3	8.76	336.57	12	1.029	0.965	2.14	1	1	1	80.2	77.9	75.2	166.8	80.67	32.04	85.56	45.32	2.03843e+07	1.45546e+07	6.2634e+07	1.98137e+07	1.11233e+07	2.16215e+07	1.91108e+07	1.09653e+07	5.79412e+07	1.90587e+07	5.27363e+07	4.24086e+07	High	High	High	High	High	High	High
FALSE	High	Master Protein	Glyma.10G047700.1.p	PTHR11260//PTHR11260:SF222 - GLUTATHIONE S-TRANSFERASE, GST, SUPERFAMILY, GST DOMAIN CONTAINING // SUBFAMILY NOT NAMED (1 of 7)	0	138.73	59	15	128	1	4	237	27.1	5.52	400.71	15	1.56	1.534	0.878	1	1	1	125.5	80.5	123.4	70.6	8.37	28.34	57.82	44.04	2.65897e+07	2.34237e+07	2.75599e+07	1.70462e+07	1.71752e+07	9.8939e+06	7.09906e+06	26149740	2.95708e+07	1.23753e+07	2.74059e+07	1.49616e+07	High	High	High	High	High	Peak Found	High
FALSE	High	Master Protein	Glyma.02G064700.1.p	K08907 - light-harvesting complex I chlorophyll a/b binding protein 1 (LHCA1) (1 of 2)	0	138.618	23	8	142	0	8	246	26.7	6.68	432.13	8	0.916	0.972	0.231	1	1	1	117.5	128.2	124.7	29.6	18.85	76.53	24.31	82.41	2.74667e+09	2.30163e+09	1.87654e+09	2.51285e+09	3.41454e+09	3.17221e+08	2.71168e+09	2.44356e+09	1.65098e+09	5.79581e+08	1.76108e+09	3.78509e+08	High	High	High	High	High	High	High
FALSE	High	Master Protein	Glyma.19G125500.1.p	K03626 - nascent polypeptide-associated complex subunit alpha (EGD2, NACA) (1 of 8)	0	138.608	75	8	125	0	2	205	22.4	4.63	477.08	8	0.448	0.01	1.266	0.520838		1	66	147.4		186.6	12.23	60.94		48.98	6.96997e+06	7.97319e+06	8.91537e+06	1.78145e+07	1.63037e+07	4.47938e+07				2.25561e+07	8.18847e+06	2.509e+07	High	High	Not Found	High	High	High	High
FALSE	High	Master Protein	Glyma.10G124700.1.p	2.3.1.16 - Acetyl-CoA C-acyltransferase / Beta-ketothiolase (1 of 4)	0	138.481	41	12	119	0	2	463	48.6	7.8	349.83	12	0.817	0.527	1.493	1	0.926671	0.883389	85.2	104.2	54.9	155.7	68.54	10.82	33.67	24.48	3.68253e+06	4.01421e+06	1.13994e+07	5.43991e+06	4.91179e+06	4.37756e+06	4.07865e+06	2586229	2.19454e+06	1.04166e+07	6.68398e+06	7.33545e+06	High	Peak Found	High	High	Peak Found	Not Found	High
FALSE	High	Master Protein	Glyma.15G005400.1.p	1.1.1.85 - 3-isopropylmalate dehydrogenase / IMDH (1 of 3)	0	138.294	40	14	86	0	3	435	47.2	6.55	256.02	14	1.14	1.441	0.753	1	1	1	105.2	92.3	133	69.5	81.7	48.52	29.53	19.06	1.21889e+08	3.70331e+07	2.94874e+07	3.24723e+07	5.75315e+07	2.2248e+07	4.68027e+07	6.82389e+07	3.89534e+07	2.44496e+07	2.91893e+07	1.98515e+07	High	High	Peak Found	High	High	Peak Found	High
FALSE	High	Master Protein	Glyma.10G019600.1.p	PTHR19424 - HEAT SHOCK FACTOR BINDING PROTEIN 1 (1 of 3)	0	138.175	66	5	113	2	2	108	12	4.46	385.98	5	1.39	0.593	0.839	0.464597	0.0540926	0.890908	145.5	104.7	62	87.8	13.23	6.76	22.93	5.76	7.30468e+07	9.28691e+07	7.61029e+07	6.11448e+07	5.47368e+07	5.42981e+07	3.24398e+07	2.53464e+07	4.03356e+07	4.55793e+07	4.59121e+07	5.04575e+07	High	High	High	High	High	High	High
FALSE	High	Master Protein	Glyma.04G052900.1.p	K03257 - translation initiation factor 4A (EIF4A) (1 of 11)	0	137.858	39	16	136	0	3	413	46.7	5.48	346.43	16	1.395	0.01	0.01	0.401731			233	167			14.83	14.89			1.19173e+06	996474	1.34481e+06	854542	938806	695575							Not Found	Not Found	Peak Found	Peak Found	High	Not Found	Not Found
FALSE	High	Master Protein	Glyma.01G159500.1.p	K04523 - ubiquilin (UBQLN, DSK2) (1 of 4)	0	137.411	38	11	69	2	2	541	57.2	4.87	191.15	11	0.144	0.01	0.193	0.000800998		0.000616436	43.2	299		57.8	15.42	4.41		12.24	1.82597e+06	2.02073e+06	2.45891e+06	1.39913e+07	1.47104e+07	1.34766e+07				2.7037e+06	2.54646e+06	3.20705e+06	High	High	High	High	High	High	Not Found
FALSE	High	Master Protein	Glyma.11G216400.1.p	PTHR11260:SF171 - GLUTATHIONE S-TRANSFERASE DHAR3, CHLOROPLASTIC (1 of 4)	0	137.33	65	16	136	0	4	259	28.9	8.35	431.04	16	1.023	1.181	2.763	1	1	0.340535	68.6	67	79.2	185.2	50.82	14.11	65.9	20.26	1.63919e+07	1.83665e+07	3.89361e+07	1.79581e+07	2.16361e+07	1.65199e+07	1.02509e+07	2.12065e+07	4.2032e+07	4.96116e+07	4.27992e+07	6.34526e+07	High	High	High	High	High	High	High
FALSE	High	Master Protein	Glyma.10G067500.1.p	PTHR22912:SF144 - MONODEHYDROASCORBATE REDUCTASE, CYTOPLASMIC ISOFORM 1-RELATED (1 of 2)	0	137.305	50	16	138	4	4	433	46.8	5.91	402.29	16	1.044	0.995	0.321	1	1	1	124.3	119	118.4	38.2	82.76	74.63	12.45	80.55	4.43153e+08	4.88869e+08	1.51669e+07	4.24393e+08	4.70448e+08	4.45901e+07	4.22238e+08	4.9855e+08	3.92918e+08	1.36317e+08	2.49825e+08	2.76427e+07	High	High	High	High	High	Peak Found	High
FALSE	High	Master Protein	Glyma.15G014400.1.p	PTHR19375//PTHR19375:SF190 - HEAT SHOCK PROTEIN 70KDA // SUBFAMILY NOT NAMED (1 of 4)	0	137.109	33	21	79	7	7	863	95.7	5.22	196.24	21	3.042	1.406	1.525	0.0392529	0.287476	0.22938	174.5	57.4	80.7	87.5	14.99	26.26	29.78	25.56	2.6972e+07	2.10033e+07	2.80603e+07	8.92754e+06	8.86553e+06	5.38302e+06	1.18881e+07	1.24653e+07	1.97411e+07	1.89544e+07	1.17219e+07	1.35211e+07	High	High	High	High	High	High	High
FALSE	High	Master Protein	Glyma.14G009300.1.p	PTHR22572:SF101 - GLUCOSE-1-PHOSPHATE ADENYLYLTRANSFERASE SMALL SUBUNIT, CHLOROPLASTIC (1 of 2)	0	137.008	42	19	194	2	2	504	55.2	6.48	466.76	19	1.18	0.604	0.798	1	1	1	131.7	111.7	67.4	89.2	37.59	25.28	54.33	13.49	1.31171e+07	2.2114e+07	2.92387e+07	1.87484e+07	1.30924e+07	2.20801e+07	7.39475e+06	1.13154e+07	2.1503e+07	1.48317e+07	1.49653e+07	1.86713e+07	High	High	High	High	High	Not Found	High
FALSE	High	Master Protein	Glyma.20G044800.1.p	PF03168 - Late embryogenesis abundant protein (LEA_2) (1 of 105)	0	136.686	50	13	92	10	10	312	34.3	4.89	250.8	13	0.805	3.11	2.58	1	0.465719	0.683097	43	53.4	166	137.7	91.39	8.67	57.96	33.65	1.63837e+07	2.19996e+07	8.31138e+07	3.00966e+07	2.53365e+07	2.73237e+07	5.18606e+07	8.49774e+07	1.65402e+08	4.67173e+07	9.41339e+07	7.04887e+07	High	High	High	High	High	High	High
FALSE	High	Master Protein	Glyma.03G230300.1.p	PF01789 - PsbP (PsbP) (1 of 26)	0	136.552	58	13	135	10	13	258	29.3	7.43	383.31	13	1.519	1.441	1.022	1	1	1	121.9	80.3	115.7	82.1	35.49	12.24	40.87	73.96	2.35572e+08	2.58714e+08	4.36892e+08	1.70369e+08	1.83581e+08	1.43729e+08	2.45465e+08	1.98983e+08	4.229e+08	1.74187e+08	5.56963e+08	1.70102e+08	High	High	High	High	High	High	High
FALSE	High	Master Protein	Glyma.20G077000.1.p	2.3.1.16 - Acetyl-CoA C-acyltransferase / Beta-ketothiolase (1 of 4)	0	136.128	41	12	116	0	2	461	48.4	7.58	338.11	12																											High	High	Not Found	Not Found	High	Not Found	Not Found
FALSE	High	Master Protein	Glyma.11G097200.1.p	K12271 - signal recognition particle 43 kDa protein (SRP43, CAO) (1 of 1)	0	135.939	52	18	106	16	18	382	41.8	5.02	266.15	18	0.658	1.595	2.488	1	1	1	45.9	69.7	111.1	173.3	118.01	60.64	100.9	32.15	5.95019e+07	7.46327e+07	4.96639e+08	1.06182e+08	1.13387e+08	2.87039e+08	1.30787e+08	1.80871e+08	8.04658e+08	2.17547e+08	4.08931e+08	2.82107e+08	High	High	High	High	High	High	High
FALSE	High	Master Protein	Glyma.10G225400.1.p	K03841 - fructose-1,6-bisphosphatase I (FBP, fbp) (1 of 8)	0	135.898	39	12	138	0	1	338	37	5.58	430.28	12	1.327	1.464	0.01	1	0.492806		140	105.5	154.5		11.85	13.07	16.97		9.37051e+06	8.76951e+06	7.40151e+06	6.60692e+06	7.92789e+06	6.20021e+06	9.67416e+06	10386072	7.40991e+06				High	High	Not Found	High	High	Not Found	High
FALSE	High	Master Protein	Glyma.05G174400.1.p	PTHR32091:SF0 - EUKARYOTIC INITIATION FACTOR 4B-RELATED (1 of 3)	0	135.654	47	23	113	0	10	531	57.8	8.54	324.9	23	0.493	0.291	2.849	0.549106	0.0379682	0.129968	42.6	86.3	25.1	245.9	14.69	12.82	33.51	47.73	2.12731e+07	1.84964e+07	2.48039e+07	4.12121e+07	4.31171e+07	5.21266e+07	7.17628e+06	1.25555e+07	1.4599e+07	7.60785e+07	2.02369e+08	1.22835e+08	Peak Found	High	High	Peak Found	Peak Found	High	Peak Found
FALSE	High	Master Protein	Glyma.20G166400.1.p	K03841 - fructose-1,6-bisphosphatase I (FBP, fbp) (1 of 8)	0	135.447	42	13	143	0	1	339	37.1	5.72	422.5	13	0.41	0.9	0.01	1	1		71	173.1	155.9		39.3	52.62	17.09		1.08948e+06	2.19972e+06	1.26575e+06	1.16036e+06	3.98741e+06	3.08388e+06	2.07305e+06	2.7769e+06	2.88387e+06				Peak Found	High	Not Found	Peak Found	High	Not Found	Not Found
FALSE	High	Master Protein	Glyma.17G133600.1.p	K09560 - suppressor of tumorigenicity protein 13 (ST13) (1 of 3)	0	135.433	38	12	113	6	6	403	43.5	5.01	325.92	12	0.757	0.453	0.977	0.836171	0.147279	1	95	125.5	56.8	122.7	35.22	28.99	15.35	13.51	3.30987e+07	5.73684e+07	7.02541e+07	6.82997e+07	7.58144e+07	1.14923e+08	3.43288e+07	3.41872e+07	4.4252e+07	8.38998e+07	6.39176e+07	7.40874e+07	High	High	High	High	High	High	High
FALSE	High	Master Protein	Glyma.05G199200.1.p	K08054 - calnexin (CANX) (1 of 3)	0	135.297	36	17	77	4	4	541	61.6	4.91	185.1	17	2.44	0.429	2.335	1	1	0.626448	157.3	64.5	27.6	150.6	59.45	72.67	20.33	48.28	3.15727e+06	6.89674e+06	1.17881e+07	2.82685e+06	921075	5.28655e+06	1.20608e+06	1.21192e+06	1.69133e+06	4.31705e+06	1.13393e+07	6.60138e+06	Peak Found	High	High	High	High	High	High
FALSE	High	Master Protein	Glyma.10G014700.1.p	K09584 - protein disulfide-isomerase A6 (PDIA6, TXNDC7) (1 of 6)	0	135.165	45	16	137	5	5	364	40.3	5.92	474.9	16	4.635	1.17	3.816	1	1	0.884349	174.6	37.7	44.1	143.7	83.13	46.42	103.56	53.55	2.40385e+07	1.92063e+08	3.2064e+08	3.58229e+07	4.14397e+07	8.06813e+07	4.84988e+07	4.23767e+07	2.4795e+08	9.5159e+07	1.5813e+08	2.8331e+08	High	High	High	High	High	High	High
FALSE	High	Master Protein	Glyma.14G207600.1.p	PTHR11911 - INOSINE-5-MONOPHOSPHATE DEHYDROGENASE RELATED (1 of 11)	0	135.163	51	12	110	3	3	205	22.7	8.65	314.4	12	1.545	1.895	1.612	0.839057	0.265416	0.394808	102.1	66.1	125.3	106.5	10.63	38.87	16.17	12.28	4.81805e+07	5.41111e+07	4.38012e+07	3.11904e+07	4.64266e+07	2.1034e+07	4.78475e+07	6.64001e+07	5.91036e+07	5.85515e+07	5.02703e+07	4.60941e+07	Peak Found	High	High	High	High	Peak Found	High
FALSE	High	Master Protein	Glyma.08G185800.1.p	PF04755 - PAP_fibrillin (PAP_fibrillin) (1 of 23)	0	135.029	58	15	134	0	3	242	27.2	9.42	438.7	15	3.087	1.852	3.88	0.212699	1	0.0300777	125.8	40.7	75.4	158.1	38	7.58	34.33	13.58	9.59188e+06	1.77888e+07	2.18213e+07	6.50039e+06	5.76268e+06	5.67465e+06	5.42923e+06	1.06707e+07	1.08741e+07	2.18771e+07	2.23615e+07	2.77472e+07	High	High	High	High	High	Peak Found	High
FALSE	High	Master Protein	Glyma.03G027500.1.p	K00615 - transketolase (E2.2.1.1, tktA, tktB) (1 of 4)	0	134.951	20	13	183	5	5	731	78.9	6.87	500.87	13	0.942	0.82	0.705	1	0.732914	0.525729	108.6	115.4	94.7	81.3	15.67	8.84	25.73	8.22	1.9575e+07	1.92886e+07	1.45999e+07	2.04836e+07	1.77682e+07	2.10325e+07	1.6805e+07	1.05902e+07	1.7683e+07	1.28967e+07	1.44395e+07	1.51801e+07	High	High	Peak Found	High	High	Not Found	High
FALSE	High	Master Protein	Glyma.17G047200.1.p	PTHR10772:SF0 - 20 KDA CHAPERONIN, CHLOROPLASTIC (1 of 4)	0	134.925	66	14	123	0	3	201	21.2	6	361.11	14	0.297	0.462	1.31	0.031218	0.097103	1	38.7	130.4	60.2	170.7	18.46	48.57	7.69	26.13	7.59959e+06	9.32718e+06	6.4681e+06	2.56085e+07	2.41637e+07	5.39444e+07	1.18281e+07	1.30102e+07	1.11906e+07	2.30067e+07	3.95416e+07	3.35362e+07	High	High	High	High	High	High	Not Found
FALSE	High	Master Protein	Glyma.11G237500.3.p	K12875 - apoptotic chromatin condensation inducer in the nucleus (ACIN1, ACINUS) (1 of 2)	0	134.472	45	28	104	1	11	705	77.8	4.88	238.84	28	1.191	1.011	1.88	1	1	0.625957	93.7	78.7	79.6	148	28.64	33.61	30.19	10.78	3.5739e+07	3.5079e+07	5.64483e+07	3.00044e+07	2.68669e+07	4.87538e+07	2.13217e+07	3.03408e+07	3.97116e+07	5.64114e+07	4.73286e+07	5.81603e+07	High	Peak Found	High	High	High	High	High
FALSE	High	Master Protein	Glyma.01G015100.1.p	PTHR31906:SF5 - PLASTID-LIPID-ASSOCIATED PROTEIN 3, CHLOROPLASTIC-RELATED (1 of 3)	0	134.299	37	12	160	9	12	370	39.6	4.69	510.08	12	1.371	1.463	0.769	1	1	1	119.1	86.9	127.2	66.8	50.63	27.21	69.65	96.33	3.03419e+08	4.17011e+08	7.90892e+08	3.31964e+08	3.0419e+08	1.90471e+08	2.77884e+08	4.45161e+08	1.0664e+09	2.33973e+08	9.24812e+08	1.57506e+08	High	High	High	High	High	High	High
FALSE	High	Master Protein	Glyma.19G038400.1.p	1.1.1.44 - Phosphogluconate dehydrogenase (NADP(+)-dependent, decarboxylating) / Phosphogluconic acid dehydrogenase (1 of 5)	0	133.856	36	17	113	0	9	537	59.3	8.06	275.02	17	1.403	0.845	0.867	1	1	1	136.3	97.2	82.2	84.3	8.02	17.32	24.87	20.24	3.30261e+07	2.92577e+07	3.41931e+07	2.026e+07	2.85542e+07	2.35445e+07	1.98149e+07	1.99033e+07	2.98457e+07	1.6535e+07	2.48718e+07	2.04151e+07	High	High	High	High	High	Peak Found	High
FALSE	High	Master Protein	Glyma.14G017100.1.p	PTHR23344:SF8 - GLYCEROPHOSPHODIESTER PHOSPHODIESTERASE-LIKE PROTEIN-RELATED (1 of 8)	0	133.846	31	17	156	9	9	754	81.7	6.02	460.71	17	1.111	0.551	0.67	1	0.477988	0.786207	133.4	120.1	66.2	80.4	3.6	10.33	36.71	25.13	1.30904e+08	1.26718e+08	1.21816e+08	1.17306e+08	1.1408e+08	9.63405e+07	4.95754e+07	6.28607e+07	9.9672e+07	7.64027e+07	1.01903e+08	6.21516e+07	High	High	High	High	High	High	High
FALSE	High	Master Protein	Glyma.20G240300.1.p	PTHR11260:SF171 - GLUTATHIONE S-TRANSFERASE DHAR3, CHLOROPLASTIC (1 of 4)	0	133.831	69	12	123	7	7	213	23.5	6.21	406.16	12	0.845	0.688	1.877	1	1	0.96798	76.7	90.7	62.4	170.2	44.53	24.02	71.45	34.29	4.43361e+07	4.48276e+07	9.08613e+07	5.62072e+07	5.30225e+07	3.48279e+07	3.55119e+07	3.6476e+07	1.11801e+08	5.05253e+07	1.00856e+08	9.95206e+07	High	High	High	High	High	High	High
FALSE	High	Master Protein	Glyma.03G219500.1.p	PTHR11731:SF117 - GLUTAMYL ENDOPEPTIDASE, CHLOROPLASTIC-RELATED (1 of 2)	0	133.81	20	14	81	1	14	954	106.1	6.2	216.75	14	0.888	0.782	0.245	1	1	0.0128761	121.9	137.2	107.3	33.6	5.87	24.57	36.98	10.63	6.16703e+07	5.74386e+07	5.49278e+07	6.46857e+07	6.75796e+07	4.15985e+07	4.00463e+07	5.05612e+07	8.07323e+07	1.5853e+07	1.7309e+07	1.39778e+07	High	High	High	High	High	Peak Found	High
FALSE	High	Master Protein	Glyma.03G107700.1.p	PTHR24012:SF493 - RNA-BINDING PROTEIN 28 (1 of 4)	0	133.643	35	19	52	8	9	816	90.3	5.3	138.34	19	7.896	3.374	3.119	0.158222	1	0.615183	205.3	26	87.7	81.1	22.49	38.69	65.77	35.88	2.47748e+08	1.5625e+08	2.0795e+08	2.63345e+07	2.56592e+07	4.84224e+07	2.21806e+07	8.88434e+07	1.23147e+08	5.60092e+07	1.16784e+08	8.21335e+07	Peak Found	Peak Found	Peak Found	Peak Found	Peak Found	High	High
FALSE	High	Master Protein	Glyma.15G047000.1.p	PF04755 - PAP_fibrillin (PAP_fibrillin) (1 of 23)	0	133.515	59	15	136	3	3	245	27.7	9.36	438.86	15	1.309	1.386	1.167	1	1	1	107.7	82.3	114	96	21.81	17.27	11.73	44.76	2.45936e+07	2.76791e+07	3.70648e+07	2.11454e+07	2.43592e+07	1.71577e+07	2.50364e+07	2.93125e+07	3.16745e+07	2.4683e+07	2.99275e+07	1.09763e+07	High	High	High	High	High	High	High
FALSE	High	Master Protein	Glyma.09G153300.1.p	PTHR11638//PTHR11638:SF105 - ATP-DEPENDENT CLP PROTEASE // SUBFAMILY NOT NAMED (1 of 5)	0	133.381	50	11	122	1	1	252	27.4	9.07	358.03	11	0.098	0.488	0.505	0.212699	1	0.963913	18.7	191.4	93.3	96.6	60.09	49.49	48.71	46.43	2.33164e+06	1.68444e+06	5.1318e+06	8.58936e+06	2.67882e+07	2.38456e+07	1.16286e+07	5.03874e+06	1.52697e+07	4.49792e+06	1.2037e+07	1.25096e+07	High	Peak Found	High	High	High	Peak Found	Not Found
FALSE	High	Master Protein	Glyma.03G253500.1.p	K09839 - violaxanthin de-epoxidase (VDE, NPQ1) (1 of 2)	0	133.373	32	17	116	0	7	498	56.6	7.03	338.69	17	0.767	0.672	1.021	1	0.492316	1	88.7	115.6	77.7	118.1	6.61	2.11	17.44	32.77	4.12301e+07	3.97239e+07	3.61984e+07	5.32944e+07	5.11605e+07	5.17826e+07	4.17126e+07	3.47912e+07	2.94294e+07	7.35512e+07	3.78175e+07	5.28859e+07	High	High	High	High	High	High	High
FALSE	High	Master Protein	Glyma.18G195900.1.p	K01962 - acetyl-CoA carboxylase carboxyl transferase subunit alpha (accA) (1 of 3)	0	133.138	37	19	86	4	5	690	76.9	8.51	233.38	19	2.113	0.842	1.06	1	1	1	168.5	79.8	67.2	84.5	26.71	18.12	85.9	65.98	4.69977e+06	6.90225e+06	8.18197e+06	2.94897e+06	4.15745e+06	3.26673e+06	2.75169e+06	429478	5.2648e+06	659423	3.94545e+06	3.46288e+06	High	High	High	High	High	High	High
FALSE	High	Master Protein	Glyma.15G007700.1.p	PTHR33729:SF1 - METHYL-CPG-BINDING DOMAIN-CONTAINING PROTEIN 10 (1 of 2)	0	132.942	45	13	107	8	8	275	30.3	4.64	374.28	13	2.181	2.601	4.726	1	1	0.593571	83	38.1	99	179.9	97.6	88.72	71.76	46.04	2.90948e+07	7.9302e+07	2.53355e+08	2.22283e+07	3.63579e+07	1.19899e+08	9.45827e+07	6.89952e+07	2.52903e+08	1.32857e+08	1.71835e+08	3.13036e+08	High	High	High	High	High	High	High
FALSE	High	Master Protein	Glyma.12G219300.1.p	K08914 - light-harvesting complex II chlorophyll a/b binding protein 3 (LHCB3) (1 of 2)	0	132.777	54	8	220	0	7	268	28.8	5.27	714.35	8	0.635	0.467	0.244	1	1	1	108.3	170.4	79.6	41.6	55.82	78	44.63	50.24	1.76728e+09	1.27144e+09	4.72464e+08	2.00086e+09	2.43105e+09	1.74977e+08	9.34859e+08	1.44353e+09	5.7017e+08	4.88587e+08	5.33747e+08	1.6807e+08	High	High	High	High	High	High	High
FALSE	High	Master Protein	Glyma.09G096800.1.p	PTHR23359:SF72 - ADENYLATE KINASE FAMILY PROTEIN (1 of 3)	0	132.652	34	19	102	0	5	597	66.8	8.02	230.01	19	1.149	1.844	1.138	1	1	1	89.6	78	143.7	88.7	104.46	63.79	85.5	60.01	1.15736e+07	1.13931e+07	6.38246e+07	9.916e+06	1.00694e+07	2.7469e+07	1.85653e+07	1.27051e+07	6.07965e+07	1.14585e+07	3.04654e+06	1.38366e+07	High	High	Peak Found	Peak Found	High	Peak Found	High
FALSE	High	Master Protein	Glyma.12G231900.1.p	K02109 - F-type H+-transporting ATPase subunit b (ATPF0B, atpF) (1 of 3)	0	132.509	72	14	149	13	14	127	14.8	8.72	387.43	14	1.36	1.013	0.344	1	1	0.880216	146.4	107.6	109	37	18.01	51.45	31.09	71.91	9.31993e+08	6.72546e+08	9.42579e+08	8.18076e+08	6.85157e+08	2.45158e+08	6.94208e+08	6.26482e+08	1.08882e+09	2.35746e+08	5.64223e+08	1.35521e+08	High	High	High	High	High	High	High
FALSE	High	Master Protein	Glyma.05G213800.1.p	K02150 - V-type H+-transporting ATPase subunit E (ATPeV1E, ATP6E) (1 of 7)	0	132.015	54	13	110	0	2	232	26.7	6.44	327.99	13	0.274	0.01	1.558	0.0437965		0.60121	38.7	141.3		220.1	2.58	31.43		34.98	2.28178e+06	2.27848e+06	2.38332e+06	8.33281e+06	6.95698e+06	1.25545e+07				1.2981e+07	9.93896e+06	1.96421e+07	High	High	Not Found	High	High	High	Not Found
FALSE	High	Master Protein	Glyma.10G291200.1.p	PTHR13748//PTHR13748:SF43 - COBW-RELATED // SUBFAMILY NOT NAMED (1 of 2)	0	131.874	36	13	123	2	2	446	49.6	6.27	384	13	1.059	1.961	1.273	1	1	1	80.1	75.6	148.2	96.2	40.06	12.87	39.6	25.66	2.31946e+07	2.44059e+07	1.04228e+07	2.18967e+07	2.65237e+07	2.09683e+07	2.01866e+07	4.73796e+07	4.29294e+07	3.46923e+07	2.04861e+07	2.78724e+07	High	High	High	High	High	High	High
FALSE	High	Master Protein	Glyma.09G022400.1.p	PTHR31388:SF22 - PEROXIDASE 22-RELATED (1 of 14)	0	131.269	30	9	135	4	8	355	38.5	6.04	446.53	9	0.913	1.068	2.533	1	1	0.92085	66.2	72.5	77.5	183.8	85.1	69.41	60.75	28.4	1.12647e+08	1.56373e+08	5.20635e+08	1.71233e+08	1.37437e+08	4.61618e+08	1.82856e+08	1.23782e+08	3.93499e+08	6.43934e+08	4.33781e+08	3.83102e+08	High	High	High	High	High	High	High
FALSE	High	Master Protein	Glyma.18G196000.1.p	K01962 - acetyl-CoA carboxylase carboxyl transferase subunit alpha (accA) (1 of 3)	0	131.175	38	19	79	4	5	683	75.9	8.81	218.4	19	3.23	2.849	1.529	0.360061	0.305548	0.892391	150.1	46.5	132.4	71.1	53.68	11.25	33.86	24.12	6.77303e+06	3.12986e+06	1.03933e+07	2.09713e+06	1.94439e+06	2.41887e+06	5.97513e+06	3.74735e+06	7.65844e+06	4.53022e+06	2.92446e+06	3.20724e+06	Peak Found	Peak Found	High	Peak Found	Not Found	Not Found	High
FALSE	High	Master Protein	Glyma.20G170700.1.p	K15306 - Ran-binding protein 1 (RANBP1) (1 of 3)	0	130.913	37	7	97	4	4	223	24.7	4.86	366.09	7	3.432	0.87	6.782	1	1	0.928371	113.6	33.1	28.8	224.5	56.43	122.07	127.99	46.29	1.03381e+08	1.13194e+08	2.64913e+08	3.29773e+07	2.26419e+07	2.26305e+08	2.58682e+07	2.86844e+07	2.5884e+08	9.89661e+07	2.81227e+08	2.23658e+08	High	High	High	High	High	High	High
FALSE	High	Master Protein	Glyma.01G081300.1.p	3.2.1.177 - Alpha-D-xyloside xylohydrolase / Alpha-xylosidase (1 of 3)	0	130.874	25	19	161	6	6	928	102.9	6.7	380.89	19	1.092	1.421	0.549	1	1	0.743878	107.6	98.5	139.9	54	15.85	27.48	38.6	37.15	2.0048e+08	1.90725e+08	1.47079e+08	1.74634e+08	1.81537e+08	1.05133e+08	2.48088e+08	1.34415e+08	3.10181e+08	1.25705e+08	9.57908e+07	5.69366e+07	High	High	High	High	High	High	High
FALSE	High	Master Protein	Glyma.03G247000.1.p	K10046 - GDP-D-mannose 3', 5'-epimerase (GME) (1 of 5)	0	130.87	41	16	128	0	6	379	42.8	6.39	325.27	16	1.165	0.75	0.513	1	1	0.293861	135.9	116.7	87.6	59.8	18.78	13.72	41.9	33.22	8.69386e+07	7.85659e+07	5.94611e+07	7.33287e+07	6.74408e+07	5.56792e+07	5.06076e+07	7.61995e+07	3.20193e+07	2.055e+07	4.15794e+07	3.45687e+07	High	High	High	High	High	Peak Found	High
FALSE	High	Master Protein	Glyma.19G172500.1.p	K11254 - histone H4 (H4) (1 of 20)	0	130.805	35	9	187	0	2	156	17.9	11.36	541.89	9	1.263	1.21	0.117	1	1	1	140.8	111.4	134.8	13	78.73	79.56	86.34	32.85	1.13599e+09	1.39514e+09	9.3725e+07	8.99117e+08	1.2978e+09	1.01046e+08	1.8621e+09	1.08783e+09	1.06764e+08	1.7479e+08	1.00481e+08	1.05038e+08	High	High	High	High	High	High	High
FALSE	High	Master Protein	Glyma.03G119500.1.p	1.14.13.81 - Magnesium-protoporphyrin IX monomethyl ester (oxidative) cyclase / Mg-protoporphyrin IX monomethyl ester oxidative cyclase (1 of 2)	0	130.8	40	15	85	1	1	424	49	8.22	254.28	15	0.87	0.83	0.847	1	1	1	98.1	112.8	93.6	95.5	25.18	7.5	46.8	51.53	8.7075e+06	5.57346e+06	9.21299e+06	1.13641e+07	1.00121e+07	9.99859e+06	8.31174e+06	3997450	1.13383e+07	4.11938e+06	8.48047e+06	1.28681e+07	High	High	Not Found	High	High	Not Found	High
FALSE	High	Master Protein	Glyma.17G239000.1.p	PTHR12411//PTHR12411:SF352 - CYSTEINE PROTEASE FAMILY C1-RELATED // SUBFAMILY NOT NAMED (1 of 3)	0	130.542	27	14	145	0	3	476	52.1	5.81	461.1	14	1.083	0.898	1.162	1	1	1	104.5	96.6	86.7	112.2	48.13	13.36	28.36	25.73	1.63467e+08	1.47321e+08	5.47722e+07	1.22055e+08	1.58855e+08	1.36067e+08	1.12146e+08	185347346	1.22207e+08	1.58104e+08	1.82384e+08	1.07146e+08	High	High	High	High	High	High	High
FALSE	High	Master Protein	Glyma.18G019700.1.p	K12875 - apoptotic chromatin condensation inducer in the nucleus (ACIN1, ACINUS) (1 of 2)	0	130.399	41	24	96	7	7	708	78	4.74	222.66	24	1.656	1.339	1.319	1	1	1	124.7	75.3	100.8	99.3	67.38	44.08	22.37	38.64	3.47633e+07	4.38879e+07	1.13751e+08	2.64961e+07	2.55888e+07	5.26937e+07	3.54895e+07	2.46767e+07	3.87796e+07	3.233e+07	6.25051e+07	3.49508e+07	High	High	High	High	High	High	High
FALSE	High	Master Protein	Glyma.02G238700.2.p	PTHR11911 - INOSINE-5-MONOPHOSPHATE DEHYDROGENASE RELATED (1 of 11)	0	130.297	51	11	105	2	2	205	22.7	8.66	311.74	11	1.214	0.926	1.212	1	1	0.871799	111.6	91.9	85.1	111.4	30.93	7.17	38.38	23.71	4.92766e+07	4.82111e+07	8.05235e+07	4.05999e+07	4.15408e+07	3.62379e+07	3.12817e+07	3.75994e+07	6.31863e+07	4.88443e+07	7.23391e+07	4.91936e+07	High	High	High	High	High	Peak Found	High
FALSE	High	Master Protein	Glyma.04G012300.1.p	PTHR10366//PTHR10366:SF375 - NAD DEPENDENT EPIMERASE/DEHYDRATASE // SUBFAMILY NOT NAMED (1 of 14)	0	130.283	60	13	81	5	12	310	33.9	5.88	250.01	13	1.645	0.809	1.308	1	1	1	138.2	84	68	109.9	31.28	17.22	52.07	49.82	2.38651e+08	1.29243e+08	1.66065e+08	1.00947e+08	1.1519e+08	8.11954e+07	7.12871e+07	1.74531e+08	8.16764e+07	1.32089e+08	6.20764e+07	1.89182e+08	High	High	High	High	High	Peak Found	High
FALSE	High	Master Protein	Glyma.17G128300.1.p	PTHR23359//PTHR23359:SF99 - NUCLEOTIDE KINASE // SUBFAMILY NOT NAMED (1 of 5)	0	130.014	62	15	162	0	1	242	26.6	7.81	479.34	15	1.581	1.887	1.896	1	0.498933	0.996615	99.4	62.9	118.6	119.2	35.57	41.27	44.05	54.97	3.51239e+08	3.23421e+08	5.97473e+08	2.22216e+08	2.62299e+08	1.05933e+08	3.95894e+08	4.19237e+08	8.23882e+08	4.21338e+08	5.41478e+08	1.45415e+08	Peak Found	Peak Found	High	High	High	High	High
FALSE	High	Master Protein	Glyma.19G125400.1.p	K03626 - nascent polypeptide-associated complex subunit alpha (EGD2, NACA) (1 of 8)	0	129.682	77	8	105	4	4	202	22	4.55	381.25	8	0.483	0.328	0.887	1	0.377679	1	71.6	148.2	48.7	131.5	42.03	22.36	78.01	9.46	3.19027e+07	5.60218e+07	2.58934e+07	5.50034e+07	8.53881e+07	6.60185e+07	2.16749e+07	5.18719e+07	9.82568e+06	5.11358e+07	5.85513e+07	6.16519e+07	High	High	Peak Found	High	High	High	High
FALSE	High	Master Protein	Glyma.16G087700.1.p	K02995 - small subunit ribosomal protein S8e (RP-S8e, RPS8) (1 of 6)	0	129.183	47	12	94	4	4	219	24.8	10.42	306.21	12	1.579	1.827	2.087	1	0.605084	0.957849	97.3	61.6	112.5	128.6	77.29	4.46	85.57	25.62	3.03997e+07	3.50067e+07	1.11585e+08	2.05946e+07	2.23596e+07	2.21663e+07	4.04873e+07	3.74201e+07	1.52999e+08	3.05587e+07	4.62594e+07	5.16942e+07	High	High	Peak Found	High	High	Not Found	High
FALSE	High	Master Protein	Glyma.14G003200.1.p	1.3.3.3 - Coproporphyrinogen oxidase / Coproporphyrinogenase (1 of 1)	0	129.052	49	14	116	1	14	385	43.2	6.95	273.91	14	1.089	0.938	0.432	1	1	0.0944458	125.9	115.6	108.5	49.9	21.61	4.84	25.54	26.13	1.96122e+08	1.99253e+08	1.31943e+08	1.80326e+08	1.80066e+08	1.655e+08	1.68967e+08	1.82757e+08	1.08977e+08	6.61997e+07	1.08772e+08	7.77803e+07	High	High	High	High	High	High	High
FALSE	High	Master Protein	Glyma.08G031800.1.p	K01412 - mitochondrial-processing peptidase subunit alpha [EC:3.4.24.64] (PMPCA, MAS2) (1 of 6)	0	128.901	47	15	83	5	5	509	54.8	5.77	203.73	15	22.099	7.466	52.187	0.482765	1	0.0647123	106.8	4.8	36.1	252.3	88.14	35.62	89.6	8.6	2.25301e+07	3.18856e+06	4.43146e+07	1.80289e+06	1.01951e+06	1.00999e+06	7.61165e+06	935231	1.49868e+07	4.91987e+07	5.83904e+07	5.32048e+07	High	High	High	High	High	Not Found	Not Found
FALSE	High	Master Protein	Glyma.01G227400.1.p	PTHR11557:SF0 - PORPHOBILINOGEN DEAMINASE (1 of 1)	0	128.79	44	13	112	5	10	356	38.5	6.79	320.36	13	0.861	0.342	0.632	1	1	1	121.4	141.1	48.3	89.2	15.38	57.9	52.4	8.72	1.93665e+08	1.97312e+08	1.47769e+08	2.40849e+08	2.25049e+08	5.82555e+07	6.43394e+07	1.61681e+08	7.69898e+07	1.42279e+08	1.26268e+08	1.50163e+08	High	High	High	High	High	High	High
FALSE	High	Master Protein	Glyma.11G053700.1.p	PTHR11911//PTHR11911:SF109 - INOSINE-5-MONOPHOSPHATE DEHYDROGENASE RELATED // SUBFAMILY NOT NAMED (1 of 4)	0	128.476	54	11	170	1	1	228	25.1	8.38	480.57	11	0.264	0.476	0.738	0.00598592	0.0318628	0.377464	42.7	161.4	76.9	119.1	14.58	21.7	18.67	11.14	2.83562e+06	2.55221e+06	3.39106e+06	1.07266e+07	8.85139e+06	1.36168e+07	4.02467e+06	5885588	5.11077e+06	6.52962e+06	7.91382e+06	8.02829e+06	High	High	Peak Found	High	High	High	High
FALSE	High	Master Protein	Glyma.15G144800.1.p	PTHR23316:SF22 - ARMADILLO/BETA-CATENIN-LIKE REPEATS-CONTAINING PROTEIN-RELATED (1 of 4)	0	128.2	28	10	75	1	1	531	58.6	5.26	234.8	10	0.844	1.149	4.318	1	1	0.2685	46.2	54.7	62.9	236.2	49.99	17.29	101.97	8.06	1.06265e+06	1.84175e+06	3.02513e+06	2.18238e+06	1.67672e+06	2.37088e+06	971796	2.50723e+06	8.91282e+06	9.42296e+06	9.09076e+06	1.05794e+07	High	High	Peak Found	High	High	Peak Found	Peak Found
FALSE	High	Master Protein	Glyma.05G056300.1.p	PTHR31953:SF17 - ACID BETA-FRUCTOFURANOSIDASE 3, VACUOLAR-RELATED (1 of 4)	0	128.099	29	16	99	0	7	645	71.7	6	309.71	16	0.781	0.682	1.8	1	0.162474	0.0475821	73.3	93.8	64	168.9	13.59	21.51	10.95	1.06	2.18257e+07	2.24364e+07	2.77566e+07	2.87196e+07	2.42983e+07	3.70165e+07	1.95785e+07	1.74073e+07	2.16892e+07	5.19312e+07	5.16904e+07	5.08906e+07	High	High	High	High	High	High	Peak Found
FALSE	High	Master Protein	Glyma.05G074400.1.p	K00413 - ubiquinol-cytochrome c reductase cytochrome c1 subunit (CYC1, CYT1, petC) (1 of 4)	0	127.994	45	9	58	0	2	308	33.9	7.21	193.02	9																											High	Not Found	Not Found	High	High	Not Found	Not Found
FALSE	High	Master Protein	Glyma.14G085800.1.p	PTHR12411//PTHR12411:SF352 - CYSTEINE PROTEASE FAMILY C1-RELATED // SUBFAMILY NOT NAMED (1 of 3)	0	127.763	25	13	145	2	2	496	54.4	6.02	466.7	13	0.898	0.537	0.917	1	1	1	107.2	119.3	64.1	109.4	80.93	31.55	84.96	76.13	1.17367e+08	8.82654e+07	6.80623e+06	8.68416e+07	9.82545e+07	1.53417e+08	5.27478e+07	9.65827e+07	7.6671e+06	1.12869e+08	9.99012e+06	9.00762e+07	High	High	High	High	High	High	High
FALSE	High	Master Protein	Glyma.05G152100.2.p	PTHR11680//PTHR11680:SF11 - SERINE HYDROXYMETHYLTRANSFERASE // SUBFAMILY NOT NAMED (1 of 1)	0	127.564	40	17	90	0	1	471	51.7	7.31	249.58	17																											High	High	Not Found	Not Found	Not Found	Not Found	Not Found
FALSE	High	Master Protein	Glyma.12G046000.1.p	1.17.1.2 - 4-hydroxy-3-methylbut-2-enyl diphosphate reductase / HMBPP reductase (1 of 2)	0	127.122	38	17	99	0	5	462	52.1	5.44	267.67	17	1.271	0.822	1.058	1	1	1	122.5	96.4	79.2	102	18.52	6.19	40.61	33.84	1.91306e+07	2.56103e+07	2.77102e+07	2.07563e+07	1.84008e+07	2.01562e+07	8.65636e+06	1.65608e+07	2.10126e+07	1.40085e+07	2.83788e+07	2.13208e+07	High	High	High	High	High	Peak Found	High
FALSE	High	Master Protein	Glyma.04G098600.1.p	KOG0105//KOG0106//KOG0114//KOG0130//KOG0131//KOG0144 - Alternative splicing factor ASF/SF2 (RRM superfamily) // Alternative splicing factor SRp55/B52/SRp75 (RRM superfamily) // Predicted RNA-binding protein (RRM superfamily) // RNA-binding protein RBM8/Tsunagi (RRM superfamily) // Splicing factor 3b, subunit 4 // RNA-binding protein CUGBP1/BRUNO (RRM superfamily) (1 of 1)	0	126.881	52	13	97	6	6	297	33	7.53	282.52	13	1.114	0.761	0.128	1	1	0.753789	148.4	133.2	101.3	17.1	13.38	74.69	85.71	60.6	5.40367e+08	6.94802e+08	5.76533e+08	5.17742e+08	6.41698e+08	6.34131e+07	3.93777e+08	5.88066e+08	2.30063e+07	8.38871e+07	6.64312e+07	1.81742e+07	High	High	Peak Found	High	High	High	High
FALSE	High	Master Protein	Glyma.09G187800.1.p	PTHR23264:SF29 - PROTEIN HIGH CHLOROPHYLL FLUORESCENCE 101 (1 of 2)	0	126.834	34	16	111	0	16	530	57.8	5.76	259.6	16	0.69	0.839	0.542	1	1	0.346986	89.9	130.3	109.3	70.6	33.63	10.71	22.79	24.11	8.97796e+07	9.83257e+07	1.61537e+08	1.57287e+08	1.26843e+08	1.42468e+08	1.19471e+08	9.85202e+07	1.54533e+08	6.93304e+07	1.08018e+08	7.7149e+07	High	High	High	High	High	High	High
FALSE	High	Master Protein	Glyma.16G001900.1.p	K03233 - elongation factor 1-gamma (EEF1G) (1 of 4)	0	126.698	32	12	99	2	2	419	47.6	6.24	269.85	12	0.697	0.867	0.303	1	1	0.134321	97.3	139.5	120.9	42.3	29.05	8.75	28.14	55.58	1.20868e+07	7.70669e+06	7.37354e+06	1.00832e+07	1.10542e+07	1.20168e+07	9.58029e+06	5.7832e+06	1.02259e+07	3.35048e+06	6.94185e+06	2.47791e+06	High	High	Peak Found	High	High	Not Found	High
FALSE	High	Master Protein	Glyma.05G161000.1.p	PTHR13194:SF19 - NAD(P)-BINDING ROSSMANN-FOLD SUPERFAMILY PROTEIN (1 of 2)	0	126.573	33	18	99	0	5	601	66.3	8.41	254.1	18	0.62	0.517	0.726	1	0.234429	1	86.6	139.7	72.3	101.5	26.07	30.13	29.33	24	1.75386e+07	1.66412e+07	2.61339e+07	2.83099e+07	2.04388e+07	3.77973e+07	8.9512e+06	1.46428e+07	1.64552e+07	2.79615e+07	1.76974e+07	2.05604e+07	High	High	Peak Found	High	High	Peak Found	High
FALSE	High	Master Protein	Glyma.01G081500.1.p	K10839 - UV excision repair protein RAD23 (RAD23, HR23) (1 of 8)	0	126.355	40	10	80	3	3	392	41.2	4.84	260.94	10	3.071	2.827	11.876	1	1	0.313361	65.4	21.3	60.2	253	70.66	124.14	47.84	13.2	9.07708e+06	7.55192e+06	2.54177e+07	2.61356e+06	2.9561e+06	2.39163e+07	5.99038e+06	8.35667e+06	1.50231e+07	3.51079e+07	2.81306e+07	3.6187e+07	High	High	High	High	High	High	High
FALSE	High	Master Protein	Glyma.01G188500.1.p	PTHR11911//PTHR11911:SF109 - INOSINE-5-MONOPHOSPHATE DEHYDROGENASE RELATED // SUBFAMILY NOT NAMED (1 of 4)	0	126.346	54	11	172	0	1	228	25.2	8.66	478.11	11	0.525	0.685	0.938	1	1	1	66.7	127.1	87.1	119.1	14.92	66.65	51.74	10.89	5.90717e+06	7.01522e+06	7.98601e+06	7.30379e+06	1.33641e+07	2.85214e+07	4.43198e+06	1.3922e+07	9.16086e+06	1.23105e+07	1.25298e+07	1.49121e+07	High	High	Peak Found	High	High	High	High
FALSE	High	Master Protein	Glyma.02G007700.1.p	K03070 - preprotein translocase subunit SecA (secA) (1 of 3)	0	126.312	25	20	72	2	2	1010	114.1	6.9	171.77	20																											High	High	Not Found	Not Found	High	Not Found	Not Found
FALSE	High	Master Protein	Glyma.02G263200.1.p	K02987 - small subunit ribosomal protein S4e (RP-S4e, RPS4) (1 of 6)	0	126.265	54	15	117	1	6	264	29.9	10.26	319.99	15	1.069	0.771	0.519	1	1	1	127.2	119.1	91.9	61.8	13.37	29.38	26.45	53.46	6.77737e+07	8.26836e+07	8.839e+07	7.74683e+07	7.73651e+07	4.37297e+07	5.96865e+07	7.74822e+07	4.53605e+07	4.01804e+07	8.0203e+07	2.95363e+07	High	High	High	High	High	High	High
FALSE	High	Master Protein	Glyma.19G123800.1.p	1.14.13.81 - Magnesium-protoporphyrin IX monomethyl ester (oxidative) cyclase / Mg-protoporphyrin IX monomethyl ester oxidative cyclase (1 of 2)	0	126.226	40	15	84	1	1	424	49	7.75	239.03	15	0.788	0.387	1.068	1	1	1	97.2	123.4	47.7	131.7	29.54	58.81	93.32	17.49	6.99601e+06	6.57913e+06	1.0955e+07	1.22561e+07	8.88117e+06	2.93556e+06	2.02213e+06	3.43574e+06	1.21194e+07	9.48102e+06	1.05899e+07	7.43034e+06	High	High	Peak Found	High	High	Peak Found	Peak Found
FALSE	High	Master Protein	Glyma.08G219100.1.p	PTHR31096:SF16 - ACT DOMAIN-CONTAINING PROTEIN (1 of 4)	0	125.899	44	10	163	2	5	294	31.9	5.66	501.63	10	1.197	0.873	0.731	1	1	1	126	105.3	91.8	76.9	18.87	17.9	72.29	30.61	5.58419e+07	8.10853e+07	6.55352e+07	5.47563e+07	4.6571e+07	6.64878e+07	3.23271e+07	4.77803e+07	1.24313e+08	4.00103e+07	5.51648e+07	2.98208e+07	High	High	High	High	High	High	High
FALSE	High	Master Protein	Glyma.10G242600.1.p	K13811 - 3'-phosphoadenosine 5'-phosphosulfate synthase (PAPSS) (1 of 3)	0	125.764	43	17	91	5	15	465	52.1	7.8	238.67	17	0.807	0.925	1.219	1	1	1	81.7	101.2	93.6	123.4	12.3	15.56	46.7	28.12	1.30631e+08	1.08118e+08	1.37648e+08	1.45051e+08	1.96254e+08	1.61918e+08	9.24624e+07	1.49747e+08	2.41819e+08	1.4118e+08	2.51866e+08	1.97427e+08	High	High	High	High	High	Peak Found	High
FALSE	High	Master Protein	Glyma.13G299200.1.p	K08902 - photosystem II Psb27 protein (psb27) (1 of 2)	0	125.395	38	7	142	2	2	169	18.6	9.94	509.98	7	0.899	0.524	7.126	1	0.489443	0.180473	37.7	41.9	21.9	298.5	25.75	106.39	10.9	12.94	9.35102e+06	1.57638e+07	1.22891e+07	1.36664e+07	1.20692e+07	7.42963e+07	7.16063e+06	8561947	7.09495e+06	1.19058e+08	9.45149e+07	9.73892e+07	High	High	Not Found	High	High	High	Not Found
FALSE	High	Master Protein	Glyma.03G262800.1.p	K03061 - 26S proteasome regulatory subunit T1 (PSMC2, RPT1) (1 of 5)	0	125.273	46	16	113	0	16	426	47.7	6.47	244.11	16	1.274	1.145	0.748	0.807002	1	1	122.3	96	109.9	71.8	8.99	13.37	12.2	25.22	1.40563e+08	1.5273e+08	1.68158e+08	1.19894e+08	1.21917e+08	9.49601e+07	1.17942e+08	1.50791e+08	1.37285e+08	7.45958e+07	1.2166e+08	8.96331e+07	High	High	High	High	High	High	High
FALSE	High	Master Protein	Glyma.04G255700.1.p	K12837 - splicing factor U2AF 65 kDa subunit (U2AF2) (1 of 3)	0	125.16	40	14	75	0	2	600	67.6	8.13	219.44	14	0.412	0.01	2.608	1		0.573562	41	99.5		259.5	61.53	78.52		15	871030	2.60828e+06	1.11073e+06	2.69907e+06	851442	5.60518e+06				7.03882e+06	7.61847e+06	5.6437e+06	High	High	Not Found	High	Peak Found	High	Not Found
FALSE	High	Master Protein	Glyma.12G200200.1.p	PTHR34793:SF1 - PROTEIN THYLAKOID FORMATION 1, CHLOROPLASTIC (1 of 4)	0	124.979	45	14	104	2	2	297	33.8	8.51	267.87	14	0.709	0.925	0.249	1	1	1	98.4	138.8	128.3	34.5	51.11	76.59	29.99	39.09	2.55632e+07	7.74544e+06	2.15244e+07	3.4045e+07	3.03663e+07	2.69947e+06	2.03606e+07	2.80781e+07	3.75167e+07	7.43969e+06	1.40526e+07	7.55484e+06	High	High	High	High	High	Peak Found	High
FALSE	High	Master Protein	Glyma.11G048200.1.p	PTHR11743:SF29 - MITOCHONDRIAL OUTER MEMBRANE PROTEIN PORIN 2-RELATED (1 of 2)	0	124.873	54	14	93	3	3	276	29.2	9.29	246.26	14	2.115	1.765	0.407	0.117669	0.247334	0.351333	160	75.7	133.5	30.8	20.59	40.68	18.48	11.92	9.66823e+06	1.0451e+07	1.40672e+07	5.46478e+06	4.94207e+06	2.26263e+06	6.91952e+06	8.72092e+06	1.00773e+07	1.87206e+06	2.35317e+06	2.01043e+06	High	High	Not Found	High	Peak Found	Peak Found	High
FALSE	High	Master Protein	Glyma.13G241300.1.p	PTHR10639:SF7 - CLATHRIN LIGHT CHAIN (1 of 4)	0	124.815	43	14	117	4	4	313	34.6	5.12	287.17	14	1.155	0.501	1.821	1	0.41531	0.415352	103.2	89.3	44.8	162.7	12.63	14.96	50.39	4.51	3.58026e+07	3.85776e+07	4.55998e+07	3.33996e+07	4.21229e+07	3.23126e+07	1.67459e+07	1.42211e+07	3.43632e+07	5.88152e+07	6.08151e+07	6.42843e+07	High	High	High	High	Peak Found	High	High
FALSE	High	Master Protein	Glyma.06G301500.1.p	PTHR31352:SF5 - BETA-AMYLASE 5-RELATED (1 of 5)	0	124.711	39	15	90	3	15	496	56	5.55	254	15	1.426	0.951	0.56	1	1	1	144.9	101.6	96.6	56.9	9.39	13.09	12.92	62.08	1.74874e+08	1.45206e+08	1.65872e+08	1.16295e+08	1.23742e+08	9.55e+07	9.49665e+07	1.10551e+08	1.23236e+08	6.50992e+07	1.70343e+08	6.22479e+07	High	High	High	High	High	Peak Found	High
FALSE	High	Master Protein	Glyma.06G236200.1.p	K02968 - small subunit ribosomal protein S20 (RP-S20, rpsT) (1 of 2)	0	124.642	30	10	172	5	5	179	19.8	10.46	594.56	10	0.248	0.243	0.611	0.934965	0.643215	1	47.2	190.3	46.3	116.3	27.77	58.58	50.26	35.83	9.56467e+07	1.43231e+08	8.72433e+07	1.11065e+08	3.85481e+08	4.75394e+08	9.37544e+07	1.78166e+08	6.92062e+07	2.37206e+08	1.14845e+08	2.35567e+08	High	High	Peak Found	High	High	High	High
FALSE	High	Master Protein	Glyma.08G115100.1.p	PTHR11588:SF48 - TUBULIN ALPHA-1 CHAIN-RELATED (1 of 5)	0	124.635	30	12	102	0	3	450	49.6	5.14	312.49	12	0.781	0.503	0.261	1	1	0.371378	122.8	157.1	79	41.1	4.81	17.27	43.23	81.8	5.71644e+07	5.50724e+07	5.19374e+07	8.32358e+07	5.8785e+07	7.04765e+07	3.54377e+07	3.51965e+07	7.05558e+07	1.84187e+07	6.32688e+07	1.59747e+07	High	High	High	High	High	High	High
FALSE	High	Master Protein	Glyma.01G040200.1.p	PTHR11260:SF193 - GLUTATHIONE S-TRANSFERASE U11-RELATED (1 of 7)	0	124.531	53	11	100	10	11	234	26.4	5.19	331.04	11	1.121	0.926	0.628	1	1	0.97106	122.1	108.8	100.8	68.3	15.9	43.6	39.14	33.45	3.52855e+08	4.45548e+08	3.33229e+08	3.1463e+08	3.69006e+08	1.39917e+08	2.01876e+08	4.43716e+08	2.91485e+08	2.06318e+08	1.97442e+08	1.04096e+08	High	High	High	High	High	Peak Found	High
FALSE	High	Master Protein	Glyma.14G134100.1.p	K01535 - H+-transporting ATPase (E3.6.3.6) (1 of 24)	0	124.248	24	18	74	0	4	951	104.6	7.21	191.08	18	1.178	0.889	1.433	1	1	0.80106	104.7	88.9	79	127.4	19.77	32.69	6.02	31.48	7.96261e+06	6.62814e+06	9.83216e+06	9.2243e+06	6.75704e+06	4.71922e+06	5.53026e+06	6227724	6.00808e+06	6.89192e+06	1.31131e+07	9.68544e+06	High	High	Peak Found	High	High	Peak Found	High
FALSE	High	Master Protein	Glyma.19G251000.1.p	K09839 - violaxanthin de-epoxidase (VDE, NPQ1) (1 of 2)	0	124.143	37	17	103	7	7	478	53.9	6.83	278.63	17	1.267	0.781	1.482	1	1	0.239144	111.9	88.3	69	130.9	7.58	32.97	35.16	26.47	6.32279e+07	5.50469e+07	6.26842e+07	5.02335e+07	4.94707e+07	2.59433e+07	3.86513e+07	3.27973e+07	6.24225e+07	7.33315e+07	1.11408e+08	7.13132e+07	High	High	High	High	High	High	High
FALSE	High	Master Protein	Glyma.14G048000.1.p	PTHR10795//PTHR10795:SF365 - PROPROTEIN CONVERTASE SUBTILISIN/KEXIN // SUBFAMILY NOT NAMED (1 of 8)	0	123.902	33	15	97	10	15	783	84	9.31	290.53	15	0.729	1.143	0.7	1	1	0.767546	81.7	112	128	78.4	21.93	31.56	20.51	15.96	7.96236e+07	1.16911e+08	8.36052e+07	1.62741e+08	1.14672e+08	8.69814e+07	1.63408e+08	1.08602e+08	1.31023e+08	9.9028e+07	7.3012e+07	8.026e+07	High	High	Peak Found	High	High	High	High
FALSE	High	Master Protein	Glyma.10G058100.1.p	1.1.1.41 - Isocitrate dehydrogenase (NAD(+)) / Nicotinamide adenine dinucleotide isocitrate dehydrogenase (1 of 6)	0	123.897	42	13	87	1	3	359	39.4	7.49	261.56	13	23.141	15.208	7.861	0.00096361	0.00135581	0.00356161	196.1	8.5	128.9	66.6	22.18	35.3	14.02	30.95	2.01492e+07	2.19092e+07	1.40116e+07	736262	870728	1.40659e+06	1.46957e+07	1.10739e+07	1.32423e+07	5.05035e+06	6.84483e+06	9.42609e+06	High	High	Peak Found	High	High	Peak Found	High
FALSE	High	Master Protein	Glyma.08G242100.1.p	PTHR11638:SF121 - CHAPERONE PROTEIN CLPB3, CHLOROPLASTIC (1 of 4)	0	123.843	26	22	104	0	4	974	109.7	6.77	230.99	22	0.072	0.179	1.576	0.116543	0.268508	1	10.1	141.5	25.4	223	46.49	34.46	86.47	33.46	7.67439e+06	5.86412e+06	1.39903e+07	5.68052e+07	1.16966e+08	1.07059e+08	5.58728e+06	1.92087e+07	4.53895e+07	1.07106e+08	2.16694e+08	1.68715e+08	Peak Found	High	Peak Found	Peak Found	High	Peak Found	High
FALSE	High	Master Protein	Glyma.16G062100.2.p	K00413 - ubiquinol-cytochrome c reductase cytochrome c1 subunit (CYC1, CYT1, petC) (1 of 4)	0	123.672	45	9	55	1	1	307	33.6	6.95	188.65	9																											High	Not Found	Not Found	Not Found	Not Found	Not Found	Not Found
FALSE	High	Master Protein	Glyma.01G017400.1.p	KOG0106//KOG0110//KOG0131//KOG0144//KOG0146 - Alternative splicing factor SRp55/B52/SRp75 (RRM superfamily) // RNA-binding protein (RRM superfamily) // Splicing factor 3b, subunit 4 // RNA-binding protein CUGBP1/BRUNO (RRM superfamily) // RNA-binding protein ETR-3 (RRM superfamily) (1 of 1)	0	123.58	45	11	76	4	4	289	31.7	6.58	278.02	11	0.961	0.823	1.432	1	1	1	91.2	94.9	78.1	135.9	70.55	20.65	8.62	28.5	2.21882e+07	2.36356e+07	7.01223e+07	3.04654e+07	2.01484e+07	2.45869e+07	2.02441e+07	2.30612e+07	1.96821e+07	3.52181e+07	3.72821e+07	2.09752e+07	High	High	High	High	High	High	High
FALSE	High	Master Protein	Glyma.06G131300.1.p	PTHR14136:SF11 - THYLAKOID LUMENAL 17.4 KDA PROTEIN, CHLOROPLASTIC (1 of 2)	0	123.555	51	11	280	1	4	239	25.6	7.53	854.19	11	1.568	1.36	2.614	1	1	0.839499	95.8	61.1	83.2	159.9	64.2	82.45	70.08	37.28	2.0605e+08	3.50354e+08	7.4359e+08	1.62153e+08	2.23509e+08	7.13206e+08	3.03991e+08	288167849	8.99468e+08	5.60081e+08	5.84349e+08	1.04239e+09	High	High	High	High	High	High	High
FALSE	High	Master Protein	Glyma.11G254300.1.p	K17285 - selenium-binding protein 1 (SELENBP1) (1 of 4)	0	123.524	45	17	65	3	3	480	53.1	6.18	172.53	17	2.108	2.834	0.431	0.0065442	0.00124904	0.00535928	132.3	62.8	177.9	27	12.12	13.56	13.47	2.9	7.09011e+06	8.43605e+06	6.72979e+06	3.36294e+06	2.66715e+06	3.44768e+06	9.53164e+06	8646782	1.12446e+07	1.43503e+06	1.44802e+06	1.51434e+06	High	High	Not Found	High	High	Not Found	High
FALSE	High	Master Protein	Glyma.19G126700.1.p	PTHR31407:SF14 - PSBP DOMAIN-CONTAINING PROTEIN 6, CHLOROPLASTIC (1 of 4)	0	123.281	59	11	142	0	2	260	28.4	5.97	441.69	11	0.867	0.916	1.26	1	1	1	85.8	98.9	90.6	124.7	44.67	62.69	80.49	30.31	3.49181e+07	3.43899e+07	1.33434e+07	3.70223e+07	3.96594e+07	1.03531e+08	6.45137e+07	3.63121e+07	6.77975e+06	7.88894e+07	4.66502e+07	4.99748e+07	High	High	High	High	High	High	High
FALSE	High	Master Protein	Glyma.18G158100.2.p	PTHR10516:SF279 - PEPTIDYL-PROLYL CIS-TRANS ISOMERASE FKBP65 (1 of 3)	0	123.222	34	15	94	3	11	544	60.9	5.24	237.41	15	0.882	0.877	0.469	1	1	1	109.3	123.9	108.7	58.1	43.62	50.89	33.07	5.37	1.99516e+08	1.62393e+08	7.55653e+07	1.84102e+08	2.10055e+08	6.42681e+07	1.64617e+08	1.61506e+08	8.46727e+07	9.31087e+07	8.40187e+07	8.63866e+07	High	High	High	High	High	High	High
FALSE	High	Master Protein	Glyma.09G206900.1.p	PF00076 - RNA recognition motif. (a.k.a. RRM, RBD, or RNP domain) (RRM_1) (1 of 477)	0	123.083	45	12	98	3	3	280	29.8	6.15	323.97	12	1.895	4.623	1.142	1	1	1	87.5	46.2	213.5	52.7	47.09	98.46	72.36	48.4	3.29054e+09	2.93456e+09	1.13516e+09	1.54877e+09	4.97152e+09	5.47851e+08	1.04689e+10	7.16017e+09	1.39923e+09	1.76872e+09	1.34604e+09	3.31722e+09	High	Peak Found	High	Peak Found	Peak Found	High	High
FALSE	High	Master Protein	Glyma.01G015500.1.p	PF00076 - RNA recognition motif. (a.k.a. RRM, RBD, or RNP domain) (RRM_1) (1 of 477)	0	122.959	46	12	103	3	3	279	29.8	6.4	358.96	12	1.697	0.838	1.745	0.415165	1	0.194338	128.6	75.8	63.5	132.2	16.03	11.72	32.62	1.98	1.24911e+08	9.03685e+07	1.07877e+08	6.35598e+07	5.71539e+07	7.2177e+07	5.32578e+07	36959287	7.22605e+07	1.07416e+08	1.11417e+08	1.10882e+08	High	High	High	High	High	High	Peak Found
FALSE	High	Master Protein	Glyma.03G123100.2.p	PTHR31407:SF14 - PSBP DOMAIN-CONTAINING PROTEIN 6, CHLOROPLASTIC (1 of 4)	0	122.791	58	11	145	2	2	265	29.1	7.43	470.16	11	0.75	0.945	1.699	1	1	1	68.3	91	86	154.7	63.4	46.5	65.83	41.15	5.85182e+07	7.15933e+07	1.36596e+07	7.27775e+07	7.79792e+07	1.58209e+08	7.36597e+07	7.89223e+07	1.33786e+07	1.40745e+08	5.82101e+07	1.32525e+08	High	High	High	High	High	High	High
FALSE	High	Master Protein	Glyma.15G148900.1.p	PTHR11991 - TRANSLATIONALLY CONTROLLED TUMOR PROTEIN-RELATED (1 of 4)	0	122.727	62	8	118	2	2	167	19	4.73	449.07	8	0.881	0.549	0.358	1	1	0.80106	126.3	143.5	78.8	51.4	29.77	19.92	51.91	72.44	2.17676e+07	2.14244e+07	3.50397e+07	2.47174e+07	2.79457e+07	1.86237e+07	7.84914e+06	1.35789e+07	2.31023e+07	7.65586e+06	2.60093e+07	8.85583e+06	High	High	High	High	High	High	High
FALSE	High	Master Protein	Glyma.18G021100.1.p	K18592 - gamma-glutamyltranspeptidase / glutathione hydrolase / leukotriene-C4 hydrolase (GGT1_5) (1 of 3)	0	122.723	24	11	74	9	11	624	67.2	9.41	177.9	11	1.423	1.202	0.899	0.763136	1	1	125.8	88.4	106.3	79.5	4.3	25.91	4.7	23.98	9.61158e+07	1.01054e+08	1.04745e+08	7.10066e+07	8.92782e+07	5.25182e+07	8.39024e+07	9.15854e+07	8.53175e+07	6.38133e+07	7.92645e+07	4.862e+07	High	High	High	High	High	High	High
FALSE	High	Master Protein	Glyma.08G074000.1.p	K08917 - light-harvesting complex II chlorophyll a/b binding protein 6 (LHCB6) (1 of 3)	0	122.68	47	10	133	7	9	258	27.4	7.49	384.87	10	0.55	0.641	0.144	1	1	1	94.2	171.4	109.8	24.7	65.79	76.02	55.59	86.96	6.23855e+08	4.24231e+08	1.16767e+08	7.71778e+08	8.72513e+08	7.33475e+07	5.00154e+08	4.94369e+08	1.34808e+08	1.11016e+08	3.27864e+08	5.64288e+07	High	High	High	High	High	High	High
FALSE	High	Master Protein	Glyma.11G199900.1.p	3.6.4.8 - Proteasome ATPase / RP triple-A protein (1 of 3)	0	122.64	43	15	85	1	1	423	47.4	5.6	219.5	15	100	100	100				173		111.3	115.7	12.08		23.11	62.03	3.10258e+07	2.44408e+07	2.69843e+07				1.73557e+07	1.34766e+07	2.15451e+07	2.27679e+07	1.80428e+07	4.64842e+06	High	Not Found	High	Not Found	Not Found	Not Found	Not Found
FALSE	High	Master Protein	Glyma.07G073700.1.p	PTHR16254:SF13 - K(+) EFFLUX ANTIPORTER 1, CHLOROPLASTIC-RELATED (1 of 4)	0	122.583	20	17	73	0	10	1206	129.7	5.03	204.44	17	3.244	2.044	1.428	0.0067601	0.0694521	0.473788	168.2	51.8	105.9	74	34.44	1.77	15.53	5.13	5.54668e+07	5.15081e+07	9.31233e+07	1.73891e+07	1.70962e+07	1.67855e+07	2.89083e+07	3.49387e+07	3.95898e+07	2.44051e+07	2.59248e+07	2.34197e+07	High	High	High	High	High	Peak Found	High
FALSE	High	Master Protein	Glyma.04G226900.1.p	K02940 - large subunit ribosomal protein L9e (RP-L9e, RPL9) (1 of 4)	0	122.472	63	11	94	5	5	192	21.7	9.5	275.54	11	1.046	0.43	0.06	1	1	0.280939	165	157.7	67.8	9.4	14.57	73.97	61.56	39.13	4.28477e+08	3.55382e+08	3.23568e+08	3.3961e+08	3.55015e+08	3.56887e+07	1.46092e+08	1.90908e+08	4.01816e+07	2.02449e+07	3.44536e+07	1.68654e+07	High	High	Peak Found	High	High	High	High
FALSE	High	Master Protein	Glyma.17G075900.1.p	K02864 - large subunit ribosomal protein L10 (RP-L10, MRPL10, rplJ) (1 of 1)	0	122.438	42	11	142	5	11	264	29.5	9.26	453.16	11	1.643	1.407	1.001	1	0.842138	1	130.2	79.2	111.4	79.3	49.47	52.28	49.73	68.81	3.86125e+08	5.11873e+08	9.7179e+08	3.11454e+08	3.50857e+08	1.02773e+08	3.95294e+08	4.381e+08	9.1824e+08	2.72125e+08	8.67373e+08	3.1167e+08	High	High	High	High	High	High	High
FALSE	High	Master Protein	Glyma.05G051600.2.p	K09560 - suppressor of tumorigenicity protein 13 (ST13) (1 of 3)	0	122.382	27	9	104	1	3	400	43.1	4.97	314.66	9	0.684	0.339	1.136	1	0.140821	1	86.6	126.6	42.9	143.8	26.85	40.1	44.71	34.54	2.60428e+07	1.96386e+07	3.38488e+07	3.80879e+07	3.462e+07	6.90362e+07	1.29079e+07	1.02833e+07	2.34072e+07	6.98456e+07	3.73244e+07	4.3263e+07	High	High	High	High	High	High	High
FALSE	High	Master Protein	Glyma.05G110200.1.p	PTHR11588:SF101 - TUBULIN ALPHA-2 CHAIN-RELATED (1 of 8)	0	122.335	34	13	83	0	4	450	49.6	5.1	248.83	13	1.046	0.759	0.845	1	1	1	114.6	109.6	83.2	92.6	21.29	20.8	38.39	27.63	4.50217e+07	3.0988e+07	3.25137e+07	3.53467e+07	3.10884e+07	2.31155e+07	1.3369e+07	2.361e+07	3.05467e+07	3.19748e+07	2.62822e+07	1.8008e+07	High	High	Peak Found	High	High	High	High
FALSE	High	Master Protein	Glyma.15G227500.1.p	PTHR11413:SF55 - CYSTEINE PROTEINASE INHIBITOR 6 (1 of 2)	0	122.248	61	11	64	5	5	245	27.6	7.8	206.62	11	19.755	0.361	1.7	1	1	1	346.3	17.5	6.3	29.8	83.02	50.88	14.74	2	4.53609e+08	4.72575e+08	1.31426e+07	1.63607e+07	2.29618e+07	4.32284e+07	8.28262e+06	6337003	8.28977e+06	3.92271e+07	3.77994e+07	3.90367e+07	High	High	High	High	High	High	High
FALSE	High	Master Protein	Glyma.07G062400.1.p	PTHR12735//PTHR12735:SF22 - BOLA-LIKE PROTEIN-RELATED // SUBFAMILY NOT NAMED (1 of 2)	0	122.148	46	12	74	5	5	391	42.7	5.78	233.19	12	0.63	1.092	1.48	1	1	0.573109	60	95.2	103.9	140.9	29.61	20.33	22.99	20.16	6.98547e+06	1.15018e+07	7.23335e+06	1.14764e+07	1.24525e+07	8.28013e+06	8.53405e+06	12528065	1.35551e+07	1.69853e+07	1.30509e+07	1.96962e+07	High	High	High	High	High	Peak Found	High
FALSE	High	Master Protein	Glyma.16G041700.1.p	PTHR11122:SF18 - NDH-DEPENDENT CYCLIC ELECTRON FLOW 1 (1 of 2)	0	122.142	30	10	81	1	1	359	39.3	8.54	279.1	10	1.075	0.611	0.225	1	0.5799	0.0139938	147.7	137.5	83.9	30.9	17.78	14.76	16.56	38.25	1.74907e+07	2.49985e+07	2.09206e+07	1.52942e+07	1.9465e+07	2.03848e+07	9.82018e+06	1.37313e+07	1.18866e+07	4.37306e+06	7.85668e+06	4.12825e+06	High	High	High	High	High	Not Found	High
FALSE	High	Master Protein	Glyma.11G078100.1.p	K03029 - 26S proteasome regulatory subunit N10 (PSMD4, RPN10) (1 of 4)	0	121.959	34	10	87	2	2	405	42.9	4.73	286.42	10	1.876	11.654	0.01	0.82367	0.0665088		51.6	27.5	320.8		107.47	11.46	55.74		3.086e+07	5.58574e+06	4.87433e+06	2.54945e+06	2.97817e+06	3.207e+06	2.84177e+07	76001720	3.47088e+07				Peak Found	Peak Found	High	Peak Found	High	Not Found	Peak Found
FALSE	High	Master Protein	Glyma.11G209200.1.p	K02943 - large subunit ribosomal protein LP2 (RP-LP2, RPLP2) (1 of 6)	0	121.904	96	10	121	8	8	114	11.4	4.41	490.53	10	1.088	2.029	1.425	1	0.757739	1	78.5	72.2	146.4	102.9	49.87	42.33	54.82	54.22	1.01867e+08	1.34006e+08	2.57111e+08	1.00698e+08	1.23139e+08	2.18196e+08	2.09399e+08	2.49836e+08	5.45755e+08	1.7549e+08	3.95184e+08	1.58947e+08	High	High	High	High	High	High	High
FALSE	High	Master Protein	Glyma.06G324000.1.p	K12837 - splicing factor U2AF 65 kDa subunit (U2AF2) (1 of 3)	0	121.825	35	13	71	0	1	605	68	7.52	211.38	13	0.01	0.01	1.419			1		165.4		234.6		24.91		58.8				4.44742e+06	3.06787e+06	5.12809e+06				6.30898e+06	6.90446e+06	1.60314e+06	Not Found	Not Found	Not Found	High	Not Found	High	Not Found
FALSE	High	Master Protein	Glyma.08G134300.1.p	PTHR18901//PTHR18901:SF30 - 2-DEOXYGLUCOSE-6-PHOSPHATE PHOSPHATASE 2 // SUBFAMILY NOT NAMED (1 of 2)	0	121.701	30	10	126	0	4	323	35.7	7.05	423.97	10	0.867	0.85	0.92	1	1	1	95.3	110	93.5	101.2	10.37	8.79	19.59	25.79	3.8728e+07	4.56278e+07	4.73156e+07	4.55488e+07	5.26447e+07	5.37486e+07	3.61448e+07	44762254	5.37285e+07	7.0768e+07	4.84291e+07	4.47148e+07	High	High	High	High	High	High	High
FALSE	High	Master Protein	Glyma.08G167600.1.p	K02726 - 20S proteasome subunit alpha 2 (PSMA2) (1 of 4)	0	121.687	57	12	98	0	3	235	25.6	5.68	266.83	12	2.816	2.421	3.285	0.678436	0.600505	0.16306	118.3	42	101.7	138	24.1	65.56	16.21	15.17	3.24064e+07	5.32373e+07	4.47712e+07	4.06218e+07	1.58962e+07	1.2978e+07	3.8489e+07	3.37608e+07	4.64519e+07	5.02347e+07	5.22246e+07	6.58697e+07	High	High	High	Peak Found	High	Peak Found	High
FALSE	High	Master Protein	Glyma.10G261400.1.p	1.1.1.95 - Phosphoglycerate dehydrogenase / Phosphoglyceric acid dehydrogenase (1 of 5)	0	121.67	36	13	67	5	5	594	62.6	6.76	194.18	13	0.998	0.617	0.716	1	0.686467	1	119.9	120.1	74.1	85.9	15.18	21.32	25.96	15.44	1.05941e+07	1.12196e+07	1.39973e+07	1.12381e+07	1.18731e+07	7.79146e+06	9.26842e+06	5544804	6.93312e+06	9.59558e+06	8.04127e+06	7.07504e+06	High	High	Not Found	High	High	Not Found	High
FALSE	High	Master Protein	Glyma.07G253700.1.p	2.7.9.1 - Pyruvate, phosphate dikinase / Pyruvate,phosphate dikinase (1 of 3)	0	121.548	20	16	110	1	1	927	101.7	5.85	275.58	16	2.43	2.114	5.633	1	0.686467	0.0913611	87	35.8	75.7	201.6	64.29	25.05	42.74	19.19	1.76213e+07	2.05894e+07	3.74555e+06	4.80193e+06	8.0051e+06	7.25167e+06	1.19088e+07	15330793	2.65598e+07	5.07351e+07	3.47206e+07	4.08473e+07	High	Peak Found	Peak Found	High	Peak Found	Not Found	High
FALSE	High	Master Protein	Glyma.19G110700.1.p	PTHR11122:SF18 - NDH-DEPENDENT CYCLIC ELECTRON FLOW 1 (1 of 2)	0	121.307	30	10	83	1	1	357	39.2	8.09	284.53	10	0.875	0.432	0.514	1	0.12764	0.271347	124.1	141.8	61.2	72.8	9.32	17.72	36.87	18.02	8.84104e+06	1.06622e+07	9.82899e+06	1.28606e+07	8.97106e+06	1.12269e+07	3.89482e+06	7.79277e+06	4.84752e+06	5.76762e+06	7.66441e+06	5.60893e+06	High	High	High	High	High	Not Found	High
FALSE	High	Master Protein	Glyma.02G296400.1.p	PTHR23344:SF8 - GLYCEROPHOSPHODIESTER PHOSPHODIESTERASE-LIKE PROTEIN-RELATED (1 of 8)	0	121.241	29	17	144	9	9	753	81.8	6.2	376.74	17	0.927	0.954	0.744	1	1	1	102.3	110.4	105.3	82.1	19.02	36.81	50.23	19	7.62123e+07	7.74902e+07	1.05268e+08	8.36355e+07	8.5314e+07	4.00765e+07	5.82644e+07	7.97877e+07	1.50657e+08	5.48158e+07	7.90433e+07	6.22051e+07	High	High	High	High	High	High	High
FALSE	High	Master Protein	Glyma.03G098900.1.p	1.1.1.54//1.3.1.102//1.3.1.74 - 2-alkenal reductase (NADP(+)) / NADPH-dependent alkenal/one oxidoreductase // 2-alkenal reductase (NAD(P)(+)) / NADPH:2-alkenal alpha,beta-hydrogenase (1 of 7)	0	121.172	50	14	85	9	10	342	37.8	7.47	223.64	14	1.17	1.022	0.638	1	1	1	122.2	104.4	106.7	66.7	0.94	30.18	15.69	38.97	7.62871e+07	7.48875e+07	7.58332e+07	7.89694e+07	6.48353e+07	4.19437e+07	5.0948e+07	6.62616e+07	6.90248e+07	3.39419e+07	6.96382e+07	4.13853e+07	High	High	High	High	High	Peak Found	High
FALSE	High	Master Protein	Glyma.18G028400.2.p	PTHR21649:SF32 - CHLOROPHYLL A-B BINDING PROTEIN CP29.3, CHLOROPLASTIC (1 of 2)	0	121.16	44	8	105	2	2	278	30.6	6.81	372.18	8	0.78	0.745	0.408	1	1	0.574551	106.4	136.4	101.6	55.7	50.93	29.09	47.75	36.08	2.31188e+08	1.4153e+08	7.87106e+07	2.39274e+08	1.81471e+08	1.32168e+08	1.47919e+08	135194640	5.02957e+07	1.11933e+08	7.40787e+07	5.49822e+07	High	High	High	High	High	High	High
FALSE	High	Master Protein	Glyma.08G006500.1.p	K08054 - calnexin (CANX) (1 of 3)	0	121.134	35	17	69	5	5	538	61.6	4.94	171.21	17	2.211	1.465	0.791	0.166407	0.721309	0.856409	161.8	73.2	107.2	57.9	26.89	10.59	15.46	19.11	6.38995e+06	4.1711e+06	7.27467e+06	2.89021e+06	3.31281e+06	2.69895e+06	4.23327e+06	3.51629e+06	4.8082e+06	1.85058e+06	2.28672e+06	2.72497e+06	High	High	High	High	High	Peak Found	Peak Found
FALSE	High	Master Protein	Glyma.11G006600.1.p	K02984 - small subunit ribosomal protein S3Ae (RP-S3Ae, RPS3A) (1 of 5)	0	121.044	48	13	107	2	5	261	29.7	9.8	303.06	13	1.213	0.661	0.757	1	1	1	133.6	110.2	72.8	83.4	28.09	28.61	42.64	11.2	8.02133e+07	5.94559e+07	4.57313e+07	4.90226e+07	5.75909e+07	3.16955e+07	3.24214e+07	6.03269e+07	2.87486e+07	4.174e+07	3.33767e+07	3.71194e+07	High	High	High	High	High	High	High
FALSE	High	Master Protein	Glyma.18G237400.1.p	K02931 - large subunit ribosomal protein L5 (RP-L5, MRPL5, rplE) (1 of 2)	0	120.969	49	11	205	3	3	267	29	10.07	615.47	11	0.807	0.999	1.02	1	1	1	84.4	104.5	104.5	106.6	21.69	3.79	19.49	28.79	5.98601e+07	8.74837e+07	6.27245e+07	7.47284e+07	8.06122e+07	7.77122e+07	5.50388e+07	80136985	7.76585e+07	7.92802e+07	1.11338e+08	6.34756e+07	High	High	High	High	High	High	High
FALSE	High	Master Protein	Glyma.14G061100.1.p	K02941 - large subunit ribosomal protein LP0 (RP-LP0, RPLP0) (1 of 5)	0	120.942	41	10	94	2	3	319	34.2	5.11	327.07	10	0.936	1.05	0.744	1	1	1	100.4	107.3	112.6	79.7	26.87	60.9	31.96	65.27	5.61291e+07	5.57428e+07	8.67458e+07	6.76269e+07	5.99795e+07	1.4336e+07	3.97632e+07	6.29877e+07	7.79739e+07	3.59067e+07	1.12656e+08	4.4599e+07	High	High	High	High	High	High	High
FALSE	High	Master Protein	Glyma.02G014000.3.p	K09584 - protein disulfide-isomerase A6 (PDIA6, TXNDC7) (1 of 6)	0	120.807	43	15	127	0	4	364	40.4	5.59	435.76	15	0.308	0.394	1.304	0.829643	0.783819	1	41	133.1	52.4	173.5	46.68	72.59	68.81	49.51	8.51675e+06	1.36895e+07	2.22008e+07	2.3584e+07	4.44879e+07	1.03715e+08	7.62865e+06	1.75179e+07	3.47924e+07	5.79966e+07	2.88242e+07	8.57899e+07	High	High	High	High	High	High	High
FALSE	High	Master Protein	Glyma.18G050900.1.p	3.6.4.8 - Proteasome ATPase / RP triple-A protein (1 of 3)	0	120.801	43	15	84	1	1	422	47.3	5.6	216.3	15																											Not Found	Not Found	High	Not Found	Not Found	Not Found	Not Found
FALSE	High	Master Protein	Glyma.05G200500.3.p	K03428 - magnesium-protoporphyrin O-methyltransferase (E2.1.1.11, chlM, bchM) (1 of 2)	0	120.519	48	14	111	3	3	324	35.1	7.49	288.26	14	0.763	0.717	0.237	1	1	0.0233723	112.3	147.2	105.5	34.9	17.83	29.04	12.51	32.65	4.72719e+07	3.4633e+07	3.57585e+07	4.6895e+07	5.21984e+07	2.86309e+07	3.45275e+07	3.36058e+07	2.72243e+07	9.72903e+06	1.75711e+07	1.11299e+07	High	High	High	High	High	Peak Found	High
FALSE	High	Master Protein	Glyma.02G277300.1.p	PF03168 - Late embryogenesis abundant protein (LEA_2) (1 of 105)	0	120.391	45	11	111	0	1	321	35.8	5.02	321.7	11	0.859	2.217	1.345	1	0.245521	1	63.4	73.8	163.6	99.2	27.2	32.52	20.85	32.26	2.59568e+06	2.07206e+06	3.5406e+06	4.82209e+06	2.70198e+06	3.02165e+06	8.97525e+06	6.69837e+06	6.10868e+06	4.06326e+06	3.52728e+06	6.35034e+06	Peak Found	Peak Found	Not Found	Peak Found	Peak Found	Not Found	Not Found
FALSE	High	Master Protein	Glyma.11G084700.2.p	K04523 - ubiquilin (UBQLN, DSK2) (1 of 4)	0	120.365	31	10	60	0	1	541	57.3	4.84	139.52	10	1.067	1.592	0.847	1	1	1	94.7	88.8	141.3	75.2	107.19	105.84	113.65	117.09	1.57925e+07	1.65997e+07	9.50903e+07	1.55629e+07	1.47023e+07	8.64422e+07	2.47786e+07	2.09068e+07	1.53478e+08	9.58238e+06	8.24162e+07	1.31823e+07	Peak Found	Peak Found	High	Peak Found	Peak Found	High	Peak Found
FALSE	High	Master Protein	Glyma.02G094300.1.p	K00164 - 2-oxoglutarate dehydrogenase E1 component (OGDH, sucA) (1 of 3)	0	120.364	24	19	76	1	19	1029	116.4	6.81	182.67	19	0.953	0.64	0.708	1	0.658856	1	115.5	121.2	77.6	85.8	19.08	20.71	35.43	26.94	1.0048e+08	1.03647e+08	7.17959e+07	1.19845e+08	1.05404e+08	7.85196e+07	3.8628e+07	6.74723e+07	8.24314e+07	9.51333e+07	5.48043e+07	7.46313e+07	High	High	High	High	High	Peak Found	High
FALSE	High	Master Protein	Glyma.03G120800.1.p	K03626 - nascent polypeptide-associated complex subunit alpha (EGD2, NACA) (1 of 8)	0	120.336	57	7	112	1	1	203	22.1	4.54	396.3	7	0.01	0.276	0.887		0.052979	1		184.9	51.1	164		44.2	36.26	16.58				2.16574e+07	4.93278e+07	2.77253e+07	9.8369e+06	7663379	4.53852e+06	2.85767e+07	2.45819e+07	2.04425e+07	Not Found	Not Found	High	Not Found	High	High	Not Found
FALSE	High	Master Protein	Glyma.10G197700.1.p	1.1.1.82 - Malate dehydrogenase (NADP(+)) / NADP-linked malate dehydrogenase (1 of 2)	0	120.216	38	14	80	0	4	436	47.7	6.61	267.45	14	0.774	0.711	1.278	1	0.858122	1	82.3	106.3	75.6	135.8	30.04	7.19	24.55	36.9	1.35017e+07	1.24244e+07	2.10583e+07	1.94317e+07	1.74361e+07	1.70152e+07	8.56418e+06	1.41959e+07	1.23993e+07	2.31432e+07	2.22836e+07	1.0766e+07	High	High	High	High	High	High	High
FALSE	High	Master Protein	Glyma.03G120000.3.p	K01209 - alpha-N-arabinofuranosidase (E3.2.1.55, abfA) (1 of 6)	0	120.179	23	12	92	4	4	676	73.8	6.24	272.13	12	0.948	0.754	1.162	1	0.944225	1	98.1	103.5	78	120.3	31.2	16.44	25.74	15.8	1.05375e+07	1.41033e+07	1.96823e+07	1.45341e+07	1.48747e+07	1.93196e+07	1.12151e+07	9.16183e+06	1.51619e+07	1.72882e+07	1.32218e+07	1.79207e+07	High	High	High	High	High	High	High
FALSE	High	Master Protein	Glyma.02G000900.1.p	PTHR12735//PTHR12735:SF6 - BOLA-LIKE PROTEIN-RELATED // SUBFAMILY NOT NAMED (1 of 1)	0	120.166	51	5	82	2	5	157	17.2	9.63	375.08	5	1.272	1.305	1.806	1	1	0.626273	94.5	74.3	97	134.2	20.73	41.09	23.23	14.43	1.62831e+08	2.2575e+08	2.47456e+08	1.77482e+08	1.52725e+08	3.17161e+08	2.31649e+08	2.0707e+08	3.18672e+08	3.69531e+08	2.7657e+08	3.20486e+08	High	High	High	High	High	High	High
FALSE	High	Master Protein	Glyma.17G072400.1.p	PTHR19375:SF229 - HEAT SHOCK 70 KDA PROTEIN 5 (1 of 6)	0	119.984	21	12	120	1	2	645	70.8	5.39	386.57	12	100						400				6.6				1.4483e+07	1.60239e+07	1.41961e+07										Not Found	Not Found	High	Not Found	Not Found	High	Not Found
FALSE	High	Master Protein	Glyma.12G013100.2.p	PTHR11527:SF95 - 23.5 KDA HEAT SHOCK PROTEIN, MITOCHONDRIAL-RELATED (1 of 2)	0	119.934	46	10	63	1	1	211	23.7	6.98	195.49	10	0.01	0.668	0.195		1	0.302705		214.7	143.5	41.8		26.85	94.99	16.85				1.36059e+07	7.84121e+06	1.07572e+07	7.18749e+06	1.75293e+06	1.91231e+07	1.74275e+06	2.09672e+06	2.4493e+06	Not Found	Not Found	Not Found	Not Found	Peak Found	High	Not Found
FALSE	High	Master Protein	Glyma.13G144800.1.p	K00856 - adenosine kinase (E2.7.1.20, ADK) (1 of 3)	0	119.888	40	8	77	2	2	341	37.5	5.44	249.61	8	1.211	1.548	0.081	1	1	0.524278	126.1	104.2	161.2	8.5	90.43	37.16	79.11	105.43	2.20232e+08	4.16756e+08	2.04149e+07	1.81922e+08	2.51647e+08	1.15611e+08	2.8158e+08	3.03716e+08	1.78439e+07	5.0066e+07	1.48208e+07	3.83879e+06	High	High	High	High	High	High	High
FALSE	High	Master Protein	Glyma.12G021100.1.p	2.5.1.61 - Hydroxymethylbilane synthase / Uroporphyrinogen synthetase (1 of 4)	0	119.731	46	13	119	3	3	350	37.9	6.57	264.62	13	0.988	0.803	0.556	1	1	1	118.1	119.5	96	66.5	16.06	59.53	15.25	28.81	4.46244e+07	4.54054e+07	3.35765e+07	4.51786e+07	4.6945e+07	1.07409e+07	3.62695e+07	46330347	3.56065e+07	1.97656e+07	3.48723e+07	2.51235e+07	High	High	High	High	High	High	High
FALSE	High	Master Protein	Glyma.01G193700.1.p	PTHR11743:SF29 - MITOCHONDRIAL OUTER MEMBRANE PROTEIN PORIN 2-RELATED (1 of 2)	0	119.678	58	13	91	2	2	276	29.1	9.11	261.19	13	1.029	0.368	0.497	1	0.559034	0.505288	142.2	138.2	50.9	68.7	4.97	21.88	57.1	51	5.20771e+06	4.79492e+06	4.7729e+06	4.84624e+06	3.16079e+06	4.6599e+06	903558	1.71445e+06	3.0352e+06	2.62682e+06	801588	2.31573e+06	High	High	Not Found	High	High	Not Found	Not Found
FALSE	High	Master Protein	Glyma.11G201500.1.p	PF10674 - Protein of unknown function (DUF2488) (Ycf54) (1 of 2)	0	119.664	36	7	112	1	1	234	26.7	6.8	356.71	7	0.67	0.317	1.482	1	0.616972	1	77.3	115.3	36.5	170.9	51.91	38.25	81.52	49.61	9.57917e+06	1.0768e+07	2.31762e+07	1.60608e+07	7.79344e+06	1.76514e+07	373117	6.82232e+06	5.0855e+06	2.8313e+07	2.38026e+07	8.99576e+06	High	High	Peak Found	High	High	High	Peak Found
FALSE	High	Master Protein	Glyma.15G271300.1.p	K02934 - large subunit ribosomal protein L6e (RP-L6e, RPL6) (1 of 6)	0	119.641	50	13	107	5	5	232	25.9	10.15	267.85	13	1.304	1.349	0.533	1	1	0.677815	124.6	95.6	128.9	51	39.77	18.94	32.46	27.17	4.60996e+07	5.11726e+07	2.16813e+07	3.53557e+07	4.12103e+07	2.80319e+07	4.86544e+07	4.76956e+07	2.53786e+07	1.88542e+07	1.54349e+07	2.61497e+07	High	High	High	High	High	High	High
FALSE	High	Master Protein	Glyma.05G221600.3.p	K09013 - Fe-S cluster assembly ATP-binding protein (sufC) (1 of 2)	0	119.417	36	9	75	3	3	289	31.6	6.54	228.36	9	3.368	2.367	4.528	0.503438	0.581797	0.117742	119.6	35.5	84	160.8	22.14	19.94	83.04	10.45	1.92418e+07	2.52105e+07	3.02586e+07	1.0153e+07	7.14489e+06	7.48601e+06	8.8479e+06	1.77156e+07	4.8382e+07	3.39002e+07	3.21112e+07	3.9156e+07	High	High	High	High	High	Not Found	High
FALSE	High	Master Protein	Glyma.02G228100.1.p	K01953 - asparagine synthase (glutamine-hydrolysing) (asnB, ASNS) (1 of 7)	0	119.237	32	17	119	0	5	582	65.6	6.47	284.54	17	0.999	0.794	0.5	1	1	1	121.4	121.4	96.5	60.7	43.47	51.07	29.87	80.78	4.83106e+07	4.6726e+07	1.89431e+07	4.67569e+07	4.70831e+07	1.48683e+07	2.48691e+07	3.71389e+07	4.6381e+07	4.92105e+06	4.36675e+07	2.33844e+07	High	High	High	High	High	Peak Found	High
FALSE	High	Master Protein	Glyma.20G082800.1.p	KOG0131 - Splicing factor 3b, subunit 4 (1 of 43)	0	119.23	43	9	89	1	4	289	31.1	4.79	316.08	9	0.916	0.963	2.463	1	1	1	68.6	74.9	72.1	184.4	93.11	29.66	115.7	53.25	1.80296e+07	2.51826e+07	9.63976e+07	2.75035e+07	2.35151e+07	4.08572e+07	1.59651e+07	2.64927e+07	1.484e+08	6.7747e+07	1.19839e+08	4.02236e+07	High	High	High	High	High	High	High
FALSE	High	Master Protein	Glyma.15G045100.1.p	K01955 - carbamoyl-phosphate synthase large subunit (carB, CPA2) (1 of 2)	0	118.779	21	21	131	3	4	1161	126.7	5.43	333.42	21	1.25	1.195	0.409	1	1	0.112842	129.7	103.8	124.1	42.4	12.2	9.27	4.43	53.41	1.20599e+07	1.32969e+07	1.03997e+07	8.80251e+06	1.05974e+07	9.64686e+06	1.15328e+07	1.07519e+07	1.16882e+07	1.77651e+06	5.92002e+06	3.9435e+06	High	High	High	High	High	Peak Found	High
FALSE	High	Master Protein	Glyma.03G137000.1.p	K03403 - magnesium chelatase subunit H (chlH, bchH) (1 of 3)	0	118.759	17	20	69	4	4	1384	153.6	6.14	156.08	20	0.969	2.568	1.668	1	0.0134486	0.117742	62.5	64.5	165.5	107.5	16.65	5.11	29.9	10.28	3.41372e+06	2.84808e+06	3.98522e+06	3.35762e+06	3.52389e+06	3.71803e+06	9.04903e+06	7.41553e+06	1.31437e+07	6.9772e+06	5.87868e+06	5.85459e+06	High	Peak Found	High	High	High	Not Found	Peak Found
FALSE	High	Master Protein	Glyma.10G137800.1.p	K03070 - preprotein translocase subunit SecA (secA) (1 of 3)	0	118.333	23	19	70	1	1	1012	114.4	6.49	167.89	19																											Not Found	High	Not Found	High	High	Not Found	Not Found
FALSE	High	Master Protein	Glyma.03G086400.1.p	PTHR10394:SF6 - 40S RIBOSOMAL PROTEIN S8-1 (1 of 1)	0	118.177	47	12	84	0	5	220	24.8	10.36	256.85	12	1.166	1.544	0.433	1	0.145587	0.0277046	112.6	96.5	149.1	41.8	28	9.33	17.37	8.96	2.52576e+07	3.39167e+07	1.93441e+07	2.18601e+07	2.16607e+07	1.84292e+07	4.34402e+07	31810894	3.34483e+07	9.38967e+06	9.56798e+06	8.0886e+06	High	High	High	High	High	High	High
FALSE	High	Master Protein	Glyma.11G150400.1.p	PTHR21495:SF59 - DIRIGENT PROTEIN 20-RELATED (1 of 6)	0	118.152	56	7	91	7	7	191	21.2	6.37	306.21	7	2.063	1.351	1.601	0.444885	0.953584	0.451423	137.2	66.5	89.9	106.4	21.51	25.61	26.86	62.73	3.40578e+08	3.74758e+08	5.06466e+08	1.87222e+08	1.81616e+08	1.13286e+08	2.45406e+08	2.13995e+08	3.52669e+08	2.9069e+08	6.50894e+08	1.99625e+08	High	High	High	High	High	High	High
FALSE	High	Master Protein	Glyma.01G165100.1.p	K03029 - 26S proteasome regulatory subunit N10 (PSMD4, RPN10) (1 of 4)	0	117.933	32	9	87	0	1	405	42.8	4.73	286.89	9	100	100	100				272.6		13.4	114	9.15		2.41	76.91	1.71283e+06	2.04938e+06	1.83155e+06				87038.3	91144.6	90247.4	765692	1.71393e+06	311581	Not Found	Not Found	Peak Found	Not Found	Not Found	Not Found	Not Found
FALSE	High	Master Protein	Glyma.19G142400.1.p	K01939 - adenylosuccinate synthase (purA, ADSS) (1 of 2)	0	117.743	35	14	71	0	3	485	52.6	7.62	202.36	14	0.826	0.585	0.429	1	0.16935	0.0361802	116.4	140.8	82.4	60.4	13.89	9.65	7.06	31.7	9.38137e+06	1.19705e+07	9.6103e+06	1.1629e+07	1.23539e+07	1.01936e+07	6.86685e+06	6.03447e+06	6.80596e+06	3.77739e+06	7.08938e+06	4.99136e+06	High	High	Peak Found	High	High	Peak Found	High
FALSE	High	Master Protein	Glyma.18G057700.1.p	K00645 - fabD (1 of 2)	0	117.674	43	12	91	8	8	358	37.9	8.37	281.57	12	1.082	0.914	0.339	1	1	0.142531	129.8	119.9	109.7	40.6	6.86	26.19	10.82	49.24	5.92499e+07	6.08602e+07	5.33252e+07	5.47659e+07	6.02995e+07	3.53024e+07	5.00758e+07	4.82563e+07	5.8855e+07	1.37534e+07	1.85496e+07	3.47554e+07	High	High	High	High	High	Peak Found	High
FALSE	High	Master Protein	Glyma.11G120900.1.p	1.17.1.2 - 4-hydroxy-3-methylbut-2-enyl diphosphate reductase / HMBPP reductase (1 of 2)	0	117.665	31	15	92	0	3	462	52	5.36	238.6	15	1.453	1.123	1.148	1	1	1	123	84.7	95.1	97.2	40.63	33.56	55.9	37.62	2.73513e+07	1.44671e+07	3.50832e+07	1.98883e+07	1.88255e+07	9.96843e+06	9.72891e+06	2.11501e+07	3.38361e+07	1.10742e+07	2.48957e+07	2.16136e+07	High	High	Peak Found	High	High	Peak Found	High
FALSE	High	Master Protein	Glyma.11G228800.1.p	PTHR21649:SF32 - CHLOROPHYLL A-B BINDING PROTEIN CP29.3, CHLOROPLASTIC (1 of 2)	0	117.418	43	8	93	2	2	282	31.1	6.81	318.95	8	0.647	0.672	0.344	1	1	1	97.2	150.2	100.9	51.6	70.71	68.44	65.76	33.35	1.21805e+09	6.93483e+08	2.15704e+08	1.0716e+09	1.09587e+09	1.63083e+08	1.15583e+09	720009238	2.32133e+08	3.68332e+08	4.69144e+08	2.32185e+08	High	High	High	High	High	High	High
FALSE	High	Master Protein	Glyma.18G292600.1.p	PTHR10516:SF179 - PEPTIDYL-PROLYL CIS-TRANS ISOMERASE FKBP19, CHLOROPLASTIC (1 of 2)	0	117.152	48	10	113	0	10	242	26.3	8.59	292.94	10	1.634	1.387	2.16	0.725412	0.694706	0.217722	105.7	64.7	89.7	139.8	31.85	24.51	51.6	8.5	7.55202e+07	8.53905e+07	1.34009e+08	3.73085e+07	5.22556e+07	6.1862e+07	7.24631e+07	5.8753e+07	1.47921e+08	1.2556e+08	1.06345e+08	1.12893e+08	High	High	High	High	High	High	High
FALSE	High	Master Protein	Glyma.04G245200.1.p	PF10664 - Cyanobacterial and plastid NDH-1 subunit M (NdhM) (1 of 2)	0	117.135	41	9	109	5	5	217	25.1	5.71	361.86	9	1.832	3.021	1.635	0.841777	0.211861	0.562164	97.9	53.4	161.4	87.3	14.62	15.68	38.17	41.56	1.4487e+08	1.17333e+08	1.10573e+08	6.40454e+07	8.07697e+07	6.07223e+07	2.28425e+08	1.9349e+08	1.00002e+08	1.04683e+08	1.8712e+08	8.88978e+07	High	High	High	High	High	High	High
FALSE	High	Master Protein	Glyma.05G103600.1.p	PTHR31517:SF3 - PEROXIDASE 35-RELATED (1 of 4)	0	117.028	40	10	131	2	10	325	35.5	8.76	437.24	10	1.163	0.964	0.934	1	1	1	114.6	98.5	94.9	92	17.4	17.28	24.6	67.11	3.66113e+08	3.40188e+08	2.58807e+08	3.25962e+08	2.92553e+08	2.29754e+08	3.97093e+08	2.52577e+08	2.81905e+08	6.83549e+08	2.73109e+08	2.03323e+08	High	High	High	High	High	High	High
FALSE	High	Master Protein	Glyma.05G243800.1.p	K14753 - guanine nucleotide-binding protein subunit beta-2-like 1 protein (RACK1) (1 of 3)	0	117.006	33	11	72	0	11	325	35.6	7.72	239.05	11	0.916	0.743	0.823	1	0.634232	0.96798	105.2	114.9	85.4	94.6	3.18	29.57	2.92	22.35	2.1554e+08	2.16518e+08	2.04386e+08	2.35358e+08	1.91577e+08	3.38528e+08	1.74877e+08	1.73874e+08	1.83289e+08	1.93754e+08	2.53029e+08	1.63638e+08	High	High	Peak Found	High	High	Peak Found	High
FALSE	High	Master Protein	Glyma.01G211700.1.p	PTHR23050:SF214 - CALCIUM-BINDING PROTEIN CML14-RELATED (1 of 3)	0	116.883	84	13	203	4	4	147	16.5	4.88	563.33	13	0.6	2.124	2.652	1	1	0.856678	37.7	62.7	133.2	166.4	88.08	45.11	53.19	38.11	1.62773e+07	2.0163e+07	7.45673e+07	3.35959e+07	2.12039e+07	5.34812e+07	7.13466e+07	3.61966e+07	1.14934e+08	4.59138e+07	1.04707e+08	8.9108e+07	High	High	High	High	High	High	High
FALSE	High	Master Protein	Glyma.11G124900.1.p	PTHR10516:SF264 - FK506-BINDING PROTEIN 1 (1 of 2)	0	116.618	45	8	133	0	8	232	24.6	6.7	442.76	8	1.329	1.003	4.289	1	1	0.672842	69.8	52.5	52.6	225.1	88.02	84.41	91.43	32.72	9.96058e+07	1.45574e+08	4.98335e+08	8.77702e+07	1.09509e+08	3.78712e+08	8.57994e+07	1.09851e+08	4.24582e+08	4.69707e+08	4.03212e+08	7.34659e+08	High	High	High	High	High	High	High
FALSE	High	Master Protein	Glyma.16G129700.1.p	K02938 - large subunit ribosomal protein L8e (RP-L8e, RPL8) (1 of 4)	0	116.455	34	7	111	1	1	260	28.1	10.71	392.84	7	1.041	1.52	1.102	1	1	1	89.3	85.8	130.4	94.5	33.11	39.59	26.37	6.86	6.26398e+07	6.2527e+07	3.24505e+07	5.24189e+07	6.00926e+07	1.05683e+08	6.41197e+07	110696608	9.13171e+07	6.86613e+07	6.00197e+07	6.62171e+07	High	High	Peak Found	High	High	High	High
FALSE	High	Master Protein	Glyma.19G084900.2.p	K00413 - ubiquinol-cytochrome c reductase cytochrome c1 subunit (CYC1, CYT1, petC) (1 of 4)	0	116.447	40	8	49	1	1	307	33.6	6.95	170.15	8	0.01	0.01	0.01					400				6.03						1.11619e+06	1.20951e+06	1.07631e+06							Not Found	High	Not Found	Not Found	High	Not Found	Not Found
FALSE	High	Master Protein	Glyma.09G031800.1.p	K02945 - small subunit ribosomal protein S1 (RP-S1, rpsA) (1 of 6)	0	116.44	44	16	200	6	6	404	44.6	5.8	461.1	16	0.603	0.789	1.352	1	1	1	64.4	106.8	84.3	144.5	25.65	41.15	4.99	15.76	2.19922e+07	2.33955e+07	3.44558e+07	3.87959e+07	2.71363e+07	6.15103e+07	3.05256e+07	3.06053e+07	3.32863e+07	5.24596e+07	5.71204e+07	4.16363e+07	High	High	High	High	High	High	High
FALSE	High	Master Protein	Glyma.12G147200.1.p	K02730 - 20S proteasome subunit alpha 1 (PSMA6) (1 of 2)	0	116.289	53	12	90	1	12	246	27.4	5.86	248.98	12	1.396	1.11	0.693	1	1	1	133	95.3	105.8	66	29.71	15.05	39.26	58.97	1.27535e+08	1.53691e+08	2.24332e+08	1.38709e+08	1.06023e+08	1.10122e+08	7.59885e+07	1.22246e+08	1.73151e+08	7.6262e+07	1.80685e+08	6.59535e+07	High	High	High	High	High	Peak Found	High
FALSE	High	Master Protein	Glyma.19G020100.1.p	PTHR11743//PTHR11743:SF31 - VOLTAGE-DEPENDENT ANION-SELECTIVE CHANNEL // SUBFAMILY NOT NAMED (1 of 6)	0	116.284	64	14	147	5	5	276	29.7	9.07	454.09	14	0.763	0.608	0.939	1	0.790619	1	92.2	120.9	73.4	113.5	27.94	14.84	29.02	49.18	3.31614e+07	3.9791e+07	2.22331e+07	4.05057e+07	4.34614e+07	5.34771e+07	2.64065e+07	3.66866e+07	2.06925e+07	8.02178e+07	4.08165e+07	3.31104e+07	High	High	Peak Found	High	High	High	High
FALSE	High	Master Protein	Glyma.18G250100.1.p	PTHR10795//PTHR10795:SF365 - PROPROTEIN CONVERTASE SUBTILISIN/KEXIN // SUBFAMILY NOT NAMED (1 of 8)	0	116.28	31	16	90	0	14	802	86	9.14	217.33	16	0.84	1.09	0.848	1	1	1	89	105.9	115.4	89.8	13.28	15.16	11.25	38.82	7.76778e+07	9.74868e+07	7.84293e+07	9.33652e+07	8.33822e+07	1.1213e+08	1.22548e+08	1.01722e+08	1.01118e+08	1.42815e+08	7.40773e+07	7.91488e+07	High	High	Peak Found	High	High	High	High
FALSE	High	Master Protein	Glyma.04G020300.1.p	K02638 - plastocyanin (petE) (1 of 2)	0	116.069	42	4	561	2	2	165	16.6	5.2	2365.52	4	0.888	0.411	6.491	1	0.799187	0.885838	40.4	45.5	18.7	295.4	80.89	116.62	108.49	11.46	5.29978e+08	6.72242e+08	2.17222e+09	7.56639e+08	5.98348e+08	4.85931e+09	5.2425e+07	3.10704e+08	1.01575e+09	4.91142e+09	4.33597e+09	5.45906e+09	High	High	High	High	High	High	High
FALSE	High	Master Protein	Glyma.13G051000.1.p	K13811 - 3'-phosphoadenosine 5'-phosphosulfate synthase (PAPSS) (1 of 3)	0	115.945	38	17	98	9	15	488	54.2	7.42	226.13	17	1.001	0.881	0.6	1	1	0.412009	115	114.9	101.2	68.9	12.61	5.66	15.52	29.68	6.20289e+07	6.36406e+07	7.75624e+07	6.41852e+07	6.35962e+07	5.78455e+07	5.60302e+07	6.04212e+07	4.43317e+07	3.8153e+07	5.8427e+07	3.43317e+07	High	High	High	High	High	Peak Found	High
FALSE	High	Master Protein	Glyma.01G105500.1.p	K02726 - 20S proteasome subunit alpha 2 (PSMA2) (1 of 4)	0	115.879	57	12	98	1	1	235	25.6	5.68	253.71	12	1.067	0.196	1.798	1	0.0046844	0.376991	105.1	98.5	19.3	177.1	6.96	18.15	36.06	15.65	5.35607e+06	4.88027e+06	4.68258e+06	5.68106e+06	4.57246e+06	3.98481e+06	1.43916e+06	898463	733467	8.36602e+06	8.2224e+06	6.23628e+06	High	High	Not Found	High	Peak Found	Not Found	Not Found
FALSE	High	Master Protein	Glyma.09G250800.1.p	K02699 - photosystem I subunit XI (psaL) (1 of 2)	0	115.78	21	7	86	0	7	214	22.8	9.47	331.03	7	0.987	0.628	0.216	1	1	0.308311	139.5	141.3	88.7	30.6	76.16	46.48	41.08	18.58	6.65428e+08	4.05391e+08	1.7594e+09	7.112e+08	6.74021e+08	2.53937e+08	6.37284e+08	4.22998e+08	2.73858e+08	1.68902e+08	1.45817e+08	1.15726e+08	High	High	High	High	High	High	High
FALSE	High	Master Protein	Glyma.15G072100.1.p	PTHR10639:SF7 - CLATHRIN LIGHT CHAIN (1 of 4)	0	115.767	42	13	111	3	3	322	35.3	5.19	256.89	13	3.258	2.809	6.714	1	1	0.734075	94.6	29	81.5	194.9	106.86	122.82	122.33	44.15	1.13715e+07	1.33202e+07	7.19316e+07	2.74585e+06	4.08905e+06	2.83187e+07	6.3847e+06	11487123	7.2868e+07	2.7455e+07	5.5545e+07	2.73725e+07	High	High	High	Peak Found	Peak Found	High	High
FALSE	High	Master Protein	Glyma.17G138500.1.p	PTHR31953:SF17 - ACID BETA-FRUCTOFURANOSIDASE 3, VACUOLAR-RELATED (1 of 4)	0	115.523	26	16	102	1	7	645	71.9	5.38	290.21	16	0.509	0.427	1.255	1	0.617062	1	63.8	125.4	53.5	157.3	21.64	17.97	75.18	35.67	2.00498e+07	2.17274e+07	2.9701e+07	3.65514e+07	4.27273e+07	5.21839e+07	7.44627e+06	1.82453e+07	3.95987e+07	5.76327e+07	5.36271e+07	2.7302e+07	High	High	High	High	High	High	High
FALSE	High	Master Protein	Glyma.03G132700.1.p	PTHR32227:SF49 - BETA-1,3-GLUCANASE 1-RELATED (1 of 5)	0	115.519	55	13	76	11	13	347	38.1	8.69	207.58	13	1.86	1.58	0.497	0.750393	1	0.12854	150.7	81	128	40.3	38.31	32.3	20.8	6.56	9.45704e+07	1.26864e+08	1.99523e+08	1.09351e+08	6.82098e+07	6.18659e+07	1.13686e+08	7.54531e+07	1.0778e+08	3.10526e+07	3.53653e+07	3.39148e+07	High	High	High	High	High	Peak Found	High
FALSE	High	Master Protein	Glyma.08G020300.1.p	K02150 - V-type H+-transporting ATPase subunit E (ATPeV1E, ATP6E) (1 of 7)	0	115.398	44	11	105	0	2	232	26.8	6.25	308.45	11	1.597	0.861	1.836	1	1	0.952233	120.7	75.6	65	138.7	60.87	23.41	74.87	18.99	1.09192e+07	2.20906e+07	4.043e+07	1.27089e+07	1.3836e+07	1.9407e+07	1.05142e+07	11908132	3.67706e+07	2.53991e+07	3.36345e+07	2.38815e+07	Peak Found	High	Peak Found	High	High	High	Peak Found
FALSE	High	Master Protein	Glyma.19G139300.1.p	K03403 - magnesium chelatase subunit H (chlH, bchH) (1 of 3)	0	115.345	17	19	66	1	3	1383	153.4	6.32	151.24	19	1.652	3.618	2.856	0.694789	0.0247994	0.034596	72.4	43.8	158.6	125.2	13.52	15.82	38.69	10.22	7.54896e+06	5.80103e+06	6.39014e+06	3.39763e+06	3.86899e+06	4.64182e+06	8.05734e+06	1.84768e+07	1.39963e+07	1.1049e+07	1.27717e+07	1.05389e+07	Not Found	Not Found	High	High	Not Found	Not Found	Not Found
FALSE	High	Master Protein	Glyma.10G138600.1.p	K00231 - oxygen-dependent protoporphyrinogen oxidase (PPOX, hemY) (1 of 2)	0	115.229	34	12	59	11	12	543	58.7	8.69	165.46	12	0.956	0.672	0.626	1	1	0.905479	117.5	122.9	82.6	76.9	8.8	20.33	66.16	31.19	5.71215e+07	6.44913e+07	5.45352e+07	6.84971e+07	5.9742e+07	4.52216e+07	3.122e+07	4.01334e+07	1.01093e+08	3.73897e+07	4.82213e+07	2.51927e+07	High	High	High	High	High	Peak Found	High
FALSE	High	Master Protein	Glyma.16G028800.1.p	K02932 - large subunit ribosomal protein L5e (RP-L5e, RPL5) (1 of 5)	0	115.217	37	11	76	0	1	298	34	9.33	241.61	11	0.771	0.341	0.01	1	0.0352288		146	189.4	64.6		12.21	18.88	21.16		1.48108e+07	1.68164e+07	1.89258e+07	2.18187e+07	1.56197e+07	2.24303e+07	7.44354e+06	10467382	7.32676e+06				High	High	Not Found	High	Peak Found	Not Found	High
FALSE	High	Master Protein	Glyma.13G319300.1.p	PTHR23084//PTHR23084:SF155 - PHOSPHATIDYLINOSITOL-4-PHOSPHATE 5-KINASE RELATED // SUBFAMILY NOT NAMED (1 of 2)	0	115.196	24	17	86	1	1	860	99.3	4.58	198.03	17	100	100	100				58.4		275.6	66	121.49		56.96	24.72	4.3502e+06	2.3681e+06	2.68247e+07				2.05466e+07	5.48871e+06	2.18427e+07	6.74584e+06	4.92316e+06	4.20848e+06	Peak Found	Peak Found	Peak Found	Not Found	Not Found	Not Found	High
FALSE	High	Master Protein	Glyma.13G144900.1.p	1.1.1.41 - Isocitrate dehydrogenase (NAD(+)) / Nicotinamide adenine dinucleotide isocitrate dehydrogenase (1 of 6)	0	114.961	38	11	82	1	1	361	39.5	7.25	244.95	11	0.991	0.648	18.159	1	1	0.98018	19.1	19.2	12.5	349.2	112.03	164.93	90.56	85.9	3.89004e+06	4.07779e+06	2.58681e+07	4.11603e+06	4.05572e+06	2.48441e+08	2.12103e+06	2.66815e+06	1.02368e+07	2.14164e+08	3.70021e+07	7.47435e+07	High	High	High	High	High	Peak Found	High
FALSE	High	Master Protein	Glyma.02G294500.1.p	PTHR11624:SF56 - PYRUVATE DEHYDROGENASE E1 COMPONENT SUBUNIT BETA, MITOCHONDRIAL (1 of 3)	0	114.946	34	10	122	1	3	360	38.7	5.96	358.49	10	5.197	4.125	2.542	0.231635	0.347301	0.345824	161.6	31.1	128.3	79	20.67	11.49	63.89	53.82	8.43243e+07	1.2489e+08	1.22978e+08	2.66467e+07	2.3662e+07	2.11796e+07	9.76149e+07	3.16607e+07	1.50667e+08	6.01403e+07	1.28847e+08	5.00371e+07	High	High	High	High	High	Not Found	High
FALSE	High	Master Protein	Glyma.01G214300.1.p	PTHR31032:SF1 - PGR5-LIKE PROTEIN 1A, CHLOROPLASTIC-RELATED (1 of 4)	0	114.897	33	10	61	4	5	316	35.4	5.08	194.16	10	1.547	1.724	1.661	1	0.754081	1	104.3	67.4	116.3	112	28.73	30.46	41.25	62.94	4.12006e+08	3.63927e+08	6.14902e+08	2.66252e+08	2.94712e+08	1.56714e+08	4.18843e+08	4.59145e+08	8.48714e+08	4.42273e+08	5.90918e+08	1.18401e+08	High	High	High	High	High	Peak Found	High
FALSE	High	Master Protein	Glyma.13G336100.1.p	PTHR15371:SF2 - OUTER ENVELOPE PORE PROTEIN 16-1, CHLOROPLASTIC (1 of 3)	0	114.896	43	5	46	0	3	143	15.3	8.63	195.39	5	0.945	0.934	0.703	1	1	1	105.5	111.6	104.3	78.5	12.91	53	51.52	93.37	4.89594e+07	3.86798e+07	4.03875e+07	3.7229e+07	4.27287e+07	9.2544e+07	3.99281e+07	4.71434e+07	1.40995e+07	9.15871e+07	1.21894e+07	3.0051e+07	High	High	High	High	High	Peak Found	High
FALSE	High	Master Protein	Glyma.12G081500.1.p	PTHR21368:SF18 - 39S RIBOSOMAL PROTEIN L9, MITOCHONDRIAL (1 of 2)	0	114.893	53	13	174	0	4	197	22.1	9.92	502.46	13	2.011	1.833	1.817	0.0627815	0.0608829	0.111296	120.8	60	110.1	109.1	12.55	16.54	5.62	17.62	6.6207e+07	7.19337e+07	5.59125e+07	3.09484e+07	3.29171e+07	4.18888e+07	6.03499e+07	6.48288e+07	5.80859e+07	6.32709e+07	5.98205e+07	4.47366e+07	High	High	High	High	High	High	High
FALSE	High	Master Protein	Glyma.20G231600.1.p	PTHR30373:SF2 - UPF0603 PROTEIN YGCG (1 of 2)	0	114.844	43	12	187	2	2	293	31.8	8.73	581.68	12	0.921	1.064	0.304	1	1	0.827925	112	121.6	129.4	37	60.5	41.78	71.6	39.57	4.72382e+07	3.27002e+07	1.08589e+07	3.54967e+07	4.76014e+07	1.92073e+07	5.92e+07	37774485	8.86375e+06	1.84564e+07	1.07923e+07	8.95612e+06	High	High	High	High	High	High	High
FALSE	High	Master Protein	Glyma.01G034000.1.p	PTHR31907:SF1 - MLP-LIKE PROTEIN 423-RELATED (1 of 2)	0	114.804	71	14	160	4	4	153	17	5.12	373.05	14	1.098	1.766	3.825	1	1	0.786647	57.1	52	91.8	199	14.65	107.14	20.33	26.89	2.1728e+07	2.38813e+07	2.88156e+07	1.67441e+07	2.17432e+07	1.12608e+08	4.34721e+07	2.87189e+07	3.8388e+07	8.31697e+07	5.61076e+07	9.80786e+07	High	High	High	High	High	High	High
FALSE	High	Master Protein	Glyma.09G255500.1.p	K02931 - large subunit ribosomal protein L5 (RP-L5, MRPL5, rplE) (1 of 2)	0	114.656	48	10	197	2	2	267	29.1	10.02	583.43	10	0.638	1.053	1.359	0.753084	1	1	63	98.8	104	134.2	28.1	42.12	4.39	15.08	2.26249e+07	3.40889e+07	2.06695e+07	3.1729e+07	3.54512e+07	6.5759e+07	3.92919e+07	3.73415e+07	3.60135e+07	4.8166e+07	3.8924e+07	5.27206e+07	High	High	Peak Found	High	High	High	High
FALSE	High	Master Protein	Glyma.02G019600.1.p	PTHR11220:SF25 - F3F9.4 (1 of 6)	0	114.568	37	10	89	3	3	234	26	7.77	325.4	10	2.039	1.639	1.098	0.250242	0.342656	1	141.2	69.3	113.5	76.1	12.7	12.67	39.84	14.35	2.78802e+07	3.59235e+07	3.14189e+07	1.45901e+07	1.54121e+07	1.84739e+07	1.97728e+07	4.195e+07	2.52592e+07	1.69291e+07	2.14993e+07	1.68999e+07	High	High	High	High	High	High	High
FALSE	High	Master Protein	Glyma.15G219100.1.p	PTHR31810:SF6 - METACASPASE-4-RELATED (1 of 4)	0	114.479	37	15	98	3	3	415	45.2	5	277.09	15	0.043	0.176	0.341	0.000800998	0.00796263	0.046203	11.1	256.4	45.1	87.4	36.66	6.09	28.43	26.37	1.21651e+06	2.28159e+06	1.31615e+06	2.79123e+07	3.03786e+07	3.14666e+07	4.53333e+06	7.74404e+06	5.3432e+06	1.0348e+07	7.93735e+06	1.35108e+07	Peak Found	Peak Found	Peak Found	Not Found	Not Found	High	Not Found
FALSE	High	Master Protein	Glyma.11G001000.1.p	PTHR13844:SF8 - EXPRESSED PROTEIN (1 of 2)	0	114.399	39	7	91	0	7	148	16.5	9.54	201.73	7	1.389	1.144	2.551	1	1	0.744298	91.3	65.8	75.2	167.7	31.05	84.03	29.24	37.03	1.3211e+08	1.33775e+08	2.20027e+08	8.42971e+07	9.6312e+07	3.45186e+08	9.57816e+07	1.10156e+08	1.64208e+08	2.4566e+08	2.31346e+08	4.32562e+08	High	High	High	High	High	High	High
FALSE	High	Master Protein	Glyma.02G005200.1.p	PTHR11732:SF255 - ARYL-ALCOHOL DEHYDROGENASE YPL088W-RELATED (1 of 1)	0	114.366	35	11	88	11	11	421	47.1	7.06	261.29	11	1.418	0.959	1.017	1	1	1	129.1	91	87.3	92.6	23.92	25.92	22.42	16.81	9.16762e+07	8.2634e+07	1.28186e+08	6.34779e+07	6.46496e+07	9.78643e+07	4.96823e+07	6.19697e+07	7.79471e+07	6.57634e+07	7.62933e+07	5.42999e+07	High	High	Peak Found	High	High	Peak Found	High
FALSE	High	Master Protein	Glyma.13G280300.1.p	K02932 - large subunit ribosomal protein L5e (RP-L5e, RPL5) (1 of 5)	0	114.359	37	11	78	0	1	298	34	9.35	246.05	11	0.773	0.471	0.283	1	1	1	122.4	158.3	74.6	44.8	12.4	72.44	27.55	13.24	1.16316e+07	1.46468e+07	1.22518e+07	1.58443e+07	1.66201e+07	1.88285e+06	7.46585e+06	9700849	5.53475e+06	3.63219e+06	4.48327e+06	4.70339e+06	High	High	Not Found	High	High	Peak Found	High
FALSE	High	Master Protein	Glyma.16G028500.1.p	PF11210 - Protein of unknown function (DUF2996) (DUF2996) (1 of 2)	0	114.301	46	9	102	4	5	213	23.1	9.28	334.25	9	0.586	0.476	0.273	1	1	1	100.4	171.3	81.6	46.7	23.02	69.64	60.34	64.58	1.00556e+08	6.34952e+07	7.87271e+07	1.43514e+08	1.34373e+08	1.95958e+07	3.93665e+07	6.40186e+07	1.30221e+08	3.66181e+07	7.28075e+07	1.86744e+07	High	High	High	High	High	High	High
FALSE	High	Master Protein	Glyma.11G076000.1.p	K02938 - large subunit ribosomal protein L8e (RP-L8e, RPL8) (1 of 4)	0	114.237	34	7	108	0	1	261	28.2	10.81	370.71	7	1.23	0.975	0.376	1	1	0.217196	137.4	111.7	108.9	42	19.47	9.32	52.9	19.89	1.57632e+07	2.333e+07	2.13439e+07	1.66514e+07	1.73545e+07	1.98364e+07	5.20182e+06	17843043	1.6922e+07	7.9213e+06	6.53196e+06	5.30346e+06	High	High	Not Found	High	High	High	High
FALSE	High	Master Protein	Glyma.06G118000.1.p	PF10664 - Cyanobacterial and plastid NDH-1 subunit M (NdhM) (1 of 2)	0	114.198	39	9	142	5	5	218	25.3	5.71	448.91	9	1.025	1.183	0.652	1	1	1	106.2	103.7	122.6	67.5	26.48	39.56	52.67	31.33	1.15461e+08	9.98685e+07	1.64079e+08	1.43073e+08	1.12652e+08	6.05983e+07	1.33221e+08	6.46064e+07	2.06586e+08	7.33962e+07	1.20713e+08	7.1844e+07	High	High	High	High	High	High	High
FALSE	High	Master Protein	Glyma.05G056400.1.p	PTHR10683:SF10 - TRANSALDOLASE-LIKE PROTEIN (1 of 2)	0	114.197	36	14	108	8	8	398	43.5	6.86	281.67	14	2.233	1.584	1.679	0.982853	0.613359	0.87522	137.5	61.6	97.5	103.4	34.53	25.66	58.24	30.97	6.64235e+07	1.12282e+08	1.38595e+08	4.03466e+07	5.02907e+07	6.70284e+07	7.56903e+07	7.96591e+07	1.9566e+08	6.30534e+07	1.17326e+08	8.44346e+07	High	High	High	High	High	Peak Found	High
FALSE	High	Master Protein	Glyma.07G060700.1.p	PTHR33222:SF4 - PROTEIN CURVATURE THYLAKOID 1A, CHLOROPLASTIC (1 of 2)	0	114.111	34	9	133	0	9	163	17.7	9.42	371.4	9	0.925	1.046	0.292	1	1	1	113.4	122.6	128.2	35.8	24.27	66.84	19.74	62.33	1.02864e+09	6.52005e+08	7.44818e+08	8.05453e+08	9.63695e+08	1.54852e+08	8.42255e+08	1.12835e+09	7.91263e+08	2.0717e+08	5.93175e+08	2.35389e+08	High	High	High	High	High	High	High
FALSE	High	Master Protein	Glyma.07G073100.1.p	PF03766 - Remorin, N-terminal region (Remorin_N) (1 of 8)	0	113.937	66	18	141	10	10	198	21.6	8.43	363.21	18	1.853	1.955	2.008	1	1	0.597761	108.8	58.7	114.7	117.8	30.8	70.41	40	25.01	1.0749e+08	1.4032e+08	1.97872e+08	3.35144e+07	7.57211e+07	1.56084e+08	8.86841e+07	1.48005e+08	2.06983e+08	1.49137e+08	2.26787e+08	1.52045e+08	High	High	High	High	High	High	High
FALSE	High	Master Protein	Glyma.18G064400.1.p	K11254 - histone H4 (H4) (1 of 20)	0	113.92	44	8	127	1	1	97	10.8	11.36	394.58	8	1.445	1.205	0.01	1	1		158.3	109.6	132.1		48.2	4.08	132.78		1.06875e+06	1.81481e+06	2.92277e+06	1.16958e+06	1.25605e+06	1.25662e+06	1.51411e+06	1240990	1.49438e+07				Peak Found	Peak Found	Peak Found	Peak Found	Peak Found	Not Found	Peak Found
FALSE	High	Master Protein	Glyma.12G162300.1.p	K02968 - small subunit ribosomal protein S20 (RP-S20, rpsT) (1 of 2)	0	113.914	30	10	159	5	5	180	19.9	10.48	496.35	10	0.615	0.849	1.602	1	1	1	60.5	98.4	83.5	157.6	19.73	76.53	25.18	19.42	5.73186e+07	7.89735e+07	5.66729e+07	7.16945e+07	9.31725e+07	2.76624e+08	5.54579e+07	9.33309e+07	7.90687e+07	1.49261e+08	1.30531e+08	1.89997e+08	High	High	High	High	High	High	High
FALSE	High	Master Protein	Glyma.09G258000.1.p	K13034 - L-3-cyanoalanine synthase/ cysteine synthase (ATCYSC1) (1 of 2)	0	113.759	35	11	105	0	10	373	40.1	7.56	264.85	11	0.967	0.887	0.936	1	1	1	102.1	105.5	93.6	98.8	8.1	17.62	8.95	40.14	2.15048e+08	1.94375e+08	1.83526e+08	2.13889e+08	2.00938e+08	1.50967e+08	1.67886e+08	1.99814e+08	1.78289e+08	1.27234e+08	2.86898e+08	1.88105e+08	High	High	High	High	High	High	High
FALSE	High	Master Protein	Glyma.09G185500.1.p	PF00257 - Dehydrin (Dehydrin) (1 of 7)	0	113.7	54	8	21	8	8	253	26.6	6.8	95.42	8	0.754	1.646	13.381	1	0.687813	0.00186443	18	23.8	39.2	319	17.07	46.98	23.3	21.8	1.63064e+07	1.74889e+07	1.24571e+07	1.54683e+07	2.16273e+07	3.82882e+07	3.56044e+07	3.35144e+07	5.05564e+07	2.89405e+08	2.0581e+08	3.20407e+08	Peak Found	Peak Found	Peak Found	Peak Found	Peak Found	Peak Found	Peak Found
FALSE	High	Master Protein	Glyma.08G047800.1.p	K00133 - aspartate-semialdehyde dehydrogenase (asd) (1 of 2)	0	113.66	35	9	60	4	4	379	41.4	6.8	218.4	9	1.056	0.5	0.764	1	0.117673	0.60121	127.2	120.5	60.2	92.1	7.82	28.3	9.38	36.32	3.39739e+07	2.90497e+07	3.19759e+07	2.83221e+07	3.02819e+07	4.63712e+07	1.68659e+07	1.40128e+07	1.51263e+07	3.19711e+07	1.49984e+07	2.31441e+07	High	High	High	High	High	Peak Found	Peak Found
FALSE	High	Master Protein	Glyma.20G168100.1.p	K02925 - large subunit ribosomal protein L3e (RP-L3e, RPL3) (1 of 4)	0	113.536	37	16	82	2	2	389	44.4	10.15	193.53	16	0.01	0.23	0.01		0.0978437			325.3	74.7			32.73	45.05					6.28792e+06	1.2452e+07	9.52134e+06	953473	2.1852e+06	2.62112e+06				High	High	Not Found	High	High	Not Found	Peak Found
FALSE	High	Master Protein	Glyma.10G155000.1.p	K01875 - seryl-tRNA synthetase (SARS, serS) (1 of 3)	0	113.517	41	16	93	4	4	447	51.3	6.43	198.13	16	2.862	2.259	3.634	0.00316144	0.00658842	0.000577221	117.3	41	92.6	149	14.88	14.42	10.41	9.88	1.55298e+07	1.31216e+07	1.15694e+07	4.5849e+06	3.90356e+06	5.22104e+06	1.17261e+07	1.03571e+07	9.55465e+06	1.6324e+07	1.66633e+07	1.94717e+07	High	High	High	High	High	High	Not Found
FALSE	High	Master Protein	Glyma.05G051300.1.p	PTHR31032:SF1 - PGR5-LIKE PROTEIN 1A, CHLOROPLASTIC-RELATED (1 of 4)	0	113.265	40	11	74	4	4	321	35.6	4.83	221.63	11	0.943	0.767	0.476	1	1	0.88759	118.4	125.6	96.3	59.7	32.72	45.74	30.89	38.73	7.37751e+07	6.06763e+07	1.1248e+08	7.82483e+07	1.03092e+08	3.71387e+07	6.0041e+07	5.39276e+07	9.36285e+07	3.72133e+07	6.07257e+07	2.91481e+07	High	High	High	High	High	High	High
FALSE	High	Master Protein	Glyma.04G202900.1.p	K08054 - calnexin (CANX) (1 of 3)	0	112.881	28	13	82	0	3	579	66.1	4.89	238.12	13	0.857	0.717	1.066	1	1	1	94.1	109.9	78.8	117.1	51.44	82.67	46.98	75.13	4.90764e+07	5.63709e+07	1.69299e+07	4.31492e+07	5.72974e+07	1.86769e+08	4.10858e+07	77568800	3.29944e+07	1.11506e+08	1.6747e+07	6.10741e+07	High	High	High	High	High	High	High
FALSE	High	Master Protein	Glyma.10G058000.1.p	K00856 - adenosine kinase (E2.7.1.20, ADK) (1 of 3)	0	112.826	47	9	70	3	3	341	37.5	5.47	242.91	9	0.767	0.714	0.387	1	1	0.413711	107	139.5	99.6	53.9	35.75	40.97	17.03	40.51	8.33969e+06	1.16239e+07	5.54953e+06	1.14434e+07	1.08728e+07	4.77056e+06	7.94483e+06	7.76689e+06	5.75148e+06	4.20348e+06	5.23186e+06	2.15664e+06	High	High	High	High	High	Peak Found	High
FALSE	High	Master Protein	Glyma.10G236300.1.p	PF03766 - Remorin, N-terminal region (Remorin_N) (1 of 8)	0	112.705	58	14	111	8	8	194	21.5	5.83	323	14	1.186	1.03	0.761	1	1	0.880042	119.3	100.6	103.6	76.5	31.33	9.83	29.07	26.45	1.82866e+08	1.87778e+08	3.07985e+08	1.58293e+08	1.40455e+08	1.71103e+08	1.62985e+08	1.00798e+08	1.84397e+08	8.03374e+07	1.38915e+08	1.20394e+08	High	High	High	High	High	High	High
FALSE	High	Master Protein	Glyma.11G030100.1.p	PTHR23050:SF214 - CALCIUM-BINDING PROTEIN CML14-RELATED (1 of 3)	0	112.658	84	13	190	4	4	147	16.5	4.88	519.07	13	3.482	2.385	3.051	0.280461	0.683375	0.258977	140.4	40.3	96.2	123.1	24.15	34.62	39.56	29.22	1.20939e+08	7.52021e+07	1.16143e+08	3.33548e+07	2.72809e+07	5.22656e+07	4.03368e+07	7.9547e+07	9.55643e+07	6.02883e+07	1.01781e+08	1.09429e+08	Peak Found	Peak Found	High	High	High	High	Peak Found
FALSE	High	Master Protein	Glyma.04G014500.1.p	PTHR31407:SF17 - PSBP DOMAIN-CONTAINING PROTEIN 3, CHLOROPLASTIC (1 of 2)	0	112.532	41	9	89	0	5	255	28.5	6.9	298.81	9	1.332	1.048	0.679	1	1	1	131.3	98.6	103.3	66.9	31.32	31.24	27.95	22.63	7.43151e+07	9.15737e+07	4.73917e+07	7.63128e+07	5.57943e+07	4.04959e+07	3.76741e+07	6.73447e+07	5.84832e+07	3.63176e+07	5.37497e+07	3.78667e+07	High	High	High	High	High	High	High
FALSE	High	Master Protein	Glyma.11G192500.1.p	PTHR21368:SF18 - 39S RIBOSOMAL PROTEIN L9, MITOCHONDRIAL (1 of 2)	0	112.408	53	12	172	3	3	198	22.2	9.89	536.66	12	1.329	2.519	3.1	1	0.30507	0.281463	66.9	50.3	126.8	156	80.31	9.73	41.74	19.9	5.29936e+07	8.12932e+07	2.3803e+08	6.11503e+07	5.18601e+07	6.21637e+07	1.54024e+08	1.36496e+08	2.82501e+08	1.3734e+08	2.04464e+08	1.89551e+08	High	High	High	High	High	High	High
FALSE	High	Master Protein	Glyma.12G183100.1.p	1.1.1.184//1.1.1.72 - Carbonyl reductase (NADPH) / Xenobiotic ketone reductase (1 of 2)	0	112.383	37	11	106	0	2	388	43.6	7.9	291.05	11	1.277	1.164	1.433	1	0.951733	0.772727	104.8	82.1	95.5	117.6	35.9	33.04	58.18	6.67	3.34143e+07	2.85987e+07	5.48738e+07	2.61573e+07	2.77146e+07	1.40502e+07	2.39676e+07	30450209	6.79202e+07	3.55678e+07	3.74801e+07	4.0574e+07	High	High	High	High	High	Peak Found	High
FALSE	High	Master Protein	Glyma.19G177200.1.p	PTHR11260//PTHR11260:SF222 - GLUTATHIONE S-TRANSFERASE, GST, SUPERFAMILY, GST DOMAIN CONTAINING // SUBFAMILY NOT NAMED (1 of 7)	0	112.36	63	11	79	9	9	207	23.5	5.3	219.26	11	1.424	2.141	2.452	1	1	0.730171	81.2	57	122	139.8	40.07	58.68	37.56	12.92	4.35572e+07	4.65215e+07	8.56034e+07	2.82391e+07	3.26708e+07	7.70261e+07	3.53992e+07	6.99368e+07	7.92753e+07	8.62289e+07	8.01176e+07	6.66264e+07	High	High	High	High	High	Peak Found	High
FALSE	High	Master Protein	Glyma.17G138300.2.p	PTHR11709:SF82 - MONOCOPPER OXIDASE-LIKE PROTEIN SKU5 (1 of 5)	0	112.315	24	12	93	2	2	592	66.7	9.26	298.6	12	0.906	0.85	0.488	1	1	1	111.7	123.3	104.8	60.2	16.09	53.79	13.82	35.93	2.44849e+07	2.2901e+07	1.77942e+07	2.52733e+07	2.77569e+07	7.76072e+06	2.14732e+07	1.67392e+07	2.15365e+07	1.17471e+07	2.14728e+07	1.23292e+07	High	Peak Found	High	Peak Found	Peak Found	Peak Found	High
FALSE	High	Master Protein	Glyma.04G075100.1.p	K01535 - H+-transporting ATPase (E3.6.3.6) (1 of 24)	0	112.312	22	17	58	0	4	951	104.4	6.93	149.02	17		100							400				21.12								2.47418e+06	1.92903e+06	1.63627e+06				High	Not Found	Not Found	High	High	Not Found	High
FALSE	High	Master Protein	Glyma.05G033500.1.p	1.2.1.8 - Betaine-aldehyde dehydrogenase / Betaine aldehyde oxidase (1 of 2)	0	112.184	39	14	68	14	14	488	52.8	5.4	208.56	14	0.939	0.957	0.492	1	1	0.165627	110.8	118.1	113	58.1	16.11	16.7	14.49	24.03	1.11283e+08	8.28581e+07	8.79708e+07	9.37126e+07	9.6144e+07	6.99714e+07	1.08549e+08	8.96927e+07	8.22643e+07	4.60951e+07	6.64109e+07	4.36199e+07	High	High	High	High	High	Peak Found	High
FALSE	High	Master Protein	Glyma.03G120900.2.p	K03626 - nascent polypeptide-associated complex subunit alpha (EGD2, NACA) (1 of 8)	0	112.135	75	8	94	1	1	197	21.4	4.5	361.12	8																											Not Found	Not Found	Not Found	Not Found	Not Found	Not Found	High
FALSE	High	Master Protein	Glyma.08G007900.1.p	K03428 - magnesium-protoporphyrin O-methyltransferase (E2.1.1.11, chlM, bchM) (1 of 2)	0	112.13	47	14	99	3	3	325	35.2	7.44	242.22	14	1.36	1.132	0.458	0.853508	1	0.00378509	137.7	101.3	114.7	46.4	13.3	5.62	6.81	16.65	3.36948e+07	2.64438e+07	3.35804e+07	2.46999e+07	2.61008e+07	2.33247e+07	2.9491e+07	2.57357e+07	2.79702e+07	8.42135e+06	1.15337e+07	1.13086e+07	High	High	High	High	High	Not Found	High
FALSE	High	Master Protein	Glyma.20G153600.1.p	5.4.2.5 - Phosphoglucomutase (glucose-cofactor) / Glucose-1-phosphate phosphotransferase (1 of 2)	0	112.072	31	13	71	0	3	628	68.4	6.35	229.96	13	0.31	0.227	0.01	0.0538118	0.0162983		80.7	260.2	59.1		26.36	43.87	11.3		1.19499e+06	709126	890477	2.87338e+06	2.81566e+06	5.73843e+06	652606	552730	691062				High	High	Not Found	High	High	Peak Found	Not Found
FALSE	High	Master Protein	Glyma.07G059600.1.p	PF11210 - Protein of unknown function (DUF2996) (DUF2996) (1 of 2)	0	111.977	50	8	89	4	4	214	23.2	8.92	308.95	8	0.853	1.094	0.51	1	1	0.113646	98.7	115.7	126.6	59	25.44	10.8	3.4	39.81	1.43799e+07	2.43321e+07	2.04135e+07	2.72351e+07	2.20254e+07	2.39439e+07	2.54437e+07	2.7222e+07	2.6195e+07	1.22023e+07	1.40009e+07	5.89142e+06	High	High	High	High	High	Peak Found	High
FALSE	High	Master Protein	Glyma.05G026200.1.p	1.3.1.83 - Geranylgeranyl diphosphate reductase / Geranylgeranyl reductase (1 of 3)	0	111.926	41	16	151	2	2	462	51.3	9.03	405.7	16	0.768	0.675	0.563	1	1	1	102.2	133.1	89.8	74.9	35.8	47.59	23.97	26.7	3.71409e+06	7.3388e+06	4.67932e+06	8.51092e+06	6.09404e+06	2.95516e+06	3.33097e+06	4.11369e+06	5.35976e+06	3.43012e+06	3.26786e+06	5.17346e+06	High	High	Not Found	High	High	High	High
FALSE	High	Master Protein	Glyma.02G292500.1.p	2.3.1.61 - Dihydrolipoyllysine-residue succinyltransferase / Succinyl-CoA:dihydrolipoate S-succinyltransferase (1 of 2)	0	111.912	31	12	130	1	1	464	50.5	9.23	385.88	12	1.176	1.815	0.869	1	1	1	96.8	82.3	149.4	71.5	18.03	42.98	71.91	17.84	2.09684e+07	2.92699e+07	2.2683e+07	1.92848e+07	3.10726e+07	1.31691e+07	4.24998e+07	3.49956e+07	5.08368e+06	1.5437e+07	2.15103e+07	1.67615e+07	High	High	Peak Found	High	High	High	High
FALSE	High	Master Protein	Glyma.09G039600.1.p	PTHR23316:SF22 - ARMADILLO/BETA-CATENIN-LIKE REPEATS-CONTAINING PROTEIN-RELATED (1 of 4)	0	111.822	24	9	62	1	1	531	58.6	5.26	182.8	9	1.051	1.722	0.966	1	0.288226	1	88.7	84.4	145.4	81.6	16.59	4.41	24.05	9.02	1.62464e+06	1.95479e+06	1.40724e+06	1.64864e+06	1.54638e+06	1.51659e+06	1.77049e+06	2663184	2.87433e+06	1.55598e+06	1.30488e+06	1.49453e+06	High	High	Not Found	Not Found	Not Found	Peak Found	High
FALSE	High	Master Protein	Glyma.11G101500.1.p	K11294 - nucleolin (NCL, NSR1) (1 of 11)	0	111.776	24	15	123	8	8	748	78.3	5.58	373.38	15	0.587	0.647	1.514	1	1	1	62.6	106.7	69	161.6	62.96	29.52	55.17	38.75	5.02542e+07	2.84536e+07	1.02428e+08	7.5825e+07	8.56068e+07	1.29595e+08	5.53666e+07	4.96394e+07	1.25873e+08	1.05551e+08	1.29648e+08	2.16478e+08	High	High	High	High	High	High	High
FALSE	High	Master Protein	Glyma.10G205500.1.p	K01595 - phosphoenolpyruvate carboxylase (ppc) (1 of 10)	0	111.732	20	18	57	12	17	1032	115.8	6.64	151.52	18	1.012	0.723	1.314	1	1	1	100	98.8	71.4	129.8	41.85	4.46	44.36	10.96	5.29389e+07	3.57865e+07	8.31393e+07	5.54787e+07	5.0861e+07	5.23157e+07	3.78104e+07	3.58509e+07	7.48187e+07	6.87647e+07	7.93631e+07	6.42538e+07	High	High	High	High	High	Peak Found	High
FALSE	High	Master Protein	Glyma.19G078900.1.p	K03231 - elongation factor 1-alpha (EEF1A) (1 of 8)	0	111.039	42	4	136	1	1	154	16.9	9.23	446.8	4	1.562	0.484	0.371	1	0.567477	0.273653	182.9	117.1	56.6	43.4	19.57	26.96	24.23	65.46	3.70879e+07	5.51936e+07	4.65451e+07	4.03817e+07	2.98028e+07	2.37057e+07	1.44172e+07	17782002	1.08331e+07	2.28839e+07	1.10551e+07	5.92232e+06	High	High	Not Found	High	High	High	High
FALSE	High	Master Protein	Glyma.03G195200.1.p	PTHR30314//PTHR30314:SF13 - CELL DIVISION PROTEIN FTSZ-RELATED // SUBFAMILY NOT NAMED (1 of 4)	0	110.94	37	11	63	2	2	475	50	7.31	210.39	11	0.664	0.572	7.134	1	1	0.523937	28.4	42.7	24.4	304.5	6.87	43.56	88.03	51.97	1.15717e+06	1.22866e+06	1.32651e+06	2.30028e+06	873515	1.84961e+06	69073.8	1.05846e+06	1.74731e+06	1.54534e+07	4.55529e+06	1.31957e+07	High	High	Not Found	High	Peak Found	Not Found	Not Found
FALSE	High	Master Protein	Glyma.02G295800.1.p	PTHR30314:SF12 - CELL DIVISION PROTEIN FTSZ HOMOLOG 1, CHLOROPLASTIC (1 of 4)	0	110.914	52	15	87	1	9	418	44	6.58	252.02	15	0.944	1.291	1.17	1	1	1	85.7	90.8	117.2	106.2	19.92	43.29	43.96	11.75	3.324e+08	2.67439e+08	2.23737e+08	2.83255e+08	2.95849e+08	1.16132e+08	4.63424e+08	3.65717e+08	1.74361e+08	3.40959e+08	3.31425e+08	2.72605e+08	High	High	High	High	High	High	High
FALSE	High	Master Protein	Glyma.08G047100.1.p	K02434 - aspartyl-tRNA(Asn)/glutamyl-tRNA(Gln) amidotransferase subunit B (gatB, PET112) (1 of 2)	0	110.662	32	14	70	0	2	549	61.2	8.56	176.73	14	2.751	1.227	3.601	0.100143	1	0.0173602	128.3	46.6	57.2	167.9	20.06	5.58	10.69	53.04	1.30956e+07	1.93301e+07	1.51311e+07	4.99686e+06	5.5011e+06	5.52419e+06	6.75189e+06	6.6049e+06	7.98999e+06	1.98075e+07	1.47341e+07	3.9519e+07	High	High	Peak Found	High	High	Peak Found	High
FALSE	High	Master Protein	Glyma.03G168700.1.p	1.1.1.1//1.1.1.284//1.2.1.1 - Alcohol dehydrogenase / Aldehyde reductase // S-(hydroxymethyl)glutathione dehydrogenase / NAD-linked formaldehyde dehydrogenase (1 of 3)	0	110.567	45	11	74	0	11	379	40.3	6.76	260.46	11	0.956	0.615	0.455	1	0.0363895	0.00201274	126.4	132.2	81.3	60.2	3.99	5.48	10.98	15.35	1.34234e+08	1.25925e+08	1.24905e+08	1.31744e+08	1.22642e+08	1.36736e+08	9.24951e+07	8.10024e+07	7.45796e+07	4.66862e+07	6.30038e+07	5.99781e+07	High	High	High	High	High	High	High
FALSE	High	Master Protein	Glyma.10G220800.1.p	K15306 - Ran-binding protein 1 (RANBP1) (1 of 3)	0	110.486	38	6	100	0	3	218	24.2	4.83	364.65	6	1.532	1.941	2.026	1	1	1	94.3	61.5	119.5	124.7	39.45	69.42	21.69	33.51	5.82465e+07	7.65227e+07	1.24207e+08	4.81216e+07	4.99611e+07	1.47437e+08	9.69859e+07	9.43969e+07	1.36726e+08	6.95277e+07	1.38561e+08	1.01236e+08	High	High	High	High	High	High	High
FALSE	High	Master Protein	Glyma.13G163700.1.p	PTHR30508:SF1 - UPF0051 PROTEIN ABCI8, CHLOROPLASTIC-RELATED (1 of 3)	0	110.356	25	12	59	2	12	544	60.6	6.58	172.97	12	1.239	1.895	2.641	1	1	0.977286	73.2	59	111.9	155.9	14.19	83.68	79.14	16.53	5.93686e+08	7.9053e+08	6.97419e+08	5.08723e+08	5.62911e+08	2.03679e+09	8.04595e+08	1.06687e+09	3.27748e+09	1.3848e+09	1.8806e+09	1.48638e+09	High	High	High	High	High	Peak Found	High
FALSE	High	Master Protein	Glyma.20G024800.1.p	PTHR11817:SF5 - PYRUVATE KINASE-RELATED (1 of 4)	0	110.123	30	10	70	1	9	502	54.3	7.2	214.4	10	1.535	1.248	0.572	0.428178	1	0.076941	141	91.9	114.6	52.5	10.83	20.33	8.79	21.82	1.00793e+08	1.09548e+08	1.247e+08	7.13796e+07	8.98777e+07	6.01663e+07	9.11989e+07	7.71884e+07	8.90577e+07	3.20767e+07	4.99445e+07	4.08335e+07	High	High	High	High	High	Peak Found	High
FALSE	High	Master Protein	Glyma.07G073800.1.p	K15095 - (+)-neomenthol dehydrogenase (E1.1.1.208) (1 of 12)	0	110.031	55	14	86	2	11	298	32.2	6.8	261.18	14	0.774	0.774	0.818	1	1	1	92	118.8	92	97.2	17.15	6.91	50	26.88	7.31171e+07	6.62769e+07	9.1814e+07	9.44944e+07	1.00656e+08	8.76277e+07	7.31603e+07	7.17634e+07	1.60682e+08	7.34011e+07	1.16689e+08	7.72783e+07	High	High	High	High	High	Peak Found	High
FALSE	High	Master Protein	Glyma.12G207600.1.p	PTHR32077:SF6 - FASCICLIN-LIKE ARABINOGALACTAN PROTEIN 13-RELATED (1 of 2)	0	109.941	44	10	220	2	2	250	26.3	9.11	600.54	10	16.199	34.877	43.848	0.885715	0.178411	0.107683	67.5	4.2	145.4	182.8	108.66	59.17	36.29	17.09	9.63872e+06	1.53474e+08	4.36549e+08	8.48804e+06	9.47435e+06	2.29232e+07	3.30433e+08	1.71595e+08	3.71848e+08	4.27953e+08	4.1543e+08	3.08554e+08	High	High	High	High	High	High	High
FALSE	High	Master Protein	Glyma.19G190800.1.p	PTHR10430:SF16 - PEROXIREDOXIN-5, MITOCHONDRIAL (1 of 2)	0	109.746	39	7	175	3	7	215	23	7.96	678.73	7	1.041	1.276	1.828	1	1	0.781655	81	77.7	99.2	142.1	17.1	50.52	31.62	23.31	5.59088e+08	5.68443e+08	7.48794e+08	5.45908e+08	5.20008e+08	1.19088e+09	6.71584e+08	6.96592e+08	1.14174e+09	1.41171e+09	9.97892e+08	9.3288e+08	High	High	High	High	High	High	High
FALSE	High	Master Protein	Glyma.04G233500.1.p	PTHR14136:SF11 - THYLAKOID LUMENAL 17.4 KDA PROTEIN, CHLOROPLASTIC (1 of 2)	0	109.745	51	11	237	4	4	240	25.7	6.07	696.79	11	0.789	0.969	2.677	1	1	1	58.1	73.6	71.3	197	60	102.35	45.95	42.91	1.41576e+07	2.542e+07	4.88109e+07	2.11371e+07	3.22068e+07	1.41269e+08	2.00592e+07	3.12183e+07	5.09886e+07	8.62158e+07	5.99011e+07	1.40237e+08	High	High	High	High	High	High	High
FALSE	High	Master Protein	Glyma.06G051200.1.p	K13210 - far upstream element-binding protein (FUBP) (1 of 4)	0	109.695	24	10	94	3	8	554	58.2	5.57	272.5	10	1.536	2.14	2.658	1	0.381735	0.0643545	83.8	54.5	116.7	145	17.31	35.58	24.93	7.36	7.09481e+07	5.11609e+07	5.6177e+07	3.27891e+07	3.65815e+07	6.13324e+07	5.33569e+07	8.91486e+07	7.83005e+07	9.51864e+07	9.72255e+07	1.08895e+08	High	High	High	High	High	High	High
FALSE	High	Master Protein	Glyma.08G232400.1.p	PTHR10891//PTHR10891:SF597 - EF-HAND CALCIUM-BINDING DOMAIN CONTAINING PROTEIN // SUBFAMILY NOT NAMED (1 of 5)	0	109.644	72	9	139	3	3	137	15.3	4.64	416.19	9	1.285	1.192	2.907	1	1	1	80.5	62.7	74.7	182.1	102.13	56.63	80.69	35.94	4.80911e+07	7.07721e+07	3.1381e+08	4.79411e+07	5.5097e+07	1.2621e+08	5.98533e+07	6.57013e+07	2.26893e+08	1.84959e+08	1.6015e+08	8.57736e+07	High	High	High	High	High	High	High
FALSE	High	Master Protein	Glyma.13G361400.1.p	K15918 - D-glycerate 3-kinase (GLYK) (1 of 2)	0	109.424	35	11	66	2	6	434	49.1	5.91	201.77	11	1.032	0.768	1.043	1	1	1	107.4	104.1	79.9	108.6	51.22	21.87	29.88	6.78	1.95712e+07	1.53543e+07	5.94149e+06	2.08745e+07	1.42788e+07	1.48784e+07	6.95891e+06	1.14197e+07	1.29736e+07	1.55248e+07	1.53131e+07	1.72927e+07	High	High	Peak Found	High	High	Not Found	High
FALSE	High	Master Protein	Glyma.06G020400.1.p	K02638 - plastocyanin (petE) (1 of 2)	0	109.36	41	4	504	2	2	167	16.8	5.2	2091.99	4	0.7	0.316	4.941	1	1	1	40.3	57.5	18.2	284.1	117.36	139.1	129.54	47.2	1.14558e+08	1.61947e+08	1.00694e+09	2.31301e+08	1.46546e+08	2.49428e+09	7.31481e+07	51364898	6.15012e+08	1.14278e+09	1.13841e+09	2.42238e+09	High	High	High	High	High	High	High
FALSE	High	Master Protein	Glyma.02G011800.1.p	PTHR10381:SF12 - ATP-DEPENDENT CLP PROTEASE PROTEOLYTIC SUBUNIT 5, CHLOROPLASTIC (1 of 5)	0	109.348	33	8	98	0	8	311	33.8	8.51	279.18	8	1.178	1.366	0.662	1	1	1	112	95.1	129.9	62.9	40.55	45.37	24.77	76.18	2.34044e+08	2.38888e+08	4.53252e+08	2.02768e+08	2.39261e+08	8.62799e+07	1.92155e+08	2.77081e+08	3.2026e+08	1.34165e+08	4.49447e+08	1.33743e+08	High	High	High	High	High	High	High
FALSE	High	Master Protein	Glyma.13G302100.1.p	PTHR34793:SF1 - PROTEIN THYLAKOID FORMATION 1, CHLOROPLASTIC (1 of 4)	0	109.133	40	12	97	2	2	297	33.8	8.53	272.62	12	0.937	0.675	0.825	1	1	1	109	116.4	78.6	96	10.83	17.31	44.46	20.32	3.93557e+07	3.52133e+07	4.3759e+07	4.20073e+07	4.41887e+07	3.14892e+07	2.83685e+07	2.77562e+07	5.71262e+07	3.46507e+07	3.14539e+07	4.58996e+07	High	High	High	High	High	Not Found	High
FALSE	High	Master Protein	Glyma.02G032300.1.p	PTHR31907:SF1 - MLP-LIKE PROTEIN 423-RELATED (1 of 2)	0	109.114	66	12	146	2	2	153	17.1	5.25	361	12	0.522	0.75	2.255	1	1	1	46.1	88.4	66.2	199.3	19.39	88.85	24.7	13.42	1.19152e+07	1.60665e+07	1.14315e+07	1.41172e+07	2.28477e+07	7.58611e+07	1.71248e+07	19633614	1.18043e+07	5.26383e+07	4.088e+07	5.15213e+07	High	High	Not Found	High	High	High	High
FALSE	High	Master Protein	Glyma.12G086800.1.p	3.1.3.2//3.1.3.48 - Acid phosphatase / Phosphomonoesterase // Protein-tyrosine-phosphatase / PTPase (1 of 2)	0	109.103	28	8	79	0	8	241	26.9	8.59	309.27	8	1.266	0.647	1.255	1	1	1	121.5	96	62.1	120.4	20.46	47.18	70.51	18.25	6.09158e+07	9.25152e+07	7.94268e+07	3.89337e+07	6.27447e+07	1.02489e+08	2.76623e+07	4.05704e+07	1.02859e+08	7.50359e+07	1.03834e+08	7.87152e+07	High	High	High	High	High	High	High
FALSE	High	Master Protein	Glyma.14G186900.2.p	PTHR11624:SF56 - PYRUVATE DEHYDROGENASE E1 COMPONENT SUBUNIT BETA, MITOCHONDRIAL (1 of 3)	0	109.028	38	9	110	2	2	360	38.6	5.96	337.97	9	3.042	1.96	0.727	0.00689509	0.0583749	0.342017	180.8	59.4	116.5	43.2	6.07	15.85	16.6	19.14	1.99415e+07	1.8299e+07	1.77676e+07	5.09634e+06	6.01534e+06	7.01089e+06	1.17879e+07	1.29036e+07	9.24066e+06	4.37369e+06	3.36058e+06	4.96213e+06	High	High	High	High	High	Not Found	High
FALSE	High	Master Protein	Glyma.07G215900.1.p	PF08263 - Leucine rich repeat N-terminal domain (LRRNT_2) (1 of 565)	0	108.961	24	10	138	7	7	449	49.8	8.79	443.16	10	0.967	0.826	0.509	1	1	1	117.1	121.2	100	61.7	47.42	18.07	26.79	65.74	3.4492e+08	3.864e+08	1.32045e+08	3.56824e+08	3.72837e+08	2.62299e+08	2.94584e+08	3.12955e+08	1.82582e+08	4.07943e+08	1.8168e+08	1.13573e+08	High	High	High	High	High	High	High
FALSE	High	Master Protein	Glyma.02G156800.1.p	PF00139 - Legume lectin domain (Lectin_legB) (1 of 90)	0	108.85	48	11	128	7	11	297	31.9	7.05	392.82	11	1.649	1.052	0.981	1	1	1	140.9	85.4	89.9	83.8	14.31	34.75	30.19	53.62	5.06104e+08	6.41124e+08	6.67464e+08	4.86014e+08	3.88837e+08	2.31943e+08	2.92747e+08	5.43031e+08	4.08929e+08	3.81522e+08	7.73983e+08	2.8771e+08	High	High	High	High	High	High	High
FALSE	High	Master Protein	Glyma.07G269600.1.p	K02958 - small subunit ribosomal protein S15e (RP-S15e, RPS15) (1 of 4)	0	108.772	47	4	62	0	1	158	17.6	10.4	231.69	4	100	100	100	0.387039	0.859792	0.610677	250.5	0.1	78	71.3	21.35	4.8	106.43	130.8	4.55966e+07	6.74787e+07	4.98824e+07	20325.3	20532.9	22164.5	1.55408e+07	11206.5	3.74137e+07	48438	6.80995e+07	1.42055e+07	Not Found	Not Found	High	Not Found	Not Found	Peak Found	Not Found
FALSE	High	Master Protein	Glyma.11G013900.2.p	PTHR10288:SF145 - P-ELEMENT SOMATIC INHIBITOR, ISOFORM C (1 of 3)	0	108.714	23	12	51	0	2	794	84.2	5.06	161.75	12	0.01	0.286	1.279		0.518746	0.903036		155.9	44.7	199.5		69.1	5.11	13.68				4.41875e+06	1.2284e+06	7.08676e+06	1.19366e+06	1.26556e+06	1.32221e+06	5.65318e+06	5.32089e+06	6.86595e+06	Not Found	High	Not Found	Not Found	High	High	Peak Found
FALSE	High	Master Protein	Glyma.13G370200.1.p	PTHR31096:SF16 - ACT DOMAIN-CONTAINING PROTEIN (1 of 4)	0	108.637	34	8	145	0	2	290	31.4	5.53	410.42	8	0.94	1.761	1.64	1	1	1	70.4	74.9	131.9	122.8	79.87	28.32	87.56	42.98	1.50362e+07	2.38156e+07	6.81979e+07	2.5338e+07	2.13755e+07	3.65246e+07	4.46328e+07	1.86757e+07	1.23249e+08	2.73164e+07	6.53835e+07	4.15529e+07	High	High	High	High	High	High	High
FALSE	High	Master Protein	Glyma.01G030500.1.p	PTHR11002:SF15 - CARBONIC ANHYDRASE (1 of 4)	0	108.633	46	10	80	1	6	278	30.3	6.4	280.87	10	1.83	0.932	1.954	1	1	1	128.1	70	65.2	136.7	72.36	24.92	114.63	69.38	2.46329e+07	5.12231e+07	1.13689e+08	2.79887e+07	2.15156e+07	3.56475e+07	2.60826e+07	2.24362e+07	1.66588e+08	2.26839e+07	1.07233e+08	5.46795e+07	High	High	High	High	High	Peak Found	High
FALSE	High	Master Protein	Glyma.14G058300.1.p	K04646 - clathrin heavy chain (CLTC) (1 of 8)	0	108.553	16	19	60	0	5	1700	192.4	5.44	167.15	19	100						400				4.06				5.77661e+06	5.4453e+06	5.34911e+06										High	Not Found	High	High	High	Not Found	Not Found
FALSE	High	Master Protein	Glyma.08G035400.1.p	PTHR10374//PTHR10374:SF12 - LACTOYLGLUTATHIONE LYASE GLYOXALASE I // SUBFAMILY NOT NAMED (1 of 4)	0	108.142	36	12	124	1	1	356	39.6	7.03	321.63	12	1.867	2.729	5.228	0.67546	0.331024	0.0621993	69	37	100.8	193.2	76.41	14.7	47.45	12.23	9.07087e+06	1.18829e+07	3.50728e+07	6.36399e+06	6.8454e+06	5.1072e+06	1.1326e+07	1.73669e+07	2.9369e+07	2.819e+07	3.32716e+07	3.60264e+07	High	High	Peak Found	Peak Found	Not Found	Not Found	High
FALSE	High	Master Protein	Glyma.05G157800.1.p	PTHR24089:SF266 - MITOCHONDRIAL DICARBOXYLATE/TRICARBOXYLATE TRANSPORTER DTC (1 of 2)	0	108.074	37	9	78	0	1	301	32	9.41	246.04	9	0.887	0.484	0.918	1	0.235041	1	107.9	121.6	58.9	111.7	31.17	21.47	16.59	11.28	7.9964e+06	4.28578e+06	5.72574e+06	7.0054e+06	4.54918e+06	6.45428e+06	3.8712e+06	3.1266e+06	2.81489e+06	6.32313e+06	5.92761e+06	5.05186e+06	High	High	Not Found	High	High	Not Found	High
FALSE	High	Master Protein	Glyma.02G046900.1.p	K03029 - 26S proteasome regulatory subunit N10 (PSMD4, RPN10) (1 of 4)	0	107.671	28	8	79	0	1	405	43	4.67	266.56	8	0.01	0.441	0.632		0.0143615	0.092239		192.9	85	122		14.91	13.49	13.3				3.74542e+06	4.28306e+06	5.03815e+06	1.51059e+06	1.95867e+06	1.88747e+06	3.00203e+06	2.2955e+06	2.709e+06	Not Found	Not Found	Not Found	Not Found	Not Found	High	Peak Found
FALSE	High	Master Protein	Glyma.12G048900.2.p	PTHR30560//PTHR30560:SF2 - TRIGGER FACTOR CHAPERONE AND PEPTIDYL-PROLYL CIS/TRANS ISOMERASE // SUBFAMILY NOT NAMED (1 of 1)	0	107.39	45	13	133	5	13	226	24.8	8.85	356.8	13	1.788	3.244	8.146	1	1	0.528976	50.5	28.2	91.5	229.8	108.81	100.71	73.45	35.8	1.4376e+08	1.77745e+08	9.7414e+08	8.87634e+07	9.93887e+07	4.8593e+08	3.22443e+08	2.67339e+08	9.43242e+08	4.94491e+08	8.09604e+08	1.05644e+09	High	High	High	High	High	High	High
FALSE	High	Master Protein	Glyma.01G181200.1.p	K11291 - nuclear autoantigenic sperm protein (NASP) (1 of 2)	0	107.003	40	16	81	3	3	475	50.3	4.5	210.74	16	0.265	1.416	0.663	0.0340097	1	0.96798	31.7	119.6	169.4	79.3	25.87	14.13	33.04	31.17	2.6027e+06	1.55826e+06	2.49129e+06	7.82692e+06	1.04097e+07	9.40156e+06	7.26105e+06	1.44216e+07	1.33148e+07	9.03729e+06	6.22883e+06	4.93157e+06	Peak Found	Peak Found	Not Found	Peak Found	Peak Found	High	Not Found
FALSE	High	Master Protein	Glyma.07G023000.1.p	PF01075 - Glycosyltransferase family 9 (heptosyltransferase) (Glyco_transf_9) (1 of 1)	0	106.965	32	11	82	1	1	467	51.6	5.71	187.95	11	0.832	0.423	0.01	1	0.823859		147.6	177.4	75		3.93	22.78	107.52		5.06877e+06	5.47196e+06	5.195e+06	8.90473e+06	6.24389e+06	6.0132e+06	332802	2639487	7.99394e+06				Peak Found	High	Not Found	High	Peak Found	Not Found	Peak Found
FALSE	High	Master Protein	Glyma.10G157100.1.p	PTHR30373:SF2 - UPF0603 PROTEIN YGCG (1 of 2)	0	106.847	43	11	181	1	1	293	31.7	8.31	567.53	11	1.024	1.165	0.262	1	1	0.950658	118.7	115.9	135	30.4	69.47	57.44	65.47	28.74	8.79428e+07	6.72385e+07	1.26877e+07	6.5658e+07	8.78921e+07	2.18762e+07	8.22533e+07	76465848	1.41903e+07	2.54164e+07	1.49419e+07	1.71914e+07	High	High	Peak Found	High	High	High	High
FALSE	High	Master Protein	Glyma.08G209700.1.p	K02265 - cytochrome c oxidase subunit 5b (COX5B) (1 of 3)	0	106.791	29	8	74	0	5	160	17.5	5.54	253.2	8	0.864	0.99	1.886	1	1	1	72.9	84.4	83.5	159.2	12.09	73	8.35	17.4	3.05088e+07	3.5048e+07	3.89223e+07	3.63985e+07	4.0556e+07	1.22434e+08	3.97943e+07	4.0151e+07	4.60362e+07	7.64959e+07	9.39483e+07	6.6792e+07	High	High	Peak Found	High	High	High	High
FALSE	High	Master Protein	Glyma.10G189500.1.p	PTHR24012:SF308 - PROTEIN Y55F3AM.3, ISOFORM A (1 of 2)	0	106.733	36	10	70	4	4	471	47.5	7.55	195.2	10	0.218	0.325	4.313	0.329417	0.16099	0.86556	14.9	68.3	22.2	294.6	41.62	112.5	53.55	8.82	2.48665e+06	1.33878e+06	1.21909e+06	5.47557e+06	6.14734e+06	3.81092e+07	595892	1.99654e+06	2.08214e+06	2.97647e+07	2.50988e+07	2.65112e+07	High	High	High	High	High	High	Peak Found
FALSE	High	Master Protein	Glyma.08G115600.1.p	PTHR24089:SF266 - MITOCHONDRIAL DICARBOXYLATE/TRICARBOXYLATE TRANSPORTER DTC (1 of 2)	0	106.63	37	9	72	1	1	301	32	9.35	241.1	9	1.156	1.42	0.01	0.928806	0.42156		129.3	111.9	158.9		22.93	28.66	7.36		1.38952e+07	9.02613e+06	1.02389e+07	8.85918e+06	9.1634e+06	5.18086e+06	1.1057e+07	12614018	1.25812e+07				Peak Found	Peak Found	Not Found	Peak Found	High	Not Found	Peak Found
FALSE	High	Master Protein	Glyma.05G129600.1.p	PTHR11712:SF226 - 3-OXOACYL-[ACYL-CARRIER-PROTEIN] SYNTHASE I, CHLOROPLASTIC (1 of 2)	0	106.545	32	9	61	1	1	469	49.7	7.71	191.37	9	1.491	1.581	0.679	1	0.976325	1	125.5	84.2	133.1	57.2	25.46	68.28	24.91	40.23	1.95573e+07	1.63713e+07	1.15527e+07	1.09808e+07	1.30189e+07	1.93137e+06	1.10132e+07	17357246	1.79518e+07	7.45761e+06	9.08952e+06	3.77138e+06	High	High	High	High	High	Peak Found	High
FALSE	High	Master Protein	Glyma.15G136800.1.p	K02945 - small subunit ribosomal protein S1 (RP-S1, rpsA) (1 of 6)	0	106.492	41	16	211	1	4	403	44.5	5.82	484.63	16	0.513	0.09	1.577	1	0.0352288	0.964672	64.5	125.8	11.4	198.3	25.15	3.89	88.51	31.33	7.85866e+06	1.29492e+07	9.81662e+06	1.99798e+07	1.84913e+07	1.91326e+07	1.26166e+06	6.14896e+06	1.72987e+06	4.63191e+07	3.01635e+07	2.60614e+07	High	High	High	High	High	High	High
FALSE	High	Master Protein	Glyma.19G113000.1.p	PTHR11588//PTHR11588:SF137 - TUBULIN // SUBFAMILY NOT NAMED (1 of 3)	0	106.467	30	12	82	0	3	451	49.9	5.1	249.15	12	0.855	0.407	0.803	1	1	1	111.6	130.5	53.1	104.8	103.21	18.87	106	17.43	4.40066e+06	7.04041e+06	3.07689e+07	8.23639e+06	6.91735e+06	1.00767e+07	1.09061e+06	3352128	1.22438e+07	8.52108e+06	6.60997e+06	6.19953e+06	High	High	High	High	High	Not Found	Peak Found
FALSE	High	Master Protein	Glyma.08G042300.1.p	K02958 - small subunit ribosomal protein S15e (RP-S15e, RPS15) (1 of 4)	0	106.457	45	4	67	0	1	166	18.6	10.21	244	4	7.921	13.595	3.424	1	0.292516	0.811671	122.1	15.4	209.6	52.8	84.45	2.24	40.77	124.81	3.90871e+07	5.34756e+06	6.94064e+07	5.11372e+06	4.93462e+06	4.90862e+06	9.92918e+07	42657859	6.70866e+07	5.5013e+06	9.57913e+07	1.68964e+07	Not Found	Peak Found	High	Not Found	Peak Found	Not Found	High
FALSE	High	Master Protein	Glyma.11G093200.1.p	1.8.7.1 - Assimilatory sulfite reductase (ferredoxin) / Sulfite reductase (ferredoxin) (1 of 2)	0	106.436	29	16	57	5	5	687	77.2	9.16	133.73	16	0.832	0.46	0.072	0.589265	0.00240858	2.37667e-05	140.7	169.2	77.8	12.2	8.43	1.16	13.08	8.04	1.8274e+07	1.64384e+07	1.94586e+07	2.19693e+07	2.17365e+07	2.2245e+07	1.15761e+07	8.91374e+06	1.01076e+07	1.58881e+06	1.39955e+06	1.63233e+06	High	High	Peak Found	High	High	Not Found	High
FALSE	High	Master Protein	Glyma.10G065000.1.p	PTHR11817//PTHR11817:SF33 - PYRUVATE KINASE // SUBFAMILY NOT NAMED (1 of 9)	0	106.412	37	16	64	0	11	527	57.6	7.5	135.95	16	0.802	0.506	0.501	1	0.246702	0.0974327	114.2	142.4	72	71.3	35.74	9	12.95	18.59	5.40478e+07	4.20436e+07	2.52668e+07	4.87042e+07	5.24279e+07	5.81949e+07	3.28149e+07	2.65213e+07	2.63061e+07	2.62522e+07	2.84603e+07	1.96111e+07	High	High	Peak Found	High	High	Not Found	High
FALSE	High	Master Protein	Glyma.19G192800.2.p	2.4.1.18 - 1,4-alpha-glucan branching enzyme / Glycogen branching enzyme (1 of 6)	0	106.319	27	20	73	1	3	868	98.8	5.64	140.85	20	1.638	1.137	1.664	1	1	1	120.5	73.5	83.6	122.4	95.15	15.42	88.15	85.94	1.51661e+07	5.15862e+06	4.49676e+07	8.38819e+06	9.25865e+06	1.12867e+07	1.05268e+07	2155393	2.29802e+07	1.58841e+06	2.6389e+07	1.54034e+07	High	High	Peak Found	High	High	Peak Found	Not Found
FALSE	High	Master Protein	Glyma.07G035000.1.p	PTHR23151//PTHR23151:SF59 - DIHYDROLIPOAMIDE ACETYL/SUCCINYL-TRANSFERASE-RELATED // SUBFAMILY NOT NAMED (1 of 2)	0	106.126	38	17	102	0	7	547	59.4	7.91	199.82	17	1.583	1.611	1.434	0.16302	0.166024	0.221892	112.5	71.1	114.5	101.9	3.71	23.08	18.01	17.23	3.30284e+07	3.25794e+07	3.49197e+07	2.08665e+07	2.09099e+07	1.35194e+07	3.36122e+07	3.62032e+07	2.52783e+07	2.42229e+07	2.99238e+07	3.43618e+07	High	High	High	High	High	Peak Found	High
FALSE	High	Master Protein	Glyma.05G020900.2.p	K12741 - heterogeneous nuclear ribonucleoprotein A1/A3 (HNRNPA1_3) (1 of 20)	0	105.759	49	9	99	5	5	274	28.2	4.97	371.61	9	1.21	0.817	1.485	1	1	0.298407	107.2	88.6	72.5	131.7	6.74	30.76	7.44	16.38	7.1871e+07	7.96582e+07	7.03764e+07	4.30052e+07	5.941e+07	8.04031e+07	4.34547e+07	4.85563e+07	5.02265e+07	7.97109e+07	8.823e+07	1.09119e+08	High	High	High	High	High	High	High
FALSE	High	Master Protein	Glyma.06G138700.1.p	K02940 - large subunit ribosomal protein L9e (RP-L9e, RPL9) (1 of 4)	0	105.692	56	10	85	6	6	192	21.7	9.42	253.51	10	1.664	2.327	1.232	0.903404	0.521513	1	107	64.3	149.6	79.2	32.6	12.38	33.84	44.47	9.28259e+07	1.11227e+08	1.70733e+08	7.19806e+07	6.68355e+07	5.62033e+07	8.24523e+07	1.55538e+08	1.66211e+08	8.23665e+07	1.3711e+08	5.69281e+07	High	High	Peak Found	High	High	High	High
FALSE	High	Master Protein	Glyma.17G100700.1.p	1.3.1.83 - Geranylgeranyl diphosphate reductase / Geranylgeranyl reductase (1 of 3)	0	105.606	38	15	141	1	1	462	51.2	9.04	382.36	15	0.98	0.543	0.73	1	0.400613	1	120.5	123	66.8	89.7	17.57	19.21	41.55	20.01	2.39002e+06	3.40067e+06	2.85032e+06	3.40543e+06	2.90955e+06	2.30357e+06	963482	2.30495e+06	1.57984e+06	2.12253e+06	1.87636e+06	2.74929e+06	Peak Found	Peak Found	Not Found	Peak Found	High	Peak Found	High
FALSE	High	Master Protein	Glyma.08G084300.1.p	PTHR11712:SF226 - 3-OXOACYL-[ACYL-CARRIER-PROTEIN] SYNTHASE I, CHLOROPLASTIC (1 of 2)	0	105.57	32	9	62	1	1	469	49.7	7.49	200	9	0.992	0.887	0.823	1	1	1	107.2	108.1	95.9	88.9	15.86	62.63	17.67	12.45	1.99252e+07	2.01038e+07	1.49794e+07	2.00867e+07	2.44501e+07	4.82359e+06	1.3397e+07	19013462	1.78208e+07	1.38238e+07	1.65266e+07	1.77182e+07	High	High	High	High	High	High	High
FALSE	High	Master Protein	Glyma.05G177000.1.p	PTHR18901//PTHR18901:SF30 - 2-DEOXYGLUCOSE-6-PHOSPHATE PHOSPHATASE 2 // SUBFAMILY NOT NAMED (1 of 2)	0	105.175	30	10	137	0	4	310	34.3	7.62	424.17	10	0.779	1.859	1.228	1	1	1	64	82.2	152.8	100.9	11.15	68.67	20.22	45.19	3.68161e+07	3.69737e+07	4.45075e+07	3.0924e+07	4.74538e+07	1.14185e+08	6.14576e+07	9.06491e+07	8.82308e+07	8.34864e+07	3.13472e+07	5.82597e+07	High	High	High	High	High	High	High
FALSE	High	Master Protein	Glyma.07G088300.1.p	PF00560 - Leucine Rich Repeat (LRR_1) (1 of 458)	0	105.09	24	12	113	4	4	488	53.9	6.46	315.08	12	0.839	1.466	1.371	1	0.383219	0.96798	71.8	85.5	125.4	117.3	25.97	16.22	47.56	19.96	1.40018e+07	1.96254e+07	1.20078e+07	1.6691e+07	1.84217e+07	1.32801e+07	2.44647e+07	2.36094e+07	5.13168e+07	1.79341e+07	2.289e+07	2.69359e+07	High	High	Peak Found	High	High	High	High
FALSE	High	Master Protein	Glyma.13G145200.1.p	K11294 - nucleolin (NCL, NSR1) (1 of 11)	0	105.007	55	11	102	9	9	279	29.9	6.61	323.32	11	0.84	0.458	0.812	1	0.209176	1	108.1	128.6	58.9	104.4	13.28	39.46	33.82	14.37	3.36653e+08	4.23676e+08	4.31851e+08	5.04082e+08	2.8099e+08	6.58756e+08	1.20328e+08	2.31117e+08	2.39983e+08	3.26363e+08	4.09451e+08	4.32931e+08	High	High	High	High	High	High	High
FALSE	High	Master Protein	Glyma.10G223400.1.p	K02925 - large subunit ribosomal protein L3e (RP-L3e, RPL3) (1 of 4)	0	104.884	34	16	82	1	1	389	44.4	10.17	192.35	16	1.714	0.781	0.795	1	1	1	159.8	93.3	72.8	74.1	48.92	1.88	87.2	122	4.74281e+06	2.51272e+06	7.23667e+06	2.84978e+06	2.76695e+06	2.75261e+06	2.15997e+06	1.5453e+06	7.43654e+06	995611	1.28531e+07	2.19915e+06	Not Found	Peak Found	Peak Found	Peak Found	High	Not Found	Not Found
FALSE	High	Master Protein	Glyma.05G056100.1.p	PTHR11709:SF82 - MONOCOPPER OXIDASE-LIKE PROTEIN SKU5 (1 of 5)	0	104.738	22	11	97	1	1	597	67.1	9.06	299.05	11	0.93	1.098	1.905	1	1	0.971765	75.4	81.1	89	154.5	26.82	17.69	49.17	34.2	4.62838e+06	4.2034e+06	6.80944e+06	4.97891e+06	5.99871e+06	4.21339e+06	5.46526e+06	3.01926e+06	8.607e+06	4.84469e+06	9.67782e+06	9.48567e+06	High	High	High	High	High	Peak Found	Peak Found
FALSE	High	Master Protein	Glyma.13G237800.1.p	K02991 - small subunit ribosomal protein S6e (RP-S6e, RPS6) (1 of 8)	0	104.517	35	12	100	0	2	249	28.3	10.71	292.09	12	0.665	0.505	0.739	1	0.603617	1	91.5	137.5	69.4	101.6	56.26	42.43	52.87	30.47	7.16992e+07	8.71336e+07	2.21677e+07	1.07777e+08	7.1979e+07	1.69676e+08	1.66132e+07	54403866	5.66949e+07	7.96101e+07	6.30067e+07	1.14125e+08	High	High	High	High	High	High	High
FALSE	High	Master Protein	Glyma.15G026100.1.p	K03257 - translation initiation factor 4A (EIF4A) (1 of 11)	0	104.499	37	16	110	3	6	413	46.6	5.55	235.54	16	0.986	1.803	6.104	1	0.864504	0.0970868	39.9	40.4	72.9	246.8	7.07	13.76	47.3	53.11	1.40663e+07	1.40462e+07	1.58505e+07	1.58949e+07	1.42688e+07	1.20381e+07	2.57301e+07	1.71688e+07	4.39927e+07	9.05639e+07	2.63454e+07	8.7097e+07	High	High	Peak Found	High	High	Peak Found	Peak Found
FALSE	High	Master Protein	Glyma.09G205500.1.p	KOG0105//KOG0106//KOG0131//KOG0144 - Alternative splicing factor ASF/SF2 (RRM superfamily) // Alternative splicing factor SRp55/B52/SRp75 (RRM superfamily) // Splicing factor 3b, subunit 4 // RNA-binding protein CUGBP1/BRUNO (RRM superfamily) (1 of 1)	0	104.348	48	12	62	5	5	282	30.9	6.27	199.29	12	1.122	1.084	1.381	1	1	0.994378	97.8	87.2	94.5	120.4	34.01	14.5	47.2	66.24	2.49351e+07	2.50556e+07	4.33186e+07	2.08177e+07	2.73227e+07	2.23238e+07	2.09924e+07	24209601	4.77896e+07	3.08361e+07	7.55904e+07	2.26462e+07	High	High	High	High	High	High	High
FALSE	High	Master Protein	Glyma.01G124300.1.p	PTHR11581//PTHR11581:SF11 - 30S/40S RIBOSOMAL PROTEIN S4 // SUBFAMILY NOT NAMED (1 of 2)	0	104.145	42	11	81	0	2	264	30	10.23	213.12	11	1.592	1.117	0.238	1	1	0.178991	161.3	101.3	113.2	24.1	22.85	59.94	52.55	40.22	2.22947e+07	2.55322e+07	3.43924e+07	1.60392e+07	3.33014e+07	1.03937e+07	6.63401e+06	22809719	1.79184e+07	3.82023e+06	6.76406e+06	3.3132e+06	High	High	Not Found	High	High	High	High
FALSE	High	Master Protein	Glyma.08G211700.1.p	PTHR18896:SF11 - PHOSPHOLIPASE D ALPHA 1-RELATED (1 of 7)	0	103.992	25	13	45	2	8	788	89.2	5.8	120.29	13	0.614	0.615	2.097	1	1	1	56.8	92.5	56.9	193.9	23.3	14.51	49.38	58.34	1.28559e+07	1.06247e+07	1.68035e+07	2.09415e+07	2.02894e+07	2.6238e+07	1.28894e+07	9.91505e+06	2.46967e+07	1.1713e+07	4.39192e+07	4.9798e+07	High	High	Peak Found	High	High	Peak Found	High
FALSE	High	Master Protein	Glyma.03G120900.1.p	K03626 - nascent polypeptide-associated complex subunit alpha (EGD2, NACA) (1 of 8)	0	103.885	75	8	93	1	1	198	21.5	4.48	350.69	8																											Not Found	Not Found	Not Found	Not Found	Not Found	Not Found	Not Found
FALSE	High	Master Protein	Glyma.02G173600.1.p	PF04755 - PAP_fibrillin (PAP_fibrillin) (1 of 23)	0	103.675	48	11	93	4	4	299	32.3	5.81	275.49	11	1.119	0.593	0.738	1	1	1	129.8	115.9	68.7	85.6	46.92	17.33	17.66	21.14	7.12337e+07	7.89686e+07	2.74439e+07	6.36475e+07	4.83607e+07	6.82565e+07	4.57086e+07	3.21698e+07	3.77332e+07	3.22106e+07	4.84919e+07	4.69843e+07	High	High	High	High	High	Peak Found	High
FALSE	High	Master Protein	Glyma.07G198500.1.p	K02988 - small subunit ribosomal protein S5 (RP-S5, MRPS5, rpsE) (1 of 4)	0	103.61	29	9	113	2	2	300	32	9.19	348.76	9	0.951	0.695	1.877	1	0.268579	0.235195	84.1	88.4	61.5	166	21.2	29.71	15.23	7.44	3.59653e+07	5.49937e+07	4.41281e+07	4.64105e+07	3.98065e+07	6.91339e+07	2.48335e+07	3.32046e+07	3.22524e+07	8.90137e+07	7.73054e+07	8.71128e+07	High	High	High	High	High	High	High
FALSE	High	Master Protein	Glyma.04G253300.1.p	K02952 - small subunit ribosomal protein S13 (RP-S13, rpsM) (1 of 3)	0	103.499	35	9	162	0	9	162	18.2	10.15	507.76	9	0.98	1.049	1.99	1	1	0.97053	78.1	79.7	83.6	158.6	9.78	51.22	10.01	33.01	3.23234e+08	3.82851e+08	3.26029e+08	3.02361e+08	3.32686e+08	7.16282e+08	3.10386e+08	348869788	3.79585e+08	6.61936e+08	3.96024e+08	7.97236e+08	High	High	High	High	High	High	High
FALSE	High	Master Protein	Glyma.17G247300.2.p	PTHR21569:SF2 - 30S RIBOSOMAL PROTEIN S9, CHLOROPLASTIC (1 of 2)	0	103.487	48	10	92	2	2	207	22.6	10.23	283.64	10	2.112	1.142	0.01	0.66049	1		198.6	94	107.4		9.36	10.96	47.11		2.68594e+07	3.16253e+07	3.18473e+07	1.49772e+07	1.41419e+07	1.74127e+07	1.71094e+07	7.51795e+06	2.184e+07				High	High	Not Found	High	Not Found	Not Found	High
FALSE	High	Master Protein	Glyma.06G030700.1.p	PTHR13061//PTHR13061:SF10 - DYNACTIN SUBUNIT P25 // SUBFAMILY NOT NAMED (1 of 1)	0	103.404	58	12	78	5	5	273	29.6	6.15	221.69	12	0.954	1.021	0.183	1	1	0.00146507	120.9	126.6	129.3	23.2	8.2	17.91	23.71	14.72	1.74676e+07	2.04866e+07	1.84376e+07	1.93171e+07	2.00642e+07	1.41888e+07	1.48813e+07	1.97264e+07	2.41704e+07	3.38002e+06	4.40977e+06	3.53347e+06	High	High	Peak Found	High	High	Peak Found	High
FALSE	High	Master Protein	Glyma.05G014300.1.p	PTHR11071:SF244 - CYCLOPHILIN-LIKE PEPTIDYL-PROLYL CIS-TRANS ISOMERASE FAMILY PROTEIN (1 of 2)	0	103.37	37	12	124	6	6	387	42	5.06	337.13	12	2.248	1.801	5.251	1	1	0.202255	87.3	38.8	69.9	203.9	62.76	73.03	31.15	20.36	2.0034e+07	3.04681e+07	6.67743e+07	9.76676e+06	1.35532e+07	3.6791e+07	1.3586e+07	2.44029e+07	2.55325e+07	5.32519e+07	8.06569e+07	7.11692e+07	High	High	High	High	High	High	High
FALSE	High	Master Protein	Glyma.07G241600.1.p	1.8.1.4 - Dihydrolipoyl dehydrogenase / Lipoyl dehydrogenase (1 of 6)	0	103.34	27	12	78	0	1	629	67.1	8.46	237.64	12	0.97	0.627	0.01	1	0.33721		149.4	154	96.6		13.19	7.97	32		1.18353e+06	1.46837e+06	1.52699e+06	1.586e+06	1.3547e+06	1.5141e+06	627755	949754	1.22497e+06				High	High	Not Found	Peak Found	Peak Found	Not Found	Peak Found
FALSE	High	Master Protein	Glyma.03G212700.1.p	PTHR10025:SF33 - BIFUNCTIONAL PROTEIN FOLD 2 (1 of 2)	0	103.263	54	11	59	4	4	294	31.4	8.22	175.35	11	1.125	0.723	0.124	1	0.601833	0.00039366	151.4	134.6	97.3	16.7	12.06	8.24	16.1	25.81	2.46621e+07	1.94256e+07	2.15119e+07	1.91203e+07	1.96445e+07	1.67793e+07	1.383e+07	1.57478e+07	1.13647e+07	2.37496e+06	3.54607e+06	2.27922e+06	High	High	Not Found	High	High	Not Found	High
FALSE	High	Master Protein	Glyma.13G249900.1.p	PTHR31346:SF3 - DAG PROTEIN-RELATED (1 of 2)	0	102.832	21	4	62	0	4	225	25.5	8.97	221.57	4	0.776	1.166	2.571	1	1	0.158408	56.3	72.6	84.6	186.5	13.99	30.16	39.74	18.87	7.71759e+07	6.17599e+07	6.0467e+07	7.95914e+07	5.74222e+07	1.06259e+08	1.16853e+08	4.92104e+07	9.28345e+07	2.04625e+08	2.17936e+08	1.4997e+08	High	High	High	High	High	High	High
FALSE	High	Master Protein	Glyma.17G122500.1.p	PTHR11071:SF244 - CYCLOPHILIN-LIKE PEPTIDYL-PROLYL CIS-TRANS ISOMERASE FAMILY PROTEIN (1 of 2)	0	102.788	41	12	127	6	6	350	38.2	5.71	341.73	12	0.945	1.156	3.136	1	1	1	60.6	64.1	74.2	201.1	23.15	98	3.05	59.64	2.41493e+07	3.33321e+07	3.88698e+07	3.17205e+07	3.52701e+07	1.64363e+08	4.24488e+07	3.99927e+07	4.0783e+07	1.10601e+08	3.88954e+07	1.62338e+08	High	High	High	High	High	High	High
FALSE	High	Master Protein	Glyma.05G228500.2.p	PTHR10374//PTHR10374:SF12 - LACTOYLGLUTATHIONE LYASE GLYOXALASE I // SUBFAMILY NOT NAMED (1 of 4)	0	102.733	34	11	110	0	2	362	40.1	6.71	279.42	11	0.842	1.328	0.896	1	1	1	82.9	98.4	130.6	88.2	28.69	41.17	30.26	50.72	3.32131e+07	3.10005e+07	5.11101e+07	4.2287e+07	3.94377e+07	1.74227e+07	5.23557e+07	3.4521e+07	6.50105e+07	3.53377e+07	6.1083e+07	2.17468e+07	High	High	High	High	High	High	High
FALSE	High	Master Protein	Glyma.02G255500.1.p	K02941 - large subunit ribosomal protein LP0 (RP-LP0, RPLP0) (1 of 5)	0	102.406	40	9	84	1	2	320	34.1	5.25	290.94	9	0.997	0.927	1.23	1	1	1	96	96.3	89.3	118.4	9.26	10.55	33.73	45.2	2.70739e+07	3.20012e+07	3.1865e+07	3.19738e+07	3.48089e+07	2.81551e+07	1.88763e+07	29642799	3.83841e+07	1.56271e+07	4.24975e+07	3.93258e+07	High	High	High	High	High	Not Found	High
FALSE	High	Master Protein	Glyma.20G224400.1.p	K10046 - GDP-D-mannose 3', 5'-epimerase (GME) (1 of 5)	0	102.382	36	13	101	0	1	376	42.5	6.11	250.66	13	0.881	0.01	0.01	1			187.3	212.7			25.35	1.69			3.32177e+06	5.60692e+06	4.85321e+06	5.60396e+06	5.51139e+06	5.41769e+06							Peak Found	High	Not Found	High	Not Found	Not Found	Not Found
FALSE	High	Master Protein	Glyma.06G223500.1.p	PTHR12601:SF9 - TETRATRICOPEPTIDE REPEAT DOMAIN PROTEIN (1 of 2)	0	102.323	11	13	43	0	6	1859	204	6.25	102.71	13	2.241	0.752	0.96	0.121906	0.492316	1	181	80.8	60.7	77.6	20.91	12.76	10.01	21.34	2.08064e+07	1.38762e+07	2.01312e+07	8.98222e+06	8.89863e+06	1.10717e+07	7.40242e+06	6.75063e+06	6.05406e+06	8.2527e+06	8.62617e+06	1.19806e+07	Not Found	Peak Found	High	High	High	High	High
FALSE	High	Master Protein	Glyma.03G139200.1.p	K01939 - adenylosuccinate synthase (purA, ADSS) (1 of 2)	0	102.114	30	11	61	1	1	486	52.9	7.61	181.9	11	0.928	0.785	0.01	1	0.908664		136.8	147.4	115.8		6.07	15.12	25.01		4.63381e+06	5.17059e+06	5.14388e+06	5.54103e+06	4.63329e+06	6.29049e+06	3.43061e+06	4.35183e+06	5.66121e+06				High	High	Not Found	High	High	Not Found	High
FALSE	High	Master Protein	Glyma.13G202200.1.p	K11159 - carotenoid cleavage dioxygenase (K11159) (1 of 3)	0	102.001	31	13	62	0	13	574	64.5	7.17	183.64	13	1.487	1.07	1.029	0.528513	1	1	129.7	87.2	93.3	89.7	15.83	8.55	6.94	10.41	7.86413e+07	5.86788e+07	7.80822e+07	6.00973e+07	5.24985e+07	5.15736e+07	4.99216e+07	5.61729e+07	5.66799e+07	5.11505e+07	5.39965e+07	6.23329e+07	High	High	High	High	High	Peak Found	High
FALSE	High	Master Protein	Glyma.15G112000.1.p	K14012 - UBX domain-containing protein 1 (SHP1, UBX1, NSFL1C) (1 of 4)	0	101.491	58	15	73	3	3	301	32.9	5.72	194.9	15	0.697	0.419	1.791	1	1	1	71.3	102.4	42.9	183.4	87.28	69.2	89.99	38.93	5.16333e+06	1.10079e+07	3.16386e+07	1.58028e+07	5.50884e+06	2.84049e+07	4.02687e+06	6.62784e+06	2.23023e+07	2.83069e+07	2.17842e+07	4.5862e+07	Peak Found	Peak Found	Peak Found	Not Found	Peak Found	High	High
FALSE	High	Master Protein	Glyma.10G251500.1.p	K03146 - thiamine thiazole synthase (THI4, THI1) (1 of 5)	0	101.48	31	7	67	0	7	351	37.4	6.09	193.75	7	2.075	2.138	1.673	0.33161	0.376091	0.512491	120.5	58.1	124.2	97.2	24.48	19.28	14.94	42.84	1.40968e+08	1.53748e+08	2.19149e+08	9.7037e+07	7.40959e+07	6.78774e+07	1.23292e+08	1.5839e+08	1.64458e+08	1.23935e+08	2.07008e+08	9.01477e+07	High	High	High	High	High	High	High
FALSE	High	Master Protein	Glyma.08G218800.1.p		0	101.201	32	11	81	1	1	471	52.2	5.59	182.43	11	0.751	0.01	1.863	1		0.723635	83.1	110.7		206.2	55.98	22.62		39.14	3.4245e+06	4.15519e+06	9.16424e+06	5.53273e+06	3.61626e+06	5.5345e+06				5.08474e+06	1.18827e+07	1.03096e+07	High	Peak Found	Peak Found	Peak Found	Peak Found	Not Found	Not Found
FALSE	High	Master Protein	Glyma.19G009200.1.p	PTHR36770:SF1 - CALCIUM HOMEOSTASIS REGULATOR-RELATED (1 of 2)	0	101.162	44	9	70	4	9	290	32.4	6.71	205.69	9	1.732	2.271	1.49	1	0.498676	0.762243	106.7	61.6	139.9	91.8	36.64	34.01	44.49	67.95	9.9703e+07	7.28895e+07	1.50597e+08	8.16309e+07	5.75697e+07	4.09981e+07	1.04235e+08	1.30716e+08	2.36332e+08	8.57549e+07	2.34943e+08	7.458e+07	High	High	High	High	High	High	High
FALSE	High	Master Protein	Glyma.14G078100.1.p	PTHR21569:SF2 - 30S RIBOSOMAL PROTEIN S9, CHLOROPLASTIC (1 of 2)	0	101.101	48	10	96	2	2	207	22.5	10.1	279.9	10	1.45	1.074	0.01	1	1		164.6	113.5	121.9		19.07	12.99	33.11		1.89302e+07	2.78531e+07	2.33838e+07	1.61269e+07	1.60037e+07	1.99723e+07	2.37018e+07	1.73223e+07	1.20119e+07				High	High	Not Found	High	High	Not Found	High
FALSE	High	Master Protein	Glyma.12G013100.1.p	PTHR11527:SF95 - 23.5 KDA HEAT SHOCK PROTEIN, MITOCHONDRIAL-RELATED (1 of 2)	0	101.05	46	10	54	1	1	212	23.8	7.58	154.14	10																											Not Found	Not Found	Not Found	Not Found	Not Found	Not Found	Not Found
FALSE	High	Master Protein	Glyma.05G240700.1.p	K00133 - aspartate-semialdehyde dehydrogenase (asd) (1 of 2)	0	100.957	37	10	70	5	5	376	41.1	7.81	226.95	10	1.642	2.135	2.565	0.541881	0.068493	0.0320541	89.4	54.5	116.3	139.7	18.67	19	22.24	17.56	3.27996e+07	2.78183e+07	2.24618e+07	1.69455e+07	2.11313e+07	1.45462e+07	3.6181e+07	2.95924e+07	4.60632e+07	4.34575e+07	4.95625e+07	3.4694e+07	High	High	High	High	High	High	High
FALSE	High	Master Protein	Glyma.10G275100.1.p	K10839 - UV excision repair protein RAD23 (RAD23, HR23) (1 of 8)	0	100.9	33	8	56	2	2	408	42.9	4.84	170	8	100		100				257.7			142.3	15.79			23.15	8.15724e+06	6.47199e+06	6.11257e+06							2.99444e+06	3.57287e+06	4.70426e+06	Not Found	Not Found	High	Not Found	Not Found	Not Found	Not Found
FALSE	High	Master Protein	Glyma.17G021100.1.p		0	100.795	46	11	64	6	6	342	37.2	5.48	221.8	11	1.099	1.3	2.212	1	1	1	78.3	71.3	92.7	157.7	62.24	61.71	51.97	14.13	2.66303e+07	2.32073e+07	6.66865e+07	2.42368e+07	2.37678e+07	6.38501e+07	2.17328e+07	3.15109e+07	5.93179e+07	5.37981e+07	4.1555e+07	5.36057e+07	Peak Found	High	High	High	Peak Found	High	Peak Found
FALSE	High	Master Protein	Glyma.06G164500.1.p	K01191 - alpha-mannosidase (E3.2.1.24) (1 of 7)	0	100.76	17	14	76	1	1	1012	114.4	6.52	179.75	14																											High	Not Found	Not Found	Not Found	High	Not Found	Not Found
FALSE	High	Master Protein	Glyma.11G216200.1.p	PTHR19965:SF33 - THO COMPLEX SUBUNIT 4D (1 of 2)	0	100.696	41	10	78	0	1	298	31.7	11.41	193.19	10	0.01	1.493	2.48		0.988455	0.183427		80.4	120.1	199.4		15.43	55.12	50.24				76963.5	100208	103390	270301	149657	87033.7	248491	217463	516763	Not Found	Not Found	Not Found	Not Found	Not Found	Peak Found	Not Found
FALSE	High	Master Protein	Glyma.18G040400.1.p	PTHR19965:SF33 - THO COMPLEX SUBUNIT 4D (1 of 2)	0	100.312	41	10	77	1	1	298	31.5	11.41	189.47	10			100							400				55.62										89897.3	340499	319570	Not Found	Not Found	Not Found	Not Found	Not Found	Not Found	Not Found
FALSE	High	Master Protein	Glyma.13G285600.1.p	PTHR12903:SF1 - 50S RIBOSOMAL PROTEIN L24, CHLOROPLASTIC (1 of 2)	0	100.183	37	8	133	2	2	194	21.5	9.91	405.39	8	0.84	1.039	1.244	1	1	1	81.5	97	100.8	120.7	11.8	52.43	11.61	38.7	5.35769e+07	6.40351e+07	5.16713e+07	5.59465e+07	6.38088e+07	1.37439e+08	6.63288e+07	67477710	5.43352e+07	7.93717e+07	7.22914e+07	1.40905e+08	High	High	High	High	High	High	High
FALSE	High	Master Protein	Glyma.06G094400.1.p	PTHR18860:SF27 - 14-3-3-LIKE PROTEIN GF14 LAMBDA (1 of 4)	0	100.043	53	13	157	4	4	250	28.3	4.89	350.6	13	0.914	0.794	2.445	1	1	1	71	77.6	61.6	189.8	29.71	10.05	155.75	26.81	2.09301e+07	1.72912e+07	3.04607e+07	1.95971e+07	2.38282e+07	2.2891e+07	1.21361e+07	1.81749e+07	4.20589e+08	3.38241e+07	5.59617e+07	5.71099e+07	High	High	High	High	High	Peak Found	High
FALSE	High	Master Protein	Glyma.20G243700.1.p	6.3.4.3 - Formate--tetrahydrofolate ligase / Tetrahydrofolic formylase (1 of 3)	0	99.997	33	15	70	4	6	636	67.4	6.98	165.13	15	0.928	1.363	0.672	1	1	1	93.7	100.9	137.5	67.8	30.2	20.53	41.56	19.59	3.44682e+07	2.76881e+07	1.83319e+07	2.15181e+07	3.25307e+07	2.98223e+07	5.59618e+07	4.06406e+07	2.28831e+07	1.63403e+07	2.00441e+07	2.42527e+07	High	High	Peak Found	High	High	Peak Found	High
FALSE	High	Master Protein	Glyma.18G035300.1.p	PF00805 - Pentapeptide repeats (8 copies) (Pentapeptide) (1 of 6)	0	99.974	44	7	157	2	3	222	23.3	7.84	548.2	7	1.031	0.796	2.285	1	1	0.868094	80.7	78.3	62.3	178.8	58.51	68.23	58.52	35.06	5.91396e+07	8.49064e+07	1.78764e+08	5.093e+07	8.23765e+07	1.91774e+08	5.60125e+07	65539739	1.53266e+08	1.88211e+08	1.3732e+08	2.76364e+08	High	High	High	High	High	High	High
FALSE	High	Master Protein	Glyma.10G067800.1.p	K02943 - large subunit ribosomal protein LP2 (RP-LP2, RPLP2) (1 of 6)	0	99.76	93	7	85	5	5	114	11.4	4.37	362.91	7	0.678	1.628	2.176	1	1	1	49.5	73	118.8	158.8	112.83	49.62	82.11	32.4	5.14511e+07	6.09635e+07	3.71e+08	6.82931e+07	8.99024e+07	1.71746e+08	8.38846e+07	1.46368e+08	4.1731e+08	1.65098e+08	3.0135e+08	1.95599e+08	High	High	High	High	High	High	High
FALSE	High	Master Protein	Glyma.03G181200.1.p	K01586 - diaminopimelate decarboxylase (lysA) (1 of 3)	0	99.651	28	12	62	0	12	488	54	6.8	166.52	12	1.163	1.162	0.498	1	1	0.0643545	121.7	104.6	121.6	52.1	5.56	23.1	21.23	29.01	6.14016e+07	6.82869e+07	6.31723e+07	5.43282e+07	5.32129e+07	7.85694e+07	5.45394e+07	6.31537e+07	8.21768e+07	2.1091e+07	2.70639e+07	3.74509e+07	High	High	High	High	High	Peak Found	High
FALSE	High	Master Protein	Glyma.20G129400.1.p	1.1.1.95 - Phosphoglycerate dehydrogenase / Phosphoglyceric acid dehydrogenase (1 of 5)	0	99.533	32	12	58	4	4	595	62.8	6.58	154.01	12	1.17	2.141	0.271	1	0.573932	0.610677	102.1	87.3	186.9	23.6	95.41	21.93	74.36	32.85	4.72508e+07	3.8763e+07	2.0085e+08	4.03939e+07	2.6971e+07	4.09645e+07	8.64922e+07	6.803e+07	2.50351e+08	1.76108e+07	1.09341e+07	9.84773e+06	High	High	Peak Found	High	High	Peak Found	Peak Found
FALSE	High	Master Protein	Glyma.06G224200.2.p	PTHR35742:SF1 - THYLAKOID LUMENAL 16.5 KDA PROTEIN, CHLOROPLASTIC (1 of 4)	0	99.499	44	9	189	2	5	229	24.7	8.63	640.45	9	0.93	1.1	3.287	1	1	1	58.9	63.3	69.7	208.1	89.12	94.59	76.57	14.58	9.29699e+07	1.09931e+08	4.23357e+08	1.12477e+08	1.18248e+08	5.31716e+08	8.86104e+07	130106697	3.6478e+08	3.88665e+08	3.26712e+08	4.3865e+08	High	High	High	High	High	High	High
FALSE	High	Master Protein	Glyma.20G233300.1.p	K01875 - seryl-tRNA synthetase (SARS, serS) (1 of 3)	0	99.338	36	14	84	2	2	447	51.4	6.43	181.54	14		100	100						131.9	268.1			9.46	66.53							1.2265e+06	1.15931e+06	1.39079e+06	2.492e+06	2.83547e+06	460426	High	High	Not Found	High	High	Not Found	Not Found
FALSE	High	Master Protein	Glyma.08G262900.1.p	K10839 - UV excision repair protein RAD23 (RAD23, HR23) (1 of 8)	0	99.264	33	9	64	0	2	401	42	4.84	183.71	9	100	100					45.1		354.9		40.25		60.79		456061	433438	848054				1.50306e+06	5.98993e+06	3.58733e+06				Peak Found	Not Found	Not Found	Not Found	Not Found	High	Not Found
FALSE	High	Master Protein	Glyma.19G072000.1.p	PTHR32409:SF3 - MITOCHONDRIAL IMPORT RECEPTOR SUBUNIT TOM20-1-RELATED (1 of 4)	0	99.115	47	8	51	2	2	209	23.2	6.13	175.03	8																											High	High	Not Found	High	High	Not Found	High
FALSE	High	Master Protein	Glyma.11G141500.2.p	K12881 - THO complex subunit 4 (THOC4, ALY) (1 of 5)	0	98.989	48	10	97	6	7	247	26.2	10.1	281.67	10	0.864	0.695	1.33	1	0.756775	1	88.8	102.9	71.5	136.8	22.07	72.81	14.8	42.47	5.3147e+07	3.93685e+07	6.18991e+07	5.10739e+07	6.15354e+07	1.78228e+08	4.27717e+07	4.5203e+07	3.37965e+07	8.18346e+07	4.63652e+07	1.15307e+08	High	High	High	High	High	High	High
FALSE	High	Master Protein	Glyma.05G216700.1.p	PTHR11349:SF53 - NUCLEOSIDE DIPHOSPHATE KINASE-RELATED (1 of 2)	0	98.943	36	8	107	1	8	235	25.2	9.13	367.16	8	1.035	1.153	0.596	1	1	1	109.4	105.7	121.9	63	21.8	38.32	9.37	44.79	2.62318e+08	2.6621e+08	1.75695e+08	2.53441e+08	2.78391e+08	1.22728e+08	2.92146e+08	2.95668e+08	2.48771e+08	1.51104e+08	2.50197e+08	1.02581e+08	High	High	High	High	High	High	High
FALSE	High	Master Protein	Glyma.11G061000.1.p	K11291 - nuclear autoantigenic sperm protein (NASP) (1 of 2)	0	98.915	37	15	81	2	2	475	50.1	4.54	208.11	15	1.145	0.328	1.549	1	0.0418673	0.321143	113.9	99.4	32.6	154.1	11.47	17.81	35.71	31.73	3.84669e+06	4.44381e+06	3.5554e+06	3.35894e+06	2.80624e+06	4.01319e+06	779312	1.60201e+06	1.10113e+06	5.20358e+06	8.62499e+06	5.10968e+06	Not Found	Not Found	High	Not Found	Not Found	High	Not Found
FALSE	High	Master Protein	Glyma.13G177900.1.p	K02988 - small subunit ribosomal protein S5 (RP-S5, MRPS5, rpsE) (1 of 4)	0	98.913	25	8	110	1	1	316	33.9	9.39	351.97	8	1.382	0.754	3.21	1	0.757131	0.469125	87.1	63	47.5	202.3	22.97	61.75	33.2	20.92	3.58014e+07	5.57484e+07	5.45469e+07	3.69441e+07	3.94583e+07	1.01632e+08	1.9745e+07	3.94263e+07	2.97658e+07	1.27846e+08	8.61182e+07	1.26659e+08	High	High	High	High	High	High	High
FALSE	High	Master Protein	Glyma.13G318200.1.p	PTHR21141:SF48 - 60S ACIDIC RIBOSOMAL PROTEIN P2-4 (1 of 2)	0	98.825	59	6	70	2	2	149	15.3	5.05	264.9	6	1.351	1.932	0.95	1	1	1	103.2	76.4	147.7	72.6	110.06	76.22	58.53	90.19	1.17746e+07	1.56639e+07	8.52466e+07	6.00037e+06	1.15981e+07	2.8496e+07	1.12364e+07	2.24092e+07	3.96044e+07	1.09636e+07	4.68204e+07	1.10211e+07	High	High	High	High	High	High	High
FALSE	High	Master Protein	Glyma.02G035000.1.p	PTHR11002:SF15 - CARBONIC ANHYDRASE (1 of 4)	0	98.778	46	10	71	1	6	278	30.2	6.24	245.62	10	1.405	1.576	0.887	1	1	1	115.4	82.2	129.5	72.9	63.72	17.53	62.92	52.33	5.82226e+07	2.90416e+07	1.12735e+08	4.19739e+07	3.02192e+07	4.14536e+07	3.26468e+07	6.53237e+07	1.24797e+08	3.62321e+07	8.3923e+07	3.67823e+07	High	High	High	High	High	Peak Found	High
FALSE	High	Master Protein	Glyma.08G017800.1.p	PTHR22912:SF97 - MONODEHYDROASCORBATE REDUCTASE, CHLOROPLASTIC (1 of 2)	0	98.735	40	14	66	0	14	488	53.3	8.54	198.9	14	0.696	0.503	0.257	0.259221	0.0163847	0.000715529	113.3	162.9	81.9	41.9	7.71	7.51	10.97	21.62	8.26512e+07	8.01571e+07	7.12157e+07	1.08238e+08	1.15215e+08	1.25601e+08	5.00047e+07	6.22755e+07	5.79531e+07	2.963e+07	3.73494e+07	2.42703e+07	High	High	High	High	High	Not Found	High
FALSE	High	Master Protein	Glyma.03G028000.1.p	K01476 - arginase (E3.5.3.1, rocF, arg) (1 of 3)	0	98.632	28	11	105	9	9	350	38.7	6.47	297.42	11	1.201	1.349	1.645	1	0.757226	0.486847	92.5	77	103.8	126.6	35.67	6.02	37.94	12.97	1.17153e+08	1.38219e+08	2.2488e+08	1.10018e+08	1.23847e+08	1.15043e+08	1.35739e+08	1.55157e+08	2.66335e+08	1.89209e+08	2.20696e+08	1.71068e+08	High	High	High	High	High	High	High
FALSE	High	Master Protein	Glyma.11G185500.1.p	K09494 - T-complex protein 1 subunit beta (CCT2) (1 of 2)	0	98.61	39	15	46	0	15	527	57	5.8	101.35	15	1.08	0.404	0.413	1	1	0.884734	149.1	138.1	55.8	57	30.49	51.4	48.79	59.78	8.04654e+08	4.34426e+08	5.89823e+08	6.5762e+08	5.46019e+08	1.97423e+08	2.20756e+08	4.16652e+08	1.68066e+08	3.7791e+08	2.25293e+08	9.86223e+07	High	High	High	High	High	Peak Found	High
FALSE	High	Master Protein	Glyma.18G024600.1.p	K00522 - ferritin heavy chain (FTH1) (1 of 9)	0	98.465	52	11	44	0	4	248	28.1	5.64	153.86	11	1.68	1.398	1.366	1	1	1	123.4	73.5	102.7	100.4	47.03	51.51	50.85	8.64	9.35011e+06	1.99313e+07	2.68057e+07	1.76273e+07	1.18658e+07	5.58527e+06	5.56505e+06	1.79802e+07	1.65919e+07	1.51962e+07	1.80082e+07	1.62136e+07	Peak Found	High	High	High	Peak Found	Peak Found	High
FALSE	High	Master Protein	Glyma.17G072300.1.p	K02520 - translation initiation factor IF-3 (infC, MTIF3) (1 of 5)	0	98.44	32	9	115	0	3	275	30.8	9.11	381.98	9	1.351	1.491	2.874	0.940581	0.559034	0.017741	80.4	59.6	88.8	171.2	15.15	19.48	30.04	6.6	6.22765e+07	8.23743e+07	6.62326e+07	3.99129e+07	4.90394e+07	5.91361e+07	7.31275e+07	5.27088e+07	9.73476e+07	1.42523e+08	1.26184e+08	1.40915e+08	High	High	High	High	High	High	High
FALSE	High	Master Protein	Glyma.20G192200.1.p	1.1.1.82 - Malate dehydrogenase (NADP(+)) / NADP-linked malate dehydrogenase (1 of 2)	0	98.418	29	12	77	2	2	424	46.6	6.79	248.93	12	0.918	0.715	1.309	1	1	1	93.1	101.5	72.5	132.9	16.99	47.45	49.71	41.44	8.12238e+06	8.20985e+06	1.08297e+07	1.26605e+07	8.94663e+06	4.43485e+06	5.21198e+06	6.39529e+06	1.27051e+07	1.30911e+07	1.1714e+07	5.29967e+06	High	High	High	High	High	Peak Found	High
FALSE	High	Master Protein	Glyma.05G037500.1.p	K00099 - 1-deoxy-D-xylulose-5-phosphate reductoisomerase (dxr) (1 of 3)	0	98.374	36	12	108	4	4	475	51.6	6.48	303.67	12	1.143	1.031	0.01	1	1		144	126	129.9		2.7	17.99	31.3		1.31632e+07	1.24726e+07	1.27865e+07	1.11881e+07	8.82359e+06	1.27209e+07	1.36132e+07	7.04162e+06	1.15332e+07				High	High	Peak Found	High	High	Not Found	High
FALSE	High	Master Protein	Glyma.19G124500.1.p	PF02018//PF06964 - Carbohydrate binding domain (CBM_4_9) // Alpha-L-arabinofuranosidase C-terminus (Alpha-L-AF_C) (1 of 1)	0	98.295	23	11	76	3	3	676	74	5.44	231.06	11	1.117	0.977	6.904	1	1	0.0229918	44.7	40	39.1	276.2	46.52	39.25	18.99	40.44	7.59929e+06	8.84224e+06	1.71896e+07	7.34326e+06	7.915e+06	1.43118e+07	7.73233e+06	6.24066e+06	9.17006e+06	8.3592e+07	5.46482e+07	3.68288e+07	High	High	High	High	High	High	High
FALSE	High	Master Protein	Glyma.13G070100.1.p		0	98.031	35	6	119	5	5	185	19.5	4.56	523.68	6	1.012	0.938	4.323	1	1	1	55.7	55	51.6	237.8	122.39	82.81	129.85	10.73	1.32542e+08	1.38465e+08	1.11454e+09	1.3683e+08	1.20509e+08	4.81769e+08	1.20386e+08	128334544	1.24162e+09	5.34813e+08	6.62455e+08	5.9156e+08	High	High	High	High	High	High	High
FALSE	High	Master Protein	Glyma.15G087200.1.p	K06215 - pyridoxal 5'-phosphate synthase pdxS subunit (pdxS, pdx1) (1 of 2)	0	98.028	43	12	147	2	2	311	33.2	6.11	330.67	12	0.79	0.893	0.444	1	1	1	101	127.9	114.2	56.8	70.38	25.89	98.68	120.12	4.00382e+07	3.91422e+07	1.20874e+08	5.06842e+07	4.56333e+07	7.31052e+07	2.10015e+07	4.52595e+07	1.60734e+08	2.25159e+07	1.39807e+08	1.35923e+07	High	High	High	High	High	High	High
FALSE	High	Master Protein	Glyma.19G197500.1.p	PTHR24067//PTHR24067:SF102 - UBIQUITIN-CONJUGATING ENZYME E2 // SUBFAMILY NOT NAMED (1 of 2)	0	97.997	41	8	68	2	7	170	19.5	7.03	199.13	8	0.779	0.847	0.995	1	0.865093	1	86	110.5	93.6	109.9	7.89	38.47	56.93	48.53	3.00944e+07	2.94452e+07	2.59155e+07	3.54173e+07	3.78119e+07	6.78875e+07	8.85034e+06	3.20343e+07	3.55335e+07	8.08511e+07	3.69915e+07	3.76056e+07	High	High	High	High	High	High	High
FALSE	High	Master Protein	Glyma.11G143400.2.p	K02893 - large subunit ribosomal protein L23Ae (RP-L23Ae, RPL23A) (1 of 6)	0	97.989	45	11	142	0	2	151	17.2	10.24	311.9	11	1.256	2.012	4.011	1	1	1	60.7	48.3	97.2	193.8	45.61	107.2	70.63	61.15	8.2789e+07	9.5839e+07	3.43792e+07	4.68511e+07	6.58966e+07	3.2972e+08	1.32582e+08	1.37122e+08	1.77097e+07	2.64313e+08	1.06044e+08	4.33838e+08	High	High	High	High	High	High	High
FALSE	High	Master Protein	Glyma.09G248900.1.p	PTHR23151:SF66 - BIOTIN CARBOXYL CARRIER PROTEIN OF ACETYL-COA CARBOXYLASE 1, CHLOROPLASTIC (1 of 2)	0	97.979	60	11	69	1	4	261	27.5	9.33	196.69	11	0.919	1.799	2.908	1	1	0.61286	55.5	60.4	108.6	175.5	55.27	70.13	20.43	36.51	5.07535e+07	5.10677e+07	1.22491e+08	5.09347e+07	5.55602e+07	1.61811e+08	1.03639e+08	69728281	9.99802e+07	1.61582e+08	1.25177e+08	2.52604e+08	High	High	High	High	High	High	High
FALSE	High	Master Protein	Glyma.20G114700.1.p	K10839 - UV excision repair protein RAD23 (RAD23, HR23) (1 of 8)	0	97.883	30	8	66	0	2	402	42.3	4.89	210.52	8	0.56	0.725	4.191	1	1	0.143876	34.6	61.8	44.8	258.8	4.4	78.3	27.2	24.33	3.96691e+06	3.6961e+06	3.66432e+06	6.60157e+06	2.72904e+06	1.52674e+07	3.40556e+06	4.78823e+06	5.97168e+06	2.07369e+07	3.41173e+07	2.76642e+07	High	High	High	High	Peak Found	High	Not Found
FALSE	High	Master Protein	Glyma.13G334200.1.p	K12881 - THO complex subunit 4 (THOC4, ALY) (1 of 5)	0	97.771	44	8	74	4	5	243	25.9	10.14	189.2	8	0.757	0.781	1.776	1	0.545078	1	70.2	92.7	72.4	164.7	5.44	61.01	35.13	9.53	3.89104e+07	3.90059e+07	4.27454e+07	5.14979e+07	5.09059e+07	1.3472e+08	2.29585e+07	4.02267e+07	4.86419e+07	9.14591e+07	9.76076e+07	8.06778e+07	High	High	High	High	High	High	High
FALSE	High	Master Protein	Glyma.08G272600.1.p	PTHR24089:SF341 - MITOCHONDRIAL CARNITINE/ACYLCARNITINE CARRIER-LIKE PROTEIN (1 of 4)	0	97.745	51	14	107	1	1	297	30.8	9.39	237.17	14	100						400				9.11				3.81023e+06	4.53898e+06	4.01653e+06										Not Found	Not Found	High	Not Found	Not Found	Not Found	Not Found
FALSE	High	Master Protein	Glyma.13G293500.1.p	PTHR32077:SF6 - FASCICLIN-LIKE ARABINOGALACTAN PROTEIN 13-RELATED (1 of 2)	0	97.523	46	10	210	2	2	250	26.6	8.54	552.27	10	0.622	1.021	3.794	1	1	1	38.6	62.1	63.5	235.7	160.79	87.45	148.86	91.06	5.24797e+06	3.90111e+06	1.82212e+08	2.8933e+06	8.44156e+06	2.1573e+07	5.29057e+06	8622926	1.34344e+08	1.29766e+07	9.33235e+07	3.20247e+07	Peak Found	Peak Found	High	Peak Found	High	High	High
FALSE	High	Master Protein	Glyma.01G097100.1.p	PTHR24089:SF341 - MITOCHONDRIAL CARNITINE/ACYLCARNITINE CARRIER-LIKE PROTEIN (1 of 4)	0	97.427	51	14	107	1	1	297	30.7	9.38	237.23	14	100						400				11.87				1.18974e+08	9.62994e+07	9.88206e+07										Not Found	Not Found	High	Not Found	Not Found	Not Found	Not Found
FALSE	High	Master Protein	Glyma.03G235800.3.p	PTHR10381:SF6 - ATP-DEPENDENT CLP PROTEASE PROTEOLYTIC SUBUNIT-RELATED PROTEIN 3, CHLOROPLASTIC (1 of 2)	0	97.265	31	9	61	1	1	324	35.5	8.48	196.08	9			100							400				27.81										4.61356e+06	6.51221e+06	8.1932e+06	Not Found	Not Found	Not Found	Not Found	Not Found	Not Found	Not Found
FALSE	High	Master Protein	Glyma.19G233600.1.p	PTHR10381:SF6 - ATP-DEPENDENT CLP PROTEASE PROTEOLYTIC SUBUNIT-RELATED PROTEIN 3, CHLOROPLASTIC (1 of 2)	0	97.115	31	9	61	0	1	327	36	8.88	195.77	9																											Not Found	Not Found	Not Found	Not Found	Not Found	Not Found	Not Found
FALSE	High	Master Protein	Glyma.13G207000.1.p	PTHR10430:SF7 - PEROXIREDOXIN-2F, MITOCHONDRIAL (1 of 4)	0	97.111	57	10	156	1	1	197	21.2	8.63	453.58	10	0.896	1.018	1.874	1	1	1	74.9	83.6	85	156.6	12.4	55.42	11.87	39.29	3.90205e+07	4.25279e+07	4.96622e+07	3.73262e+07	4.74678e+07	1.01289e+08	4.09298e+07	4.83068e+07	5.18822e+07	9.28183e+07	4.05633e+07	8.89477e+07	High	High	High	High	High	High	High
FALSE	High	Master Protein	Glyma.13G371900.1.p	KOG0651 - 26S proteasome regulatory complex, ATPase RPT4 (1 of 9)	0	97.043	42	13	157	11	11	428	48.9	8.54	363.71	13	0.927	1.038	0.846	1	1	0.910725	97.3	105	108.9	88.8	16.93	9	17.1	9.2	4.38049e+07	4.57582e+07	5.92269e+07	4.97286e+07	4.93608e+07	4.22067e+07	5.123e+07	4.76373e+07	6.53391e+07	3.5542e+07	4.17423e+07	4.20116e+07	High	High	High	High	High	Peak Found	High
FALSE	High	Master Protein	Glyma.08G236400.1.p	PTHR23305:SF12 - GTP-BINDING PROTEIN-RELATED (1 of 1)	0	97.015	45	14	85	2	14	420	46	6.55	250.69	14	0.995	0.884	0.939	1	1	1	104.3	104.8	92.6	98.4	47.66	76.05	43.27	31.94	9.13402e+07	1.00371e+08	2.04635e+08	9.8812e+07	1.0087e+08	3.34305e+08	6.94818e+07	8.91467e+07	1.56071e+08	7.50853e+07	1.39299e+08	9.46841e+07	High	High	High	High	High	High	High
FALSE	High	Master Protein	Glyma.04G122700.2.p	K02873 - large subunit ribosomal protein L13e (RP-L13e, RPL13) (1 of 4)	0	97.008	51	10	130	0	1	207	23.9	10.93	345.1	10	0.218	0.247	0.915	1	1	1	36.7	168	41.5	153.8	33.46	102.6	13.14	39.69	7.47126e+06	1.29103e+07	7.5573e+06	3.46e+07	761914	7.82985e+07	7.95009e+06	8544639	1.02059e+07	5.81077e+07	2.9837e+07	3.16588e+07	High	High	Not Found	High	High	High	High
FALSE	High	Master Protein	Glyma.11G101400.1.p	K00208 - enoyl- (fabI) (1 of 4)	0	96.887	31	9	98	3	3	392	41.3	8.75	247.88	9	1	0.95	0.941	1	1	1	102.8	102.8	97.7	96.7	47.85	34.32	18.15	39.86	3.59262e+07	4.75882e+07	8.80741e+07	4.75755e+07	5.3387e+07	2.58593e+07	4.94968e+07	3.43488e+07	4.5216e+07	2.64683e+07	4.47826e+07	6.18195e+07	High	High	High	High	High	Peak Found	High
FALSE	High	Master Protein	Glyma.11G222100.1.p	PF00805 - Pentapeptide repeats (8 copies) (Pentapeptide) (1 of 6)	0	96.85	39	7	163	0	3	251	26.6	8.41	580.1	7	1.25	1.151	2.3	1	1	0.844804	87.7	70.2	80.7	161.4	61.09	63.11	52.04	32.2	5.66774e+07	9.09688e+07	1.88653e+08	6.60981e+07	7.27552e+07	1.8861e+08	8.3711e+07	6.68406e+07	1.70686e+08	1.67313e+08	1.59378e+08	2.74995e+08	High	High	High	High	High	High	High
FALSE	High	Master Protein	Glyma.09G214400.3.p	K02873 - large subunit ribosomal protein L13e (RP-L13e, RPL13) (1 of 4)	0	96.757	51	10	128	1	1	207	23.8	11.02	337.79	10	0.206	0.148	0.843	1	1	1	37.5	182.1	26.9	153.5	37.12	88.69	32.31	18.39	9.11896e+06	9.16512e+06	4.30178e+06	1.32215e+06	4.43129e+07	6.65984e+07	3.83274e+06	6.54673e+06	7.57595e+06	3.65813e+07	5.01179e+07	3.73477e+07	High	High	Peak Found	High	High	High	High
FALSE	High	Master Protein	Glyma.19G012900.1.p		0	96.694	35	6	120	5	5	184	19.6	4.65	489.14	6	1.063	3.709	3.807	1	1	0.997297	44.4	41.8	154.9	159	111.92	84.87	89.16	11.26	1.19681e+08	1.31772e+08	8.14395e+08	1.20716e+08	1.23977e+08	4.7493e+08	4.59864e+08	1.52309e+08	1.20022e+09	4.60172e+08	5.62664e+08	4.7193e+08	High	High	High	High	High	High	High
FALSE	High	Master Protein	Glyma.17G131100.1.p	PTHR23322:SF3 - PROTEIN SAY1 (1 of 6)	0	96.674	27	12	57	3	3	597	65.5	4.73	163.4	12	0.488	0.01	1.184	0.00662435		0.376392	73.1	149.7		177.2	9.41	6.95		5.81	4.9282e+06	5.00321e+06	5.81929e+06	1.09066e+07	9.48786e+06	1.02427e+07				1.21241e+07	1.24603e+07	1.11296e+07	Not Found	High	Not Found	Not Found	Not Found	High	Not Found
FALSE	High	Master Protein	Glyma.07G019900.1.p	1.1.1.237//1.1.1.81 - Hydroxypyruvate reductase / D-glycerate dehydrogenase (1 of 1)	0	96.478	43	9	64	7	9	313	34.2	6.1	211.86	9	1.05	0.665	0.372	1	0.492991	0.0068882	136.1	129.6	86.1	48.3	1.82	15.08	19.02	19.99	9.12879e+07	8.92416e+07	9.25251e+07	9.08459e+07	8.69439e+07	6.77773e+07	4.76353e+07	6.98278e+07	5.77793e+07	2.27028e+07	3.33675e+07	3.23825e+07	High	High	High	High	High	Peak Found	High
FALSE	High	Master Protein	Glyma.19G243000.1.p	PTHR30345 - RIBOSE-5-PHOSPHATE ISOMERASE B (1 of 1)	0	96.366	54	12	65	12	12	300	32.7	5.52	165.06	12	1.407	1.107	1.98	1	1	0.346993	102.4	72.8	80.6	144.2	38.71	5.35	51.32	29.09	7.21741e+07	7.00926e+07	1.32517e+08	5.12931e+07	5.49488e+07	4.95002e+07	5.01196e+07	5.67821e+07	1.20625e+08	1.01571e+08	1.50288e+08	8.75851e+07	High	High	High	High	High	High	High
FALSE	High	Master Protein	Glyma.17G109400.1.p	1.11.1.7//3.1.3.2//3.1.3.38//3.1.3.41//3.1.3.58//3.1.3.60//3.1.3.9 - Peroxidase / Lactoperoxidase // Acid phosphatase / Phosphomonoesterase // // Sugar-terminal-phosphatase / Xylitol-5-phosphatase // (1 of 1)	0	96.32	26	10	84	0	7	512	59.5	8.1	230.46	10	1.131	0.942	1.444	1	1	0.665462	100.2	88.5	83.4	127.9	19.67	26.95	7.55	5.84	5.1842e+07	4.93621e+07	3.52551e+07	3.8587e+07	4.36255e+07	6.33276e+07	4.04273e+07	46313917	4.11108e+07	5.96801e+07	6.70584e+07	6.29983e+07	High	High	High	High	High	High	High
FALSE	High	Master Protein	Glyma.09G063100.1.p	PTHR22850//PTHR22850:SF105 - WD40 REPEAT FAMILY // SUBFAMILY NOT NAMED (1 of 2)	0	96.307	26	8	55	0	6	513	57.1	6.57	188.74	8	0.421	0.484	1.442	0.149773	0.175914	1	50.3	119.5	57.8	172.4	11.94	44.5	20.64	24.17	1.2369e+07	1.41521e+07	1.57314e+07	3.36066e+07	2.5504e+07	5.91039e+07	1.29676e+07	1.96989e+07	1.62501e+07	4.84726e+07	3.09807e+07	4.94169e+07	High	High	Peak Found	High	High	High	High
FALSE	High	Master Protein	Glyma.05G129900.1.p	PTHR15020 - FLAVIN REDUCTASE-RELATED (1 of 2)	0	96.306	39	8	64	0	8	292	31.7	8.85	188.95	8	0.647	0.796	0.246	1	1	0.0287786	96.2	148.8	118.4	36.6	10.12	13.39	29.63	42.41	6.04383e+07	5.88838e+07	4.98649e+07	9.10624e+07	9.60596e+07	7.38516e+07	1.01053e+08	5.62213e+07	7.2493e+07	2.23813e+07	3.97307e+07	1.8324e+07	High	High	High	High	High	Peak Found	High
FALSE	High	Master Protein	Glyma.08G222100.2.p	K02937 - large subunit ribosomal protein L7e (RP-L7e, RPL7) (1 of 6)	0	96.244	56	14	109	2	2	243	28.3	9.95	293.35	14	1.146	1.172	0.536	1	1	0.89899	118.9	103.8	121.6	55.6	14.5	24.14	10.9	56.09	1.5968e+07	1.33297e+07	1.78694e+07	1.39379e+07	1.68883e+07	1.02854e+07	1.63311e+07	19625049	1.63348e+07	6.1182e+06	1.64528e+07	7.4715e+06	High	High	High	High	High	High	High
FALSE	High	Master Protein	Glyma.08G134400.1.p	PTHR24078:SF315 - MOLECULAR CHAPERONE DNAJ (1 of 4)	0	96.218	27	13	95	0	6	437	47.1	9.07	279.68	13	0.812	1.232	1.289	1	1	1	74.9	92.3	113.7	119	11.14	24.33	17.45	19.62	3.34119e+07	4.03614e+07	3.35162e+07	3.81874e+07	4.1299e+07	5.90079e+07	4.56653e+07	63771323	5.08611e+07	6.62563e+07	4.49169e+07	5.32446e+07	High	High	High	High	High	High	High
FALSE	High	Master Protein	Glyma.14G004200.1.p	PTHR32382:SF4 - FASCICLIN-LIKE ARABINOGALACTAN PROTEIN 1 (1 of 6)	0	96.043	28	9	80	2	2	443	47.9	7.74	260.32	9	2.324	1.816	2.071	0.12785	0.721614	0.193754	128.9	55.5	100.8	114.9	1.93	8.58	35	25.22	3.43183e+07	3.4275e+07	3.54543e+07	1.49936e+07	1.477e+07	1.27833e+07	1.35369e+07	2.77172e+07	2.68264e+07	3.48409e+07	3.05916e+07	2.07241e+07	Not Found	High	High	Not Found	Not Found	High	Not Found
FALSE	High	Master Protein	Glyma.01G162800.1.p	K01681 - aconitate hydratase (ACO, acnA) (1 of 6)	0	96.032	20	14	76	4	4	901	98.5	5.86	181.31	14	0.731	0.55	0.248	1	1	0.446575	115.6	158.2	87	39.3	16.13	19.43	13.35	109.59	1.4073e+08	1.04783e+08	1.40762e+08	1.7253e+08	1.9259e+08	2.49255e+08	8.41102e+07	1.05947e+08	1.08097e+08	4.77958e+07	2.06545e+08	2.05863e+07	High	High	Peak Found	High	High	Not Found	Peak Found
FALSE	High	Master Protein	Glyma.14G022100.1.p	2.3.1.61 - Dihydrolipoyllysine-residue succinyltransferase / Succinyl-CoA:dihydrolipoate S-succinyltransferase (1 of 2)	0	96.01	33	13	118	0	2	464	50.2	9.16	314.57	13	4.942	4.435	10.3	1	0.647404	0.456852	95.6	19.3	85.8	199.3	78.21	31.97	51.14	65.31	2.00651e+06	1.66079e+07	2.35265e+07	2.78054e+06	3.36067e+06	5.08008e+06	3.04011e+07	1.22351e+07	1.49053e+07	6.99267e+06	4.03977e+07	3.46156e+07	Peak Found	Not Found	High	Peak Found	Peak Found	Peak Found	High
FALSE	High	Master Protein	Glyma.20G240400.1.p	PTHR13748//PTHR13748:SF43 - COBW-RELATED // SUBFAMILY NOT NAMED (1 of 2)	0	95.507	32	12	94	1	1	466	52	6.3	292.58	12																											Not Found	Not Found	Not Found	Not Found	Not Found	Not Found	Not Found
FALSE	High	Master Protein	Glyma.12G215900.1.p	PTHR12903:SF1 - 50S RIBOSOMAL PROTEIN L24, CHLOROPLASTIC (1 of 2)	0	95.455	37	8	143	2	2	194	21.4	9.91	387.12	8	0.945	1.174	1.259	1	1	1	86.4	91.4	107.2	115	40.97	44.18	16.5	28.12	4.74784e+07	4.27498e+07	8.6788e+07	4.5325e+07	5.02171e+07	9.65906e+07	6.72302e+07	4.81152e+07	5.89403e+07	6.32159e+07	5.98574e+07	9.71795e+07	High	High	High	High	High	High	High
FALSE	High	Master Protein	Glyma.01G230700.2.p	K13210 - far upstream element-binding protein (FUBP) (1 of 4)	0	95.353	18	11	50	0	1	793	84.2	5.07	153.9	11	0.694	1.33	0.743	1	1	1	73.7	106.2	141.2	78.9	53.09	39.12	16.04	28.96	1.99393e+06	5.75325e+06	7.01727e+06	5.05822e+06	1.15496e+07	8.28511e+06	1.42484e+07	1.08071e+07	1.10171e+07	6.1546e+06	5.60911e+06	9.38705e+06	Not Found	Not Found	High	Not Found	Not Found	High	High
FALSE	High	Master Protein	Glyma.02G154700.1.p	PTHR19424 - HEAT SHOCK FACTOR BINDING PROTEIN 1 (1 of 3)	0	95.309	81	5	109	2	2	88	9.7	4.41	319.25	5	1.371	1.709	1.682	1	0.986766	1	95.2	69.4	118.6	116.8	22.6	23.53	13.36	40.94	3.19406e+07	3.05215e+07	4.5229e+07	2.33037e+07	2.17765e+07	3.30732e+07	3.98206e+07	3.23656e+07	4.20926e+07	2.04896e+07	5.0119e+07	3.9193e+07	High	High	High	High	High	High	High
FALSE	High	Master Protein	Glyma.13G189500.1.p	PTHR11413:SF55 - CYSTEINE PROTEINASE INHIBITOR 6 (1 of 2)	0	95.293	54	9	66	3	3	245	27.7	7.08	176.95	9	1.403	1.383	3.445	1	1	0.71014	77.6	55.3	76.5	190.5	21.21	97.74	14.91	9.42	2.2824e+07	2.14078e+07	3.1282e+07	1.6265e+07	1.42851e+07	7.45761e+07	2.2499e+07	2.22492e+07	2.86911e+07	6.06028e+07	5.01585e+07	5.60264e+07	High	High	High	High	High	High	High
FALSE	High	Master Protein	Glyma.19G194800.1.p	PTHR30314//PTHR30314:SF13 - CELL DIVISION PROTEIN FTSZ-RELATED // SUBFAMILY NOT NAMED (1 of 4)	0	95.235	32	10	57	1	1	478	50.2	7.31	178.21	10																											Not Found	Not Found	Not Found	Not Found	Not Found	Not Found	Not Found
FALSE	High	Master Protein	Glyma.07G020000.1.p	K02937 - large subunit ribosomal protein L7e (RP-L7e, RPL7) (1 of 6)	0	95.175	55	13	110	1	1	243	28.4	9.99	306.85	13	1.068	1.03	0.36	1	1	1	123.6	115.7	119.1	41.7	46.48	58.22	49.61	32.81	2.37101e+07	2.34519e+07	8.61498e+06	2.1954e+07	2.5094e+07	5.92672e+06	2.26029e+07	2.87252e+07	9.16665e+06	6.97926e+06	7.91035e+06	1.25864e+07	High	High	High	High	High	High	High
FALSE	High	Master Protein	Glyma.04G030800.2.p	KOG4042 - Dynactin subunit p27/WS-3, involved in transport of organelles along microtubules (1 of 1)	0	95.155	51	11	76	1	4	276	30	6.71	212.3	11	0.896	0.481	0.451	1	0.908664	0.697666	126.7	141.4	68.1	63.8	26.39	39.08	41.51	11.32	2.74804e+07	3.54078e+07	2.07164e+07	3.33538e+07	3.06757e+07	1.44598e+07	1.47658e+07	2.2688e+07	9.73749e+06	1.27418e+07	1.38319e+07	1.5896e+07	High	High	High	High	High	Peak Found	High
FALSE	High	Master Protein	Glyma.15G217700.1.p	PTHR10891//PTHR10891:SF597 - EF-HAND CALCIUM-BINDING DOMAIN CONTAINING PROTEIN // SUBFAMILY NOT NAMED (1 of 5)	0	95.09	72	9	122	3	3	137	15.2	4.64	322.81	9	0.719	0.317	0.999	1	0.902943	1	94.7	131.8	41.8	131.7	54.53	49.04	77.08	27.26	1.14863e+07	3.72093e+07	4.24173e+07	5.17551e+07	2.87434e+07	8.15907e+07	1.14333e+07	1.64173e+07	4.69173e+07	6.07129e+07	3.44481e+07	5.17074e+07	High	High	High	High	High	High	High
FALSE	High	Master Protein	Glyma.09G010500.1.p		0	94.913	57	7	32	0	5	176	19.1	3.97	108.47	7	3.047	0.654	0.365	0.822578	1	0.896655	240.6	79	51.6	28.8	5.58	7.3	78.79	80.73	1.01601e+08	1.13251e+08	1.05264e+08	3.56337e+07	3.09348e+07	3.45449e+07	2.25916e+07	8.79052e+06	5.14056e+07	8.29094e+06	3.733e+07	1.26066e+07	Not Found	High	High	Not Found	High	High	Not Found
FALSE	High	Master Protein	Glyma.11G233700.6.p	PTHR18866//PTHR18866:SF99 - CARBOXYLASE:PYRUVATE/ACETYL-COA/PROPIONYL-COA CARBOXYLASE // SUBFAMILY NOT NAMED (1 of 4)	0	94.747	48	8	77	0	5	297	32	8.9	260.82	8	0.099	0.331	0.988	0.174604	0.414913	1	16.4	165.4	54.7	163.5	92.21	35.22	36.02	43.35	9.1373e+06	8.6869e+06	3.93446e+07	9.2016e+07	6.69105e+07	1.35172e+08	3.71633e+07	1.71621e+07	3.04202e+07	1.31234e+08	5.20118e+07	9.09241e+07	High	High	High	High	High	High	High
FALSE	High	Master Protein	Glyma.11G102100.1.p	PTHR11777:SF18 - ALANINE--TRNA LIGASE, CYTOPLASMIC (1 of 2)	0	94.699	19	14	60	8	14	999	109.6	5.97	146.3	14	1.36	0.571	0.389	0.811916	0.174628	0.00562903	163.8	120.5	68.8	46.9	8.57	3.12	28.47	5.35	9.82129e+07	1.0109e+08	8.57692e+07	7.27608e+07	7.22228e+07	6.8677e+07	4.12384e+07	6.26661e+07	3.7863e+07	2.81242e+07	2.85559e+07	2.58213e+07	High	High	High	High	High	Peak Found	High
FALSE	High	Master Protein	Glyma.04G156200.1.p	PTHR12601:SF9 - TETRATRICOPEPTIDE REPEAT DOMAIN PROTEIN (1 of 2)	0	94.474	11	13	43	6	6	1855	203.6	6.24	122.4	13	2.03	0.428	0.397	0.435727	0.102253	0.0620481	210.6	103.7	44.4	41.2	19.1	7.11	30.94	33.21	2.29246e+07	2.93632e+07	3.38346e+07	1.44627e+07	1.36606e+07	1.57233e+07	7.98844e+06	4.19828e+06	6.19702e+06	7.44634e+06	3.70999e+06	5.74355e+06	High	Not Found	High	High	High	High	Not Found
FALSE	High	Master Protein	Glyma.13G225000.1.p	K06215 - pyridoxal 5'-phosphate synthase pdxS subunit (pdxS, pdx1) (1 of 2)	0	94.429	43	12	153	2	2	311	33.2	6.33	351.07	12	0.921	0.787	1.436	1	1	1	88.9	96.5	76	138.6	42.61	7.54	84.74	52.53	6.74357e+07	6.28083e+07	1.28704e+08	7.32218e+07	6.98871e+07	8.08718e+07	3.72278e+07	57620644	1.81436e+08	5.20536e+07	1.64728e+08	1.05156e+08	High	High	High	High	High	Peak Found	High
FALSE	High	Master Protein	Glyma.10G139500.1.p	PTHR11071:SF247 - PEPTIDYL-PROLYL CIS-TRANS ISOMERASE D (1 of 3)	0	94.321	23	6	106	0	6	263	29	8.32	323.28	6	0.939	0.798	1.135	1	0.615735	1	97	103.3	82.4	117.3	10.92	9.86	11.51	10.59	2.37856e+08	2.93628e+08	2.8314e+08	2.75181e+08	3.01645e+08	3.35006e+08	2.24533e+08	2.4071e+08	2.8012e+08	3.42483e+08	2.93651e+08	3.62108e+08	High	High	High	High	High	High	High
FALSE	High	Master Protein	Glyma.06G203200.1.p	K02136 - F-type H+-transporting ATPase subunit gamma (ATPeF1G, ATP5C1, ATP3) (1 of 2)	0	94.265	36	11	59	0	5	324	35.4	9.06	182.83	11	0.956	0.573	0.456	1	0.369802	0.124386	128.1	134	76.8	61.1	45.13	18.12	19.18	12.9	1.8464e+07	2.83321e+07	1.09999e+07	2.59707e+07	1.93194e+07	1.91423e+07	9.1018e+06	1.10723e+07	1.33883e+07	8.80666e+06	1.01143e+07	7.82113e+06	High	High	High	High	High	Peak Found	High
FALSE	High	Master Protein	Glyma.16G043500.1.p	K14641 - apyrase (APY1_2) (1 of 6)	0	94.162	25	8	77	0	8	463	50.4	5.14	225.16	8	1.413	1.286	0.73	1	1	1	127.6	90.3	116.1	66	18.45	18.89	17	105.95	1.04626e+08	1.52216e+08	1.35214e+08	9.56698e+07	9.98848e+07	6.91445e+07	9.63321e+07	1.23036e+08	1.35755e+08	6.4388e+07	3.84292e+08	6.98778e+07	High	High	High	High	High	High	High
FALSE	High	Master Protein	Glyma.01G231900.1.p	PTHR21496:SF0 - RIESKE DOMAIN-CONTAINING PROTEIN (1 of 1)	0	94.135	36	11	114	11	11	327	36.3	8.09	309.78	11	0.903	0.957	0.354	1	1	0.93683	112.4	124.4	119.1	44	5.99	53.62	9.98	43.44	3.66855e+08	3.43712e+08	3.25574e+08	4.00605e+08	3.80537e+08	1.13997e+08	3.662e+08	3.05565e+08	3.64303e+08	1.14406e+08	2.47896e+08	1.34623e+08	High	High	High	High	High	High	High
FALSE	High	Master Protein	Glyma.16G004400.1.p	PTHR23151//PTHR23151:SF59 - DIHYDROLIPOAMIDE ACETYL/SUCCINYL-TRANSFERASE-RELATED // SUBFAMILY NOT NAMED (1 of 2)	0	94.126	30	14	99	4	4	547	59.6	7.69	264.19	14	1.355	1.088	1.105	1	1	1	119.1	87.9	95.7	97.2	23.07	30.03	18.37	17.66	1.44752e+07	1.90475e+07	2.31956e+07	1.40622e+07	2.27033e+07	1.38099e+07	1.74102e+07	1.53046e+07	1.19819e+07	1.55441e+07	2.03503e+07	1.48709e+07	High	High	High	High	High	High	High
FALSE	High	Master Protein	Glyma.09G077600.1.p	K02881 - large subunit ribosomal protein L18 (RP-L18, MRPL18, rplR) (1 of 5)	0	94.082	43	8	108	4	4	160	17.8	9.74	319.31	8	1.055	0.884	1.253	1	1	1	100.7	95.4	84.3	119.6	14.75	57.31	9.87	32.88	1.2373e+08	1.64711e+08	1.57816e+08	1.18262e+08	1.49574e+08	3.29773e+08	1.12606e+08	1.35895e+08	1.32223e+08	1.8747e+08	1.32826e+08	2.59506e+08	High	High	High	High	High	High	High
FALSE	High	Master Protein	Glyma.04G029400.1.p	K03064 - 26S proteasome regulatory subunit T4 (PSMC6, RPT4) (1 of 6)	0	93.917	56	16	62	0	15	398	44.6	8.19	136.05	16	1.174	1.423	1.726	1	1	0.914882	88.2	75.1	106.9	129.7	84.12	9.78	28.81	29.48	6.54409e+07	6.35518e+07	2.47178e+08	4.72142e+07	5.66345e+07	5.57491e+07	6.14869e+07	7.93204e+07	1.08976e+08	6.71625e+07	9.62285e+07	1.23537e+08	High	High	High	High	High	Peak Found	High
FALSE	High	Master Protein	Glyma.11G117300.1.p	PF00076 - RNA recognition motif. (a.k.a. RRM, RBD, or RNP domain) (RRM_1) (1 of 477)	0	93.642	54	7	121	3	3	171	16.6	5.63	383.71	7	1.629	3.114	4.72	1	1	0.94364	62.3	38.2	119	180.5	132.49	112.22	111.82	90.34	7.37523e+07	4.35463e+07	6.28611e+08	3.52788e+07	4.52839e+07	2.62181e+08	1.40996e+08	81175448	7.11932e+08	1.56107e+08	7.85453e+08	2.13754e+08	High	High	High	High	High	High	High
FALSE	High	Master Protein	Glyma.17G000700.1.p	PTHR35484:SF2 - OUTER ENVELOPE PORE PROTEIN 37, CHLOROPLASTIC (1 of 1)	0	93.575	49	10	57	10	10	319	36.1	7.5	171.16	10	0.738	0.627	0.443	1	0.93633	0.0831819	105.1	142.5	89.3	63.1	5.22	12.97	40.08	19.4	4.16338e+07	4.56556e+07	4.18989e+07	5.67742e+07	5.70435e+07	4.50185e+07	2.63157e+07	3.56008e+07	5.73659e+07	2.51325e+07	2.70504e+07	1.8367e+07	High	High	High	High	High	Peak Found	High
FALSE	High	Master Protein	Glyma.07G002200.1.p	K03066 - 26S proteasome regulatory subunit T6 (PSMC5, RPT6) (1 of 3)	0	93.355	44	14	63	0	13	418	47.1	8.76	148.56	14	1.02	0.76	0.517	1	1	1	123.7	121.3	92.2	62.7	3.9	62.22	37.19	53.39	1.31848e+08	1.42293e+08	1.35253e+08	1.46501e+08	1.32606e+08	2.93911e+07	7.40596e+07	100764704	1.54154e+08	6.85621e+07	1.09667e+08	3.41706e+07	High	High	High	High	High	Peak Found	High
FALSE	High	Master Protein	Glyma.11G044200.1.p	PTHR11588:SF101 - TUBULIN ALPHA-2 CHAIN-RELATED (1 of 8)	0	93.202	24	10	59	0	1	451	49.7	5.06	161.97	10																											High	Not Found	Not Found	Not Found	Not Found	Not Found	Not Found
FALSE	High	Master Protein	Glyma.04G045000.1.p	PTHR11776:SF8 - ADENINE PHOSPHORIBOSYLTRANSFERASE 1, CHLOROPLASTIC (1 of 3)	0	93.197	49	9	62	0	2	236	25.5	8.07	217.8	9	0.893	0.443	1.984	1	1	1	82.7	92.6	41	183.7	23	8.14	116.34	16.38	5.84279e+06	4.80444e+06	7.56859e+06	7.0123e+06	6.54484e+06	5.95549e+06	2.89674e+06	2.65173e+06	1.97982e+07	1.29818e+07	1.37564e+07	9.963e+06	Peak Found	High	High	High	Peak Found	High	Peak Found
FALSE	High	Master Protein	Glyma.18G026000.1.p	K04646 - clathrin heavy chain (CLTC) (1 of 8)	0	93.139	12	15	52	0	1	1700	192.8	5.53	144.24	15	1.072	0.01	0.01	1			207	193			17.28	20.29			2.08628e+06	1.65952e+06	2.35665e+06	2.51079e+06	1.69869e+06	1.94553e+06							High	Peak Found	Not Found	Peak Found	Peak Found	Not Found	Not Found
FALSE	High	Master Protein	Glyma.09G188600.1.p		0	93.103	19	10	115	1	1	562	61.3	6.81	320.7	10	0.822	0.827	0.829	1	1	1	94.6	115	95.1	95.3	45.7	49.25	114.81	88.77	2.38776e+07	2.36756e+07	4.93404e+07	3.22215e+07	2.90407e+07	1.04315e+07	8.89533e+06	2.40118e+07	1.10824e+08	2.40719e+07	7.86898e+07	1.43973e+07	Peak Found	High	High	High	High	Peak Found	High
FALSE	High	Master Protein	Glyma.12G009400.1.p	PTHR11586:SF18 - NUCLEIC ACID-BINDING, OB-FOLD-LIKE PROTEIN (1 of 2)	0	93.067	39	8	79	2	2	256	28.1	6.68	203.38	8	0.511	0.666	2.324	0.756558	1	0.95843	45.4	88.9	59.2	206.6	12.7	83.15	41.55	16.55	3.04957e+06	3.68423e+06	3.92251e+06	4.59659e+06	7.21324e+06	2.19558e+07	4.6695e+06	4.80247e+06	9.21745e+06	1.27261e+07	1.67656e+07	1.75719e+07	Peak Found	High	Not Found	High	High	High	High
FALSE	High	Master Protein	Glyma.10G042000.1.p	K02693 - photosystem I subunit IV (psaE) (1 of 4)	0	92.859	48	8	315	0	1	172	18.7	9.99	751.43	8	1.358	0.871	1.003	1	1	1	128.3	94.5	82.3	94.8	16.59	25.23	35.43	55.81	1.71559e+08	2.1412e+08	2.401e+08	2.1557e+08	1.57714e+08	1.32599e+08	8.06308e+07	137368808	1.71777e+08	2.27812e+08	1.58116e+08	6.19031e+07	High	High	Not Found	High	High	High	High
FALSE	High	Master Protein	Glyma.13G129400.1.p	K02693 - photosystem I subunit IV (psaE) (1 of 4)	0	92.859	64	8	307	1	1	129	13.8	9.6	697.71	8	1.178	0.585	0.87	1	1	1	129.6	110.1	64.4	95.8	15.99	40.21	84.84	25.41	1.08407e+08	1.27583e+08	9.26152e+07	1.15233e+08	9.20592e+07	4.79041e+07	5.38656e+07	80964296	3.73357e+06	8.0137e+07	9.2246e+07	5.45927e+07	Peak Found	High	Not Found	High	High	High	High
FALSE	High	Master Protein	Glyma.02G199700.1.p	PTHR24067:SF117 - UBIQUITIN-CONJUGATING ENZYME E2 VARIANT 1D (1 of 5)	0	92.827	35	7	75	0	6	190	21.9	9.06	223.85	7	0.874	0.977	1.51	1	1	1	80.2	91.7	89.6	138.5	7.06	45.68	18.43	17.62	6.60552e+07	7.24814e+07	6.32066e+07	6.28943e+07	7.55416e+07	1.42503e+08	5.59831e+07	73801066	8.12069e+07	1.28464e+08	8.98432e+07	1.14098e+08	High	High	Peak Found	High	High	High	High
FALSE	High	Master Protein	Glyma.08G262800.1.p	3.2.1.177 - Alpha-D-xyloside xylohydrolase / Alpha-xylosidase (1 of 3)	0	92.795	17	14	121	1	1	926	102.8	6.64	292.92	14	1.066	0.846	0.01	1	1		146.4	137.4	116.2		12.97	16.42	60.81		2.58026e+06	2.30112e+06	2.97697e+06	2.9308e+06	2.12219e+06	2.42e+06	1.18983e+06	2.04741e+06	4.0765e+06				Peak Found	High	Not Found	Peak Found	Peak Found	Not Found	Peak Found
FALSE	High	Master Protein	Glyma.06G032000.1.p		0	92.758	46	10	84	4	4	230	24.9	7.81	273.08	10	1.056	0.892	0.293	1	1	0.865506	130.3	123.4	110.1	36.2	56.18	56.24	48.25	42.6	2.38687e+08	3.57712e+08	9.79464e+07	2.25939e+08	3.01584e+08	7.82831e+07	4.05373e+08	2.01561e+08	1.75553e+08	6.62826e+07	1.28028e+08	6.32087e+07	High	High	High	High	High	High	High
FALSE	High	Master Protein	Glyma.20G176300.1.p	K00627 - pyruvate dehydrogenase E2 component (dihydrolipoamide acetyltransferase) (DLAT, aceF, pdhC) (1 of 7)	0	92.757	44	12	64	4	4	465	48.4	8.63	188.19	12	1.251	0.612	1.325	1	0.0951506	1	119.5	95.5	58.4	126.6	10.77	31.57	12.42	6.38	1.38825e+07	1.42651e+07	1.16231e+07	9.32645e+06	1.11011e+07	1.68283e+07	7.07329e+06	5.56084e+06	6.78906e+06	1.47141e+07	1.4949e+07	1.32646e+07	High	High	High	High	High	Peak Found	High
FALSE	High	Master Protein	Glyma.04G131800.2.p	K17080 - prohibitin 1 (PHB1) (1 of 3)	0	92.582	54	11	62	3	3	279	30.4	8.35	167.85	11	0.611	0.265	8.065	1	0.907712	1	24.6	40.2	10.7	324.5	104.58	143.44	144.07	58.91	8.26624e+07	1.22201e+08	5.67604e+08	1.99855e+08	1.70861e+08	2.86486e+09	6.22554e+06	52983964	4.57428e+08	2.32766e+09	5.67651e+08	1.61181e+09	High	High	Peak Found	High	High	Peak Found	High
FALSE	High	Master Protein	Glyma.10G162000.1.p	K10046 - GDP-D-mannose 3', 5'-epimerase (GME) (1 of 5)	0	92.426	37	13	93	3	3	376	42.6	6.54	239.55	13	1.774	0.01	0.969	1		0.993419	189.6	106.9		103.5	12.79	14.15		49.45	1.41968e+07	1.34331e+07	1.1037e+07	7.57105e+06	7.28546e+06	9.39356e+06				2.87081e+06	7.33336e+06	8.98565e+06	High	High	High	High	High	Peak Found	High
FALSE	High	Master Protein	Glyma.04G012700.1.p	PF00076 - RNA recognition motif. (a.k.a. RRM, RBD, or RNP domain) (RRM_1) (1 of 477)	0	92.399	54	7	87	6	6	185	18	8.12	277.12	7	1.043	1.677	4.4	1	1	0.4747	51.4	49.3	82.6	216.8	87.42	73.75	53.17	49.85	1.15861e+08	1.23566e+08	4.85564e+08	1.00245e+08	1.18501e+08	3.51771e+08	1.70481e+08	1.98672e+08	4.28121e+08	3.67495e+08	5.21368e+08	9.59435e+08	High	High	High	High	High	High	High
FALSE	High	Master Protein	Glyma.18G033500.1.p	PTHR10795//PTHR10795:SF348 - PROPROTEIN CONVERTASE SUBTILISIN/KEXIN // SUBFAMILY NOT NAMED (1 of 14)	0	92.325	18	9	77	0	1	637	68.1	6.54	265.84	9	0.01	0.01	0.01					400				13.41						2.82736e+06	2.86026e+06	2.23133e+06							High	Not Found	Not Found	High	High	Not Found	Not Found
FALSE	High	Master Protein	Glyma.20G161200.1.p	1.1.1.330 - Very-long-chain 3-oxoacyl-CoA reductase / Very-long-chain beta-ketoacyl-CoA reductase (1 of 30)	0	92.274	34	8	51	5	7	313	34	9.16	167.03	8	0.909	0.566	0.409	1	0.104594	0.0143335	126.1	138.7	78.5	56.8	8.64	13.02	19.64	22.45	2.56647e+07	3.04802e+07	2.77361e+07	2.52682e+07	3.051e+07	3.27539e+07	1.85259e+07	1.72781e+07	1.25291e+07	8.42756e+06	1.31211e+07	1.24905e+07	High	High	High	High	High	Not Found	High
FALSE	High	Master Protein	Glyma.12G183100.5.p	1.1.1.184//1.1.1.72 - Carbonyl reductase (NADPH) / Xenobiotic ketone reductase (1 of 2)	0	92.263	37	11	86	1	1	384	43	7.85	236.74	11	0.311	0.4	2.496	0.202009	0.400613	0.380947	29.6	95.1	38.1	237.3	15.57	37.72	58.74	17.16	5.48109e+06	7.38683e+06	7.15242e+06	2.3013e+07	3.28325e+07	1.50377e+07	9.21616e+06	5.22952e+06	1.74863e+07	5.74362e+07	4.20833e+07	5.79039e+07	High	Not Found	Peak Found	High	Not Found	Not Found	Not Found
FALSE	High	Master Protein	Glyma.12G192200.2.p	K01061 - carboxymethylenebutenolidase (E3.1.1.45) (1 of 3)	0	92.229	62	10	80	0	7	243	26.3	5.62	236.57	10	1.355	1.354	0.915	1	1	1	117.3	86.5	117.1	79.1	64.88	19.48	70.48	87.93	5.53452e+07	6.15415e+07	1.63231e+08	4.47973e+07	6.2239e+07	4.54031e+07	4.34272e+07	61455047	1.58449e+08	4.15413e+07	1.50705e+08	3.23708e+07	High	High	High	High	High	Peak Found	High
FALSE	High	Master Protein	Glyma.03G023900.1.p	PF07386 - Protein of unknown function (DUF1499) (DUF1499) (1 of 5)	0	91.999	33	6	57	0	6	236	26.8	8.84	184.51	6	0.678	0.599	1.729	0.749378	0.606832	0.853134	67.7	99.8	59.8	172.7	15.23	47.28	26.92	16.42	3.45264e+07	4.50095e+07	4.60602e+07	5.07134e+07	6.63761e+07	1.22524e+08	3.56594e+07	3.97507e+07	5.8163e+07	1.14785e+08	9.0759e+07	1.26388e+08	High	High	High	High	High	High	High
FALSE	High	Master Protein	Glyma.15G185000.1.p	K02881 - large subunit ribosomal protein L18 (RP-L18, MRPL18, rplR) (1 of 5)	0	91.994	42	8	92	4	4	162	17.9	9.8	282.63	8	0.988	0.91	1.546	1	1	0.968828	88.9	90	81.9	139.2	20.62	61.24	16.79	37.06	1.19547e+08	1.43396e+08	1.80005e+08	1.13475e+08	1.45178e+08	3.38741e+08	1.51517e+08	1.32087e+08	1.07799e+08	2.24401e+08	2.17674e+08	4.01427e+08	High	High	High	High	High	High	High
FALSE	High	Master Protein	Glyma.01G201000.1.p	K02867 - large subunit ribosomal protein L11 (RP-L11, MRPL11, rplK) (1 of 3)	0	91.991	36	6	135	3	6	215	22.6	9.67	434.48	6	1.124	1.058	1.649	1	1	1	93.1	82.8	87.6	136.6	22.45	44.19	19.44	10.15	3.112e+08	3.78866e+08	4.8571e+08	3.3717e+08	3.31302e+08	6.7764e+08	3.5656e+08	3.52657e+08	4.89029e+08	5.84196e+08	4.78463e+08	5.5604e+08	High	High	High	High	High	High	High
FALSE	High	Master Protein	Glyma.08G141700.1.p	K02934 - large subunit ribosomal protein L6e (RP-L6e, RPL6) (1 of 6)	0	91.858	47	11	79	3	3	232	25.9	10.2	223.65	11	0.892	1.127	1.796	1	1	0.910901	74.1	83.1	93.7	149.2	47.64	63.95	23.65	45.05	7.79052e+06	1.06695e+07	1.93174e+07	1.19679e+07	9.67419e+06	2.96559e+07	1.22601e+07	13492761	1.88755e+07	2.02202e+07	2.14903e+07	4.28143e+07	High	High	Peak Found	High	High	Peak Found	High
FALSE	High	Master Protein	Glyma.12G116300.1.p	PTHR24089:SF340 - ADP,ATP CARRIER PROTEIN 3, MITOCHONDRIAL (1 of 2)	0	91.707	29	12	66	0	2	371	39.7	9.8	165.74	12	0.743	0.01	4.988	1		0.0285259	44.2	59.4		296.4	18.94	25.57		37.35	2.99644e+06	2.55416e+06	3.71327e+06	5.97808e+06	4.03113e+06	3.84686e+06				2.01054e+07	1.28109e+07	2.79685e+07	High	High	Peak Found	High	High	Not Found	Not Found
FALSE	High	Master Protein	Glyma.20G196900.1.p	K04564 - superoxide dismutase, Fe-Mn family (SOD2) (1 of 7)	0	91.652	38	11	75	4	4	248	27.8	5.87	197.54	11	1.524	2.586	0.01	0.587124	0.0868922		119.3	78.3	202.4		22.11	35.52	35.44		1.37161e+07	1.00754e+07	9.12046e+06	6.99009e+06	3.34203e+06	6.61269e+06	1.35314e+07	1.71011e+07	2.6613e+07				High	Not Found	High	High	High	Not Found	High
FALSE	High	Master Protein	Glyma.14G007700.1.p	K09487 - heat shock protein 90kDa beta (HSP90B, TRA1) (1 of 6)	0	91.502	22	15	67	2	8	797	90.4	5.26	159.32	15	1.267	0.68	1.03	1	0.53969	1	127.5	100.6	68.4	103.6	19.63	4.91	16.99	25.36	5.81859e+06	6.30192e+06	4.25263e+06	4.59198e+06	4.91886e+06	4.47819e+06	3.12102e+06	3.82877e+06	2.74716e+06	3.56257e+06	4.7295e+06	5.97443e+06	High	High	High	High	High	Not Found	High
[truncated: 4,030 more rows]
[truncated: 7 more columns]
