# Supplementary material for: Galactolipid and Phospholipid Profile and Proteome Alterations in Soybean Leaves at the Onset of Salt Stress
Source: Frontiers journal article supplement (doi:10.3389/fpls.2021.644408), 2021-03-17
Supplement: Table_4.xls [file Table_4.xls]

## Sheet: identified_prot.0h.enrich
Supplemenmtary Table S4
Protein lists of each KEGG enrichment pathway
##Databases: KEGG PATHWAY
##Statistical test method: hypergeometric test / Fisher's exact test
##FDR correction method: Benjamini and Hochberg
#Term	Database	ID	Input number	Background number	P-Value	Corrected P-Value	Input	Hyperlink
Metabolic pathways	KEGG PATHWAY	gmx01100	526	3553	2.37881e-121	2.71184e-119	Glyma.03G145600.1.p|Glyma.20G212900.1.p|Glyma.08G082900.1.p|Glyma.02G138400.1.p|Glyma.18G195900.1.p|Glyma.14G210700.1.p|Glyma.13G152500.1.p|Glyma.18G244900.1.p|Glyma.10G214200.3.p|Glyma.18G280900.1.p|Glyma.17G066200.3.p|Glyma.06G082400.1.p|Glyma.05G151100.1.p|Glyma.04G193500.1.p|Glyma.12G215100.1.p|Glyma.08G002700.1.p|Glyma.06G270400.1.p|Glyma.03G190500.1.p|Glyma.16G004400.1.p|Glyma.08G334000.1.p…	http://www.genome.jp/kegg-bin/show_pathway?gmx01100/gmx:100810730%09red/gmx:100805941%09red/gmx:100779074%09red/gmx:732571%09red/gmx:100781928%09red/gmx:100800990%09red/gmx:100811326%09red/gmx:100306034%09red/gmx:100790112%09red/gmx:100795575%09red/gmx:100817945%09red/gmx:100801918%09red/gmx:100800699%09red/gmx:100816963%09red/gmx:100814183%09red/gmx:3989355%09red/gmx:100801743%09red/gmx:10080837…
Ribosome	KEGG PATHWAY	gmx03010	171	595	2.03196e-72	1.15822e-70	Glyma.15G185000.1.p|Glyma.04G224000.1.p|Glyma.13G285600.1.p|Glyma.09G255500.1.p|Glyma.15G102600.1.p|Glyma.13G243100.1.p|Glyma.02G085300.1.p|Glyma.08G087200.1.p|Glyma.12G184900.2.p|Glyma.07G114900.2.p|Glyma.01G029200.1.p|Glyma.02G103600.1.p|Glyma.08G141700.1.p|Glyma.03G205800.1.p|Glyma.05G001100.1.p|Glyma.09G138400.1.p|Glyma.11G146300.1.p|Glyma.13G136400.1.p|Glyma.08G151900.1.p|Glyma.08G159800.1.p…	http://www.genome.jp/kegg-bin/show_pathway?gmx03010/gmx:100305682%09red/gmx:100794937%09red/gmx:100786828%09red/gmx:3989263%09red/gmx:100795924%09red/gmx:3989254%09red/gmx:100793713%09red/gmx:100500189%09red/gmx:100811498%09red/gmx:100811654%09red/gmx:100305981%09red/gmx:100801792%09red/gmx:100499742%09red/gmx:100800463%09red/gmx:100500355%09red/gmx:100786189%09red/gmx:100527680%09red/gmx:1007823…
Biosynthesis of secondary metabolites	KEGG PATHWAY	gmx01110	297	2026	4.70314e-65	1.78719e-63	Glyma.03G145600.1.p|Glyma.07G182300.1.p|Glyma.01G173300.1.p|Glyma.10G163700.3.p|Glyma.10G194300.1.p|Glyma.08G064100.1.p|Glyma.02G138400.1.p|Glyma.18G195900.1.p|Glyma.03G181200.1.p|Glyma.10G039000.1.p|Glyma.05G046300.1.p|Glyma.17G128300.1.p|Glyma.19G186000.1.p|Glyma.16G164200.1.p|Glyma.14G003200.1.p|Glyma.18G244900.1.p|Glyma.01G028900.1.p|Glyma.05G000700.2.p|Glyma.08G302600.1.p|Glyma.05G026300.1.p…	http://www.genome.jp/kegg-bin/show_pathway?gmx01110/gmx:100814810%09red/gmx:100819824%09red/gmx:100804126%09red/gmx:547602%09red/gmx:547963%09red/gmx:547550%09red/gmx:100786393%09red/gmx:100792737%09red/gmx:100809241%09red/gmx:100799926%09red/gmx:100803176%09red/gmx:100808361%09red/gmx:100786103%09red/gmx:100790249%09red/gmx:100820392%09red/gmx:100499743%09red/gmx:100814740%09red/gmx:100789900%09…
Carbon metabolism	KEGG PATHWAY	gmx01200	140	488	2.88614e-59	8.22549e-58	Glyma.07G182300.1.p|Glyma.10G039000.1.p|Glyma.10G194300.1.p|Glyma.07G142700.1.p|Glyma.02G138400.1.p|Glyma.18G195900.1.p|Glyma.19G186000.1.p|Glyma.12G210600.1.p|Glyma.20G129400.1.p|Glyma.18G244900.1.p|Glyma.05G000700.2.p|Glyma.11G067800.1.p|Glyma.05G026300.1.p|Glyma.08G020500.1.p|Glyma.19G088400.1.p|Glyma.06G082400.1.p|Glyma.16G028700.1.p|Glyma.07G262100.2.p|Glyma.03G244800.2.p|Glyma.04G193500.1.p…	http://www.genome.jp/kegg-bin/show_pathway?gmx01200/gmx:100819824%09red/gmx:100780041%09red/gmx:100792737%09red/gmx:100809241%09red/gmx:732655%09red/gmx:100802847%09red/gmx:100499743%09red/gmx:732571%09red/gmx:100781928%09red/gmx:100805786%09red/gmx:100789900%09red/gmx:100811326%09red/gmx:547963%09red/gmx:100799358%09red/gmx:100789100%09red/gmx:100798113%09red/gmx:100807451%09red/gmx:100101900%09…
Biosynthesis of amino acids	KEGG PATHWAY	gmx01230	106	429	4.47627e-40	1.02059e-38	Glyma.02G138400.1.p|Glyma.03G181200.1.p|Glyma.19G186000.1.p|Glyma.20G129400.1.p|Glyma.13G144900.1.p|Glyma.05G000700.2.p|Glyma.04G236900.1.p|Glyma.19G088400.1.p|Glyma.06G082400.1.p|Glyma.05G151100.1.p|Glyma.13G131900.1.p|Glyma.03G244800.2.p|Glyma.04G193500.1.p|Glyma.19G114500.2.p|Glyma.08G157700.1.p|Glyma.03G190500.1.p|Glyma.04G008300.1.p|Glyma.06G172600.1.p|Glyma.04G184900.1.p|Glyma.15G072500.1.p…	http://www.genome.jp/kegg-bin/show_pathway?gmx01230/gmx:100819824%09red/gmx:100808361%09red/gmx:100786103%09red/gmx:100820392%09red/gmx:100805786%09red/gmx:100789900%09red/gmx:100811326%09red/gmx:100775828%09red/gmx:100806689%09red/gmx:100799358%09red/gmx:100812202%09red/gmx:100786832%09red/gmx:100101900%09red/gmx:100792394%09red/gmx:100788930%09red/gmx:100808771%09red/gmx:100788585%09red/gmx:100…
Photosynthesis	KEGG PATHWAY	gmx00195	60	120	1.09125e-36	2.07337e-35	Glyma.11G162200.1.p|Glyma.01G238000.1.p|Glyma.01G153500.1.p|Glyma.13G028200.1.p|Glyma.08G126800.1.p|Glyma.13G127200.1.p|Glyma.15G130100.1.p|Glyma.08G304200.1.p|Glyma.08G173700.1.p|Glyma.04G095000.1.p|Glyma.10G249000.1.p|Glyma.02G094900.1.p|Glyma.18G114900.1.p|Glyma.03G114600.1.p|Glyma.10G040600.1.p|Glyma.06G067400.1.p|Glyma.01G180800.1.p|Glyma.12G202500.1.p|Glyma.02G047600.1.p|Glyma.11G077600.1.p…	http://www.genome.jp/kegg-bin/show_pathway?gmx00195/gmx:100101915%09red/gmx:100785563%09red/gmx:100499708%09red/gmx:100781848%09red/gmx:100787080%09red/gmx:3989266%09red/gmx:100814163%09red/gmx:3989327%09red/gmx:3989326%09red/gmx:100306554%09red/gmx:100499729%09red/gmx:100527009%09red/gmx:3989309%09red/gmx:100499745%09red/gmx:100306034%09red/gmx:100802315%09red/gmx:100802032%09red/gmx:3989283%09r…
Carbon fixation in photosynthetic organisms	KEGG PATHWAY	gmx00710	57	129	1.06309e-32	1.73132e-31	Glyma.19G106800.1.p|Glyma.07G182300.1.p|Glyma.10G205500.1.p|Glyma.18G193600.1.p|Glyma.12G061600.1.p|Glyma.14G010900.1.p|Glyma.07G142700.1.p|Glyma.12G037400.1.p|Glyma.17G020600.1.p|Glyma.19G186000.1.p|Glyma.12G210600.1.p|Glyma.02G038100.2.p|Glyma.15G136200.1.p|Glyma.12G159300.1.p|Glyma.17G101700.2.p|Glyma.10G293500.1.p|Glyma.05G026300.1.p|Glyma.01G026700.1.p|Glyma.03G102900.1.p|Glyma.08G165400.1.p…	http://www.genome.jp/kegg-bin/show_pathway?gmx00710/gmx:100819824%09red/gmx:547963%09red/gmx:100806482%09red/gmx:100792666%09red/gmx:547756%09red/gmx:100807126%09red/gmx:100777515%09red/gmx:547755%09red/gmx:100786122%09red/gmx:732571%09red/gmx:547514%09red/gmx:100794277%09red/gmx:100127415%09red/gmx:100799793%09red/gmx:100802480%09red/gmx:100806545%09red/gmx:100782567%09red/gmx:100788090%09red/gm…
Oxidative phosphorylation	KEGG PATHWAY	gmx00190	65	237	3.2054e-27	4.56769e-26	Glyma.13G367000.1.p|Glyma.05G214200.1.p|Glyma.03G180700.1.p|Glyma.07G032800.1.p|Glyma.05G110100.1.p|Glyma.13G162800.1.p|Glyma.14G177100.2.p|Glyma.13G127400.2.p|Glyma.15G231900.1.p|Glyma.11G070800.2.p|Glyma.10G052700.1.p|Glyma.10G267200.1.p|Glyma.11G067800.1.p|Glyma.16G050200.1.p|Glyma.08G209700.1.p|Glyma.09G245700.1.p|Glyma.11G091800.1.p|Glyma.13G362900.2.p|Glyma.09G014000.1.p|Glyma.17G160400.1.p…	http://www.genome.jp/kegg-bin/show_pathway?gmx00190/gmx:100817153%09red/gmx:100306371%09red/gmx:100306258%09red/gmx:100797290%09red/gmx:100775727%09red/gmx:100780778%09red/gmx:100791692%09red/gmx:100815377%09red/gmx:100798544%09red/gmx:100306450%09red/gmx:3989298%09red/gmx:100306106%09red/gmx:100813657%09red/gmx:100814088%09red/gmx:100526984%09red/gmx:100787109%09red/gmx:100777389%09red/gmx:10079…
Glyoxylate and dicarboxylate metabolism	KEGG PATHWAY	gmx00630	49	130	7.75465e-26	9.82256e-25	Glyma.13G210800.2.p|Glyma.11G042200.1.p|Glyma.15G012500.1.p|Glyma.08G175800.1.p|Glyma.05G026300.1.p|Glyma.07G232900.1.p|Glyma.18G244900.1.p|Glyma.02G038100.2.p|Glyma.08G302600.1.p|Glyma.01G026700.1.p|Glyma.12G159300.1.p|Glyma.15G143100.1.p|Glyma.20G019600.1.p|Glyma.09G247900.1.p|Glyma.12G061600.1.p|Glyma.07G262100.2.p|Glyma.16G028700.1.p|Glyma.18G296900.1.p|Glyma.20G107800.1.p|Glyma.14G094700.1.p…	http://www.genome.jp/kegg-bin/show_pathway?gmx00630/gmx:100779623%09red/gmx:547963%09red/gmx:100809241%09red/gmx:100803176%09red/gmx:100802847%09red/gmx:100812952%09red/gmx:100785811%09red/gmx:547511%09red/gmx:100817216%09red/gmx:100781928%09red/gmx:100794277%09red/gmx:100781418%09red/gmx:100127415%09red/gmx:100799793%09red/gmx:100780873%09red/gmx:547953%09red/gmx:100037448%09red/gmx:100806896%09…
Glycolysis / Gluconeogenesis	KEGG PATHWAY	gmx00010	57	253	1.54986e-20	1.76684e-19	Glyma.07G182300.1.p|Glyma.08G165500.1.p|Glyma.01G173300.1.p|Glyma.18G193600.1.p|Glyma.20G114500.2.p|Glyma.14G010900.1.p|Glyma.07G142700.1.p|Glyma.02G026800.1.p|Glyma.15G038100.1.p|Glyma.20G007400.1.p|Glyma.12G037400.1.p|Glyma.02G202500.1.p|Glyma.07G102900.1.p|Glyma.07G232900.1.p|Glyma.05G000700.2.p|Glyma.13G098500.1.p|Glyma.15G178400.1.p|Glyma.10G241000.1.p|Glyma.15G143100.1.p|Glyma.07G126400.1.p…	http://www.genome.jp/kegg-bin/show_pathway?gmx00010/gmx:100800280%09red/gmx:100819824%09red/gmx:100801951%09red/gmx:100782857%09red/gmx:100780041%09red/gmx:100813087%09red/gmx:100778218%09red/gmx:547752%09red/gmx:100803176%09red/gmx:100794084%09red/gmx:100791285%09red/gmx:100499743%09red/gmx:100776238%09red/gmx:547514%09red/gmx:100809452%09red/gmx:100811084%09red/gmx:547791%09red/gmx:100802480%09…
Pyruvate metabolism	KEGG PATHWAY	gmx00620	46	180	1.14498e-18	1.18662e-17	Glyma.10G205500.1.p|Glyma.20G114500.2.p|Glyma.03G102900.1.p|Glyma.02G026800.1.p|Glyma.18G195900.1.p|Glyma.17G020600.1.p|Glyma.12G210600.1.p|Glyma.07G232900.1.p|Glyma.05G000700.2.p|Glyma.12G159300.1.p|Glyma.05G026300.1.p|Glyma.15G178400.1.p|Glyma.15G143100.1.p|Glyma.20G176300.1.p|Glyma.12G161300.1.p|Glyma.02G005500.1.p|Glyma.07G261400.1.p|Glyma.18G243500.1.p|Glyma.06G231500.1.p|Glyma.10G215400.1.p…	http://www.genome.jp/kegg-bin/show_pathway?gmx00620/gmx:100800280%09red/gmx:100810908%09red/gmx:547498%09red/gmx:547963%09red/gmx:100813087%09red/gmx:100778218%09red/gmx:100803176%09red/gmx:100804938%09red/gmx:547756%09red/gmx:100793089%09red/gmx:547755%09red/gmx:100803612%09red/gmx:100799793%09red/gmx:547791%09red/gmx:100806545%09red/gmx:100782567%09red/gmx:100799447%09red/gmx:100800699%09red/gm…
Photosynthesis - antenna proteins	KEGG PATHWAY	gmx00196	23	34	4.24657e-17	4.03424e-16	Glyma.20G212900.1.p|Glyma.08G082900.1.p|Glyma.05G128000.1.p|Glyma.16G165200.1.p|Glyma.03G060300.1.p|Glyma.01G115900.1.p|Glyma.02G064700.1.p|Glyma.11G228800.1.p|Glyma.16G165800.1.p|Glyma.04G167900.1.p|Glyma.08G074000.1.p|Glyma.06G194900.1.p|Glyma.16G205200.1.p|Glyma.12G219300.1.p|Glyma.15G052400.2.p|Glyma.07G047600.1.p|Glyma.18G028400.2.p|Glyma.09G154700.1.p|Glyma.02G305400.1.p|Glyma.08G180000.1.p…	http://www.genome.jp/kegg-bin/show_pathway?gmx00196/gmx:547819%09red/gmx:100820335%09red/gmx:100784089%09red/gmx:100817348%09red/gmx:100779387%09red/gmx:100793702%09red/gmx:100806585%09red/gmx:100802922%09red/gmx:100800350%09red/gmx:100800351%09red/gmx:100783223%09red/gmx:100500118%09red/gmx:100805310%09red/gmx:100785415%09red/gmx:100812066%09red/gmx:100785180%09red/gmx:100798548%09red/gmx:100794…
Citrate cycle (TCA cycle)	KEGG PATHWAY	gmx00020	34	104	7.72601e-17	6.77512e-16	Glyma.10G039000.1.p|Glyma.02G292500.1.p|Glyma.02G026800.1.p|Glyma.17G037900.1.p|Glyma.07G232900.1.p|Glyma.01G028900.1.p|Glyma.11G067800.1.p|Glyma.05G026300.1.p|Glyma.02G042100.1.p|Glyma.20G114500.2.p|Glyma.15G143100.1.p|Glyma.02G094300.1.p|Glyma.02G241200.1.p|Glyma.20G176300.1.p|Glyma.06G231500.1.p|Glyma.14G022100.1.p|Glyma.10G215400.1.p|Glyma.08G157700.1.p|Glyma.09G164900.1.p|Glyma.12G159300.1.p…	http://www.genome.jp/kegg-bin/show_pathway?gmx00020/gmx:100800280%09red/gmx:100527938%09red/gmx:547963%09red/gmx:100813087%09red/gmx:100778218%09red/gmx:100803176%09red/gmx:100813488%09red/gmx:100786103%09red/gmx:100811326%09red/gmx:100812287%09red/gmx:100819151%09red/gmx:100799793%09red/gmx:100790952%09red/gmx:100798407%09red/gmx:100781418%09red/gmx:100777296%09red/gmx:100818379%09red/gmx:100800…
Glycine, serine and threonine metabolism	KEGG PATHWAY	gmx00260	36	123	1.78274e-16	1.45166e-15	Glyma.11G042200.1.p|Glyma.15G012500.1.p|Glyma.20G129400.1.p|Glyma.07G232900.1.p|Glyma.02G038100.2.p|Glyma.08G302600.1.p|Glyma.01G026700.1.p|Glyma.15G178400.1.p|Glyma.05G033500.1.p|Glyma.20G019600.1.p|Glyma.05G151100.1.p|Glyma.12G085900.1.p|Glyma.14G094700.1.p|Glyma.05G240700.1.p|Glyma.10G281400.1.p|Glyma.07G262100.2.p|Glyma.17G012000.1.p|Glyma.20G107800.1.p|Glyma.11G084400.1.p|Glyma.01G199700.1.p…	http://www.genome.jp/kegg-bin/show_pathway?gmx00260/gmx:100779623%09red/gmx:100809241%09red/gmx:100803176%09red/gmx:100794084%09red/gmx:100793061%09red/gmx:100812952%09red/gmx:100785811%09red/gmx:100127415%09red/gmx:548099%09red/gmx:100786630%09red/gmx:100811186%09red/gmx:100812202%09red/gmx:547640%09red/gmx:100499635%09red/gmx:100787173%09red/gmx:100306654%09red/gmx:100778188%09red/gmx:100779355…
Pentose phosphate pathway	KEGG PATHWAY	gmx00030	34	114	7.60041e-16	5.64136e-15	Glyma.07G182300.1.p|Glyma.19G077300.1.p|Glyma.18G193600.1.p|Glyma.14G010900.1.p|Glyma.05G056400.1.p|Glyma.07G142700.1.p|Glyma.20G007400.1.p|Glyma.02G202500.1.p|Glyma.15G136200.1.p|Glyma.17G101700.2.p|Glyma.08G020500.1.p|Glyma.10G293500.1.p|Glyma.19G088400.1.p|Glyma.20G243500.1.p|Glyma.07G126400.1.p|Glyma.04G092400.1.p|Glyma.10G241000.1.p|Glyma.17G075300.1.p|Glyma.03G246300.1.p|Glyma.20G153600.1.p…	http://www.genome.jp/kegg-bin/show_pathway?gmx00030/gmx:100782857%09red/gmx:100780041%09red/gmx:100792737%09red/gmx:100792666%09red/gmx:100811673%09red/gmx:100791285%09red/gmx:100805786%09red/gmx:100789900%09red/gmx:100809452%09red/gmx:100799034%09red/gmx:100798677%09red/gmx:100809411%09red/gmx:100789100%09red/gmx:100799873%09red/gmx:100783936%09red/gmx:100807451%09red/gmx:100775844%09red/gmx:100…
Spliceosome	KEGG PATHWAY	gmx03040	55	311	7.9177e-16	5.64136e-15	Glyma.08G245200.1.p|Glyma.10G123200.1.p|Glyma.13G241800.1.p|Glyma.09G001000.1.p|Glyma.05G117600.1.p|Glyma.11G237500.3.p|Glyma.19G195100.1.p|Glyma.01G227300.1.p|Glyma.15G005900.1.p|Glyma.02G288900.1.p|Glyma.03G143400.1.p|Glyma.12G064000.1.p|Glyma.02G155300.1.p|Glyma.09G090900.1.p|Glyma.13G167800.1.p|Glyma.20G216400.1.p|Glyma.14G188200.1.p|Glyma.20G113200.1.p|Glyma.08G229600.1.p|Glyma.14G136700.1.p…	http://www.genome.jp/kegg-bin/show_pathway?gmx03040/gmx:100816245%09red/gmx:100799718%09red/gmx:100818300%09red/gmx:100811622%09red/gmx:100527187%09red/gmx:100819802%09red/gmx:100812698%09red/gmx:100783362%09red/gmx:100786807%09red/gmx:100778595%09red/gmx:100791039%09red/gmx:100815224%09red/gmx:100797765%09red/gmx:100805822%09red/gmx:100809519%09red/gmx:100817317%09red/gmx:100793209%09red/gmx:100…
Glutathione metabolism	KEGG PATHWAY	gmx00480	37	158	2.69981e-14	1.81046e-13	Glyma.19G077300.1.p|Glyma.06G114400.1.p|Glyma.13G135600.1.p|Glyma.19G077800.1.p|Glyma.08G014300.1.p|Glyma.05G240100.1.p|Glyma.14G177200.1.p|Glyma.04G248300.1.p|Glyma.08G013800.1.p|Glyma.08G020500.1.p|Glyma.19G154100.2.p|Glyma.11G024100.1.p|Glyma.02G204000.1.p|Glyma.12G032300.1.p|Glyma.10G047700.1.p|Glyma.16G155700.1.p|Glyma.05G209200.1.p|Glyma.17G223900.1.p|Glyma.18G021100.1.p|Glyma.19G177200.1.p…	http://www.genome.jp/kegg-bin/show_pathway?gmx00480/gmx:100784258%09red/gmx:100306295%09red/gmx:547597%09red/gmx:100811211%09red/gmx:100793025%09red/gmx:100792735%09red/gmx:100786103%09red/gmx:100775476%09red/gmx:100306570%09red/gmx:100802238%09red/gmx:553156%09red/gmx:100808523%09red/gmx:100819151%09red/gmx:100803548%09red/gmx:100776863%09red/gmx:100799504%09red/gmx:100306136%09red/gmx:100799034…
2-Oxocarboxylic acid metabolism	KEGG PATHWAY	gmx01210	29	94	4.81302e-14	3.04825e-13	Glyma.17G216000.2.p|Glyma.05G240700.1.p|Glyma.11G043300.1.p|Glyma.10G058100.1.p|Glyma.12G122900.1.p|Glyma.13G144900.1.p|Glyma.02G038100.2.p|Glyma.01G026700.1.p|Glyma.20G009400.1.p|Glyma.02G241200.1.p|Glyma.06G082400.1.p|Glyma.13G131900.1.p|Glyma.08G157700.1.p|Glyma.13G291300.1.p|Glyma.11G045300.1.p|Glyma.17G256100.1.p|Glyma.04G073800.1.p|Glyma.05G167700.1.p|Glyma.15G072500.1.p|Glyma.02G042100.1.p…	http://www.genome.jp/kegg-bin/show_pathway?gmx01210/gmx:100786103%09red/gmx:100793061%09red/gmx:100811326%09red/gmx:100127415%09red/gmx:100801527%09red/gmx:100819151%09red/gmx:547792%09red/gmx:100780547%09red/gmx:100798328%09red/gmx:100806689%09red/gmx:100781418%09red/gmx:100814183%09red/gmx:100779210%09red/gmx:100810468%09red/gmx:100783934%09red/gmx:100782688%09red/gmx:100800050%09red/gmx:547509…
RNA transport	KEGG PATHWAY	gmx03013	47	272	2.02866e-13	1.21719e-12	Glyma.02G236700.1.p|Glyma.11G237500.3.p|Glyma.05G003400.1.p|Glyma.01G074700.1.p|Glyma.11G227900.1.p|Glyma.01G227300.1.p|Glyma.08G025600.1.p|Glyma.02G205500.1.p|Glyma.01G029600.1.p|Glyma.08G172000.1.p|Glyma.03G172200.2.p|Glyma.07G060900.1.p|Glyma.20G143300.1.p|Glyma.02G103900.1.p|Glyma.15G026100.1.p|Glyma.18G029500.1.p|Glyma.02G097300.1.p|Glyma.11G141500.2.p|Glyma.18G165200.1.p|Glyma.08G290700.1.p…	http://www.genome.jp/kegg-bin/show_pathway?gmx03013/gmx:100816245%09red/gmx:100783618%09red/gmx:100802805%09red/gmx:100817394%09red/gmx:100527187%09red/gmx:100791863%09red/gmx:100526922%09red/gmx:100783362%09red/gmx:100777906%09red/gmx:100778595%09red/gmx:100777129%09red/gmx:100785429%09red/gmx:100795339%09red/gmx:100789296%09red/gmx:100817317%09red/gmx:100780715%09red/gmx:100775688%09red/gmx:100…
Protein processing in endoplasmic reticulum	KEGG PATHWAY	gmx04141	52	375	1.9764e-11	1.12655e-10	Glyma.05G238500.1.p|Glyma.16G050800.1.p|Glyma.12G045400.1.p|Glyma.11G084700.2.p|Glyma.12G172800.1.p|Glyma.06G114800.1.p|Glyma.18G244100.1.p|Glyma.12G010300.2.p|Glyma.01G068000.1.p|Glyma.04G202900.1.p|Glyma.12G177100.1.p|Glyma.02G014000.3.p|Glyma.20G098400.1.p|Glyma.01G081500.1.p|Glyma.19G183400.1.p|Glyma.02G270000.1.p|Glyma.13G328300.1.p|Glyma.01G159500.1.p|Glyma.12G024500.1.p|Glyma.05G219400.1.p…	http://www.genome.jp/kegg-bin/show_pathway?gmx04141/gmx:100810637%09red/gmx:100785017%09red/gmx:100820543%09red/gmx:100815670%09red/gmx:100776524%09red/gmx:100803843%09red/gmx:100785901%09red/gmx:100814162%09red/gmx:100499727%09red/gmx:100802236%09red/gmx:100790223%09red/gmx:100814141%09red/gmx:100814374%09red/gmx:100779976%09red/gmx:100810595%09red/gmx:100799569%09red/gmx:547558%09red/gmx:100811…
Alanine, aspartate and glutamate metabolism	KEGG PATHWAY	gmx00250	23	95	1.11779e-09	6.06799e-09	Glyma.14G195000.1.p|Glyma.18G043600.1.p|Glyma.17G216000.2.p|Glyma.02G038100.2.p|Glyma.08G302600.1.p|Glyma.01G026700.1.p|Glyma.04G236900.1.p|Glyma.16G218500.1.p|Glyma.06G150000.1.p|Glyma.11G096200.1.p|Glyma.15G045100.1.p|Glyma.04G216000.1.p|Glyma.11G215500.1.p|Glyma.02G228100.1.p|Glyma.06G096700.1.p|Glyma.06G082400.1.p|Glyma.18G116900.1.p|Glyma.13G210800.2.p|Glyma.19G142400.1.p|Glyma.05G046700.1.p…	http://www.genome.jp/kegg-bin/show_pathway?gmx00250/gmx:100815931%09red/gmx:100792329%09red/gmx:100788470%09red/gmx:100127415%09red/gmx:100817195%09red/gmx:547792%09red/gmx:100780873%09red/gmx:547894%09red/gmx:547953%09red/gmx:100808318%09red/gmx:547724%09red/gmx:547509%09red/gmx:100797022%09red/gmx:732565%09red/gmx:100806168%09red/gmx:100787173%09red/gmx:100783047%09red/gmx:100780483%09red/gmx:1…
Fructose and mannose metabolism	KEGG PATHWAY	gmx00051	26	129	2.80248e-09	1.45219e-08	Glyma.07G182300.1.p|Glyma.12G036700.1.p|Glyma.18G193600.1.p|Glyma.14G010900.1.p|Glyma.07G142700.1.p|Glyma.02G250800.1.p|Glyma.20G007400.1.p|Glyma.12G037400.1.p|Glyma.19G186000.1.p|Glyma.02G245800.1.p|Glyma.16G199200.1.p|Glyma.11G169700.1.p|Glyma.07G126400.1.p|Glyma.13G336200.1.p|Glyma.01G167500.1.p|Glyma.03G185800.1.p|Glyma.02G303000.1.p|Glyma.10G194300.1.p|Glyma.04G008300.1.p|Glyma.18G208900.1.p…	http://www.genome.jp/kegg-bin/show_pathway?gmx00051/gmx:100819824%09red/gmx:100782857%09red/gmx:100804624%09red/gmx:100777692%09red/gmx:100820630%09red/gmx:100806500%09red/gmx:100799358%09red/gmx:100798677%09red/gmx:100799873%09red/gmx:100793356%09red/gmx:100807451%09red/gmx:100775844%09red/gmx:100808375%09red/gmx:547761%09red/gmx:100786385%09red/gmx:100792394%09red/gmx:100796274%09red/gmx:100797…
Arginine biosynthesis	KEGG PATHWAY	gmx00220	18	59	3.38294e-09	1.67676e-08	Glyma.20G000500.1.p|Glyma.06G074900.1.p|Glyma.13G131900.1.p|Glyma.05G046700.1.p|Glyma.13G210800.2.p|Glyma.06G096700.1.p|Glyma.17G216000.2.p|Glyma.04G030500.1.p|Glyma.11G043300.1.p|Glyma.03G028000.1.p|Glyma.04G073800.1.p|Glyma.15G102000.2.p|Glyma.02G038100.2.p|Glyma.06G082400.1.p|Glyma.11G215500.1.p|Glyma.01G026700.1.p|Glyma.01G140200.1.p|Glyma.20G009400.1.p	http://www.genome.jp/kegg-bin/show_pathway?gmx00220/gmx:100127415%09red/gmx:100787173%09red/gmx:547792%09red/gmx:100780093%09red/gmx:100783172%09red/gmx:100780483%09red/gmx:100801527%09red/gmx:100814183%09red/gmx:547994%09red/gmx:100775828%09red/gmx:100795886%09red/gmx:547509%09red/gmx:100780873%09red/gmx:100814676%09red/gmx:547953%09red/gmx:100789799%09red/gmx:100809547%09red
Porphyrin and chlorophyll metabolism	KEGG PATHWAY	gmx00860	21	85	4.28987e-09	2.03769e-08	Glyma.02G301700.1.p|Glyma.12G222200.1.p|Glyma.17G100700.1.p|Glyma.10G138600.1.p|Glyma.01G227400.1.p|Glyma.05G026200.1.p|Glyma.03G097900.1.p|Glyma.19G118800.1.p|Glyma.13G232500.1.p|Glyma.05G197600.1.p|Glyma.05G200500.3.p|Glyma.06G002900.1.p|Glyma.04G002900.1.p|Glyma.02G218300.1.p|Glyma.19G123800.1.p|Glyma.04G247700.1.p|Glyma.12G021100.1.p|Glyma.06G221900.3.p|Glyma.04G147700.1.p|Glyma.14G003200.1.p…	http://www.genome.jp/kegg-bin/show_pathway?gmx00860/gmx:100779933%09red/gmx:547795%09red/gmx:100817154%09red/gmx:100779132%09red/gmx:547612%09red/gmx:100784256%09red/gmx:100780934%09red/gmx:100812733%09red/gmx:100810730%09red/gmx:100817017%09red/gmx:548095%09red/gmx:100803481%09red/gmx:100818277%09red/gmx:100815916%09red/gmx:100805393%09red/gmx:100810190%09red/gmx:100790574%09red/gmx:100819951%09…
Ascorbate and aldarate metabolism	KEGG PATHWAY	gmx00053	19	74	1.36106e-08	6.20644e-08	Glyma.10G067500.1.p|Glyma.15G115500.1.p|Glyma.06G114400.1.p|Glyma.08G002700.1.p|Glyma.12G032300.1.p|Glyma.08G064100.1.p|Glyma.06G183900.1.p|Glyma.06G068200.1.p|Glyma.11G209100.1.p|Glyma.02G209000.1.p|Glyma.10G162000.1.p|Glyma.14G177200.1.p|Glyma.16G073100.1.p|Glyma.12G073100.1.p|Glyma.08G243000.1.p|Glyma.04G248300.1.p|Glyma.03G247000.1.p|Glyma.15G178400.1.p|Glyma.U021900.1.p	http://www.genome.jp/kegg-bin/show_pathway?gmx00053/gmx:100811501%09red/gmx:100500084%09red/gmx:100784258%09red/gmx:100816879%09red/gmx:100794772%09red/gmx:100799504%09red/gmx:100817591%09red/gmx:100809400%09red/gmx:100792735%09red/gmx:100170727%09red/gmx:100800699%09red/gmx:606508%09red/gmx:548074%09red/gmx:100802238%09red/gmx:100795192%09red/gmx:100811186%09red/gmx:100780764%09red/gmx:553156%09…
Phagosome	KEGG PATHWAY	gmx04145	28	165	1.94002e-08	8.50625e-08	Glyma.05G214200.1.p|Glyma.03G180700.1.p|Glyma.18G244100.1.p|Glyma.10G052700.1.p|Glyma.14G219300.1.p|Glyma.16G050200.1.p|Glyma.20G098400.1.p|Glyma.09G245700.1.p|Glyma.11G113400.1.p|Glyma.07G023400.1.p|Glyma.08G020300.1.p|Glyma.05G213800.1.p|Glyma.08G006500.1.p|Glyma.05G110200.1.p|Glyma.18G256200.1.p|Glyma.01G109300.1.p|Glyma.08G115100.1.p|Glyma.05G135300.2.p|Glyma.08G081100.1.p|Glyma.01G015600.1.p…	http://www.genome.jp/kegg-bin/show_pathway?gmx04145/gmx:100499803%09red/gmx:100788253%09red/gmx:100798849%09red/gmx:100810595%09red/gmx:100816898%09red/gmx:100775727%09red/gmx:100802236%09red/gmx:100814088%09red/gmx:100800553%09red/gmx:100780187%09red/gmx:100783125%09red/gmx:100811997%09red/gmx:100305531%09red/gmx:100801608%09red/gmx:547851%09red/gmx:100305477%09red/gmx:100776524%09red/gmx:732582…
Proteasome	KEGG PATHWAY	gmx03050	22	105	2.47328e-08	1.04427e-07	Glyma.05G079000.2.p|Glyma.03G073300.2.p|Glyma.05G241500.1.p|Glyma.16G126200.1.p|Glyma.14G014800.5.p|Glyma.16G126300.1.p|Glyma.03G262800.1.p|Glyma.10G295600.1.p|Glyma.14G081600.1.p|Glyma.14G073000.1.p|Glyma.10G151900.1.p|Glyma.04G194700.3.p|Glyma.04G077400.1.p|Glyma.08G167600.1.p|Glyma.18G138900.1.p|Glyma.19G072100.1.p|Glyma.04G029400.1.p|Glyma.08G048800.1.p|Glyma.12G147200.1.p|Glyma.13G031200.2.p…	http://www.genome.jp/kegg-bin/show_pathway?gmx03050/gmx:100799108%09red/gmx:100794489%09red/gmx:100793551%09red/gmx:100788486%09red/gmx:100820387%09red/gmx:100817264%09red/gmx:100778498%09red/gmx:100817941%09red/gmx:100808133%09red/gmx:100306148%09red/gmx:100807110%09red/gmx:100791370%09red/gmx:100499664%09red/gmx:100792921%09red/gmx:100812783%09red/gmx:100803124%09red/gmx:100790425%09red/gmx:100…
Aminoacyl-tRNA biosynthesis	KEGG PATHWAY	gmx00970	25	140	4.58205e-08	1.86555e-07	Glyma.08G311400.1.p|Glyma.03G183400.1.p|Glyma.11G102100.1.p|Glyma.11G065500.1.p|Glyma.10G214200.3.p|Glyma.04G086500.1.p|Glyma.01G006100.1.p|Glyma.03G097900.1.p|Glyma.18G291800.1.p|Glyma.17G026600.1.p|Glyma.16G179800.1.p|Glyma.05G236700.1.p|Glyma.10G155000.1.p|Glyma.01G032500.1.p|Glyma.08G031100.1.p|Glyma.05G059500.1.p|Glyma.08G363700.1.p|Glyma.06G001100.1.p|Glyma.02G234500.1.p|Glyma.03G109000.1.p…	http://www.genome.jp/kegg-bin/show_pathway?gmx00970/gmx:100788164%09red/gmx:100810476%09red/gmx:100810730%09red/gmx:100813162%09red/gmx:100809150%09red/gmx:100776622%09red/gmx:100781232%09red/gmx:100804064%09red/gmx:100801732%09red/gmx:100812652%09red/gmx:100796303%09red/gmx:100812345%09red/gmx:100813016%09red/gmx:100817906%09red/gmx:100793186%09red/gmx:100788013%09red/gmx:100783252%09red/gmx:100…
Nitrogen metabolism	KEGG PATHWAY	gmx00910	17	64	5.11765e-08	2.01177e-07	Glyma.07G212800.2.p|Glyma.14G165000.1.p|Glyma.01G030500.1.p|Glyma.03G128300.2.p|Glyma.02G035000.1.p|Glyma.13G210800.2.p|Glyma.06G109200.1.p|Glyma.14G164900.1.p|Glyma.05G007100.1.p|Glyma.13G084000.1.p|Glyma.02G132100.1.p|Glyma.10G005200.1.p|Glyma.11G215500.1.p|Glyma.15G102000.2.p|Glyma.04G236900.1.p|Glyma.18G138400.1.p|Glyma.19G007700.1.p	http://www.genome.jp/kegg-bin/show_pathway?gmx00910/gmx:100808326%09red/gmx:100781868%09red/gmx:548016%09red/gmx:100810496%09red/gmx:100780873%09red/gmx:100815931%09red/gmx:100818642%09red/gmx:100775519%09red/gmx:100803945%09red/gmx:100305967%09red/gmx:100818103%09red/gmx:100813471%09red/gmx:547953%09red/gmx:732631%09red/gmx:732634%09red
Cysteine and methionine metabolism	KEGG PATHWAY	gmx00270	29	195	1.38487e-07	5.26249e-07	Glyma.02G138400.1.p|Glyma.17G216000.2.p|Glyma.12G159300.1.p|Glyma.05G026300.1.p|Glyma.16G038300.1.p|Glyma.07G206800.1.p|Glyma.06G082400.1.p|Glyma.05G151100.1.p|Glyma.05G240700.1.p|Glyma.03G244800.2.p|Glyma.06G231500.1.p|Glyma.19G114500.2.p|Glyma.08G167100.1.p|Glyma.17G140600.2.p|Glyma.15G190500.1.p|Glyma.02G005500.1.p|Glyma.08G063800.1.p|Glyma.11G045300.1.p|Glyma.08G014300.1.p|Glyma.17G100600.1.p…	http://www.genome.jp/kegg-bin/show_pathway?gmx00270/gmx:100814810%09red/gmx:547963%09red/gmx:100787994%09red/gmx:100793061%09red/gmx:100820392%09red/gmx:100806420%09red/gmx:547792%09red/gmx:100799793%09red/gmx:100798328%09red/gmx:100811211%09red/gmx:100500592%09red/gmx:100796209%09red/gmx:100803035%09red/gmx:100812202%09red/gmx:100101865%09red/gmx:547643%09red/gmx:100101900%09red/gmx:100802039%09…
Lysine biosynthesis	KEGG PATHWAY	gmx00300	9	22	4.19191e-06	1.54154e-05	Glyma.05G151100.1.p|Glyma.08G047800.1.p|Glyma.07G060300.1.p|Glyma.03G181200.1.p|Glyma.08G063500.1.p|Glyma.09G268200.1.p|Glyma.05G240700.1.p|Glyma.03G173400.1.p|Glyma.15G178400.1.p	http://www.genome.jp/kegg-bin/show_pathway?gmx00300/gmx:100814757%09red/gmx:100786832%09red/gmx:100819889%09red/gmx:100793061%09red/gmx:100807796%09red/gmx:100788930%09red/gmx:100807528%09red/gmx:100811186%09red/gmx:100812202%09red
Valine, leucine and isoleucine biosynthesis	KEGG PATHWAY	gmx00290	11	37	4.66931e-06	1.66344e-05	Glyma.11G045300.1.p|Glyma.13G207900.1.p|Glyma.15G005400.1.p|Glyma.17G256100.1.p|Glyma.07G032200.1.p|Glyma.12G122900.1.p|Glyma.05G167700.1.p|Glyma.13G291300.1.p|Glyma.15G072500.1.p|Glyma.11G079000.1.p|Glyma.08G210500.1.p	http://www.genome.jp/kegg-bin/show_pathway?gmx00290/gmx:100779210%09red/gmx:100782688%09red/gmx:100780547%09red/gmx:100783934%09red/gmx:100798328%09red/gmx:100806689%09red/gmx:100809737%09red/gmx:100812763%09red/gmx:100789879%09red/gmx:100807689%09red/gmx:100810468%09red
Peroxisome	KEGG PATHWAY	gmx04146	22	150	5.21005e-06	1.79984e-05	Glyma.19G240400.1.p|Glyma.08G175800.1.p|Glyma.16G153900.1.p|Glyma.08G302600.1.p|Glyma.03G242900.2.p|Glyma.02G241200.1.p|Glyma.06G144500.1.p|Glyma.20G143900.1.p|Glyma.11G035200.1.p|Glyma.01G225200.1.p|Glyma.15G250800.1.p|Glyma.06G289700.1.p|Glyma.20G050800.1.p|Glyma.17G141800.1.p|Glyma.05G005300.1.p|Glyma.06G017900.1.p|Glyma.04G017500.1.p|Glyma.17G009400.1.p|Glyma.18G116900.1.p|Glyma.11G192700.1.p…	http://www.genome.jp/kegg-bin/show_pathway?gmx04146/gmx:100499991%09red/gmx:100814965%09red/gmx:100786103%09red/gmx:547511%09red/gmx:100780008%09red/gmx:100819151%09red/gmx:100170726%09red/gmx:100500051%09red/gmx:100305732%09red/gmx:100037448%09red/gmx:100778673%09red/gmx:100527058%09red/gmx:547625%09red/gmx:100777153%09red/gmx:732565%09red/gmx:100815376%09red/gmx:100786361%09red/gmx:100801389%09…
Fatty acid biosynthesis	KEGG PATHWAY	gmx00061	15	79	1.13237e-05	3.79676e-05	Glyma.05G221100.1.p|Glyma.11G101400.1.p|Glyma.18G195900.1.p|Glyma.08G349200.1.p|Glyma.18G057700.1.p|Glyma.20G143900.1.p|Glyma.07G207200.1.p|Glyma.18G243500.1.p|Glyma.01G225200.1.p|Glyma.15G052500.1.p|Glyma.12G027300.1.p|Glyma.09G248900.1.p|Glyma.05G129600.1.p|Glyma.08G084300.1.p|Glyma.11G248000.1.p	http://www.genome.jp/kegg-bin/show_pathway?gmx00061/gmx:547575%09red/gmx:100217331%09red/gmx:547498%09red/gmx:100817945%09red/gmx:100814965%09red/gmx:100806814%09red/gmx:548072%09red/gmx:100301904%09red/gmx:100785606%09red/gmx:732644%09red/gmx:100777266%09red/gmx:100037462%09red/gmx:100795986%09red/gmx:100778244%09red/gmx:548028%09red
C5-Branched dibasic acid metabolism	KEGG PATHWAY	gmx00660	7	13	1.26647e-05	4.12507e-05	Glyma.05G167700.1.p|Glyma.11G079000.1.p|Glyma.15G005400.1.p|Glyma.17G256100.1.p|Glyma.07G032200.1.p|Glyma.15G072500.1.p|Glyma.08G210500.1.p	http://www.genome.jp/kegg-bin/show_pathway?gmx00660/gmx:100779210%09red/gmx:100782688%09red/gmx:100780547%09red/gmx:100783934%09red/gmx:100809737%09red/gmx:100807689%09red/gmx:100810468%09red
Sulfur metabolism	KEGG PATHWAY	gmx00920	13	63	1.99682e-05	6.32328e-05	Glyma.12G019400.1.p|Glyma.07G206800.1.p|Glyma.13G261400.1.p|Glyma.15G108700.1.p|Glyma.09G004400.1.p|Glyma.03G244800.2.p|Glyma.02G138400.1.p|Glyma.08G167100.1.p|Glyma.09G258000.1.p|Glyma.10G242600.1.p|Glyma.13G051000.1.p|Glyma.09G246700.1.p|Glyma.08G086800.1.p	http://www.genome.jp/kegg-bin/show_pathway?gmx00920/gmx:100101865%09red/gmx:100806420%09red/gmx:100805275%09red/gmx:100798053%09red/gmx:100817415%09red/gmx:100780846%09red/gmx:100101900%09red/gmx:100799978%09red/gmx:100815330%09red/gmx:547630%09red/gmx:547634%09red/gmx:100817799%09red/gmx:100790764%09red
One carbon pool by folate	KEGG PATHWAY	gmx00670	10	36	2.07464e-05	6.39214e-05	Glyma.06G325300.1.p|Glyma.18G150000.1.p|Glyma.17G012000.1.p|Glyma.16G164900.5.p|Glyma.08G108900.2.p|Glyma.13G222300.1.p|Glyma.07G262100.2.p|Glyma.08G274400.1.p|Glyma.20G243700.1.p|Glyma.14G184500.1.p	http://www.genome.jp/kegg-bin/show_pathway?gmx00670/gmx:100797489%09red/gmx:100499635%09red/gmx:100778188%09red/gmx:100305381%09red/gmx:100305380%09red/gmx:100812952%09red/gmx:100809241%09red/gmx:100797707%09red/gmx:100806844%09red
Monobactam biosynthesis	KEGG PATHWAY	gmx00261	7	15	2.58295e-05	7.74885e-05	Glyma.05G151100.1.p|Glyma.08G047800.1.p|Glyma.05G240700.1.p|Glyma.09G268200.1.p|Glyma.07G060300.1.p|Glyma.10G242600.1.p|Glyma.13G051000.1.p	http://www.genome.jp/kegg-bin/show_pathway?gmx00261/gmx:100814757%09red/gmx:100805275%09red/gmx:100819889%09red/gmx:100793061%09red/gmx:547634%09red/gmx:100788930%09red/gmx:100812202%09red
Propanoate metabolism	KEGG PATHWAY	gmx00640	12	56	2.98961e-05	8.73886e-05	Glyma.05G221100.1.p|Glyma.13G125400.1.p|Glyma.18G195900.1.p|Glyma.17G037900.1.p|Glyma.10G039000.1.p|Glyma.17G140600.2.p|Glyma.18G243500.1.p|Glyma.16G213200.1.p|Glyma.07G232900.1.p|Glyma.09G248900.1.p|Glyma.09G164900.1.p|Glyma.15G143100.1.p	http://www.genome.jp/kegg-bin/show_pathway?gmx00640/gmx:100527938%09red/gmx:100782001%09red/gmx:547498%09red/gmx:547523%09red/gmx:100788043%09red/gmx:548072%09red/gmx:100803176%09red/gmx:100790952%09red/gmx:100803035%09red/gmx:100815484%09red/gmx:100037462%09red/gmx:100778244%09red
Amino sugar and nucleotide sugar metabolism	KEGG PATHWAY	gmx00520	28	266	8.09551e-05	0.000230722	Glyma.02G304500.2.p|Glyma.19G124500.1.p|Glyma.02G250800.1.p|Glyma.14G210700.1.p|Glyma.13G152500.1.p|Glyma.12G084100.1.p|Glyma.10G241000.1.p|Glyma.02G245800.1.p|Glyma.18G286200.1.p|Glyma.12G180300.1.p|Glyma.10G162000.1.p|Glyma.01G063000.1.p|Glyma.04G092400.1.p|Glyma.17G132500.1.p|Glyma.05G008100.1.p|Glyma.02G120900.1.p|Glyma.20G153600.1.p|Glyma.01G167500.1.p|Glyma.03G120000.3.p|Glyma.18G208900.1.p…	http://www.genome.jp/kegg-bin/show_pathway?gmx00520/gmx:102667779%09red/gmx:100814818%09red/gmx:100775641%09red/gmx:100791285%09red/gmx:100777692%09red/gmx:100794066%09red/gmx:100809452%09red/gmx:100809983%09red/gmx:100790112%09red/gmx:100781191%09red/gmx:100781643%09red/gmx:100793356%09red/gmx:100788017%09red/gmx:100808375%09red/gmx:100816315%09red/gmx:100819222%09red/gmx:100786385%09red/gmx:100…
mRNA surveillance pathway	KEGG PATHWAY	gmx03015	24	216	0.00012023	0.000334297	Glyma.10G191400.1.p|Glyma.11G237500.3.p|Glyma.02G068500.2.p|Glyma.01G227300.1.p|Glyma.08G172000.1.p|Glyma.18G077300.4.p|Glyma.02G103900.1.p|Glyma.10G189500.1.p|Glyma.11G141500.2.p|Glyma.20G201300.2.p|Glyma.15G158800.1.p|Glyma.08G128300.1.p|Glyma.13G334200.1.p|Glyma.11G015500.1.p|Glyma.05G243400.1.p|Glyma.14G016600.2.p|Glyma.18G019700.1.p|Glyma.18G081700.1.p|Glyma.20G198900.2.p|Glyma.07G215300.3.p…	http://www.genome.jp/kegg-bin/show_pathway?gmx03015/gmx:100788515%09red/gmx:100816245%09red/gmx:100527187%09red/gmx:100526922%09red/gmx:100783362%09red/gmx:100778595%09red/gmx:100527139%09red/gmx:100817317%09red/gmx:100811385%09red/gmx:100780329%09red/gmx:100786788%09red/gmx:100811267%09red/gmx:100794390%09red/gmx:100813792%09red/gmx:100811056%09red/gmx:100527545%09red/gmx:100786288%09red/gmx:100…
Butanoate metabolism	KEGG PATHWAY	gmx00650	9	37	0.000128014	0.000347466	Glyma.16G218500.1.p|Glyma.18G043600.1.p|Glyma.13G349100.1.p|Glyma.16G028700.1.p|Glyma.11G096200.1.p|Glyma.05G167700.1.p|Glyma.07G059800.1.p|Glyma.15G072500.1.p|Glyma.15G263500.1.p	http://www.genome.jp/kegg-bin/show_pathway?gmx00650/gmx:100779210%09red/gmx:547724%09red/gmx:100783047%09red/gmx:100783934%09red/gmx:100808318%09red/gmx:100815181%09red/gmx:100802847%09red/gmx:100817216%09red/gmx:100781928%09red
Arachidonic acid metabolism	KEGG PATHWAY	gmx00590	8	30	0.000176788	0.000468693	Glyma.17G223900.1.p|Glyma.19G154100.2.p|Glyma.11G024100.1.p|Glyma.08G013900.1.p|Glyma.08G047200.1.p|Glyma.05G240100.1.p|Glyma.08G013800.1.p|Glyma.18G021100.1.p	http://www.genome.jp/kegg-bin/show_pathway?gmx00590/gmx:100808523%09red/gmx:100527297%09red/gmx:100306295%09red/gmx:100797040%09red/gmx:100306136%09red/gmx:100305775%09red/gmx:100306570%09red/gmx:100306590%09red
Phenylalanine, tyrosine and tryptophan biosynthesis	KEGG PATHWAY	gmx00400	12	71	0.000219649	0.000558646	Glyma.05G181000.1.p|Glyma.20G179500.1.p|Glyma.19G160800.1.p|Glyma.06G082400.1.p|Glyma.01G082200.1.p|Glyma.17G216000.2.p|Glyma.08G312300.1.p|Glyma.02G073000.1.p|Glyma.04G184900.1.p|Glyma.20G103200.1.p|Glyma.17G222700.1.p|Glyma.15G054700.1.p	http://www.genome.jp/kegg-bin/show_pathway?gmx00400/gmx:732610%09red/gmx:547792%09red/gmx:100783691%09red/gmx:100814518%09red/gmx:100811217%09red/gmx:100801361%09red/gmx:100808361%09red/gmx:100792812%09red/gmx:547509%09red/gmx:100794615%09red/gmx:100789764%09red/gmx:100526928%09red
Purine metabolism	KEGG PATHWAY	gmx00230	28	284	0.000220518	0.000558646	Glyma.05G066500.1.p|Glyma.10G163700.3.p|Glyma.04G045000.1.p|Glyma.10G125100.1.p|Glyma.09G096800.1.p|Glyma.10G184900.1.p|Glyma.05G000700.2.p|Glyma.10G241000.1.p|Glyma.03G088500.1.p|Glyma.09G234300.1.p|Glyma.17G127400.1.p|Glyma.17G128300.1.p|Glyma.16G036100.1.p|Glyma.13G051000.1.p|Glyma.11G221100.1.p|Glyma.20G153600.1.p|Glyma.16G043400.1.p|Glyma.20G024800.1.p|Glyma.05G046300.1.p|Glyma.16G043500.1.p…	http://www.genome.jp/kegg-bin/show_pathway?gmx00230/gmx:100811753%09red/gmx:100777103%09red/gmx:100792329%09red/gmx:100819741%09red/gmx:100787182%09red/gmx:100782385%09red/gmx:547634%09red/gmx:100797579%09red/gmx:100499661%09red/gmx:100784319%09red/gmx:100780391%09red/gmx:547791%09red/gmx:100801737%09red/gmx:100818830%09red/gmx:100787491%09red/gmx:547870%09red/gmx:100305792%09red/gmx:100805275%09…
Vitamin B6 metabolism	KEGG PATHWAY	gmx00750	7	25	0.000349588	0.000866371	Glyma.06G133700.1.p|Glyma.11G084400.1.p|Glyma.13G225000.1.p|Glyma.03G060100.1.p|Glyma.17G052000.1.p|Glyma.04G093600.1.p|Glyma.15G087200.1.p	http://www.genome.jp/kegg-bin/show_pathway?gmx00750/gmx:732627%09red/gmx:100816306%09red/gmx:100795497%09red/gmx:100779355%09red/gmx:100776337%09red/gmx:100791681%09red/gmx:100788585%09red
Fatty acid metabolism	KEGG PATHWAY	gmx01212	16	124	0.000357266	0.00086656	Glyma.05G221100.1.p|Glyma.11G101400.1.p|Glyma.18G195900.1.p|Glyma.09G248900.1.p|Glyma.18G057700.1.p|Glyma.20G143900.1.p|Glyma.07G207200.1.p|Glyma.18G243500.1.p|Glyma.01G225200.1.p|Glyma.15G052500.1.p|Glyma.12G027300.1.p|Glyma.07G085200.1.p|Glyma.05G129600.1.p|Glyma.11G035200.1.p|Glyma.08G084300.1.p|Glyma.11G248000.1.p	http://www.genome.jp/kegg-bin/show_pathway?gmx01212/gmx:547575%09red/gmx:100217331%09red/gmx:548028%09red/gmx:100780325%09red/gmx:100817945%09red/gmx:100814965%09red/gmx:100806814%09red/gmx:548072%09red/gmx:100301904%09red/gmx:547625%09red/gmx:100785606%09red/gmx:732644%09red/gmx:100777266%09red/gmx:100037462%09red/gmx:100778244%09red/gmx:547498%09red
Terpenoid backbone biosynthesis	KEGG PATHWAY	gmx00900	13	91	0.000525766	0.00124869	Glyma.11G021400.1.p|Glyma.20G109900.1.p|Glyma.16G089000.1.p|Glyma.17G002400.1.p|Glyma.12G046000.1.p|Glyma.08G093400.1.p|Glyma.13G072700.1.p|Glyma.05G026200.1.p|Glyma.17G100700.1.p|Glyma.09G015600.1.p|Glyma.11G120900.1.p|Glyma.13G262200.1.p|Glyma.13G326400.2.p	http://www.genome.jp/kegg-bin/show_pathway?gmx00900/gmx:100801743%09red/gmx:100817632%09red/gmx:100779933%09red/gmx:100788186%09red/gmx:100779074%09red/gmx:100306378%09red/gmx:100805941%09red/gmx:100805316%09red/gmx:100818067%09red/gmx:100802347%09red/gmx:100814603%09red/gmx:100800990%09red/gmx:100783538%09red
Galactose metabolism	KEGG PATHWAY	gmx00052	14	111	0.000992542	0.00230918	Glyma.20G153600.1.p|Glyma.12G036700.1.p|Glyma.10G194300.1.p|Glyma.05G056300.1.p|Glyma.13G152500.1.p|Glyma.18G215700.1.p|Glyma.14G210700.1.p|Glyma.07G126400.1.p|Glyma.09G239800.1.p|Glyma.15G133700.1.p|Glyma.07G102900.1.p|Glyma.07G124500.1.p|Glyma.17G138500.1.p|Glyma.10G241000.1.p	http://www.genome.jp/kegg-bin/show_pathway?gmx00052/gmx:100806500%09red/gmx:100777498%09red/gmx:100790112%09red/gmx:100798975%09red/gmx:100799487%09red/gmx:100820495%09red/gmx:100786385%09red/gmx:100778321%09red/gmx:100802730%09red/gmx:100812330%09red/gmx:100776238%09red/gmx:100788844%09red/gmx:100794066%09red/gmx:100776597%09red
Biotin metabolism	KEGG PATHWAY	gmx00780	6	27	0.00254863	0.00568237	Glyma.11G101400.1.p|Glyma.15G052500.1.p|Glyma.12G027300.1.p|Glyma.05G129600.1.p|Glyma.08G084300.1.p|Glyma.11G248000.1.p	http://www.genome.jp/kegg-bin/show_pathway?gmx00780/gmx:548028%09red/gmx:100817945%09red/gmx:547575%09red/gmx:100785606%09red/gmx:100806814%09red/gmx:100777266%09red
Cyanoamino acid metabolism	KEGG PATHWAY	gmx00460	11	84	0.00255564	0.00568237	Glyma.08G108900.2.p|Glyma.18G150000.1.p|Glyma.10G106600.1.p|Glyma.14G184500.1.p|Glyma.08G150400.1.p|Glyma.13G222300.1.p|Glyma.08G274400.1.p|Glyma.09G258000.1.p|Glyma.11G180900.1.p|Glyma.07G100500.1.p|Glyma.18G021100.1.p	http://www.genome.jp/kegg-bin/show_pathway?gmx00460/gmx:100305381%09red/gmx:100806420%09red/gmx:100499635%09red/gmx:100797040%09red/gmx:547729%09red/gmx:100305380%09red/gmx:100809047%09red/gmx:100812952%09red/gmx:100814740%09red/gmx:100778110%09red
Linoleic acid metabolism	KEGG PATHWAY	gmx00591	8	48	0.00259196	0.00568237	Glyma.20G054000.1.p|Glyma.15G026500.1.p|Glyma.07G007000.1.p|Glyma.07G034900.1.p|Glyma.11G130200.1.p|Glyma.15G026400.1.p|Glyma.07G006900.1.p|Glyma.07G034800.1.p	http://www.genome.jp/kegg-bin/show_pathway?gmx00591/gmx:547856%09red/gmx:547835%09red/gmx:100802459%09red/gmx:100803358%09red/gmx:100101853%09red/gmx:106794093%09red/gmx:100127399%09red/gmx:100786646%09red
Phenylpropanoid biosynthesis	KEGG PATHWAY	gmx00940	27	332	0.00377944	0.00812936	Glyma.03G145600.1.p|Glyma.02G234200.1.p|Glyma.16G164200.1.p|Glyma.14G201800.1.p|Glyma.10G106600.1.p|Glyma.09G022400.1.p|Glyma.17G171100.1.p|Glyma.10G262400.1.p|Glyma.08G145900.1.p|Glyma.10G222500.1.p|Glyma.07G100500.1.p|Glyma.12G129500.1.p|Glyma.09G022900.1.p|Glyma.08G150400.1.p|Glyma.07G087500.1.p|Glyma.20G169200.1.p|Glyma.20G214200.1.p|Glyma.09G277800.1.p|Glyma.14G053700.1.p|Glyma.19G091800.1.p…	http://www.genome.jp/kegg-bin/show_pathway?gmx00940/gmx:100783920%09red/gmx:547499%09red/gmx:100809071%09red/gmx:100777558%09red/gmx:100793973%09red/gmx:100815671%09red/gmx:100814740%09red/gmx:100814455%09red/gmx:100817540%09red/gmx:100795575%09red/gmx:100806561%09red/gmx:547550%09red/gmx:100305498%09red/gmx:548068%09red/gmx:100775837%09red/gmx:100804126%09red/gmx:547729%09red/gmx:100809047%09red…
Other glycan degradation	KEGG PATHWAY	gmx00511	6	31	0.00462298	0.00958218	Glyma.04G200900.1.p|Glyma.10G260900.1.p|Glyma.18G286200.1.p|Glyma.02G046800.1.p|Glyma.10G290900.1.p|Glyma.16G048100.1.p	http://www.genome.jp/kegg-bin/show_pathway?gmx00511/gmx:100817294%09red/gmx:100814818%09red/gmx:100776871%09red/gmx:100798150%09red/gmx:100776282%09red/gmx:100775419%09red
Selenocompound metabolism	KEGG PATHWAY	gmx00450	6	31	0.00462298	0.00958218	Glyma.10G113100.1.p|Glyma.19G114500.2.p|Glyma.10G242600.1.p|Glyma.13G051000.1.p|Glyma.02G185300.1.p|Glyma.16G038300.1.p	http://www.genome.jp/kegg-bin/show_pathway?gmx00450/gmx:547643%09red/gmx:100794561%09red/gmx:100805275%09red/gmx:100819254%09red/gmx:100802039%09red/gmx:547634%09red
Folate biosynthesis	KEGG PATHWAY	gmx00790	6	36	0.00869889	0.0177085	Glyma.13G267900.1.p|Glyma.13G268000.1.p|Glyma.03G203800.4.p|Glyma.02G251400.1.p|Glyma.13G267800.1.p|Glyma.07G068300.1.p	http://www.genome.jp/kegg-bin/show_pathway?gmx00790/gmx:100527653%09red/gmx:547881%09red/gmx:100526908%09red/gmx:100796947%09red/gmx:100811054%09red
Protein export	KEGG PATHWAY	gmx03060	10	91	0.011655	0.02331	Glyma.08G025900.1.p|Glyma.12G064100.1.p|Glyma.11G245300.1.p|Glyma.08G038100.1.p|Glyma.03G015600.1.p|Glyma.08G346000.2.p|Glyma.05G219400.1.p|Glyma.03G196900.1.p|Glyma.20G224600.1.p|Glyma.10G162200.1.p	http://www.genome.jp/kegg-bin/show_pathway?gmx03060/gmx:100811012%09red/gmx:100782581%09red/gmx:100817173%09red/gmx:547838%09red/gmx:100500409%09red/gmx:100815810%09red/gmx:100803843%09red/gmx:100815190%09red/gmx:100807037%09red/gmx:100791073%09red
Valine, leucine and isoleucine degradation	KEGG PATHWAY	gmx00280	10	93	0.0132614	0.0258516	Glyma.02G131500.1.p|Glyma.11G045300.1.p|Glyma.06G183900.1.p|Glyma.02G145300.1.p|Glyma.07G232900.1.p|Glyma.08G002700.1.p|Glyma.17G037900.1.p|Glyma.15G143100.1.p|Glyma.15G178400.1.p|Glyma.08G204300.1.p	http://www.genome.jp/kegg-bin/show_pathway?gmx00280/gmx:100811501%09red/gmx:547523%09red/gmx:100798328%09red/gmx:100788043%09red/gmx:100810130%09red/gmx:100803176%09red/gmx:100800699%09red/gmx:100791763%09red/gmx:100811186%09red/gmx:548094%09red
Pyrimidine metabolism	KEGG PATHWAY	gmx00240	18	217	0.0133794	0.0258516	Glyma.16G043500.1.p|Glyma.03G088500.1.p|Glyma.04G216000.1.p|Glyma.16G043400.1.p|Glyma.17G127400.1.p|Glyma.16G036100.1.p|Glyma.10G125100.1.p|Glyma.07G105400.1.p|Glyma.06G150000.1.p|Glyma.10G113100.1.p|Glyma.16G083500.1.p|Glyma.15G045100.1.p|Glyma.11G154200.4.p|Glyma.03G069600.1.p|Glyma.07G115900.1.p|Glyma.03G102700.1.p|Glyma.05G216700.1.p|Glyma.02G185300.1.p	http://www.genome.jp/kegg-bin/show_pathway?gmx00240/gmx:100797877%09red/gmx:100811753%09red/gmx:100306684%09red/gmx:100794561%09red/gmx:100818990%09red/gmx:100819254%09red/gmx:100819741%09red/gmx:100782385%09red/gmx:100784833%09red/gmx:100807008%09red/gmx:100788470%09red/gmx:100527475%09red/gmx:100306603%09red/gmx:100499661%09red/gmx:100806168%09red/gmx:100787491%09red/gmx:100797953%09red/gmx:547…
Tropane, piperidine and pyridine alkaloid biosynthesis	KEGG PATHWAY	gmx00960	6	43	0.0180109	0.0339744	Glyma.05G181000.1.p|Glyma.06G082400.1.p|Glyma.18G186400.1.p|Glyma.17G216000.2.p|Glyma.10G090600.1.p|Glyma.18G186800.1.p	http://www.genome.jp/kegg-bin/show_pathway?gmx00960/gmx:547792%09red/gmx:100306108%09red/gmx:100801361%09red/gmx:100804651%09red/gmx:100786456%09red/gmx:547509%09red
Pantothenate and CoA biosynthesis	KEGG PATHWAY	gmx00770	7	56	0.0181793	0.0339744	Glyma.11G045300.1.p|Glyma.07G105400.1.p|Glyma.13G207900.1.p|Glyma.12G122900.1.p|Glyma.05G167700.1.p|Glyma.13G291300.1.p|Glyma.15G072500.1.p	http://www.genome.jp/kegg-bin/show_pathway?gmx00770/gmx:100779210%09red/gmx:100783934%09red/gmx:100798328%09red/gmx:100818990%09red/gmx:100806689%09red/gmx:100812763%09red/gmx:100789879%09red
RNA degradation	KEGG PATHWAY	gmx03018	16	193	0.0189801	0.0348989	Glyma.08G337200.1.p|Glyma.02G155300.1.p|Glyma.18G229600.2.p|Glyma.02G103900.1.p|Glyma.20G079300.1.p|Glyma.10G194300.1.p|Glyma.16G036100.1.p|Glyma.08G175900.1.p|Glyma.15G250500.1.p|Glyma.07G126400.1.p|Glyma.07G215300.3.p|Glyma.10G193200.1.p|Glyma.03G190500.1.p|Glyma.19G190900.1.p|Glyma.17G240400.1.p|Glyma.02G082300.1.p	http://www.genome.jp/kegg-bin/show_pathway?gmx03018/gmx:547752%09red/gmx:100795851%09red/gmx:100819369%09red/gmx:100813735%09red/gmx:100499782%09red/gmx:100811385%09red/gmx:100780329%09red/gmx:100819741%09red/gmx:100811084%09red/gmx:100777674%09red/gmx:100811995%09red/gmx:100820495%09red/gmx:100818544%09red/gmx:100798228%09red/gmx:100797765%09red/gmx:100776597%09red
Pentose and glucuronate interconversions	KEGG PATHWAY	gmx00040	16	194	0.0197543	0.0352987	Glyma.15G127500.1.p|Glyma.17G066200.3.p|Glyma.12G036700.1.p|Glyma.08G044000.1.p|Glyma.19G088400.1.p|Glyma.06G183900.1.p|Glyma.04G088400.1.p|Glyma.19G212600.1.p|Glyma.14G210700.1.p|Glyma.13G152500.1.p|Glyma.16G199200.1.p|Glyma.08G002700.1.p|Glyma.08G243000.1.p|Glyma.05G025300.2.p|Glyma.17G101700.2.p|Glyma.15G184400.1.p	http://www.genome.jp/kegg-bin/show_pathway?gmx00040/gmx:100811501%09red/gmx:100806500%09red/gmx:100785701%09red/gmx:100790112%09red/gmx:100778495%09red/gmx:100777500%09red/gmx:100500085%09red/gmx:100775898%09red/gmx:100800699%09red/gmx:100804624%09red/gmx:100813592%09red/gmx:548074%09red/gmx:100786514%09red/gmx:100820630%09red/gmx:100794066%09red/gmx:100817791%09red
Tyrosine metabolism	KEGG PATHWAY	gmx00350	9	85	0.0198168	0.0352987	Glyma.05G181000.1.p|Glyma.06G082400.1.p|Glyma.17G216000.2.p|Glyma.06G122600.1.p|Glyma.09G010000.1.p|Glyma.13G183200.1.p|Glyma.06G270400.1.p|Glyma.03G168700.1.p|Glyma.10G090600.1.p	http://www.genome.jp/kegg-bin/show_pathway?gmx00350/gmx:547792%09red/gmx:100817986%09red/gmx:100801361%09red/gmx:100801918%09red/gmx:100804651%09red/gmx:547509%09red/gmx:100499743%09red/gmx:100798709%09red/gmx:100792012%09red
Isoquinoline alkaloid biosynthesis	KEGG PATHWAY	gmx00950	6	46	0.0235441	0.0412926	Glyma.05G181000.1.p|Glyma.06G082400.1.p|Glyma.17G216000.2.p|Glyma.13G183200.1.p|Glyma.06G270400.1.p|Glyma.10G090600.1.p	http://www.genome.jp/kegg-bin/show_pathway?gmx00950/gmx:547792%09red/gmx:100801361%09red/gmx:100792012%09red/gmx:100804651%09red/gmx:547509%09red/gmx:100798709%09red
Fatty acid degradation	KEGG PATHWAY	gmx00071	9	93	0.0316237	0.0546227	Glyma.06G183900.1.p|Glyma.20G143900.1.p|Glyma.11G035200.1.p|Glyma.06G122600.1.p|Glyma.01G225200.1.p|Glyma.08G002700.1.p|Glyma.07G085200.1.p|Glyma.03G168700.1.p|Glyma.15G178400.1.p	http://www.genome.jp/kegg-bin/show_pathway?gmx00071/gmx:100811501%09red/gmx:100780325%09red/gmx:100814965%09red/gmx:100801918%09red/gmx:100800699%09red/gmx:100301904%09red/gmx:547625%09red/gmx:100499743%09red/gmx:100811186%09red
Lysine degradation	KEGG PATHWAY	gmx00310	6	54	0.0435224	0.0740531	Glyma.02G094300.1.p|Glyma.02G292500.1.p|Glyma.06G183900.1.p|Glyma.14G022100.1.p|Glyma.08G002700.1.p|Glyma.15G178400.1.p	http://www.genome.jp/kegg-bin/show_pathway?gmx00310/gmx:100811501%09red/gmx:100800699%09red/gmx:100813488%09red/gmx:100786978%09red/gmx:100811186%09red/gmx:100799149%09red
Histidine metabolism	KEGG PATHWAY	gmx00340	5	43	0.0542851	0.0910073	Glyma.15G131700.1.p|Glyma.06G183900.1.p|Glyma.03G176400.1.p|Glyma.15G178400.1.p|Glyma.08G002700.1.p	http://www.genome.jp/kegg-bin/show_pathway?gmx00340/gmx:100811501%09red/gmx:100800699%09red/gmx:100816684%09red/gmx:100811186%09red/gmx:100817490%09red
alpha-Linolenic acid metabolism	KEGG PATHWAY	gmx00592	9	106	0.0598949	0.0989568	Glyma.20G054000.1.p|Glyma.01G235600.1.p|Glyma.11G035200.1.p|Glyma.06G122600.1.p|Glyma.11G130200.1.p|Glyma.07G085200.1.p|Glyma.12G191400.1.p|Glyma.18G280900.1.p|Glyma.11G122700.1.p	http://www.genome.jp/kegg-bin/show_pathway?gmx00592/gmx:100810890%09red/gmx:100780325%09red/gmx:547625%09red/gmx:100784395%09red/gmx:100801918%09red/gmx:106794093%09red/gmx:100786646%09red/gmx:100805194%09red/gmx:100803381%09red
Starch and sucrose metabolism	KEGG PATHWAY	gmx00500	28	452	0.0649086	0.105102	Glyma.02G304500.2.p|Glyma.10G106600.1.p|Glyma.14G210700.1.p|Glyma.03G192300.1.p|Glyma.19G212600.1.p|Glyma.08G044000.1.p|Glyma.07G100500.1.p|Glyma.10G241000.1.p|Glyma.02G245800.1.p|Glyma.19G125800.1.p|Glyma.13G062700.1.p|Glyma.05G056300.1.p|Glyma.08G150400.1.p|Glyma.04G092400.1.p|Glyma.04G017700.1.p|Glyma.08G334000.1.p|Glyma.15G184400.1.p|Glyma.20G153600.1.p|Glyma.19G192800.2.p|Glyma.15G133700.1.p…	http://www.genome.jp/kegg-bin/show_pathway?gmx00500/gmx:100775898%09red/gmx:100785701%09red/gmx:100793021%09red/gmx:100788844%09red/gmx:100791285%09red/gmx:100814740%09red/gmx:100794066%09red/gmx:100809452%09red/gmx:100792499%09red/gmx:100790112%09red/gmx:100789789%09red/gmx:100816963%09red/gmx:100799487%09red/gmx:100777500%09red/gmx:547729%09red/gmx:100786385%09red/gmx:100778321%09red/gmx:100809…
Glycosphingolipid biosynthesis - ganglio series	KEGG PATHWAY	gmx00604	2	8	0.0660226	0.105102	Glyma.18G286200.1.p|Glyma.10G290900.1.p	http://www.genome.jp/kegg-bin/show_pathway?gmx00604/gmx:100814818%09red/gmx:100776871%09red
Riboflavin metabolism	KEGG PATHWAY	gmx00740	3	19	0.0663803	0.105102	Glyma.12G112900.1.p|Glyma.13G042600.4.p|Glyma.07G071800.1.p	http://www.genome.jp/kegg-bin/show_pathway?gmx00740/gmx:100791686%09red/gmx:100786393%09red/gmx:100809163%09red
Inositol phosphate metabolism	KEGG PATHWAY	gmx00562	9	111	0.0740596	0.115655	Glyma.15G115500.1.p|Glyma.03G185800.1.p|Glyma.19G186000.1.p|Glyma.13G336200.1.p|Glyma.08G138200.2.p|Glyma.14G059200.1.p|Glyma.15G038100.1.p|Glyma.05G180600.1.p|Glyma.08G086800.1.p	http://www.genome.jp/kegg-bin/show_pathway?gmx00562/gmx:100819824%09red/gmx:100800820%09red/gmx:100817591%09red/gmx:547761%09red/gmx:100799358%09red/gmx:100819908%09red/gmx:100817415%09red/gmx:100796274%09red/gmx:547864%09red
beta-Alanine metabolism	KEGG PATHWAY	gmx00410	8	95	0.075909	0.116941	Glyma.15G178400.1.p|Glyma.16G218500.1.p|Glyma.18G137100.1.p|Glyma.06G183900.1.p|Glyma.10G090600.1.p|Glyma.18G043600.1.p|Glyma.08G002700.1.p|Glyma.07G105400.1.p	http://www.genome.jp/kegg-bin/show_pathway?gmx00410/gmx:100811501%09red/gmx:547724%09red/gmx:100783047%09red/gmx:100776863%09red/gmx:100818990%09red/gmx:100800699%09red/gmx:100804651%09red/gmx:100811186%09red
Glycosphingolipid biosynthesis - globo series	KEGG PATHWAY	gmx00603	3	21	0.0819669	0.12459	Glyma.18G286200.1.p|Glyma.10G290900.1.p|Glyma.18G215700.1.p	http://www.genome.jp/kegg-bin/show_pathway?gmx00603/gmx:100814818%09red/gmx:100776871%09red/gmx:100812330%09red
Tryptophan metabolism	KEGG PATHWAY	gmx00380	6	70	0.108301	0.162452	Glyma.02G094300.1.p|Glyma.06G183900.1.p|Glyma.04G017500.1.p|Glyma.06G017900.1.p|Glyma.08G002700.1.p|Glyma.15G178400.1.p	http://www.genome.jp/kegg-bin/show_pathway?gmx00380/gmx:100811501%09red/gmx:100800699%09red/gmx:100786978%09red/gmx:547511%09red/gmx:100811186%09red/gmx:100037448%09red
Arginine and proline metabolism	KEGG PATHWAY	gmx00330	9	123	0.115782	0.171417	Glyma.18G137100.1.p|Glyma.06G082400.1.p|Glyma.06G183900.1.p|Glyma.17G216000.2.p|Glyma.01G140200.1.p|Glyma.03G028000.1.p|Glyma.08G002700.1.p|Glyma.15G061600.1.p|Glyma.15G178400.1.p	http://www.genome.jp/kegg-bin/show_pathway?gmx00330/gmx:100811501%09red/gmx:100793450%09red/gmx:547792%09red/gmx:100776863%09red/gmx:547994%09red/gmx:100800699%09red/gmx:547509%09red/gmx:100811186%09red/gmx:100789799%09red
Phenylalanine metabolism	KEGG PATHWAY	gmx00360	6	72	0.118702	0.173488	Glyma.05G181000.1.p|Glyma.11G194500.1.p|Glyma.06G082400.1.p|Glyma.17G171100.1.p|Glyma.17G216000.2.p|Glyma.10G090600.1.p	http://www.genome.jp/kegg-bin/show_pathway?gmx00360/gmx:100808944%09red/gmx:547792%09red/gmx:100801361%09red/gmx:100305498%09red/gmx:100804651%09red/gmx:547509%09red
Thiamine metabolism	KEGG PATHWAY	gmx00730	3	27	0.136635	0.197169	Glyma.01G197100.2.p|Glyma.08G188200.1.p|Glyma.10G251500.1.p	http://www.genome.jp/kegg-bin/show_pathway?gmx00730/gmx:100785725%09red/gmx:100788953%09red/gmx:100811722%09red
Monoterpenoid biosynthesis	KEGG PATHWAY	gmx00902	2	14	0.148947	0.21225	Glyma.07G073800.1.p|Glyma.09G262800.1.p	http://www.genome.jp/kegg-bin/show_pathway?gmx00902/gmx:100804943%09red/gmx:100806995%09red
Sulfur relay system	KEGG PATHWAY	gmx04122	2	17	0.195527	0.275186	Glyma.01G197100.2.p|Glyma.08G167100.1.p	http://www.genome.jp/kegg-bin/show_pathway?gmx04122/gmx:100785725%09red/gmx:100798053%09red
Taurine and hypotaurine metabolism	KEGG PATHWAY	gmx00430	3	34	0.211536	0.294087	Glyma.18G043600.1.p|Glyma.16G218500.1.p|Glyma.18G021100.1.p	http://www.genome.jp/kegg-bin/show_pathway?gmx00430/gmx:547724%09red/gmx:100783047%09red/gmx:100797040%09red
Limonene and pinene degradation	KEGG PATHWAY	gmx00903	2	19	0.22747	0.312428	Glyma.06G183900.1.p|Glyma.08G002700.1.p	http://www.genome.jp/kegg-bin/show_pathway?gmx00903/gmx:100811501%09red/gmx:100800699%09red
Steroid biosynthesis	KEGG PATHWAY	gmx00100	4	60	0.295585	0.401151	Glyma.11G112000.1.p|Glyma.04G020600.1.p|Glyma.10G090500.1.p|Glyma.12G028300.2.p	http://www.genome.jp/kegg-bin/show_pathway?gmx00100/gmx:100814521%09red/gmx:100804517%09red/gmx:100775983%09red/gmx:548073%09red
Biosynthesis of unsaturated fatty acids	KEGG PATHWAY	gmx01040	3	44	0.32862	0.435613	Glyma.11G035200.1.p|Glyma.11G248000.1.p|Glyma.07G207200.1.p	http://www.genome.jp/kegg-bin/show_pathway?gmx01040/gmx:100217331%09red/gmx:547625%09red/gmx:100806814%09red
Stilbenoid, diarylheptanoid and gingerol biosynthesis	KEGG PATHWAY	gmx00945	3	44	0.32862	0.435613	Glyma.08G220200.1.p|Glyma.17G171100.1.p|Glyma.18G103500.1.p	http://www.genome.jp/kegg-bin/show_pathway?gmx00945/gmx:100806561%09red/gmx:100803418%09red/gmx:100305498%09red
Carotenoid biosynthesis	KEGG PATHWAY	gmx00906	4	64	0.334756	0.438645	Glyma.18G239900.1.p|Glyma.03G253500.1.p|Glyma.19G251000.1.p|Glyma.11G253000.1.p	http://www.genome.jp/kegg-bin/show_pathway?gmx00906/gmx:100816085%09red/gmx:100127420%09red/gmx:100778118%09red/gmx:100780770%09red
Endocytosis	KEGG PATHWAY	gmx04144	17	334	0.34133	0.442177	Glyma.19G172700.1.p|Glyma.13G364900.2.p|Glyma.09G002100.1.p|Glyma.11G081500.1.p|Glyma.09G068000.1.p|Glyma.08G271700.1.p|Glyma.07G127300.1.p|Glyma.07G170800.1.p|Glyma.03G171100.1.p|Glyma.02G009600.1.p|Glyma.12G064000.1.p|Glyma.13G352200.1.p|Glyma.12G183700.1.p|Glyma.08G211700.1.p|Glyma.04G210200.2.p|Glyma.11G140500.1.p|Glyma.12G147400.1.p	http://www.genome.jp/kegg-bin/show_pathway?gmx04144/gmx:100786410%09red/gmx:100807561%09red/gmx:100784434%09red/gmx:100806836%09red/gmx:100778966%09red/gmx:100775459%09red/gmx:102667572%09red/gmx:100816111%09red/gmx:100802587%09red/gmx:100778302%09red/gmx:100780154%09red/gmx:100785169%09red/gmx:100812707%09red/gmx:100798307%09red/gmx:100795747%09red/gmx:100791887%09red/gmx:100814486%09red
Flavonoid biosynthesis	KEGG PATHWAY	gmx00941	5	86	0.353088	0.45227	Glyma.08G220200.1.p|Glyma.18G103500.1.p|Glyma.17G171100.1.p|Glyma.06G118500.1.p|Glyma.20G241500.1.p	http://www.genome.jp/kegg-bin/show_pathway?gmx00941/gmx:100794652%09red/gmx:100806561%09red/gmx:100803418%09red/gmx:547602%09red/gmx:100305498%09red
Ether lipid metabolism	KEGG PATHWAY	gmx00565	3	47	0.364225	0.461352	Glyma.08G211700.1.p|Glyma.13G364900.2.p|Glyma.11G081500.1.p	http://www.genome.jp/kegg-bin/show_pathway?gmx00565/gmx:100784434%09red/gmx:100814486%09red/gmx:100786410%09red
Flavone and flavonol biosynthesis	KEGG PATHWAY	gmx00944	1	10	0.383133	0.479969	Glyma.06G137100.1.p	http://www.genome.jp/kegg-bin/show_pathway?gmx00944/gmx:100805999%09red
Glycosaminoglycan degradation	KEGG PATHWAY	gmx00531	2	30	0.402334	0.498545	Glyma.18G286200.1.p|Glyma.10G290900.1.p	http://www.genome.jp/kegg-bin/show_pathway?gmx00531/gmx:100814818%09red/gmx:100776871%09red
SNARE interactions in vesicular transport	KEGG PATHWAY	gmx04130	4	87	0.552838	0.677672	Glyma.10G051400.1.p|Glyma.01G015600.1.p|Glyma.13G060700.1.p|Glyma.18G089600.1.p	http://www.genome.jp/kegg-bin/show_pathway?gmx04130/gmx:100816145%09red/gmx:100794038%09red/gmx:100819272%09red/gmx:100810149%09red
Glycerolipid metabolism	KEGG PATHWAY	gmx00561	6	135	0.567493	0.681215	Glyma.12G036700.1.p|Glyma.15G012500.1.p|Glyma.06G183900.1.p|Glyma.18G215700.1.p|Glyma.08G002700.1.p|Glyma.15G178400.1.p	http://www.genome.jp/kegg-bin/show_pathway?gmx00561/gmx:100811501%09red/gmx:100806500%09red/gmx:100800699%09red/gmx:100812330%09red/gmx:100806896%09red/gmx:100811186%09red
Ubiquinone and other terpenoid-quinone biosynthesis	KEGG PATHWAY	gmx00130	4	89	0.570124	0.681215	Glyma.02G002000.2.p|Glyma.11G194500.1.p|Glyma.07G188200.1.p|Glyma.08G285500.1.p	http://www.genome.jp/kegg-bin/show_pathway?gmx00130/gmx:100805113%09red/gmx:100808944%09red/gmx:100788766%09red/gmx:100807101%09red
Ribosome biogenesis in eukaryotes	KEGG PATHWAY	gmx03008	7	159	0.573655	0.681215	Glyma.04G069200.1.p|Glyma.19G110900.1.p|Glyma.18G020000.1.p|Glyma.05G104200.1.p|Glyma.03G164500.1.p|Glyma.13G167800.1.p|Glyma.19G165900.1.p	http://www.genome.jp/kegg-bin/show_pathway?gmx03008/gmx:100306376%09red/gmx:100500467%09red/gmx:100813605%09red/gmx:100789137%09red/gmx:100819679%09red/gmx:100788981%09red/gmx:100527424%09red
Plant-pathogen interaction	KEGG PATHWAY	gmx04626	14	325	0.597981	0.700779	Glyma.08G177600.1.p|Glyma.11G030100.1.p|Glyma.01G211700.1.p|Glyma.15G062700.1.p|Glyma.08G053500.3.p|Glyma.02G008500.1.p|Glyma.01G068000.1.p|Glyma.16G176200.2.p|Glyma.02G302500.1.p|Glyma.18G074100.1.p|Glyma.09G131500.1.p|Glyma.17G258700.1.p|Glyma.02G275600.1.p|Glyma.14G219700.1.p	http://www.genome.jp/kegg-bin/show_pathway?gmx04626/gmx:100779976%09red/gmx:100808383%09red/gmx:100500081%09red/gmx:100785017%09red/gmx:100527568%09red/gmx:100794671%09red/gmx:100811234%09red/gmx:100783572%09red/gmx:100807250%09red/gmx:100780174%09red/gmx:100194422%09red/gmx:100194423%09red/gmx:100819942%09red/gmx:100817351%09red
Sesquiterpenoid and triterpenoid biosynthesis	KEGG PATHWAY	gmx00909	1	20	0.602424	0.700779	Glyma.11G112000.1.p	http://www.genome.jp/kegg-bin/show_pathway?gmx00909/gmx:100775983%09red
Nucleotide excision repair	KEGG PATHWAY	gmx03420	5	122	0.640965	0.738081	Glyma.13G236400.1.p|Glyma.01G030600.1.p|Glyma.20G114700.1.p|Glyma.01G081500.1.p|Glyma.01G030800.1.p	http://www.genome.jp/kegg-bin/show_pathway?gmx03420/gmx:100526985%09red/gmx:100499859%09red/gmx:100814162%09red/gmx:100809066%09red/gmx:100499987%09red
Mismatch repair	KEGG PATHWAY	gmx03430	3	74	0.648155	0.738897	Glyma.13G236400.1.p|Glyma.01G030600.1.p|Glyma.01G030800.1.p	http://www.genome.jp/kegg-bin/show_pathway?gmx03430/gmx:100526985%09red/gmx:100499859%09red/gmx:100499987%09red
Homologous recombination	KEGG PATHWAY	gmx03440	3	81	0.705275	0.796053	Glyma.13G236400.1.p|Glyma.01G030600.1.p|Glyma.01G030800.1.p	http://www.genome.jp/kegg-bin/show_pathway?gmx03440/gmx:100526985%09red/gmx:100499859%09red/gmx:100499987%09red
Phosphatidylinositol signaling system	KEGG PATHWAY	gmx04070	4	118	0.773808	0.864845	Glyma.15G115500.1.p|Glyma.02G275600.1.p|Glyma.14G059200.1.p|Glyma.08G086800.1.p	http://www.genome.jp/kegg-bin/show_pathway?gmx04070/gmx:100817415%09red/gmx:100817591%09red/gmx:547864%09red/gmx:100817351%09red
AGE-RAGE signaling pathway in diabetic complications	KEGG PATHWAY	gmx04933	1	35	0.794318	0.879148	Glyma.14G059200.1.p	http://www.genome.jp/kegg-bin/show_pathway?gmx04933/gmx:547864%09red
Nicotinate and nicotinamide metabolism	KEGG PATHWAY	gmx00760	1	38	0.819722	0.898542	Glyma.09G118600.1.p	http://www.genome.jp/kegg-bin/show_pathway?gmx00760/gmx:100794013%09red
DNA replication	KEGG PATHWAY	gmx03030	3	106	0.852175	0.925218	Glyma.13G236400.1.p|Glyma.01G030600.1.p|Glyma.01G030800.1.p	http://www.genome.jp/kegg-bin/show_pathway?gmx03030/gmx:100526985%09red/gmx:100499859%09red/gmx:100499987%09red
Sphingolipid metabolism	KEGG PATHWAY	gmx00600	1	47	0.878616	0.944927	Glyma.18G215700.1.p	http://www.genome.jp/kegg-bin/show_pathway?gmx00600/gmx:100812330%09red
Basal transcription factors	KEGG PATHWAY	gmx03022	2	89	0.906688	0.966004	Glyma.17G037200.1.p|Glyma.04G027700.1.p	http://www.genome.jp/kegg-bin/show_pathway?gmx03022/gmx:100306277%09red/gmx:100788473%09red
Circadian rhythm - plant	KEGG PATHWAY	gmx04712	2	98	0.932194	0.971484	Glyma.05G104200.1.p|Glyma.06G118500.1.p	http://www.genome.jp/kegg-bin/show_pathway?gmx04712/gmx:100794652%09red/gmx:100819679%09red
Glycerophospholipid metabolism	KEGG PATHWAY	gmx00564	4	173	0.948665	0.971484	Glyma.08G211700.1.p|Glyma.13G364900.2.p|Glyma.17G078900.1.p|Glyma.11G081500.1.p	http://www.genome.jp/kegg-bin/show_pathway?gmx00564/gmx:100784434%09red/gmx:100800181%09red/gmx:100814486%09red/gmx:100786410%09red
Base excision repair	KEGG PATHWAY	gmx03410	1	69	0.953854	0.971484	Glyma.01G116000.6.p	http://www.genome.jp/kegg-bin/show_pathway?gmx03410/gmx:100305961%09red
Ubiquitin mediated proteolysis	KEGG PATHWAY	gmx04120	5	214	0.960738	0.971484	Glyma.01G163900.1.p|Glyma.09G257800.1.p|Glyma.11G064000.1.p|Glyma.10G133700.1.p|Glyma.04G096900.1.p	http://www.genome.jp/kegg-bin/show_pathway?gmx04120/gmx:100812184%09red/gmx:100813186%09red/gmx:100800213%09red/gmx:100812138%09red/gmx:100809769%09red
RNA polymerase	KEGG PATHWAY	gmx03020	1	73	0.961297	0.971484	Glyma.03G088500.1.p	http://www.genome.jp/kegg-bin/show_pathway?gmx03020/gmx:100499661%09red
N-Glycan biosynthesis	KEGG PATHWAY	gmx00510	1	74	0.962962	0.971484	Glyma.12G045400.1.p	http://www.genome.jp/kegg-bin/show_pathway?gmx00510/gmx:100806848%09red
Plant hormone signal transduction	KEGG PATHWAY	gmx04075	5	618	1	1	Glyma.04G039300.1.p|Glyma.12G169800.1.p|Glyma.01G097000.1.p|Glyma.01G018800.1.p|Glyma.15G062700.1.p	http://www.genome.jp/kegg-bin/show_pathway?gmx04075/gmx:100819313%09red/gmx:100819216%09red/gmx:100809324%09red/gmx:100791384%09red/gmx:100807250%09red
--------------------
#Term	Database	ID	Input number	Background number	P-Value	Corrected P-Value	Input	Hyperlink
--------------------
#Term	Database	ID	Input number	Background number	P-Value	Corrected P-Value	Input	Hyperlink
--------------------

## Sheet: identified_prot.0.5h.enrich
##Databases: KEGG PATHWAY
##Statistical test method: hypergeometric test / Fisher's exact test
##FDR correction method: Benjamini and Hochberg
#Term	Database	ID	Input number	Background number	P-Value	Corrected P-Value	Input	Hyperlink
Metabolic pathways	KEGG PATHWAY	gmx01100	598	3553	2.67185e-149	3.04591e-147	Glyma.03G145600.1.p|Glyma.20G212900.1.p|Glyma.08G082900.1.p|Glyma.02G138400.1.p|Glyma.18G195900.1.p|Glyma.14G210700.1.p|Glyma.13G152500.1.p|Glyma.18G244900.1.p|Glyma.15G248500.1.p|Glyma.10G214200.3.p|Glyma.01G164300.1.p|Glyma.18G280900.1.p|Glyma.17G091000.1.p|Glyma.17G066200.3.p|Glyma.08G164100.1.p|Glyma.06G082400.1.p|Glyma.05G151100.1.p|Glyma.04G193500.1.p|Glyma.12G215100.1.p|Glyma.08G002700.1.p…	http://www.genome.jp/kegg-bin/show_pathway?gmx01100/gmx:100810730%09red/gmx:100801466%09red/gmx:100779074%09red/gmx:732570%09red/gmx:732571%09red/gmx:100796226%09red/gmx:100781928%09red/gmx:100811326%09red/gmx:100306034%09red/gmx:100797626%09red/gmx:100790112%09red/gmx:100813292%09red/gmx:100817945%09red/gmx:100801918%09red/gmx:100800699%09red/gmx:100816963%09red/gmx:100814183%09red/gmx:100789125…
Biosynthesis of secondary metabolites	KEGG PATHWAY	gmx01110	342	2026	4.40281e-82	2.5096e-80	Glyma.03G145600.1.p|Glyma.02G138400.1.p|Glyma.18G229700.1.p|Glyma.18G244900.1.p|Glyma.15G248500.1.p|Glyma.01G164300.1.p|Glyma.18G280900.1.p|Glyma.17G091000.1.p|Glyma.08G164100.1.p|Glyma.06G082400.1.p|Glyma.05G151100.1.p|Glyma.04G193500.1.p|Glyma.08G002700.1.p|Glyma.03G190500.1.p|Glyma.16G004400.1.p|Glyma.08G334000.1.p|Glyma.08G292800.1.p|Glyma.11G021400.1.p|Glyma.01G227400.1.p|Glyma.05G046300.1.p…	http://www.genome.jp/kegg-bin/show_pathway?gmx01110/gmx:100814810%09red/gmx:100819824%09red/gmx:547602%09red/gmx:547963%09red/gmx:100783986%09red/gmx:547550%09red/gmx:100786393%09red/gmx:100788930%09red/gmx:100818028%09red/gmx:100809241%09red/gmx:547631%09red/gmx:100801466%09red/gmx:106797124%09red/gmx:100786103%09red/gmx:100783091%09red/gmx:100790249%09red/gmx:100820392%09red/gmx:100499743%09red…
Carbon metabolism	KEGG PATHWAY	gmx01200	160	488	1.38877e-70	5.27734e-69	Glyma.07G182300.1.p|Glyma.10G039000.1.p|Glyma.10G194300.1.p|Glyma.07G142700.1.p|Glyma.02G138400.1.p|Glyma.18G195900.1.p|Glyma.19G186000.1.p|Glyma.12G210600.1.p|Glyma.20G129400.1.p|Glyma.18G244900.1.p|Glyma.15G248500.1.p|Glyma.05G000700.2.p|Glyma.08G302600.1.p|Glyma.05G026300.1.p|Glyma.08G020500.1.p|Glyma.20G114500.2.p|Glyma.19G088400.1.p|Glyma.06G082400.1.p|Glyma.16G028700.1.p|Glyma.03G244800.2.p…	http://www.genome.jp/kegg-bin/show_pathway?gmx01200/gmx:100819824%09red/gmx:100780041%09red/gmx:100818028%09red/gmx:100809241%09red/gmx:547631%09red/gmx:100801466%09red/gmx:100802847%09red/gmx:100797319%09red/gmx:100499743%09red/gmx:732571%09red/gmx:100781928%09red/gmx:100805786%09red/gmx:100789900%09red/gmx:100811326%09red/gmx:547963%09red/gmx:100799358%09red/gmx:100789100%09red/gmx:100798113%09…
Biosynthesis of amino acids	KEGG PATHWAY	gmx01230	127	429	4.69185e-52	1.33718e-50	Glyma.02G138400.1.p|Glyma.09G235400.1.p|Glyma.03G181200.1.p|Glyma.19G186000.1.p|Glyma.20G129400.1.p|Glyma.13G144900.1.p|Glyma.05G000700.2.p|Glyma.01G164300.1.p|Glyma.04G236900.1.p|Glyma.19G088400.1.p|Glyma.06G082400.1.p|Glyma.05G151100.1.p|Glyma.13G131900.1.p|Glyma.03G244800.2.p|Glyma.04G193500.1.p|Glyma.10G211400.1.p|Glyma.16G046900.1.p|Glyma.19G114500.2.p|Glyma.08G157700.1.p|Glyma.03G190500.1.p…	http://www.genome.jp/kegg-bin/show_pathway?gmx01230/gmx:100819824%09red/gmx:100818028%09red/gmx:547631%09red/gmx:100801466%09red/gmx:100808361%09red/gmx:100786103%09red/gmx:100820392%09red/gmx:100808771%09red/gmx:732570%09red/gmx:100805786%09red/gmx:100789900%09red/gmx:100811326%09red/gmx:100780873%09red/gmx:100807276%09red/gmx:100806689%09red/gmx:100799358%09red/gmx:100812202%09red/gmx:100786832…
Ribosome	KEGG PATHWAY	gmx03010	147	595	8.0337e-52	1.83168e-50	Glyma.15G185000.1.p|Glyma.04G224000.1.p|Glyma.13G285600.1.p|Glyma.09G255500.1.p|Glyma.20G237400.1.p|Glyma.15G102600.1.p|Glyma.13G243100.1.p|Glyma.02G085300.1.p|Glyma.12G184900.2.p|Glyma.07G114900.2.p|Glyma.02G103600.1.p|Glyma.08G141700.1.p|Glyma.13G237800.1.p|Glyma.09G138400.1.p|Glyma.11G146300.1.p|Glyma.13G136400.1.p|Glyma.08G151900.1.p|Glyma.08G159800.1.p|Glyma.10G067800.1.p|Glyma.19G145100.1.p…	http://www.genome.jp/kegg-bin/show_pathway?gmx03010/gmx:100305682%09red/gmx:100794937%09red/gmx:100786828%09red/gmx:3989263%09red/gmx:100795924%09red/gmx:100802137%09red/gmx:100793713%09red/gmx:100811498%09red/gmx:100811654%09red/gmx:100305981%09red/gmx:100499742%09red/gmx:100800463%09red/gmx:100500355%09red/gmx:100782305%09red/gmx:100499912%09red/gmx:100499910%09red/gmx:100500112%09red/gmx:10080…
Carbon fixation in photosynthetic organisms	KEGG PATHWAY	gmx00710	63	129	2.15544e-36	4.09533e-35	Glyma.19G106800.1.p|Glyma.07G182300.1.p|Glyma.10G205500.1.p|Glyma.18G193600.1.p|Glyma.12G061600.1.p|Glyma.10G006500.1.p|Glyma.14G010900.1.p|Glyma.07G142700.1.p|Glyma.12G037400.1.p|Glyma.17G020600.1.p|Glyma.19G186000.1.p|Glyma.12G210600.1.p|Glyma.02G038100.2.p|Glyma.15G136200.1.p|Glyma.12G159300.1.p|Glyma.17G101700.2.p|Glyma.10G059500.1.p|Glyma.05G026300.1.p|Glyma.06G275700.1.p|Glyma.01G026700.1.p…	http://www.genome.jp/kegg-bin/show_pathway?gmx00710/gmx:100819824%09red/gmx:100777515%09red/gmx:547963%09red/gmx:100527532%09red/gmx:100818028%09red/gmx:100792666%09red/gmx:547756%09red/gmx:100807126%09red/gmx:100797319%09red/gmx:547755%09red/gmx:100786122%09red/gmx:732571%09red/gmx:547514%09red/gmx:100794277%09red/gmx:100127415%09red/gmx:100799793%09red/gmx:100802480%09red/gmx:100806545%09red/gm…
Photosynthesis	KEGG PATHWAY	gmx00195	58	120	1.98017e-33	3.22485e-32	Glyma.01G238000.1.p|Glyma.01G153500.1.p|Glyma.13G204800.1.p|Glyma.09G250800.1.p|Glyma.08G126800.1.p|Glyma.05G022900.1.p|Glyma.15G130100.1.p|Glyma.08G304200.1.p|Glyma.04G249700.1.p|Glyma.10G249000.1.p|Glyma.18G114900.1.p|Glyma.03G114600.1.p|Glyma.10G040600.1.p|Glyma.06G067400.1.p|Glyma.01G180800.1.p|Glyma.12G202500.1.p|Glyma.02G047600.1.p|Glyma.05G074900.1.p|Glyma.15G016300.1.p|Glyma.17G130100.1.p…	http://www.genome.jp/kegg-bin/show_pathway?gmx00195/gmx:100101915%09red/gmx:100785563%09red/gmx:100499708%09red/gmx:100781848%09red/gmx:100797290%09red/gmx:3989266%09red/gmx:3989267%09red/gmx:100814163%09red/gmx:3989327%09red/gmx:3989326%09red/gmx:100306554%09red/gmx:100499729%09red/gmx:100527009%09red/gmx:3989309%09red/gmx:100780777%09red/gmx:100306034%09red/gmx:100802315%09red/gmx:100802032%09r…
Glyoxylate and dicarboxylate metabolism	KEGG PATHWAY	gmx00630	53	130	7.69292e-28	1.09624e-26	Glyma.13G210800.2.p|Glyma.12G061600.1.p|Glyma.10G006500.1.p|Glyma.15G012500.1.p|Glyma.08G175800.1.p|Glyma.09G247900.1.p|Glyma.05G026300.1.p|Glyma.07G232900.1.p|Glyma.05G045900.1.p|Glyma.02G038100.2.p|Glyma.08G302600.1.p|Glyma.01G026700.1.p|Glyma.12G159300.1.p|Glyma.15G143100.1.p|Glyma.20G019600.1.p|Glyma.09G173200.1.p|Glyma.18G116900.1.p|Glyma.16G028700.1.p|Glyma.18G296900.1.p|Glyma.20G107800.1.p…	http://www.genome.jp/kegg-bin/show_pathway?gmx00630/gmx:100779623%09red/gmx:100793264%09red/gmx:547963%09red/gmx:3989271%09red/gmx:100809241%09red/gmx:100803176%09red/gmx:100802847%09red/gmx:100812952%09red/gmx:547511%09red/gmx:100817216%09red/gmx:100781928%09red/gmx:100811402%09red/gmx:100794277%09red/gmx:100781418%09red/gmx:100127415%09red/gmx:100799793%09red/gmx:100780873%09red/gmx:547953%09re…
Oxidative phosphorylation	KEGG PATHWAY	gmx00190	66	237	2.1504e-26	2.72384e-25	Glyma.13G367000.1.p|Glyma.05G214200.1.p|Glyma.03G180700.1.p|Glyma.07G032800.1.p|Glyma.05G110100.1.p|Glyma.05G223100.1.p|Glyma.14G177100.2.p|Glyma.20G108500.1.p|Glyma.13G127400.2.p|Glyma.11G070800.2.p|Glyma.10G052700.1.p|Glyma.10G267200.1.p|Glyma.16G050200.1.p|Glyma.08G209700.1.p|Glyma.09G245700.1.p|Glyma.11G091800.1.p|Glyma.13G362900.2.p|Glyma.09G014000.1.p|Glyma.16G142600.1.p|Glyma.17G160400.1.p…	http://www.genome.jp/kegg-bin/show_pathway?gmx00190/gmx:100817153%09red/gmx:100306371%09red/gmx:100306258%09red/gmx:100306645%09red/gmx:100775727%09red/gmx:100780778%09red/gmx:100791692%09red/gmx:100798544%09red/gmx:100306450%09red/gmx:3989298%09red/gmx:100802040%09red/gmx:100527776%09red/gmx:100814088%09red/gmx:100526984%09red/gmx:100787109%09red/gmx:100500040%09red/gmx:100799603%09red/gmx:10078…
Pyruvate metabolism	KEGG PATHWAY	gmx00620	58	180	5.02845e-26	5.73243e-25	Glyma.10G205500.1.p|Glyma.10G006500.1.p|Glyma.03G102900.1.p|Glyma.10G065000.1.p|Glyma.02G026800.1.p|Glyma.18G195900.1.p|Glyma.17G020600.1.p|Glyma.12G210600.1.p|Glyma.07G232900.1.p|Glyma.15G248500.1.p|Glyma.05G000700.2.p|Glyma.12G159300.1.p|Glyma.05G026300.1.p|Glyma.15G178400.1.p|Glyma.20G114500.2.p|Glyma.15G143100.1.p|Glyma.17G091000.1.p|Glyma.14G186900.2.p|Glyma.20G176300.1.p|Glyma.12G161300.1.p…	http://www.genome.jp/kegg-bin/show_pathway?gmx00620/gmx:100800280%09red/gmx:100810908%09red/gmx:547498%09red/gmx:547963%09red/gmx:100813087%09red/gmx:100793089%09red/gmx:100805001%09red/gmx:100778218%09red/gmx:100801466%09red/gmx:100804938%09red/gmx:3989306%09red/gmx:547756%09red/gmx:100797319%09red/gmx:547755%09red/gmx:100803612%09red/gmx:100781250%09red/gmx:100799793%09red/gmx:547791%09red/gmx:…
Glycolysis / Gluconeogenesis	KEGG PATHWAY	gmx00010	66	253	4.72668e-25	4.89856e-24	Glyma.07G182300.1.p|Glyma.01G173300.1.p|Glyma.18G193600.1.p|Glyma.20G114500.2.p|Glyma.14G010900.1.p|Glyma.10G065000.1.p|Glyma.07G142700.1.p|Glyma.02G026800.1.p|Glyma.15G038100.1.p|Glyma.12G037400.1.p|Glyma.02G202500.1.p|Glyma.07G102900.1.p|Glyma.07G232900.1.p|Glyma.01G024800.1.p|Glyma.19G186000.1.p|Glyma.05G000700.2.p|Glyma.13G098500.1.p|Glyma.15G178400.1.p|Glyma.10G059500.1.p|Glyma.17G091000.1.p…	http://www.genome.jp/kegg-bin/show_pathway?gmx00010/gmx:100800280%09red/gmx:100819824%09red/gmx:100782857%09red/gmx:100780041%09red/gmx:100813087%09red/gmx:100780166%09red/gmx:100805001%09red/gmx:100778218%09red/gmx:547752%09red/gmx:100801466%09red/gmx:100794084%09red/gmx:100791285%09red/gmx:100781250%09red/gmx:100499743%09red/gmx:100776238%09red/gmx:547514%09red/gmx:100809452%09red/gmx:100811084…
Citrate cycle (TCA cycle)	KEGG PATHWAY	gmx00020	38	104	4.55702e-19	4.32917e-18	Glyma.10G039000.1.p|Glyma.10G006500.1.p|Glyma.02G026800.1.p|Glyma.17G037900.1.p|Glyma.07G232900.1.p|Glyma.01G028900.1.p|Glyma.12G159300.1.p|Glyma.05G026300.1.p|Glyma.15G143100.1.p|Glyma.09G035600.2.p|Glyma.06G305700.1.p|Glyma.02G094300.1.p|Glyma.14G186900.2.p|Glyma.02G241200.1.p|Glyma.20G176300.1.p|Glyma.11G084000.1.p|Glyma.10G215400.1.p|Glyma.08G157700.1.p|Glyma.09G164900.1.p|Glyma.16G004400.1.p…	http://www.genome.jp/kegg-bin/show_pathway?gmx00020/gmx:100800280%09red/gmx:100527938%09red/gmx:100793264%09red/gmx:547963%09red/gmx:100813087%09red/gmx:100805001%09red/gmx:100778218%09red/gmx:100803176%09red/gmx:100804938%09red/gmx:100786103%09red/gmx:100781250%09red/gmx:100781418%09red/gmx:100812287%09red/gmx:100799793%09red/gmx:100790952%09red/gmx:100778831%09red/gmx:100798407%09red/gmx:100811…
Glutathione metabolism	KEGG PATHWAY	gmx00480	43	158	2.10607e-17	1.84686e-16	Glyma.19G077300.1.p|Glyma.06G114400.1.p|Glyma.13G135600.1.p|Glyma.19G077800.1.p|Glyma.08G014300.1.p|Glyma.05G240100.1.p|Glyma.14G177200.1.p|Glyma.17G073800.1.p|Glyma.04G248300.1.p|Glyma.08G013800.1.p|Glyma.08G020500.1.p|Glyma.19G154100.2.p|Glyma.18G137100.1.p|Glyma.15G251600.1.p|Glyma.12G032300.1.p|Glyma.10G047700.1.p|Glyma.08G254500.1.p|Glyma.16G155700.1.p|Glyma.05G209200.1.p|Glyma.17G223900.1.p…	http://www.genome.jp/kegg-bin/show_pathway?gmx00480/gmx:100810846%09red/gmx:100784258%09red/gmx:100306295%09red/gmx:547597%09red/gmx:100799034%09red/gmx:100793025%09red/gmx:100792735%09red/gmx:100786103%09red/gmx:100775476%09red/gmx:100792107%09red/gmx:100802238%09red/gmx:553156%09red/gmx:100808523%09red/gmx:547579%09red/gmx:100803548%09red/gmx:100776863%09red/gmx:100799504%09red/gmx:100306136%09…
2-Oxocarboxylic acid metabolism	KEGG PATHWAY	gmx01210	33	94	2.44562e-16	1.99144e-15	Glyma.17G216000.2.p|Glyma.11G084000.1.p|Glyma.10G058100.1.p|Glyma.12G122900.1.p|Glyma.15G072500.1.p|Glyma.02G038100.2.p|Glyma.01G026700.1.p|Glyma.20G009400.1.p|Glyma.02G241200.1.p|Glyma.06G082400.1.p|Glyma.13G131900.1.p|Glyma.06G275700.1.p|Glyma.14G111800.1.p|Glyma.08G157700.1.p|Glyma.13G291300.1.p|Glyma.11G045300.1.p|Glyma.17G256100.1.p|Glyma.06G074900.1.p|Glyma.04G073800.1.p|Glyma.05G167700.1.p…	http://www.genome.jp/kegg-bin/show_pathway?gmx01210/gmx:100793264%09red/gmx:100786103%09red/gmx:100793061%09red/gmx:100811326%09red/gmx:100127415%09red/gmx:100801527%09red/gmx:100782688%09red/gmx:547792%09red/gmx:100780547%09red/gmx:100811514%09red/gmx:100798328%09red/gmx:100806689%09red/gmx:100778831%09red/gmx:100781418%09red/gmx:100814183%09red/gmx:100779210%09red/gmx:100810468%09red/gmx:100783…
Pentose phosphate pathway	KEGG PATHWAY	gmx00030	35	114	9.21718e-16	6.63431e-15	Glyma.07G182300.1.p|Glyma.19G077300.1.p|Glyma.18G193600.1.p|Glyma.14G010900.1.p|Glyma.05G056400.1.p|Glyma.07G142700.1.p|Glyma.04G231600.1.p|Glyma.02G202500.1.p|Glyma.15G136200.1.p|Glyma.17G101700.2.p|Glyma.08G020500.1.p|Glyma.10G293500.1.p|Glyma.19G088400.1.p|Glyma.08G044100.1.p|Glyma.20G243500.1.p|Glyma.08G254500.1.p|Glyma.03G027500.1.p|Glyma.07G126400.1.p|Glyma.04G092400.1.p|Glyma.10G241000.1.p…	http://www.genome.jp/kegg-bin/show_pathway?gmx00030/gmx:100782857%09red/gmx:100780041%09red/gmx:100527532%09red/gmx:100780166%09red/gmx:100818028%09red/gmx:100792666%09red/gmx:100791285%09red/gmx:100805786%09red/gmx:100789900%09red/gmx:100809452%09red/gmx:100799034%09red/gmx:100798677%09red/gmx:100789100%09red/gmx:100794539%09red/gmx:100796103%09red/gmx:100799873%09red/gmx:100783936%09red/gmx:100…
Spliceosome	KEGG PATHWAY	gmx03040	57	311	9.31131e-16	6.63431e-15	Glyma.08G245200.1.p|Glyma.10G123200.1.p|Glyma.09G001000.1.p|Glyma.05G117600.1.p|Glyma.18G266500.1.p|Glyma.11G237500.3.p|Glyma.19G195100.1.p|Glyma.01G227300.1.p|Glyma.15G005900.1.p|Glyma.04G236800.1.p|Glyma.02G288900.1.p|Glyma.03G143400.1.p|Glyma.12G064000.1.p|Glyma.02G155300.1.p|Glyma.13G167800.1.p|Glyma.14G188200.1.p|Glyma.20G113200.1.p|Glyma.17G078400.1.p|Glyma.14G136700.1.p|Glyma.03G253300.1.p…	http://www.genome.jp/kegg-bin/show_pathway?gmx03040/gmx:100816245%09red/gmx:100804021%09red/gmx:100777152%09red/gmx:100818300%09red/gmx:100819928%09red/gmx:100777767%09red/gmx:100527187%09red/gmx:100812698%09red/gmx:100783362%09red/gmx:100786807%09red/gmx:100778595%09red/gmx:100791039%09red/gmx:100815224%09red/gmx:100797765%09red/gmx:100809519%09red/gmx:100817317%09red/gmx:100527424%09red/gmx:100…
Glycine, serine and threonine metabolism	KEGG PATHWAY	gmx00260	36	123	1.24849e-15	8.3722e-15	Glyma.15G012500.1.p|Glyma.20G129400.1.p|Glyma.07G232900.1.p|Glyma.02G038100.2.p|Glyma.08G302600.1.p|Glyma.01G026700.1.p|Glyma.15G178400.1.p|Glyma.05G033500.1.p|Glyma.20G019600.1.p|Glyma.18G116900.1.p|Glyma.05G151100.1.p|Glyma.12G085900.1.p|Glyma.14G094700.1.p|Glyma.05G240700.1.p|Glyma.10G281400.1.p|Glyma.07G262100.2.p|Glyma.17G012000.1.p|Glyma.08G282800.1.p|Glyma.20G107800.1.p|Glyma.13G347100.1.p…	http://www.genome.jp/kegg-bin/show_pathway?gmx00260/gmx:100779623%09red/gmx:100809241%09red/gmx:100803176%09red/gmx:100794084%09red/gmx:100783091%09red/gmx:100812952%09red/gmx:100127415%09red/gmx:548099%09red/gmx:100813292%09red/gmx:100811186%09red/gmx:100812202%09red/gmx:547640%09red/gmx:100820573%09red/gmx:100499635%09red/gmx:100787173%09red/gmx:100778188%09red/gmx:100779355%09red/gmx:100305380…
Photosynthesis - antenna proteins	KEGG PATHWAY	gmx00196	21	34	1.28904e-14	8.16392e-14	Glyma.16G165200.1.p|Glyma.04G167900.1.p|Glyma.03G060300.1.p|Glyma.01G115900.1.p|Glyma.20G212900.1.p|Glyma.02G305400.1.p|Glyma.02G064700.1.p|Glyma.11G228800.1.p|Glyma.08G180000.1.p|Glyma.06G194900.1.p|Glyma.16G205200.1.p|Glyma.08G082900.1.p|Glyma.12G219300.1.p|Glyma.08G074000.1.p|Glyma.15G052400.2.p|Glyma.06G039700.1.p|Glyma.05G128000.1.p|Glyma.16G165800.1.p|Glyma.02G309500.1.p|Glyma.15G179400.1.p…	http://www.genome.jp/kegg-bin/show_pathway?gmx00196/gmx:547819%09red/gmx:100820335%09red/gmx:100817348%09red/gmx:100779387%09red/gmx:100793702%09red/gmx:100802922%09red/gmx:100800350%09red/gmx:100800351%09red/gmx:100783223%09red/gmx:100500118%09red/gmx:100805310%09red/gmx:100785415%09red/gmx:100812066%09red/gmx:100785180%09red/gmx:100798548%09red/gmx:100794604%09red/gmx:100789786%09red/gmx:100804…
RNA transport	KEGG PATHWAY	gmx03013	49	272	1.65207e-13	9.91244e-13	Glyma.02G236700.1.p|Glyma.11G237500.3.p|Glyma.05G003400.1.p|Glyma.01G074700.1.p|Glyma.11G227900.1.p|Glyma.01G227300.1.p|Glyma.08G025600.1.p|Glyma.02G205500.1.p|Glyma.01G029600.1.p|Glyma.08G172000.1.p|Glyma.03G172200.2.p|Glyma.07G060900.1.p|Glyma.10G026700.1.p|Glyma.20G143300.1.p|Glyma.02G103900.1.p|Glyma.15G026100.1.p|Glyma.03G109200.1.p|Glyma.10G250400.1.p|Glyma.02G097300.1.p|Glyma.11G141500.2.p…	http://www.genome.jp/kegg-bin/show_pathway?gmx03013/gmx:100816245%09red/gmx:100783618%09red/gmx:100817394%09red/gmx:100527187%09red/gmx:100791863%09red/gmx:100781275%09red/gmx:100526922%09red/gmx:100783362%09red/gmx:100777906%09red/gmx:100778595%09red/gmx:100777129%09red/gmx:100785429%09red/gmx:100795339%09red/gmx:100789296%09red/gmx:100817317%09red/gmx:100780715%09red/gmx:100775688%09red/gmx:100…
Porphyrin and chlorophyll metabolism	KEGG PATHWAY	gmx00860	27	85	8.74991e-13	4.98745e-12	Glyma.11G016000.1.p|Glyma.04G002900.1.p|Glyma.12G021100.1.p|Glyma.14G003200.1.p|Glyma.12G222200.1.p|Glyma.08G007900.1.p|Glyma.03G097900.1.p|Glyma.05G200500.3.p|Glyma.02G218300.1.p|Glyma.04G247700.1.p|Glyma.15G097700.1.p|Glyma.02G301700.1.p|Glyma.18G021500.1.p|Glyma.10G138600.1.p|Glyma.01G227400.1.p|Glyma.13G215400.1.p|Glyma.12G229700.1.p|Glyma.13G232500.1.p|Glyma.19G123800.1.p|Glyma.06G221900.3.p…	http://www.genome.jp/kegg-bin/show_pathway?gmx00860/gmx:100817154%09red/gmx:547612%09red/gmx:100784256%09red/gmx:100810730%09red/gmx:100817017%09red/gmx:100803481%09red/gmx:100816614%09red/gmx:100800753%09red/gmx:100810190%09red/gmx:100785637%09red/gmx:547795%09red/gmx:100779132%09red/gmx:548043%09red/gmx:100780934%09red/gmx:100812733%09red/gmx:100819951%09red/gmx:100808086%09red/gmx:100812162%09…
Protein processing in endoplasmic reticulum	KEGG PATHWAY	gmx04141	56	375	2.91958e-12	1.58492e-11	Glyma.10G014700.1.p|Glyma.11G084700.2.p|Glyma.12G172800.1.p|Glyma.06G114800.1.p|Glyma.02G266900.1.p|Glyma.10G147600.2.p|Glyma.12G010300.2.p|Glyma.01G068000.1.p|Glyma.04G202900.1.p|Glyma.12G177100.1.p|Glyma.02G014000.3.p|Glyma.20G098400.1.p|Glyma.01G081500.1.p|Glyma.19G183400.1.p|Glyma.02G270000.1.p|Glyma.04G199200.2.p|Glyma.13G328300.1.p|Glyma.09G007600.1.p|Glyma.01G159500.1.p|Glyma.12G024500.1.p…	http://www.genome.jp/kegg-bin/show_pathway?gmx04141/gmx:100810637%09red/gmx:100785017%09red/gmx:100820543%09red/gmx:100815670%09red/gmx:100526845%09red/gmx:100777767%09red/gmx:100785901%09red/gmx:100814162%09red/gmx:100499727%09red/gmx:100790223%09red/gmx:100802236%09red/gmx:100499741%09red/gmx:100814141%09red/gmx:100779976%09red/gmx:100811253%09red/gmx:547558%09red/gmx:100527683%09red/gmx:100810…
Alanine, aspartate and glutamate metabolism	KEGG PATHWAY	gmx00250	27	95	7.64976e-12	3.96397e-11	Glyma.14G195000.1.p|Glyma.17G216000.2.p|Glyma.02G038100.2.p|Glyma.08G302600.1.p|Glyma.01G026700.1.p|Glyma.04G236900.1.p|Glyma.11G171400.1.p|Glyma.18G116900.1.p|Glyma.16G218500.1.p|Glyma.06G150000.1.p|Glyma.11G096200.1.p|Glyma.15G045100.1.p|Glyma.06G275700.1.p|Glyma.14G111800.1.p|Glyma.04G216000.1.p|Glyma.11G215500.1.p|Glyma.13G328600.1.p|Glyma.02G228100.1.p|Glyma.06G096700.1.p|Glyma.06G082400.1.p…	http://www.genome.jp/kegg-bin/show_pathway?gmx00250/gmx:100815931%09red/gmx:100792329%09red/gmx:100788470%09red/gmx:100127415%09red/gmx:100817195%09red/gmx:547792%09red/gmx:100811514%09red/gmx:100780873%09red/gmx:547894%09red/gmx:547953%09red/gmx:100808318%09red/gmx:547724%09red/gmx:547813%09red/gmx:547620%09red/gmx:547509%09red/gmx:100797022%09red/gmx:732565%09red/gmx:100806168%09red/gmx:1007871…
Fructose and mannose metabolism	KEGG PATHWAY	gmx00051	31	129	9.10643e-12	4.51362e-11	Glyma.07G182300.1.p|Glyma.02G228700.1.p|Glyma.18G193600.1.p|Glyma.14G010900.1.p|Glyma.07G142700.1.p|Glyma.12G036700.1.p|Glyma.12G037400.1.p|Glyma.19G186000.1.p|Glyma.02G303000.1.p|Glyma.02G245800.1.p|Glyma.16G199200.1.p|Glyma.01G024800.1.p|Glyma.11G169700.1.p|Glyma.07G126400.1.p|Glyma.11G127200.1.p|Glyma.13G336200.1.p|Glyma.18G229800.1.p|Glyma.01G167500.1.p|Glyma.03G185800.1.p|Glyma.10G059500.1.p…	http://www.genome.jp/kegg-bin/show_pathway?gmx00051/gmx:100819824%09red/gmx:100782857%09red/gmx:100527532%09red/gmx:100804624%09red/gmx:100777692%09red/gmx:100820630%09red/gmx:100806500%09red/gmx:732605%09red/gmx:100780082%09red/gmx:100798990%09red/gmx:100799358%09red/gmx:100798677%09red/gmx:100794539%09red/gmx:100799873%09red/gmx:100793356%09red/gmx:100807451%09red/gmx:100787923%09red/gmx:100775…
Cysteine and methionine metabolism	KEGG PATHWAY	gmx00270	38	195	1.1008e-11	5.2288e-11	Glyma.10G006500.1.p|Glyma.10G244300.1.p|Glyma.02G138400.1.p|Glyma.09G235400.1.p|Glyma.17G216000.2.p|Glyma.12G159300.1.p|Glyma.05G026300.1.p|Glyma.16G038300.1.p|Glyma.10G159800.5.p|Glyma.18G137100.1.p|Glyma.06G082400.1.p|Glyma.05G151100.1.p|Glyma.12G225300.1.p|Glyma.05G240700.1.p|Glyma.03G244800.2.p|Glyma.06G275700.1.p|Glyma.14G111800.1.p|Glyma.10G244100.1.p|Glyma.08G167100.1.p|Glyma.11G045300.1.p…	http://www.genome.jp/kegg-bin/show_pathway?gmx00270/gmx:100814810%09red/gmx:100812492%09red/gmx:100792107%09red/gmx:547963%09red/gmx:100787994%09red/gmx:100793061%09red/gmx:100820392%09red/gmx:100806420%09red/gmx:547792%09red/gmx:100811514%09red/gmx:100798328%09red/gmx:100811211%09red/gmx:100500592%09red/gmx:548023%09red/gmx:100796209%09red/gmx:100803035%09red/gmx:100812202%09red/gmx:547631%09red…
Arginine biosynthesis	KEGG PATHWAY	gmx00220	21	59	5.13118e-11	2.32635e-10	Glyma.09G173200.1.p|Glyma.07G118300.1.p|Glyma.07G179700.1.p|Glyma.13G131900.1.p|Glyma.06G082400.1.p|Glyma.06G074900.1.p|Glyma.13G210800.2.p|Glyma.06G096700.1.p|Glyma.17G216000.2.p|Glyma.06G275700.1.p|Glyma.04G030500.1.p|Glyma.14G111800.1.p|Glyma.03G028000.1.p|Glyma.04G073800.1.p|Glyma.15G102000.2.p|Glyma.02G038100.2.p|Glyma.20G000500.1.p|Glyma.11G215500.1.p|Glyma.01G026700.1.p|Glyma.01G140200.1.p…	http://www.genome.jp/kegg-bin/show_pathway?gmx00220/gmx:100127415%09red/gmx:100787173%09red/gmx:100788347%09red/gmx:547792%09red/gmx:100811514%09red/gmx:100780873%09red/gmx:547813%09red/gmx:100780093%09red/gmx:100780483%09red/gmx:100814183%09red/gmx:100797501%09red/gmx:547994%09red/gmx:100775828%09red/gmx:547620%09red/gmx:547509%09red/gmx:100783172%09red/gmx:100801527%09red/gmx:547953%09red/gmx:1…
Proteasome	KEGG PATHWAY	gmx03050	27	105	5.30571e-11	2.32635e-10	Glyma.05G079000.2.p|Glyma.03G073300.2.p|Glyma.17G127100.1.p|Glyma.14G014800.5.p|Glyma.05G241500.1.p|Glyma.16G126200.1.p|Glyma.18G206200.1.p|Glyma.02G013600.1.p|Glyma.16G126300.1.p|Glyma.03G262800.1.p|Glyma.10G295600.1.p|Glyma.14G081600.1.p|Glyma.14G073000.1.p|Glyma.10G151900.1.p|Glyma.03G170600.1.p|Glyma.04G194700.3.p|Glyma.04G077400.1.p|Glyma.08G167600.1.p|Glyma.18G138900.1.p|Glyma.11G078100.1.p…	http://www.genome.jp/kegg-bin/show_pathway?gmx03050/gmx:100793551%09red/gmx:100778498%09red/gmx:547598%09red/gmx:100803975%09red/gmx:100792921%09red/gmx:100790425%09red/gmx:100808133%09red/gmx:100790393%09red/gmx:100794489%09red/gmx:100817941%09red/gmx:100788486%09red/gmx:100798835%09red/gmx:100799919%09red/gmx:100790481%09red/gmx:100306148%09red/gmx:100803124%09red/gmx:100812783%09red/gmx:100499…
Fatty acid biosynthesis	KEGG PATHWAY	gmx00061	21	79	4.29901e-09	1.81514e-08	Glyma.18G243500.1.p|Glyma.05G221100.1.p|Glyma.11G101400.1.p|Glyma.13G112700.2.p|Glyma.15G052500.1.p|Glyma.18G195900.1.p|Glyma.08G349200.1.p|Glyma.18G057700.1.p|Glyma.20G143900.1.p|Glyma.07G207200.1.p|Glyma.09G277400.1.p|Glyma.01G225200.1.p|Glyma.18G009200.1.p|Glyma.12G027300.1.p|Glyma.15G248500.1.p|Glyma.09G248900.1.p|Glyma.05G129600.1.p|Glyma.18G196000.1.p|Glyma.08G084300.1.p|Glyma.16G042000.1.p…	http://www.genome.jp/kegg-bin/show_pathway?gmx00061/gmx:547575%09red/gmx:100217331%09red/gmx:548028%09red/gmx:100809809%09red/gmx:100795986%09red/gmx:100817945%09red/gmx:100809416%09red/gmx:100814965%09red/gmx:100806814%09red/gmx:548072%09red/gmx:100813007%09red/gmx:732644%09red/gmx:3989306%09red/gmx:100301904%09red/gmx:100785606%09red/gmx:100037453%09red/gmx:100777266%09red/gmx:100037462%09red/g…
Ascorbate and aldarate metabolism	KEGG PATHWAY	gmx00053	20	74	7.86206e-09	3.20098e-08	Glyma.10G067500.1.p|Glyma.15G115500.1.p|Glyma.06G114400.1.p|Glyma.17G091000.1.p|Glyma.12G032300.1.p|Glyma.08G064100.1.p|Glyma.06G183900.1.p|Glyma.06G068200.1.p|Glyma.08G017800.1.p|Glyma.11G209100.1.p|Glyma.02G209000.1.p|Glyma.10G162000.1.p|Glyma.14G177200.1.p|Glyma.08G002700.1.p|Glyma.12G073100.1.p|Glyma.04G009800.1.p|Glyma.04G248300.1.p|Glyma.03G247000.1.p|Glyma.15G178400.1.p|Glyma.U021900.1.p	http://www.genome.jp/kegg-bin/show_pathway?gmx00053/gmx:100811501%09red/gmx:100500084%09red/gmx:100784258%09red/gmx:100794772%09red/gmx:100799504%09red/gmx:100817591%09red/gmx:100819919%09red/gmx:100809400%09red/gmx:100792735%09red/gmx:100170727%09red/gmx:100800699%09red/gmx:606508%09red/gmx:100802238%09red/gmx:100795192%09red/gmx:100811186%09red/gmx:100527811%09red/gmx:100780764%09red/gmx:553156…
Sulfur metabolism	KEGG PATHWAY	gmx00920	18	63	2.11657e-08	8.28975e-08	Glyma.19G071800.1.p|Glyma.09G246700.1.p|Glyma.15G108700.1.p|Glyma.11G014100.1.p|Glyma.12G019400.1.p|Glyma.13G261400.1.p|Glyma.02G138400.1.p|Glyma.09G235400.1.p|Glyma.09G004400.1.p|Glyma.03G244800.2.p|Glyma.08G167100.1.p|Glyma.09G258000.1.p|Glyma.10G242600.1.p|Glyma.13G051000.1.p|Glyma.10G159800.5.p|Glyma.11G005800.3.p|Glyma.08G086800.1.p|Glyma.11G093200.1.p	http://www.genome.jp/kegg-bin/show_pathway?gmx00920/gmx:547693%09red/gmx:100101865%09red/gmx:100806420%09red/gmx:100790764%09red/gmx:100798053%09red/gmx:100499929%09red/gmx:100817415%09red/gmx:100780846%09red/gmx:100805275%09red/gmx:100799978%09red/gmx:100815330%09red/gmx:547631%09red/gmx:547630%09red/gmx:548023%09red/gmx:100817799%09red/gmx:100787558%09red/gmx:100775420%09red/gmx:547634%09red
Phagosome	KEGG PATHWAY	gmx04145	29	165	2.18151e-08	8.28975e-08	Glyma.05G214200.1.p|Glyma.03G180700.1.p|Glyma.10G052700.1.p|Glyma.14G219300.1.p|Glyma.16G050200.1.p|Glyma.20G098400.1.p|Glyma.09G245700.1.p|Glyma.16G142600.1.p|Glyma.16G146600.1.p|Glyma.07G023400.1.p|Glyma.08G020300.1.p|Glyma.05G207500.1.p|Glyma.08G006500.1.p|Glyma.19G101000.1.p|Glyma.19G113000.1.p|Glyma.05G110200.1.p|Glyma.18G256200.1.p|Glyma.01G109300.1.p|Glyma.08G115100.1.p|Glyma.05G135300.2.p…	http://www.genome.jp/kegg-bin/show_pathway?gmx04145/gmx:100781043%09red/gmx:100788253%09red/gmx:100798849%09red/gmx:100810595%09red/gmx:100816898%09red/gmx:100775727%09red/gmx:100785901%09red/gmx:100802236%09red/gmx:100800553%09red/gmx:100780187%09red/gmx:100813963%09red/gmx:100811997%09red/gmx:100305531%09red/gmx:100814088%09red/gmx:547851%09red/gmx:100305477%09red/gmx:100803728%09red/gmx:732582…
Propanoate metabolism	KEGG PATHWAY	gmx00640	17	56	2.46492e-08	9.06454e-08	Glyma.15G143100.1.p|Glyma.10G039000.1.p|Glyma.08G066600.2.p|Glyma.13G125400.1.p|Glyma.18G195900.1.p|Glyma.14G004600.1.p|Glyma.05G221100.1.p|Glyma.17G140600.2.p|Glyma.18G243500.1.p|Glyma.16G213200.1.p|Glyma.07G232900.1.p|Glyma.15G248500.1.p|Glyma.09G248900.1.p|Glyma.09G164900.1.p|Glyma.18G196000.1.p|Glyma.16G080900.1.p|Glyma.17G037900.1.p	http://www.genome.jp/kegg-bin/show_pathway?gmx00640/gmx:100527938%09red/gmx:100782001%09red/gmx:547498%09red/gmx:547523%09red/gmx:100776777%09red/gmx:100811544%09red/gmx:100788043%09red/gmx:548072%09red/gmx:100803176%09red/gmx:100790952%09red/gmx:3989306%09red/gmx:100170729%09red/gmx:100803035%09red/gmx:100815484%09red/gmx:100037462%09red/gmx:100037449%09red/gmx:100778244%09red
Fatty acid metabolism	KEGG PATHWAY	gmx01212	24	124	7.22888e-08	2.57529e-07	Glyma.11G101400.1.p|Glyma.18G195900.1.p|Glyma.15G248500.1.p|Glyma.11G035200.1.p|Glyma.20G143900.1.p|Glyma.07G207200.1.p|Glyma.18G243500.1.p|Glyma.01G225200.1.p|Glyma.18G009200.1.p|Glyma.12G027300.1.p|Glyma.05G129600.1.p|Glyma.18G196000.1.p|Glyma.08G084300.1.p|Glyma.10G124700.1.p|Glyma.05G221100.1.p|Glyma.14G004600.1.p|Glyma.18G057700.1.p|Glyma.13G112700.2.p|Glyma.07G246300.1.p|Glyma.09G277400.1.p…	http://www.genome.jp/kegg-bin/show_pathway?gmx01212/gmx:100217331%09red/gmx:547498%09red/gmx:100814965%09red/gmx:100806814%09red/gmx:3989306%09red/gmx:732644%09red/gmx:548028%09red/gmx:100809416%09red/gmx:100817945%09red/gmx:547575%09red/gmx:100777319%09red/gmx:100037462%09red/gmx:100037449%09red/gmx:100778244%09red/gmx:100776777%09red/gmx:100809809%09red/gmx:547625%09red/gmx:100785606%09red/gmx:…
Phenylalanine, tyrosine and tryptophan biosynthesis	KEGG PATHWAY	gmx00400	18	71	9.90929e-08	3.42321e-07	Glyma.05G181000.1.p|Glyma.20G179500.1.p|Glyma.19G160800.1.p|Glyma.19G027100.1.p|Glyma.01G082200.1.p|Glyma.10G211400.1.p|Glyma.06G082400.1.p|Glyma.17G216000.2.p|Glyma.02G073000.1.p|Glyma.06G275700.1.p|Glyma.11G078700.1.p|Glyma.08G312300.1.p|Glyma.14G111800.1.p|Glyma.04G184900.1.p|Glyma.20G103200.1.p|Glyma.01G164300.1.p|Glyma.17G222700.1.p|Glyma.15G054700.1.p	http://www.genome.jp/kegg-bin/show_pathway?gmx00400/gmx:732610%09red/gmx:547792%09red/gmx:100783691%09red/gmx:100811514%09red/gmx:100793028%09red/gmx:100806628%09red/gmx:100814518%09red/gmx:100811217%09red/gmx:100801361%09red/gmx:100789764%09red/gmx:100808361%09red/gmx:547813%09red/gmx:100792812%09red/gmx:547509%09red/gmx:732570%09red/gmx:100794615%09red/gmx:100812989%09red/gmx:100526928%09red
Aminoacyl-tRNA biosynthesis	KEGG PATHWAY	gmx00970	25	140	1.52169e-07	5.10212e-07	Glyma.12G043200.1.p|Glyma.08G311400.1.p|Glyma.03G183400.1.p|Glyma.11G102100.1.p|Glyma.11G065500.1.p|Glyma.10G214200.3.p|Glyma.04G086500.1.p|Glyma.01G006100.1.p|Glyma.03G097900.1.p|Glyma.18G291800.1.p|Glyma.17G026600.1.p|Glyma.16G179800.1.p|Glyma.05G236700.1.p|Glyma.10G155000.1.p|Glyma.01G032500.1.p|Glyma.08G031100.1.p|Glyma.08G363700.1.p|Glyma.06G001100.1.p|Glyma.02G234500.1.p|Glyma.03G109000.1.p…	http://www.genome.jp/kegg-bin/show_pathway?gmx00970/gmx:100793186%09red/gmx:100810476%09red/gmx:100810730%09red/gmx:100813162%09red/gmx:100809150%09red/gmx:100776622%09red/gmx:100777060%09red/gmx:100781232%09red/gmx:100804064%09red/gmx:100801732%09red/gmx:100812652%09red/gmx:100796303%09red/gmx:100812345%09red/gmx:100813016%09red/gmx:100817906%09red/gmx:100777795%09red/gmx:100788013%09red/gmx:100…
Peroxisome	KEGG PATHWAY	gmx04146	25	150	4.78142e-07	1.55738e-06	Glyma.19G240400.1.p|Glyma.08G175800.1.p|Glyma.04G221300.1.p|Glyma.10G193500.1.p|Glyma.13G280600.1.p|Glyma.16G153900.1.p|Glyma.08G302600.1.p|Glyma.03G242900.2.p|Glyma.02G241200.1.p|Glyma.06G144500.1.p|Glyma.02G087700.1.p|Glyma.20G143900.1.p|Glyma.11G035200.1.p|Glyma.01G225200.1.p|Glyma.15G250800.1.p|Glyma.17G141800.1.p|Glyma.04G017500.1.p|Glyma.10G124700.1.p|Glyma.06G017900.1.p|Glyma.19G128600.3.p…	http://www.genome.jp/kegg-bin/show_pathway?gmx04146/gmx:100814965%09red/gmx:100786103%09red/gmx:547511%09red/gmx:100499991%09red/gmx:100786706%09red/gmx:100780008%09red/gmx:547531%09red/gmx:100170726%09red/gmx:100500051%09red/gmx:100305732%09red/gmx:100037448%09red/gmx:100814802%09red/gmx:100527058%09red/gmx:547625%09red/gmx:100777153%09red/gmx:732565%09red/gmx:100815376%09red/gmx:100786361%09red…
Nitrogen metabolism	KEGG PATHWAY	gmx00910	16	64	5.89448e-07	1.86659e-06	Glyma.07G212800.2.p|Glyma.02G035000.1.p|Glyma.01G030500.1.p|Glyma.03G128300.2.p|Glyma.13G210800.2.p|Glyma.10G005200.1.p|Glyma.14G164900.1.p|Glyma.05G007100.1.p|Glyma.10G073400.1.p|Glyma.02G132100.1.p|Glyma.15G102000.2.p|Glyma.11G215500.1.p|Glyma.09G173200.1.p|Glyma.04G236900.1.p|Glyma.18G138400.1.p|Glyma.19G007700.1.p	http://www.genome.jp/kegg-bin/show_pathway?gmx00910/gmx:100808326%09red/gmx:100781868%09red/gmx:548016%09red/gmx:100810496%09red/gmx:100780873%09red/gmx:100815931%09red/gmx:100775519%09red/gmx:547620%09red/gmx:100797401%09red/gmx:100803945%09red/gmx:100305967%09red/gmx:100818103%09red/gmx:732631%09red/gmx:547953%09red
One carbon pool by folate	KEGG PATHWAY	gmx00670	11	36	6.83997e-06	2.10152e-05	Glyma.06G325300.1.p|Glyma.18G150000.1.p|Glyma.17G012000.1.p|Glyma.16G164900.5.p|Glyma.08G108900.2.p|Glyma.13G222300.1.p|Glyma.10G293800.1.p|Glyma.07G262100.2.p|Glyma.08G274400.1.p|Glyma.20G243700.1.p|Glyma.14G184500.1.p	http://www.genome.jp/kegg-bin/show_pathway?gmx00670/gmx:100797489%09red/gmx:100499635%09red/gmx:100778188%09red/gmx:100305381%09red/gmx:100305380%09red/gmx:100782213%09red/gmx:100812952%09red/gmx:100809241%09red/gmx:100797707%09red/gmx:100806844%09red
Lysine biosynthesis	KEGG PATHWAY	gmx00300	9	22	7.00506e-06	2.10152e-05	Glyma.19G174300.1.p|Glyma.05G151100.1.p|Glyma.08G047800.1.p|Glyma.03G181200.1.p|Glyma.05G240700.1.p|Glyma.09G268200.1.p|Glyma.16G028900.1.p|Glyma.03G173400.1.p|Glyma.15G178400.1.p	http://www.genome.jp/kegg-bin/show_pathway?gmx00300/gmx:100814757%09red/gmx:100807997%09red/gmx:100786832%09red/gmx:100784731%09red/gmx:100793061%09red/gmx:100788930%09red/gmx:100807528%09red/gmx:100811186%09red/gmx:100812202%09red
Amino sugar and nucleotide sugar metabolism	KEGG PATHWAY	gmx00520	32	266	8.11539e-06	2.36536e-05	Glyma.02G241100.1.p|Glyma.02G304500.2.p|Glyma.19G124500.1.p|Glyma.11G127200.1.p|Glyma.14G210700.1.p|Glyma.13G152500.1.p|Glyma.12G064600.3.p|Glyma.08G180900.1.p|Glyma.02G245800.1.p|Glyma.18G286200.1.p|Glyma.08G044100.1.p|Glyma.12G180300.1.p|Glyma.10G162000.1.p|Glyma.01G063000.1.p|Glyma.04G092400.1.p|Glyma.17G132500.1.p|Glyma.05G008100.1.p|Glyma.10G241000.1.p|Glyma.02G120900.1.p|Glyma.01G167500.1.p…	http://www.genome.jp/kegg-bin/show_pathway?gmx00520/gmx:100783948%09red/gmx:100782830%09red/gmx:100780166%09red/gmx:100792948%09red/gmx:100775641%09red/gmx:100791285%09red/gmx:100777692%09red/gmx:100794066%09red/gmx:100809452%09red/gmx:100809983%09red/gmx:100790112%09red/gmx:732605%09red/gmx:100780082%09red/gmx:100781643%09red/gmx:100793356%09red/gmx:100788017%09red/gmx:100816315%09red/gmx:100790…
Butanoate metabolism	KEGG PATHWAY	gmx00650	11	37	8.50698e-06	2.36536e-05	Glyma.16G218500.1.p|Glyma.18G043600.1.p|Glyma.13G349100.1.p|Glyma.16G028700.1.p|Glyma.14G004600.1.p|Glyma.11G096200.1.p|Glyma.19G128600.3.p|Glyma.05G167700.1.p|Glyma.07G059800.1.p|Glyma.15G072500.1.p|Glyma.15G263500.1.p	http://www.genome.jp/kegg-bin/show_pathway?gmx00650/gmx:100779210%09red/gmx:100781928%09red/gmx:100783047%09red/gmx:100783934%09red/gmx:100776777%09red/gmx:100808318%09red/gmx:100815181%09red/gmx:547724%09red/gmx:100802847%09red/gmx:100817216%09red/gmx:100801507%09red
Valine, leucine and isoleucine biosynthesis	KEGG PATHWAY	gmx00290	11	37	8.50698e-06	2.36536e-05	Glyma.11G045300.1.p|Glyma.13G207900.1.p|Glyma.15G005400.1.p|Glyma.17G256100.1.p|Glyma.07G032200.1.p|Glyma.12G122900.1.p|Glyma.05G167700.1.p|Glyma.13G291300.1.p|Glyma.15G072500.1.p|Glyma.11G079000.1.p|Glyma.08G210500.1.p	http://www.genome.jp/kegg-bin/show_pathway?gmx00290/gmx:100779210%09red/gmx:100782688%09red/gmx:100780547%09red/gmx:100783934%09red/gmx:100798328%09red/gmx:100806689%09red/gmx:100809737%09red/gmx:100812763%09red/gmx:100789879%09red/gmx:100807689%09red/gmx:100810468%09red
C5-Branched dibasic acid metabolism	KEGG PATHWAY	gmx00660	7	13	1.90994e-05	5.18413e-05	Glyma.05G167700.1.p|Glyma.11G079000.1.p|Glyma.15G005400.1.p|Glyma.17G256100.1.p|Glyma.07G032200.1.p|Glyma.15G072500.1.p|Glyma.08G210500.1.p	http://www.genome.jp/kegg-bin/show_pathway?gmx00660/gmx:100779210%09red/gmx:100782688%09red/gmx:100780547%09red/gmx:100783934%09red/gmx:100809737%09red/gmx:100807689%09red/gmx:100810468%09red
Biotin metabolism	KEGG PATHWAY	gmx00780	9	27	2.65875e-05	7.04877e-05	Glyma.11G101400.1.p|Glyma.13G112700.2.p|Glyma.18G009200.1.p|Glyma.15G052500.1.p|Glyma.12G027300.1.p|Glyma.05G129600.1.p|Glyma.08G084300.1.p|Glyma.16G042000.1.p|Glyma.11G248000.1.p	http://www.genome.jp/kegg-bin/show_pathway?gmx00780/gmx:548028%09red/gmx:100809809%09red/gmx:100817945%09red/gmx:100809416%09red/gmx:100806814%09red/gmx:100037453%09red/gmx:100785606%09red/gmx:547575%09red/gmx:100777266%09red
Monobactam biosynthesis	KEGG PATHWAY	gmx00261	7	15	3.87582e-05	0.000100419	Glyma.05G151100.1.p|Glyma.08G047800.1.p|Glyma.05G240700.1.p|Glyma.09G268200.1.p|Glyma.16G028900.1.p|Glyma.10G242600.1.p|Glyma.13G051000.1.p	http://www.genome.jp/kegg-bin/show_pathway?gmx00261/gmx:100814757%09red/gmx:100807997%09red/gmx:100805275%09red/gmx:100793061%09red/gmx:547634%09red/gmx:100788930%09red/gmx:100812202%09red
Selenocompound metabolism	KEGG PATHWAY	gmx00450	9	31	6.54467e-05	0.000165798	Glyma.11G088200.1.p|Glyma.13G028400.1.p|Glyma.09G235400.1.p|Glyma.10G113100.1.p|Glyma.09G021000.3.p|Glyma.19G114500.2.p|Glyma.10G242600.1.p|Glyma.13G051000.1.p|Glyma.16G038300.1.p	http://www.genome.jp/kegg-bin/show_pathway?gmx00450/gmx:547643%09red/gmx:100799615%09red/gmx:100805275%09red/gmx:100819254%09red/gmx:548023%09red/gmx:100802039%09red/gmx:100790557%09red/gmx:547634%09red/gmx:100779947%09red
Valine, leucine and isoleucine degradation	KEGG PATHWAY	gmx00280	15	93	0.000122607	0.000303853	Glyma.10G124700.1.p|Glyma.17G091000.1.p|Glyma.02G131500.1.p|Glyma.08G066600.2.p|Glyma.11G045300.1.p|Glyma.06G183900.1.p|Glyma.14G004600.1.p|Glyma.16G080900.1.p|Glyma.19G128600.3.p|Glyma.08G002700.1.p|Glyma.17G037900.1.p|Glyma.07G232900.1.p|Glyma.15G143100.1.p|Glyma.15G178400.1.p|Glyma.08G204300.1.p	http://www.genome.jp/kegg-bin/show_pathway?gmx00280/gmx:100811501%09red/gmx:100811186%09red/gmx:547523%09red/gmx:100776777%09red/gmx:100811544%09red/gmx:100798328%09red/gmx:100810130%09red/gmx:100803176%09red/gmx:100800699%09red/gmx:100791763%09red/gmx:100170734%09red/gmx:100801507%09red/gmx:100788043%09red/gmx:100170729%09red
Purine metabolism	KEGG PATHWAY	gmx00230	30	284	0.000133003	0.000322603	Glyma.10G065000.1.p|Glyma.04G045000.1.p|Glyma.10G125100.1.p|Glyma.09G096800.1.p|Glyma.10G184900.1.p|Glyma.05G000700.2.p|Glyma.10G241000.1.p|Glyma.03G088500.1.p|Glyma.09G234300.1.p|Glyma.17G127400.1.p|Glyma.08G044100.1.p|Glyma.17G128300.1.p|Glyma.16G036100.1.p|Glyma.13G240600.1.p|Glyma.13G051000.1.p|Glyma.11G221100.1.p|Glyma.16G043400.1.p|Glyma.20G024800.1.p|Glyma.05G046300.1.p|Glyma.16G043500.1.p…	http://www.genome.jp/kegg-bin/show_pathway?gmx00230/gmx:100811753%09red/gmx:100780166%09red/gmx:100777103%09red/gmx:100792329%09red/gmx:100819741%09red/gmx:100801466%09red/gmx:100782385%09red/gmx:547634%09red/gmx:100797579%09red/gmx:100499661%09red/gmx:100784319%09red/gmx:100790263%09red/gmx:547791%09red/gmx:100801737%09red/gmx:100818830%09red/gmx:100787491%09red/gmx:547870%09red/gmx:100305792%09…
Galactose metabolism	KEGG PATHWAY	gmx00052	16	111	0.000235733	0.000559866	Glyma.12G036700.1.p|Glyma.02G241100.1.p|Glyma.10G194300.1.p|Glyma.05G056300.1.p|Glyma.08G044100.1.p|Glyma.13G152500.1.p|Glyma.14G210700.1.p|Glyma.18G215700.1.p|Glyma.07G126400.1.p|Glyma.09G239800.1.p|Glyma.01G024800.1.p|Glyma.15G133700.1.p|Glyma.07G102900.1.p|Glyma.18G257700.1.p|Glyma.17G138500.1.p|Glyma.10G241000.1.p	http://www.genome.jp/kegg-bin/show_pathway?gmx00052/gmx:100806500%09red/gmx:100781853%09red/gmx:100777498%09red/gmx:100790112%09red/gmx:100798975%09red/gmx:100780166%09red/gmx:100820495%09red/gmx:100802730%09red/gmx:100812330%09red/gmx:100776238%09red/gmx:100794539%09red/gmx:100788844%09red/gmx:100799487%09red/gmx:100794066%09red/gmx:100776597%09red
Terpenoid backbone biosynthesis	KEGG PATHWAY	gmx00900	14	91	0.000314034	0.000730609	Glyma.11G021400.1.p|Glyma.16G089000.1.p|Glyma.17G002400.1.p|Glyma.12G046000.1.p|Glyma.08G093400.1.p|Glyma.09G015600.1.p|Glyma.15G243100.1.p|Glyma.14G004600.1.p|Glyma.11G120900.1.p|Glyma.13G262200.1.p|Glyma.13G072700.1.p|Glyma.05G037500.1.p|Glyma.13G326400.2.p|Glyma.16G141700.1.p	http://www.genome.jp/kegg-bin/show_pathway?gmx00900/gmx:100805316%09red/gmx:100785539%09red/gmx:100776777%09red/gmx:100801743%09red/gmx:100817632%09red/gmx:100788186%09red/gmx:100779074%09red/gmx:100306378%09red/gmx:100805941%09red/gmx:100790607%09red/gmx:100818067%09red/gmx:100802347%09red/gmx:100805842%09red/gmx:100783538%09red
beta-Alanine metabolism	KEGG PATHWAY	gmx00410	14	95	0.000463057	0.00105577	Glyma.17G091000.1.p|Glyma.08G282800.1.p|Glyma.18G137100.1.p|Glyma.16G218500.1.p|Glyma.08G066600.2.p|Glyma.06G183900.1.p|Glyma.15G055500.1.p|Glyma.15G178400.1.p|Glyma.18G043600.1.p|Glyma.07G182100.1.p|Glyma.16G080900.1.p|Glyma.08G002700.1.p|Glyma.02G033900.1.p|Glyma.07G105400.1.p	http://www.genome.jp/kegg-bin/show_pathway?gmx00410/gmx:100811501%09red/gmx:547724%09red/gmx:100792563%09red/gmx:100783047%09red/gmx:100776863%09red/gmx:100818990%09red/gmx:100800699%09red/gmx:100797867%09red/gmx:100783091%09red/gmx:100792107%09red/gmx:100811544%09red/gmx:100811186%09red/gmx:100170729%09red
Tropane, piperidine and pyridine alkaloid biosynthesis	KEGG PATHWAY	gmx00960	9	43	0.000537167	0.00120073	Glyma.05G181000.1.p|Glyma.08G282800.1.p|Glyma.11G221400.1.p|Glyma.06G082400.1.p|Glyma.18G186400.1.p|Glyma.17G216000.2.p|Glyma.06G275700.1.p|Glyma.14G111800.1.p|Glyma.18G186800.1.p	http://www.genome.jp/kegg-bin/show_pathway?gmx00960/gmx:547792%09red/gmx:100811514%09red/gmx:547813%09red/gmx:100306108%09red/gmx:100801361%09red/gmx:100786456%09red/gmx:547509%09red/gmx:100819646%09red/gmx:100783091%09red
Inositol phosphate metabolism	KEGG PATHWAY	gmx00562	15	111	0.000668449	0.00146545	Glyma.04G009800.1.p|Glyma.15G115500.1.p|Glyma.03G185800.1.p|Glyma.18G018600.1.p|Glyma.06G218300.1.p|Glyma.08G066600.2.p|Glyma.19G186000.1.p|Glyma.13G336200.1.p|Glyma.08G138200.2.p|Glyma.20G126600.1.p|Glyma.14G059200.1.p|Glyma.15G038100.1.p|Glyma.05G180600.1.p|Glyma.08G086800.1.p|Glyma.10G059500.1.p	http://www.genome.jp/kegg-bin/show_pathway?gmx00562/gmx:100796770%09red/gmx:100817415%09red/gmx:100819824%09red/gmx:106797152%09red/gmx:100800820%09red/gmx:100817591%09red/gmx:547761%09red/gmx:100799358%09red/gmx:100819908%09red/gmx:100799214%09red/gmx:100796274%09red/gmx:100811544%09red/gmx:100798459%09red/gmx:547864%09red/gmx:100527811%09red
Linoleic acid metabolism	KEGG PATHWAY	gmx00591	9	48	0.00107011	0.00230176	Glyma.13G347700.1.p|Glyma.20G054000.1.p|Glyma.15G026500.1.p|Glyma.12G054700.1.p|Glyma.07G007000.1.p|Glyma.07G034900.1.p|Glyma.15G026400.1.p|Glyma.07G006900.1.p|Glyma.07G034800.1.p	http://www.genome.jp/kegg-bin/show_pathway?gmx00591/gmx:547835%09red/gmx:547856%09red/gmx:547836%09red/gmx:100802459%09red/gmx:100803358%09red/gmx:100101853%09red/gmx:106794093%09red/gmx:100127399%09red/gmx:100797626%09red
Arachidonic acid metabolism	KEGG PATHWAY	gmx00590	7	30	0.00128166	0.00270573	Glyma.05G240100.1.p|Glyma.19G154100.2.p|Glyma.08G013900.1.p|Glyma.17G223900.1.p|Glyma.08G047200.1.p|Glyma.08G013800.1.p|Glyma.18G021100.1.p	http://www.genome.jp/kegg-bin/show_pathway?gmx00590/gmx:100808523%09red/gmx:100527297%09red/gmx:100306295%09red/gmx:100797040%09red/gmx:100306136%09red/gmx:100305775%09red/gmx:100306590%09red
Cyanoamino acid metabolism	KEGG PATHWAY	gmx00460	12	84	0.00145805	0.00302214	Glyma.08G108900.2.p|Glyma.18G150000.1.p|Glyma.10G106600.1.p|Glyma.14G184500.1.p|Glyma.08G150400.1.p|Glyma.13G222300.1.p|Glyma.08G274400.1.p|Glyma.09G258000.1.p|Glyma.11G180900.1.p|Glyma.07G100500.1.p|Glyma.18G021100.1.p|Glyma.07G126200.1.p	http://www.genome.jp/kegg-bin/show_pathway?gmx00460/gmx:100305381%09red/gmx:100806420%09red/gmx:100499635%09red/gmx:100797040%09red/gmx:547729%09red/gmx:100305380%09red/gmx:100777131%09red/gmx:100809047%09red/gmx:100812952%09red/gmx:100814740%09red/gmx:100778110%09red
Tyrosine metabolism	KEGG PATHWAY	gmx00350	12	85	0.00159576	0.00324852	Glyma.05G181000.1.p|Glyma.06G275700.1.p|Glyma.08G282800.1.p|Glyma.06G082400.1.p|Glyma.07G245900.1.p|Glyma.17G216000.2.p|Glyma.06G122600.1.p|Glyma.14G111800.1.p|Glyma.09G010000.1.p|Glyma.13G183200.1.p|Glyma.13G183500.1.p|Glyma.03G168700.1.p	http://www.genome.jp/kegg-bin/show_pathway?gmx00350/gmx:100775700%09red/gmx:547792%09red/gmx:100801369%09red/gmx:100811514%09red/gmx:547813%09red/gmx:100801361%09red/gmx:100801918%09red/gmx:100783091%09red/gmx:547509%09red/gmx:100499743%09red/gmx:100798709%09red/gmx:100817986%09red
RNA degradation	KEGG PATHWAY	gmx03018	20	193	0.00198877	0.00397753	Glyma.08G337200.1.p|Glyma.02G155300.1.p|Glyma.18G229600.2.p|Glyma.02G103900.1.p|Glyma.20G079300.1.p|Glyma.10G194300.1.p|Glyma.16G036100.1.p|Glyma.01G024800.1.p|Glyma.15G250500.1.p|Glyma.16G204600.1.p|Glyma.07G126400.1.p|Glyma.07G215300.3.p|Glyma.08G175900.1.p|Glyma.02G304200.1.p|Glyma.10G193200.1.p|Glyma.03G190500.1.p|Glyma.19G190900.1.p|Glyma.17G240400.1.p|Glyma.02G082300.1.p|Glyma.20G197100.1.p	http://www.genome.jp/kegg-bin/show_pathway?gmx03018/gmx:547752%09red/gmx:100794539%09red/gmx:100795851%09red/gmx:100819369%09red/gmx:100818544%09red/gmx:100499782%09red/gmx:100811385%09red/gmx:100780329%09red/gmx:100813735%09red/gmx:100819741%09red/gmx:100820546%09red/gmx:100811084%09red/gmx:100787663%09red/gmx:100777674%09red/gmx:100811995%09red/gmx:100820495%09red/gmx:100789125%09red/gmx:100798…
Histidine metabolism	KEGG PATHWAY	gmx00340	8	43	0.00209079	0.00410949	Glyma.04G009800.1.p|Glyma.17G091000.1.p|Glyma.03G176400.1.p|Glyma.15G131700.1.p|Glyma.06G183900.1.p|Glyma.16G046900.1.p|Glyma.08G002700.1.p|Glyma.15G178400.1.p	http://www.genome.jp/kegg-bin/show_pathway?gmx00340/gmx:100811501%09red/gmx:100807276%09red/gmx:100816684%09red/gmx:100800699%09red/gmx:100817490%09red/gmx:100811186%09red/gmx:100527811%09red
Vitamin B6 metabolism	KEGG PATHWAY	gmx00750	6	25	0.00250827	0.00484648	Glyma.11G084400.1.p|Glyma.13G225000.1.p|Glyma.13G347100.1.p|Glyma.03G060100.1.p|Glyma.17G052000.1.p|Glyma.15G087200.1.p	http://www.genome.jp/kegg-bin/show_pathway?gmx00750/gmx:732627%09red/gmx:100816306%09red/gmx:100779355%09red/gmx:100776337%09red/gmx:100813292%09red/gmx:100788585%09red
Pantothenate and CoA biosynthesis	KEGG PATHWAY	gmx00770	9	56	0.00274279	0.00521131	Glyma.11G045300.1.p|Glyma.07G105400.1.p|Glyma.13G207900.1.p|Glyma.15G055500.1.p|Glyma.07G182100.1.p|Glyma.12G122900.1.p|Glyma.05G167700.1.p|Glyma.13G291300.1.p|Glyma.15G072500.1.p	http://www.genome.jp/kegg-bin/show_pathway?gmx00770/gmx:100779210%09red/gmx:100792563%09red/gmx:100783934%09red/gmx:100798328%09red/gmx:100818990%09red/gmx:100806689%09red/gmx:100797867%09red/gmx:100812763%09red/gmx:100789879%09red
Isoquinoline alkaloid biosynthesis	KEGG PATHWAY	gmx00950	8	46	0.0030273	0.00565758	Glyma.05G181000.1.p|Glyma.08G282800.1.p|Glyma.06G082400.1.p|Glyma.17G216000.2.p|Glyma.06G275700.1.p|Glyma.14G111800.1.p|Glyma.13G183200.1.p|Glyma.13G183500.1.p	http://www.genome.jp/kegg-bin/show_pathway?gmx00950/gmx:547792%09red/gmx:100801369%09red/gmx:100811514%09red/gmx:547813%09red/gmx:100801361%09red/gmx:100783091%09red/gmx:547509%09red/gmx:100798709%09red
Fatty acid degradation	KEGG PATHWAY	gmx00071	12	93	0.00312893	0.00575319	Glyma.10G124700.1.p|Glyma.17G091000.1.p|Glyma.06G183900.1.p|Glyma.14G004600.1.p|Glyma.20G143900.1.p|Glyma.11G035200.1.p|Glyma.06G122600.1.p|Glyma.01G225200.1.p|Glyma.08G002700.1.p|Glyma.07G246300.1.p|Glyma.03G168700.1.p|Glyma.15G178400.1.p	http://www.genome.jp/kegg-bin/show_pathway?gmx00071/gmx:100811501%09red/gmx:100776777%09red/gmx:100814965%09red/gmx:100801918%09red/gmx:100777319%09red/gmx:100800699%09red/gmx:100170734%09red/gmx:100301904%09red/gmx:547625%09red/gmx:100499743%09red/gmx:100811186%09red
Pyrimidine metabolism	KEGG PATHWAY	gmx00240	21	217	0.00329516	0.00596267	Glyma.16G043500.1.p|Glyma.11G088200.1.p|Glyma.04G216000.1.p|Glyma.16G043400.1.p|Glyma.17G127400.1.p|Glyma.16G036100.1.p|Glyma.10G125100.1.p|Glyma.07G105400.1.p|Glyma.06G150000.1.p|Glyma.10G113100.1.p|Glyma.07G182100.1.p|Glyma.16G083500.1.p|Glyma.05G216700.1.p|Glyma.11G154200.4.p|Glyma.03G069600.1.p|Glyma.07G115900.1.p|Glyma.03G088500.1.p|Glyma.15G055500.1.p|Glyma.03G102700.1.p|Glyma.13G328600.1.p…	http://www.genome.jp/kegg-bin/show_pathway?gmx00240/gmx:100797877%09red/gmx:100811753%09red/gmx:100790557%09red/gmx:100306684%09red/gmx:100818990%09red/gmx:100819254%09red/gmx:100819741%09red/gmx:100782385%09red/gmx:100784833%09red/gmx:100807008%09red/gmx:100788470%09red/gmx:100797867%09red/gmx:100527475%09red/gmx:100306603%09red/gmx:100792563%09red/gmx:100499661%09red/gmx:100806168%09red/gmx:100…
Riboflavin metabolism	KEGG PATHWAY	gmx00740	5	19	0.00410175	0.00730624	Glyma.12G112900.1.p|Glyma.08G087500.1.p|Glyma.15G041600.1.p|Glyma.13G042600.4.p|Glyma.07G071800.1.p	http://www.genome.jp/kegg-bin/show_pathway?gmx00740/gmx:100786573%09red/gmx:100791686%09red/gmx:100786393%09red/gmx:100818483%09red/gmx:100809163%09red
Arginine and proline metabolism	KEGG PATHWAY	gmx00330	14	123	0.00419092	0.00735023	Glyma.17G091000.1.p|Glyma.02G033900.1.p|Glyma.18G137100.1.p|Glyma.19G131500.1.p|Glyma.06G183900.1.p|Glyma.06G082400.1.p|Glyma.17G216000.2.p|Glyma.15G178400.1.p|Glyma.06G275700.1.p|Glyma.14G111800.1.p|Glyma.03G028000.1.p|Glyma.08G002700.1.p|Glyma.15G061600.1.p|Glyma.01G140200.1.p	http://www.genome.jp/kegg-bin/show_pathway?gmx00330/gmx:100811501%09red/gmx:100793450%09red/gmx:547792%09red/gmx:100792107%09red/gmx:100811514%09red/gmx:100776863%09red/gmx:547813%09red/gmx:547994%09red/gmx:100800699%09red/gmx:547509%09red/gmx:547907%09red/gmx:100811186%09red/gmx:100789799%09red
Starch and sucrose metabolism	KEGG PATHWAY	gmx00500	35	452	0.00620038	0.0107097	Glyma.19G125800.1.p|Glyma.08G180900.1.p|Glyma.02G304500.2.p|Glyma.10G106600.1.p|Glyma.19G192800.2.p|Glyma.03G192300.1.p|Glyma.13G152500.1.p|Glyma.12G064600.3.p|Glyma.19G022900.1.p|Glyma.08G044000.1.p|Glyma.07G100500.1.p|Glyma.02G241100.1.p|Glyma.02G245800.1.p|Glyma.13G161600.1.p|Glyma.13G062700.1.p|Glyma.05G056300.1.p|Glyma.08G044100.1.p|Glyma.08G150400.1.p|Glyma.11G127200.1.p|Glyma.04G092400.1.p…	http://www.genome.jp/kegg-bin/show_pathway?gmx00500/gmx:100775898%09red/gmx:100782830%09red/gmx:100785701%09red/gmx:100793021%09red/gmx:100780166%09red/gmx:100788844%09red/gmx:100791285%09red/gmx:100814740%09red/gmx:100794066%09red/gmx:100809452%09red/gmx:100792499%09red/gmx:100790112%09red/gmx:100780082%09red/gmx:100792948%09red/gmx:100816963%09red/gmx:100802730%09red/gmx:100799487%09red/gmx:100…
mRNA surveillance pathway	KEGG PATHWAY	gmx03015	20	216	0.0063219	0.0107567	Glyma.13G334200.1.p|Glyma.02G103900.1.p|Glyma.11G015500.1.p|Glyma.11G237500.3.p|Glyma.05G243400.1.p|Glyma.02G068500.2.p|Glyma.01G227300.1.p|Glyma.10G189500.1.p|Glyma.03G109200.1.p|Glyma.15G158800.1.p|Glyma.11G141500.2.p|Glyma.07G215300.3.p|Glyma.18G081700.1.p|Glyma.03G019600.1.p|Glyma.08G172000.1.p|Glyma.07G090200.1.p|Glyma.17G240400.1.p|Glyma.18G019700.1.p|Glyma.10G191400.1.p|Glyma.18G077300.4.p	http://www.genome.jp/kegg-bin/show_pathway?gmx03015/gmx:100816245%09red/gmx:100527139%09red/gmx:100804778%09red/gmx:100817317%09red/gmx:100794390%09red/gmx:100799440%09red/gmx:100811385%09red/gmx:100780329%09red/gmx:100813735%09red/gmx:100527187%09red/gmx:100811056%09red/gmx:100526922%09red/gmx:100783362%09red/gmx:100786788%09red/gmx:100778595%09red/gmx:100795032%09red/gmx:100499908%09red/gmx:100…
Monoterpenoid biosynthesis	KEGG PATHWAY	gmx00902	4	14	0.00800056	0.0134127	Glyma.07G073800.1.p|Glyma.03G014300.1.p|Glyma.18G229700.1.p|Glyma.09G262800.1.p	http://www.genome.jp/kegg-bin/show_pathway?gmx00902/gmx:100804943%09red/gmx:100801677%09red/gmx:106797124%09red/gmx:100806995%09red
Phenylpropanoid biosynthesis	KEGG PATHWAY	gmx00940	27	332	0.00849491	0.0140351	Glyma.03G145600.1.p|Glyma.02G234200.1.p|Glyma.16G164200.1.p|Glyma.13G106400.1.p|Glyma.14G201800.1.p|Glyma.10G106600.1.p|Glyma.09G022400.1.p|Glyma.17G171100.1.p|Glyma.10G222500.1.p|Glyma.07G100500.1.p|Glyma.12G129500.1.p|Glyma.09G022900.1.p|Glyma.08G150400.1.p|Glyma.07G087500.1.p|Glyma.20G169200.1.p|Glyma.08G179600.1.p|Glyma.20G214200.1.p|Glyma.09G277800.1.p|Glyma.14G053700.1.p|Glyma.19G091800.1.p…	http://www.genome.jp/kegg-bin/show_pathway?gmx00940/gmx:100783920%09red/gmx:547499%09red/gmx:100809071%09red/gmx:100793973%09red/gmx:100815671%09red/gmx:100814740%09red/gmx:100814455%09red/gmx:100817540%09red/gmx:547550%09red/gmx:100305498%09red/gmx:547871%09red/gmx:100775837%09red/gmx:100804126%09red/gmx:547729%09red/gmx:100809047%09red/gmx:100783115%09red/gmx:100808944%09red/gmx:100812478%09red…
Folate biosynthesis	KEGG PATHWAY	gmx00790	6	36	0.0116633	0.0187955	Glyma.13G267900.1.p|Glyma.13G268000.1.p|Glyma.03G203800.4.p|Glyma.02G251400.1.p|Glyma.13G267800.1.p|Glyma.07G068300.1.p	http://www.genome.jp/kegg-bin/show_pathway?gmx00790/gmx:100527653%09red/gmx:547881%09red/gmx:100526908%09red/gmx:100796947%09red/gmx:100811054%09red
Phenylalanine metabolism	KEGG PATHWAY	gmx00360	9	72	0.011706	0.0187955	Glyma.05G181000.1.p|Glyma.11G194500.1.p|Glyma.08G282800.1.p|Glyma.06G082400.1.p|Glyma.17G216000.2.p|Glyma.17G171100.1.p|Glyma.06G275700.1.p|Glyma.14G111800.1.p|Glyma.07G214700.1.p	http://www.genome.jp/kegg-bin/show_pathway?gmx00360/gmx:100808944%09red/gmx:547792%09red/gmx:100811247%09red/gmx:100811514%09red/gmx:547813%09red/gmx:100801361%09red/gmx:100305498%09red/gmx:100783091%09red/gmx:547509%09red
Pentose and glucuronate interconversions	KEGG PATHWAY	gmx00040	17	194	0.0176454	0.0279385	Glyma.15G127500.1.p|Glyma.17G091000.1.p|Glyma.12G036700.1.p|Glyma.08G044000.1.p|Glyma.19G088400.1.p|Glyma.17G066200.3.p|Glyma.06G183900.1.p|Glyma.04G088400.1.p|Glyma.14G210700.1.p|Glyma.13G152500.1.p|Glyma.16G199200.1.p|Glyma.07G046000.1.p|Glyma.08G002700.1.p|Glyma.05G025300.2.p|Glyma.17G101700.2.p|Glyma.15G184400.1.p|Glyma.02G241100.1.p	http://www.genome.jp/kegg-bin/show_pathway?gmx00040/gmx:100811501%09red/gmx:100775898%09red/gmx:100785701%09red/gmx:100790112%09red/gmx:100806500%09red/gmx:100778495%09red/gmx:100777500%09red/gmx:100500085%09red/gmx:100804624%09red/gmx:100800699%09red/gmx:100777646%09red/gmx:100786514%09red/gmx:100820630%09red/gmx:100794066%09red/gmx:100817791%09red
alpha-Linolenic acid metabolism	KEGG PATHWAY	gmx00592	11	106	0.0185857	0.0290243	Glyma.20G054000.1.p|Glyma.01G235600.1.p|Glyma.12G054700.1.p|Glyma.13G109700.2.p|Glyma.12G191400.1.p|Glyma.11G035200.1.p|Glyma.06G122600.1.p|Glyma.10G124700.1.p|Glyma.07G246300.1.p|Glyma.18G280900.1.p|Glyma.11G122700.1.p	http://www.genome.jp/kegg-bin/show_pathway?gmx00592/gmx:106794093%09red/gmx:100810890%09red/gmx:100797626%09red/gmx:547625%09red/gmx:100784395%09red/gmx:100801918%09red/gmx:100777319%09red/gmx:100170734%09red/gmx:100805194%09red/gmx:100796226%09red/gmx:100803381%09red
Lysine degradation	KEGG PATHWAY	gmx00310	7	54	0.0210636	0.0324494	Glyma.17G091000.1.p|Glyma.02G094300.1.p|Glyma.02G292500.1.p|Glyma.06G183900.1.p|Glyma.14G004600.1.p|Glyma.08G002700.1.p|Glyma.15G178400.1.p	http://www.genome.jp/kegg-bin/show_pathway?gmx00310/gmx:100811501%09red/gmx:100776777%09red/gmx:100800699%09red/gmx:100786978%09red/gmx:100811186%09red/gmx:100799149%09red
Other glycan degradation	KEGG PATHWAY	gmx00511	5	31	0.0231623	0.0352067	Glyma.16G048100.1.p|Glyma.18G286200.1.p|Glyma.10G260900.1.p|Glyma.04G200900.1.p|Glyma.02G046800.1.p	http://www.genome.jp/kegg-bin/show_pathway?gmx00511/gmx:100798150%09red/gmx:100776282%09red/gmx:100817294%09red/gmx:100775419%09red/gmx:100776871%09red
Biosynthesis of unsaturated fatty acids	KEGG PATHWAY	gmx01040	6	44	0.0259911	0.0387854	Glyma.10G124700.1.p|Glyma.11G035200.1.p|Glyma.18G009200.1.p|Glyma.07G207200.1.p|Glyma.16G042000.1.p|Glyma.11G248000.1.p	http://www.genome.jp/kegg-bin/show_pathway?gmx01040/gmx:100217331%09red/gmx:100809809%09red/gmx:100806814%09red/gmx:100809416%09red/gmx:100170734%09red/gmx:547625%09red
Tryptophan metabolism	KEGG PATHWAY	gmx00380	8	70	0.0261971	0.0387854	Glyma.17G091000.1.p|Glyma.02G094300.1.p|Glyma.06G183900.1.p|Glyma.14G004600.1.p|Glyma.04G017500.1.p|Glyma.06G017900.1.p|Glyma.08G002700.1.p|Glyma.15G178400.1.p	http://www.genome.jp/kegg-bin/show_pathway?gmx00380/gmx:100811501%09red/gmx:100776777%09red/gmx:100800699%09red/gmx:100786978%09red/gmx:547511%09red/gmx:100811186%09red/gmx:100037448%09red
Thiamine metabolism	KEGG PATHWAY	gmx00730	4	27	0.0515454	0.0753357	Glyma.01G197100.2.p|Glyma.18G065700.3.p|Glyma.08G188200.1.p|Glyma.10G251500.1.p	http://www.genome.jp/kegg-bin/show_pathway?gmx00730/gmx:100785725%09red/gmx:100788953%09red/gmx:100787350%09red/gmx:100811722%09red
Limonene and pinene degradation	KEGG PATHWAY	gmx00903	3	19	0.0771625	0.111348	Glyma.17G091000.1.p|Glyma.06G183900.1.p|Glyma.08G002700.1.p	http://www.genome.jp/kegg-bin/show_pathway?gmx00903/gmx:100811501%09red/gmx:100800699%09red
Taurine and hypotaurine metabolism	KEGG PATHWAY	gmx00430	4	34	0.094483	0.134638	Glyma.18G043600.1.p|Glyma.16G218500.1.p|Glyma.18G021100.1.p|Glyma.07G126200.1.p	http://www.genome.jp/kegg-bin/show_pathway?gmx00430/gmx:100777131%09red/gmx:547724%09red/gmx:100783047%09red/gmx:100797040%09red
Endocytosis	KEGG PATHWAY	gmx04144	22	334	0.0965583	0.135897	Glyma.13G364900.2.p|Glyma.02G075900.1.p|Glyma.02G201400.1.p|Glyma.19G172700.1.p|Glyma.08G271700.1.p|Glyma.12G147400.1.p|Glyma.10G195600.1.p|Glyma.08G211700.1.p|Glyma.12G183700.1.p|Glyma.11G140500.1.p|Glyma.13G352200.1.p|Glyma.07G127300.1.p|Glyma.03G171100.1.p|Glyma.04G210200.2.p|Glyma.09G002100.1.p|Glyma.19G172200.1.p|Glyma.09G068000.1.p|Glyma.12G064000.1.p|Glyma.07G170800.1.p|Glyma.18G289100.1.p…	http://www.genome.jp/kegg-bin/show_pathway?gmx04144/gmx:100786410%09red/gmx:100807561%09red/gmx:100784434%09red/gmx:100806836%09red/gmx:100778966%09red/gmx:100775459%09red/gmx:102667572%09red/gmx:100816111%09red/gmx:100802587%09red/gmx:100777767%09red/gmx:100780154%09red/gmx:100785169%09red/gmx:100777531%09red/gmx:100812707%09red/gmx:100798307%09red/gmx:100805899%09red/gmx:100787543%09red/gmx:100…
Carotenoid biosynthesis	KEGG PATHWAY	gmx00906	6	64	0.100896	0.14027	Glyma.19G251000.1.p|Glyma.11G253000.1.p|Glyma.17G174500.1.p|Glyma.11G151400.1.p|Glyma.03G253500.1.p|Glyma.01G154900.1.p	http://www.genome.jp/kegg-bin/show_pathway?gmx00906/gmx:100127420%09red/gmx:100816085%09red/gmx:100800186%09red/gmx:100778118%09red/gmx:100777875%09red/gmx:100786658%09red
Plant-pathogen interaction	KEGG PATHWAY	gmx04626	21	325	0.116984	0.160677	Glyma.08G177600.1.p|Glyma.05G245600.1.p|Glyma.14G219700.1.p|Glyma.01G211700.1.p|Glyma.11G030100.1.p|Glyma.15G062700.1.p|Glyma.10G295700.1.p|Glyma.08G053500.3.p|Glyma.02G008500.1.p|Glyma.01G068000.1.p|Glyma.14G007700.1.p|Glyma.02G124500.1.p|Glyma.16G090700.1.p|Glyma.18G039500.1.p|Glyma.18G074100.1.p|Glyma.09G131500.1.p|Glyma.17G258700.1.p|Glyma.11G021000.1.p|Glyma.02G275600.1.p|Glyma.08G265200.1.p…	http://www.genome.jp/kegg-bin/show_pathway?gmx04626/gmx:100779976%09red/gmx:100808383%09red/gmx:100791597%09red/gmx:100500081%09red/gmx:100808509%09red/gmx:100790016%09red/gmx:100785017%09red/gmx:100527568%09red/gmx:100784022%09red/gmx:100794671%09red/gmx:100817351%09red/gmx:100500636%09red/gmx:100783572%09red/gmx:100811234%09red/gmx:100807250%09red/gmx:100194422%09red/gmx:100194423%09red/gmx:100…
SNARE interactions in vesicular transport	KEGG PATHWAY	gmx04130	7	87	0.13955	0.18939	Glyma.09G097700.1.p|Glyma.01G015600.1.p|Glyma.13G060700.1.p|Glyma.02G195400.1.p|Glyma.02G279100.1.p|Glyma.18G089600.1.p|Glyma.10G051400.1.p	http://www.genome.jp/kegg-bin/show_pathway?gmx04130/gmx:100809258%09red/gmx:100816145%09red/gmx:100794038%09red/gmx:100819272%09red/gmx:100803941%09red/gmx:100306336%09red/gmx:100810149%09red
Protein export	KEGG PATHWAY	gmx03060	7	91	0.162362	0.217756	Glyma.08G346000.2.p|Glyma.08G025700.1.p|Glyma.03G196900.1.p|Glyma.08G038100.1.p|Glyma.12G064100.1.p|Glyma.20G224600.1.p|Glyma.11G245300.1.p	http://www.genome.jp/kegg-bin/show_pathway?gmx03060/gmx:100782581%09red/gmx:100811012%09red/gmx:100817173%09red/gmx:547838%09red/gmx:100815810%09red/gmx:100815190%09red/gmx:100807037%09red
Synthesis and degradation of ketone bodies	KEGG PATHWAY	gmx00072	2	14	0.16479	0.218442	Glyma.14G004600.1.p|Glyma.19G128600.3.p	http://www.genome.jp/kegg-bin/show_pathway?gmx00072/gmx:100801507%09red/gmx:100776777%09red
Sulfur relay system	KEGG PATHWAY	gmx04122	2	17	0.215229	0.282025	Glyma.01G197100.2.p|Glyma.08G167100.1.p	http://www.genome.jp/kegg-bin/show_pathway?gmx04122/gmx:100785725%09red/gmx:100798053%09red
Glycosphingolipid biosynthesis - globo series	KEGG PATHWAY	gmx00603	2	21	0.284041	0.367962	Glyma.18G286200.1.p|Glyma.18G215700.1.p	http://www.genome.jp/kegg-bin/show_pathway?gmx00603/gmx:100776871%09red/gmx:100812330%09red
Glycerolipid metabolism	KEGG PATHWAY	gmx00561	8	135	0.332198	0.425512	Glyma.17G091000.1.p|Glyma.12G036700.1.p|Glyma.15G012500.1.p|Glyma.06G183900.1.p|Glyma.18G215700.1.p|Glyma.08G002700.1.p|Glyma.13G361400.1.p|Glyma.15G178400.1.p	http://www.genome.jp/kegg-bin/show_pathway?gmx00561/gmx:100811501%09red/gmx:100806500%09red/gmx:100820573%09red/gmx:100800699%09red/gmx:100812330%09red/gmx:100806896%09red/gmx:100811186%09red
Glycosphingolipid biosynthesis - ganglio series	KEGG PATHWAY	gmx00604	1	8	0.344076	0.435829	Glyma.18G286200.1.p	http://www.genome.jp/kegg-bin/show_pathway?gmx00604/gmx:100776871%09red
Phosphatidylinositol signaling system	KEGG PATHWAY	gmx04070	7	118	0.347931	0.435869	Glyma.04G009800.1.p|Glyma.15G115500.1.p|Glyma.08G086800.1.p|Glyma.06G218300.1.p|Glyma.20G126600.1.p|Glyma.14G059200.1.p|Glyma.02G275600.1.p	http://www.genome.jp/kegg-bin/show_pathway?gmx04070/gmx:100796770%09red/gmx:100817415%09red/gmx:100817591%09red/gmx:547864%09red/gmx:100817351%09red/gmx:100799214%09red/gmx:100527811%09red
Stilbenoid, diarylheptanoid and gingerol biosynthesis	KEGG PATHWAY	gmx00945	3	44	0.365135	0.45245	Glyma.18G103500.1.p|Glyma.17G171100.1.p|Glyma.07G214700.1.p	http://www.genome.jp/kegg-bin/show_pathway?gmx00945/gmx:100803418%09red/gmx:100811247%09red/gmx:100305498%09red
Flavone and flavonol biosynthesis	KEGG PATHWAY	gmx00944	1	10	0.402758	0.493703	Glyma.06G137100.1.p	http://www.genome.jp/kegg-bin/show_pathway?gmx00944/gmx:100805999%09red
Steroid biosynthesis	KEGG PATHWAY	gmx00100	3	60	0.555182	0.673306	Glyma.11G112000.1.p|Glyma.10G090500.1.p|Glyma.12G028300.2.p	http://www.genome.jp/kegg-bin/show_pathway?gmx00100/gmx:100814521%09red/gmx:100775983%09red/gmx:548073%09red
Flavonoid biosynthesis	KEGG PATHWAY	gmx00941	4	86	0.594671	0.713605	Glyma.18G103500.1.p|Glyma.17G171100.1.p|Glyma.07G214700.1.p|Glyma.20G241500.1.p	http://www.genome.jp/kegg-bin/show_pathway?gmx00941/gmx:100803418%09red/gmx:100811247%09red/gmx:547602%09red/gmx:100305498%09red
Sesquiterpenoid and triterpenoid biosynthesis	KEGG PATHWAY	gmx00909	1	20	0.626224	0.743641	Glyma.11G112000.1.p	http://www.genome.jp/kegg-bin/show_pathway?gmx00909/gmx:100775983%09red
Ether lipid metabolism	KEGG PATHWAY	gmx00565	2	47	0.662805	0.778967	Glyma.08G211700.1.p|Glyma.13G364900.2.p	http://www.genome.jp/kegg-bin/show_pathway?gmx00565/gmx:100784434%09red/gmx:100786410%09red
Mismatch repair	KEGG PATHWAY	gmx03430	3	74	0.69038	0.800862	Glyma.13G236400.1.p|Glyma.01G030600.1.p|Glyma.08G334900.1.p	http://www.genome.jp/kegg-bin/show_pathway?gmx03430/gmx:100499859%09red/gmx:548079%09red/gmx:100499987%09red
Nucleotide excision repair	KEGG PATHWAY	gmx03420	5	122	0.695485	0.800862	Glyma.13G236400.1.p|Glyma.01G030600.1.p|Glyma.08G334900.1.p|Glyma.20G114700.1.p|Glyma.01G081500.1.p	http://www.genome.jp/kegg-bin/show_pathway?gmx03420/gmx:100499859%09red/gmx:548079%09red/gmx:100814162%09red/gmx:100809066%09red/gmx:100499987%09red
Glycosaminoglycan degradation	KEGG PATHWAY	gmx00531	1	30	0.766097	0.870316	Glyma.18G286200.1.p	http://www.genome.jp/kegg-bin/show_pathway?gmx00531/gmx:100776871%09red
Ribosome biogenesis in eukaryotes	KEGG PATHWAY	gmx03008	6	159	0.771069	0.870316	Glyma.04G069200.1.p|Glyma.03G164500.1.p|Glyma.18G020000.1.p|Glyma.05G104200.1.p|Glyma.13G167800.1.p|Glyma.19G165900.1.p	http://www.genome.jp/kegg-bin/show_pathway?gmx03008/gmx:100306376%09red/gmx:100500467%09red/gmx:100813605%09red/gmx:100789137%09red/gmx:100819679%09red/gmx:100527424%09red
Ubiquinone and other terpenoid-quinone biosynthesis	KEGG PATHWAY	gmx00130	3	89	0.798231	0.886372	Glyma.11G194500.1.p|Glyma.08G285500.1.p|Glyma.02G143700.1.p	http://www.genome.jp/kegg-bin/show_pathway?gmx00130/gmx:100783986%09red/gmx:100808944%09red/gmx:100807101%09red
Ubiquitin mediated proteolysis	KEGG PATHWAY	gmx04120	8	214	0.800845	0.886372	Glyma.11G079600.1.p|Glyma.10G133700.1.p|Glyma.04G199200.2.p|Glyma.09G257800.1.p|Glyma.04G096900.1.p|Glyma.04G173300.1.p|Glyma.01G163900.1.p|Glyma.13G270800.1.p	http://www.genome.jp/kegg-bin/show_pathway?gmx04120/gmx:100812138%09red/gmx:100812184%09red/gmx:100809769%09red/gmx:100527683%09red/gmx:100499698%09red/gmx:100499741%09red/gmx:100800213%09red/gmx:100805631%09red
AGE-RAGE signaling pathway in diabetic complications	KEGG PATHWAY	gmx04933	1	35	0.814974	0.893337	Glyma.14G059200.1.p	http://www.genome.jp/kegg-bin/show_pathway?gmx04933/gmx:547864%09red
Base excision repair	KEGG PATHWAY	gmx03410	2	69	0.841942	0.914108	Glyma.01G116000.6.p|Glyma.08G334900.1.p	http://www.genome.jp/kegg-bin/show_pathway?gmx03410/gmx:548079%09red/gmx:100305961%09red
DNA replication	KEGG PATHWAY	gmx03030	3	106	0.880539	0.946995	Glyma.13G236400.1.p|Glyma.01G030600.1.p|Glyma.08G334900.1.p	http://www.genome.jp/kegg-bin/show_pathway?gmx03030/gmx:100499859%09red/gmx:548079%09red/gmx:100499987%09red
Sphingolipid metabolism	KEGG PATHWAY	gmx00600	1	47	0.894593	0.948107	Glyma.18G215700.1.p	http://www.genome.jp/kegg-bin/show_pathway?gmx00600/gmx:100812330%09red
Homologous recombination	KEGG PATHWAY	gmx03440	2	81	0.898207	0.948107	Glyma.13G236400.1.p|Glyma.01G030600.1.p	http://www.genome.jp/kegg-bin/show_pathway?gmx03440/gmx:100499859%09red/gmx:100499987%09red
Cutin, suberine and wax biosynthesis	KEGG PATHWAY	gmx00073	1	52	0.916625	0.958672	Glyma.09G123800.1.p	http://www.genome.jp/kegg-bin/show_pathway?gmx00073/gmx:100799842%09red
RNA polymerase	KEGG PATHWAY	gmx03020	1	73	0.968866	0.999132	Glyma.03G088500.1.p	http://www.genome.jp/kegg-bin/show_pathway?gmx03020/gmx:100499661%09red
Basal transcription factors	KEGG PATHWAY	gmx03022	1	89	0.985305	0.999132	Glyma.17G037200.1.p	http://www.genome.jp/kegg-bin/show_pathway?gmx03022/gmx:100306277%09red
Glycerophospholipid metabolism	KEGG PATHWAY	gmx00564	3	173	0.988321	0.999132	Glyma.08G211700.1.p|Glyma.13G364900.2.p|Glyma.17G078900.1.p	http://www.genome.jp/kegg-bin/show_pathway?gmx00564/gmx:100800181%09red/gmx:100784434%09red/gmx:100786410%09red
Circadian rhythm - plant	KEGG PATHWAY	gmx04712	1	98	0.990368	0.999132	Glyma.05G104200.1.p	http://www.genome.jp/kegg-bin/show_pathway?gmx04712/gmx:100819679%09red
Plant hormone signal transduction	KEGG PATHWAY	gmx04075	4	618	1	1	Glyma.08G133600.1.p|Glyma.04G039300.1.p|Glyma.01G097000.1.p|Glyma.15G062700.1.p	http://www.genome.jp/kegg-bin/show_pathway?gmx04075/gmx:100807981%09red/gmx:100819313%09red/gmx:100791384%09red/gmx:100807250%09red
--------------------
#Term	Database	ID	Input number	Background number	P-Value	Corrected P-Value	Input	Hyperlink
--------------------
#Term	Database	ID	Input number	Background number	P-Value	Corrected P-Value	Input	Hyperlink
--------------------

## Sheet: identified_prot.1h.enrich
##Databases: KEGG PATHWAY
##Statistical test method: hypergeometric test / Fisher's exact test
##FDR correction method: Benjamini and Hochberg
#Term	Database	ID	Input number	Background number	P-Value	Corrected P-Value	Input	Hyperlink
Metabolic pathways	KEGG PATHWAY	gmx01100	587	3553	2.9225e-148	3.30242e-146	Glyma.03G145600.1.p|Glyma.20G212900.1.p|Glyma.08G082900.1.p|Glyma.02G138400.1.p|Glyma.18G195900.1.p|Glyma.14G210700.1.p|Glyma.13G152500.1.p|Glyma.11G094700.1.p|Glyma.18G244900.1.p|Glyma.15G248500.1.p|Glyma.10G214200.3.p|Glyma.01G164300.1.p|Glyma.18G280900.1.p|Glyma.17G066200.3.p|Glyma.06G082400.1.p|Glyma.05G151100.1.p|Glyma.04G193500.1.p|Glyma.12G215100.1.p|Glyma.08G002700.1.p|Glyma.06G270400.1.p…	http://www.genome.jp/kegg-bin/show_pathway?gmx01100/gmx:100810730%09red/gmx:100805941%09red/gmx:100779074%09red/gmx:732571%09red/gmx:100781928%09red/gmx:100811326%09red/gmx:100306034%09red/gmx:100790110%09red/gmx:100790112%09red/gmx:100794734%09red/gmx:100817945%09red/gmx:100801918%09red/gmx:100800699%09red/gmx:100814183%09red/gmx:100789125%09red/gmx:100804126%09red/gmx:100808375%09red/gmx:100793…
Biosynthesis of secondary metabolites	KEGG PATHWAY	gmx01110	343	2026	1.58054e-85	8.93003e-84	Glyma.03G145600.1.p|Glyma.02G138400.1.p|Glyma.18G195900.1.p|Glyma.11G094700.1.p|Glyma.18G244900.1.p|Glyma.15G248500.1.p|Glyma.01G164300.1.p|Glyma.18G280900.1.p|Glyma.06G082400.1.p|Glyma.05G151100.1.p|Glyma.04G193500.1.p|Glyma.08G002700.1.p|Glyma.06G270400.1.p|Glyma.03G190500.1.p|Glyma.16G004400.1.p|Glyma.08G334000.1.p|Glyma.08G292800.1.p|Glyma.11G021400.1.p|Glyma.01G227400.1.p|Glyma.05G046300.1.p…	http://www.genome.jp/kegg-bin/show_pathway?gmx01110/gmx:100814810%09red/gmx:100819824%09red/gmx:100799162%09red/gmx:547963%09red/gmx:547550%09red/gmx:100780166%09red/gmx:100788930%09red/gmx:100818028%09red/gmx:100809241%09red/gmx:100787459%09red/gmx:100803176%09red/gmx:100808361%09red/gmx:100786103%09red/gmx:100783091%09red/gmx:100790249%09red/gmx:100820392%09red/gmx:100499743%09red/gmx:100800753…
Carbon metabolism	KEGG PATHWAY	gmx01200	162	488	1.21067e-73	4.56019e-72	Glyma.07G182300.1.p|Glyma.10G039000.1.p|Glyma.16G041200.1.p|Glyma.10G194300.1.p|Glyma.07G142700.1.p|Glyma.02G138400.1.p|Glyma.18G195900.1.p|Glyma.19G186000.1.p|Glyma.12G210600.1.p|Glyma.20G129400.1.p|Glyma.18G244900.1.p|Glyma.15G248500.1.p|Glyma.05G000700.2.p|Glyma.08G302600.1.p|Glyma.05G026300.1.p|Glyma.08G020500.1.p|Glyma.20G114500.2.p|Glyma.19G088400.1.p|Glyma.06G082400.1.p|Glyma.16G028700.1.p…	http://www.genome.jp/kegg-bin/show_pathway?gmx01200/gmx:100819824%09red/gmx:100780041%09red/gmx:100818028%09red/gmx:100809241%09red/gmx:547631%09red/gmx:732655%09red/gmx:100802847%09red/gmx:100797319%09red/gmx:100499743%09red/gmx:732571%09red/gmx:100781928%09red/gmx:100805786%09red/gmx:100789900%09red/gmx:100811326%09red/gmx:100790110%09red/gmx:547963%09red/gmx:100799358%09red/gmx:100789100%09red…
Biosynthesis of amino acids	KEGG PATHWAY	gmx01230	126	429	1.67106e-52	4.72075e-51	Glyma.02G138400.1.p|Glyma.09G235400.1.p|Glyma.03G181200.1.p|Glyma.19G186000.1.p|Glyma.20G129400.1.p|Glyma.13G144900.1.p|Glyma.05G000700.2.p|Glyma.01G164300.1.p|Glyma.19G088400.1.p|Glyma.06G082400.1.p|Glyma.05G151100.1.p|Glyma.13G131900.1.p|Glyma.03G244800.2.p|Glyma.04G193500.1.p|Glyma.16G046900.1.p|Glyma.19G114500.2.p|Glyma.08G157700.1.p|Glyma.03G190500.1.p|Glyma.04G009800.1.p|Glyma.04G008300.1.p…	http://www.genome.jp/kegg-bin/show_pathway?gmx01230/gmx:100819824%09red/gmx:100818028%09red/gmx:547631%09red/gmx:100808361%09red/gmx:100786103%09red/gmx:100820392%09red/gmx:100808771%09red/gmx:100805786%09red/gmx:100789900%09red/gmx:100811326%09red/gmx:100790110%09red/gmx:100780873%09red/gmx:100807276%09red/gmx:100806689%09red/gmx:100799358%09red/gmx:100812202%09red/gmx:100786832%09red/gmx:100101…
Ribosome	KEGG PATHWAY	gmx03010	141	595	3.60607e-49	8.14971e-48	Glyma.15G185000.1.p|Glyma.04G224000.1.p|Glyma.13G285600.1.p|Glyma.09G255500.1.p|Glyma.20G237400.1.p|Glyma.13G243100.1.p|Glyma.02G085300.1.p|Glyma.12G184900.2.p|Glyma.07G114900.2.p|Glyma.02G103600.1.p|Glyma.08G141700.1.p|Glyma.13G237800.1.p|Glyma.09G138400.1.p|Glyma.11G146300.1.p|Glyma.08G151900.1.p|Glyma.08G159800.1.p|Glyma.10G067800.1.p|Glyma.19G145100.1.p|Glyma.04G132900.1.p|Glyma.04G253300.1.p…	http://www.genome.jp/kegg-bin/show_pathway?gmx03010/gmx:100305682%09red/gmx:100794937%09red/gmx:100786828%09red/gmx:3989263%09red/gmx:100795924%09red/gmx:100793713%09red/gmx:100811498%09red/gmx:100811654%09red/gmx:100305981%09red/gmx:100499742%09red/gmx:100800463%09red/gmx:100500355%09red/gmx:100786189%09red/gmx:100782305%09red/gmx:100499912%09red/gmx:100499910%09red/gmx:100499673%09red/gmx:10049…
Carbon fixation in photosynthetic organisms	KEGG PATHWAY	gmx00710	65	129	8.91066e-39	1.67817e-37	Glyma.19G106800.1.p|Glyma.07G182300.1.p|Glyma.10G205500.1.p|Glyma.18G193600.1.p|Glyma.10G006500.1.p|Glyma.14G010900.1.p|Glyma.07G142700.1.p|Glyma.12G037400.1.p|Glyma.17G020600.1.p|Glyma.19G186000.1.p|Glyma.12G210600.1.p|Glyma.02G038100.2.p|Glyma.15G136200.1.p|Glyma.12G159300.1.p|Glyma.12G061600.1.p|Glyma.10G293500.1.p|Glyma.05G026300.1.p|Glyma.06G275700.1.p|Glyma.17G101700.2.p|Glyma.03G102900.1.p…	http://www.genome.jp/kegg-bin/show_pathway?gmx00710/gmx:100819824%09red/gmx:100777515%09red/gmx:547963%09red/gmx:100818028%09red/gmx:100792666%09red/gmx:547756%09red/gmx:100807126%09red/gmx:100797319%09red/gmx:547755%09red/gmx:100786122%09red/gmx:732571%09red/gmx:547514%09red/gmx:100794277%09red/gmx:732641%09red/gmx:100127415%09red/gmx:100799793%09red/gmx:100802480%09red/gmx:100806545%09red/gmx:1…
Photosynthesis	KEGG PATHWAY	gmx00195	58	120	5.36854e-34	8.66636e-33	Glyma.01G238000.1.p|Glyma.01G153500.1.p|Glyma.13G204800.1.p|Glyma.08G173700.1.p|Glyma.09G250800.1.p|Glyma.08G126800.1.p|Glyma.05G022900.1.p|Glyma.08G304200.1.p|Glyma.04G249700.1.p|Glyma.07G112000.2.p|Glyma.18G114900.1.p|Glyma.03G114600.1.p|Glyma.10G040600.1.p|Glyma.06G067400.1.p|Glyma.01G180800.1.p|Glyma.02G047600.1.p|Glyma.10G249000.1.p|Glyma.05G074900.1.p|Glyma.15G016300.1.p|Glyma.17G130100.1.p…	http://www.genome.jp/kegg-bin/show_pathway?gmx00195/gmx:100101915%09red/gmx:100785563%09red/gmx:100499708%09red/gmx:100781848%09red/gmx:100797290%09red/gmx:3989266%09red/gmx:3989267%09red/gmx:100814163%09red/gmx:100818731%09red/gmx:3989326%09red/gmx:100306554%09red/gmx:100499729%09red/gmx:100813636%09red/gmx:3989309%09red/gmx:100780777%09red/gmx:100306034%09red/gmx:100802315%09red/gmx:100802032%0…
Glyoxylate and dicarboxylate metabolism	KEGG PATHWAY	gmx00630	50	130	6.64422e-26	9.38496e-25	Glyma.13G210800.2.p|Glyma.10G006500.1.p|Glyma.15G012500.1.p|Glyma.08G175800.1.p|Glyma.05G026300.1.p|Glyma.01G026700.1.p|Glyma.07G232900.1.p|Glyma.18G244900.1.p|Glyma.02G038100.2.p|Glyma.08G302600.1.p|Glyma.12G061600.1.p|Glyma.12G159300.1.p|Glyma.15G143100.1.p|Glyma.20G019600.1.p|Glyma.09G247900.1.p|Glyma.18G116900.1.p|Glyma.16G028700.1.p|Glyma.18G296900.1.p|Glyma.20G107800.1.p|Glyma.14G094700.1.p…	http://www.genome.jp/kegg-bin/show_pathway?gmx00630/gmx:100779623%09red/gmx:547963%09red/gmx:100809241%09red/gmx:100803176%09red/gmx:100802847%09red/gmx:100817216%09red/gmx:547511%09red/gmx:100781928%09red/gmx:100811402%09red/gmx:100794277%09red/gmx:100781418%09red/gmx:100127415%09red/gmx:100799793%09red/gmx:100780873%09red/gmx:732641%09red/gmx:100037448%09red/gmx:100806896%09red/gmx:547640%09red…
Oxidative phosphorylation	KEGG PATHWAY	gmx00190	62	237	3.15072e-24	3.9559e-23	Glyma.13G367000.1.p|Glyma.03G180700.1.p|Glyma.05G110100.1.p|Glyma.05G223100.1.p|Glyma.14G177100.2.p|Glyma.13G127400.2.p|Glyma.11G070800.2.p|Glyma.10G052700.1.p|Glyma.10G267200.1.p|Glyma.13G253600.1.p|Glyma.08G209700.1.p|Glyma.09G245700.1.p|Glyma.11G091800.1.p|Glyma.13G362900.2.p|Glyma.09G014000.1.p|Glyma.07G117000.1.p|Glyma.15G061300.1.p|Glyma.06G203200.1.p|Glyma.07G023400.1.p|Glyma.20G177700.1.p…	http://www.genome.jp/kegg-bin/show_pathway?gmx00190/gmx:100817153%09red/gmx:100306371%09red/gmx:100782702%09red/gmx:100306258%09red/gmx:100797290%09red/gmx:100775727%09red/gmx:100780778%09red/gmx:100791692%09red/gmx:100798544%09red/gmx:100306450%09red/gmx:3989298%09red/gmx:100783125%09red/gmx:100527776%09red/gmx:100814088%09red/gmx:100526984%09red/gmx:100787109%09red/gmx:100777389%09red/gmx:10079…
Glycolysis / Gluconeogenesis	KEGG PATHWAY	gmx00010	62	253	5.73472e-23	6.48023e-22	Glyma.07G182300.1.p|Glyma.01G173300.1.p|Glyma.18G193600.1.p|Glyma.20G114500.2.p|Glyma.14G010900.1.p|Glyma.07G142700.1.p|Glyma.02G026800.1.p|Glyma.15G038100.1.p|Glyma.20G007400.1.p|Glyma.12G037400.1.p|Glyma.02G202500.1.p|Glyma.07G232900.1.p|Glyma.01G024800.1.p|Glyma.05G000700.2.p|Glyma.13G098500.1.p|Glyma.15G178400.1.p|Glyma.10G241000.1.p|Glyma.15G143100.1.p|Glyma.14G186900.2.p|Glyma.07G126400.1.p…	http://www.genome.jp/kegg-bin/show_pathway?gmx00010/gmx:100800280%09red/gmx:100819824%09red/gmx:100801951%09red/gmx:100780041%09red/gmx:100813087%09red/gmx:100780166%09red/gmx:100805001%09red/gmx:100778218%09red/gmx:547752%09red/gmx:100803176%09red/gmx:100794084%09red/gmx:100791285%09red/gmx:100499743%09red/gmx:100781250%09red/gmx:547514%09red/gmx:100809452%09red/gmx:100811084%09red/gmx:547791%09…
Pyruvate metabolism	KEGG PATHWAY	gmx00620	53	180	6.86041e-23	7.04751e-22	Glyma.10G205500.1.p|Glyma.10G006500.1.p|Glyma.03G102900.1.p|Glyma.02G026800.1.p|Glyma.18G195900.1.p|Glyma.17G020600.1.p|Glyma.12G210600.1.p|Glyma.07G232900.1.p|Glyma.15G248500.1.p|Glyma.05G000700.2.p|Glyma.12G159300.1.p|Glyma.05G026300.1.p|Glyma.15G178400.1.p|Glyma.20G114500.2.p|Glyma.15G143100.1.p|Glyma.14G186900.2.p|Glyma.12G161300.1.p|Glyma.02G005500.1.p|Glyma.07G261400.1.p|Glyma.18G243500.1.p…	http://www.genome.jp/kegg-bin/show_pathway?gmx00620/gmx:100800280%09red/gmx:100810908%09red/gmx:547498%09red/gmx:547963%09red/gmx:100813087%09red/gmx:100793089%09red/gmx:100805001%09red/gmx:100778218%09red/gmx:100803176%09red/gmx:100804938%09red/gmx:3989306%09red/gmx:547756%09red/gmx:100797319%09red/gmx:547755%09red/gmx:100803612%09red/gmx:100781250%09red/gmx:732641%09red/gmx:100799793%09red/gmx:…
Citrate cycle (TCA cycle)	KEGG PATHWAY	gmx00020	39	104	3.22213e-20	3.03417e-19	Glyma.10G039000.1.p|Glyma.10G006500.1.p|Glyma.02G026800.1.p|Glyma.01G162800.1.p|Glyma.07G232900.1.p|Glyma.01G028900.1.p|Glyma.12G159300.1.p|Glyma.05G026300.1.p|Glyma.15G143100.1.p|Glyma.09G035600.2.p|Glyma.02G094300.1.p|Glyma.14G186900.2.p|Glyma.02G241200.1.p|Glyma.11G084000.1.p|Glyma.14G022100.1.p|Glyma.10G215400.1.p|Glyma.08G157700.1.p|Glyma.09G164900.1.p|Glyma.14G001900.1.p|Glyma.08G292800.1.p…	http://www.genome.jp/kegg-bin/show_pathway?gmx00020/gmx:100800280%09red/gmx:100527938%09red/gmx:547963%09red/gmx:100813087%09red/gmx:100805001%09red/gmx:100778218%09red/gmx:100803176%09red/gmx:100813488%09red/gmx:100786103%09red/gmx:100781250%09red/gmx:100781418%09red/gmx:100812287%09red/gmx:100819151%09red/gmx:100790110%09red/gmx:100799793%09red/gmx:100790952%09red/gmx:100778831%09red/gmx:100798…
Glutathione metabolism	KEGG PATHWAY	gmx00480	44	158	1.74666e-18	1.51825e-17	Glyma.19G077300.1.p|Glyma.06G114400.1.p|Glyma.13G135600.1.p|Glyma.19G077800.1.p|Glyma.08G014300.1.p|Glyma.02G204000.1.p|Glyma.14G177200.1.p|Glyma.04G248300.1.p|Glyma.08G013800.1.p|Glyma.08G015900.1.p|Glyma.05G240100.1.p|Glyma.19G154100.2.p|Glyma.18G137100.1.p|Glyma.15G251600.1.p|Glyma.08G020500.1.p|Glyma.12G032300.1.p|Glyma.10G047700.1.p|Glyma.08G254500.1.p|Glyma.16G155700.1.p|Glyma.05G209200.1.p…	http://www.genome.jp/kegg-bin/show_pathway?gmx00480/gmx:100810846%09red/gmx:100784258%09red/gmx:100306295%09red/gmx:100778473%09red/gmx:547597%09red/gmx:100811211%09red/gmx:100793025%09red/gmx:100792735%09red/gmx:100786103%09red/gmx:100775476%09red/gmx:100792107%09red/gmx:100802238%09red/gmx:100306590%09red/gmx:100808523%09red/gmx:100819151%09red/gmx:100803548%09red/gmx:100776863%09red/gmx:100799…
Spliceosome	KEGG PATHWAY	gmx03040	60	311	6.61521e-18	5.33942e-17	Glyma.08G245200.1.p|Glyma.13G216600.1.p|Glyma.02G247800.1.p|Glyma.09G001000.1.p|Glyma.05G117600.1.p|Glyma.10G165900.1.p|Glyma.11G237500.3.p|Glyma.01G227300.1.p|Glyma.15G005900.1.p|Glyma.10G123200.1.p|Glyma.03G143400.1.p|Glyma.12G064000.1.p|Glyma.02G155300.1.p|Glyma.17G004800.1.p|Glyma.18G266500.1.p|Glyma.14G136700.1.p|Glyma.03G253300.1.p|Glyma.02G082300.1.p|Glyma.03G109200.1.p|Glyma.02G220800.1.p…	http://www.genome.jp/kegg-bin/show_pathway?gmx03040/gmx:100816245%09red/gmx:100779321%09red/gmx:100305969%09red/gmx:100818300%09red/gmx:100801352%09red/gmx:100811622%09red/gmx:100777767%09red/gmx:100527187%09red/gmx:100812698%09red/gmx:100783362%09red/gmx:100786807%09red/gmx:100778595%09red/gmx:100791039%09red/gmx:100815224%09red/gmx:100775785%09red/gmx:100797765%09red/gmx:100805822%09red/gmx:100…
Pentose phosphate pathway	KEGG PATHWAY	gmx00030	37	114	1.44736e-17	1.09035e-16	Glyma.07G182300.1.p|Glyma.19G077300.1.p|Glyma.18G193600.1.p|Glyma.14G010900.1.p|Glyma.05G056400.1.p|Glyma.07G142700.1.p|Glyma.04G231600.1.p|Glyma.20G007400.1.p|Glyma.02G202500.1.p|Glyma.15G136200.1.p|Glyma.17G101700.2.p|Glyma.08G020500.1.p|Glyma.10G293500.1.p|Glyma.19G088400.1.p|Glyma.08G044100.1.p|Glyma.20G243500.1.p|Glyma.08G254500.1.p|Glyma.05G199800.1.p|Glyma.03G027500.1.p|Glyma.07G126400.1.p…	http://www.genome.jp/kegg-bin/show_pathway?gmx00030/gmx:100780041%09red/gmx:100780166%09red/gmx:100818028%09red/gmx:100792666%09red/gmx:100811673%09red/gmx:100791285%09red/gmx:100805786%09red/gmx:100789900%09red/gmx:100809452%09red/gmx:100799034%09red/gmx:100798677%09red/gmx:100789100%09red/gmx:100794539%09red/gmx:100796103%09red/gmx:100799873%09red/gmx:100783936%09red/gmx:100807451%09red/gmx:100…
2-Oxocarboxylic acid metabolism	KEGG PATHWAY	gmx01210	34	94	1.98978e-17	1.40528e-16	Glyma.17G216000.2.p|Glyma.11G084000.1.p|Glyma.11G043300.1.p|Glyma.15G005400.1.p|Glyma.12G122900.1.p|Glyma.15G072500.1.p|Glyma.02G038100.2.p|Glyma.01G026700.1.p|Glyma.20G009400.1.p|Glyma.02G241200.1.p|Glyma.06G082400.1.p|Glyma.13G131900.1.p|Glyma.06G275700.1.p|Glyma.14G111800.1.p|Glyma.08G157700.1.p|Glyma.14G001900.1.p|Glyma.11G045300.1.p|Glyma.17G256100.1.p|Glyma.06G074900.1.p|Glyma.05G167700.1.p…	http://www.genome.jp/kegg-bin/show_pathway?gmx01210/gmx:100786103%09red/gmx:100793061%09red/gmx:100811326%09red/gmx:100127415%09red/gmx:100801527%09red/gmx:100819151%09red/gmx:100790110%09red/gmx:100780547%09red/gmx:100811514%09red/gmx:100798328%09red/gmx:100806689%09red/gmx:100778831%09red/gmx:100776235%09red/gmx:100781418%09red/gmx:100814183%09red/gmx:100779210%09red/gmx:100810468%09red/gmx:100…
Glycine, serine and threonine metabolism	KEGG PATHWAY	gmx00260	36	123	5.8826e-16	3.9102e-15	Glyma.15G012500.1.p|Glyma.20G129400.1.p|Glyma.07G232900.1.p|Glyma.02G038100.2.p|Glyma.13G049500.1.p|Glyma.08G302600.1.p|Glyma.01G026700.1.p|Glyma.15G178400.1.p|Glyma.05G033500.1.p|Glyma.20G019600.1.p|Glyma.18G116900.1.p|Glyma.05G151100.1.p|Glyma.12G085900.1.p|Glyma.14G094700.1.p|Glyma.05G240700.1.p|Glyma.10G281400.1.p|Glyma.07G262100.2.p|Glyma.17G012000.1.p|Glyma.08G282800.1.p|Glyma.20G107800.1.p…	http://www.genome.jp/kegg-bin/show_pathway?gmx00260/gmx:100779623%09red/gmx:100809241%09red/gmx:100803176%09red/gmx:100794084%09red/gmx:100793061%09red/gmx:100127415%09red/gmx:100802258%09red/gmx:548099%09red/gmx:100811186%09red/gmx:100812202%09red/gmx:547640%09red/gmx:100820573%09red/gmx:100499635%09red/gmx:100787173%09red/gmx:100778188%09red/gmx:100779355%09red/gmx:100305380%09red/gmx:100819714…
Photosynthesis - antenna proteins	KEGG PATHWAY	gmx00196	22	34	8.96462e-16	5.62779e-15	Glyma.20G212900.1.p|Glyma.08G082900.1.p|Glyma.03G262300.1.p|Glyma.05G128000.1.p|Glyma.16G165200.1.p|Glyma.03G060300.1.p|Glyma.01G115900.1.p|Glyma.02G064700.1.p|Glyma.11G228800.1.p|Glyma.09G071400.1.p|Glyma.16G165800.1.p|Glyma.04G167900.1.p|Glyma.08G074000.1.p|Glyma.06G194900.1.p|Glyma.12G219300.1.p|Glyma.15G052400.2.p|Glyma.18G028400.2.p|Glyma.07G047600.1.p|Glyma.02G305400.1.p|Glyma.08G180000.1.p…	http://www.genome.jp/kegg-bin/show_pathway?gmx00196/gmx:547819%09red/gmx:100800374%09red/gmx:100798548%09red/gmx:100784089%09red/gmx:100817348%09red/gmx:100779387%09red/gmx:100793702%09red/gmx:100820335%09red/gmx:100802922%09red/gmx:100800350%09red/gmx:100800351%09red/gmx:100783223%09red/gmx:100500118%09red/gmx:100805310%09red/gmx:100785415%09red/gmx:100785180%09red/gmx:100794944%09red/gmx:100794…
Porphyrin and chlorophyll metabolism	KEGG PATHWAY	gmx00860	29	85	1.51771e-14	9.02637e-14	Glyma.07G152300.1.p|Glyma.11G094700.1.p|Glyma.04G002900.1.p|Glyma.12G021100.1.p|Glyma.14G003200.1.p|Glyma.12G222200.1.p|Glyma.08G007900.1.p|Glyma.03G097900.1.p|Glyma.05G200500.3.p|Glyma.02G218300.1.p|Glyma.04G247700.1.p|Glyma.15G097700.1.p|Glyma.02G301700.1.p|Glyma.18G021500.1.p|Glyma.10G138600.1.p|Glyma.01G227400.1.p|Glyma.03G119500.1.p|Glyma.13G171800.1.p|Glyma.13G215400.1.p|Glyma.12G229700.1.p…	http://www.genome.jp/kegg-bin/show_pathway?gmx00860/gmx:100817154%09red/gmx:547612%09red/gmx:100784256%09red/gmx:100810730%09red/gmx:100817017%09red/gmx:100787459%09red/gmx:100800753%09red/gmx:100810190%09red/gmx:100801560%09red/gmx:100785637%09red/gmx:547795%09red/gmx:100779132%09red/gmx:548043%09red/gmx:100780934%09red/gmx:100812733%09red/gmx:100819951%09red/gmx:100808086%09red/gmx:100819913%09…
Protein processing in endoplasmic reticulum	KEGG PATHWAY	gmx04141	59	375	3.85461e-14	2.17786e-13	Glyma.13G216600.1.p|Glyma.10G014700.1.p|Glyma.12G045400.1.p|Glyma.11G084700.2.p|Glyma.12G172800.1.p|Glyma.06G114800.1.p|Glyma.01G103200.1.p|Glyma.02G266900.1.p|Glyma.10G147600.2.p|Glyma.12G010300.2.p|Glyma.01G068000.1.p|Glyma.04G202900.1.p|Glyma.12G177100.1.p|Glyma.02G014000.3.p|Glyma.20G098400.1.p|Glyma.14G050600.1.p|Glyma.01G081500.1.p|Glyma.02G270000.1.p|Glyma.04G199200.2.p|Glyma.13G328300.1.p…	http://www.genome.jp/kegg-bin/show_pathway?gmx04141/gmx:100810637%09red/gmx:100806710%09red/gmx:100785017%09red/gmx:100820543%09red/gmx:100815670%09red/gmx:100526845%09red/gmx:100777767%09red/gmx:100780421%09red/gmx:100499727%09red/gmx:100790223%09red/gmx:100802236%09red/gmx:100499741%09red/gmx:100779976%09red/gmx:100811253%09red/gmx:100527683%09red/gmx:100810595%09red/gmx:100786898%09red/gmx:100…
Cysteine and methionine metabolism	KEGG PATHWAY	gmx00270	41	195	9.14766e-14	4.92231e-13	Glyma.10G006500.1.p|Glyma.19G242300.1.p|Glyma.10G244300.1.p|Glyma.02G138400.1.p|Glyma.09G235400.1.p|Glyma.17G216000.2.p|Glyma.12G159300.1.p|Glyma.05G026300.1.p|Glyma.16G038300.1.p|Glyma.07G206800.1.p|Glyma.06G082400.1.p|Glyma.05G151100.1.p|Glyma.12G225300.1.p|Glyma.05G240700.1.p|Glyma.03G244800.2.p|Glyma.06G275700.1.p|Glyma.14G111800.1.p|Glyma.10G244100.1.p|Glyma.08G167100.1.p|Glyma.11G045300.1.p…	http://www.genome.jp/kegg-bin/show_pathway?gmx00270/gmx:100814810%09red/gmx:100812492%09red/gmx:100792107%09red/gmx:547963%09red/gmx:100794958%09red/gmx:100787994%09red/gmx:100793061%09red/gmx:100820392%09red/gmx:732641%09red/gmx:100806420%09red/gmx:547792%09red/gmx:100778473%09red/gmx:100811514%09red/gmx:100798328%09red/gmx:100811211%09red/gmx:100500592%09red/gmx:548023%09red/gmx:100796209%09red…
Alanine, aspartate and glutamate metabolism	KEGG PATHWAY	gmx00250	29	95	1.58675e-13	8.15011e-13	Glyma.05G236000.1.p|Glyma.14G195000.1.p|Glyma.17G216000.2.p|Glyma.02G038100.2.p|Glyma.08G302600.1.p|Glyma.01G026700.1.p|Glyma.16G041200.1.p|Glyma.16G218500.1.p|Glyma.06G150000.1.p|Glyma.11G096200.1.p|Glyma.15G045100.1.p|Glyma.06G275700.1.p|Glyma.14G111800.1.p|Glyma.04G216000.1.p|Glyma.11G215500.1.p|Glyma.13G328600.1.p|Glyma.02G228100.1.p|Glyma.06G096700.1.p|Glyma.12G036200.1.p|Glyma.07G045900.1.p…	http://www.genome.jp/kegg-bin/show_pathway?gmx00250/gmx:100811618%09red/gmx:100792329%09red/gmx:100776235%09red/gmx:100788470%09red/gmx:100127415%09red/gmx:100817195%09red/gmx:547792%09red/gmx:100811514%09red/gmx:100780873%09red/gmx:547894%09red/gmx:547953%09red/gmx:100808318%09red/gmx:547724%09red/gmx:547813%09red/gmx:547509%09red/gmx:100797022%09red/gmx:732565%09red/gmx:100806168%09red/gmx:1007…
Arginine biosynthesis	KEGG PATHWAY	gmx00220	23	59	8.31964e-13	4.08748e-12	Glyma.05G236000.1.p|Glyma.17G216000.2.p|Glyma.11G043300.1.p|Glyma.02G038100.2.p|Glyma.01G026700.1.p|Glyma.01G140200.1.p|Glyma.20G009400.1.p|Glyma.16G041200.1.p|Glyma.06G082400.1.p|Glyma.13G131900.1.p|Glyma.06G275700.1.p|Glyma.14G111800.1.p|Glyma.03G028000.1.p|Glyma.11G215500.1.p|Glyma.06G096700.1.p|Glyma.07G118300.1.p|Glyma.07G045900.1.p|Glyma.07G179700.1.p|Glyma.06G074900.1.p|Glyma.13G210800.2.p…	http://www.genome.jp/kegg-bin/show_pathway?gmx00220/gmx:100776235%09red/gmx:100127415%09red/gmx:100801527%09red/gmx:547792%09red/gmx:100811514%09red/gmx:100775828%09red/gmx:547994%09red/gmx:100780873%09red/gmx:547953%09red/gmx:100814183%09red/gmx:100789799%09red/gmx:547813%09red/gmx:547509%09red/gmx:100814676%09red/gmx:100809547%09red/gmx:100787173%09red/gmx:100788347%09red/gmx:100783172%09red/gm…
RNA transport	KEGG PATHWAY	gmx03013	45	272	8.87346e-12	4.17792e-11	Glyma.02G236700.1.p|Glyma.11G237500.3.p|Glyma.01G227300.1.p|Glyma.08G025600.1.p|Glyma.04G233700.1.p|Glyma.02G205500.1.p|Glyma.01G029600.1.p|Glyma.08G172000.1.p|Glyma.03G172200.2.p|Glyma.07G060900.1.p|Glyma.10G026700.1.p|Glyma.20G143300.1.p|Glyma.02G103900.1.p|Glyma.15G026100.1.p|Glyma.03G109200.1.p|Glyma.10G250400.1.p|Glyma.02G097300.1.p|Glyma.11G141500.2.p|Glyma.18G165200.1.p|Glyma.15G158800.1.p…	http://www.genome.jp/kegg-bin/show_pathway?gmx03013/gmx:100816245%09red/gmx:100785130%09red/gmx:100778595%09red/gmx:100802805%09red/gmx:100817394%09red/gmx:100527187%09red/gmx:100791863%09red/gmx:100781275%09red/gmx:100526922%09red/gmx:100783362%09red/gmx:100777906%09red/gmx:100783618%09red/gmx:100777129%09red/gmx:100785429%09red/gmx:100795339%09red/gmx:100789296%09red/gmx:100817317%09red/gmx:100…
Fructose and mannose metabolism	KEGG PATHWAY	gmx00051	30	129	2.15602e-11	9.74521e-11	Glyma.07G182300.1.p|Glyma.02G228700.1.p|Glyma.18G193600.1.p|Glyma.14G010900.1.p|Glyma.07G142700.1.p|Glyma.02G250800.1.p|Glyma.20G007400.1.p|Glyma.12G037400.1.p|Glyma.19G186000.1.p|Glyma.02G245800.1.p|Glyma.16G199200.1.p|Glyma.01G024800.1.p|Glyma.07G126400.1.p|Glyma.11G127200.1.p|Glyma.12G036700.1.p|Glyma.13G336200.1.p|Glyma.01G167500.1.p|Glyma.03G185800.1.p|Glyma.02G303000.1.p|Glyma.10G194300.1.p…	http://www.genome.jp/kegg-bin/show_pathway?gmx00051/gmx:100819824%09red/gmx:100804624%09red/gmx:100777692%09red/gmx:100820630%09red/gmx:100806500%09red/gmx:100780082%09red/gmx:100798990%09red/gmx:100799358%09red/gmx:100798677%09red/gmx:100794539%09red/gmx:100799873%09red/gmx:100807451%09red/gmx:100787923%09red/gmx:100775844%09red/gmx:100808375%09red/gmx:547761%09red/gmx:100786385%09red/gmx:100792…
Ascorbate and aldarate metabolism	KEGG PATHWAY	gmx00053	21	74	1.03612e-09	4.50315e-09	Glyma.10G067500.1.p|Glyma.15G115500.1.p|Glyma.06G114400.1.p|Glyma.04G009800.1.p|Glyma.12G032300.1.p|Glyma.08G064100.1.p|Glyma.06G183900.1.p|Glyma.10G104100.1.p|Glyma.06G068200.1.p|Glyma.08G017800.1.p|Glyma.11G209100.1.p|Glyma.02G209000.1.p|Glyma.10G162000.1.p|Glyma.14G177200.1.p|Glyma.08G002700.1.p|Glyma.12G073100.1.p|Glyma.08G243000.1.p|Glyma.04G248300.1.p|Glyma.03G247000.1.p|Glyma.15G178400.1.p…	http://www.genome.jp/kegg-bin/show_pathway?gmx00053/gmx:100811501%09red/gmx:100500084%09red/gmx:100784258%09red/gmx:100794772%09red/gmx:100799504%09red/gmx:100817591%09red/gmx:100819919%09red/gmx:100527811%09red/gmx:100809400%09red/gmx:100792735%09red/gmx:100170727%09red/gmx:100800699%09red/gmx:606508%09red/gmx:548074%09red/gmx:100802238%09red/gmx:100795192%09red/gmx:100811186%09red/gmx:100793515…
Peroxisome	KEGG PATHWAY	gmx04146	29	150	1.95378e-09	8.17691e-09	Glyma.19G240400.1.p|Glyma.08G175800.1.p|Glyma.04G221300.1.p|Glyma.17G009400.1.p|Glyma.13G280600.1.p|Glyma.04G017500.1.p|Glyma.08G302600.1.p|Glyma.03G242900.2.p|Glyma.02G241200.1.p|Glyma.06G144500.1.p|Glyma.02G087700.1.p|Glyma.15G250800.1.p|Glyma.20G143900.1.p|Glyma.11G035200.1.p|Glyma.05G059400.1.p|Glyma.20G050800.1.p|Glyma.17G141800.1.p|Glyma.10G124700.1.p|Glyma.05G005300.1.p|Glyma.20G196900.1.p…	http://www.genome.jp/kegg-bin/show_pathway?gmx04146/gmx:547823%09red/gmx:100786103%09red/gmx:547511%09red/gmx:100499991%09red/gmx:100786706%09red/gmx:100819151%09red/gmx:547531%09red/gmx:100170726%09red/gmx:100500051%09red/gmx:100305732%09red/gmx:100780008%09red/gmx:100037448%09red/gmx:100814802%09red/gmx:100778673%09red/gmx:100527058%09red/gmx:100789930%09red/gmx:547625%09red/gmx:100777153%09red…
Proteasome	KEGG PATHWAY	gmx03050	24	105	2.81488e-09	1.13601e-08	Glyma.10G043000.1.p|Glyma.05G079000.2.p|Glyma.03G073300.2.p|Glyma.17G127100.1.p|Glyma.08G048800.1.p|Glyma.05G241500.1.p|Glyma.16G126200.1.p|Glyma.18G206200.1.p|Glyma.14G014800.5.p|Glyma.03G262800.1.p|Glyma.10G295600.1.p|Glyma.14G073000.1.p|Glyma.10G151900.1.p|Glyma.04G194700.3.p|Glyma.04G077400.1.p|Glyma.08G167600.1.p|Glyma.18G138900.1.p|Glyma.19G072100.1.p|Glyma.04G029400.1.p|Glyma.20G109600.1.p…	http://www.genome.jp/kegg-bin/show_pathway?gmx03050/gmx:100793551%09red/gmx:100778498%09red/gmx:100792921%09red/gmx:100790425%09red/gmx:100808133%09red/gmx:100807110%09red/gmx:100794489%09red/gmx:100817941%09red/gmx:100788486%09red/gmx:100799919%09red/gmx:100790481%09red/gmx:100306148%09red/gmx:100803124%09red/gmx:100812783%09red/gmx:100499738%09red/gmx:100793480%09red/gmx:100820387%09red/gmx:100…
Fatty acid biosynthesis	KEGG PATHWAY	gmx00061	20	79	1.33386e-08	5.19745e-08	Glyma.18G243500.1.p|Glyma.05G221100.1.p|Glyma.11G101400.1.p|Glyma.13G112700.2.p|Glyma.15G052500.1.p|Glyma.18G195900.1.p|Glyma.08G349200.1.p|Glyma.18G057700.1.p|Glyma.20G143900.1.p|Glyma.07G207200.1.p|Glyma.09G277400.1.p|Glyma.18G009200.1.p|Glyma.12G027300.1.p|Glyma.15G248500.1.p|Glyma.09G248900.1.p|Glyma.05G129600.1.p|Glyma.18G196000.1.p|Glyma.08G084300.1.p|Glyma.16G042000.1.p|Glyma.11G248000.1.p	http://www.genome.jp/kegg-bin/show_pathway?gmx00061/gmx:547575%09red/gmx:100217331%09red/gmx:548028%09red/gmx:100809809%09red/gmx:100817945%09red/gmx:100809416%09red/gmx:100806814%09red/gmx:548072%09red/gmx:100813007%09red/gmx:732644%09red/gmx:3989306%09red/gmx:100301904%09red/gmx:100785606%09red/gmx:100037449%09red/gmx:100037453%09red/gmx:100777266%09red/gmx:100037462%09red/gmx:100795986%09red/g…
Fatty acid metabolism	KEGG PATHWAY	gmx01212	24	124	4.58298e-08	1.72626e-07	Glyma.11G101400.1.p|Glyma.18G195900.1.p|Glyma.15G248500.1.p|Glyma.11G035200.1.p|Glyma.20G143900.1.p|Glyma.07G207200.1.p|Glyma.18G243500.1.p|Glyma.18G009200.1.p|Glyma.12G027300.1.p|Glyma.05G129600.1.p|Glyma.18G196000.1.p|Glyma.08G084300.1.p|Glyma.10G124700.1.p|Glyma.05G221100.1.p|Glyma.14G004600.1.p|Glyma.18G057700.1.p|Glyma.13G112700.2.p|Glyma.07G246300.1.p|Glyma.09G277400.1.p|Glyma.15G052500.1.p…	http://www.genome.jp/kegg-bin/show_pathway?gmx01212/gmx:100217331%09red/gmx:547498%09red/gmx:100806814%09red/gmx:3989306%09red/gmx:732644%09red/gmx:548028%09red/gmx:100809416%09red/gmx:100817945%09red/gmx:547575%09red/gmx:100777319%09red/gmx:100037462%09red/gmx:100037449%09red/gmx:100778244%09red/gmx:100776777%09red/gmx:100809809%09red/gmx:100789930%09red/gmx:547625%09red/gmx:100785606%09red/gmx:…
Phenylalanine, tyrosine and tryptophan biosynthesis	KEGG PATHWAY	gmx00400	18	71	6.86817e-08	2.50356e-07	Glyma.05G181000.1.p|Glyma.20G179500.1.p|Glyma.19G160800.1.p|Glyma.19G027100.1.p|Glyma.01G082200.1.p|Glyma.06G082400.1.p|Glyma.17G216000.2.p|Glyma.02G073000.1.p|Glyma.06G275700.1.p|Glyma.11G078700.1.p|Glyma.08G312300.1.p|Glyma.14G111800.1.p|Glyma.04G184900.1.p|Glyma.20G103200.1.p|Glyma.13G049500.1.p|Glyma.01G164300.1.p|Glyma.17G222700.1.p|Glyma.15G054700.1.p	http://www.genome.jp/kegg-bin/show_pathway?gmx00400/gmx:732610%09red/gmx:100783691%09red/gmx:547792%09red/gmx:100802258%09red/gmx:100811514%09red/gmx:100793028%09red/gmx:100806628%09red/gmx:100814518%09red/gmx:100811217%09red/gmx:100801361%09red/gmx:100789764%09red/gmx:100808361%09red/gmx:547813%09red/gmx:100792812%09red/gmx:547509%09red/gmx:100794615%09red/gmx:100812989%09red/gmx:100526928%09red
Sulfur metabolism	KEGG PATHWAY	gmx00920	17	63	7.34818e-08	2.59482e-07	Glyma.15G108700.1.p|Glyma.12G019400.1.p|Glyma.07G206800.1.p|Glyma.13G261400.1.p|Glyma.02G138400.1.p|Glyma.09G235400.1.p|Glyma.09G004400.1.p|Glyma.03G244800.2.p|Glyma.19G242300.1.p|Glyma.08G167100.1.p|Glyma.09G258000.1.p|Glyma.10G242600.1.p|Glyma.13G051000.1.p|Glyma.09G246700.1.p|Glyma.11G005800.3.p|Glyma.08G086800.1.p|Glyma.11G093200.1.p	http://www.genome.jp/kegg-bin/show_pathway?gmx00920/gmx:547693%09red/gmx:100101865%09red/gmx:100806420%09red/gmx:100101900%09red/gmx:100798053%09red/gmx:100817415%09red/gmx:100780846%09red/gmx:100805275%09red/gmx:100794958%09red/gmx:100799978%09red/gmx:100815330%09red/gmx:547631%09red/gmx:547630%09red/gmx:548023%09red/gmx:100817799%09red/gmx:100790764%09red/gmx:547634%09red
Aminoacyl-tRNA biosynthesis	KEGG PATHWAY	gmx00970	25	140	9.57993e-08	3.2804e-07	Glyma.12G043200.1.p|Glyma.08G311400.1.p|Glyma.03G183400.1.p|Glyma.11G102100.1.p|Glyma.19G191200.1.p|Glyma.10G214200.3.p|Glyma.04G086500.1.p|Glyma.01G006100.1.p|Glyma.03G097900.1.p|Glyma.18G291800.1.p|Glyma.05G236700.1.p|Glyma.01G032500.1.p|Glyma.08G031100.1.p|Glyma.05G059500.1.p|Glyma.08G363700.1.p|Glyma.06G001100.1.p|Glyma.02G234500.1.p|Glyma.03G109000.1.p|Glyma.09G133200.1.p|Glyma.14G101500.1.p…	http://www.genome.jp/kegg-bin/show_pathway?gmx00970/gmx:100788164%09red/gmx:100793186%09red/gmx:100810476%09red/gmx:100810730%09red/gmx:100813162%09red/gmx:100809150%09red/gmx:100776622%09red/gmx:100798000%09red/gmx:100777060%09red/gmx:100781232%09red/gmx:100784904%09red/gmx:100804064%09red/gmx:100801732%09red/gmx:100812652%09red/gmx:100796303%09red/gmx:100813016%09red/gmx:100817906%09red/gmx:100…
Propanoate metabolism	KEGG PATHWAY	gmx00640	15	56	4.6084e-07	1.53162e-06	Glyma.05G221100.1.p|Glyma.13G125400.1.p|Glyma.18G195900.1.p|Glyma.14G004600.1.p|Glyma.10G039000.1.p|Glyma.17G140600.2.p|Glyma.08G040000.1.p|Glyma.18G243500.1.p|Glyma.17G037900.1.p|Glyma.07G232900.1.p|Glyma.15G248500.1.p|Glyma.09G248900.1.p|Glyma.09G164900.1.p|Glyma.15G143100.1.p|Glyma.18G196000.1.p	http://www.genome.jp/kegg-bin/show_pathway?gmx00640/gmx:100527938%09red/gmx:100782001%09red/gmx:547498%09red/gmx:547523%09red/gmx:100776777%09red/gmx:100788043%09red/gmx:100813160%09red/gmx:548072%09red/gmx:100803176%09red/gmx:100790952%09red/gmx:3989306%09red/gmx:100803035%09red/gmx:100037462%09red/gmx:100037449%09red/gmx:100778244%09red
Amino sugar and nucleotide sugar metabolism	KEGG PATHWAY	gmx00520	34	266	7.51633e-07	2.4267e-06	Glyma.02G241100.1.p|Glyma.02G304500.2.p|Glyma.19G124500.1.p|Glyma.02G250800.1.p|Glyma.11G127200.1.p|Glyma.14G210700.1.p|Glyma.13G152500.1.p|Glyma.12G064600.3.p|Glyma.12G084100.1.p|Glyma.08G180900.1.p|Glyma.02G245800.1.p|Glyma.18G286200.1.p|Glyma.08G044100.1.p|Glyma.12G180300.1.p|Glyma.10G162000.1.p|Glyma.01G063000.1.p|Glyma.04G092400.1.p|Glyma.17G132500.1.p|Glyma.05G008100.1.p|Glyma.10G241000.1.p…	http://www.genome.jp/kegg-bin/show_pathway?gmx00520/gmx:102667779%09red/gmx:100783948%09red/gmx:100782830%09red/gmx:100814818%09red/gmx:100780166%09red/gmx:100792948%09red/gmx:100775641%09red/gmx:100791285%09red/gmx:100777692%09red/gmx:100794066%09red/gmx:100809452%09red/gmx:100809983%09red/gmx:100790112%09red/gmx:100781191%09red/gmx:100780082%09red/gmx:100781643%09red/gmx:100788017%09red/gmx:100…
Lysine biosynthesis	KEGG PATHWAY	gmx00300	10	22	8.0998e-07	2.54244e-06	Glyma.19G174300.1.p|Glyma.05G151100.1.p|Glyma.08G047800.1.p|Glyma.07G060300.1.p|Glyma.03G181200.1.p|Glyma.05G240700.1.p|Glyma.09G268200.1.p|Glyma.16G028900.1.p|Glyma.03G173400.1.p|Glyma.15G178400.1.p	http://www.genome.jp/kegg-bin/show_pathway?gmx00300/gmx:100814757%09red/gmx:100807997%09red/gmx:100786832%09red/gmx:100819889%09red/gmx:100784731%09red/gmx:100793061%09red/gmx:100788930%09red/gmx:100807528%09red/gmx:100811186%09red/gmx:100812202%09red
Butanoate metabolism	KEGG PATHWAY	gmx00650	12	37	1.21074e-06	3.69768e-06	Glyma.17G132300.1.p|Glyma.16G218500.1.p|Glyma.18G043600.1.p|Glyma.13G349100.1.p|Glyma.16G028700.1.p|Glyma.14G004600.1.p|Glyma.11G096200.1.p|Glyma.19G128600.3.p|Glyma.05G167700.1.p|Glyma.07G059800.1.p|Glyma.15G072500.1.p|Glyma.15G263500.1.p	http://www.genome.jp/kegg-bin/show_pathway?gmx00650/gmx:100779210%09red/gmx:100781928%09red/gmx:100783047%09red/gmx:100783934%09red/gmx:100776777%09red/gmx:100808318%09red/gmx:100815181%09red/gmx:547724%09red/gmx:100802847%09red/gmx:100817216%09red/gmx:100801507%09red/gmx:100780554%09red
Phagosome	KEGG PATHWAY	gmx04145	25	165	1.44827e-06	4.3067e-06	Glyma.03G180700.1.p|Glyma.08G020300.1.p|Glyma.20G098400.1.p|Glyma.09G245700.1.p|Glyma.02G059800.1.p|Glyma.11G113400.1.p|Glyma.07G023400.1.p|Glyma.05G207500.1.p|Glyma.08G006500.1.p|Glyma.19G113000.1.p|Glyma.05G110200.1.p|Glyma.18G256200.1.p|Glyma.01G109300.1.p|Glyma.08G115100.1.p|Glyma.05G135300.2.p|Glyma.08G081100.1.p|Glyma.01G015600.1.p|Glyma.08G224400.1.p|Glyma.06G162600.1.p|Glyma.10G235100.1.p…	http://www.genome.jp/kegg-bin/show_pathway?gmx04145/gmx:100788253%09red/gmx:100798849%09red/gmx:100810595%09red/gmx:100816898%09red/gmx:100775727%09red/gmx:100797652%09red/gmx:100802236%09red/gmx:100783125%09red/gmx:100800553%09red/gmx:100811997%09red/gmx:100305531%09red/gmx:100814088%09red/gmx:547851%09red/gmx:100305477%09red/gmx:732582%09red/gmx:100801608%09red/gmx:100785901%09red/gmx:100795235…
Nitrogen metabolism	KEGG PATHWAY	gmx00910	15	64	1.94023e-06	5.6217e-06	Glyma.07G212800.2.p|Glyma.14G165000.1.p|Glyma.01G030500.1.p|Glyma.03G128300.2.p|Glyma.16G041200.1.p|Glyma.02G035000.1.p|Glyma.13G210800.2.p|Glyma.06G109200.1.p|Glyma.14G164900.1.p|Glyma.05G007100.1.p|Glyma.02G132100.1.p|Glyma.15G102000.2.p|Glyma.11G215500.1.p|Glyma.10G005200.1.p|Glyma.19G007700.1.p	http://www.genome.jp/kegg-bin/show_pathway?gmx00910/gmx:100781868%09red/gmx:100818642%09red/gmx:548016%09red/gmx:100810496%09red/gmx:100780873%09red/gmx:547687%09red/gmx:100775519%09red/gmx:100803945%09red/gmx:100305967%09red/gmx:100818103%09red/gmx:732631%09red/gmx:547953%09red/gmx:732634%09red
Monobactam biosynthesis	KEGG PATHWAY	gmx00261	8	15	4.19925e-06	1.18629e-05	Glyma.05G151100.1.p|Glyma.08G047800.1.p|Glyma.05G240700.1.p|Glyma.09G268200.1.p|Glyma.16G028900.1.p|Glyma.07G060300.1.p|Glyma.10G242600.1.p|Glyma.13G051000.1.p	http://www.genome.jp/kegg-bin/show_pathway?gmx00261/gmx:100814757%09red/gmx:100807997%09red/gmx:100805275%09red/gmx:100819889%09red/gmx:100793061%09red/gmx:547634%09red/gmx:100788930%09red/gmx:100812202%09red
C5-Branched dibasic acid metabolism	KEGG PATHWAY	gmx00660	7	13	1.62887e-05	4.48932e-05	Glyma.05G167700.1.p|Glyma.11G079000.1.p|Glyma.15G005400.1.p|Glyma.17G256100.1.p|Glyma.07G032200.1.p|Glyma.15G072500.1.p|Glyma.08G210500.1.p	http://www.genome.jp/kegg-bin/show_pathway?gmx00660/gmx:100779210%09red/gmx:100782688%09red/gmx:100780547%09red/gmx:100783934%09red/gmx:100809737%09red/gmx:100807689%09red/gmx:100810468%09red
Biotin metabolism	KEGG PATHWAY	gmx00780	9	27	2.19047e-05	5.77088e-05	Glyma.11G101400.1.p|Glyma.13G112700.2.p|Glyma.18G009200.1.p|Glyma.15G052500.1.p|Glyma.12G027300.1.p|Glyma.05G129600.1.p|Glyma.08G084300.1.p|Glyma.16G042000.1.p|Glyma.11G248000.1.p	http://www.genome.jp/kegg-bin/show_pathway?gmx00780/gmx:548028%09red/gmx:100809809%09red/gmx:100817945%09red/gmx:100809416%09red/gmx:100806814%09red/gmx:100037453%09red/gmx:100785606%09red/gmx:547575%09red/gmx:100777266%09red
Terpenoid backbone biosynthesis	KEGG PATHWAY	gmx00900	16	91	2.196e-05	5.77088e-05	Glyma.11G021400.1.p|Glyma.16G089000.1.p|Glyma.17G002400.1.p|Glyma.17G132300.1.p|Glyma.08G093400.1.p|Glyma.09G015600.1.p|Glyma.15G243100.1.p|Glyma.14G004600.1.p|Glyma.11G120900.1.p|Glyma.17G089600.1.p|Glyma.13G262200.1.p|Glyma.13G326400.2.p|Glyma.12G046000.1.p|Glyma.05G037500.1.p|Glyma.13G072700.1.p|Glyma.16G141700.1.p	http://www.genome.jp/kegg-bin/show_pathway?gmx00900/gmx:100805316%09red/gmx:100780554%09red/gmx:100776777%09red/gmx:100801743%09red/gmx:100817632%09red/gmx:100788186%09red/gmx:100779074%09red/gmx:100306378%09red/gmx:100805941%09red/gmx:100790607%09red/gmx:100818067%09red/gmx:100802347%09red/gmx:100784845%09red/gmx:100805842%09red/gmx:100783538%09red/gmx:100785539%09red
One carbon pool by folate	KEGG PATHWAY	gmx00670	10	36	2.88902e-05	7.41952e-05	Glyma.06G325300.1.p|Glyma.18G150000.1.p|Glyma.16G164900.5.p|Glyma.08G108900.2.p|Glyma.13G222300.1.p|Glyma.07G262100.2.p|Glyma.08G274400.1.p|Glyma.05G001000.1.p|Glyma.20G243700.1.p|Glyma.17G012000.1.p	http://www.genome.jp/kegg-bin/show_pathway?gmx00670/gmx:100797489%09red/gmx:100499635%09red/gmx:100778188%09red/gmx:100305381%09red/gmx:100305380%09red/gmx:100809241%09red/gmx:100798000%09red/gmx:100797707%09red/gmx:100806844%09red
Valine, leucine and isoleucine biosynthesis	KEGG PATHWAY	gmx00290	10	37	3.5234e-05	8.84765e-05	Glyma.11G045300.1.p|Glyma.13G207900.1.p|Glyma.15G005400.1.p|Glyma.17G256100.1.p|Glyma.07G032200.1.p|Glyma.12G122900.1.p|Glyma.05G167700.1.p|Glyma.15G072500.1.p|Glyma.11G079000.1.p|Glyma.08G210500.1.p	http://www.genome.jp/kegg-bin/show_pathway?gmx00290/gmx:100779210%09red/gmx:100782688%09red/gmx:100810468%09red/gmx:100783934%09red/gmx:100798328%09red/gmx:100806689%09red/gmx:100809737%09red/gmx:100789879%09red/gmx:100807689%09red/gmx:100780547%09red
Selenocompound metabolism	KEGG PATHWAY	gmx00450	9	31	5.41387e-05	0.000132993	Glyma.11G088200.1.p|Glyma.13G028400.1.p|Glyma.09G235400.1.p|Glyma.10G113100.1.p|Glyma.19G114500.2.p|Glyma.10G242600.1.p|Glyma.13G051000.1.p|Glyma.02G185300.1.p|Glyma.16G038300.1.p	http://www.genome.jp/kegg-bin/show_pathway?gmx00450/gmx:547643%09red/gmx:100794561%09red/gmx:100805275%09red/gmx:100819254%09red/gmx:548023%09red/gmx:100802039%09red/gmx:100790557%09red/gmx:547634%09red/gmx:100779947%09red
Purine metabolism	KEGG PATHWAY	gmx00230	30	284	8.66574e-05	0.000208346	Glyma.05G066500.1.p|Glyma.10G156900.1.p|Glyma.04G045000.1.p|Glyma.09G096800.1.p|Glyma.10G184900.1.p|Glyma.05G000700.2.p|Glyma.10G241000.1.p|Glyma.09G234300.1.p|Glyma.17G127400.1.p|Glyma.08G044100.1.p|Glyma.17G128300.1.p|Glyma.13G144800.1.p|Glyma.13G240600.1.p|Glyma.13G051000.1.p|Glyma.11G221100.1.p|Glyma.16G043400.1.p|Glyma.20G024800.1.p|Glyma.05G046300.1.p|Glyma.12G036200.1.p|Glyma.16G043500.1.p…	http://www.genome.jp/kegg-bin/show_pathway?gmx00230/gmx:100811618%09red/gmx:100811753%09red/gmx:100780166%09red/gmx:100777103%09red/gmx:100792329%09red/gmx:547634%09red/gmx:100797579%09red/gmx:100784319%09red/gmx:100790263%09red/gmx:547791%09red/gmx:100801737%09red/gmx:100818830%09red/gmx:100787491%09red/gmx:547870%09red/gmx:100305792%09red/gmx:100805275%09red/gmx:100818572%09red/gmx:100814972%09…
Valine, leucine and isoleucine degradation	KEGG PATHWAY	gmx00280	15	93	9.35467e-05	0.000220224	Glyma.10G124700.1.p|Glyma.02G131500.1.p|Glyma.17G132300.1.p|Glyma.11G045300.1.p|Glyma.06G183900.1.p|Glyma.14G004600.1.p|Glyma.08G040000.1.p|Glyma.17G037900.1.p|Glyma.19G128600.3.p|Glyma.08G002700.1.p|Glyma.07G180100.1.p|Glyma.07G232900.1.p|Glyma.15G143100.1.p|Glyma.15G178400.1.p|Glyma.08G204300.1.p	http://www.genome.jp/kegg-bin/show_pathway?gmx00280/gmx:100811501%09red/gmx:100811186%09red/gmx:100780554%09red/gmx:547523%09red/gmx:100798328%09red/gmx:100776777%09red/gmx:100813160%09red/gmx:100810130%09red/gmx:100803176%09red/gmx:100800699%09red/gmx:100791763%09red/gmx:100789930%09red/gmx:100170734%09red/gmx:100801507%09red/gmx:100788043%09red
Galactose metabolism	KEGG PATHWAY	gmx00052	16	111	0.000178911	0.000412591	Glyma.12G036700.1.p|Glyma.02G241100.1.p|Glyma.10G194300.1.p|Glyma.05G056300.1.p|Glyma.08G044100.1.p|Glyma.09G239800.1.p|Glyma.14G210700.1.p|Glyma.18G215700.1.p|Glyma.07G126400.1.p|Glyma.13G152500.1.p|Glyma.01G024800.1.p|Glyma.15G133700.1.p|Glyma.09G160400.1.p|Glyma.07G124500.1.p|Glyma.17G138500.1.p|Glyma.10G241000.1.p	http://www.genome.jp/kegg-bin/show_pathway?gmx00052/gmx:100806500%09red/gmx:547845%09red/gmx:100777498%09red/gmx:100790112%09red/gmx:100798975%09red/gmx:100780166%09red/gmx:100820495%09red/gmx:100786385%09red/gmx:100802730%09red/gmx:100812330%09red/gmx:100794539%09red/gmx:100788844%09red/gmx:100799487%09red/gmx:100794066%09red/gmx:100776597%09red
Tyrosine metabolism	KEGG PATHWAY	gmx00350	13	85	0.000423409	0.000956904	Glyma.05G181000.1.p|Glyma.06G275700.1.p|Glyma.08G282800.1.p|Glyma.06G082400.1.p|Glyma.07G245900.1.p|Glyma.17G216000.2.p|Glyma.06G122600.1.p|Glyma.06G270400.1.p|Glyma.14G111800.1.p|Glyma.09G010000.1.p|Glyma.13G183200.1.p|Glyma.13G183500.1.p|Glyma.03G168700.1.p	http://www.genome.jp/kegg-bin/show_pathway?gmx00350/gmx:100775700%09red/gmx:547792%09red/gmx:100801369%09red/gmx:100811514%09red/gmx:547813%09red/gmx:100801361%09red/gmx:100801918%09red/gmx:100783091%09red/gmx:547509%09red/gmx:100499743%09red/gmx:100798709%09red/gmx:100792012%09red/gmx:100817986%09red
Tropane, piperidine and pyridine alkaloid biosynthesis	KEGG PATHWAY	gmx00960	9	43	0.000449735	0.000996471	Glyma.05G181000.1.p|Glyma.08G282800.1.p|Glyma.11G221400.1.p|Glyma.06G082400.1.p|Glyma.18G186400.1.p|Glyma.17G216000.2.p|Glyma.06G275700.1.p|Glyma.14G111800.1.p|Glyma.18G186800.1.p	http://www.genome.jp/kegg-bin/show_pathway?gmx00960/gmx:547792%09red/gmx:100811514%09red/gmx:547813%09red/gmx:100306108%09red/gmx:100801361%09red/gmx:100786456%09red/gmx:547509%09red/gmx:100819646%09red/gmx:100783091%09red
Isoquinoline alkaloid biosynthesis	KEGG PATHWAY	gmx00950	9	46	0.000689321	0.00149795	Glyma.05G181000.1.p|Glyma.08G282800.1.p|Glyma.06G082400.1.p|Glyma.17G216000.2.p|Glyma.06G275700.1.p|Glyma.06G270400.1.p|Glyma.14G111800.1.p|Glyma.13G183200.1.p|Glyma.13G183500.1.p	http://www.genome.jp/kegg-bin/show_pathway?gmx00950/gmx:547792%09red/gmx:100801369%09red/gmx:100811514%09red/gmx:547813%09red/gmx:100801361%09red/gmx:100792012%09red/gmx:100783091%09red/gmx:547509%09red/gmx:100798709%09red
Arachidonic acid metabolism	KEGG PATHWAY	gmx00590	7	30	0.00111142	0.00236963	Glyma.05G240100.1.p|Glyma.19G154100.2.p|Glyma.08G013900.1.p|Glyma.17G223900.1.p|Glyma.08G047200.1.p|Glyma.08G013800.1.p|Glyma.18G021100.1.p	http://www.genome.jp/kegg-bin/show_pathway?gmx00590/gmx:100808523%09red/gmx:100527297%09red/gmx:100306295%09red/gmx:100797040%09red/gmx:100306136%09red/gmx:100305775%09red/gmx:100306590%09red
Cyanoamino acid metabolism	KEGG PATHWAY	gmx00460	12	84	0.0011841	0.00247783	Glyma.08G108900.2.p|Glyma.11G180900.1.p|Glyma.18G150000.1.p|Glyma.10G106600.1.p|Glyma.08G150400.1.p|Glyma.13G222300.1.p|Glyma.08G274400.1.p|Glyma.09G258000.1.p|Glyma.07G258600.1.p|Glyma.07G100500.1.p|Glyma.18G021100.1.p|Glyma.07G126200.1.p	http://www.genome.jp/kegg-bin/show_pathway?gmx00460/gmx:100806420%09red/gmx:100499635%09red/gmx:100797040%09red/gmx:100790658%09red/gmx:547729%09red/gmx:100305380%09red/gmx:100777131%09red/gmx:100809047%09red/gmx:100305381%09red/gmx:100814740%09red/gmx:100778110%09red
Phenylpropanoid biosynthesis	KEGG PATHWAY	gmx00940	29	332	0.00184647	0.00379365	Glyma.03G145600.1.p|Glyma.02G234200.1.p|Glyma.16G164200.1.p|Glyma.13G106400.1.p|Glyma.14G201800.1.p|Glyma.10G106600.1.p|Glyma.09G022400.1.p|Glyma.17G171100.1.p|Glyma.10G262400.1.p|Glyma.10G222500.1.p|Glyma.07G100500.1.p|Glyma.07G258600.1.p|Glyma.12G129500.1.p|Glyma.18G055300.1.p|Glyma.20G214200.1.p|Glyma.08G150400.1.p|Glyma.07G087500.1.p|Glyma.20G169200.1.p|Glyma.08G179600.1.p|Glyma.09G277800.1.p…	http://www.genome.jp/kegg-bin/show_pathway?gmx00940/gmx:100783920%09red/gmx:547499%09red/gmx:100809071%09red/gmx:100777558%09red/gmx:100793973%09red/gmx:100815671%09red/gmx:100814740%09red/gmx:100814455%09red/gmx:100817540%09red/gmx:547550%09red/gmx:100305498%09red/gmx:548068%09red/gmx:100775837%09red/gmx:100804126%09red/gmx:547729%09red/gmx:100809047%09red/gmx:100783115%09red/gmx:100808944%09red…
Vitamin B6 metabolism	KEGG PATHWAY	gmx00750	6	25	0.0022171	0.0044738	Glyma.11G084400.1.p|Glyma.13G225000.1.p|Glyma.03G060100.1.p|Glyma.17G052000.1.p|Glyma.04G093600.1.p|Glyma.15G087200.1.p	http://www.genome.jp/kegg-bin/show_pathway?gmx00750/gmx:732627%09red/gmx:100816306%09red/gmx:100795497%09red/gmx:100779355%09red/gmx:100776337%09red/gmx:100788585%09red
Other glycan degradation	KEGG PATHWAY	gmx00511	6	31	0.0055745	0.0110512	Glyma.04G200900.1.p|Glyma.10G260900.1.p|Glyma.18G286200.1.p|Glyma.02G046800.1.p|Glyma.10G290900.1.p|Glyma.16G048100.1.p	http://www.genome.jp/kegg-bin/show_pathway?gmx00511/gmx:100817294%09red/gmx:100814818%09red/gmx:100776871%09red/gmx:100798150%09red/gmx:100776282%09red/gmx:100775419%09red
Histidine metabolism	KEGG PATHWAY	gmx00340	7	43	0.00651887	0.0127006	Glyma.04G009800.1.p|Glyma.03G176400.1.p|Glyma.15G131700.1.p|Glyma.06G183900.1.p|Glyma.16G046900.1.p|Glyma.08G002700.1.p|Glyma.15G178400.1.p	http://www.genome.jp/kegg-bin/show_pathway?gmx00340/gmx:100811501%09red/gmx:100807276%09red/gmx:100816684%09red/gmx:100800699%09red/gmx:100817490%09red/gmx:100811186%09red/gmx:100527811%09red
Fatty acid degradation	KEGG PATHWAY	gmx00071	11	93	0.00682712	0.0130757	Glyma.10G124700.1.p|Glyma.06G183900.1.p|Glyma.14G004600.1.p|Glyma.20G143900.1.p|Glyma.11G035200.1.p|Glyma.06G122600.1.p|Glyma.08G002700.1.p|Glyma.07G180100.1.p|Glyma.07G246300.1.p|Glyma.03G168700.1.p|Glyma.15G178400.1.p	http://www.genome.jp/kegg-bin/show_pathway?gmx00071/gmx:100811501%09red/gmx:100776777%09red/gmx:100801918%09red/gmx:100777319%09red/gmx:100800699%09red/gmx:100789930%09red/gmx:100301904%09red/gmx:547625%09red/gmx:100499743%09red/gmx:100170734%09red/gmx:100811186%09red
Starch and sucrose metabolism	KEGG PATHWAY	gmx00500	34	452	0.00716828	0.0134688	Glyma.08G180900.1.p|Glyma.02G304500.2.p|Glyma.10G106600.1.p|Glyma.14G210700.1.p|Glyma.13G152500.1.p|Glyma.12G064600.3.p|Glyma.19G022900.1.p|Glyma.19G125800.1.p|Glyma.07G100500.1.p|Glyma.02G241100.1.p|Glyma.02G245800.1.p|Glyma.13G062700.1.p|Glyma.05G056300.1.p|Glyma.08G044100.1.p|Glyma.08G150400.1.p|Glyma.11G127200.1.p|Glyma.04G092400.1.p|Glyma.07G046000.1.p|Glyma.10G241000.1.p|Glyma.04G017700.1.p…	http://www.genome.jp/kegg-bin/show_pathway?gmx00500/gmx:100782830%09red/gmx:100793021%09red/gmx:100780166%09red/gmx:100788844%09red/gmx:100791285%09red/gmx:100814740%09red/gmx:100794066%09red/gmx:100809452%09red/gmx:100792499%09red/gmx:100790112%09red/gmx:100780082%09red/gmx:100792948%09red/gmx:100802730%09red/gmx:100799487%09red/gmx:100777500%09red/gmx:547729%09red/gmx:100786385%09red/gmx:100809…
Biosynthesis of unsaturated fatty acids	KEGG PATHWAY	gmx01040	7	44	0.00727075	0.0134688	Glyma.10G124700.1.p|Glyma.07G207200.1.p|Glyma.18G009200.1.p|Glyma.07G180100.1.p|Glyma.11G035200.1.p|Glyma.16G042000.1.p|Glyma.11G248000.1.p	http://www.genome.jp/kegg-bin/show_pathway?gmx01040/gmx:100217331%09red/gmx:100809809%09red/gmx:100806814%09red/gmx:100809416%09red/gmx:100170734%09red/gmx:547625%09red/gmx:100789930%09red
beta-Alanine metabolism	KEGG PATHWAY	gmx00410	11	95	0.00785283	0.0143124	Glyma.08G282800.1.p|Glyma.16G218500.1.p|Glyma.18G137100.1.p|Glyma.06G183900.1.p|Glyma.15G055500.1.p|Glyma.15G178400.1.p|Glyma.18G043600.1.p|Glyma.08G002700.1.p|Glyma.02G033900.1.p|Glyma.08G040000.1.p|Glyma.07G105400.1.p	http://www.genome.jp/kegg-bin/show_pathway?gmx00410/gmx:100811501%09red/gmx:547724%09red/gmx:100783047%09red/gmx:100776863%09red/gmx:100818990%09red/gmx:100813160%09red/gmx:100800699%09red/gmx:100797867%09red/gmx:100783091%09red/gmx:100792107%09red/gmx:100811186%09red
Arginine and proline metabolism	KEGG PATHWAY	gmx00330	13	123	0.00805394	0.014446	Glyma.02G033900.1.p|Glyma.18G137100.1.p|Glyma.19G131500.1.p|Glyma.06G183900.1.p|Glyma.06G082400.1.p|Glyma.17G216000.2.p|Glyma.15G178400.1.p|Glyma.06G275700.1.p|Glyma.14G111800.1.p|Glyma.03G028000.1.p|Glyma.08G002700.1.p|Glyma.15G061600.1.p|Glyma.01G140200.1.p	http://www.genome.jp/kegg-bin/show_pathway?gmx00330/gmx:100811501%09red/gmx:100793450%09red/gmx:547792%09red/gmx:100792107%09red/gmx:100811514%09red/gmx:100776863%09red/gmx:547813%09red/gmx:547994%09red/gmx:100800699%09red/gmx:547509%09red/gmx:547907%09red/gmx:100811186%09red/gmx:100789799%09red
mRNA surveillance pathway	KEGG PATHWAY	gmx03015	19	216	0.00963043	0.0170037	Glyma.13G334200.1.p|Glyma.02G103900.1.p|Glyma.11G015500.1.p|Glyma.11G237500.3.p|Glyma.05G243400.1.p|Glyma.02G068500.2.p|Glyma.01G227300.1.p|Glyma.03G109200.1.p|Glyma.15G158800.1.p|Glyma.11G141500.2.p|Glyma.07G215300.3.p|Glyma.18G081700.1.p|Glyma.03G019600.1.p|Glyma.08G172000.1.p|Glyma.07G090200.1.p|Glyma.17G240400.1.p|Glyma.18G019700.1.p|Glyma.10G191400.1.p|Glyma.18G077300.4.p	http://www.genome.jp/kegg-bin/show_pathway?gmx03015/gmx:100816245%09red/gmx:100527139%09red/gmx:100804778%09red/gmx:100817317%09red/gmx:100794390%09red/gmx:100799440%09red/gmx:100811385%09red/gmx:100780329%09red/gmx:100527187%09red/gmx:100811056%09red/gmx:100526922%09red/gmx:100783362%09red/gmx:100786788%09red/gmx:100778595%09red/gmx:100795032%09red/gmx:100499908%09red/gmx:100786288%09red/gmx:100…
Folate biosynthesis	KEGG PATHWAY	gmx00790	6	36	0.0104155	0.0181069	Glyma.13G267900.1.p|Glyma.13G268000.1.p|Glyma.03G203800.4.p|Glyma.02G251400.1.p|Glyma.13G267800.1.p|Glyma.07G068300.1.p	http://www.genome.jp/kegg-bin/show_pathway?gmx00790/gmx:100527653%09red/gmx:547881%09red/gmx:100526908%09red/gmx:100796947%09red/gmx:100811054%09red
Linoleic acid metabolism	KEGG PATHWAY	gmx00591	7	48	0.0109298	0.0187132	Glyma.13G347700.1.p|Glyma.20G054000.1.p|Glyma.15G026500.1.p|Glyma.07G007000.1.p|Glyma.15G026400.1.p|Glyma.07G006900.1.p|Glyma.07G034800.1.p	http://www.genome.jp/kegg-bin/show_pathway?gmx00591/gmx:547856%09red/gmx:547836%09red/gmx:547835%09red/gmx:100803358%09red/gmx:100101853%09red/gmx:106794093%09red/gmx:100127399%09red
RNA degradation	KEGG PATHWAY	gmx03018	17	193	0.0136277	0.022984	Glyma.02G155300.1.p|Glyma.18G229600.2.p|Glyma.02G103900.1.p|Glyma.20G079300.1.p|Glyma.10G194300.1.p|Glyma.01G024800.1.p|Glyma.15G250500.1.p|Glyma.07G126400.1.p|Glyma.07G215300.3.p|Glyma.08G175900.1.p|Glyma.02G304200.1.p|Glyma.10G193200.1.p|Glyma.03G190500.1.p|Glyma.19G190900.1.p|Glyma.17G240400.1.p|Glyma.02G082300.1.p|Glyma.20G197100.1.p	http://www.genome.jp/kegg-bin/show_pathway?gmx03018/gmx:547752%09red/gmx:100794539%09red/gmx:100795851%09red/gmx:100819369%09red/gmx:100818544%09red/gmx:100811385%09red/gmx:100780329%09red/gmx:100813735%09red/gmx:100820495%09red/gmx:100820546%09red/gmx:100811084%09red/gmx:100777674%09red/gmx:100811995%09red/gmx:100499782%09red/gmx:100789125%09red/gmx:100776597%09red/gmx:100797765%09red
Riboflavin metabolism	KEGG PATHWAY	gmx00740	4	19	0.0178055	0.0295886	Glyma.12G112900.1.p|Glyma.08G087500.1.p|Glyma.15G041600.1.p|Glyma.13G042600.4.p	http://www.genome.jp/kegg-bin/show_pathway?gmx00740/gmx:100791686%09red/gmx:100786573%09red/gmx:100818483%09red/gmx:100809163%09red
Lysine degradation	KEGG PATHWAY	gmx00310	7	54	0.0186833	0.0305974	Glyma.02G094300.1.p|Glyma.02G292500.1.p|Glyma.06G183900.1.p|Glyma.14G004600.1.p|Glyma.14G022100.1.p|Glyma.08G002700.1.p|Glyma.15G178400.1.p	http://www.genome.jp/kegg-bin/show_pathway?gmx00310/gmx:100811501%09red/gmx:100776777%09red/gmx:100800699%09red/gmx:100813488%09red/gmx:100786978%09red/gmx:100811186%09red/gmx:100799149%09red
Pyrimidine metabolism	KEGG PATHWAY	gmx00240	18	217	0.019009	0.030686	Glyma.03G102700.1.p|Glyma.11G088200.1.p|Glyma.05G216700.1.p|Glyma.16G043400.1.p|Glyma.17G127400.1.p|Glyma.16G083500.1.p|Glyma.07G105400.1.p|Glyma.06G150000.1.p|Glyma.10G113100.1.p|Glyma.15G055500.1.p|Glyma.15G045100.1.p|Glyma.11G154200.4.p|Glyma.03G069600.1.p|Glyma.07G115900.1.p|Glyma.04G216000.1.p|Glyma.16G043500.1.p|Glyma.13G328600.1.p|Glyma.02G185300.1.p	http://www.genome.jp/kegg-bin/show_pathway?gmx00240/gmx:100811753%09red/gmx:100790557%09red/gmx:100306684%09red/gmx:100794561%09red/gmx:100818990%09red/gmx:100819254%09red/gmx:100527475%09red/gmx:100784833%09red/gmx:100807008%09red/gmx:100788470%09red/gmx:100797867%09red/gmx:100797877%09red/gmx:100306603%09red/gmx:100806168%09red/gmx:100787491%09red/gmx:100819867%09red/gmx:100797953%09red/gmx:547…
Inositol phosphate metabolism	KEGG PATHWAY	gmx00562	11	111	0.0209242	0.0333019	Glyma.04G009800.1.p|Glyma.15G115500.1.p|Glyma.03G185800.1.p|Glyma.18G018600.1.p|Glyma.19G186000.1.p|Glyma.06G218300.1.p|Glyma.08G138200.2.p|Glyma.14G059200.1.p|Glyma.15G038100.1.p|Glyma.13G336200.1.p|Glyma.08G086800.1.p	http://www.genome.jp/kegg-bin/show_pathway?gmx00562/gmx:100796770%09red/gmx:106797152%09red/gmx:100819824%09red/gmx:100817591%09red/gmx:547761%09red/gmx:100799358%09red/gmx:100819908%09red/gmx:100817415%09red/gmx:100796274%09red/gmx:547864%09red/gmx:100527811%09red
Pantothenate and CoA biosynthesis	KEGG PATHWAY	gmx00770	7	56	0.021957	0.0344602	Glyma.11G045300.1.p|Glyma.07G105400.1.p|Glyma.13G207900.1.p|Glyma.15G055500.1.p|Glyma.12G122900.1.p|Glyma.05G167700.1.p|Glyma.15G072500.1.p	http://www.genome.jp/kegg-bin/show_pathway?gmx00770/gmx:100779210%09red/gmx:100783934%09red/gmx:100798328%09red/gmx:100818990%09red/gmx:100806689%09red/gmx:100797867%09red/gmx:100789879%09red
Glycosphingolipid biosynthesis - globo series	KEGG PATHWAY	gmx00603	4	21	0.0237101	0.0367019	Glyma.09G160400.1.p|Glyma.18G286200.1.p|Glyma.10G290900.1.p|Glyma.18G215700.1.p	http://www.genome.jp/kegg-bin/show_pathway?gmx00603/gmx:547845%09red/gmx:100814818%09red/gmx:100776871%09red/gmx:100812330%09red
Phenylalanine metabolism	KEGG PATHWAY	gmx00360	8	72	0.0263773	0.0402788	Glyma.05G181000.1.p|Glyma.11G194500.1.p|Glyma.08G282800.1.p|Glyma.06G082400.1.p|Glyma.17G216000.2.p|Glyma.17G171100.1.p|Glyma.06G275700.1.p|Glyma.14G111800.1.p	http://www.genome.jp/kegg-bin/show_pathway?gmx00360/gmx:100808944%09red/gmx:547792%09red/gmx:100811514%09red/gmx:547813%09red/gmx:100801361%09red/gmx:100305498%09red/gmx:100783091%09red/gmx:547509%09red
Monoterpenoid biosynthesis	KEGG PATHWAY	gmx00902	3	14	0.0378558	0.0562856	Glyma.07G073800.1.p|Glyma.03G014300.1.p|Glyma.09G262800.1.p	http://www.genome.jp/kegg-bin/show_pathway?gmx00902/gmx:100804943%09red/gmx:100801677%09red/gmx:100806995%09red
Synthesis and degradation of ketone bodies	KEGG PATHWAY	gmx00072	3	14	0.0378558	0.0562856	Glyma.14G004600.1.p|Glyma.19G128600.3.p|Glyma.17G132300.1.p	http://www.genome.jp/kegg-bin/show_pathway?gmx00072/gmx:100801507%09red/gmx:100780554%09red/gmx:100776777%09red
Tryptophan metabolism	KEGG PATHWAY	gmx00380	7	70	0.0562527	0.0825527	Glyma.02G094300.1.p|Glyma.06G183900.1.p|Glyma.14G004600.1.p|Glyma.04G017500.1.p|Glyma.06G017900.1.p|Glyma.08G002700.1.p|Glyma.15G178400.1.p	http://www.genome.jp/kegg-bin/show_pathway?gmx00380/gmx:100811501%09red/gmx:100776777%09red/gmx:100800699%09red/gmx:100786978%09red/gmx:547511%09red/gmx:100811186%09red/gmx:100037448%09red
Glycosphingolipid biosynthesis - ganglio series	KEGG PATHWAY	gmx00604	2	8	0.0706994	0.102423	Glyma.18G286200.1.p|Glyma.10G290900.1.p	http://www.genome.jp/kegg-bin/show_pathway?gmx00604/gmx:100814818%09red/gmx:100776871%09red
alpha-Linolenic acid metabolism	KEGG PATHWAY	gmx00592	9	106	0.0725166	0.103726	Glyma.20G054000.1.p|Glyma.01G235600.1.p|Glyma.11G035200.1.p|Glyma.06G122600.1.p|Glyma.07G246300.1.p|Glyma.10G124700.1.p|Glyma.07G180100.1.p|Glyma.12G191400.1.p|Glyma.18G280900.1.p	http://www.genome.jp/kegg-bin/show_pathway?gmx00592/gmx:100777319%09red/gmx:547625%09red/gmx:100784395%09red/gmx:100801918%09red/gmx:106794093%09red/gmx:100170734%09red/gmx:100805194%09red/gmx:100789930%09red/gmx:100803381%09red
Pentose and glucuronate interconversions	KEGG PATHWAY	gmx00040	14	194	0.0841751	0.118897	Glyma.12G036700.1.p|Glyma.16G199200.1.p|Glyma.02G241100.1.p|Glyma.06G183900.1.p|Glyma.14G210700.1.p|Glyma.13G152500.1.p|Glyma.17G066200.3.p|Glyma.07G046000.1.p|Glyma.08G002700.1.p|Glyma.08G243000.1.p|Glyma.05G025300.2.p|Glyma.17G101700.2.p|Glyma.15G184400.1.p|Glyma.19G088400.1.p	http://www.genome.jp/kegg-bin/show_pathway?gmx00040/gmx:100811501%09red/gmx:100500085%09red/gmx:100790112%09red/gmx:100806500%09red/gmx:100777500%09red/gmx:100804624%09red/gmx:100800699%09red/gmx:100777646%09red/gmx:548074%09red/gmx:100786514%09red/gmx:100820630%09red/gmx:100794066%09red/gmx:100817791%09red
Taurine and hypotaurine metabolism	KEGG PATHWAY	gmx00430	4	34	0.0881934	0.123035	Glyma.18G043600.1.p|Glyma.16G218500.1.p|Glyma.18G021100.1.p|Glyma.07G126200.1.p	http://www.genome.jp/kegg-bin/show_pathway?gmx00430/gmx:100777131%09red/gmx:547724%09red/gmx:100783047%09red/gmx:100797040%09red
Carotenoid biosynthesis	KEGG PATHWAY	gmx00906	6	64	0.0923463	0.127258	Glyma.19G251000.1.p|Glyma.11G253000.1.p|Glyma.17G174500.1.p|Glyma.11G151400.1.p|Glyma.03G253500.1.p|Glyma.01G154900.1.p	http://www.genome.jp/kegg-bin/show_pathway?gmx00906/gmx:100127420%09red/gmx:100816085%09red/gmx:100800186%09red/gmx:100778118%09red/gmx:100777875%09red/gmx:100786658%09red
Endocytosis	KEGG PATHWAY	gmx04144	21	334	0.118033	0.160696	Glyma.13G216600.1.p|Glyma.09G002100.1.p|Glyma.12G064000.1.p|Glyma.13G352200.1.p|Glyma.02G075900.1.p|Glyma.01G096300.1.p|Glyma.12G147400.1.p|Glyma.07G127300.1.p|Glyma.07G170800.1.p|Glyma.19G172200.1.p|Glyma.03G171100.1.p|Glyma.02G009600.1.p|Glyma.18G289100.1.p|Glyma.14G091600.1.p|Glyma.13G130900.1.p|Glyma.12G183700.1.p|Glyma.08G211700.1.p|Glyma.04G210200.2.p|Glyma.11G140500.1.p|Glyma.09G068000.1.p…	http://www.genome.jp/kegg-bin/show_pathway?gmx04144/gmx:100786410%09red/gmx:100807561%09red/gmx:100802587%09red/gmx:100806836%09red/gmx:100778966%09red/gmx:100775459%09red/gmx:102667572%09red/gmx:100816111%09red/gmx:100777767%09red/gmx:100795747%09red/gmx:100789796%09red/gmx:100780154%09red/gmx:100809198%09red/gmx:100812707%09red/gmx:100798307%09red/gmx:100805899%09red/gmx:100787543%09red/gmx:100…
Thiamine metabolism	KEGG PATHWAY	gmx00730	3	27	0.148474	0.197702	Glyma.01G197100.2.p|Glyma.08G188200.1.p|Glyma.10G251500.1.p	http://www.genome.jp/kegg-bin/show_pathway?gmx00730/gmx:100785725%09red/gmx:100788953%09red/gmx:100811722%09red
Protein export	KEGG PATHWAY	gmx03060	7	91	0.148714	0.197702	Glyma.12G064100.1.p|Glyma.08G025700.1.p|Glyma.03G196900.1.p|Glyma.08G038100.1.p|Glyma.20G224600.1.p|Glyma.11G245300.1.p|Glyma.10G162200.1.p	http://www.genome.jp/kegg-bin/show_pathway?gmx03060/gmx:100782581%09red/gmx:100817173%09red/gmx:547838%09red/gmx:100815810%09red/gmx:100500409%09red/gmx:100815190%09red/gmx:100807037%09red
Glycerolipid metabolism	KEGG PATHWAY	gmx00561	9	135	0.19583	0.257311	Glyma.09G207900.2.p|Glyma.12G036700.1.p|Glyma.15G012500.1.p|Glyma.06G183900.1.p|Glyma.18G215700.1.p|Glyma.08G002700.1.p|Glyma.09G160400.1.p|Glyma.13G361400.1.p|Glyma.15G178400.1.p	http://www.genome.jp/kegg-bin/show_pathway?gmx00561/gmx:100811501%09red/gmx:100806500%09red/gmx:547845%09red/gmx:100800190%09red/gmx:100800699%09red/gmx:100820573%09red/gmx:100806896%09red/gmx:100811186%09red/gmx:100812330%09red
Plant-pathogen interaction	KEGG PATHWAY	gmx04626	19	325	0.201878	0.26221	Glyma.08G177600.1.p|Glyma.05G245600.1.p|Glyma.02G302500.1.p|Glyma.01G211700.1.p|Glyma.11G030100.1.p|Glyma.08G005600.1.p|Glyma.10G295700.1.p|Glyma.08G053500.3.p|Glyma.02G008500.1.p|Glyma.01G068000.1.p|Glyma.14G007700.1.p|Glyma.15G062700.1.p|Glyma.18G074100.1.p|Glyma.09G131500.1.p|Glyma.17G258700.1.p|Glyma.11G021000.1.p|Glyma.02G275600.1.p|Glyma.14G219700.1.p|Glyma.02G124500.1.p	http://www.genome.jp/kegg-bin/show_pathway?gmx04626/gmx:100779976%09red/gmx:100808383%09red/gmx:100500081%09red/gmx:100790016%09red/gmx:100785017%09red/gmx:547825%09red/gmx:100784022%09red/gmx:100794671%09red/gmx:100811234%09red/gmx:100806710%09red/gmx:100500636%09red/gmx:100783572%09red/gmx:100807250%09red/gmx:100527568%09red/gmx:100194422%09red/gmx:100194423%09red/gmx:100819778%09red/gmx:100819…
Sulfur relay system	KEGG PATHWAY	gmx04122	2	17	0.207403	0.266325	Glyma.01G197100.2.p|Glyma.08G167100.1.p	http://www.genome.jp/kegg-bin/show_pathway?gmx04122/gmx:100785725%09red/gmx:100798053%09red
SNARE interactions in vesicular transport	KEGG PATHWAY	gmx04130	6	87	0.235982	0.299617	Glyma.09G097700.1.p|Glyma.01G015600.1.p|Glyma.13G060700.1.p|Glyma.02G279100.1.p|Glyma.18G089600.1.p|Glyma.10G051400.1.p	http://www.genome.jp/kegg-bin/show_pathway?gmx04130/gmx:100816145%09red/gmx:100794038%09red/gmx:100819272%09red/gmx:100803941%09red/gmx:100306336%09red/gmx:100810149%09red
Limonene and pinene degradation	KEGG PATHWAY	gmx00903	2	19	0.240804	0.302343	Glyma.06G183900.1.p|Glyma.08G002700.1.p	http://www.genome.jp/kegg-bin/show_pathway?gmx00903/gmx:100811501%09red/gmx:100800699%09red
Steroid biosynthesis	KEGG PATHWAY	gmx00100	4	60	0.320268	0.397696	Glyma.11G112000.1.p|Glyma.04G020600.1.p|Glyma.10G090500.1.p|Glyma.12G028300.2.p	http://www.genome.jp/kegg-bin/show_pathway?gmx00100/gmx:100814521%09red/gmx:100804517%09red/gmx:100775983%09red/gmx:548073%09red
Flavone and flavonol biosynthesis	KEGG PATHWAY	gmx00944	1	10	0.395062	0.48524	Glyma.06G137100.1.p	http://www.genome.jp/kegg-bin/show_pathway?gmx00944/gmx:100805999%09red
Glycosaminoglycan degradation	KEGG PATHWAY	gmx00531	2	30	0.421577	0.512238	Glyma.18G286200.1.p|Glyma.10G290900.1.p	http://www.genome.jp/kegg-bin/show_pathway?gmx00531/gmx:100814818%09red/gmx:100776871%09red
Mismatch repair	KEGG PATHWAY	gmx03430	4	74	0.462272	0.55571	Glyma.13G236400.1.p|Glyma.01G030600.1.p|Glyma.08G334900.1.p|Glyma.01G030800.1.p	http://www.genome.jp/kegg-bin/show_pathway?gmx03430/gmx:100526985%09red/gmx:100499859%09red/gmx:548079%09red/gmx:100499987%09red
Phosphatidylinositol signaling system	KEGG PATHWAY	gmx04070	6	118	0.479776	0.570681	Glyma.04G009800.1.p|Glyma.15G115500.1.p|Glyma.02G275600.1.p|Glyma.06G218300.1.p|Glyma.14G059200.1.p|Glyma.08G086800.1.p	http://www.genome.jp/kegg-bin/show_pathway?gmx04070/gmx:100796770%09red/gmx:100817415%09red/gmx:100817591%09red/gmx:547864%09red/gmx:100817351%09red/gmx:100527811%09red
Ubiquitin mediated proteolysis	KEGG PATHWAY	gmx04120	10	214	0.545715	0.642352	Glyma.11G079600.1.p|Glyma.10G133700.1.p|Glyma.04G199200.2.p|Glyma.09G257800.1.p|Glyma.11G064000.1.p|Glyma.04G096900.1.p|Glyma.04G173300.1.p|Glyma.14G196800.1.p|Glyma.13G270800.1.p|Glyma.06G230300.1.p	http://www.genome.jp/kegg-bin/show_pathway?gmx04120/gmx:100813186%09red/gmx:100812138%09red/gmx:100812184%09red/gmx:100527683%09red/gmx:100799433%09red/gmx:100500231%09red/gmx:100499698%09red/gmx:100499741%09red/gmx:100800213%09red/gmx:100805631%09red
Stilbenoid, diarylheptanoid and gingerol biosynthesis	KEGG PATHWAY	gmx00945	2	44	0.614978	0.71141	Glyma.18G103500.1.p|Glyma.17G171100.1.p	http://www.genome.jp/kegg-bin/show_pathway?gmx00945/gmx:100803418%09red/gmx:100305498%09red
Sesquiterpenoid and triterpenoid biosynthesis	KEGG PATHWAY	gmx00909	1	20	0.616975	0.71141	Glyma.11G112000.1.p	http://www.genome.jp/kegg-bin/show_pathway?gmx00909/gmx:100775983%09red
Sphingolipid metabolism	KEGG PATHWAY	gmx00600	2	47	0.649375	0.741205	Glyma.09G160400.1.p|Glyma.18G215700.1.p	http://www.genome.jp/kegg-bin/show_pathway?gmx00600/gmx:547845%09red/gmx:100812330%09red
Nucleotide excision repair	KEGG PATHWAY	gmx03420	5	122	0.674604	0.762302	Glyma.13G236400.1.p|Glyma.01G030600.1.p|Glyma.08G334900.1.p|Glyma.01G081500.1.p|Glyma.01G030800.1.p	http://www.genome.jp/kegg-bin/show_pathway?gmx03420/gmx:100526985%09red/gmx:100499859%09red/gmx:548079%09red/gmx:100809066%09red/gmx:100499987%09red
DNA replication	KEGG PATHWAY	gmx03030	4	106	0.729127	0.808729	Glyma.13G236400.1.p|Glyma.01G030600.1.p|Glyma.08G334900.1.p|Glyma.01G030800.1.p	http://www.genome.jp/kegg-bin/show_pathway?gmx03030/gmx:100526985%09red/gmx:100499859%09red/gmx:548079%09red/gmx:100499987%09red
Homologous recombination	KEGG PATHWAY	gmx03440	3	81	0.730003	0.808729	Glyma.13G236400.1.p|Glyma.01G030600.1.p|Glyma.01G030800.1.p	http://www.genome.jp/kegg-bin/show_pathway?gmx03440/gmx:100526985%09red/gmx:100499859%09red/gmx:100499987%09red
Ribosome biogenesis in eukaryotes	KEGG PATHWAY	gmx03008	6	159	0.750509	0.823374	Glyma.04G069200.1.p|Glyma.03G164500.1.p|Glyma.09G158100.1.p|Glyma.18G020000.1.p|Glyma.13G167800.1.p|Glyma.19G165900.1.p	http://www.genome.jp/kegg-bin/show_pathway?gmx03008/gmx:100306376%09red/gmx:100500467%09red/gmx:100813605%09red/gmx:100789137%09red/gmx:100527424%09red/gmx:100813909%09red
Flavonoid biosynthesis	KEGG PATHWAY	gmx00941	3	86	0.765091	0.831301	Glyma.18G103500.1.p|Glyma.17G171100.1.p|Glyma.20G241500.1.p	http://www.genome.jp/kegg-bin/show_pathway?gmx00941/gmx:100803418%09red/gmx:547602%09red/gmx:100305498%09red
Ubiquinone and other terpenoid-quinone biosynthesis	KEGG PATHWAY	gmx00130	3	89	0.784303	0.844059	Glyma.11G194500.1.p|Glyma.07G188200.1.p|Glyma.08G285500.1.p	http://www.genome.jp/kegg-bin/show_pathway?gmx00130/gmx:100805113%09red/gmx:100808944%09red/gmx:100807101%09red
AGE-RAGE signaling pathway in diabetic complications	KEGG PATHWAY	gmx04933	1	35	0.807055	0.860351	Glyma.14G059200.1.p	http://www.genome.jp/kegg-bin/show_pathway?gmx04933/gmx:547864%09red
Base excision repair	KEGG PATHWAY	gmx03410	2	69	0.831691	0.878328	Glyma.01G116000.6.p|Glyma.08G334900.1.p	http://www.genome.jp/kegg-bin/show_pathway?gmx03410/gmx:548079%09red/gmx:100305961%09red
Ether lipid metabolism	KEGG PATHWAY	gmx00565	1	47	0.888534	0.92967	Glyma.08G211700.1.p	http://www.genome.jp/kegg-bin/show_pathway?gmx00565/gmx:100786410%09red
Cutin, suberine and wax biosynthesis	KEGG PATHWAY	gmx00073	1	52	0.911318	0.944761	Glyma.09G123800.1.p	http://www.genome.jp/kegg-bin/show_pathway?gmx00073/gmx:100799842%09red
N-Glycan biosynthesis	KEGG PATHWAY	gmx00510	1	74	0.967582	0.99397	Glyma.12G045400.1.p	http://www.genome.jp/kegg-bin/show_pathway?gmx00510/gmx:100806848%09red
Basal transcription factors	KEGG PATHWAY	gmx03022	1	89	0.983681	0.995105	Glyma.17G037200.1.p	http://www.genome.jp/kegg-bin/show_pathway?gmx03022/gmx:100306277%09red
Glycerophospholipid metabolism	KEGG PATHWAY	gmx00564	3	173	0.986299	0.995105	Glyma.08G211700.1.p|Glyma.09G207900.2.p|Glyma.17G078900.1.p	http://www.genome.jp/kegg-bin/show_pathway?gmx00564/gmx:100800181%09red/gmx:100800190%09red/gmx:100786410%09red
Plant hormone signal transduction	KEGG PATHWAY	gmx04075	3	618	1	1	Glyma.08G133600.1.p|Glyma.12G169800.1.p|Glyma.15G062700.1.p	http://www.genome.jp/kegg-bin/show_pathway?gmx04075/gmx:100807981%09red/gmx:100809324%09red/gmx:100807250%09red
--------------------
#Term	Database	ID	Input number	Background number	P-Value	Corrected P-Value	Input	Hyperlink
--------------------
#Term	Database	ID	Input number	Background number	P-Value	Corrected P-Value	Input	Hyperlink
--------------------

## Sheet: identified_prot.2h.enrich
##Databases: KEGG PATHWAY
##Statistical test method: hypergeometric test / Fisher's exact test
##FDR correction method: Benjamini and Hochberg
#Term	Database	ID	Input number	Background number	P-Value	Corrected P-Value	Input	Hyperlink
Metabolic pathways	KEGG PATHWAY	gmx01100	429	3553	5.22867e-94	5.75153e-92	Glyma.03G145600.1.p|Glyma.20G212900.1.p|Glyma.08G082900.1.p|Glyma.18G195900.1.p|Glyma.18G244900.1.p|Glyma.15G248500.1.p|Glyma.10G214200.3.p|Glyma.17G066200.3.p|Glyma.06G082400.1.p|Glyma.05G151100.1.p|Glyma.04G193500.1.p|Glyma.08G002700.1.p|Glyma.06G270400.1.p|Glyma.03G190500.1.p|Glyma.16G004400.1.p|Glyma.08G334000.1.p|Glyma.18G021100.1.p|Glyma.07G068300.1.p|Glyma.11G021400.1.p|Glyma.02G003300.1.p…	http://www.genome.jp/kegg-bin/show_pathway?gmx01100/gmx:100805941%09red/gmx:732571%09red/gmx:100781928%09red/gmx:100811326%09red/gmx:100306034%09red/gmx:100817945%09red/gmx:100801918%09red/gmx:100800699%09red/gmx:100814183%09red/gmx:100804126%09red/gmx:100808375%09red/gmx:100793702%09red/gmx:106794093%09red/gmx:100127420%09red/gmx:100799344%09red/gmx:547953%09red/gmx:100817348%09red/gmx:100305918…
Ribosome	KEGG PATHWAY	gmx03010	144	595	1.96223e-61	1.07922e-59	Glyma.15G185000.1.p|Glyma.04G224000.1.p|Glyma.13G285600.1.p|Glyma.09G255500.1.p|Glyma.07G269600.1.p|Glyma.15G102600.1.p|Glyma.13G243100.1.p|Glyma.02G085300.1.p|Glyma.07G114900.2.p|Glyma.01G029200.1.p|Glyma.08G141700.1.p|Glyma.13G237800.1.p|Glyma.09G138400.1.p|Glyma.11G146300.1.p|Glyma.13G136400.1.p|Glyma.08G151900.1.p|Glyma.08G159800.1.p|Glyma.10G067800.1.p|Glyma.19G145100.1.p|Glyma.04G132900.1.p…	http://www.genome.jp/kegg-bin/show_pathway?gmx03010/gmx:100305682%09red/gmx:100786828%09red/gmx:3989263%09red/gmx:100795924%09red/gmx:100793713%09red/gmx:100811498%09red/gmx:100811654%09red/gmx:100305981%09red/gmx:100499742%09red/gmx:100500355%09red/gmx:100500331%09red/gmx:100782305%09red/gmx:100499912%09red/gmx:100499673%09red/gmx:100499852%09red/gmx:100805318%09red/gmx:100306286%09red/gmx:10080…
Carbon metabolism	KEGG PATHWAY	gmx01200	121	488	1.17603e-52	4.31211e-51	Glyma.10G039000.1.p|Glyma.07G142700.1.p|Glyma.02G026800.1.p|Glyma.18G195900.1.p|Glyma.19G186000.1.p|Glyma.12G210600.1.p|Glyma.18G244900.1.p|Glyma.15G248500.1.p|Glyma.11G067800.1.p|Glyma.05G026300.1.p|Glyma.08G020500.1.p|Glyma.20G114500.2.p|Glyma.19G088400.1.p|Glyma.06G082400.1.p|Glyma.03G244800.2.p|Glyma.04G193500.1.p|Glyma.08G157700.1.p|Glyma.03G190500.1.p|Glyma.16G004400.1.p|Glyma.08G292800.1.p…	http://www.genome.jp/kegg-bin/show_pathway?gmx01200/gmx:100819824%09red/gmx:100780041%09red/gmx:100809241%09red/gmx:732655%09red/gmx:100786103%09red/gmx:100499743%09red/gmx:732571%09red/gmx:100781928%09red/gmx:100805786%09red/gmx:100789900%09red/gmx:100811326%09red/gmx:547963%09red/gmx:100799358%09red/gmx:100789100%09red/gmx:100798113%09red/gmx:100807451%09red/gmx:100101900%09red/gmx:100792394%09…
Biosynthesis of secondary metabolites	KEGG PATHWAY	gmx01110	235	2026	4.56721e-47	1.25598e-45	Glyma.03G145600.1.p|Glyma.01G173300.1.p|Glyma.16G164200.1.p|Glyma.08G064100.1.p|Glyma.02G026800.1.p|Glyma.18G195900.1.p|Glyma.03G181200.1.p|Glyma.10G039000.1.p|Glyma.17G128300.1.p|Glyma.19G186000.1.p|Glyma.18G244900.1.p|Glyma.15G248500.1.p|Glyma.01G028900.1.p|Glyma.12G021100.1.p|Glyma.11G067800.1.p|Glyma.05G026300.1.p|Glyma.20G214200.1.p|Glyma.12G191400.1.p|Glyma.10G006500.1.p|Glyma.19G088400.1.p…	http://www.genome.jp/kegg-bin/show_pathway?gmx01110/gmx:100814810%09red/gmx:100819824%09red/gmx:547963%09red/gmx:547550%09red/gmx:100809071%09red/gmx:106796332%09red/gmx:100803176%09red/gmx:100786103%09red/gmx:100783091%09red/gmx:100790249%09red/gmx:100820392%09red/gmx:100499743%09red/gmx:100814740%09red/gmx:100789900%09red/gmx:100811326%09red/gmx:100812287%09red/gmx:100817540%09red/gmx:100806689…
Carbon fixation in photosynthetic organisms	KEGG PATHWAY	gmx00710	54	129	2.09248e-33	4.60347e-32	Glyma.19G106800.1.p|Glyma.10G205500.1.p|Glyma.18G193600.1.p|Glyma.12G061600.1.p|Glyma.10G006500.1.p|Glyma.14G010900.1.p|Glyma.07G142700.1.p|Glyma.12G037400.1.p|Glyma.17G020600.1.p|Glyma.19G186000.1.p|Glyma.12G210600.1.p|Glyma.02G038100.2.p|Glyma.15G136200.1.p|Glyma.12G159300.1.p|Glyma.17G101700.2.p|Glyma.10G293500.1.p|Glyma.05G026300.1.p|Glyma.01G026700.1.p|Glyma.03G102900.1.p|Glyma.08G165400.1.p…	http://www.genome.jp/kegg-bin/show_pathway?gmx00710/gmx:100819824%09red/gmx:547963%09red/gmx:100806482%09red/gmx:100792666%09red/gmx:547756%09red/gmx:100807126%09red/gmx:100777515%09red/gmx:547755%09red/gmx:100786122%09red/gmx:732571%09red/gmx:547514%09red/gmx:100794277%09red/gmx:100127415%09red/gmx:100799793%09red/gmx:100802480%09red/gmx:100806545%09red/gmx:100782567%09red/gmx:100788090%09red/gm…
Photosynthesis	KEGG PATHWAY	gmx00195	52	120	8.37797e-33	1.53596e-31	Glyma.01G238000.1.p|Glyma.01G153500.1.p|Glyma.13G204800.1.p|Glyma.09G250800.1.p|Glyma.08G126800.1.p|Glyma.13G127200.1.p|Glyma.08G304200.1.p|Glyma.04G249700.1.p|Glyma.07G112000.2.p|Glyma.02G094900.1.p|Glyma.18G114900.1.p|Glyma.03G114600.1.p|Glyma.10G040600.1.p|Glyma.06G067400.1.p|Glyma.01G180800.1.p|Glyma.02G047600.1.p|Glyma.05G074900.1.p|Glyma.05G022900.1.p|Glyma.17G130100.1.p|Glyma.15G107900.2.p…	http://www.genome.jp/kegg-bin/show_pathway?gmx00195/gmx:100101915%09red/gmx:100785563%09red/gmx:100499708%09red/gmx:100781848%09red/gmx:100797290%09red/gmx:3989266%09red/gmx:100818731%09red/gmx:3989326%09red/gmx:100306554%09red/gmx:100499729%09red/gmx:100527009%09red/gmx:3989309%09red/gmx:100780777%09red/gmx:100306034%09red/gmx:100802315%09red/gmx:100802032%09red/gmx:3989283%09red/gmx:100527240%0…
Biosynthesis of amino acids	KEGG PATHWAY	gmx01230	81	429	1.61581e-28	2.53914e-27	Glyma.05G181000.1.p|Glyma.13G210800.2.p|Glyma.14G010900.1.p|Glyma.05G056400.1.p|Glyma.05G167700.1.p|Glyma.03G181200.1.p|Glyma.12G037400.1.p|Glyma.05G240700.1.p|Glyma.19G186000.1.p|Glyma.15G005400.1.p|Glyma.12G122900.1.p|Glyma.15G072500.1.p|Glyma.02G038100.2.p|Glyma.15G136200.1.p|Glyma.05G046700.1.p|Glyma.17G101700.2.p|Glyma.16G038300.1.p|Glyma.15G178400.1.p|Glyma.10G293500.1.p|Glyma.01G026700.1.p…	http://www.genome.jp/kegg-bin/show_pathway?gmx01230/gmx:100819824%09red/gmx:100796458%09red/gmx:547509%09red/gmx:100783691%09red/gmx:100792666%09red/gmx:547752%09red/gmx:100794084%09red/gmx:100817490%09red/gmx:100793061%09red/gmx:100812952%09red/gmx:100820392%09red/gmx:100795933%09red/gmx:100787994%09red/gmx:547514%09red/gmx:100789900%09red/gmx:100526928%09red/gmx:100811326%09red/gmx:100127415%09…
Glyoxylate and dicarboxylate metabolism	KEGG PATHWAY	gmx00630	46	130	3.75116e-26	5.15785e-25	Glyma.13G210800.2.p|Glyma.11G042200.1.p|Glyma.08G175800.1.p|Glyma.07G232900.1.p|Glyma.18G244900.1.p|Glyma.02G038100.2.p|Glyma.12G159300.1.p|Glyma.01G026700.1.p|Glyma.15G143100.1.p|Glyma.10G006500.1.p|Glyma.05G026300.1.p|Glyma.20G019600.1.p|Glyma.09G247900.1.p|Glyma.12G061600.1.p|Glyma.18G296900.1.p|Glyma.20G107800.1.p|Glyma.14G094700.1.p|Glyma.07G262100.2.p|Glyma.04G017500.1.p|Glyma.10G281400.1.p…	http://www.genome.jp/kegg-bin/show_pathway?gmx00630/gmx:100779623%09red/gmx:547963%09red/gmx:100809241%09red/gmx:100803176%09red/gmx:100812952%09red/gmx:100785811%09red/gmx:547511%09red/gmx:100817216%09red/gmx:100781928%09red/gmx:100794277%09red/gmx:100781418%09red/gmx:100127415%09red/gmx:100796561%09red/gmx:100799793%09red/gmx:100780873%09red/gmx:547953%09red/gmx:100037448%09red/gmx:547640%09red…
Oxidative phosphorylation	KEGG PATHWAY	gmx00190	54	237	1.04276e-22	1.27448e-21	Glyma.13G367000.1.p|Glyma.03G180700.1.p|Glyma.07G032800.1.p|Glyma.05G110100.1.p|Glyma.05G223100.1.p|Glyma.14G177100.2.p|Glyma.13G127400.2.p|Glyma.10G052700.1.p|Glyma.11G067800.1.p|Glyma.08G209700.1.p|Glyma.09G245700.1.p|Glyma.11G091800.1.p|Glyma.13G362900.2.p|Glyma.09G014000.1.p|Glyma.17G160400.1.p|Glyma.15G061300.1.p|Glyma.06G203200.1.p|Glyma.06G007900.1.p|Glyma.20G177700.1.p|Glyma.17G130100.1.p…	http://www.genome.jp/kegg-bin/show_pathway?gmx00190/gmx:100817153%09red/gmx:100306371%09red/gmx:100797290%09red/gmx:100775727%09red/gmx:100780778%09red/gmx:100791692%09red/gmx:100815377%09red/gmx:100798544%09red/gmx:100306450%09red/gmx:3989298%09red/gmx:100802040%09red/gmx:100527776%09red/gmx:100814088%09red/gmx:100526984%09red/gmx:100819356%09red/gmx:100777389%09red/gmx:100799603%09red/gmx:10077…
Spliceosome	KEGG PATHWAY	gmx03040	60	311	6.90357e-22	7.59393e-21	Glyma.08G245200.1.p|Glyma.10G123200.1.p|Glyma.13G241800.1.p|Glyma.09G001000.1.p|Glyma.05G117600.1.p|Glyma.18G266500.1.p|Glyma.11G237500.3.p|Glyma.19G195100.1.p|Glyma.01G227300.1.p|Glyma.15G005900.1.p|Glyma.02G288900.1.p|Glyma.03G143400.1.p|Glyma.13G009800.1.p|Glyma.12G064000.1.p|Glyma.02G155300.1.p|Glyma.17G004800.1.p|Glyma.20G216400.1.p|Glyma.02G247800.1.p|Glyma.14G188200.1.p|Glyma.20G113200.1.p…	http://www.genome.jp/kegg-bin/show_pathway?gmx03040/gmx:100816245%09red/gmx:100779321%09red/gmx:100804021%09red/gmx:100777152%09red/gmx:100818300%09red/gmx:100777767%09red/gmx:100527187%09red/gmx:100812698%09red/gmx:100783362%09red/gmx:100786807%09red/gmx:100778595%09red/gmx:100791039%09red/gmx:100815224%09red/gmx:100797765%09red/gmx:100805822%09red/gmx:100809519%09red/gmx:100817317%09red/gmx:100…
Pyruvate metabolism	KEGG PATHWAY	gmx00620	41	180	1.36925e-17	1.36925e-16	Glyma.10G205500.1.p|Glyma.10G006500.1.p|Glyma.03G102900.1.p|Glyma.02G026800.1.p|Glyma.18G195900.1.p|Glyma.17G020600.1.p|Glyma.12G210600.1.p|Glyma.07G232900.1.p|Glyma.15G248500.1.p|Glyma.04G083100.1.p|Glyma.12G159300.1.p|Glyma.05G026300.1.p|Glyma.15G178400.1.p|Glyma.20G114500.2.p|Glyma.15G143100.1.p|Glyma.12G161300.1.p|Glyma.02G005500.1.p|Glyma.07G261400.1.p|Glyma.18G243500.1.p|Glyma.08G002700.1.p…	http://www.genome.jp/kegg-bin/show_pathway?gmx00620/gmx:100800280%09red/gmx:100810908%09red/gmx:547498%09red/gmx:547963%09red/gmx:100813087%09red/gmx:100805001%09red/gmx:100778218%09red/gmx:100803176%09red/gmx:100804938%09red/gmx:3989306%09red/gmx:547756%09red/gmx:100793089%09red/gmx:547755%09red/gmx:100781250%09red/gmx:100777962%09red/gmx:100799793%09red/gmx:100806545%09red/gmx:100782567%09red/g…
Citrate cycle (TCA cycle)	KEGG PATHWAY	gmx00020	31	104	2.28965e-16	2.09885e-15	Glyma.10G039000.1.p|Glyma.10G006500.1.p|Glyma.02G026800.1.p|Glyma.07G232900.1.p|Glyma.01G028900.1.p|Glyma.12G159300.1.p|Glyma.05G026300.1.p|Glyma.11G067800.1.p|Glyma.02G292500.1.p|Glyma.15G143100.1.p|Glyma.02G094300.1.p|Glyma.02G241200.1.p|Glyma.14G022100.1.p|Glyma.08G157700.1.p|Glyma.16G004400.1.p|Glyma.08G292800.1.p|Glyma.07G035000.1.p|Glyma.02G005500.1.p|Glyma.08G063800.1.p|Glyma.17G037900.1.p…	http://www.genome.jp/kegg-bin/show_pathway?gmx00020/gmx:100800280%09red/gmx:100527938%09red/gmx:547963%09red/gmx:100813087%09red/gmx:100805001%09red/gmx:100778218%09red/gmx:100803176%09red/gmx:100813488%09red/gmx:100786103%09red/gmx:100781250%09red/gmx:100781418%09red/gmx:100812287%09red/gmx:100819151%09red/gmx:100799793%09red/gmx:100790952%09red/gmx:100811326%09red/gmx:100810850%09red/gmx:100818…
Photosynthesis - antenna proteins	KEGG PATHWAY	gmx00196	20	34	1.91189e-15	1.61775e-14	Glyma.16G165200.1.p|Glyma.04G167900.1.p|Glyma.03G060300.1.p|Glyma.01G115900.1.p|Glyma.20G212900.1.p|Glyma.02G305400.1.p|Glyma.02G064700.1.p|Glyma.11G228800.1.p|Glyma.08G180000.1.p|Glyma.06G194900.1.p|Glyma.08G082900.1.p|Glyma.12G219300.1.p|Glyma.08G074000.1.p|Glyma.15G052400.2.p|Glyma.06G039700.1.p|Glyma.05G128000.1.p|Glyma.16G165800.1.p|Glyma.02G309500.1.p|Glyma.09G154700.1.p|Glyma.18G028400.2.p	http://www.genome.jp/kegg-bin/show_pathway?gmx00196/gmx:547819%09red/gmx:100820335%09red/gmx:100817348%09red/gmx:100779387%09red/gmx:100793702%09red/gmx:100806585%09red/gmx:100802922%09red/gmx:100800350%09red/gmx:100800351%09red/gmx:100783223%09red/gmx:100500118%09red/gmx:100805310%09red/gmx:100785415%09red/gmx:100785180%09red/gmx:100798548%09red/gmx:100794604%09red/gmx:100804934%09red/gmx:100808…
Glycolysis / Gluconeogenesis	KEGG PATHWAY	gmx00010	44	253	5.19403e-15	4.08102e-14	Glyma.01G173300.1.p|Glyma.18G193600.1.p|Glyma.20G114500.2.p|Glyma.14G010900.1.p|Glyma.07G142700.1.p|Glyma.02G026800.1.p|Glyma.12G037400.1.p|Glyma.02G202500.1.p|Glyma.07G102900.1.p|Glyma.07G232900.1.p|Glyma.13G098500.1.p|Glyma.15G178400.1.p|Glyma.10G241000.1.p|Glyma.08G165400.1.p|Glyma.12G085900.1.p|Glyma.04G193500.1.p|Glyma.08G002700.1.p|Glyma.03G190500.1.p|Glyma.15G262100.1.p|Glyma.16G004400.1.p…	http://www.genome.jp/kegg-bin/show_pathway?gmx00010/gmx:100800280%09red/gmx:100819824%09red/gmx:100780041%09red/gmx:100813087%09red/gmx:100805001%09red/gmx:100778218%09red/gmx:547752%09red/gmx:100803176%09red/gmx:100794084%09red/gmx:100776238%09red/gmx:100499743%09red/gmx:100781250%09red/gmx:547514%09red/gmx:100809452%09red/gmx:100797902%09red/gmx:100802480%09red/gmx:100799358%09red/gmx:100798677…
Glutathione metabolism	KEGG PATHWAY	gmx00480	34	158	3.22055e-14	2.36174e-13	Glyma.06G114400.1.p|Glyma.13G135600.1.p|Glyma.19G077800.1.p|Glyma.18G137100.1.p|Glyma.02G204000.1.p|Glyma.14G177200.1.p|Glyma.04G248300.1.p|Glyma.08G013800.1.p|Glyma.08G020500.1.p|Glyma.05G240100.1.p|Glyma.19G154100.2.p|Glyma.11G024100.1.p|Glyma.12G032300.1.p|Glyma.10G047700.1.p|Glyma.08G254500.1.p|Glyma.05G209200.1.p|Glyma.17G223900.1.p|Glyma.18G021100.1.p|Glyma.19G177200.1.p|Glyma.08G174700.1.p…	http://www.genome.jp/kegg-bin/show_pathway?gmx00480/gmx:100784258%09red/gmx:100306295%09red/gmx:547597%09red/gmx:547576%09red/gmx:100793025%09red/gmx:100792735%09red/gmx:100786103%09red/gmx:100775476%09red/gmx:100306570%09red/gmx:100802238%09red/gmx:553156%09red/gmx:100819151%09red/gmx:100803548%09red/gmx:100776863%09red/gmx:100799504%09red/gmx:100306136%09red/gmx:100799034%09red/gmx:100305775%09…
Glycine, serine and threonine metabolism	KEGG PATHWAY	gmx00260	29	123	3.39728e-13	2.33563e-12	Glyma.11G042200.1.p|Glyma.07G232900.1.p|Glyma.02G038100.2.p|Glyma.01G026700.1.p|Glyma.15G178400.1.p|Glyma.05G033500.1.p|Glyma.20G019600.1.p|Glyma.05G151100.1.p|Glyma.12G085900.1.p|Glyma.14G094700.1.p|Glyma.05G240700.1.p|Glyma.10G281400.1.p|Glyma.20G019700.1.p|Glyma.07G262100.2.p|Glyma.17G012000.1.p|Glyma.08G282800.1.p|Glyma.20G107800.1.p|Glyma.11G084400.1.p|Glyma.08G274400.1.p|Glyma.17G037900.1.p…	http://www.genome.jp/kegg-bin/show_pathway?gmx00260/gmx:100779623%09red/gmx:100809241%09red/gmx:100803176%09red/gmx:100794084%09red/gmx:100793061%09red/gmx:100812952%09red/gmx:100785811%09red/gmx:100127415%09red/gmx:100796561%09red/gmx:548099%09red/gmx:100811186%09red/gmx:100812202%09red/gmx:547640%09red/gmx:100499635%09red/gmx:100778188%09red/gmx:100779355%09red/gmx:100792708%09red/gmx:100819714…
Protein processing in endoplasmic reticulum	KEGG PATHWAY	gmx04141	50	375	7.33241e-13	4.7445e-12	Glyma.05G238500.1.p|Glyma.10G014700.1.p|Glyma.12G045400.1.p|Glyma.11G084700.2.p|Glyma.12G172800.1.p|Glyma.06G114800.1.p|Glyma.10G147600.2.p|Glyma.12G010300.2.p|Glyma.12G064000.1.p|Glyma.07G170800.1.p|Glyma.12G177100.1.p|Glyma.08G223800.1.p|Glyma.20G098400.1.p|Glyma.02G014000.3.p|Glyma.01G081500.1.p|Glyma.02G270000.1.p|Glyma.14G099900.1.p|Glyma.08G045500.1.p|Glyma.13G328300.1.p|Glyma.09G007600.1.p…	http://www.genome.jp/kegg-bin/show_pathway?gmx04141/gmx:100810637%09red/gmx:100785017%09red/gmx:100820543%09red/gmx:100777767%09red/gmx:100814162%09red/gmx:100499727%09red/gmx:100790223%09red/gmx:100802236%09red/gmx:100814374%09red/gmx:100779976%09red/gmx:100819019%09red/gmx:100799569%09red/gmx:547558%09red/gmx:100527683%09red/gmx:100810595%09red/gmx:100786898%09red/gmx:100811234%09red/gmx:100806…
RNA transport	KEGG PATHWAY	gmx03013	41	272	2.69124e-12	1.64465e-11	Glyma.02G236700.1.p|Glyma.11G237500.3.p|Glyma.05G003400.1.p|Glyma.01G074700.1.p|Glyma.11G227900.1.p|Glyma.01G227300.1.p|Glyma.04G233700.1.p|Glyma.02G205500.1.p|Glyma.01G029600.1.p|Glyma.08G172000.1.p|Glyma.03G172200.2.p|Glyma.07G060900.1.p|Glyma.02G103900.1.p|Glyma.15G026100.1.p|Glyma.18G029500.1.p|Glyma.10G250400.1.p|Glyma.02G097300.1.p|Glyma.11G141500.2.p|Glyma.18G165200.1.p|Glyma.08G290700.1.p…	http://www.genome.jp/kegg-bin/show_pathway?gmx03013/gmx:100816245%09red/gmx:100785130%09red/gmx:100783618%09red/gmx:100802805%09red/gmx:100817394%09red/gmx:100527187%09red/gmx:100791863%09red/gmx:100526922%09red/gmx:100783362%09red/gmx:100777906%09red/gmx:100778595%09red/gmx:100777129%09red/gmx:100785429%09red/gmx:100789296%09red/gmx:100817317%09red/gmx:100780715%09red/gmx:100775688%09red/gmx:100…
2-Oxocarboxylic acid metabolism	KEGG PATHWAY	gmx01210	23	94	4.84012e-11	2.80217e-10	Glyma.17G216000.2.p|Glyma.05G240700.1.p|Glyma.12G122900.1.p|Glyma.15G072500.1.p|Glyma.02G038100.2.p|Glyma.01G026700.1.p|Glyma.02G241200.1.p|Glyma.06G082400.1.p|Glyma.13G131900.1.p|Glyma.08G157700.1.p|Glyma.17G256100.1.p|Glyma.06G074900.1.p|Glyma.05G167700.1.p|Glyma.13G144900.1.p|Glyma.05G005300.1.p|Glyma.07G118300.1.p|Glyma.08G047800.1.p|Glyma.13G207900.1.p|Glyma.15G005400.1.p|Glyma.20G000500.1.p…	http://www.genome.jp/kegg-bin/show_pathway?gmx01210/gmx:100786103%09red/gmx:100793061%09red/gmx:100781418%09red/gmx:100127415%09red/gmx:100819151%09red/gmx:547792%09red/gmx:100780547%09red/gmx:100806689%09red/gmx:100811326%09red/gmx:100814183%09red/gmx:100779210%09red/gmx:100810468%09red/gmx:100783934%09red/gmx:100782688%09red/gmx:547509%09red/gmx:100499625%09red/gmx:100789879%09red/gmx:100783172…
Pentose phosphate pathway	KEGG PATHWAY	gmx00030	23	114	1.28773e-09	7.08249e-09	Glyma.18G193600.1.p|Glyma.14G010900.1.p|Glyma.05G056400.1.p|Glyma.07G142700.1.p|Glyma.02G202500.1.p|Glyma.15G136200.1.p|Glyma.17G101700.2.p|Glyma.08G020500.1.p|Glyma.10G293500.1.p|Glyma.19G088400.1.p|Glyma.20G243500.1.p|Glyma.08G254500.1.p|Glyma.10G241000.1.p|Glyma.17G075300.1.p|Glyma.03G246300.1.p|Glyma.12G037400.1.p|Glyma.02G303000.1.p|Glyma.04G008300.1.p|Glyma.16G168000.1.p|Glyma.14G189400.1.p…	http://www.genome.jp/kegg-bin/show_pathway?gmx00030/gmx:100809452%09red/gmx:100500085%09red/gmx:100796103%09red/gmx:100783936%09red/gmx:100807451%09red/gmx:100780041%09red/gmx:100775844%09red/gmx:100789100%09red/gmx:100803740%09red/gmx:100799034%09red/gmx:100781676%09red/gmx:100798677%09red/gmx:100792394%09red/gmx:100802730%09red/gmx:100799873%09red/gmx:100792666%09red/gmx:100786514%09red/gmx:100…
Fatty acid biosynthesis	KEGG PATHWAY	gmx00061	19	79	2.9036e-09	1.52093e-08	Glyma.05G221100.1.p|Glyma.11G101400.1.p|Glyma.13G112700.2.p|Glyma.18G195900.1.p|Glyma.19G028800.1.p|Glyma.18G057700.1.p|Glyma.20G143900.1.p|Glyma.07G207200.1.p|Glyma.18G243500.1.p|Glyma.01G225200.1.p|Glyma.15G052500.1.p|Glyma.12G027300.1.p|Glyma.08G349200.1.p|Glyma.09G248900.1.p|Glyma.05G129600.1.p|Glyma.15G248500.1.p|Glyma.08G084300.1.p|Glyma.16G042000.1.p|Glyma.11G248000.1.p	http://www.genome.jp/kegg-bin/show_pathway?gmx00061/gmx:547575%09red/gmx:100217331%09red/gmx:100777962%09red/gmx:547498%09red/gmx:100809416%09red/gmx:100817945%09red/gmx:100814965%09red/gmx:100806814%09red/gmx:548072%09red/gmx:100037453%09red/gmx:3989306%09red/gmx:100301904%09red/gmx:100785606%09red/gmx:732644%09red/gmx:100777266%09red/gmx:100037462%09red/gmx:100795986%09red/gmx:100778244%09red/g…
Arginine biosynthesis	KEGG PATHWAY	gmx00220	16	59	1.20441e-08	6.02206e-08	Glyma.07G118300.1.p|Glyma.06G096700.1.p|Glyma.05G046700.1.p|Glyma.13G210800.2.p|Glyma.06G074900.1.p|Glyma.05G236000.1.p|Glyma.17G216000.2.p|Glyma.13G131900.1.p|Glyma.06G082400.1.p|Glyma.04G030500.1.p|Glyma.11G215500.1.p|Glyma.03G028000.1.p|Glyma.15G102000.2.p|Glyma.02G038100.2.p|Glyma.20G000500.1.p|Glyma.01G026700.1.p	http://www.genome.jp/kegg-bin/show_pathway?gmx00220/gmx:100127415%09red/gmx:100787173%09red/gmx:547792%09red/gmx:100780873%09red/gmx:100775828%09red/gmx:100780483%09red/gmx:100797501%09red/gmx:547994%09red/gmx:100499845%09red/gmx:100795886%09red/gmx:547509%09red/gmx:100783172%09red/gmx:547953%09red/gmx:100814183%09red/gmx:100809547%09red
Ascorbate and aldarate metabolism	KEGG PATHWAY	gmx00053	17	74	3.4845e-08	1.6665e-07	Glyma.10G067500.1.p|Glyma.15G115500.1.p|Glyma.06G114400.1.p|Glyma.12G032300.1.p|Glyma.08G064100.1.p|Glyma.06G183900.1.p|Glyma.06G068200.1.p|Glyma.08G017800.1.p|Glyma.11G209100.1.p|Glyma.02G209000.1.p|Glyma.14G177200.1.p|Glyma.08G002700.1.p|Glyma.12G073100.1.p|Glyma.04G248300.1.p|Glyma.03G247000.1.p|Glyma.15G178400.1.p|Glyma.U021900.1.p	http://www.genome.jp/kegg-bin/show_pathway?gmx00053/gmx:100811501%09red/gmx:100500084%09red/gmx:100784258%09red/gmx:100794772%09red/gmx:100799504%09red/gmx:100817591%09red/gmx:100819919%09red/gmx:100809400%09red/gmx:100792735%09red/gmx:100170727%09red/gmx:100800699%09red/gmx:606508%09red/gmx:100802238%09red/gmx:100795192%09red/gmx:100811186%09red/gmx:553156%09red
Fatty acid metabolism	KEGG PATHWAY	gmx01212	20	124	3.79449e-07	1.73914e-06	Glyma.10G124700.1.p|Glyma.05G221100.1.p|Glyma.11G101400.1.p|Glyma.13G112700.2.p|Glyma.18G195900.1.p|Glyma.19G028800.1.p|Glyma.18G057700.1.p|Glyma.20G143900.1.p|Glyma.07G207200.1.p|Glyma.18G243500.1.p|Glyma.01G225200.1.p|Glyma.15G052500.1.p|Glyma.12G027300.1.p|Glyma.15G248500.1.p|Glyma.09G248900.1.p|Glyma.05G129600.1.p|Glyma.11G035200.1.p|Glyma.08G084300.1.p|Glyma.16G042000.1.p|Glyma.11G248000.1.p	http://www.genome.jp/kegg-bin/show_pathway?gmx01212/gmx:547575%09red/gmx:100217331%09red/gmx:100777962%09red/gmx:547498%09red/gmx:100809416%09red/gmx:100817945%09red/gmx:100814965%09red/gmx:100806814%09red/gmx:548072%09red/gmx:100037453%09red/gmx:3989306%09red/gmx:100170734%09red/gmx:100301904%09red/gmx:547625%09red/gmx:100785606%09red/gmx:732644%09red/gmx:100777266%09red/gmx:100037462%09red/gmx:…
Porphyrin and chlorophyll metabolism	KEGG PATHWAY	gmx00860	16	85	9.12984e-07	3.89704e-06	Glyma.02G301700.1.p|Glyma.12G222200.1.p|Glyma.10G138600.1.p|Glyma.01G227400.1.p|Glyma.19G139300.1.p|Glyma.08G007900.1.p|Glyma.13G232500.1.p|Glyma.05G200500.3.p|Glyma.06G002900.1.p|Glyma.04G002900.1.p|Glyma.02G218300.1.p|Glyma.04G247700.1.p|Glyma.12G021100.1.p|Glyma.06G221900.3.p|Glyma.04G147700.1.p|Glyma.14G003200.1.p	http://www.genome.jp/kegg-bin/show_pathway?gmx00860/gmx:547795%09red/gmx:100779132%09red/gmx:547612%09red/gmx:100784256%09red/gmx:100780934%09red/gmx:100812733%09red/gmx:100817017%09red/gmx:100787735%09red/gmx:100818277%09red/gmx:100810190%09red/gmx:100790574%09red/gmx:100819951%09red/gmx:100785637%09red/gmx:548095%09red/gmx:100819913%09red
Nitrogen metabolism	KEGG PATHWAY	gmx00910	14	64	9.21118e-07	3.89704e-06	Glyma.07G212800.2.p|Glyma.02G035000.1.p|Glyma.01G030500.1.p|Glyma.03G128300.2.p|Glyma.13G210800.2.p|Glyma.06G109200.1.p|Glyma.14G164900.1.p|Glyma.05G007100.1.p|Glyma.02G132100.1.p|Glyma.10G005200.1.p|Glyma.11G215500.1.p|Glyma.15G102000.2.p|Glyma.18G138400.1.p|Glyma.19G007700.1.p	http://www.genome.jp/kegg-bin/show_pathway?gmx00910/gmx:100808326%09red/gmx:100781868%09red/gmx:548016%09red/gmx:100810496%09red/gmx:100780873%09red/gmx:100775519%09red/gmx:100803945%09red/gmx:100305967%09red/gmx:100818103%09red/gmx:732631%09red/gmx:547953%09red/gmx:732634%09red
Peroxisome	KEGG PATHWAY	gmx04146	21	150	1.54583e-06	6.29783e-06	Glyma.12G178800.1.p|Glyma.05G005300.1.p|Glyma.19G240400.1.p|Glyma.02G241200.1.p|Glyma.16G153900.1.p|Glyma.08G175800.1.p|Glyma.06G017900.1.p|Glyma.05G037400.1.p|Glyma.05G059400.1.p|Glyma.04G017500.1.p|Glyma.11G035200.1.p|Glyma.10G124700.1.p|Glyma.01G225200.1.p|Glyma.15G250800.1.p|Glyma.20G143900.1.p|Glyma.17G141800.1.p|Glyma.10G193500.1.p|Glyma.17G009400.1.p|Glyma.18G116900.1.p|Glyma.03G242900.2.p…	http://www.genome.jp/kegg-bin/show_pathway?gmx04146/gmx:100170734%09red/gmx:100170726%09red/gmx:100819151%09red/gmx:100815376%09red/gmx:100786361%09red/gmx:100527390%09red/gmx:547531%09red/gmx:100780008%09red/gmx:100786103%09red/gmx:100814965%09red/gmx:100170730%09red/gmx:100527058%09red/gmx:100786630%09red/gmx:100500051%09red/gmx:100305732%09red/gmx:100301904%09red/gmx:547625%09red/gmx:100777153…
Cysteine and methionine metabolism	KEGG PATHWAY	gmx00270	24	195	2.26117e-06	8.88315e-06	Glyma.10G006500.1.p|Glyma.17G216000.2.p|Glyma.12G159300.1.p|Glyma.05G026300.1.p|Glyma.16G038300.1.p|Glyma.18G137100.1.p|Glyma.06G082400.1.p|Glyma.05G151100.1.p|Glyma.05G240700.1.p|Glyma.03G244800.2.p|Glyma.08G167100.1.p|Glyma.15G190500.1.p|Glyma.02G005500.1.p|Glyma.08G063800.1.p|Glyma.17G140600.2.p|Glyma.17G100600.1.p|Glyma.07G185400.1.p|Glyma.07G206800.1.p|Glyma.07G233800.1.p|Glyma.08G047800.1.p…	http://www.genome.jp/kegg-bin/show_pathway?gmx00270/gmx:100814810%09red/gmx:547963%09red/gmx:100787994%09red/gmx:100793061%09red/gmx:100820392%09red/gmx:100806420%09red/gmx:547792%09red/gmx:100799793%09red/gmx:100776863%09red/gmx:100500592%09red/gmx:100803035%09red/gmx:100812202%09red/gmx:100101865%09red/gmx:547643%09red/gmx:100101900%09red/gmx:547509%09red/gmx:100814757%09red/gmx:100811402%09red…
Alanine, aspartate and glutamate metabolism	KEGG PATHWAY	gmx00250	16	95	3.29333e-06	1.24919e-05	Glyma.01G026700.1.p|Glyma.04G216000.1.p|Glyma.16G218500.1.p|Glyma.18G043600.1.p|Glyma.13G210800.2.p|Glyma.05G236000.1.p|Glyma.17G216000.2.p|Glyma.06G096700.1.p|Glyma.05G046700.1.p|Glyma.11G215500.1.p|Glyma.06G055100.1.p|Glyma.15G102000.2.p|Glyma.02G038100.2.p|Glyma.06G082400.1.p|Glyma.13G328600.1.p|Glyma.18G116900.1.p	http://www.genome.jp/kegg-bin/show_pathway?gmx00250/gmx:100127415%09red/gmx:100787173%09red/gmx:547724%09red/gmx:547792%09red/gmx:100783047%09red/gmx:100817195%09red/gmx:100780483%09red/gmx:100499845%09red/gmx:100786630%09red/gmx:100795886%09red/gmx:547509%09red/gmx:100780873%09red/gmx:547953%09red/gmx:100819867%09red/gmx:100788470%09red
Propanoate metabolism	KEGG PATHWAY	gmx00640	12	56	6.5701e-06	2.40904e-05	Glyma.05G221100.1.p|Glyma.13G125400.1.p|Glyma.18G195900.1.p|Glyma.19G028800.1.p|Glyma.10G039000.1.p|Glyma.17G140600.2.p|Glyma.18G243500.1.p|Glyma.07G232900.1.p|Glyma.15G248500.1.p|Glyma.09G248900.1.p|Glyma.17G037900.1.p|Glyma.15G143100.1.p	http://www.genome.jp/kegg-bin/show_pathway?gmx00640/gmx:100527938%09red/gmx:100777962%09red/gmx:547498%09red/gmx:547523%09red/gmx:100788043%09red/gmx:548072%09red/gmx:100803176%09red/gmx:100790952%09red/gmx:3989306%09red/gmx:100803035%09red/gmx:100037462%09red/gmx:100778244%09red
Proteasome	KEGG PATHWAY	gmx03050	16	105	1.02209e-05	3.62676e-05	Glyma.05G079000.2.p|Glyma.04G029400.1.p|Glyma.14G073000.1.p|Glyma.16G126200.1.p|Glyma.10G151900.1.p|Glyma.14G014800.5.p|Glyma.04G194700.3.p|Glyma.03G073300.2.p|Glyma.12G147200.1.p|Glyma.13G031200.2.p|Glyma.03G262800.1.p|Glyma.08G167600.1.p|Glyma.08G048800.1.p|Glyma.10G295600.1.p|Glyma.12G117600.1.p|Glyma.07G002200.1.p	http://www.genome.jp/kegg-bin/show_pathway?gmx03050/gmx:100799108%09red/gmx:100778498%09red/gmx:100777078%09red/gmx:100794489%09red/gmx:100820387%09red/gmx:100817941%09red/gmx:100788486%09red/gmx:100499664%09red/gmx:100792921%09red/gmx:100807110%09red/gmx:100803124%09red/gmx:100812783%09red/gmx:100499738%09red/gmx:100796358%09red/gmx:100808133%09red/gmx:100790481%09red
Fructose and mannose metabolism	KEGG PATHWAY	gmx00051	17	129	2.9798e-05	0.000102431	Glyma.02G245800.1.p|Glyma.01G167500.1.p|Glyma.03G185800.1.p|Glyma.16G199200.1.p|Glyma.02G303000.1.p|Glyma.14G010900.1.p|Glyma.07G142700.1.p|Glyma.12G036700.1.p|Glyma.04G008300.1.p|Glyma.12G037400.1.p|Glyma.16G168000.1.p|Glyma.19G186000.1.p|Glyma.14G189400.1.p|Glyma.18G193600.1.p|Glyma.13G336200.1.p|Glyma.02G250800.1.p|Glyma.17G066200.3.p	http://www.genome.jp/kegg-bin/show_pathway?gmx00051/gmx:100806500%09red/gmx:100819824%09red/gmx:100807451%09red/gmx:100775844%09red/gmx:100808375%09red/gmx:547761%09red/gmx:100799358%09red/gmx:100798677%09red/gmx:100792394%09red/gmx:100804624%09red/gmx:100797023%09red/gmx:100777692%09red/gmx:100820630%09red/gmx:100778363%09red/gmx:100799873%09red
Biotin metabolism	KEGG PATHWAY	gmx00780	8	27	3.25946e-05	0.000106892	Glyma.11G101400.1.p|Glyma.15G052500.1.p|Glyma.13G112700.2.p|Glyma.12G027300.1.p|Glyma.05G129600.1.p|Glyma.08G084300.1.p|Glyma.16G042000.1.p|Glyma.11G248000.1.p	http://www.genome.jp/kegg-bin/show_pathway?gmx00780/gmx:548028%09red/gmx:100809416%09red/gmx:100817945%09red/gmx:100806814%09red/gmx:100037453%09red/gmx:100785606%09red/gmx:547575%09red/gmx:100777266%09red
One carbon pool by folate	KEGG PATHWAY	gmx00670	9	36	3.30394e-05	0.000106892	Glyma.06G325300.1.p|Glyma.18G150000.1.p|Glyma.17G012000.1.p|Glyma.16G164900.5.p|Glyma.13G222300.1.p|Glyma.07G262100.2.p|Glyma.08G274400.1.p|Glyma.20G243700.1.p|Glyma.14G184500.1.p	http://www.genome.jp/kegg-bin/show_pathway?gmx00670/gmx:100797489%09red/gmx:100499635%09red/gmx:100778188%09red/gmx:100305381%09red/gmx:100812952%09red/gmx:100809241%09red/gmx:100797707%09red/gmx:100806844%09red
C5-Branched dibasic acid metabolism	KEGG PATHWAY	gmx00660	6	13	4.47771e-05	0.000140728	Glyma.05G167700.1.p|Glyma.15G005400.1.p|Glyma.17G256100.1.p|Glyma.07G032200.1.p|Glyma.15G072500.1.p|Glyma.08G210500.1.p	http://www.genome.jp/kegg-bin/show_pathway?gmx00660/gmx:100779210%09red/gmx:100782688%09red/gmx:100780547%09red/gmx:100783934%09red/gmx:100809737%09red/gmx:100810468%09red
Arachidonic acid metabolism	KEGG PATHWAY	gmx00590	8	30	6.13813e-05	0.000187554	Glyma.17G223900.1.p|Glyma.19G154100.2.p|Glyma.11G024100.1.p|Glyma.08G047200.1.p|Glyma.05G240100.1.p|Glyma.02G077100.1.p|Glyma.08G013800.1.p|Glyma.18G021100.1.p	http://www.genome.jp/kegg-bin/show_pathway?gmx00590/gmx:100527297%09red/gmx:100306295%09red/gmx:100797040%09red/gmx:100306136%09red/gmx:100798465%09red/gmx:100305775%09red/gmx:100306570%09red/gmx:100306590%09red
Sulfur metabolism	KEGG PATHWAY	gmx00920	11	63	8.241e-05	0.000243297	Glyma.11G014100.1.p|Glyma.07G206800.1.p|Glyma.13G261400.1.p|Glyma.09G004400.1.p|Glyma.03G244800.2.p|Glyma.08G167100.1.p|Glyma.09G258000.1.p|Glyma.10G242600.1.p|Glyma.13G051000.1.p|Glyma.09G246700.1.p|Glyma.12G019400.1.p	http://www.genome.jp/kegg-bin/show_pathway?gmx00920/gmx:100101865%09red/gmx:100806420%09red/gmx:100805275%09red/gmx:100798053%09red/gmx:100499929%09red/gmx:100780846%09red/gmx:100101900%09red/gmx:547630%09red/gmx:547634%09red/gmx:100817799%09red/gmx:100790764%09red
Monobactam biosynthesis	KEGG PATHWAY	gmx00261	6	15	8.40482e-05	0.000243297	Glyma.05G151100.1.p|Glyma.08G047800.1.p|Glyma.05G240700.1.p|Glyma.09G268200.1.p|Glyma.10G242600.1.p|Glyma.13G051000.1.p	http://www.genome.jp/kegg-bin/show_pathway?gmx00261/gmx:100814757%09red/gmx:100805275%09red/gmx:100793061%09red/gmx:547634%09red/gmx:100788930%09red/gmx:100812202%09red
Valine, leucine and isoleucine biosynthesis	KEGG PATHWAY	gmx00290	8	37	0.000215187	0.000606939	Glyma.05G167700.1.p|Glyma.13G207900.1.p|Glyma.15G005400.1.p|Glyma.17G256100.1.p|Glyma.12G122900.1.p|Glyma.07G032200.1.p|Glyma.15G072500.1.p|Glyma.08G210500.1.p	http://www.genome.jp/kegg-bin/show_pathway?gmx00290/gmx:100779210%09red/gmx:100782688%09red/gmx:100780547%09red/gmx:100783934%09red/gmx:100806689%09red/gmx:100809737%09red/gmx:100789879%09red/gmx:100810468%09red
Phagosome	KEGG PATHWAY	gmx04145	17	165	0.000444779	0.00122314	Glyma.03G180700.1.p|Glyma.08G224400.1.p|Glyma.06G162600.1.p|Glyma.01G109300.1.p|Glyma.08G115100.1.p|Glyma.10G147600.2.p|Glyma.04G202900.1.p|Glyma.05G110200.1.p|Glyma.10G052700.1.p|Glyma.05G135300.2.p|Glyma.08G081100.1.p|Glyma.19G127700.1.p|Glyma.05G199200.1.p|Glyma.01G015600.1.p|Glyma.20G098400.1.p|Glyma.09G245700.1.p|Glyma.08G020300.1.p	http://www.genome.jp/kegg-bin/show_pathway?gmx04145/gmx:547851%09red/gmx:100787058%09red/gmx:100795235%09red/gmx:100798849%09red/gmx:100810595%09red/gmx:100305477%09red/gmx:100499803%09red/gmx:100775727%09red/gmx:100810149%09red/gmx:100811997%09red/gmx:732582%09red/gmx:100305531%09red/gmx:100037475%09red/gmx:100802236%09red/gmx:100814088%09red/gmx:100816898%09red/gmx:100801608%09red
Lysine biosynthesis	KEGG PATHWAY	gmx00300	6	22	0.000467661	0.0012547	Glyma.05G151100.1.p|Glyma.08G047800.1.p|Glyma.03G181200.1.p|Glyma.05G240700.1.p|Glyma.09G268200.1.p|Glyma.15G178400.1.p	http://www.genome.jp/kegg-bin/show_pathway?gmx00300/gmx:100814757%09red/gmx:100786832%09red/gmx:100793061%09red/gmx:100788930%09red/gmx:100811186%09red/gmx:100812202%09red
mRNA surveillance pathway	KEGG PATHWAY	gmx03015	19	216	0.00124544	0.00326186	Glyma.13G334200.1.p|Glyma.02G103900.1.p|Glyma.11G015500.1.p|Glyma.11G237500.3.p|Glyma.05G243400.1.p|Glyma.02G068500.2.p|Glyma.01G227300.1.p|Glyma.10G189500.1.p|Glyma.11G141500.2.p|Glyma.11G055500.1.p|Glyma.07G215300.3.p|Glyma.18G081700.1.p|Glyma.03G019600.1.p|Glyma.08G172000.1.p|Glyma.17G240400.1.p|Glyma.18G019700.1.p|Glyma.08G128300.1.p|Glyma.18G077300.4.p|Glyma.19G232300.1.p	http://www.genome.jp/kegg-bin/show_pathway?gmx03015/gmx:100813792%09red/gmx:100816245%09red/gmx:100791525%09red/gmx:100804778%09red/gmx:100817317%09red/gmx:100784412%09red/gmx:100811385%09red/gmx:100780329%09red/gmx:100813735%09red/gmx:100527187%09red/gmx:100811056%09red/gmx:100794390%09red/gmx:100526922%09red/gmx:100783362%09red/gmx:100786788%09red/gmx:100778595%09red/gmx:100786288%09red/gmx:100…
Aminoacyl-tRNA biosynthesis	KEGG PATHWAY	gmx00970	14	140	0.00176863	0.00452441	Glyma.12G043200.1.p|Glyma.05G236700.1.p|Glyma.08G311400.1.p|Glyma.07G263100.1.p|Glyma.03G183400.1.p|Glyma.01G032500.1.p|Glyma.08G031100.1.p|Glyma.04G099400.1.p|Glyma.05G059500.1.p|Glyma.08G363700.1.p|Glyma.11G065500.1.p|Glyma.10G214200.3.p|Glyma.02G234500.1.p|Glyma.03G109000.1.p	http://www.genome.jp/kegg-bin/show_pathway?gmx00970/gmx:100777795%09red/gmx:100793186%09red/gmx:100804064%09red/gmx:100781232%09red/gmx:100810476%09red/gmx:100801732%09red/gmx:100812652%09red/gmx:100781674%09red/gmx:100812345%09red/gmx:100809150%09red/gmx:100776622%09red/gmx:100787720%09red/gmx:100803308%09red/gmx:100813016%09red
Cyanoamino acid metabolism	KEGG PATHWAY	gmx00460	10	84	0.00247288	0.00618219	Glyma.18G150000.1.p|Glyma.10G106600.1.p|Glyma.14G184500.1.p|Glyma.08G150400.1.p|Glyma.13G222300.1.p|Glyma.08G274400.1.p|Glyma.09G258000.1.p|Glyma.11G180900.1.p|Glyma.07G100500.1.p|Glyma.18G021100.1.p	http://www.genome.jp/kegg-bin/show_pathway?gmx00460/gmx:100305381%09red/gmx:100806420%09red/gmx:100499635%09red/gmx:100797040%09red/gmx:547729%09red/gmx:100809047%09red/gmx:100812952%09red/gmx:100814740%09red/gmx:100778110%09red
Tyrosine metabolism	KEGG PATHWAY	gmx00350	10	85	0.00267421	0.00653282	Glyma.05G181000.1.p|Glyma.08G282800.1.p|Glyma.06G082400.1.p|Glyma.17G216000.2.p|Glyma.06G122600.1.p|Glyma.06G270400.1.p|Glyma.09G010000.1.p|Glyma.13G183200.1.p|Glyma.13G183500.1.p|Glyma.03G168700.1.p	http://www.genome.jp/kegg-bin/show_pathway?gmx00350/gmx:547792%09red/gmx:100801369%09red/gmx:100801361%09red/gmx:100801918%09red/gmx:100783091%09red/gmx:547509%09red/gmx:100499743%09red/gmx:100798709%09red/gmx:100792012%09red/gmx:100817986%09red
Phenylalanine, tyrosine and tryptophan biosynthesis	KEGG PATHWAY	gmx00400	9	71	0.00273191	0.00653282	Glyma.05G181000.1.p|Glyma.20G179500.1.p|Glyma.06G082400.1.p|Glyma.01G082200.1.p|Glyma.16G058800.1.p|Glyma.17G216000.2.p|Glyma.02G073000.1.p|Glyma.15G054700.1.p|Glyma.20G103200.1.p	http://www.genome.jp/kegg-bin/show_pathway?gmx00400/gmx:547792%09red/gmx:100783691%09red/gmx:100814518%09red/gmx:100811217%09red/gmx:100801361%09red/gmx:547509%09red/gmx:100781618%09red/gmx:100789764%09red/gmx:100526928%09red
Isoquinoline alkaloid biosynthesis	KEGG PATHWAY	gmx00950	7	46	0.00320911	0.00751067	Glyma.05G181000.1.p|Glyma.08G282800.1.p|Glyma.06G082400.1.p|Glyma.17G216000.2.p|Glyma.06G270400.1.p|Glyma.13G183200.1.p|Glyma.13G183500.1.p	http://www.genome.jp/kegg-bin/show_pathway?gmx00950/gmx:547792%09red/gmx:100801369%09red/gmx:100801361%09red/gmx:100792012%09red/gmx:100783091%09red/gmx:547509%09red/gmx:100798709%09red
Terpenoid backbone biosynthesis	KEGG PATHWAY	gmx00900	10	91	0.00417356	0.0095644	Glyma.11G021400.1.p|Glyma.13G262200.1.p|Glyma.17G002400.1.p|Glyma.12G046000.1.p|Glyma.08G093400.1.p|Glyma.09G015600.1.p|Glyma.11G120900.1.p|Glyma.16G089000.1.p|Glyma.13G326400.2.p|Glyma.16G141700.1.p	http://www.genome.jp/kegg-bin/show_pathway?gmx00900/gmx:100801743%09red/gmx:100785539%09red/gmx:100817632%09red/gmx:100788186%09red/gmx:100306378%09red/gmx:100805941%09red/gmx:100805316%09red/gmx:100818067%09red/gmx:100802347%09red/gmx:100783538%09red
Vitamin B6 metabolism	KEGG PATHWAY	gmx00750	5	25	0.00448198	0.0100616	Glyma.03G060100.1.p|Glyma.11G084400.1.p|Glyma.13G225000.1.p|Glyma.15G087200.1.p|Glyma.04G093600.1.p	http://www.genome.jp/kegg-bin/show_pathway?gmx00750/gmx:732627%09red/gmx:100816306%09red/gmx:100795497%09red/gmx:100779355%09red/gmx:100776337%09red
Butanoate metabolism	KEGG PATHWAY	gmx00650	6	37	0.00472899	0.0104038	Glyma.16G218500.1.p|Glyma.13G349100.1.p|Glyma.18G043600.1.p|Glyma.05G167700.1.p|Glyma.07G059800.1.p|Glyma.15G072500.1.p	http://www.genome.jp/kegg-bin/show_pathway?gmx00650/gmx:100779210%09red/gmx:547724%09red/gmx:100783047%09red/gmx:100783934%09red/gmx:100817216%09red/gmx:100781928%09red
Purine metabolism	KEGG PATHWAY	gmx00230	21	284	0.00494209	0.0106594	Glyma.16G043400.1.p|Glyma.10G058000.1.p|Glyma.17G127400.1.p|Glyma.10G156900.1.p|Glyma.20G024800.1.p|Glyma.04G045000.1.p|Glyma.15G203100.1.p|Glyma.10G184900.1.p|Glyma.17G128300.1.p|Glyma.09G234300.1.p|Glyma.05G046300.1.p|Glyma.16G043500.1.p|Glyma.13G144800.1.p|Glyma.07G115900.1.p|Glyma.05G066500.1.p|Glyma.05G216700.1.p|Glyma.10G242600.1.p|Glyma.13G051000.1.p|Glyma.11G221100.1.p|Glyma.10G241000.1.p…	http://www.genome.jp/kegg-bin/show_pathway?gmx00230/gmx:100777103%09red/gmx:100811753%09red/gmx:547689%09red/gmx:100305792%09red/gmx:100800098%09red/gmx:100805275%09red/gmx:547987%09red/gmx:100818572%09red/gmx:100818830%09red/gmx:100814972%09red/gmx:100801737%09red/gmx:100784833%09red/gmx:100802730%09red/gmx:100780391%09red/gmx:100791848%09red/gmx:100797579%09red/gmx:100527475%09red/gmx:100784319…
Phenylpropanoid biosynthesis	KEGG PATHWAY	gmx00940	23	332	0.00696148	0.0147262	Glyma.03G145600.1.p|Glyma.02G234200.1.p|Glyma.16G164200.1.p|Glyma.13G106400.1.p|Glyma.10G106600.1.p|Glyma.09G022400.1.p|Glyma.17G171100.1.p|Glyma.10G222500.1.p|Glyma.07G100500.1.p|Glyma.18G055300.1.p|Glyma.09G022900.1.p|Glyma.08G150400.1.p|Glyma.07G087500.1.p|Glyma.20G169200.1.p|Glyma.20G214200.1.p|Glyma.09G277800.1.p|Glyma.14G053700.1.p|Glyma.15G129200.1.p|Glyma.18G211000.1.p|Glyma.05G103600.1.p…	http://www.genome.jp/kegg-bin/show_pathway?gmx00940/gmx:100783920%09red/gmx:547499%09red/gmx:100809071%09red/gmx:106796332%09red/gmx:100793973%09red/gmx:100815671%09red/gmx:100814740%09red/gmx:100814455%09red/gmx:100817540%09red/gmx:547550%09red/gmx:100305498%09red/gmx:548068%09red/gmx:100804126%09red/gmx:547729%09red/gmx:100809047%09red/gmx:100783115%09red/gmx:100812478%09red/gmx:100811247%09red…
Other glycan degradation	KEGG PATHWAY	gmx00511	5	31	0.00988593	0.020138	Glyma.16G048100.1.p|Glyma.10G260900.1.p|Glyma.10G290900.1.p|Glyma.04G200900.1.p|Glyma.02G046800.1.p	http://www.genome.jp/kegg-bin/show_pathway?gmx00511/gmx:100814818%09red/gmx:100798150%09red/gmx:100776282%09red/gmx:100817294%09red/gmx:100775419%09red
Selenocompound metabolism	KEGG PATHWAY	gmx00450	5	31	0.00988593	0.020138	Glyma.10G242600.1.p|Glyma.13G051000.1.p|Glyma.16G038300.1.p|Glyma.10G113100.1.p|Glyma.02G185300.1.p	http://www.genome.jp/kegg-bin/show_pathway?gmx00450/gmx:100794561%09red/gmx:547643%09red/gmx:100805275%09red/gmx:100819254%09red/gmx:547634%09red
Fatty acid degradation	KEGG PATHWAY	gmx00071	9	93	0.0132114	0.0264228	Glyma.10G124700.1.p|Glyma.06G183900.1.p|Glyma.20G143900.1.p|Glyma.11G035200.1.p|Glyma.06G122600.1.p|Glyma.01G225200.1.p|Glyma.08G002700.1.p|Glyma.03G168700.1.p|Glyma.15G178400.1.p	http://www.genome.jp/kegg-bin/show_pathway?gmx00071/gmx:100811501%09red/gmx:100814965%09red/gmx:100801918%09red/gmx:100800699%09red/gmx:100170734%09red/gmx:100301904%09red/gmx:547625%09red/gmx:100499743%09red/gmx:100811186%09red
Folate biosynthesis	KEGG PATHWAY	gmx00790	5	36	0.0169048	0.0332058	Glyma.07G068300.1.p|Glyma.03G203800.4.p|Glyma.02G251400.1.p|Glyma.13G267800.1.p|Glyma.13G267900.1.p	http://www.genome.jp/kegg-bin/show_pathway?gmx00790/gmx:100527653%09red/gmx:547881%09red/gmx:100526908%09red/gmx:100811054%09red
Lysine degradation	KEGG PATHWAY	gmx00310	6	54	0.0229602	0.0443092	Glyma.02G094300.1.p|Glyma.02G292500.1.p|Glyma.06G183900.1.p|Glyma.14G022100.1.p|Glyma.08G002700.1.p|Glyma.15G178400.1.p	http://www.genome.jp/kegg-bin/show_pathway?gmx00310/gmx:100811501%09red/gmx:100800699%09red/gmx:100813488%09red/gmx:100786978%09red/gmx:100811186%09red/gmx:100799149%09red
Pyrimidine metabolism	KEGG PATHWAY	gmx00240	15	217	0.0260339	0.0493747	Glyma.03G102700.1.p|Glyma.05G216700.1.p|Glyma.16G043400.1.p|Glyma.17G127400.1.p|Glyma.16G083500.1.p|Glyma.07G105400.1.p|Glyma.10G113100.1.p|Glyma.07G121000.1.p|Glyma.16G043500.1.p|Glyma.03G069600.1.p|Glyma.07G115900.1.p|Glyma.11G154200.4.p|Glyma.04G216000.1.p|Glyma.13G328600.1.p|Glyma.02G185300.1.p	http://www.genome.jp/kegg-bin/show_pathway?gmx00240/gmx:100811753%09red/gmx:100306684%09red/gmx:100794561%09red/gmx:100818990%09red/gmx:100819254%09red/gmx:100527475%09red/gmx:100784833%09red/gmx:100807008%09red/gmx:100797953%09red/gmx:100306603%09red/gmx:100787491%09red/gmx:100819867%09red/gmx:100788470%09red/gmx:547870%09red
Pantothenate and CoA biosynthesis	KEGG PATHWAY	gmx00770	6	56	0.0265176	0.0494395	Glyma.02G276900.1.p|Glyma.07G105400.1.p|Glyma.13G207900.1.p|Glyma.12G122900.1.p|Glyma.05G167700.1.p|Glyma.15G072500.1.p	http://www.genome.jp/kegg-bin/show_pathway?gmx00770/gmx:100779210%09red/gmx:100783934%09red/gmx:100818990%09red/gmx:100806689%09red/gmx:100798626%09red/gmx:100789879%09red
Histidine metabolism	KEGG PATHWAY	gmx00340	5	43	0.0313309	0.0564983	Glyma.15G131700.1.p|Glyma.06G183900.1.p|Glyma.03G176400.1.p|Glyma.15G178400.1.p|Glyma.08G002700.1.p	http://www.genome.jp/kegg-bin/show_pathway?gmx00340/gmx:100811501%09red/gmx:100800699%09red/gmx:100816684%09red/gmx:100811186%09red/gmx:100817490%09red
Tropane, piperidine and pyridine alkaloid biosynthesis	KEGG PATHWAY	gmx00960	5	43	0.0313309	0.0564983	Glyma.05G181000.1.p|Glyma.06G082400.1.p|Glyma.08G282800.1.p|Glyma.17G216000.2.p|Glyma.18G186800.1.p	http://www.genome.jp/kegg-bin/show_pathway?gmx00960/gmx:100783091%09red/gmx:100306108%09red/gmx:547792%09red/gmx:100801361%09red/gmx:547509%09red
Valine, leucine and isoleucine degradation	KEGG PATHWAY	gmx00280	8	93	0.0333802	0.059135	Glyma.10G124700.1.p|Glyma.06G183900.1.p|Glyma.07G232900.1.p|Glyma.08G002700.1.p|Glyma.17G037900.1.p|Glyma.15G143100.1.p|Glyma.15G178400.1.p|Glyma.08G204300.1.p	http://www.genome.jp/kegg-bin/show_pathway?gmx00280/gmx:100811501%09red/gmx:547523%09red/gmx:100810130%09red/gmx:100803176%09red/gmx:100800699%09red/gmx:100170734%09red/gmx:100811186%09red/gmx:100788043%09red
Biosynthesis of unsaturated fatty acids	KEGG PATHWAY	gmx01040	5	44	0.0338682	0.059135	Glyma.10G124700.1.p|Glyma.11G035200.1.p|Glyma.11G248000.1.p|Glyma.16G042000.1.p|Glyma.07G207200.1.p	http://www.genome.jp/kegg-bin/show_pathway?gmx01040/gmx:100809416%09red/gmx:100217331%09red/gmx:100170734%09red/gmx:547625%09red/gmx:100806814%09red
beta-Alanine metabolism	KEGG PATHWAY	gmx00410	8	95	0.0368718	0.0633735	Glyma.08G282800.1.p|Glyma.16G218500.1.p|Glyma.18G137100.1.p|Glyma.06G183900.1.p|Glyma.15G178400.1.p|Glyma.18G043600.1.p|Glyma.08G002700.1.p|Glyma.07G105400.1.p	http://www.genome.jp/kegg-bin/show_pathway?gmx00410/gmx:100811501%09red/gmx:547724%09red/gmx:100783047%09red/gmx:100776863%09red/gmx:100818990%09red/gmx:100800699%09red/gmx:100783091%09red/gmx:100811186%09red
Linoleic acid metabolism	KEGG PATHWAY	gmx00591	5	48	0.0452655	0.0762263	Glyma.20G054000.1.p|Glyma.07G006900.1.p|Glyma.15G026500.1.p|Glyma.07G034800.1.p|Glyma.07G007000.1.p	http://www.genome.jp/kegg-bin/show_pathway?gmx00591/gmx:106794093%09red/gmx:547856%09red/gmx:100127399%09red/gmx:547835%09red/gmx:100101853%09red
Riboflavin metabolism	KEGG PATHWAY	gmx00740	3	19	0.0457358	0.0762263	Glyma.12G112900.1.p|Glyma.15G041600.1.p|Glyma.13G042600.4.p	http://www.genome.jp/kegg-bin/show_pathway?gmx00740/gmx:100791686%09red/gmx:100786573%09red/gmx:100809163%09red
Tryptophan metabolism	KEGG PATHWAY	gmx00380	6	70	0.0616205	0.101168	Glyma.02G094300.1.p|Glyma.06G183900.1.p|Glyma.04G017500.1.p|Glyma.06G017900.1.p|Glyma.08G002700.1.p|Glyma.15G178400.1.p	http://www.genome.jp/kegg-bin/show_pathway?gmx00380/gmx:100811501%09red/gmx:100800699%09red/gmx:100786978%09red/gmx:547511%09red/gmx:100811186%09red/gmx:100037448%09red
Phenylalanine metabolism	KEGG PATHWAY	gmx00360	6	72	0.0681618	0.110262	Glyma.05G181000.1.p|Glyma.08G282800.1.p|Glyma.06G082400.1.p|Glyma.17G216000.2.p|Glyma.17G171100.1.p|Glyma.07G214700.1.p	http://www.genome.jp/kegg-bin/show_pathway?gmx00360/gmx:547792%09red/gmx:100811247%09red/gmx:100801361%09red/gmx:100305498%09red/gmx:100783091%09red/gmx:547509%09red
Protein export	KEGG PATHWAY	gmx03060	7	91	0.0705386	0.112453	Glyma.12G064100.1.p|Glyma.08G025700.1.p|Glyma.03G196900.1.p|Glyma.08G038100.1.p|Glyma.20G224600.1.p|Glyma.11G245300.1.p|Glyma.10G162200.1.p	http://www.genome.jp/kegg-bin/show_pathway?gmx03060/gmx:100782581%09red/gmx:100817173%09red/gmx:547838%09red/gmx:100815810%09red/gmx:100500409%09red/gmx:100815190%09red/gmx:100807037%09red
RNA degradation	KEGG PATHWAY	gmx03018	12	193	0.0785609	0.123453	Glyma.02G155300.1.p|Glyma.18G229600.2.p|Glyma.02G103900.1.p|Glyma.20G079300.1.p|Glyma.08G175900.1.p|Glyma.07G215300.3.p|Glyma.10G193200.1.p|Glyma.03G190500.1.p|Glyma.19G190900.1.p|Glyma.17G240400.1.p|Glyma.02G082300.1.p|Glyma.20G197100.1.p	http://www.genome.jp/kegg-bin/show_pathway?gmx03018/gmx:547752%09red/gmx:100795851%09red/gmx:100813735%09red/gmx:100811385%09red/gmx:100780329%09red/gmx:100820546%09red/gmx:100811084%09red/gmx:100777674%09red/gmx:100811995%09red/gmx:100499782%09red/gmx:100818544%09red/gmx:100797765%09red
Thiamine metabolism	KEGG PATHWAY	gmx00730	3	27	0.0973651	0.150847	Glyma.01G197100.2.p|Glyma.08G188200.1.p|Glyma.10G251500.1.p	http://www.genome.jp/kegg-bin/show_pathway?gmx00730/gmx:100785725%09red/gmx:100788953%09red/gmx:100811722%09red
Carotenoid biosynthesis	KEGG PATHWAY	gmx00906	5	64	0.110961	0.168941	Glyma.19G251000.1.p|Glyma.17G174500.1.p|Glyma.01G154900.1.p|Glyma.03G253500.1.p|Glyma.11G253000.1.p	http://www.genome.jp/kegg-bin/show_pathway?gmx00906/gmx:100816085%09red/gmx:100127420%09red/gmx:100800186%09red/gmx:100778118%09red/gmx:100777875%09red
Arginine and proline metabolism	KEGG PATHWAY	gmx00330	8	123	0.112115	0.168941	Glyma.18G137100.1.p|Glyma.06G082400.1.p|Glyma.06G183900.1.p|Glyma.17G216000.2.p|Glyma.17G021200.1.p|Glyma.03G028000.1.p|Glyma.08G002700.1.p|Glyma.15G178400.1.p	http://www.genome.jp/kegg-bin/show_pathway?gmx00330/gmx:100811501%09red/gmx:547792%09red/gmx:100776863%09red/gmx:547994%09red/gmx:100800699%09red/gmx:547509%09red/gmx:100783075%09red/gmx:100811186%09red
Sulfur relay system	KEGG PATHWAY	gmx04122	2	17	0.154001	0.225627	Glyma.01G197100.2.p|Glyma.08G167100.1.p	http://www.genome.jp/kegg-bin/show_pathway?gmx04122/gmx:100785725%09red/gmx:100798053%09red
Taurine and hypotaurine metabolism	KEGG PATHWAY	gmx00430	3	34	0.155045	0.225627	Glyma.18G043600.1.p|Glyma.16G218500.1.p|Glyma.18G021100.1.p	http://www.genome.jp/kegg-bin/show_pathway?gmx00430/gmx:547724%09red/gmx:100783047%09red/gmx:100797040%09red
Amino sugar and nucleotide sugar metabolism	KEGG PATHWAY	gmx00520	14	266	0.155888	0.225627	Glyma.02G245800.1.p|Glyma.01G167500.1.p|Glyma.03G120000.3.p|Glyma.19G124500.1.p|Glyma.12G180300.1.p|Glyma.02G250800.1.p|Glyma.10G290900.1.p|Glyma.06G205600.1.p|Glyma.12G234300.2.p|Glyma.12G084100.1.p|Glyma.03G247000.1.p|Glyma.02G120900.1.p|Glyma.02G212600.1.p|Glyma.10G241000.1.p	http://www.genome.jp/kegg-bin/show_pathway?gmx00520/gmx:100809452%09red/gmx:102667779%09red/gmx:100806458%09red/gmx:100794772%09red/gmx:100814818%09red/gmx:100808375%09red/gmx:100816315%09red/gmx:100792879%09red/gmx:100802730%09red/gmx:100809983%09red/gmx:100775641%09red/gmx:100797023%09red/gmx:100787207%09red/gmx:100777692%09red
Limonene and pinene degradation	KEGG PATHWAY	gmx00903	2	19	0.180464	0.257806	Glyma.06G183900.1.p|Glyma.08G002700.1.p	http://www.genome.jp/kegg-bin/show_pathway?gmx00903/gmx:100811501%09red/gmx:100800699%09red
alpha-Linolenic acid metabolism	KEGG PATHWAY	gmx00592	6	106	0.232765	0.328259	Glyma.20G054000.1.p|Glyma.01G235600.1.p|Glyma.11G035200.1.p|Glyma.06G122600.1.p|Glyma.10G124700.1.p|Glyma.12G191400.1.p	http://www.genome.jp/kegg-bin/show_pathway?gmx00592/gmx:100784395%09red/gmx:100801918%09red/gmx:106794093%09red/gmx:100170734%09red/gmx:547625%09red/gmx:100803381%09red
Inositol phosphate metabolism	KEGG PATHWAY	gmx00562	6	111	0.263509	0.362324	Glyma.15G115500.1.p|Glyma.03G185800.1.p|Glyma.19G186000.1.p|Glyma.20G126600.1.p|Glyma.14G059200.1.p|Glyma.13G336200.1.p	http://www.genome.jp/kegg-bin/show_pathway?gmx00562/gmx:100819824%09red/gmx:100817591%09red/gmx:547761%09red/gmx:100799358%09red/gmx:100799214%09red/gmx:547864%09red
Galactose metabolism	KEGG PATHWAY	gmx00052	6	111	0.263509	0.362324	Glyma.12G036700.1.p|Glyma.05G056300.1.p|Glyma.07G102900.1.p|Glyma.15G133700.1.p|Glyma.17G138500.1.p|Glyma.10G241000.1.p	http://www.genome.jp/kegg-bin/show_pathway?gmx00052/gmx:100806500%09red/gmx:100777498%09red/gmx:100799487%09red/gmx:100802730%09red/gmx:100788844%09red/gmx:100776238%09red
Glycosphingolipid biosynthesis - ganglio series	KEGG PATHWAY	gmx00604	1	8	0.286961	0.3897	Glyma.10G290900.1.p	http://www.genome.jp/kegg-bin/show_pathway?gmx00604/gmx:100814818%09red
Endocytosis	KEGG PATHWAY	gmx04144	15	334	0.309221	0.414808	Glyma.13G352200.1.p|Glyma.09G068000.1.p|Glyma.07G127300.1.p|Glyma.09G002100.1.p|Glyma.19G172200.1.p|Glyma.19G172700.1.p|Glyma.02G009600.1.p|Glyma.12G064000.1.p|Glyma.07G170800.1.p|Glyma.13G130900.1.p|Glyma.08G211700.1.p|Glyma.04G210200.2.p|Glyma.11G140500.1.p|Glyma.12G147400.1.p|Glyma.10G195600.1.p	http://www.genome.jp/kegg-bin/show_pathway?gmx04144/gmx:100786410%09red/gmx:100778966%09red/gmx:100802587%09red/gmx:100775459%09red/gmx:100807561%09red/gmx:102667572%09red/gmx:100816111%09red/gmx:100778302%09red/gmx:100777767%09red/gmx:100795747%09red/gmx:100780154%09red/gmx:100812707%09red/gmx:100798307%09red/gmx:100527083%09red/gmx:100791887%09red
Nucleotide excision repair	KEGG PATHWAY	gmx03420	6	122	0.334139	0.438179	Glyma.20G114700.1.p|Glyma.01G030600.1.p|Glyma.13G236400.1.p|Glyma.01G030800.1.p|Glyma.08G223800.1.p|Glyma.01G081500.1.p	http://www.genome.jp/kegg-bin/show_pathway?gmx03420/gmx:100526985%09red/gmx:100819019%09red/gmx:100499859%09red/gmx:100814162%09red/gmx:100809066%09red/gmx:100499987%09red
Pentose and glucuronate interconversions	KEGG PATHWAY	gmx00040	9	194	0.3347	0.438179	Glyma.12G036700.1.p|Glyma.16G199200.1.p|Glyma.19G088400.1.p|Glyma.06G183900.1.p|Glyma.08G044000.1.p|Glyma.17G066200.3.p|Glyma.08G002700.1.p|Glyma.05G025300.2.p|Glyma.17G101700.2.p	http://www.genome.jp/kegg-bin/show_pathway?gmx00040/gmx:100811501%09red/gmx:100775898%09red/gmx:100806500%09red/gmx:100500085%09red/gmx:100804624%09red/gmx:100800699%09red/gmx:100786514%09red/gmx:100820630%09red/gmx:100817791%09red
Flavone and flavonol biosynthesis	KEGG PATHWAY	gmx00944	1	10	0.338593	0.438179	Glyma.06G137100.1.p	http://www.genome.jp/kegg-bin/show_pathway?gmx00944/gmx:100805999%09red
Plant-pathogen interaction	KEGG PATHWAY	gmx04626	14	325	0.371188	0.474775	Glyma.08G177600.1.p|Glyma.11G030100.1.p|Glyma.01G211700.1.p|Glyma.15G062700.1.p|Glyma.08G053500.3.p|Glyma.02G008500.1.p|Glyma.01G068000.1.p|Glyma.02G302500.1.p|Glyma.18G039500.1.p|Glyma.18G074100.1.p|Glyma.09G131500.1.p|Glyma.05G245600.1.p|Glyma.02G275600.1.p|Glyma.14G219700.1.p	http://www.genome.jp/kegg-bin/show_pathway?gmx04626/gmx:100808383%09red/gmx:100791597%09red/gmx:100500081%09red/gmx:100785017%09red/gmx:100527568%09red/gmx:100794671%09red/gmx:100811234%09red/gmx:100500636%09red/gmx:100783572%09red/gmx:100807250%09red/gmx:100194422%09red/gmx:100194423%09red/gmx:100817351%09red/gmx:100779976%09red
Monoterpenoid biosynthesis	KEGG PATHWAY	gmx00902	1	14	0.430917	0.544838	Glyma.07G073800.1.p	http://www.genome.jp/kegg-bin/show_pathway?gmx00902/gmx:100804943%09red
Stilbenoid, diarylheptanoid and gingerol biosynthesis	KEGG PATHWAY	gmx00945	2	44	0.509816	0.63727	Glyma.17G171100.1.p|Glyma.07G214700.1.p	http://www.genome.jp/kegg-bin/show_pathway?gmx00945/gmx:100811247%09red/gmx:100305498%09red
Mismatch repair	KEGG PATHWAY	gmx03430	3	74	0.543822	0.67214	Glyma.13G236400.1.p|Glyma.01G030600.1.p|Glyma.01G030800.1.p	http://www.genome.jp/kegg-bin/show_pathway?gmx03430/gmx:100526985%09red/gmx:100499859%09red/gmx:100499987%09red
Glycosphingolipid biosynthesis - globo series	KEGG PATHWAY	gmx00603	1	21	0.562578	0.687595	Glyma.10G290900.1.p	http://www.genome.jp/kegg-bin/show_pathway?gmx00603/gmx:100814818%09red
Ribosome biogenesis in eukaryotes	KEGG PATHWAY	gmx03008	6	159	0.571389	0.69069	Glyma.04G069200.1.p|Glyma.19G110900.1.p|Glyma.18G020000.1.p|Glyma.03G164500.1.p|Glyma.13G167800.1.p|Glyma.19G165900.1.p	http://www.genome.jp/kegg-bin/show_pathway?gmx03008/gmx:100306376%09red/gmx:100500467%09red/gmx:100813605%09red/gmx:100789137%09red/gmx:100788981%09red/gmx:100527424%09red
Homologous recombination	KEGG PATHWAY	gmx03440	3	81	0.603034	0.721019	Glyma.13G236400.1.p|Glyma.01G030600.1.p|Glyma.01G030800.1.p	http://www.genome.jp/kegg-bin/show_pathway?gmx03440/gmx:100526985%09red/gmx:100499859%09red/gmx:100499987%09red
SNARE interactions in vesicular transport	KEGG PATHWAY	gmx04130	3	87	0.649565	0.768303	Glyma.10G051400.1.p|Glyma.09G097700.1.p|Glyma.01G015600.1.p	http://www.genome.jp/kegg-bin/show_pathway?gmx04130/gmx:100819272%09red/gmx:100306336%09red/gmx:100810149%09red
Phosphatidylinositol signaling system	KEGG PATHWAY	gmx04070	4	118	0.662627	0.775415	Glyma.15G115500.1.p|Glyma.20G126600.1.p|Glyma.02G275600.1.p|Glyma.14G059200.1.p	http://www.genome.jp/kegg-bin/show_pathway?gmx04070/gmx:100799214%09red/gmx:100817591%09red/gmx:547864%09red/gmx:100817351%09red
Steroid biosynthesis	KEGG PATHWAY	gmx00100	2	60	0.671807	0.777882	Glyma.04G020600.1.p|Glyma.10G090500.1.p	http://www.genome.jp/kegg-bin/show_pathway?gmx00100/gmx:548073%09red/gmx:100804517%09red
Glycosaminoglycan degradation	KEGG PATHWAY	gmx00531	1	30	0.688143	0.788498	Glyma.10G290900.1.p	http://www.genome.jp/kegg-bin/show_pathway?gmx00531/gmx:100814818%09red
AGE-RAGE signaling pathway in diabetic complications	KEGG PATHWAY	gmx04933	1	35	0.741591	0.833239	Glyma.14G059200.1.p	http://www.genome.jp/kegg-bin/show_pathway?gmx04933/gmx:547864%09red
Starch and sucrose metabolism	KEGG PATHWAY	gmx00500	15	452	0.742341	0.833239	Glyma.02G245800.1.p|Glyma.19G125800.1.p|Glyma.13G062700.1.p|Glyma.05G056300.1.p|Glyma.10G106600.1.p|Glyma.08G150400.1.p|Glyma.13G114000.1.p|Glyma.04G017700.1.p|Glyma.15G133700.1.p|Glyma.17G138500.1.p|Glyma.08G044000.1.p|Glyma.07G100500.1.p|Glyma.08G334000.1.p|Glyma.02G212600.1.p|Glyma.10G241000.1.p	http://www.genome.jp/kegg-bin/show_pathway?gmx00500/gmx:100809452%09red/gmx:100775898%09red/gmx:100792499%09red/gmx:100777498%09red/gmx:100793021%09red/gmx:100814740%09red/gmx:100799487%09red/gmx:100809047%09red/gmx:100802730%09red/gmx:547729%09red/gmx:100789789%09red/gmx:100301883%09red/gmx:100797023%09red/gmx:547508%09red/gmx:100788844%09red
Glycerolipid metabolism	KEGG PATHWAY	gmx00561	4	135	0.757927	0.842141	Glyma.06G183900.1.p|Glyma.08G002700.1.p|Glyma.15G178400.1.p|Glyma.12G036700.1.p	http://www.genome.jp/kegg-bin/show_pathway?gmx00561/gmx:100811501%09red/gmx:100806500%09red/gmx:100800699%09red/gmx:100811186%09red
DNA replication	KEGG PATHWAY	gmx03030	3	106	0.770572	0.847629	Glyma.13G236400.1.p|Glyma.01G030600.1.p|Glyma.01G030800.1.p	http://www.genome.jp/kegg-bin/show_pathway?gmx03030/gmx:100526985%09red/gmx:100499859%09red/gmx:100499987%09red
Ubiquitin mediated proteolysis	KEGG PATHWAY	gmx04120	6	214	0.824596	0.897241	Glyma.11G079600.1.p|Glyma.10G133700.1.p|Glyma.09G257800.1.p|Glyma.11G064000.1.p|Glyma.04G096900.1.p|Glyma.01G163900.1.p	http://www.genome.jp/kegg-bin/show_pathway?gmx04120/gmx:100813186%09red/gmx:100812138%09red/gmx:100812184%09red/gmx:100809769%09red/gmx:100527683%09red/gmx:100800213%09red
Ether lipid metabolism	KEGG PATHWAY	gmx00565	1	47	0.83544	0.897241	Glyma.08G211700.1.p	http://www.genome.jp/kegg-bin/show_pathway?gmx00565/gmx:100786410%09red
Flavonoid biosynthesis	KEGG PATHWAY	gmx00941	2	86	0.840144	0.897241	Glyma.17G171100.1.p|Glyma.07G214700.1.p	http://www.genome.jp/kegg-bin/show_pathway?gmx00941/gmx:100811247%09red/gmx:100305498%09red
Basal transcription factors	KEGG PATHWAY	gmx03022	2	89	0.853451	0.902688	Glyma.17G037200.1.p|Glyma.04G027700.1.p	http://www.genome.jp/kegg-bin/show_pathway?gmx03022/gmx:100306277%09red/gmx:100788473%09red
Cutin, suberine and wax biosynthesis	KEGG PATHWAY	gmx00073	1	52	0.863651	0.904778	Glyma.09G123800.1.p	http://www.genome.jp/kegg-bin/show_pathway?gmx00073/gmx:100799842%09red
Base excision repair	KEGG PATHWAY	gmx03410	1	69	0.92807	0.963092	Glyma.01G116000.6.p	http://www.genome.jp/kegg-bin/show_pathway?gmx03410/gmx:100305961%09red
N-Glycan biosynthesis	KEGG PATHWAY	gmx00510	1	74	0.940406	0.966773	Glyma.12G045400.1.p	http://www.genome.jp/kegg-bin/show_pathway?gmx00510/gmx:100806848%09red
Ubiquinone and other terpenoid-quinone biosynthesis	KEGG PATHWAY	gmx00130	1	89	0.966113	0.984004	Glyma.07G188200.1.p	http://www.genome.jp/kegg-bin/show_pathway?gmx00130/gmx:100805113%09red
Glycerophospholipid metabolism	KEGG PATHWAY	gmx00564	2	173	0.989351	0.998428	Glyma.08G211700.1.p|Glyma.17G078900.1.p	http://www.genome.jp/kegg-bin/show_pathway?gmx00564/gmx:100800181%09red/gmx:100786410%09red
Plant hormone signal transduction	KEGG PATHWAY	gmx04075	4	618	1	1	Glyma.08G133600.1.p|Glyma.06G040400.1.p|Glyma.01G018800.1.p|Glyma.15G062700.1.p	http://www.genome.jp/kegg-bin/show_pathway?gmx04075/gmx:100819216%09red/gmx:100101876%09red/gmx:100807250%09red/gmx:100807981%09red
--------------------
#Term	Database	ID	Input number	Background number	P-Value	Corrected P-Value	Input	Hyperlink
--------------------
#Term	Database	ID	Input number	Background number	P-Value	Corrected P-Value	Input	Hyperlink
--------------------
